# Supplementary material for: Chromatin spatial analysis by METALoci unveils sex-determining 3D regulatory hubs
Source: Springer Nature journal article supplement (doi:10.1038/s41594-026-01749-z), 2026-02-24
Supplement: MOESM1 [file 41594_2026_1749_MOESM1_ESM.pdf › 26159suppl/41594_2026_1749_MOESM1_ESM.pdf]

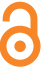

---

# Chromatin spatial analysis by METALoci unveils sex-determining 3D regulatory hubs

---

In the format provided by the  
authors and unedited

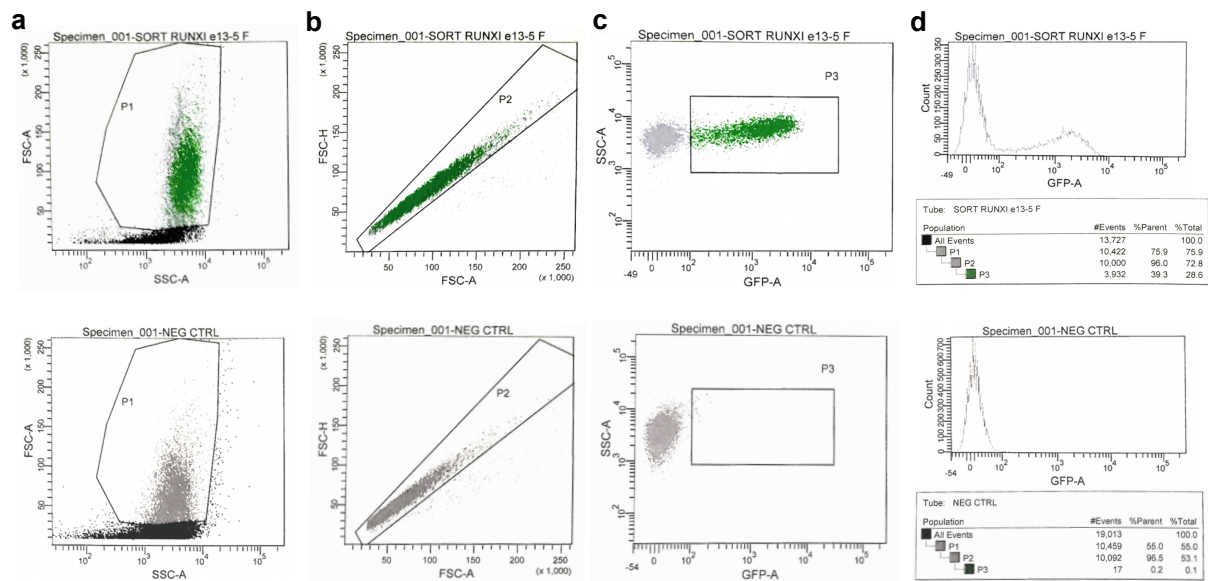

**Supplementary Data Fig. 1: FACS gating strategy for XX E13.5 Runx1-GFP sample.** In each panel, the sample containing cells of interest is represented by the plot on the top row, and the negative control on the bottom row. **a.** Cells were gated on an FSC-A and SSC-A plot to select for cells and eliminate debris. **b.** Cells were gated on an FSC-H and FSC-A plot to select for singlets and eliminate doublets. **c.** Cells were gated on an SSC-A and GFP-A plot to identify fluorescent cells of interest. **d.** Histograms representing the cells identified by the gating strategy as event counts over fluorescence intensity (top). Representative data indicating cell population abundance for both the sample and negative control, with P1, P2, and P3 relating to the populations identified in panels a, b, and c, respectively (bottom)

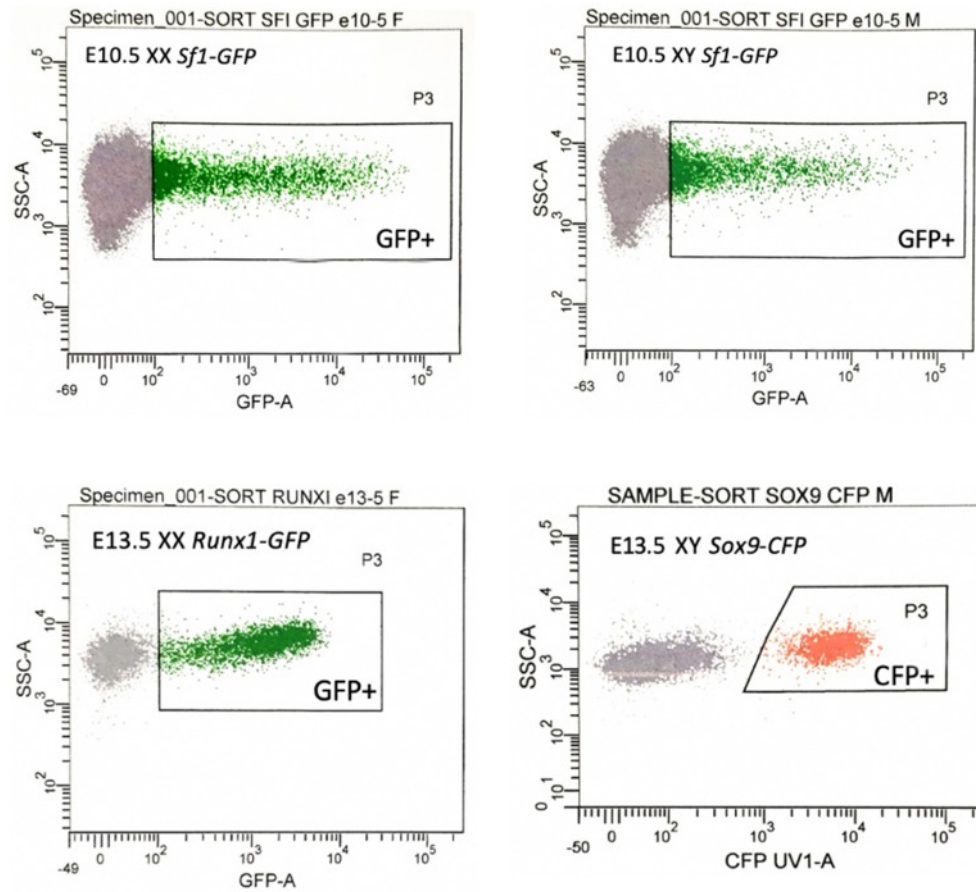

**Supplementary Data Fig. 2: Representative FACS profiles for each supporting cell population collected.** Gating indicated with grey boxes. The boundaries between fluorescent and non-fluorescent populations were defined each sort based on a negative control brought with the sample. Gates were established based on the negative control, allowing fluorescent cells to be identified as outside of the negative gates.

**Supplementary Data File 1: Coordinates for HH metaloci in each sample.**

*The EDFile1\_H3K27ac\_metaloci\_per\_gene.zip file contains four files named:*

- XX10.5\_H3K27ac\_HH\_metaloci\_per\_gene.bed
- XX13.5\_H3K27ac\_HH\_metaloci\_per\_gene.bed
- XY10.5\_H3K27ac\_HH\_metaloci\_per\_gene.bed
- XY13.5\_H3K27ac\_HH\_metaloci\_per\_gene.bed

*Each BED file contains the following columns tab separated:*

|                   |                                          |
|-------------------|------------------------------------------|
| chr               | Chromosome                               |
| start             | Start coordinates                        |
| end               | End coordinates                          |
| MetaLociBinNumber | Number of the bin in the METALoci layout |
| GeneSymbol        | Gene symbol                              |

*This ZIP file can be anonymously accessed in ZENODO (10.5281/zenodo.7334816) at this URL: <https://doi.org/10.5281/zenodo.7334816>*

***Supplementary Data File 2: Coordinates for all ATAC-seq accessible peak within a metaloci and their associated gene in each sample.***

*The EDFile2\_TF\_ATAC\_ML\_Sites.zip file contains four files named:*

- XX10.5\_TF\_ATAC\_ML\_Sites.tsv
- XX13.5\_TF\_ATAC\_ML\_Sites.tsv
- XY10.5\_TF\_ATAC\_ML\_Sites.tsv
- XY13.5\_TF\_ATAC\_ML\_Sites.tsv

*Each TSV file contains the following columns tab separated:*

|        |                             |
|--------|-----------------------------|
| bchr   | METALoci chromosome         |
| bstart | METALoci start coordinates  |
| bend   | METALoci end coordinates    |
| bin    | METALoci bin                |
| pchr   | ATAC site chromosome        |
| pstart | ATAC site start coordinates |
| pend   | ATAC site end coordinates   |
| gene   | Gene symbol                 |

*This ZIP file can be anonymously accessed in ZENODO (10.5281/zenodo.7334816) at this URL: <https://doi.org/10.5281/zenodo.7334816>*
