# Supplementary material for: Chromatin spatial analysis by METALoci unveils sex-determining 3D regulatory hubs
Source: Nat Struct Mol Biol. 2026 Feb 24;33(4):577–89. doi: 10.1038/s41594-026-01749-z (PMC13095655; doi:10.1038/s41594-026-01749-z)
Supplement: Supplementary file 4 — Supplementary Table 1: Statistics of H-C experiments. Supplementary Table 2: GWAS hits at the Fgf9 locus. Supplementary Table 3: Analyzed regions for METALoci. Supplementary Table 4: List of sgRNAs and primers. Supplementary Table 5: Light microscopy reporting table. [file 41594_2026_1749_MOESM4_ESM.xlsx]

## Sheet: Supplementary_Table_1
STATS	XX E10.5 replicate 1	XX E10.5 replicate 2	XX E10.5 merged	XY E10.5 replicate 1	XY E10.5 replicate 2	XY E10.5 merged	XX E13.5 replicate 1	XX E13.5 replicate 2	XX E13.5 merged	XY E13.5 replicate 1	XY E13.5 replicate 2	XY E13.5 merged
Sequenced Read Pairs	1776994161	1101266990	2878261151	750120904	1083969654	1834090558	2498714205	634976177	3133690382	523775574	759502117	1283277691
Normal Paired	1,152,810,750 (64.87%)	823,586,657 (74.79%)	1,976,397,407 (68.67%)	651,371,948 (86.84%)	501,504,989 (46.27%)	1,152,876,937 (62.86%)	983,187,147 (39.35%)	252,838,368 (39.82%)	1,236,025,515 (39.44%)	448,971,095 (85.72%)	659,887,605 (86.88%)	1,108,858,700 (86.41%)
Chimeric Paired	443,622,085 (24.96%)	195,841,372 (17.78%)	639,463,457 (22.22%)	67,543,037 (9.00%)	430,124,585 (39.68%)	497,667,622 (27.13%)	792,798,331 (31.73%)	247,499,727 (38.98%)	1,040,298,058 (33.20%)	46,876,939 (8.95%)	67,392,069 (8.87%)	114,269,008 (8.90%)
Chimeric Ambiguous	156,784,323 (8.82%)	45,309,044 (4.11%)	202,093,367 (7.02%)	21,760,946 (2.90%)	143,915,285 (13.28%)	165,676,231 (9.03%)	226,396,341 (9.06%)	81,905,116 (12.90%)	308,301,457 (9.84%)	14,043,634 (2.68%)	20,835,134 (2.74%)	34,878,768 (2.72%)
Unmapped	23,777,003 (1.34%)	36,529,917 (3.32%)	60,306,920 (2.10%)	9,444,973 (1.26%)	8,424,795 (0.78%)	17,869,768 (0.97%)	496,332,386 (19.86%)	52,732,966 (8.30%)	549,065,352 (17.52%)	13,883,906 (2.65%)	11,387,309 (1.50%)	25,271,215 (1.97%)
Alignable (Normal+Chimeric Paired)	1,596,432,835 (89.84%)	1,019,428,029 (92.57%)	2,615,860,864 (90.88%)	718,914,985 (95.84%)	931,629,574 (85.95%)	1,650,544,559 (89.99%)	1,775,985,478 (71.08%)	500,338,095 (78.80%)	2,276,323,573 (72.64%)	495,848,034 (94.67%)	727,279,674 (95.76%)	1,223,127,708 (95.31%)
Unique Reads	1296342678	531135439	1827478117	583574370	750995728	1334570098	800348671	428153729	1228502400	439495992	662481244	1101977236
PCR Duplicates	295217258	486701478	781918736	133794869	172338851	306133720	967891484	68605137	1036496621	52543882	62796337	115340219
Optical Duplicates	4872899	1591112	6464011	1545746	8294995	9840741	7745323	3579229	11324552	3808160	2002093	5810253
Intra-fragment Reads	15,140,615 (0.85% / 2.41%)	8,217,428 (0.75% / 1.55%)	23,358,043 (0.81% / 2.01%)	3,818,658 (0.51% / 0.65%)	23,484,027 (2.17% / 3.13%)	27,302,685 (1.49% / 2.05%)	30,402,159 (1.22% / 3.80%)	1,961,735 (0.31% / 0.46%)	32,363,894 (1.03% / 2.63%)	13,154,054 (2.51% / 2.99%)	15,542,582 (2.05% / 2.35%)	28,696,636 (2.24% / 2.60%)
Below MAPQ Threshold	133,868,682 (7.53% / 21.28%)	168,998,145 (15.35% / 31.82%)	302,866,827 (10.52% / 26.11%)	190,478,419 (25.39% / 32.64%)	159,909,242 (14.75% / 21.29%)	350,387,661 (19.10% / 26.25%)	228,803,414 (9.16% / 28.59%)	95,907,918 (15.10% / 22.40%)	324,711,332 (10.36% / 26.43%)	132,532,064 (25.30% / 30.16%)	196,062,523 (25.81% / 29.60%)	328,594,587 (25.61% / 29.82%)
Hi-C Contacts	479,962,812 (27.01% / 76.31%)	353,919,866 (32.14% / 66.63%)	833,882,678 (28.97% / 71.88%)	389,277,293 (51.90% / 66.71%)	567,602,459 (52.36% / 75.58%)	956,879,752 (52.17% / 71.70%)	541,143,098 (21.66% / 67.61%)	330,284,076 (52.02% / 77.14%)	871,427,174 (27.81% / 70.93%)	293,809,874 (56.09% / 66.85%)	450,876,139 (59.36% / 68.06%)	744,686,013 (58.03% / 67.58%)
Ligation Motif Present	237,920,669 (13.39% / 37.83%)	120,799,814 (10.97% / 22.74%)	358,720,483 (12.46% / 30.92%)	127,751,574 (17.03% / 21.89%)	286,304,925 (26.41% / 38.12%)	414,056,499 (22.58% / 31.03%)	256,612,898 (10.27% / 32.06%)	164,099,986 (25.84% / 38.33%)	420,712,884 (13.43% / 34.25%)	106,460,983 (20.33% / 24.22%)	151,867,946 (20.00% / 22.92%)	258,328,929 (20.13% / 23.44%)
3' Bias (Long Range)	68% - 32%	67% - 33%	67% - 33%	73% - 27%	70% - 30%	72% - 28%	74 - 26	72% - 28%	73% - 27%	75% - 25%	70% - 30%	72% - 28%
Pair Type %(L-I-O-R)	25% - 25% - 25% - 25%	25% - 25% - 25% - 25%	25% - 25% - 25% - 25%	25% - 25% - 25% - 25%	25% - 25% - 25% - 25%	25% - 25% - 25% - 25%	25 - 25 - 25 - 25	25% - 25% - 25% - 25%	25% - 25% - 25% - 25%	25% - 25% - 25% - 25%	25% - 25% - 25% - 25%	25% - 25% - 25% - 25%
Inter-chromosomal	42,271,726 (2.38% / 6.72%)	39,766,334 (3.61% / 7.49%)	82,038,060 (2.85% / 7.07%)	70,430,042 (9.39% / 12.07%)	88,369,346 (8.15% / 11.77%)	158,799,388 (8.66% / 11.90%)	76,073,050 (3.04% / 9.50%)	44,905,175 (7.07% / 10.49%)	120,978,225 (3.86% / 9.85%)	48,548,494 (9.27% / 11.05%)	63,222,198 (8.32% / 9.54%)	111,770,692 (8.71% / 10.14%)
Intra-chromosomal	437,691,086 (24.63% / 69.59%)	314,153,532 (28.53% / 59.15%)	751,844,618 (26.12% / 64.81%)	318,847,251 (42.51% / 54.64%)	479,233,113 (44.21% / 63.81%)	798,080,364 (43.51% / 59.80%)	465,070,048 (18.61% / 58.11%)	285,378,901 (44.94% / 66.65%)	750,448,949 (23.95% / 61.09%)	245,261,380 (46.83% / 55.81%)	387,653,941 (51.04% / 58.52%)	632,915,321 (49.32% / 57.43%)
Short Range (<20Kb)	209,236,291 (11.77% / 33.27%)	140,749,720 (12.78% / 26.50%)	349,986,011 (12.16% / 30.17%)	97,298,485 (12.97% / 16.67%)	167,756,413 (15.48% / 22.34%)	265,054,898 (14.45% / 19.86%)	198,810,906 (7.96% / 24.84%)	110,262,185 (17.36% / 25.75%)	309,073,091 (9.86% / 25.16%)	84,913,874 (16.21% / 19.32%)	157,689,923 (20.76% / 23.80%)	242,603,797 (18.91% / 22.02%)
Long Range (>20Kb)	228,452,287 (12.86% / 36.32%)	173,400,936 (15.75% / 32.65%)	401,853,223 (13.96% / 34.64%)	221,547,971 (29.53% / 37.96%)	311,475,389 (28.73% / 41.47%)	533,023,360 (29.06% / 39.94%)	266,258,659 (10.66% / 33.27%)	175,115,849 (27.58% / 40.90%)	441,374,508 (14.08% / 35.93%)	160,346,862 (30.61% / 36.48%)	229,960,846 (30.28% / 34.71%)	390,307,708 (30.41% / 35.42%)

## Sheet: Supplementary_Table_2
chr13:21931626-22246789 chr18:33495821-33496097 chr13:22231097-22231214 chr9:136726746-136726878
Table 1
DATE ADDED TO CATALOG	PUBMEDID	FIRST AUTHOR	DATE	JOURNAL	LINK	STUDY	DISEASE/TRAIT	INITIAL SAMPLE SIZE	REPLICATION SAMPLE SIZE	REGION	CHR_ID	CHR_POS	REPORTED GENE(S)	MAPPED_GENE	UPSTREAM_GENE_ID	DOWNSTREAM_GENE_ID	SNP_GENE_IDS	UPSTREAM_GENE_DISTANCE	DOWNSTREAM_GENE_DISTANCE	STRONGEST SNP-RISK ALLELE	SNPS	MERGED	SNP_ID_CURRENT	CONTEXT	INTERGENIC	RISK ALLELE FREQUENCY	P-VALUE	PVALUE_MLOG	P-VALUE (TEXT)	OR or BETA	95% CI (TEXT)	PLATFORM [SNPS PASSING QC]	CNV	MAPPED_TRAIT	MAPPED_TRAIT_URI	STUDY ACCESSION	GENOTYPING TECHNOLOGY
2019-02-08	30595370	Kichaev G	2018-12-27	Am J Hum Genet	www.ncbi.nlm.nih.gov/pubmed/30595370	Leveraging Polygenic Functional Enrichment to Improve GWAS Power.	Heel bone mineral density	approximately 446,000 European ancestry individuals	NA	13q12.11	13	22069427		LINC00540			ENSG00000276476			rs9509989-?	rs9509989	0	9509989	intron_variant	0	NR	4e-10	9.39794				NR [~ 8900000] (imputed)	N	heel bone mineral density	http://www.ebi.ac.uk/efo/EFO_0009270	GCST007066	Genome-wide genotyping array
2019-02-08	30595370	Kichaev G	2018-12-27	Am J Hum Genet	www.ncbi.nlm.nih.gov/pubmed/30595370	Leveraging Polygenic Functional Enrichment to Improve GWAS Power.	Heel bone mineral density	approximately 446,000 European ancestry individuals	NA	13q12.11	13	22237801		LINC00540			ENSG00000276476			rs8002850-?	rs8002850	0	8002850	intron_variant	0	NR	7e-48	47.1549				NR [~ 8900000] (imputed)	N	heel bone mineral density	http://www.ebi.ac.uk/efo/EFO_0009270	GCST007066	Genome-wide genotyping array
2020-04-16	31488892	Masuda T	2019-09-05	Eur J Hum Genet	www.ncbi.nlm.nih.gov/pubmed/31488892	GWAS of five gynecologic diseases and cross-trait analysis in Japanese.	Cervical cancer	538 Japanese ancestry cases, 39,556 Japanese ancestry controls	NA	13q12.11	13	22100187	Intergenic	LINC00540			ENSG00000276476			rs146343995-?	rs146343995	0	146343995	intron_variant	0		2e-07	6.69897		4.31	[2.49-7.46]	Illumina [7645193] (imputed)	N	cervical carcinoma	http://www.ebi.ac.uk/efo/EFO_0001061	GCST009826	Genome-wide genotyping array
2020-04-16	31488892	Masuda T	2019-09-05	Eur J Hum Genet	www.ncbi.nlm.nih.gov/pubmed/31488892	GWAS of five gynecologic diseases and cross-trait analysis in Japanese.	Cervical cancer (MTAG)	538 Japanese ancestry cases, 39,556 Japanese ancestry controls	NA	13q12.11	13	22100187	Intergenic	LINC00540			ENSG00000276476			rs146343995-?	rs146343995	0	146343995	intron_variant	0		5e-07	6.30103		1.16	[1.09-1.23]	Illumina [7645193] (imputed)	N	cervical carcinoma	http://www.ebi.ac.uk/efo/EFO_0001061	GCST009825	Genome-wide genotyping array
2018-08-13	29891935	Choquet H	2018-06-11	Nat Commun	www.ncbi.nlm.nih.gov/pubmed/29891935	A multiethnic genome-wide association study of primary open-angle glaucoma identifies novel risk loci.	Glaucoma (primary open-angle)	10,523 European ancestry cases, 203,579 European ancestry controls, 411 Hispanic cases, 4,778 Hispanic controls, 463 East Asian ancestry cases, 4,907 East Asian ancestry controls, 298 African American cases, 1,549 African American controls, 204 South Asian ancestry cases, 4,916 South Asian ancestry controls, 272 African British cases, 4,831 African British controls, 144 mixed ancestry cases, 3,42…	NA	13q12.11	13	22094919	LINC00540	LINC00540			ENSG00000276476			rs17075855-A	rs17075855	0	17075855	intron_variant	0	NR	4e-08	7.39794		1.0989	[1.06-1.14]	Affymetrix [at least 665500] (imputed)	N	open-angle glaucoma	http://www.ebi.ac.uk/efo/EFO_0004190	GCST006065	Genome-wide genotyping array
2019-01-28	30598549	Morris JA	2018-12-31	Nat Genet	www.ncbi.nlm.nih.gov/pubmed/30598549	An atlas of genetic influences on osteoporosis in humans and mice.	Heel bone mineral density	426,824 British ancestry individuals	NA	13q12.11	13	22069427	LINC00540	LINC00540			ENSG00000276476			rs9509989-T	rs9509989	0	9509989	intron_variant	0	0.118127	5e-12	11.301		0.0197323	[0.014-0.025] unit decrease	NR [13737936] (imputed)	N	heel bone mineral density	http://www.ebi.ac.uk/efo/EFO_0009270	GCST006979	Genome-wide genotyping array
2019-01-28	30598549	Morris JA	2018-12-31	Nat Genet	www.ncbi.nlm.nih.gov/pubmed/30598549	An atlas of genetic influences on osteoporosis in humans and mice.	Heel bone mineral density	426,824 British ancestry individuals	NA	13q12.11	13	22237801	LINC00540	LINC00540			ENSG00000276476			rs8002850-G	rs8002850	0	8002850	intron_variant	0	0.66551	8e-51	50.0969		0.0295206	[0.026-0.033] unit increase	NR [13737936] (imputed)	N	heel bone mineral density	http://www.ebi.ac.uk/efo/EFO_0009270	GCST006979	Genome-wide genotyping array
2020-04-17	31932636	Hebbar P	2020-01-13	Sci Rep	www.ncbi.nlm.nih.gov/pubmed/31932636	Genome-wide association study identifies novel risk variants from RPS6KA1, CADPS, VARS, and DHX58 for fasting plasma glucose in Arab population.	Fasting plasma glucose	1,353 Arab ancestry individuals	1,176 Arab ancestry individuals	13q12.11	13	22216888	LINC00540	LINC00540			ENSG00000276476			rs7329697-C	rs7329697	0	7329697	intron_variant	0	NR	3e-07	6.52288		5.102	[NR] unit increase	Illumina [632375]	N	fasting blood glucose measurement	http://www.ebi.ac.uk/efo/EFO_0004465	GCST009864	Genome-wide genotyping array
2018-09-20	28869591	Kemp JP	2017-09-04	Nat Genet	www.ncbi.nlm.nih.gov/pubmed/28869591	Identification of 153 new loci associated with heel bone mineral density and functional involvement of GPC6 in osteoporosis.	Heel bone mineral density	76,067 European ancestry women, 66,420 European ancestry men	NA	13q12.11	13	22237801	LINC00540	LINC00540			ENSG00000276476			rs8002850-G	rs8002850	0	8002850	intron_variant	0	0.663343	1e-12	12	(women)	0.0341703	[0.025-0.044] unit increase	NR [17166351] (imputed)	N	heel bone mineral density	http://www.ebi.ac.uk/efo/EFO_0009270	GCST006288	Genome-wide genotyping array
2018-09-20	28869591	Kemp JP	2017-09-04	Nat Genet	www.ncbi.nlm.nih.gov/pubmed/28869591	Identification of 153 new loci associated with heel bone mineral density and functional involvement of GPC6 in osteoporosis.	Heel bone mineral density	76,067 European ancestry women, 66,420 European ancestry men	NA	13q12.11	13	22237801	LINC00540	LINC00540			ENSG00000276476			rs8002850-G	rs8002850	0	8002850	intron_variant	0	0.665786	4e-07	6.39794	(men)	0.0267342	[0.016-0.037] unit increase	NR [17166351] (imputed)	N	heel bone mineral density	http://www.ebi.ac.uk/efo/EFO_0009270	GCST006288	Genome-wide genotyping array
2018-09-20	28869591	Kemp JP	2017-09-04	Nat Genet	www.ncbi.nlm.nih.gov/pubmed/28869591	Identification of 153 new loci associated with heel bone mineral density and functional involvement of GPC6 in osteoporosis.	Heel bone mineral density	76,067 European ancestry women, 66,420 European ancestry men	NA	13q12.11	13	22237801	LINC00540	LINC00540			ENSG00000276476			rs8002850-G	rs8002850	0	8002850	intron_variant	0	0.664482	1e-17	17		0.030048	[0.023-0.037] unit increase	NR [17166351] (imputed)	N	heel bone mineral density	http://www.ebi.ac.uk/efo/EFO_0009270	GCST006288	Genome-wide genotyping array
2017-03-30	27611488	Almoguera B	2016-09-09	Am J Respir Crit Care Med	www.ncbi.nlm.nih.gov/pubmed/27611488	Identification of Four Novel Loci in Asthma in European American and African American Populations.	Asthma (childhood onset)	1,181 African American allergic asthma child cases, 498 African American non-allergic asthma child cases, 2,993 African American child controls, 998 European American allergic asthma child cases, 182 European American non-allergic asthma child cases, 4,097 European American child controls.	NA	13q12.11	13	22056464	FGF9	LINC00540			ENSG00000276476			rs11839433-?	rs11839433	0	11839433	intron_variant	0	NR	9e-06	5.04576		0.352	[0.2-0.51] unit increase	Affymetrix, Illumina [NR] (imputed)	N	asthma	http://purl.obolibrary.org/obo/MONDO_0004979	GCST003832	Genome-wide genotyping array
2019-08-12	27903959	Lv H	2017-01-31	Oncotarget	www.ncbi.nlm.nih.gov/pubmed/27903959	Genome-wide haplotype association study identify the FGFR2 gene as a risk gene for acute myeloid leukemia.	Core binding factor acute myeloid leukemia	175 European ancestry cases, 218 European ancestry controls	NA	13q12.11	13;13	21998932;22001059	NR	No mapped genes; No mapped genes; N/A - LINC00540; N/A - LINC00540						rs7320437-T; rs9316683-C; rs9316684-C; rs17074792-T	rs7320437; rs9316683; rs9316684; rs17074792	0		intergenic_variant; intergenic_variant; intergenic_variant; intergenic_variant		0	7e-10	9.1549				Affymetrix [734624]	N	acute myeloid leukemia	http://www.ebi.ac.uk/efo/EFO_0000222	GCST008413	Genome-wide genotyping array
2019-08-12	27903959	Lv H	2017-01-31	Oncotarget	www.ncbi.nlm.nih.gov/pubmed/27903959	Genome-wide haplotype association study identify the FGFR2 gene as a risk gene for acute myeloid leukemia.	Core binding factor acute myeloid leukemia	175 European ancestry cases, 218 European ancestry controls	NA	13q12.11	13	22071322	NR	No mapped genes; LINC00540; No mapped genes; No mapped genes; No mapped genes; No mapped genes						rs4769188-A; rs9552588-C; rs12859446-T; rs9316741-T; rs9316742-A; rs1323168-G	rs4769188; rs9552588; rs12859446; rs9316741; rs9316742; rs1323168	0		intron_variant; intron_variant; intron_variant; intron_variant; intron_variant; intron_variant		0.061	3e-15	14.5229				Affymetrix [734624]	N	acute myeloid leukemia	http://www.ebi.ac.uk/efo/EFO_0000222	GCST008413	Genome-wide genotyping array
2019-08-12	27903959	Lv H	2017-01-31	Oncotarget	www.ncbi.nlm.nih.gov/pubmed/27903959	Genome-wide haplotype association study identify the FGFR2 gene as a risk gene for acute myeloid leukemia.	Core binding factor acute myeloid leukemia	175 European ancestry cases, 218 European ancestry controls	NA	13q12.11	13	22071322	NR	No mapped genes; LINC00540; No mapped genes; No mapped genes; No mapped genes; No mapped genes						rs4769188-A; rs9552588-T; rs12859446-T; rs9316741-T; rs9316742-A; rs1323168-G	rs4769188; rs9552588; rs12859446; rs9316741; rs9316742; rs1323168	0		intron_variant; intron_variant; intron_variant; intron_variant; intron_variant; intron_variant		0.282	3e-14	13.5229				Affymetrix [734624]	N	acute myeloid leukemia	http://www.ebi.ac.uk/efo/EFO_0000222	GCST008413	Genome-wide genotyping array
2017-05-11	27182965	Pickrell JK	2016-05-16	Nat Genet	www.ncbi.nlm.nih.gov/pubmed/27182965	Detection and interpretation of shared genetic influences on 42 human traits.	Chin dimples	58,032 European ancestry cases, 13,457 European ancestry controls	NA	13q12.11	13	22139569	FGF9	LINC00540			ENSG00000276476			rs73168105-?	rs73168105	0	73168105	intron_variant	0	NR	3e-13	12.5229		1.149	[1.107-1.193]	Illumina [13537761] (imputed)	N	chin morphology measurement	http://www.ebi.ac.uk/efo/EFO_0007842	GCST003989	Genome-wide genotyping array
2009-12-29	20031603	Marroni F	2009-08-01	Circ Cardiovasc Genet	www.ncbi.nlm.nih.gov/pubmed/20031603	A genome-wide association scan of RR and QT interval duration in 3 European genetically isolated populations: the EUROSPAN project.	RR interval (heart rate)	2,325 European ancestry individuals	NA	13q12.11	13	22135531	intergenic	LINC00540			ENSG00000276476			rs7318731-A	rs7318731	0	7318731	intron_variant	0	0.48	1e-06	6		0.14	[0.08-0.20] unit decrease	Illumina [~ 318327]	N	RR interval	http://www.ebi.ac.uk/efo/EFO_0004831	GCST000451	Genome-wide genotyping array
2013-11-14	23648065	Low SK	2013-05-04	Cancer Sci	www.ncbi.nlm.nih.gov/pubmed/23648065	Genome-wide association study of chemotherapeutic agent-induced severe neutropenia/leucopenia for patients in Biobank Japan.	Adverse response to chemotherapy (neutropenia/leucopenia) (all antimetabolite drugs)	294 Japanese ancestry cases, 2,249 Japanese ancestry controls	NA	13q12.11	13	22179954	LOC100506622	LINC00540			ENSG00000276476			rs9580312-G	rs9580312	0	9580312	intron_variant	0	0.409	8e-06	5.09691	(Dominant model)	1.33	[1.12-1.581]	Illumina [733202]	N	response to antineoplastic agent, response to antimetabolite	http://purl.obolibrary.org/obo/GO_0097327, http://purl.obolibrary.org/obo/GO_0097329	GCST002005	Genome-wide genotyping array
2014-10-06	24529757	Xie T	2014-01-17	Neurobiol Aging	www.ncbi.nlm.nih.gov/pubmed/24529757	Genome-wide association study combining pathway analysis for typical sporadic amyotrophic lateral sclerosis in Chinese Han populations.	Amyotrophic lateral sclerosis (sporadic)	250 Han Chinese ancestry cases, 250 Han Chinese ancestry controls	NA	13q12.11	13	22046068	FGF9	LINC00540			ENSG00000276476			rs7999075-?	rs7999075	0	7999075	intron_variant	0		1e-06	6				Illumina [859311]	N	sporadic amyotrophic lateral sclerosis	http://www.ebi.ac.uk/efo/EFO_0001357	GCST002337	Genome-wide genotyping array
2020-01-09	23823483	Rhee EP	2013-07-02	Cell Metab	www.ncbi.nlm.nih.gov/pubmed/23823483	A genome-wide association study of the human metabolome in a community-based cohort.	Metabolite levels	2,076 European ancestry individuals	NA	13q12.11	13	22203644	EFHA1	LINC00540			ENSG00000276476			rs9552616-?	rs9552616	0	9552616	intron_variant	0	NR	6e-08	7.22185	(ribose 5 P; ribulose 5 P)	0.337561	[0.22-0.46] unit increase	Affymetrix [at least 2500000] (imputed)	N	ribose-5-phosphate measurement, ribulose-5-phosphate measurement	http://www.ebi.ac.uk/efo/EFO_0010529, http://www.ebi.ac.uk/efo/EFO_0010530	GCST009391	Genome-wide genotyping array
2020-07-06	32499647	Spracklen CN	2020-05-06	Nature	www.ncbi.nlm.nih.gov/pubmed/32499647	Identification of type 2 diabetes loci in 433,540 East Asian individuals.	Type 2 diabetes	77,418 East Asian cases, 356,122 East Asian controls	NA	13q12.11	13	22015744	FGF9	NA - LINC00540		ENSG00000276476			25228	rs9316706-A	rs9316706	0	9316706	intergenic_variant	1	0.351	3e-09	8.52288		1.04	[1.03-1.06]	Affymetrix, Illumina [11800000] (imputed)	N	type 2 diabetes mellitus	http://purl.obolibrary.org/obo/MONDO_0005148	GCST010118	Genome-wide genotyping array
2015-07-28	25188341	Beecham GW	2014-09-04	PLoS Genet	www.ncbi.nlm.nih.gov/pubmed/25188341	Genome-wide association meta-analysis of neuropathologic features of Alzheimer's disease and related dementias.	Neuritic plaque	up to 4,232 individuals	NA	13q12.11	13	22155066	intergenic	LINC00540			ENSG00000276476			rs9578438-T	rs9578438	0	9578438	intron_variant	0	0.0393	1e-06	6	(Case/control)	1.2374	[0.74-1.73] unit decrease	Affymetrix, Illumina [NR] (imputed)	N	neuritic plaque measurement	http://www.ebi.ac.uk/efo/EFO_0006798	GCST002592	Genome-wide genotyping array
2021-03-30	32778093	He B	2020-08-10	BMC Biol	www.ncbi.nlm.nih.gov/pubmed/32778093	Genome-wide pQTL analysis of protein expression regulatory networks in the human liver.	Protein quantitative trait loci (liver)	172 European ancestry individuals, 29 Black individuals, 86 individuals	NA	13q12.11	13	22201823	NR	LINC00540			ENSG00000276476			rs17076345-A	rs17076345	0	17076345	intron_variant	0	0.04181	8e-09	8.09691	(ACAT2)	0.4655	NR unit increase	Illumina [1671387] (imputed)	N	protein measurement	http://www.ebi.ac.uk/efo/EFO_0004747	GCST011427	Genome-wide genotyping array
2020-12-14	32042192	Ruth KS	2020-02-10	Nat Med	www.ncbi.nlm.nih.gov/pubmed/32042192	Using human genetics to understand the disease impacts of testosterone in men and women.	Total testosterone levels	230,454 European ancestry women	NA	13q12.11	13	22115988	NR	LINC00540			ENSG00000276476			rs9552597-A	rs9552597	0	9552597	intron_variant	0	0.190986	5e-24	23.301		0.0354372	[0.028-0.042] unit increase	Affymetrix [16580851] (imputed)	N	testosterone measurement	http://www.ebi.ac.uk/efo/EFO_0004908	GCST90012112	Genome-wide genotyping array
2020-07-28	32450446	Wang H	2020-04-29	Neurobiol Aging	www.ncbi.nlm.nih.gov/pubmed/32450446	Genome-wide interaction analysis of pathological hallmarks in Alzheimer's disease.	Total PHF-tau (SNP x SNP interaction)	1,285 individuals	NA	13q12.11	13	21978665	NR x NR	No mapped genes x N/A - LINC00540						rs10737098-? x rs7992327-?	rs10737098 x rs7992327	0		intergenic_variant x intergenic_variant		NR	7e-08	7.1549				Affymetrix, Illumina [279409] (imputed)	N	PHF-tau measurement	http://www.ebi.ac.uk/efo/EFO_0010750	GCST010340	Genome-wide genotyping array
2018-10-18	30048462	Kim SK	2018-07-26	PLoS One	www.ncbi.nlm.nih.gov/pubmed/30048462	Identification of 613 new loci associated with heel bone mineral density and a polygenic risk score for bone mineral density, osteoporosis and fracture.	Heel bone mineral density	394,929 European ancestry individuals	NA	13q12.11	13	22069427		LINC00540			ENSG00000276476			rs9509989-?	rs9509989	0	9509989	intron_variant	0	NR	5e-11	10.301		0.0199538	[0.014-0.026] unit decrease	Affymetrix [20259828] (imputed)	N	heel bone mineral density	http://www.ebi.ac.uk/efo/EFO_0009270	GCST006433	Genome-wide genotyping array
2021-03-30	32778093	He B	2020-08-10	BMC Biol	www.ncbi.nlm.nih.gov/pubmed/32778093	Genome-wide pQTL analysis of protein expression regulatory networks in the human liver.	Protein quantitative trait loci (liver)	172 European ancestry individuals, 29 Black individuals, 86 individuals	NA	13q12.11	13	21988751	NR	NA - LINC00540		ENSG00000276476			52221	rs76759072-T	rs76759072	0	76759072	intergenic_variant	1	0.02265	2e-08	7.69897	(IARS2)	0.07699	NR unit decrease	Illumina [1671387] (imputed)	N	protein measurement	http://www.ebi.ac.uk/efo/EFO_0004747	GCST011427	Genome-wide genotyping array
2018-10-18	30048462	Kim SK	2018-07-26	PLoS One	www.ncbi.nlm.nih.gov/pubmed/30048462	Identification of 613 new loci associated with heel bone mineral density and a polygenic risk score for bone mineral density, osteoporosis and fracture.	Heel bone mineral density	394,929 European ancestry individuals	NA	13q12.11	13	22237801		LINC00540			ENSG00000276476			rs8002850-?	rs8002850	0	8002850	intron_variant	0	NR	5e-49	48.301		0.0313306	[0.027-0.036] unit increase	Affymetrix [20259828] (imputed)	N	heel bone mineral density	http://www.ebi.ac.uk/efo/EFO_0009270	GCST006433	Genome-wide genotyping array
2021-03-31	33627673	Gharahkhani P	2021-02-24	Nat Commun	www.ncbi.nlm.nih.gov/pubmed/33627673	Genome-wide meta-analysis identifies 127 open-angle glaucoma loci with consistent effect across ancestries.	Glaucoma (primary open-angle)	23,963 European ancestry cases, 306,942 European ancestry controls, 6,935 East Asian ancestry cases, 39,588 East Asian ancestry controls, 3,281 Sub-Saharan African ancestry cases, 2,791 Sub-Saharan African ancestry controls	43,254 European ancestry cases, 1,471,118 European ancestry controls	13q12.11	13	22099731	LINC00424, LINC00540	LINC00540			ENSG00000276476			rs4769194-A	rs4769194	0	4769194	intron_variant	0	NR	3e-13	12.5229		0.0672	unit increase	Illumina [15409056] (imputed)	N	open-angle glaucoma	http://www.ebi.ac.uk/efo/EFO_0004190	GCST90011770	Genome-wide genotyping array
2021-06-10	33226468	Foss-Skiftesvik J	2020-11-23	Childs Nerv Syst	www.ncbi.nlm.nih.gov/pubmed/33226468	Genome-wide association study across pediatric central nervous system tumors implicates shared predisposition and points to 1q25.2 (PAPPA2) and 11p12 (LRRC4C) as novel candidate susceptibility loci.	Pediatric central nervous system tumors (early onset)(pleiotropy)	326 European ancestry cases, 4,320 European ancestry controls	NA	13q12.11	13	22001059	NR	NA - LINC00540		ENSG00000276476			39913	rs17074792 -?	rs17074792	0	17074792	intergenic_variant	1	NR	2e-06	5.69897		1.73	1.38-2.16	Illumina [959859] (imputed)	N	central nervous system cancer	http://www.ebi.ac.uk/efo/EFO_0000326	GCST011831	Genome-wide genotyping array
2022-06-13	35192695	Haas CB	2022-02-22	Endocrinology	www.ncbi.nlm.nih.gov/pubmed/35192695	Cross-ancestry genome-wide association studies of sex hormone concentrations in pre- and postmenopausal women.	Testosterone levels	4,229 African ancestry individuals, 182,648 European ancestry individuals	NA	13q12.11	13	22115988		LINC00540			ENSG00000276476			rs9552597-?	rs9552597	0	9552597	intron_variant	0	NR	5e-13	12.301		7.233	z score increase	NR [NR] (imputed)	N	testosterone measurement	http://www.ebi.ac.uk/efo/EFO_0004908	GCST90104296	Genome-wide genotyping array
2022-06-13	35192695	Haas CB	2022-02-22	Endocrinology	www.ncbi.nlm.nih.gov/pubmed/35192695	Cross-ancestry genome-wide association studies of sex hormone concentrations in pre- and postmenopausal women.	Testosterone levels	182,648 European ancestry individuals	NA	13q12.11	13	22115988		LINC00540			ENSG00000276476			rs9552597-A	rs9552597	0	9552597	intron_variant	0	0.189265	3e-13	12.5229		0.0305992	[0.022-0.039] unit increase	NR [NR] (imputed)	N	testosterone measurement	http://www.ebi.ac.uk/efo/EFO_0004908	GCST90104272	Genome-wide genotyping array
2022-06-13	35192695	Haas CB	2022-02-22	Endocrinology	www.ncbi.nlm.nih.gov/pubmed/35192695	Cross-ancestry genome-wide association studies of sex hormone concentrations in pre- and postmenopausal women.	Testosterone levels in postmenopausal women	84,003 European ancestry individuals	NA	13q12.11	13	22115988		LINC00540			ENSG00000276476			rs9552597-A	rs9552597	0	9552597	intron_variant	0	0.189265	2e-08	7.69897		0.0347069	[0.023-0.047] unit increase	NR [NR] (imputed)	N	testosterone measurement	http://www.ebi.ac.uk/efo/EFO_0004908	GCST90104276	Genome-wide genotyping array
2021-12-14	34594039	Sakaue S	2021-09-30	Nat Genet	www.ncbi.nlm.nih.gov/pubmed/34594039	A cross-population atlas of genetic associations for 220 human phenotypes.	Glaucoma	10,411 European ancestry cases, 474,568 European ancestry controls, 8,448 East Asian ancestry cases, 168,903 East Asian ancestry controls	NA	13q12.11	13	22086519		LINC00540			ENSG00000276476			rs4770242-G	rs4770242	0	4770242	intron_variant	0	NR	3e-09	8.52288		0.0746	[0.05-0.099] unit decrease	Affymetrix, Illumina [25844939] (imputed)	N	glaucoma	http://www.ebi.ac.uk/efo/EFO_0000516	GCST90018852	Genome-wide genotyping array
2022-03-07	34910505	van der Meer D	2021-12-15	Sci Adv	www.ncbi.nlm.nih.gov/pubmed/34910505	The genetic architecture of human cortical folding.	Vertex-wise cortical surface area	33,748 European ancestry individuals	NA	13q12.11	13	22066973		LINC00540			ENSG00000276476			rs4770234-A	rs4770234	0	4770234	intron_variant	0	0.09	6e-10	9.22185		6.18	z score increase	Affymetrix [9061022] (imputed)	N	cortical surface area measurement	http://www.ebi.ac.uk/efo/EFO_0010736	GCST90095130	Genome-wide genotyping array
2021-12-15	34560273	Shadrin AA	2021-09-21	Neuroimage	www.ncbi.nlm.nih.gov/pubmed/34560273	Vertex-wise multivariate genome-wide association study identifies 780 unique genetic loci associated with cortical morphology.	Cortical surface area	35,657 White British ancestry individuals	NA	13q12.11	13	22066973	NR	LINC00540			ENSG00000276476			rs4770234-A	rs4770234	0	4770234	intron_variant	0	0.089	1e-10	10				NR [9056863] (imputed)	N	cortical surface area measurement	http://www.ebi.ac.uk/efo/EFO_0010736	GCST90091060	Genome-wide genotyping array
2021-06-09	33972514	Pazoki R	2021-05-10	Nat Commun	www.ncbi.nlm.nih.gov/pubmed/33972514	Genetic analysis in European ancestry individuals identifies 517 loci associated with liver enzymes.	Liver enzyme levels (alkaline phosphatase)	437,438 European ancestry individuals	315,572 European ancestry individuals	13q12.11	13	22236476	LINC00540	LINC00540			ENSG00000276476			rs7998010-A	rs7998010	0	7998010	intron_variant	0	0.664021	1e-10	10		0.00152134	[0.001-0.002] unit decrease	Affymetrix [13995440] (imputed)	N	alkaline phosphatase measurement	http://www.ebi.ac.uk/efo/EFO_0004533	GCST90013406	Genome-wide genotyping array
2022-03-07	34910505	van der Meer D	2021-12-15	Sci Adv	www.ncbi.nlm.nih.gov/pubmed/34910505	The genetic architecture of human cortical folding.	Vertex-wise sulcal depth	33,748 European ancestry individuals	NA	13q12.11	13	22066973		LINC00540			ENSG00000276476			rs4770234-A	rs4770234	0	4770234	intron_variant	0	0.09	8e-11	10.0969		6.5	z score increase	Affymetrix [9061022] (imputed)	N	brain measurement	http://www.ebi.ac.uk/efo/EFO_0004464	GCST90095129	Genome-wide genotyping array
2022-07-05	35668104	Cadby G	2022-06-06	Nat Commun	www.ncbi.nlm.nih.gov/pubmed/35668104	Comprehensive genetic analysis of the human lipidome identifies loci associated with lipid homeostasis with links to coronary artery disease.	Triacylglycerol (53:2) [NL-17:0] levels	4,492 European ancestry individuals	NA	13q12.11	13	22007128		LINC00424 - LINC00540	ENSG00000226722	ENSG00000276476		128872	33844	rs7321739-T	rs7321739	0	7321739	intergenic_variant	1	NR	2e-09	8.69897		0.608	[0.41-0.81] unit decrease	Illumina [13869437] (imputed)	N	triacylglycerol 53:2 measurement	http://www.ebi.ac.uk/efo/EFO_0021484	GCST90024561	Genome-wide genotyping array
2021-06-29	33462484	Sinnott-Armstrong N	2021-01-18	Nat Genet	www.ncbi.nlm.nih.gov/pubmed/33462484	Genetics of 35 blood and urine biomarkers in the UK Biobank.	Testosterone levels	310,461 European ancestry individuals, 5,453 African ancestry individuals, 6,680 South Asian ancestry individuals	NA	13q12.11	13	22115988	NR	LINC00540			ENSG00000276476			rs9552597-A	rs9552597	0	9552597	intron_variant	0	NR	3e-13	12.5229		0.0232	[0.017-0.029] unit increase	Affymetrix [9000000] (imputed)	N	testosterone measurement	http://www.ebi.ac.uk/efo/EFO_0004908	GCST90019520	Genome-wide genotyping array

## Sheet: Supplementary_Table_3
Analyzed regions in the mm10 reference genome
Chromosome	Start	End	Gene
1	1670000	5650000	Xkr4
1	2400000	6380000	Rp1
1	2490000	6470000	Sox17
1	2780000	6760000	Mrpl15
1	2800000	6780000	Lypla1
1	2850000	6830000	Tcea1
1	3010000	6990000	Rgs20
1	3080000	7060000	Atp6v1h
1	3580000	7560000	Oprk1
1	3910000	7890000	Npbwr1
1	4210000	8190000	Rb1cc1
1	4350000	8330000	Alkal1
1	4480000	8460000	St18
1	5080000	9060000	Pcmtd1
1	7290000	11270000	Sntg1
1	7540000	11520000	Adhfe1
1	7540000	11520000	Rrs1
1	7600000	11580000	3110035E14Rik
1	7630000	11610000	2610203C22Rik
1	7700000	11680000	Mybl1
1	7740000	11720000	1700034P13Rik
1	7740000	11720000	Vcpip1
1	7790000	11770000	Sgk3
1	7900000	11880000	Mcmdc2
1	7940000	11920000	Snhg6
1	7940000	11920000	Snord87
1	7960000	11940000	Tcf24
1	8000000	11980000	Ppp1r42
1	8030000	12010000	Cops5
1	8030000	12010000	Cspp1
1	8230000	12210000	Arfgef1
1	8710000	12690000	Cpa6
1	8860000	12840000	Mir467e
1	9260000	13240000	Prex2
1	9410000	13390000	A830018L16Rik
1	10420000	14400000	Mir6341
1	10660000	14640000	Gm17644
1	10690000	14670000	Sulf1
1	10990000	14970000	Slco5a1
1	11120000	15100000	Prdm14
1	11370000	15350000	Ncoa2
1	11580000	15560000	Tram1
1	11660000	15640000	Lactb2
1	11660000	15640000	Xkr9
1	11780000	15760000	Gm5523
1	12310000	16290000	Eya1
1	12750000	16730000	Msc
1	12910000	16890000	Trpa1
1	13310000	17290000	Kcnb2
1	13800000	17780000	Terf1
1	13890000	17870000	Sbspon
1	14090000	18070000	4930444P10Rik
1	14100000	18080000	Rdh10
1	14100000	18080000	Rpl7
1	14510000	18490000	Stau2
1	14610000	18590000	Ube2w
1	14650000	18630000	D030040B21Rik
1	14650000	18630000	Eloc
1	14660000	18640000	Tmem70
1	14680000	18660000	Ly96
1	15090000	19070000	Jph1
1	15140000	19120000	Gdap1
1	15600000	19580000	Pi15
1	15720000	19700000	Crispld1
1	16130000	20110000	Crisp4
1	16220000	20200000	Defb44-ps
1	16230000	20210000	Defb18
1	16260000	20240000	Defb41
1	17100000	21080000	Tfap2d
1	17200000	21180000	Tfap2b
1	18350000	22330000	4930486I03Rik
1	18610000	22590000	Pkhd1
1	18670000	22650000	Mir206
1	18680000	22660000	Mir133b
1	18730000	22710000	Il17a
1	18780000	22760000	Il17f
1	18820000	22800000	Mcm3
1	18890000	22870000	6720483E21Rik
1	18890000	22870000	Paqr8
1	18950000	22930000	Efhc1
1	19070000	23050000	Tram2
1	19210000	23190000	Tmem14a
1	19240000	23220000	Gsta3
1	19290000	23270000	Gm4956
1	19340000	23320000	Khdc1a
1	19360000	23340000	Khdc1c
1	19380000	23360000	Khdc1b
1	19960000	23940000	Kcnq5
1	20430000	24410000	Rims1
1	21100000	25080000	4933415F23Rik
1	21270000	25250000	Mir30a
1	21290000	25270000	Mir30c-2
1	21380000	25360000	Ogfrl1
1	21760000	25740000	B3gat2
1	21920000	25900000	Smap1
1	22000000	25980000	Sdhaf4
1	22100000	26080000	Fam135a
1	22190000	26170000	Col9a1
1	22580000	26560000	Col19a1
1	22670000	26650000	Lmbrd1
1	23270000	27250000	Gm20172
1	23820000	27800000	Adgrb3
1	24680000	28660000	4931408C20Rik
1	26780000	30760000	Gm597
1	27420000	31400000	Mir6342
1	28860000	32840000	Phf3
1	28940000	32920000	Gm13363
1	28940000	32920000	Ptp4a1
1	29170000	33150000	Lgsn
1	29220000	33200000	4931428L18Rik
1	29220000	33200000	Pih1d3
1	29260000	33240000	Gm4850
1	30170000	34150000	Khdrbs2
1	30520000	34500000	Gm9839
1	30540000	34520000	Gm5415
1	31660000	35640000	1700001G17Rik
1	31660000	35640000	Prim2
1	31710000	35690000	Rab23
1	31750000	35730000	Bag2
1	31810000	35790000	Zfp451
1	31830000	35810000	Gm15455
1	31900000	35880000	Bend6
1	32010000	35990000	Dst
1	32110000	36090000	Mir6896
1	32430000	36410000	Ccdc115
1	32430000	36410000	Imp4
1	32430000	36410000	Mir5103
1	32450000	36430000	Ptpn18
1	32490000	36470000	Prss39
1	32530000	36510000	Cfc1
1	32560000	36540000	Prss40
1	32570000	36550000	Amer3
1	32630000	36610000	AA619741
1	32800000	36780000	Arhgef4
1	32840000	36820000	Fam168b
1	32840000	36820000	Plekhb2
1	33520000	37500000	Mir7669
1	34060000	38040000	Hs6st1
1	34140000	38120000	Mir6897
1	34240000	38220000	Uggt1
1	34270000	38250000	Neurl3
1	34300000	38280000	Arid5a
1	34340000	38320000	Mir6898
1	34360000	38340000	Kansl3
1	34370000	38350000	Fer1l5
1	34440000	38420000	Lman2l
1	34470000	38450000	Cnnm4
1	34510000	38490000	Cnnm3
1	34530000	38510000	Ankrd23
1	34540000	38520000	Ankrd39
1	34550000	38530000	Sema4c
1	34590000	38570000	Fam178b
1	34690000	38670000	Cox5b
1	34700000	38680000	Actr1b
1	34710000	38690000	4933424G06Rik
1	34760000	38740000	Zap70
1	34930000	38910000	Tmem131
1	35210000	39190000	Cnga3
1	35290000	39270000	Inpp4a
1	35430000	39410000	Coa5
1	35430000	39410000	Unc50
1	35480000	39460000	4930594C11Rik
1	35540000	39520000	Mgat4a
1	35710000	39690000	2010300C02Rik
1	35850000	39830000	Tsga10
1	35870000	39850000	Lipt1
1	35890000	39870000	Mitd1
1	35890000	39870000	Mrpl30
1	35910000	39890000	Lyg2
1	35950000	39930000	Lyg1
1	35990000	39970000	Eif5b
1	35990000	39970000	Txndc9
1	36120000	40100000	Rev1
1	36620000	40600000	Aff3
1	36820000	40800000	Lonrf2
1	36890000	40870000	Chst10
1	36930000	40910000	Nms
1	36980000	40960000	Pdcl3
1	37180000	41160000	Mir6349
1	37190000	41170000	Npas2
1	37360000	41340000	Rpl31
1	37470000	41450000	Tbc1d8
1	37530000	41510000	Cnot11
1	37540000	41520000	Snord89
1	37570000	41550000	Rnf149
1	37650000	41630000	Creg2
1	37720000	41700000	Rfx8
1	37800000	41780000	Gm3646
1	37840000	41820000	1700066B17Rik
1	37900000	41880000	Map4k4
1	38080000	42060000	Gm16894
1	38080000	42060000	Il1r2
1	38220000	42200000	Il1r1
1	38320000	42300000	Il1rl2
1	38430000	42410000	Il1rl1
1	38460000	42440000	Il18r1
1	38510000	42490000	Il18rap
1	38580000	42560000	Slc9a4
1	38680000	42660000	Slc9a2
1	38790000	42770000	Mfsd9
1	38800000	42780000	Tmem182
1	39180000	43160000	4930448I06Rik
1	40690000	44670000	Pantr1
1	40690000	44670000	Pou3f3
1	40700000	44680000	2900092D14Rik
1	40710000	44690000	Pantr2
1	40850000	44830000	Mrps9
1	40950000	44930000	Gpr45
1	41090000	45070000	AI597479
1	41090000	45070000	Tgfbrap1
1	41160000	45140000	Fhl2
1	41440000	45420000	Nck2
1	41730000	45710000	1500015O10Rik
1	41820000	45800000	Uxs1
1	41930000	45910000	Tpp2
1	42020000	46000000	Mettl21c
1	42100000	46080000	Tex30
1	42110000	46090000	Bivm
1	42110000	46090000	Kdelc1
1	42140000	46120000	Ercc5
1	42210000	46190000	Mettl21e
1	42550000	46530000	Gulp1
1	42740000	46720000	4930521E06Rik
1	43310000	47290000	Col3a1
1	43500000	47480000	Col5a2
1	43790000	47770000	Wdr75
1	43920000	47900000	Slc40a1
1	44030000	48010000	Stk-ps2
1	44060000	48040000	Dnah7b
1	44850000	48830000	Slc39a10
1	45460000	49440000	Mir6350
1	48920000	52900000	Tmeff2
1	49280000	53260000	Cavin2
1	49330000	53310000	9330175M20Rik
1	49470000	53450000	Nabp1
1	49910000	53890000	Myo1b
1	50000000	53980000	Stat4
1	50110000	54090000	Stat1
1	50230000	54210000	Gls
1	50500000	54480000	Nab1
1	50630000	54610000	Nemp2
1	50720000	54700000	Mfsd6
1	50810000	54790000	Inpp1
1	50840000	54820000	Hibch
1	50950000	54930000	1700019D03Rik
1	51060000	55040000	Mstn
1	51180000	55160000	1700019A02Rik
1	51290000	55270000	Ormdl1
1	51290000	55270000	Pms1
1	51310000	55290000	Osgepl1
1	51350000	55330000	Asnsd1
1	51700000	55680000	Dnah7a
1	51780000	55760000	Stk17b
1	51840000	55820000	Mir7681
1	52190000	56170000	Hecw2
1	52250000	56230000	Ccdc150
1	52430000	56410000	Gtf3c3
1	52550000	56530000	Pgap1
1	52920000	56900000	Ankrd44
1	53020000	57000000	Sf3b1
1	53050000	57030000	Coq10b
1	53080000	57060000	Hspd1
1	53080000	57060000	Hspe1
1	53130000	57110000	Mob4
1	53220000	57200000	Rftn2
1	53230000	57210000	Mars2
1	53360000	57340000	Boll
1	53400000	57380000	Plcl1
1	53930000	57910000	9130227L01Rik
1	54630000	58610000	Hsfy2
1	54970000	58950000	9130024F11Rik
1	54970000	58950000	Satb2
1	55210000	59190000	BC055402
1	55370000	59350000	1700066M21Rik
1	55370000	59350000	4930558J18Rik
1	55400000	59380000	Maip1
1	55400000	59380000	Tyw5
1	55840000	59820000	Spats2l
1	55970000	59950000	Kctd18
1	55980000	59960000	Sgo2a
1	56020000	60000000	Aox1
1	56110000	60090000	Aox3
1	56210000	60190000	Aox4
1	56270000	60250000	Aox2
1	56390000	60370000	Bzw1
1	56420000	60400000	Clk1
1	56440000	60420000	Nif3l1
1	56440000	60420000	Ppil3
1	56500000	60480000	Orc2
1	56580000	60560000	Fam126b
1	56580000	60560000	Ndufb3
1	56650000	60630000	Gm20257
1	56690000	60670000	Als2cr12
1	56710000	60690000	Cflar
1	56800000	60780000	Casp8
1	56970000	60950000	Stradb
1	56970000	60950000	Trak2
1	57090000	61070000	Als2cr11
1	57120000	61100000	Tmem237
1	57160000	61140000	Mpp4
1	57230000	61210000	Als2
1	57250000	61230000	Cdk15
1	57480000	61460000	Fzd7
1	57510000	61490000	Gm973
1	57670000	61650000	Sumo1
1	57680000	61660000	Nop58
1	57690000	61670000	Snord70
1	57700000	61680000	Snord11
1	57760000	61740000	Bmpr2
1	57910000	61890000	Fam117b
1	58040000	62020000	Ica1l
1	58090000	62070000	Carf
1	58090000	62070000	Wdr12
1	58180000	62160000	Nbeal1
1	58340000	62320000	Cyp20a1
1	58400000	62380000	Abi2
1	58560000	62540000	Raph1
1	58740000	62720000	Cd28
1	58900000	62880000	Ctla4
1	58970000	62950000	Icos
1	59370000	63350000	9530026F06Rik
1	59630000	63610000	Pard3b
1	60700000	64680000	Nrp2
1	60790000	64770000	4930487H11Rik
1	61110000	65090000	Ino80d
1	61110000	65090000	Ino80dos
1	61170000	65150000	Eef1b2
1	61170000	65150000	Ndufs1
1	61170000	65150000	Snora41
1	61210000	65190000	Gpr1
1	61270000	65250000	Zdbf2
1	61440000	65420000	Adam23
1	61680000	65660000	Dytn
1	61730000	65710000	Fastkd2
1	61730000	65710000	Mdh1b
1	61760000	65740000	4933402D24Rik
1	61960000	65940000	Gm13749
1	61980000	65960000	Mir1958
1	62040000	66020000	Mir6899
1	62120000	66100000	Klf7
1	62530000	66510000	Creb1
1	62610000	66590000	Mettl21a
1	62690000	66670000	2810408I11Rik
1	62690000	66670000	Ccnyl1
1	62730000	66710000	Fzd5
1	62950000	66930000	Plekhm3
1	63030000	67010000	Akr1cl
1	63050000	67030000	Cryge
1	63060000	67040000	Crygd
1	63070000	67050000	Crygc
1	63080000	67060000	Crygb
1	63100000	67080000	Cryga
1	63120000	67100000	D630023F18Rik
1	63180000	67160000	Idh1
1	63180000	67160000	Pikfyve
1	63310000	67290000	Pth2r
1	63920000	67900000	Crygf
1	64170000	68150000	Map2
1	64460000	68440000	Unc80
1	64700000	68680000	Rpe
1	64810000	68790000	Kansl1l
1	64860000	68840000	Acadl
1	64930000	68910000	Myl1
1	65030000	69010000	Lancl1
1	65120000	69100000	Cps1
1	67100000	71080000	Erbb4
1	67680000	71660000	Ikzf2
1	67820000	71800000	Spag16
1	68720000	72700000	Vwc2l
1	69100000	73080000	Bard1
1	69410000	73390000	Abca12
1	69550000	73530000	Atic
1	69650000	73630000	Apol7d
1	69650000	73630000	Fn1
1	69880000	73860000	Gm8883
1	70000000	73980000	4933417E11Rik
1	70210000	74190000	Mreg
1	70280000	74260000	Pecr
1	70280000	74260000	Tmem169
1	70300000	74280000	Xrcc5
1	70530000	74510000	March4
1	70580000	74560000	Smarcal1
1	70700000	74680000	Ankar
1	70710000	74690000	Rpl37a
1	70820000	74800000	Igfbp2
1	70870000	74850000	Igfbp5
1	71010000	74990000	Tnp1
1	71020000	75000000	1700027A15Rik
1	71390000	75370000	D530049I02Rik
1	71400000	75380000	Pinc
1	71860000	75840000	6030407O03Rik
1	72120000	76100000	Rufy4
1	72120000	76100000	Tns1
1	72150000	76130000	Cxcr2
1	72190000	76170000	Cxcr1
1	72230000	76210000	Arpc2
1	72270000	76250000	Gpbar1
1	72280000	76260000	Aamp
1	72280000	76260000	Pnkd
1	72300000	76280000	Tmbim1
1	72360000	76340000	Catip
1	72370000	76350000	Slc11a1
1	72390000	76370000	Ctdsp1
1	72390000	76370000	Mir26b
1	72400000	76380000	Vil1
1	72500000	76480000	Cnot9
1	72540000	76520000	Plcd4
1	72540000	76520000	Usp37
1	72580000	76560000	Bcs1l
1	72580000	76560000	Zfp142
1	72600000	76580000	Rnf25
1	72600000	76580000	Stk36
1	72660000	76640000	Ttll4
1	72710000	76690000	Cyp27a1
1	72740000	76720000	Prkag3
1	72770000	76750000	Wnt6
1	72790000	76770000	Wnt10a
1	72850000	76830000	Cdk5r2
1	72880000	76860000	Fev
1	72890000	76870000	Cryba2
1	72900000	76880000	Mir375
1	72930000	76910000	Cfap65
1	72950000	76930000	Ihh
1	73040000	77020000	Nhej1
1	73130000	77110000	Slc23a3
1	73140000	77120000	Cnppd1
1	73140000	77120000	Retreg2
1	73160000	77140000	Zfand2b
1	73180000	77160000	Abcb6
1	73190000	77170000	Ankzf1
1	73190000	77170000	Atg9a
1	73210000	77190000	Glb1l
1	73210000	77190000	Stk16
1	73210000	77190000	Tuba4a
1	73220000	77200000	A630095N17Rik
1	73230000	77210000	Dnajb2
1	73260000	77240000	Ptprn
1	73270000	77250000	Resp18
1	73310000	77290000	Dnpep
1	73360000	77340000	Des
1	73370000	77350000	Gm15179
1	73370000	77350000	Speg
1	73430000	77410000	Gmppa
1	73450000	77430000	Asic4
1	73470000	77450000	Chpf
1	73470000	77450000	Tmem198
1	73500000	77480000	Inha
1	73500000	77480000	Obsl1
1	73520000	77500000	Stk11ip
1	73540000	77520000	Slc4a3
1	74480000	78460000	Gm17751
1	74500000	78480000	Mir6343
1	75490000	79470000	Mir6352
1	75510000	79490000	Epha4
1	76190000	80170000	Pax3
1	76310000	80290000	Sgpp2
1	76480000	80460000	Farsb
1	76510000	80490000	Mogat1
1	76650000	80630000	Acsl3
1	76650000	80630000	Utp14b
1	76810000	80790000	Kcne4
1	77440000	81420000	Scg2
1	77670000	81650000	Ap1s3
1	77760000	81740000	Wdfy1
1	77770000	81750000	Mrpl44
1	77850000	81830000	Serpine2
1	78210000	82190000	Fam124b
1	78340000	82320000	Cul3
1	78440000	82420000	1700016L21Rik
1	78750000	82730000	Dock10
1	79070000	83050000	Nyap2
1	80130000	84110000	Mir6344
1	80290000	84270000	Irs1
1	80310000	84290000	Rhbdd1
1	80580000	84560000	Col4a3
1	80580000	84560000	Col4a4
1	80720000	84700000	Mff
1	80760000	84740000	Tm4sf20
1	80830000	84810000	Agfg1
1	81030000	85010000	Slc19a3
1	81110000	85090000	Ccl20
1	81150000	85130000	Daw1
1	81400000	85380000	Sphkap
1	82210000	86190000	Mir6353
1	82280000	86260000	Pid1
1	82690000	86670000	Dner
1	82690000	86670000	Mir5126
1	82830000	86810000	Fbxo36
1	82830000	86810000	Trip12
1	82930000	86910000	Slc16a14
1	83100000	87080000	A530032D15Rik
1	83190000	87170000	Gm7609
1	83270000	87250000	C130026I21Rik
1	83590000	87570000	Sp110
1	83600000	87580000	Sp140
1	83650000	87630000	Sp100
1	83730000	87710000	A630001G21Rik
1	83750000	87730000	Mir8096
1	83770000	87750000	9930111H07Rik
1	83790000	87770000	Cab39
1	83890000	87870000	Itm2c
1	83920000	87900000	4933407L21Rik
1	83960000	87940000	Gpr55
1	84020000	88000000	Spata3
1	84040000	88020000	2810459M11Rik
1	84060000	88040000	Psmd1
1	84110000	88090000	Htr2b
1	84150000	88130000	Armc9
1	84300000	88280000	B3gnt7
1	84350000	88330000	C130036L24Rik
1	84350000	88330000	Gm24148
1	84350000	88330000	Ncl
1	84350000	88330000	Snora75
1	84350000	88330000	Snord82
1	84380000	88360000	Nmur1
1	84420000	88400000	Tex44
1	84520000	88500000	Ptma
1	84580000	88560000	Cops7b
1	84580000	88560000	Pde6d
1	84670000	88650000	Nppc
1	84700000	88680000	Dis3l2
1	85080000	89060000	Alppl2
1	85100000	89080000	Alpi
1	85120000	89100000	Akp3
1	85150000	89130000	Ecel1
1	85180000	89160000	Prss56
1	85190000	89170000	Chrnd
1	85200000	89180000	Chrng
1	85210000	89190000	Eif4e2
1	85260000	89240000	Efhd1
1	85320000	89300000	Gigyf2
1	85390000	89370000	Kcnj13
1	85470000	89450000	3110079O15Rik
1	85570000	89550000	Ngef
1	85590000	89570000	Neu2
1	85620000	89600000	Inpp5d
1	85750000	89730000	Atg16l1
1	85780000	89760000	Scarna6
1	85800000	89780000	Sag
1	85850000	89830000	Dgkd
1	86000000	89980000	Usp40
1	86050000	90030000	Ugt1a10
1	86070000	90050000	Ugt1a9
1	86090000	90070000	Ugt1a7c
1	86100000	90080000	Ugt1a6b
1	86130000	90110000	Ugt1a6a
1	86160000	90140000	Ugt1a5
1	86200000	90180000	Dnajb3
1	86200000	90180000	Ugt1a2
1	86210000	90190000	Ugt1a1
1	86220000	90200000	Mroh2a
1	86260000	90240000	6430706D22Rik
1	86270000	90250000	A730008H23Rik
1	86270000	90250000	Hjurp
1	86300000	90280000	Trpm8
1	86400000	90380000	Spp2
1	86510000	90490000	Glrp1
1	86550000	90530000	Gm19589
1	86700000	90680000	Arl4c
1	86750000	90730000	Platr5
1	87010000	90990000	1700067G17Rik
1	87070000	91050000	Sh3bp4
1	87400000	91380000	C030007H22Rik
1	87450000	91430000	Agap1
1	87680000	91660000	4933400F21Rik
1	87930000	91910000	Gbx2
1	88010000	91990000	Asb18
1	88150000	92130000	Iqca
1	88200000	92180000	Ackr3
1	88600000	92580000	Cops8
1	88840000	92820000	Col6a3
1	88910000	92890000	Mlph
1	88950000	92930000	Prlh
1	88960000	92940000	Rab17
1	89050000	93030000	Lrrfip1
1	89140000	93120000	Rbm44
1	89170000	93150000	Ramp1
1	89250000	93230000	Ube2f
1	89290000	93270000	Scly
1	89320000	93300000	Espnl
1	89350000	93330000	Klhl30
1	89360000	93340000	Erfe
1	89390000	93370000	Ilkap
1	89400000	93380000	1700020N18Rik
1	89410000	93390000	Hes6
1	89450000	93430000	Per2
1	89490000	93470000	Traf3ip1
1	89540000	93520000	Asb1
1	89800000	93780000	Twist2
1	90140000	94120000	Hdac4
1	90460000	94440000	Mir6900
1	90470000	94450000	Ndufa10
1	90480000	94460000	Olfr1416
1	90490000	94470000	Olfr1415
1	90510000	94490000	Olfr1414
1	90570000	94550000	Olfr1413
1	90580000	94560000	Olfr1412
1	90590000	94570000	Olfr1411
1	90600000	94580000	Olfr1410
1	90610000	94590000	Olfr12
1	90640000	94620000	Cops9
1	90640000	94620000	Otos
1	90830000	94810000	Gpc1
1	90850000	94830000	Mir149
1	90900000	94880000	Ankmy1
1	90900000	94880000	Dusp28
1	90910000	94890000	Rnpepl1
1	90930000	94910000	Capn10
1	90950000	94930000	9430060I03Rik
1	90970000	94950000	Gpr35
1	91000000	94980000	Aqp12
1	91080000	95060000	Kif1a
1	91130000	95110000	Agxt
1	91160000	95140000	2310007B03Rik
1	91230000	95210000	Sned1
1	91270000	95250000	Mir6901
1	91300000	95280000	Mterf4
1	91340000	95320000	Mir6902
1	91340000	95320000	Pask
1	91340000	95320000	Ppp1r7
1	91350000	95330000	Mir6345
1	91370000	95350000	Ano7
1	91470000	95450000	Hdlbp
1	91470000	95450000	Sept2
1	91510000	95490000	Farp2
1	91630000	95610000	Stk25
1	91680000	95660000	Bok
1	91750000	95730000	Atg4b
1	91750000	95730000	Thap4
1	91800000	95780000	Dtymk
1	91800000	95780000	Ing5
1	91820000	95800000	D2hgdh
1	91860000	95840000	Gal3st2
1	91910000	95890000	Gal3st2b
1	91990000	95970000	Gal3st2c
1	92020000	96000000	Neu4
1	92050000	96030000	Pdcd1
1	92790000	96770000	4930440C22Rik
1	93310000	97290000	Fam174a
1	93660000	97640000	St8sia4
1	93710000	97690000	4930598F16Rik
1	94020000	98000000	1700063A18Rik
1	94660000	98640000	4930533P14Rik
1	94870000	98850000	Slco4c1
1	94990000	98970000	Slco6b1
1	95120000	99100000	Slco6c1
1	95660000	99640000	D1Ertd622e
1	95770000	99750000	Gin1
1	95770000	99750000	Ppip5k2
1	96040000	100020000	B230216N24Rik
1	96090000	100070000	Pam
1	96130000	100110000	1810006J02Rik
1	96420000	100400000	Slco6d1
1	97770000	101750000	Cntnap5b
1	99150000	103130000	Gm20268
1	102760000	106740000	Cdh20
1	103350000	107330000	Rnf152
1	103660000	107640000	2310035C23Rik
1	103660000	107640000	Pign
1	103780000	107760000	Tnfrsf11a
1	103990000	107970000	Zcchc2
1	104170000	108150000	Gm20753
1	104170000	108150000	Phlpp1
1	104710000	108690000	Bcl2
1	104750000	108730000	Kdsr
1	104790000	108770000	Vps4b
1	104860000	108840000	Serpinb5
1	104930000	108910000	Serpinb12
1	104980000	108960000	Serpinb13
1	105050000	109030000	Serpinb3a
1	105080000	109060000	Serpinb3d
1	105160000	109140000	Serpinb3b
1	105270000	109250000	Serpinb3c
1	105360000	109340000	Serpinb11
1	105420000	109400000	Serpinb7
1	105510000	109490000	Serpinb2
1	105520000	109500000	Serpinb10
1	105590000	109570000	Serpinb8
1	105910000	109890000	D830032E09Rik
1	107980000	111960000	Cdh7
1	108970000	112950000	Cdh19
1	109860000	113840000	Dsel
1	113680000	117660000	Cntnap5a
1	116310000	120290000	Tsn
1	116320000	120300000	Nifk
1	116380000	120360000	Clasp1
1	116450000	120430000	2900060B14Rik
1	116620000	120600000	Tfcp2l1
1	117050000	121030000	Gli2
1	117420000	121400000	Inhbb
1	117500000	121480000	Ralb
1	117520000	121500000	Tmem185b
1	117640000	121620000	Epb41l5
1	117830000	121810000	Ptpn4
1	117910000	121890000	Tmem177
1	117990000	121970000	Cfap221
1	118000000	121980000	Sctr
1	118070000	122050000	Tmem37
1	118120000	122100000	3110009E18Rik
1	118120000	122100000	Dbi
1	118260000	122240000	Steap3
1	118340000	122320000	C1ql2
1	118500000	122480000	Marco
1	118600000	122580000	En1
1	119080000	123060000	Celrr
1	119320000	123300000	Insig2
1	119430000	123410000	Ccdc93
1	119520000	123500000	Htr5b
1	119560000	123540000	Ddx18
1	122040000	126020000	Dpp10
1	123430000	127410000	Actr3
1	123560000	127540000	Slc35f5
1	123670000	127650000	Gpr39
1	123910000	127890000	Lypd1
1	124490000	128470000	Nckap5
1	125200000	129180000	Mgat5
1	125670000	129650000	Tmem163
1	125720000	129700000	Acmsd
1	125770000	129750000	2900009J06Rik
1	125770000	129750000	Ccnt2
1	125840000	129820000	Map3k19
1	125860000	129840000	Rab3gap1
1	126100000	130080000	R3hdm1
1	126100000	130080000	Zranb3
1	126200000	130180000	Mir128-1
1	126240000	130220000	Ubxn4
1	126320000	130300000	Lct
1	126350000	130330000	Mcm6
1	126410000	130390000	Dars
1	126590000	130570000	Cxcr4
1	127270000	131250000	Thsd7b
1	128420000	132400000	Cd55b
1	128460000	132440000	Cd55
1	128620000	132600000	Zp3r
1	128660000	132640000	C4bp
1	128680000	132660000	C4bp-ps1
1	128710000	132690000	Yod1
1	128720000	132700000	Pfkfb2
1	128730000	132710000	AA986860
1	128800000	132780000	Fcamr
1	128820000	132800000	Pigr
1	128860000	132840000	Fcmr
1	128880000	132860000	Il24
1	128910000	132890000	Il20
1	128930000	132910000	Il19
1	129010000	132990000	Il10
1	129090000	133070000	Mapkapk2
1	129130000	133110000	Dyrk3
1	129150000	133130000	Eif2d
1	129240000	133220000	Rassf5
1	129270000	133250000	Ikbke
1	129520000	133500000	Fam72a
1	129520000	133500000	Srgap2
1	129590000	133570000	Avpr1b
1	129630000	133610000	Ctse
1	129680000	133660000	Rab7b
1	129740000	133720000	Slc26a9
1	129790000	133770000	Pm20d1
1	129820000	133800000	Slc41a1
1	129860000	133840000	Rab29
1	129910000	133890000	Nucks1
1	129970000	133950000	Slc45a3
1	130000000	133980000	Elk4
1	130060000	134040000	Mfsd4a
1	130130000	134110000	Cdk18
1	130190000	134170000	Lemd1
1	130190000	134170000	Mir135b
1	130290000	134270000	Klhdc8a
1	130310000	134290000	Nuak2
1	130390000	134370000	Tmcc2
1	130410000	134390000	Dstyk
1	130470000	134450000	Rbbp5
1	130500000	134480000	Tmem81
1	130540000	134520000	Cntn2
1	130720000	134700000	Gm10538
1	130740000	134720000	Nfasc
1	130880000	134860000	Lrrn2
1	131020000	135000000	Mdm4
1	131040000	135020000	Pik3c2b
1	131130000	135110000	Ppp1r15b
1	131240000	135220000	Plekha6
1	131260000	135240000	Gm19461
1	131300000	135280000	Golt1a
1	131320000	135300000	Kiss1
1	131350000	135330000	Ren1
1	131350000	135330000	Ren2
1	131360000	135340000	Etnk2
1	131420000	135400000	Sox13
1	131610000	135590000	Snrpe
1	131660000	135640000	Zbed6
1	131660000	135640000	Zc3h11a
1	131690000	135670000	Lax1
1	131720000	135700000	Mir6903
1	131750000	135730000	Atp2b4
1	131900000	135880000	Optc
1	131920000	135900000	Prelp
1	132030000	136010000	Fmod
1	132070000	136050000	Btg2
1	132110000	136090000	Chit1
1	132180000	136160000	Chil1
1	132190000	136170000	Mybph
1	132230000	136210000	Adora1
1	132290000	136270000	Myog
1	132330000	136310000	Ppfia4
1	132360000	136340000	Tmem183a
1	132380000	136360000	4933406M09Rik
1	132400000	136380000	Cyb5r1
1	132410000	136390000	Adipor1
1	132450000	136430000	Klhl12
1	132490000	136470000	Rabif
1	132540000	136520000	Mgat4e
1	132560000	136540000	Kdm5b
1	132640000	136620000	Syt2
1	132950000	136930000	Ppp1r12b
1	132960000	136940000	Ube2t
1	133100000	137080000	Lgr6
1	133130000	137110000	Ptpn7
1	133130000	137110000	Ptprv
1	133140000	137120000	Arl8a
1	133160000	137140000	Gpr37l1
1	133250000	137230000	Elf3
1	133280000	137260000	Rnpep
1	133310000	137290000	Timm17a
1	133320000	137300000	Lmod1
1	133370000	137350000	Shisa4
1	133430000	137410000	Ipo9
1	133450000	137430000	Mir1231
1	133580000	137560000	Nav1
1	133720000	137700000	Csrp1
1	133760000	137740000	Phlda3
1	133790000	137770000	Tnni1
1	133810000	137790000	Lad1
1	133830000	137810000	Tnnt2
1	133910000	137890000	Pkp1
1	134000000	137980000	Igfn1
1	134010000	137990000	Tmem9
1	134050000	138030000	Ascl5
1	134050000	138030000	Cacna1s
1	134130000	138110000	Gm15850
1	134130000	138110000	Kif21b
1	134230000	138210000	5730559C18Rik
1	134260000	138240000	Gpr25
1	134340000	138320000	Camsap2
1	134410000	138390000	9230116N13Rik
1	134410000	138390000	Ddx59
1	134460000	138440000	Kif14
1	134620000	138600000	Zfp281
1	134680000	138660000	Gm19705
1	134690000	138670000	Platr22
1	134960000	138940000	Nr5a2
1	135960000	139940000	Mir181a-1
1	135960000	139940000	Mir181b-1
1	136170000	140150000	Ptprc
1	136270000	140250000	Atp6v1g3
1	136610000	140590000	Nek7
1	136680000	140660000	Gm5833
1	136840000	140820000	Lhx9
1	136850000	140830000	2310009B15Rik
1	136960000	140940000	Dennd1b
1	136970000	140950000	4930596I21Rik
1	137370000	141350000	4933436E23Rik
1	137370000	141350000	Crb1
1	137420000	141400000	Zbtb41
1	137450000	141430000	Aspm
1	137500000	141480000	F13b
1	137560000	141540000	Cfhr1
1	137780000	141760000	Gm4788
1	137850000	141830000	Cfhr2
1	138180000	142160000	Cfh
1	138240000	142220000	Kcnt2
1	138650000	142630000	4930590L20Rik
1	141640000	145620000	B3galt2
1	141700000	145680000	Cdc73
1	141730000	145710000	Glrx2
1	141770000	145750000	Trove2
1	141770000	145750000	Uchl5
1	142000000	145980000	Rgs2
1	142170000	146150000	Rgs13
1	142240000	146220000	Rgs1
1	142560000	146540000	Rgs21
1	142770000	146750000	Rgs18
1	144490000	148470000	Brinp3
1	147960000	151940000	Pla2g4a
1	148050000	152030000	Mir7652
1	148090000	152070000	Ptgs2os
1	148100000	152080000	Ptgs2
1	148160000	152140000	Ptgs2os2
1	148310000	152290000	Pdc
1	148340000	152320000	2310030A07Rik
1	148390000	152370000	BC003331
1	148390000	152370000	Tpr
1	148460000	152440000	Prg4
1	148990000	152970000	Hmcn1
1	149130000	153110000	C730036E19Rik
1	149340000	153320000	Ivns1abp
1	149420000	153400000	Swt1
1	149420000	153400000	Trmt1l
1	149440000	153420000	Mir7682
1	149500000	153480000	Rnf2
1	149570000	153550000	Fam129a
1	149750000	153730000	Edem3
1	150090000	154070000	1700025G04Rik
1	150380000	154360000	Tsen15
1	150390000	154370000	Colgalt2
1	150620000	154600000	Rgl1
1	150750000	154730000	Apobec4
1	150760000	154740000	Arpc5
1	150800000	154780000	Ncf2
1	150870000	154850000	Smg7
1	150950000	154930000	Nmnat2
1	151180000	155160000	Lamc2
1	151330000	155310000	Lamc1
1	151410000	155390000	E330020D12Rik
1	151420000	155400000	Shcbp1l
1	151480000	155460000	Dhx9
1	151540000	155520000	Npl
1	151650000	155630000	Rgs8
1	151730000	155710000	C230024C17Rik
1	151740000	155720000	Rgs16
1	151740000	155720000	Rnasel
1	151840000	155820000	Rgsl1
1	151850000	155830000	Teddm2
1	151870000	155850000	Teddm1b
1	151890000	155870000	Glul
1	151890000	155870000	Mir8114
1	151890000	155870000	Teddm1a
1	152200000	156180000	Zfp648
1	152250000	156230000	4930452N14Rik
1	152250000	156230000	4930532M18Rik
1	152720000	156700000	Cacna1e
1	153090000	157070000	Ier5
1	153140000	157120000	Mr1
1	153150000	157130000	Stx6
1	153410000	157390000	Xpr1
1	153550000	157530000	Acbd6
1	153740000	157720000	Lhx4
1	153810000	157790000	Qsox1
1	153970000	157950000	Cep350
1	154030000	158010000	Tor1aip1
1	154030000	158010000	Tor1aip2
1	154200000	158180000	Fam163a
1	154300000	158280000	Tdrd5
1	154310000	158290000	Nphs2
1	154470000	158450000	Soat1
1	154550000	158530000	Abl2
1	154670000	158650000	Tor3a
1	154710000	158690000	Fam20b
1	154830000	158810000	Angptl1
1	154930000	158910000	Ralgps2
1	155100000	159080000	Tex35
1	155410000	159390000	2810025M15Rik
1	155410000	159390000	Rasal2
1	155450000	159430000	Cryzl2
1	155500000	159480000	Sec16b
1	156350000	160330000	Brinp2
1	156360000	160340000	Astn1
1	156500000	160480000	Mir488
1	156950000	160930000	Pappa2
1	157230000	161210000	Cop1
1	157340000	161320000	Mir1843b
1	157340000	161320000	Scarna3a
1	157520000	161500000	Tnr
1	158040000	162020000	4930523C07Rik
1	158070000	162050000	4930562F07Rik
1	158150000	162130000	Tnn
1	158190000	162170000	Mrps14
1	158210000	162190000	Cacybp
1	158570000	162550000	Gpr52
1	158790000	162770000	Rabgap1l
1	158900000	162880000	Rc3h1
1	158970000	162950000	Serpinc1
1	159030000	163010000	Gas5
1	159030000	163010000	Snord47
1	159030000	163010000	Zbtb37
1	159070000	163050000	Cenpl
1	159070000	163050000	Dars2
1	159130000	163110000	Klhl20
1	159140000	163120000	Ankrd45
1	159150000	163130000	Tex50
1	159250000	163230000	Prdx6
1	159390000	163370000	Tnfsf4
1	159490000	163470000	Tnfsf18
1	159780000	163760000	Fasl
1	159870000	163850000	Suco
1	159960000	163940000	Pigc
1	159970000	163950000	4930558K02Rik
1	160000000	163980000	2810442N19Rik
1	160210000	164190000	Dnm3os
1	160210000	164190000	Mir199a-2
1	160220000	164200000	Mir214
1	160470000	164450000	Dnm3
1	160540000	164520000	Mettl13
1	160570000	164550000	Vamp4
1	160630000	164610000	Myoc
1	160650000	164630000	Myocos
1	160740000	164720000	Prrc2c
1	160810000	164790000	Fmo4
1	160860000	164840000	Fmo1
1	160890000	164870000	Fmo2
1	160930000	164910000	Fmo6
1	160980000	164960000	Fmo3
1	161080000	165060000	Mroh9
1	161310000	165290000	Prrx1
1	161400000	165380000	Gorab
1	161720000	165700000	Mettl11b
1	161770000	165750000	Kifap3
1	161920000	165900000	Scyl3
1	161990000	165970000	BC055324
1	161990000	165970000	Mettl18
1	162040000	166020000	Sele
1	162060000	166040000	Sell
1	162110000	166090000	Selp
1	162150000	166130000	F5
1	162150000	166130000	Gm16548
1	162240000	166220000	Slc19a2
1	162270000	166250000	Ccdc181
1	162300000	166280000	Blzf1
1	162300000	166280000	Nme7
1	162450000	166430000	Atp1b1
1	162790000	166770000	Dpt
1	162860000	166840000	Gm20743
1	162930000	166910000	Xcl1
1	163090000	167070000	4930568G15Rik
1	163160000	167140000	Tbx19
1	163190000	167170000	Sft2d2
1	163230000	167210000	Tiprl
1	163290000	167270000	Gpr161
1	163460000	167440000	Dcaf6
1	163460000	167440000	Mpc2
1	163480000	167460000	Adcy10
1	163630000	167610000	Mpzl1
1	163700000	167680000	Rcsd1
1	163760000	167740000	Creg1
1	163780000	167760000	Cd247
1	164000000	167980000	Pou2f1
1	164120000	168100000	Dusp27
1	164130000	168110000	Gpa33
1	164230000	168210000	Mael
1	164250000	168230000	Ildr2
1	164370000	168350000	Tada1
1	164400000	168380000	Pogk
1	164490000	168470000	Gm4846
1	164640000	168620000	Gm4847
1	164680000	168660000	Fmo9
1	164990000	168970000	Gm16701
1	165000000	168980000	Fam78b
1	165280000	169260000	Uck2
1	165300000	169280000	Tmco1
1	165340000	169320000	Aldh9a1
1	165390000	169370000	Mgst3
1	165460000	169440000	Lrrc52
1	165590000	169570000	Rxrg
1	165680000	169660000	Lmx1a
1	166430000	170410000	Pbx1
1	166490000	170470000	Mir6348
1	167530000	171510000	Nuf2
1	167650000	171630000	Rgs5
1	167740000	171720000	Rgs4
1	167920000	171900000	Ccdc190
1	167960000	171940000	3110045C21Rik
1	167960000	171940000	Hsd17b7
1	168080000	172060000	Ddr2
1	168170000	172150000	Uap1
1	168210000	172190000	Uhmk1
1	168230000	172210000	Sh2d1b2
1	168270000	172250000	Sh2d1b1
1	168300000	172280000	Gm7694
1	168300000	172280000	Spata46
1	168550000	172530000	Nos1ap
1	168640000	172620000	Olfml2b
1	168860000	172840000	Atf6
1	168880000	172860000	Dusp12
1	168910000	172890000	Fcrlb
1	168920000	172900000	Fcrla
1	168970000	172950000	Fcgr2b
1	169010000	172990000	Fcgr4
1	169050000	173030000	Fcgr3
1	169060000	173040000	Mir6546
1	169120000	173100000	Cfap126
1	169150000	173130000	Mpz
1	169150000	173130000	Sdhc
1	169190000	173170000	Pcp4l1
1	169210000	173190000	Nr1i3
1	169220000	173200000	Apoa2
1	169220000	173200000	Tomm40l
1	169230000	173210000	Fcer1g
1	169240000	173220000	Ndufs2
1	169250000	173230000	Adamts4
1	169270000	173250000	B4galt3
1	169280000	173260000	Ppox
1	169280000	173260000	Usp21
1	169290000	173270000	Ufc1
1	169320000	173300000	Dedd
1	169340000	173320000	Nit1
1	169340000	173320000	Pfdn2
1	169360000	173340000	Klhdc9
1	169370000	173350000	Nectin4
1	169380000	173360000	Arhgap30
1	169410000	173390000	Tstd1
1	169410000	173390000	Usf1
1	169430000	173410000	F11r
1	169500000	173480000	Alyref2
1	169530000	173510000	Itln1
1	169550000	173530000	Cd244
1	169600000	173580000	Ly9
1	169650000	173630000	Slamf7
1	169680000	173660000	Cd48
1	169760000	173740000	Slamf1
1	169830000	173810000	Cd84
1	169910000	173890000	Slamf6
1	170020000	174000000	Vangl2
1	170050000	174030000	Nhlh1
1	170080000	174060000	Copa
1	170080000	174060000	Ncstn
1	170120000	174100000	Pex19
1	170140000	174120000	Dcaf8
1	170200000	174180000	Pea15a
1	170210000	174190000	Casq1
1	170250000	174230000	Atp1a4
1	170290000	174270000	Atp1a2
1	170310000	174290000	Igsf8
1	170320000	174300000	Kcnj9
1	170340000	174320000	Kcnj10
1	170370000	174350000	Pigm
1	170470000	174450000	Slamf9
1	170480000	174460000	Igsf9
1	170500000	174480000	Tagln2
1	170520000	174500000	Cfap45
1	170550000	174530000	4933439K11Rik
1	170550000	174530000	Vsig8
1	170590000	174570000	Slamf8
1	170600000	174580000	Fcrl6
1	170630000	174610000	Dusp23
1	170690000	174670000	Crp
1	170890000	174870000	Apcs
1	170950000	174930000	Olfr16
1	171130000	175110000	Olfr1408
1	171180000	175160000	Olfr1406
1	171200000	175180000	Olfr218
1	171210000	175190000	Olfr1404
1	171220000	175200000	Fcer1a
1	171270000	175250000	Mptx2
1	171270000	175250000	Olfr418
1	171330000	175310000	Ackr1
1	171360000	175340000	Cadm3
1	171420000	175400000	Aim2
1	171530000	175510000	Ifi214
1	171590000	175570000	Ifi213
1	171630000	175610000	Ifi209
1	171670000	175650000	Ifi208
1	171740000	175720000	Ifi207
1	171760000	175740000	Ifi204
1	171880000	175860000	Mndal
1	171910000	175890000	Ifi211
1	171940000	175920000	Ifi203
1	171980000	175960000	Ifi202b
1	172030000	176010000	Ifi205
1	172040000	176020000	Olfr433
1	172050000	176030000	Olfr432
1	172060000	176040000	Olfr430
1	172080000	176060000	Olfr429
1	172090000	176070000	Olfr426
1	172090000	176070000	Olfr427
1	172110000	176090000	Olfr231
1	172130000	176110000	Olfr424
1	172150000	176130000	Olfr420
1	172150000	176130000	Olfr421-ps1
1	172170000	176150000	Spta1
1	172250000	176230000	Olfr419
1	172330000	176310000	Mptx1
1	172360000	176340000	Olfr417
1	172390000	176370000	Olfr248
1	172430000	176410000	Olfr414
1	172440000	176420000	Olfr220
1	172500000	176480000	Fmn2
1	172920000	176900000	Grem2
1	173490000	177470000	Rgs7
1	173620000	177600000	Fh1
1	173630000	177610000	Kmo
1	173680000	177660000	Chml
1	173690000	177670000	Opn3
1	173690000	177670000	Wdr64
1	173880000	177860000	Exo1
1	173920000	177900000	Becn2
1	174210000	178190000	Pld5
1	174770000	178750000	Mir350
1	174800000	178780000	Cep170
1	174810000	178790000	Sdccag8
1	174830000	178810000	Hmga2-ps1
1	175240000	179220000	Akt3
1	175440000	179420000	Zbtb18
1	175640000	179620000	2310043L19Rik
1	175720000	179700000	1700016C15Rik
1	175790000	179770000	Adss
1	175990000	179970000	Gm16432
1	176180000	180160000	Desi2
1	176310000	180290000	Cox20
1	176330000	180310000	Hnrnpu
1	176400000	180380000	Efcab2
1	176520000	180500000	Kif26b
1	177510000	181490000	Smyd3
1	177540000	181520000	Cnst
1	177540000	181520000	Tfb2m
1	177660000	181640000	Sccpdh
1	177800000	181780000	Ahctf1
1	177960000	181940000	Cdc42bpa
1	178190000	182170000	Coq8a
1	178250000	182230000	Psen2
1	178330000	182310000	Gm5069
1	178330000	182310000	Itpkb
1	178480000	182460000	Stum
1	178560000	182540000	Parp1
1	178580000	182560000	Mir6904
1	178640000	182620000	Lin9
1	178690000	182670000	Mixl1
1	178720000	182700000	Acbd3
1	178810000	182790000	H3f3a
1	178850000	182830000	Sde2
1	178890000	182870000	Lefty2
1	178900000	182880000	Pycr2
1	178930000	182910000	Lefty1
1	178940000	182920000	Tmem63a
1	179010000	182990000	Ephx1
1	179050000	183030000	9130409I23Rik
1	179140000	183120000	Nvl
1	179150000	183130000	Cnih4
1	179210000	183190000	Wdr26
1	179350000	183330000	Cnih3
1	179510000	183490000	Ccdc121
1	179840000	183820000	Lbr
1	180010000	183990000	Enah
1	180120000	184100000	Srp9
1	180150000	184130000	Vmn1r1
1	180280000	184260000	Degs1
1	180300000	184280000	1700047M11Rik
1	180340000	184320000	Fbxo28
1	180400000	184380000	Trp53bp2
1	180510000	184490000	Capn2
1	180560000	184540000	Capn8
1	180740000	184720000	Ccdc185
1	180760000	184740000	Susd4
1	180950000	184930000	Tlr5
1	181220000	185200000	Disp1
1	181290000	185270000	Aida
1	181290000	185270000	Brox
1	181360000	185340000	Mia3
1	181380000	185360000	Taf1a
1	181410000	185390000	Hhipl2
1	182030000	186010000	1700056E22Rik
1	182030000	186010000	Dusp10
1	182550000	186530000	1700112H15Rik
1	182710000	186690000	4930488B22Rik
1	182730000	186710000	Hlx
1	182810000	186790000	Marc1
1	182820000	186800000	Mir1981
1	182840000	186820000	Marc2
1	182880000	186860000	C130074G19Rik
1	182990000	186970000	Mark1
1	183200000	187180000	Rab3gap2
1	183240000	187220000	Mir664
1	183240000	187220000	Snora36b
1	183310000	187290000	Mir194-1
1	183310000	187290000	Mir215
1	183320000	187300000	Iars2
1	183330000	187310000	Bpnt1
1	183360000	187340000	Eprs
1	183440000	187420000	9630028B13Rik
1	183450000	187430000	Gm2061
1	183450000	187430000	Slc30a10
1	183490000	187470000	5033404E19Rik
1	183530000	187510000	Mir297c
1	184110000	188090000	Lyplal1
1	184700000	188680000	Tgfb2
1	184740000	188720000	Rrp15
1	184960000	188940000	D1Pas1
1	185120000	189100000	1700007P06Rik
1	185210000	189190000	Gpatch2
1	185210000	189190000	Spata17
1	185600000	189580000	Esrrg
1	186000000	189980000	9330162B11Rik
1	186260000	190240000	Ush2a
1	187000000	190980000	Kctd3
1	187340000	191320000	Kcnk2
1	187680000	191660000	Cenpf
1	187720000	191700000	Ptpn14
1	187920000	191900000	Smyd2
1	188170000	192150000	Prox1
1	188910000	192890000	Rps6kc1
1	188920000	192900000	Angel2
1	188970000	192950000	Vash2
1	189020000	193000000	A230020J21Rik
1	189020000	193000000	Flvcr1
1	189030000	193010000	Spata45
1	189060000	193040000	Nsl1
1	189060000	193040000	Tatdn3
1	189090000	193070000	Batf3
1	189160000	193140000	Fam71a
1	189180000	193160000	Atf3
1	189310000	193290000	Nenf
1	189320000	193300000	Tmem206
1	189390000	193370000	Ppp2r5a
1	189570000	193550000	Dtl
1	189570000	193550000	Ints7
1	189710000	193690000	Lpgat1
1	189820000	193800000	Nek2
1	189900000	193880000	1700034H15Rik
1	189900000	193880000	Slc30a1
1	189970000	193950000	Rd3
1	189990000	193970000	Mir3473c
1	190090000	194070000	Traf5
1	190130000	194110000	Gm10516
1	190130000	194110000	Rcor3
1	190190000	194170000	Kcnh1
1	190770000	194750000	Hhat
1	190840000	194820000	1700065J18Rik
1	190850000	194830000	Sertad4
1	191030000	195010000	Syt14
1	191130000	195110000	Diexf
1	191150000	195130000	Irf6
1	191170000	195150000	A130010J15Rik
1	191200000	195180000	Traf3ip3
1	191240000	195220000	Hsd11b1
1	191270000	195250000	G0s2
1	191300000	195280000	Lamb3
1	191370000	195350000	Camk1g
1	191500000	195480000	Mir205
1	192220000	196200000	4930503O07Rik
1	192610000	196590000	Plxna2
1	192930000	196910000	Cd34
1	192970000	196950000	Gm16897
1	193010000	196990000	A330023F24Rik
1	193030000	197010000	Mir29b-2
1	193030000	197010000	Mir29c
1	193090000	197070000	Cd46
1	193130000	197110000	Cr1l
1	193170000	197150000	Cr2
2	1110000	5090000	Fam171a1
2	1280000	5260000	Nmt2
2	1330000	5310000	Acbd7
2	1330000	5310000	Rpp38
2	1360000	5340000	Olah
2	1420000	5400000	Dclre1c
2	1420000	5400000	Meig1
2	1470000	5450000	Suv39h2
2	1510000	5490000	Cdnf
2	1510000	5490000	Hspa14
2	1520000	5500000	Mir466b-2
2	1520000	5500000	Mir466b-3
2	1710000	5690000	Fam107b
2	2140000	6120000	1700080N15Rik
2	2150000	6130000	Frmd4a
2	2650000	6630000	Prpf18
2	2710000	6690000	Bend7
2	2880000	6860000	Sephs1
2	2910000	6890000	Phyh
2	2970000	6950000	Ucma
2	3010000	6990000	Mcm10
2	3060000	7040000	Optn
2	3130000	7110000	Ccdc3
2	3370000	7350000	Mir466d
2	3670000	7650000	Camk1d
2	3840000	7820000	Cdc123
2	3840000	7820000	Nudt5
2	3890000	7870000	Sec61a2
2	3940000	7920000	Dhtkd1
2	3950000	7930000	Upf2
2	4130000	8110000	Gm10857
2	4130000	8110000	Proser2
2	4190000	8170000	A230108P19Rik
2	4210000	8190000	Echdc3
2	4350000	8330000	Usp6nl
2	4920000	8900000	5031426D15Rik
2	5390000	9370000	Celf2
2	7180000	11160000	1700061F12Rik
2	7870000	11850000	Gata3
2	7880000	11860000	4930412O13Rik
2	7880000	11860000	9230102O04Rik
2	8040000	12020000	Taf3
2	8080000	12060000	Atp5c1
2	8080000	12060000	Kin
2	8130000	12110000	Itih2
2	8150000	12130000	Itih5
2	8370000	12350000	Sfmbt2
2	8470000	12450000	Mir297a-3
2	8470000	12450000	Mir297a-4
2	8470000	12450000	Mir467a-1
2	8470000	12450000	Mir467a-2
2	8470000	12450000	Mir467a-4
2	8470000	12450000	Mir467a-5
2	8470000	12450000	Mir467a-7
2	8470000	12450000	Mir467a-8
2	8470000	12450000	Mir467a-9
2	8470000	12450000	Mir669a-3
2	8470000	12450000	Mir669g
2	8470000	12450000	Mir669j
2	8470000	12450000	Mir669k
2	8480000	12460000	Mir467b
2	8500000	12480000	Mir467d
2	8510000	12490000	Mir297b
2	8510000	12490000	Mir669a-2
2	8510000	12490000	Mir669i
2	9170000	13150000	Prkcq
2	9330000	13310000	Gm13293
2	9390000	13370000	8030442B05Rik
2	9550000	13530000	Pfkfb3
2	9600000	13580000	Rbm17
2	9640000	13620000	Il2ra
2	9700000	13680000	Il15ra
2	9770000	13750000	Ankrd16
2	9770000	13750000	Fbxo18
2	10300000	14280000	E030013I19Rik
2	10300000	14280000	Itga8
2	10410000	14390000	Mindy3
2	10920000	14900000	Pter
2	11010000	14990000	C1ql3
2	11270000	15250000	Rsu1
2	11490000	15470000	Cubn
2	11540000	15520000	Trdmt1
2	11570000	15550000	Vim
2	11790000	15770000	St8sia6
2	12050000	16030000	Hacd1
2	12070000	16050000	Stam
2	12070000	16050000	Stamos
2	12170000	16150000	Tmem236
2	12220000	16200000	Mrc1
2	12260000	16240000	Mir511
2	12380000	16360000	Slc39a12
2	12600000	16580000	Cacnb2
2	12720000	16700000	Gm13315
2	13050000	17030000	Arl5b
2	13050000	17030000	Nsun6
2	14350000	18330000	Plxdc2
2	15010000	18990000	4930515L03Rik
2	15560000	19540000	Mir6419
2	15730000	19710000	Nebl
2	15990000	19970000	H2al2a
2	16020000	20000000	Gm17762
2	16030000	20010000	A930004D18Rik
2	16040000	20020000	Skida1
2	16050000	20030000	Mir7655
2	16060000	20040000	Mllt10
2	16390000	20370000	Dnajc1
2	16670000	20650000	Bmi1
2	16670000	20650000	Commd3
2	16690000	20670000	Spag6
2	16990000	20970000	4930426L09Rik
2	16990000	20970000	Pip4k2a
2	17190000	21170000	Armc3
2	17370000	21350000	Msrb2
2	17440000	21420000	Ptf1a
2	17550000	21530000	4921504E06Rik
2	17650000	21630000	Gm3230
2	17650000	21630000	Otud1
2	18280000	22260000	Etl4
2	18960000	22940000	Arhgap21
2	18960000	22940000	Gm13375
2	19200000	23180000	Enkur
2	19200000	23180000	Thnsl1
2	19360000	23340000	Gpr158
2	20220000	24200000	Myo3a
2	20620000	24600000	Gad2
2	20650000	24630000	Mir3967
2	20770000	24750000	Apbb1ip
2	20890000	24870000	Pdss1
2	21040000	25020000	Abi1
2	21060000	25040000	Acbd5
2	21150000	25130000	Mastl
2	21150000	25130000	Yme1l1
2	21200000	25180000	4931423N10Rik
2	21320000	25300000	Nxph2
2	21570000	25550000	Spopl
2	22040000	26020000	Hnmt
2	22090000	26070000	Tbpl2
2	22150000	26130000	Il1f8
2	22180000	26160000	Il1f9
2	22210000	26190000	Il1f6
2	22270000	26250000	Il1f5
2	22290000	26270000	Il1f10
2	22340000	26320000	Il1rn
2	22380000	26360000	Psd4
2	22470000	26450000	Pax8
2	22760000	26740000	Cacna1b
2	22910000	26890000	Ehmt1
2	22930000	26910000	Arrdc1
2	22940000	26920000	Zmynd19
2	22960000	26940000	Dph7
2	22970000	26950000	Mrpl41
2	22970000	26950000	Pnpla7
2	23050000	27030000	Nsmf
2	23080000	27060000	Entpd8
2	23090000	27070000	Noxa1
2	23180000	27160000	Nrarp
2	23190000	27170000	Tor4a
2	23210000	27190000	Fam166a
2	23210000	27190000	Nelfb
2	23210000	27190000	Stpg3
2	23220000	27200000	Tubb4b
2	23230000	27210000	Cysrt1
2	23230000	27210000	Rnf224
2	23230000	27210000	Slc34a3
2	23240000	27220000	Rnf208
2	23250000	27230000	Ndor1
2	23250000	27230000	Tmem203
2	23260000	27240000	Tprn
2	23270000	27250000	Anapc2
2	23270000	27250000	Ssna1
2	23280000	27260000	Lrrc26
2	23280000	27260000	Tmem210
2	23290000	27270000	Grin1os
2	23310000	27290000	Grin1
2	23330000	27310000	AA543186
2	23330000	27310000	Man1b1
2	23350000	27330000	Dpp7
2	23360000	27340000	Uap1l1
2	23370000	27350000	Sapcd2
2	23390000	27370000	Entpd2
2	23400000	27380000	Npdc1
2	23420000	27400000	Abca2
2	23420000	27400000	Fut7
2	23440000	27420000	Mir3087
2	23450000	27430000	Clic3
2	23460000	27440000	Paxx
2	23460000	27440000	Ptgds
2	23490000	27470000	Lcn12
2	23500000	27480000	C8g
2	23500000	27480000	Fbxw5
2	23540000	27520000	Traf2
2	23550000	27530000	Edf1
2	23570000	27550000	Mamdc4
2	23570000	27550000	Phpt1
2	23580000	27560000	Gm996
2	23600000	27580000	Rabl6
2	23610000	27590000	Ccdc183
2	23620000	27600000	Fcna
2	23620000	27600000	Tmem141
2	23650000	27630000	Lcn5
2	23650000	27630000	Lcn8
2	23670000	27650000	Lcn6
2	23680000	27660000	Lcn10
2	23700000	27680000	Bmyc
2	23700000	27680000	Obp2a
2	23730000	27710000	Obp2b
2	23760000	27740000	Lcn3
2	23770000	27750000	Lcn11
2	23780000	27760000	Gm13539
2	23810000	27790000	Glt6d1
2	23820000	27800000	Lcn9
2	23840000	27820000	Sohlh1
2	23860000	27840000	Kcnt1
2	23980000	27960000	Camsap1
2	24020000	28000000	Ubac1
2	24090000	28070000	Nacc2
2	24130000	28110000	Tmem250-ps
2	24200000	28180000	Lhx3
2	24230000	28210000	Qsox2
2	24290000	28270000	Ccdc187
2	24310000	28290000	Gpsm1
2	24350000	28330000	Card9
2	24350000	28330000	Dnlz
2	24380000	28360000	Pmpca
2	24380000	28360000	Sdccag3
2	24380000	28360000	Snapc4
2	24400000	28380000	Inpp5e
2	24440000	28420000	Sec16a
2	24470000	28450000	Mir6996
2	24500000	28480000	Notch1
2	24580000	28560000	Egfl7
2	24590000	28570000	Mir126a
2	24590000	28570000	Mir126b
2	24600000	28580000	Agpat2
2	24620000	28600000	Fam69b
2	24630000	28610000	Snora17
2	24630000	28610000	Snora43
2	24640000	28620000	Snhg7
2	24670000	28650000	Lcn4
2	24860000	28840000	Abo
2	24900000	28880000	Surf6
2	24910000	28890000	Med22
2	24910000	28890000	Rpl7a
2	24910000	28890000	Surf1
2	24910000	28890000	Surf2
2	24930000	28910000	Stkld1
2	24930000	28910000	Surf4
2	24960000	28940000	Rexo4
2	24970000	28950000	Adamts13
2	25000000	28980000	Cacfd1
2	25020000	29000000	Slc2a6
2	25060000	29040000	Mymk
2	25070000	29050000	Adamtsl2
2	25140000	29120000	Fam163b
2	25160000	29140000	Dbh
2	25160000	29140000	Dbhos
2	25240000	29220000	Sardh
2	25420000	29400000	Vav2
2	25450000	29430000	Mir7578
2	25470000	29450000	Brd3
2	25510000	29490000	Wdr5
2	25670000	29650000	Rxra
2	25880000	29860000	Col5a1
2	26080000	30060000	Fcnb
2	26200000	30180000	Olfm1
2	26440000	30420000	Ppp1r26
2	26460000	30440000	1700007K13Rik
2	26460000	30440000	Mrps2
2	26490000	30470000	Gbgt1
2	26510000	30490000	Ralgds
2	26560000	30540000	Cel
2	26580000	30560000	Gtf3c5
2	26620000	30600000	Gfi1b
2	26640000	30620000	Tsc1
2	26690000	30670000	Spaca9
2	26700000	30680000	Ak8
2	26730000	30710000	Mir3088
2	26840000	30820000	Ddx31
2	26840000	30820000	Gtf3c4
2	26910000	30890000	Barhl1
2	27050000	31030000	Cfap77
2	27060000	31040000	Ttf1
2	27120000	31100000	Setx
2	27240000	31220000	Ntng2
2	27250000	31230000	6530402F18Rik
2	27340000	31320000	Med27
2	27470000	31450000	Mir133c
2	27610000	31590000	Rapgef1
2	27760000	31740000	Gm13547
2	27780000	31760000	Coq4
2	27780000	31760000	Trub2
2	27800000	31780000	Slc27a4
2	27820000	31800000	Urm1
2	27840000	31820000	Mir219a-2
2	27840000	31820000	Mir219b
2	27860000	31840000	Cercam
2	27880000	31860000	Odf2
2	27930000	31910000	Gle1
2	27960000	31940000	Sptan1
2	27990000	31970000	Mir6997
2	28040000	32020000	Wdr34
2	28060000	32040000	Set
2	28070000	32050000	Pkn3
2	28090000	32070000	Zdhhc12
2	28120000	32100000	Zer1
2	28130000	32110000	Tbc1d13
2	28170000	32150000	Endog
2	28170000	32150000	Spout1
2	28200000	32180000	Kyat1
2	28230000	32210000	1700084E18Rik
2	28230000	32210000	Lrrc8a
2	28260000	32240000	Phyhd1
2	28280000	32260000	Dolk
2	28280000	32260000	Nup188
2	28350000	32330000	Sh3glb2
2	28360000	32340000	Miga2
2	28390000	32370000	Dolpp1
2	28410000	32390000	Crat
2	28410000	32390000	Ptpa
2	28470000	32450000	Ier5l
2	28590000	32570000	Cstad
2	28720000	32700000	Mir3089
2	28800000	32780000	1700001O22Rik
2	28800000	32780000	Ntmt1
2	28820000	32800000	Asb6
2	28840000	32820000	Prrx2
2	28900000	32880000	Ptges
2	28950000	32930000	Tor1b
2	28960000	32940000	Tor1a
2	28980000	32960000	BC005624
2	28980000	32960000	Usp20
2	29140000	33120000	Fnbp1
2	29150000	33130000	D330023K18Rik
2	29150000	33130000	Gpr107
2	29240000	33220000	Ncs1
2	29470000	33450000	Ass1
2	29470000	33450000	Gm5424
2	29570000	33550000	Fubp3
2	29610000	33590000	Mir6998
2	29640000	33620000	Prdm12
2	29670000	33650000	Exosc2
2	29680000	33660000	Abl1
2	29810000	33790000	Qrfp
2	29840000	33820000	Fibcd1
2	29880000	33860000	Lamc3
2	29950000	33930000	Aif1l
2	29970000	33950000	Nup214
2	30050000	34030000	Mir7674
2	30080000	34060000	Fam78a
2	30090000	34070000	Plpp7
2	30150000	34130000	Prrc2b
2	30230000	34210000	Pomt1
2	30260000	34240000	Uck1
2	30280000	34260000	Golga2
2	30280000	34260000	Swi5
2	30310000	34290000	Mir199b
2	30350000	34330000	Dnm1
2	30360000	34340000	Ciz1
2	30380000	34360000	1110008P14Rik
2	30380000	34360000	Lcn2
2	30390000	34370000	Ptges2
2	30450000	34430000	Naif1
2	30450000	34430000	Slc25a25
2	30530000	34510000	Fam102a
2	30570000	34550000	Dpm2
2	30570000	34550000	Pip5kl1
2	30580000	34560000	St6galnac4
2	30600000	34580000	St6galnac6
2	30620000	34600000	Ak1
2	30640000	34620000	Eng
2	30680000	34660000	Mir8093
2	30690000	34670000	Fpgs
2	30710000	34690000	Cdk9
2	30710000	34690000	Mir2861
2	30710000	34690000	Mir3960
2	30720000	34700000	Sh2d3c
2	30740000	34720000	6330409D20Rik
2	30750000	34730000	Tor2a
2	30770000	34750000	Ptrh1
2	30770000	34750000	Snord14a
2	30770000	34750000	Ttc16
2	30780000	34760000	Cfap157
2	30840000	34820000	Stxbp1
2	30870000	34850000	Fam129b
2	30960000	34940000	Lrsam1
2	30960000	34940000	Rpl12
2	30960000	34940000	Snora65
2	30980000	34960000	Slc2a8
2	31080000	35060000	Garnl3
2	31210000	35190000	Angptl2
2	31370000	35350000	Ralgps1
2	31430000	35410000	Zbtb34
2	31460000	35440000	Zbtb43
2	31640000	35620000	C130021I20Rik
2	31640000	35620000	Lmx1b
2	31800000	35780000	Nron
2	31880000	35860000	Mvb12b
2	32370000	36350000	Pbx3
2	32400000	36380000	Mapkap1
2	32750000	36730000	Gapvd1
2	32770000	36750000	Hspa5
2	32790000	36770000	Rabepk
2	32820000	36800000	Fbxw2
2	32870000	36850000	Cutal
2	32870000	36850000	Psmd5
2	32910000	36890000	Phf19
2	32960000	36940000	Traf1
2	33060000	37040000	Hc
2	33100000	37080000	AI182371
2	33100000	37080000	Cntrl
2	33200000	37180000	Rab14
2	33250000	37230000	Gsn
2	33330000	37310000	Stom
2	33360000	37340000	4930568D16Rik
2	33390000	37370000	4930402F06Rik
2	33460000	37440000	Ggta1
2	33550000	37530000	Gm13446
2	33620000	37600000	Dab2ip
2	33810000	37790000	9030204H09Rik
2	33970000	37950000	Ttll11
2	34040000	38020000	Morn5
2	34040000	38020000	Ndufa8
2	34100000	38080000	Lhx6
2	34130000	38110000	Mrrf
2	34130000	38110000	Rbm18
2	34230000	38210000	Ptgs1
2	34370000	38350000	Olfr338
2	34380000	38360000	Mir684-1
2	34420000	38400000	Olfr339
2	34450000	38430000	Olfr340
2	34480000	38460000	Olfr341
2	34520000	38500000	Olfr342
2	34560000	38540000	Olfr344
2	34640000	38620000	Olfr345
2	34680000	38660000	Olfr346
2	34730000	38710000	Olfr347
2	34780000	38760000	Olfr348
2	34790000	38770000	Olfr50
2	34810000	38790000	Olfr3
2	34850000	38830000	Olfr350
2	34860000	38840000	Olfr351
2	34860000	38840000	Olfr352
2	34890000	38870000	Olfr353
2	34900000	38880000	Olfr354
2	34920000	38900000	Olfr355
2	34930000	38910000	Olfr356
2	34990000	38970000	Olfr357
2	35000000	38980000	Olfr358
2	35060000	39040000	Olfr360
2	35080000	39060000	Olfr361
2	35100000	39080000	Olfr362
2	35200000	39180000	Olfr365
2	35210000	39190000	Olfr366
2	35260000	39240000	Olfr367-ps
2	35330000	39310000	Olfr368
2	35350000	39330000	Pdcl
2	35400000	39380000	Snord90
2	35420000	39400000	Rc3h2
2	35430000	39410000	Zbtb6
2	35440000	39420000	Zbtb26
2	35450000	39430000	Rabgap1
2	35510000	39490000	Gpr21
2	35640000	39620000	Strbp
2	35770000	39750000	Crb2
2	36280000	40260000	Dennd1a
2	36350000	40330000	Lhx2
2	36510000	40490000	Nek6
2	36640000	40620000	Psmb7
2	36710000	40690000	Nr5a1
2	36850000	40830000	Mir181a-2
2	36850000	40830000	Mir181b-2
2	36920000	40900000	Nr6a1
2	36930000	40910000	Olfml2a
2	36990000	40970000	Wdr38
2	37000000	40980000	Arpc5l
2	37000000	40980000	Rpl35
2	37060000	41040000	Golga1
2	37160000	41140000	Gm16523
2	37190000	41170000	Scai
2	37220000	41200000	Ppp6c
2	40440000	44420000	Mir6336
2	40650000	44630000	Lrp1b
2	41550000	45530000	Kynu
2	41740000	45720000	Arhgap15
2	42060000	46040000	Arhgap15os
2	42860000	46840000	Gtdc1
2	43020000	47000000	Mir5129
2	43110000	47090000	Zeb2
2	43110000	47090000	Zeb2os
2	43690000	47670000	1700019E08Rik
2	46810000	50790000	Acvr2a
2	46940000	50920000	Mbd5
2	46940000	50920000	Orc4
2	47450000	51430000	Epc2
2	47610000	51590000	Kif5c
2	47780000	51760000	Lypd6b
2	48060000	52040000	Lypd6
2	48290000	52270000	Gm13483
2	48290000	52270000	Mmadhc
2	48900000	52880000	Gm13498
2	49140000	53120000	Rnd3
2	49240000	53220000	Gm13497
2	49620000	53600000	Tas2r134
2	49730000	53710000	Gm13490
2	49930000	53910000	Rbm43
2	49970000	53950000	Nmi
2	50030000	54010000	Tnfaip6
2	50070000	54050000	Rif1
2	50290000	54270000	4930573O16Rik
2	50330000	54310000	Neb
2	50420000	54400000	Arl5a
2	50670000	54650000	Cacnb4
2	50740000	54720000	Stam2
2	50850000	54830000	Fmnl2
2	51190000	55170000	Arl6ip6
2	51190000	55170000	Prpf40a
2	52080000	56060000	Rprm
2	52430000	56410000	Galnt13
2	53430000	57410000	Kcnj3
2	54780000	58760000	Mir195b
2	55110000	59090000	Nr4a2
2	55180000	59160000	4930555B11Rik
2	55180000	59160000	BB557941
2	55230000	59210000	Gpd2
2	55990000	59970000	Galnt5
2	56050000	60030000	Ermn
2	56160000	60140000	Cytip
2	56160000	60140000	Gm13546
2	56270000	60250000	Gm13544
2	56350000	60330000	Acvr1c
2	56560000	60540000	Acvr1
2	56560000	60540000	Upp2
2	57010000	60990000	Ccdc148
2	57160000	61140000	Pkp4
2	57380000	61360000	5330411J11Rik
2	57480000	61460000	Dapl1
2	57610000	61590000	Tanc1
2	57880000	61860000	Wdsub1
2	58120000	62100000	Baz2b
2	58200000	62180000	March7
2	58280000	62260000	Cd302
2	58380000	62360000	Ly75
2	58410000	62390000	Gm13580
2	58550000	62530000	Pla2r1
2	58720000	62700000	Itgb6
2	58880000	62860000	Rbms1
2	58970000	62950000	Gm13582
2	59590000	63570000	Tank
2	59710000	63690000	Psmd14
2	59800000	63780000	Tbr1
2	60040000	64020000	Slc4a10
2	60410000	64390000	Dpp4
2	60480000	64460000	Gcg
2	60570000	64550000	Fap
2	60640000	64620000	Ifih1
2	60660000	64640000	Gca
2	61180000	65160000	Kcnh7
2	62090000	66070000	Fign
2	63020000	67000000	Grb14
2	63230000	67210000	Cobll1
2	63360000	67340000	Mir6337
2	63360000	67340000	Slc38a11
2	63560000	67540000	Scn3a
2	63670000	67650000	Scn2a
2	63840000	67820000	Csrnp3
2	64120000	68100000	Galnt3
2	64250000	68230000	Ttc21b
2	64440000	68420000	Gm13629
2	64440000	68420000	Scn1a
2	64630000	68610000	Scn9a
2	64780000	68760000	Scn7a
2	65170000	69150000	Gm1322
2	65440000	69420000	Xirp2
2	65670000	69650000	Mir7224
2	65780000	69760000	Mir6335
2	66100000	70080000	B3galt1
2	66470000	70450000	Stk39
2	66580000	70560000	4933409G03Rik
2	66650000	70630000	4932414N04Rik
2	66860000	70840000	Cers6
2	67130000	71110000	Nostrin
2	67200000	71180000	Spc25
2	67210000	71190000	G6pc2
2	67340000	71320000	Abcb11
2	67380000	71360000	Dhrs9
2	67580000	71560000	Lrp2
2	67640000	71620000	Bbs5
2	67670000	71650000	Klhl41
2	67710000	71690000	Fastkd1
2	67720000	71700000	Ppig
2	67780000	71760000	Ccdc173
2	67780000	71760000	Phospho2
2	67820000	71800000	Klhl23
2	67860000	71840000	Ssb
2	67880000	71860000	Mettl5
2	67890000	71870000	Ubr3
2	68030000	72010000	Myo3b
2	68470000	72450000	Sp5
2	68500000	72480000	Erich2
2	68560000	72540000	Gad1
2	68560000	72540000	Gad1os
2	68660000	72640000	Gorasp2
2	68820000	72800000	Tlk1
2	69050000	73030000	Dcaf17
2	69050000	73030000	Mettl8
2	69110000	73090000	Cybrd1
2	69210000	73190000	Dync1i2
2	69360000	73340000	Slc25a12
2	69380000	73360000	Hat1
2	69450000	73430000	Metap1d
2	69520000	73500000	Dlx1
2	69530000	73510000	Dlx1as
2	69540000	73520000	Dlx2
2	69710000	73690000	Platr26
2	69780000	73760000	Itga6
2	69870000	73850000	Pdk1
2	70050000	74030000	Rapgef4
2	70280000	74260000	Map3k20
2	70470000	74450000	Cdca7
2	70700000	74680000	8430437L04Rik
2	70810000	74790000	6430710C18Rik
2	70970000	74950000	Sp3os
2	70980000	74960000	Sp3
2	71210000	75190000	Ola1
2	71270000	75250000	Sp9
2	71310000	75290000	Cir1
2	71310000	75290000	Scrn3
2	71380000	75360000	Gpr155
2	71480000	75460000	Wipf1
2	71580000	75560000	Chrna1
2	71590000	75570000	Chn1os3
2	71770000	75750000	Chn1
2	71890000	75870000	Atf2
2	71910000	75890000	Atp5g3
2	72300000	76280000	4930441J16Rik
2	72570000	76550000	Lnpk
2	72650000	76630000	Evx2
2	72660000	76640000	Hoxd13
2	72670000	76650000	Hoxd12
2	72680000	76660000	Hoxd11
2	72690000	76670000	Hoxd10
2	72690000	76670000	Hoxd9
2	72700000	76680000	Hoxd8
2	72710000	76690000	Hoxd3
2	72710000	76690000	Hoxd3os1
2	72720000	76700000	Hoxd4
2	72720000	76700000	Mir10b
2	72750000	76730000	LOC102634401
2	72760000	76740000	Haglr
2	72760000	76740000	Hoxd1
2	72820000	76800000	Mtx2
2	73440000	77420000	9430019J16Rik
2	73650000	77630000	Gm6793
2	73650000	77630000	Hnrnpa3
2	73700000	77680000	Nfe2l2
2	73830000	77810000	Agps
2	73930000	77910000	Ttc30b
2	73970000	77950000	Ttc30a2
2	73980000	77960000	Ttc30a1
2	74330000	78310000	Pde11a
2	74360000	78340000	Cyct
2	74360000	78340000	Rbm45
[truncated: 22,029 more rows]

## Sheet: Supplementary_Table_4
sgRNA name	sgRNA sequence (5'-3')	Description
Fgf9_bin230	GGCTCCGATAAGATCTGAGC	used in ∆306
Fgf9_bin240	TAACCAATTTTGACGGCCGT	used in ∆93
Fgf9_bin250	GGCCTGTCTAGCAACGAGAT	used in ∆93 and ∆104
Fgf9_bin259	TGAGTGCAGCTTTCATCGTA	used in ∆306 and ∆104
Meis1_KO_5'	GACGTAAAGCCGGCGGGTT	used in Meis1 KO
Meis1_KO_3'	GGTTGGCTCTACTCAGTAA	used in Meis1 KO
genotyping PCR primers	Primer sequence (5'-3')	Description
Fgf9_bin230_genoF	TTCCTAGTGGCTTCCCCCTG	Genotyping of bin 230
Fgf9_bin230_genoR	GGGGCTGAAATTAGACAGCAC	(used in ∆306)
Fgf9_bin240_genoF	ACTGCGAGGCCAAAAATAAGC	Genotyping of bin 240
Fgf9_bin240_genoR	GCTCCATTGTGGCCAATCTT	(used in ∆93)
Fgf9_bin250_genoF	ATCTCCATGACAGGTTCAAAAGTC	Genotyping of bin 250
Fgf9_bin250_genoR	CCTGCTTTCTACCATTTGGGGT	(used in ∆93 and ∆104)
Fgf9_bin259_genoF	ACTGACCTCTCTTAGAAGGATGC	Genotyping of bin 259
Fgf9_bin259_genoR	ACAGGACATCCACCTACTTGC	(used in ∆306 and ∆104)
Meis1_5'_genoF	GACTCTCGAGCGGAACCTTT	Genotyping of 5' breakpoint of Meis1
Meis1_5'_genoR	AGTGGTGGCCATAACAGGTC
Meis1_3'_genoF	AAGCCCACAGTCAGCCTTTT	Genotyping of 3' breakpoint of Meis1
Meis1_3'_genoR	GTGTCAGAAACAAGGCCCCA
qPCR Primers for the deletion	Primer sequence (5'-3')
∆93_qPCR1_F	TGGACTGGCAGCTCTTTGAG
∆93_qPCR1_R	TGGGGTGCGAACATGAGAAA
∆93_qPCR2_F	TCATCCAGGCTCAATCTGCC
∆93_qPCR2_R	CAGGCTCAGGTCAAGTCACA
∆93_qPCR3_F	GGACCTTGGGGTACAACCTG
∆93_qPCR3_R	GACTGCTTGGTGCTACCCAT
∆104_qPCR1_F	GGACCCCAGCTCTTAGAACG
∆104_qPCR1_R	AGGAAGGGTCAGTGTGGTCT
∆104_qPCR2_F	CTGTGTTTGCGACGATGTCC
∆104_qPCR2_R	AAAGCCGTGACACTAAGGGG
∆104_qPCR3_F	CAGACAGCCATCGGCACTAA
∆104_qPCR3_R	TAGCACCCACTGGTCGAAAG
∆306_qPCR1_F	TTTGTTCCCGAGAGGTGTGC
∆306_qPCR1_R	CAATGTTTCCACATGGCGCA
∆306_qPCR2_F	ATTCTGGGCAGAGGGAAAGC
∆306_qPCR2_R	GTGGCTTGAATTGGCACCTG
∆306_qPCR3_F	CCAGGCAGGAGCAATGGTTA
∆306_qPCR3_R	CTGGCATCTGAGTCCTCACC
Meis1_qPCR1_F	CAGGGCTTACTGTGTTCCGT
Meis1_qPCR1_R	TTCCCCCTCAAATCGTCAGC
Meis1_qPCR2_F	TCTGCACTCGCATCAGTACC
Meis1_qPCR2_R	ATCGCGCCTCACTCCTTAAC

## Sheet: Supplementary_Table_5
Light microscopy reporting table
Hardware
Instrument and Camera	Confocal Leica SPE microscope; Laser Scanning Confocal Microscopy (LSCM); Scanhead RGBV
Resolution	20x oil
Filters and Light Sources	Laser lines: 405nm, 488 nm, 532 nm.
Quality Control
Is this the first report of the instrument? If yes, response to the below points is required and providing validation data is encouraged.
Yes	TRUE
No	FALSE
For all instruments, confirm that the following quality control processes were run:
n/a	Confirmed
TRUE	FALSE	Field homogeneity is assessed.
TRUE	FALSE	Illumination power stability is tested.
TRUE	FALSE	Stage drift is assessed.
TRUE	FALSE	Camera/detector noise is measured.
Methodology
Sample preparation and imaging	VECTASHIELD Antifade Mounting Medium (Vector Lab. H-1000-10); 4ºC
Fluorophores	Donkey anti-Goat IgG (H L) Cross-Adsorbed Secondary Antibody, Alexa Fluor 488 (Life technologies, A11055, laser line 488; 490nm); Donkey anti-Rabbit IgG (H L) Highly Cross-Adsorbed Secondary Antibody, Alexa Fluor 555 (Life technologies, A31572, laser line 532, 553nm); DAPI (Sigma-Aldrich Chemie GmbH, 10236276001, laser line 405, 350nm)
Acquisition
Software	Las X (Leica Microsystems)
Enhancements	No image enhancements were applied during acquisition
Imaging parameters	Horizontal resolution 1ppp, Vertical resolution 1ppp, depth in bits 8. Pixel dwell time and laser power were kept constant across all images within each experiment
Size	1024 x 1024 pixel
Image Processing
Software	ImageJ 1.54f
Workflow	Images were processed in ImageJ using Image > Adjust > Threshold. Threshold levels were manually adjusted for visualization purposes to optimize signal display. No quantitative measurements were derived from thresholded images. Within each figure, threshold settings were applied consistently across all images. No deconvolution, filtering, gamma correction, projection, or other image manipulations…
