# Supplementary material for: Chromatin spatial analysis by METALoci unveils sex-determining 3D regulatory hubs
Source: Nat Struct Mol Biol. 2026 Feb 24;33(4):577–89. doi: 10.1038/s41594-026-01749-z (PMC13095655; doi:10.1038/s41594-026-01749-z)
Supplement: Supplementary file 9 — RSS for male and female 13.5 samples. [file 41594_2026_1749_MOESM9_ESM.xlsx]

## Sheet: Fig6a_Male_13.5
Gene	Sertoli XY13.5
Irf9(-)	0.574618
Thra(+)	0.485329
Sox9(+)	0.463255
Sox8(+)	0.447754
Sox10(-)	0.398519
Foxa3(+)	0.393105
Ets1(-)	0.382344
Mafk(+)	0.381464
Dlx3(-)	0.377971
Hoxa2(-)	0.373913
Vdr(+)	0.365056
Nr2f2(-)	0.362101
Nfil3(+)	0.350896
Hoxc8(-)	0.348417
Emx1(+)	0.345838
Mafb(-)	0.33145
Fev(+)	0.331271
Isx(+)	0.330242
Bhlhe40(+)	0.330176
Mybl1(+)	0.326568
Gata4(+)	0.319983
Elf4(+)	0.317591
Stat1(+)	0.315084
Usf1(-)	0.314239
Emx1(-)	0.308231
Foxf2(+)	0.307658
Tcf3(-)	0.305049
Rxrg(-)	0.304719
Pou3f4(-)	0.30334
Hoxb2(-)	0.302657
Etv4(-)	0.29974
Gata6(-)	0.296046
Ebf1(-)	0.295228
Nfatc3(+)	0.293694
Mxi1(+)	0.292873
Nr2f1(-)	0.291498
Meis3(-)	0.290538
Meis1(-)	0.284934
Nfib(-)	0.284399
Jund(+)	0.283111
Hoxd3(-)	0.280795
Sox17(-)	0.280651
Klf13(+)	0.280641
Fosl2(+)	0.279418
Otx1(-)	0.279171
Irf1(+)	0.277589
Rxra(+)	0.275692
Bhlhe40(-)	0.275518
Runx3(+)	0.274658
Sox3(-)	0.27437
Tbr1(-)	0.273827
Spdef(+)	0.272486
Vax2(-)	0.271313
Gata2(-)	0.269354
Wt1(+)	0.268647
Sox10(+)	0.268346
Rara(+)	0.268145
Hes1(+)	0.26782
Cebpa(-)	0.267727
Mzf1(-)	0.26752
Lhx5(+)	0.267445
Junb(+)	0.267047
Bhlhe41(-)	0.266962
Thrb(+)	0.266734
Sox13(+)	0.26642
Foxk2(+)	0.26558
Cebpb(+)	0.265146
Maff(+)	0.265045
Irf8(+)	0.264064
Egr1(+)	0.263601
Sox5(+)	0.260962
Foxa1(-)	0.260708
Nfyb(-)	0.260098
Myc(+)	0.259496
Npas2(-)	0.25854
Tead1(+)	0.258166
Lhx9(-)	0.257095
Etv6(+)	0.256373
Pbx1(-)	0.256115
Elf2(+)	0.255318
Msx1(-)	0.255046
Bhlhe41(+)	0.254047
Etv5(+)	0.253577
Mnt(+)	0.253491
Lbx2(+)	0.252645
Tbx2(-)	0.252046
Nfib(+)	0.251295
Bhlhe22(-)	0.250619
Isx(-)	0.250431
Mitf(+)	0.250284
Ets2(+)	0.250216
Nfe2l1(+)	0.249908
Tcfl5(-)	0.249759
Nfkb2(+)	0.249661
Fosl1(-)	0.24918
Arntl(+)	0.248547
Irf8(-)	0.24847
Hoxa10(-)	0.248454
Rax(-)	0.248205
Sp9(-)	0.248173
Pparg(-)	0.247895
Elk4(+)	0.247894
Isl1(-)	0.247476
Sox17(+)	0.24742
Isl1(+)	0.246853
Vezf1(-)	0.245877
Usf2(+)	0.245866
Elf1(+)	0.245668
Gata5(-)	0.245658
Pou5f1(-)	0.245239
Pitx3(+)	0.245232
Fos(+)	0.245187
Pitx1(-)	0.245092
Ikzf1(+)	0.244963
Hic1(+)	0.244823
Irf2(+)	0.244755
Yy1(+)	0.244667
Gata6(+)	0.244208
Lmx1b(-)	0.243985
Elk3(-)	0.243607
Runx1(+)	0.243532
Pou3f3(+)	0.243309
Atoh7(-)	0.243263
Lhx4(-)	0.243254
Runx1(-)	0.243081
Nfkb1(+)	0.24306
Lhx5(-)	0.242917
Hoxb13(-)	0.242755
Nfia(+)	0.242714
Nfe2l2(+)	0.242518
Otx2(-)	0.242503
Erg(+)	0.242197
Shox2(-)	0.241816
Hic1(-)	0.241811
Tfeb(+)	0.241225
Fosb(+)	0.241137
Nfe2(-)	0.240731
Sox15(+)	0.240701
Lhx6(-)	0.24066
Mafg(+)	0.24058
Egr4(+)	0.240347
Myb(+)	0.240317
Pou3f2(-)	0.240221
Mixl1(-)	0.240207
Cebpa(+)	0.24007
Tcf12(-)	0.239906
Jun(-)	0.23989
Prdm1(-)	0.239614
Bach1(+)	0.239573
Foxj2(+)	0.239526
Trps1(+)	0.239266
Hoxa13(-)	0.238945
Ebf1(+)	0.238754
Jun(+)	0.238724
Pax7(-)	0.238679
Foxo4(+)	0.238679
Tfec(+)	0.238409
Gcm1(-)	0.238027
Etv1(+)	0.237913
Foxo1(+)	0.237232
Hoxd10(-)	0.237138
Maf(+)	0.237098
E2f1(-)	0.237045
Fos(-)	0.236775
Srebf2(+)	0.236728
E2f7(+)	0.236658
Maz(+)	0.236535
Max(+)	0.236505
Hes7(-)	0.23627
Eomes(-)	0.236256
E2f6(+)	0.235954
Bach2(+)	0.235651
Runx3(-)	0.235513
Onecut2(-)	0.235187
Dlx2(-)	0.235031
Nr3c1(+)	0.235029
Stat5a(+)	0.234925
Hnf1b(+)	0.234883
Thrb(-)	0.234683
Atf2(+)	0.234606
Tal1(-)	0.234512
Nfya(+)	0.234492
E2f8(+)	0.234367
Tcf4(+)	0.234213
Hesx1(+)	0.234207
Nr3c1(-)	0.234188
Zfx(+)	0.233945
Klf7(+)	0.233913
Gfi1b(+)	0.233911
Sp5(+)	0.233908
Foxp2(-)	0.233875
E2f2(+)	0.233854
Zfp42(-)	0.233601
Pou5f1(+)	0.233513
Erg(-)	0.233445
Lhx8(-)	0.233398
Gmeb1(+)	0.233369
Zbtb7a(+)	0.233316
Barhl2(-)	0.233008
Pou4f1(+)	0.232959
Elk1(+)	0.232903
Gata1(-)	0.232899
Foxa2(+)	0.232816
Hand1(+)	0.232779
Mzf1(+)	0.232724
Pbx3(+)	0.23258
Cebpg(+)	0.232547
Spdef(-)	0.232537
Gata3(-)	0.232494
Cebpb(-)	0.232263
Tfdp1(-)	0.232212
Elk3(+)	0.232023
Thap11(+)	0.232015
Ets1(+)	0.232001
Tcf12(+)	0.231881
Pitx1(+)	0.231796
Phox2b(-)	0.23164
Ascl1(+)	0.231498
Tgif1(+)	0.231453
Tfap2a(-)	0.231331
E2f3(+)	0.231276
Tfdp1(+)	0.231169
Cux1(+)	0.230957
Gata1(+)	0.230803
Nobox(-)	0.230453
Pax2(-)	0.230403
Hsf1(+)	0.230122
Etv4(+)	0.22981
Nr1d1(-)	0.22977
Gata2(+)	0.229687
Fli1(+)	0.229239
Hoxa7(+)	0.229227
Tcf7l2(+)	0.229225
Etv2(+)	0.229208
Myod1(+)	0.228879
Rfx2(+)	0.228791
Creb1(+)	0.228622
Hoxa10(+)	0.228608
Gabpa(+)	0.228543
Foxa1(+)	0.228531
Sox11(+)	0.228313
Tal1(+)	0.228146
Relb(+)	0.227993
Foxo1(-)	0.227798
E2f1(+)	0.227601
Tcf3(+)	0.227461
Phox2a(-)	0.227028
Usf1(+)	0.226765
Nfyc(+)	0.226743
Hoxc8(+)	0.22668
Hoxb13(+)	0.226527
Msx2(+)	0.2265
Tead2(+)	0.226423
Junb(-)	0.226358
Hand2(+)	0.226285
Plagl1(-)	0.226101
Nfic(+)	0.226
Nr1h4(-)	0.225539
Meis1(+)	0.22545
Etv5(-)	0.225255
Hand2(-)	0.22516
Nfyb(+)	0.225124
Mafb(+)	0.225116
Elf5(+)	0.225097
Spi1(+)	0.224843
Nr2f2(+)	0.224728
Elf5(-)	0.22472
Thap11(-)	0.224621
Tlx2(-)	0.22438
Hand1(-)	0.224268
Atf6(+)	0.224239
Maff(-)	0.224171
Pbx2(+)	0.223938
Cebpd(-)	0.223193
Tfap2a(+)	0.223069
Tead4(-)	0.222911
Foxa2(-)	0.222907
Ikzf1(-)	0.222842
Olig3(+)	0.22249
Tfap4(+)	0.222433
Tead4(+)	0.222432
Pou3f1(+)	0.22236
Tfap2c(+)	0.222095
Hnf4a(+)	0.221741
Nfix(+)	0.221591
Cdx2(+)	0.221452
Foxo6(-)	0.221279
Etv1(-)	0.220704
Etv2(-)	0.220007
Alx1(+)	0.219753
Hoxb5(+)	0.219515
Nfe2l1(-)	0.219494
Rfx4(+)	0.219418
Pbx1(+)	0.219243
Hoxd12(-)	0.219013
Hoxd12(+)	0.218639
Foxl1(-)	0.218276
Elf3(+)	0.218271
Mafk(-)	0.218228
Ets2(-)	0.217945
Zbtb12(+)	0.217218
Zfp57(+)	0.217037
Cebpe(-)	0.216823
Nfkb2(-)	0.216773
Hnf4a(-)	0.216638
Tlx2(+)	0.216529
Ehf(-)	0.216499
Jund(-)	0.216459
Myb(-)	0.216421
Hnf1a(-)	0.215835
Rarb(+)	0.215815
Gata4(-)	0.215613
Stat1(-)	0.215528
Maf(-)	0.215401
Isl2(+)	0.215359
Dlx3(+)	0.215271
Hes7(+)	0.215224
Gata3(+)	0.215191
Gfi1b(-)	0.215037
Wt1(-)	0.214772
Nfia(-)	0.214666
Fli1(-)	0.214497
Olig1(-)	0.214394
Hoxb2(+)	0.213958
Irf7(-)	0.213927
Sox8(-)	0.213883
Nfe2(+)	0.213706
Gbx1(-)	0.213584
Rfx3(+)	0.213224
Dlx2(+)	0.212833
Ovol2(-)	0.212539
Cebpe(+)	0.212362
Nr1h4(+)	0.212171
Gbx1(+)	0.212079
Sox3(+)	0.211945
Hoxa5(-)	0.211941
Thra(-)	0.211746
E2f3(-)	0.211599
E2f8(-)	0.211489
Atf1(-)	0.210801
Hoxa1(+)	0.210311
Sp2(+)	0.210054
Lhx2(+)	0.209477
Dbp(-)	0.208447
Mafg(-)	0.207703
Arid3a(-)	0.20719
Hoxc4(+)	0.207183
Dlx1(+)	0.207145
Myf5(-)	0.206415
Fosl2(-)	0.206209
Pax7(+)	0.206172
Foxc1(-)	0.206018
Pou2f1(+)	0.205883
Dlx5(+)	0.205806
Myf6(-)	0.205652
Gsc(+)	0.20507
Irf5(-)	0.205019
Sp1(-)	0.204276
Dmrt1(-)	0.204264
Irf6(-)	0.204197
Hoxb3(-)	0.203994
Otx1(+)	0.203498
Lhx1(-)	0.20347
Dmrt3(+)	0.203321
Mybl1(-)	0.203076
Creb5(-)	0.202984
Rax(+)	0.202518
Hoxa13(+)	0.200256
Myc(-)	0.199682
Zscan29(+)	0.199341
Tfap2c(-)	0.199301
Olig3(-)	0.199168
Rfx5(+)	0.19912
Prdm5(+)	0.198823
Gcm1(+)	0.198795
Pou3f1(-)	0.198767
Pknox2(+)	0.19859
Mxi1(-)	0.198369
Nr5a1(-)	0.197965
Myf5(+)	0.197191
Hoxc10(+)	0.197073
Foxb1(-)	0.196578
Egr1(-)	0.196355
Nfatc1(+)	0.196248
Arnt2(+)	0.195654
E2f7(-)	0.195579
Fosl1(+)	0.194963
Rxrg(+)	0.194799
Mga(-)	0.19474
Tgif1(-)	0.192502
Esx1(+)	0.192389
Sox15(-)	0.191867
Elf1(-)	0.191755
Dbp(+)	0.191569
Pax3(+)	0.191035
Sox9(-)	0.190102
Alx4(+)	0.18988
Tcf21(+)	0.189116
Pbx2(-)	0.188424
Lhx4(+)	0.18817
Pax5(+)	0.187967
Foxd2(-)	0.186895
Ahr(+)	0.186427
Onecut3(+)	0.185737
Lbx2(-)	0.185663
Foxd3(+)	0.185247
Sp4(+)	0.185191
Zbtb14(+)	0.184518
En2(+)	0.184311
Elf4(-)	0.183475
Hoxd3(+)	0.183321
Esrrb(-)	0.182187
Tfeb(-)	0.181737
Pou2f1(-)	0.181302
Irf2(-)	0.181191
Pparg(+)	0.180779
Dlx6(+)	0.180553
Bach2(-)	0.180079
Foxo4(-)	0.1799
Myog(-)	0.179217
Gbx2(-)	0.178685
Stat6(+)	0.178616
Shox2(+)	0.178365
Irf6(+)	0.177979
Atf3(-)	0.177966
Foxg1(+)	0.177787
Irf3(-)	0.177682
Ar(-)	0.177056
Foxb1(+)	0.176819
Rxra(-)	0.176747
Stat4(-)	0.176618
Foxa3(-)	0.176551
Gata5(+)	0.176328
Irf7(+)	0.176187
Vdr(-)	0.175255
Zeb1(-)	0.175243
Foxd2(+)	0.175038
Myf6(+)	0.174186
Pax9(-)	0.173811
Hoxa5(+)	0.173545
Myod1(-)	0.173441
Hmx1(-)	0.173243
Esrrg(+)	0.17317
Yy1(-)	0.17302
Six1(+)	0.172828
Nfatc1(-)	0.172737
Ehf(+)	0.172645
Creb3l4(-)	0.172519
Tbx5(-)	0.172423
Mlxipl(+)	0.172344
Twist1(+)	0.172153
Gli1(+)	0.172079
Stat6(-)	0.171667
Lhx6(+)	0.170879
E2f2(-)	0.17072
Hnf1a(+)	0.170644
Esr2(+)	0.170523
Irf1(-)	0.170315
Lmx1a(+)	0.170234
Sox6(-)	0.170194
Foxk1(+)	0.170101
Alx3(+)	0.169966
Tcf7l1(-)	0.169744
Otx2(+)	0.169674
Pbx3(-)	0.169556
Sox18(+)	0.169526
Nr3c2(+)	0.169463
Elf3(-)	0.169459
Nfatc4(-)	0.169413
Vax2(+)	0.16935
Hoxd8(-)	0.169142
Creb3l2(-)	0.169141
Grhl1(-)	0.168931
Cdx2(-)	0.168793
Ppara(-)	0.168662
Figla(-)	0.168579
Egr2(-)	0.168247
Gsc2(-)	0.168197
Tfec(-)	0.168086
Prrx2(-)	0.168074
Meox1(+)	0.1677
Elk1(-)	0.167688
Ascl1(-)	0.167445
Spi1(-)	0.167445
Nr1h3(-)	0.167445

## Sheet: Fig6a_Female_13.5
Gene	Granulosa XX13.5
Isx(-)	0.519448
Esr1(-)	0.505589
Ppara(+)	0.505331
Foxl2(+)	0.496532
Meis1(-)	0.4732
Bhlhe41(+)	0.435526
Dbp(+)	0.43136
Smad3(+)	0.426592
Pbx1(-)	0.411822
Hes7(+)	0.402016
Rarb(-)	0.401842
Nr2f2(-)	0.397452
Irf7(-)	0.386189
Elk3(-)	0.384636
Bach2(-)	0.381964
Hes1(+)	0.379929
Usf1(-)	0.375874
Twist2(-)	0.368745
Hey1(+)	0.367452
Tcf3(-)	0.363544
Elk4(+)	0.361882
Ets1(-)	0.359338
Ebf1(-)	0.35706
Sox9(+)	0.356505
Gata4(+)	0.346238
Twist1(-)	0.345081
Nr2f1(-)	0.344901
Runx1(+)	0.338625
Bhlhe40(-)	0.338104
Nr1h4(+)	0.33753
Elf4(+)	0.33478
Foxg1(+)	0.334349
Nr2e3(-)	0.333612
Cebpd(+)	0.32971
Cebpb(+)	0.329476
Myb(+)	0.328601
Hoxd4(+)	0.327783
Ppara(-)	0.327476
Cebpa(+)	0.325609
Elf1(+)	0.3253
Stat6(+)	0.323051
Atf3(-)	0.321161
Hic1(-)	0.318786
Maff(-)	0.318317
Nr3c1(-)	0.31764
Pitx3(+)	0.315929
Thap11(-)	0.31444
Wt1(+)	0.313498
Irf8(+)	0.313198
Six2(-)	0.310124
Zbtb7a(+)	0.310074
Tcf12(+)	0.309583
Nfatc1(+)	0.309466
Hoxc11(-)	0.309363
Mafk(-)	0.308846
Klf4(+)	0.30817
Foxp1(-)	0.306621
Tfap2a(-)	0.306317
Pou5f1(-)	0.305845
Zfp42(-)	0.305828
Etv4(+)	0.305713
Nfia(+)	0.305081
Gata1(+)	0.304401
Cebpe(-)	0.304264
Sox2(-)	0.303899
Rfx5(+)	0.302545
Fli1(-)	0.301727
Rela(+)	0.30161
Gata3(+)	0.30139
Rfx5(-)	0.301293
Nr5a1(+)	0.301058
Nfatc2(+)	0.300082
Junb(+)	0.298871
Klf9(+)	0.298764
Rfx1(-)	0.298762
Tcf21(+)	0.29859
Pou3f1(+)	0.298298
Rara(+)	0.298111
Hoxc11(+)	0.298041
Srebf1(-)	0.297892
Thra(+)	0.297742
Ascl1(-)	0.297694
Hand1(+)	0.297567
Sox10(-)	0.297393
Erg(+)	0.29693
Spi1(+)	0.29675
Rxra(+)	0.29666
En1(-)	0.296219
Cdx2(-)	0.296172
Elf3(+)	0.296142
Nr1h3(+)	0.295794
Vdr(+)	0.295764
Rxrg(+)	0.295752
Lef1(+)	0.295037
Myc(+)	0.295
Cdx2(+)	0.29481
Pou6f1(+)	0.294222
Mzf1(-)	0.29342
Rfx4(-)	0.293333
Pax3(-)	0.293158
Eomes(-)	0.293051
Hand2(+)	0.292576
Sox5(+)	0.29242
Foxa3(+)	0.291895
Klf7(+)	0.291489
Sox15(-)	0.291427
Thra(-)	0.291052
Foxl1(+)	0.290992
Relb(+)	0.290937
Atf3(+)	0.290935
Foxj3(+)	0.290648
Hoxa13(-)	0.290544
Ascl2(+)	0.290245
Irf1(+)	0.290146
Maf(-)	0.289972
Otx2(-)	0.289594
Egr1(+)	0.289561
Nhlh1(-)	0.289405
Ets1(+)	0.289396
Pou3f2(-)	0.289279
Hnf4a(+)	0.289143
Pou3f1(-)	0.289041
Nfix(-)	0.288908
Bhlhe40(+)	0.28888
Jun(+)	0.288815
Myod1(-)	0.288679
Elk1(+)	0.288572
Tfeb(+)	0.288432
Usf1(+)	0.28843
Atf2(+)	0.288349
Klf4(-)	0.288095
Hoxb8(-)	0.288085
Onecut2(+)	0.287932
Nfic(+)	0.287842
Hsf1(+)	0.287632
Ikzf1(+)	0.287453
Tbx4(-)	0.287266
Atf1(+)	0.287207
Nfe2(+)	0.287156
Pou5f1(+)	0.286769
Cebpb(-)	0.286654
Sox9(-)	0.286477
Max(+)	0.285529
Rxrg(-)	0.285433
Tcf4(+)	0.285429
Rxrb(+)	0.285222
Hnf1b(+)	0.285209
Crem(+)	0.285115
Spi1(-)	0.285006
Elk3(+)	0.284929
Hey2(-)	0.284826
Ets2(-)	0.28463
Pax9(-)	0.284531
Nfib(+)	0.284444
Yy1(+)	0.284434
Figla(-)	0.284383
Foxj2(+)	0.284295
E2f1(-)	0.28429
Gata2(+)	0.284116
Foxa2(-)	0.284055
Tal1(+)	0.284026
Sox2(+)	0.283724
Irf5(+)	0.283628
Arx(+)	0.283318
Hic1(+)	0.283318
E2f6(+)	0.283147
Tbx3(+)	0.282869
Tal1(-)	0.282776
Tfap2c(+)	0.282707
Myf5(+)	0.282099
Myf6(+)	0.282034
Arid3a(+)	0.281956
Hoxb2(-)	0.281588
Mafb(+)	0.281514
E2f1(+)	0.281255
Maf(+)	0.280814
Atf4(+)	0.279937
Hmbox1(+)	0.279762
Pbx1(+)	0.279741
Nfyc(+)	0.279607
Etv2(+)	0.279607
Nfe2l1(+)	0.278837
Jund(-)	0.278828
Foxd3(-)	0.278825
Otx1(-)	0.278798
Hnf4a(-)	0.2786
Jund(+)	0.278378
Sox12(+)	0.277972
Erg(-)	0.277931
Batf3(-)	0.277594
Foxc1(+)	0.277504
Zbtb12(+)	0.277405
Elf4(-)	0.277156
Etv1(+)	0.277145
Rax(-)	0.276736
Runx3(-)	0.276688
Pknox2(-)	0.276479
Nfyb(+)	0.276411
Etv1(-)	0.27626
Ascl1(+)	0.27616
Fosl1(-)	0.276144
Foxo1(+)	0.276099
Tbp(+)	0.275968
Sox11(+)	0.275716
Tfdp1(+)	0.275685
Onecut2(-)	0.275626
Runx3(+)	0.275516
Smad4(+)	0.275489
Foxa3(-)	0.274671
Nr3c1(+)	0.27465
Elf3(-)	0.27453
Insm1(-)	0.274362
Dlx6(-)	0.274276
Srebf2(+)	0.273968
Dlx2(-)	0.273843
Mafg(+)	0.273816
Etv5(+)	0.273704
Foxl2(-)	0.273416
Jun(-)	0.272974
Mxi1(-)	0.272748
Gata3(-)	0.272654
Esx1(+)	0.272622
Nr2f1(+)	0.272599
Fosb(-)	0.272361
Atf7(+)	0.272243
Irf2(+)	0.272168
Otx2(+)	0.272162
Pou2f1(+)	0.271954
Klf10(+)	0.271635
Ikzf1(-)	0.271364
Sox4(-)	0.271282
Creb5(+)	0.2711
Pitx1(+)	0.270509
Rel(-)	0.269986
Fli1(+)	0.269788
Gmeb1(+)	0.269386
Tcf7l1(+)	0.268345
Twist2(+)	0.26829
E2f3(+)	0.268049
Hoxa13(+)	0.267758
Hnf1a(+)	0.267414
E2f8(+)	0.26702
Lmx1a(-)	0.266815
Stat1(+)	0.266785
Gata2(-)	0.266234
Pparg(+)	0.266113
Tfap4(+)	0.266078
Nfatc1(-)	0.266044
Clock(+)	0.26604
Gabpa(+)	0.266024
Myb(-)	0.26586
Dlx4(-)	0.265828
Pax6(-)	0.265632
Cebpg(+)	0.265352
Hoxb6(+)	0.265293
Rarg(+)	0.265209
Etv4(-)	0.265013
Hoxb3(+)	0.264989
Elf5(+)	0.26473
Hoxc9(+)	0.264299
Pax7(-)	0.264017
Creb1(+)	0.263965
Patz1(+)	0.263787
Dmrtc2(+)	0.263386
E2f7(+)	0.263283
Hoxb2(+)	0.262859
Nfia(-)	0.262404
Hoxb13(-)	0.2623
Tbx20(+)	0.262214
Tead4(+)	0.261921
Pou6f2(-)	0.26046
Gbx1(-)	0.260361
Etv3(+)	0.258899
Fos(-)	0.258555
Gsc2(-)	0.258165
Pbx3(+)	0.257961
Nfatc2(-)	0.257756
Xbp1(+)	0.25768
Tbx4(+)	0.257663
Dlx3(+)	0.257338
Hoxa2(+)	0.25665
Pparg(-)	0.255663
Spdef(-)	0.255205
Nfe2(-)	0.255156
Mga(+)	0.255043
Hoxd12(+)	0.254793
Atoh7(+)	0.25477
Gsx1(-)	0.254616
Etv5(-)	0.254517
Dlx1(-)	0.254422
Fosl2(+)	0.253782
Gata4(-)	0.25338
Irf8(-)	0.252353
Foxo1(-)	0.252097
Cux1(+)	0.250488
Foxh1(-)	0.250396
Bach1(+)	0.250232
Prdm1(+)	0.249214
Lmx1b(+)	0.248857
Bcl6(-)	0.247885
Ovol2(+)	0.247138
Hoxa5(-)	0.246909
Tead4(-)	0.246878
Nfya(+)	0.246752
E2f2(+)	0.246104
Ehf(-)	0.245907
Foxc1(-)	0.245828
Lhx5(-)	0.24572
Mxi1(+)	0.244847
Thrb(-)	0.244157
Rfx4(+)	0.243863
Srf(+)	0.243433
Sox18(+)	0.243059
Six1(-)	0.242976
Rax(+)	0.24291
Ebf1(+)	0.241341
Sox6(+)	0.241084
Elf2(+)	0.240731
Zbtb7a(-)	0.240547
Hoxa1(-)	0.240071
Gata5(+)	0.239824
Tbx5(-)	0.239733
En2(-)	0.239521
Tbx1(+)	0.23907
Foxa1(-)	0.238971
Zbtb14(+)	0.238506
Nr2f6(+)	0.237824
Cebpa(-)	0.237476
Zic3(+)	0.237341
Tbx18(-)	0.236377
Thrb(+)	0.235974
Sp9(-)	0.235435
Bhlha15(+)	0.235346
Ovol2(-)	0.235055
Alx4(-)	0.23481
Msc(+)	0.233875
Sp4(+)	0.233492
Srebf1(+)	0.233135
Fosl1(+)	0.232781
Stat2(+)	0.232494
Wt1(-)	0.232487
Gata6(-)	0.232286
Vax2(-)	0.23162
Nr2f2(+)	0.230932
Cux1(-)	0.23066
Zbtb26(-)	0.230579
Runx2(+)	0.230365
Gsc2(+)	0.229584
Rhox11(-)	0.229276
E2f8(-)	0.227674
Hoxa6(+)	0.226732
Hoxc13(-)	0.226574
Nr1h4(-)	0.226302
Myf6(-)	0.226268
Rfx2(+)	0.22608
Zic4(-)	0.224536
Dbp(-)	0.224396
Hoxb4(+)	0.223657
Nr4a1(+)	0.223549
Tcf4(-)	0.223307
Bach2(+)	0.223269
Plagl1(+)	0.22189
Dlx5(+)	0.221752
Mef2c(+)	0.221622
Hnf1a(-)	0.221208
Maff(+)	0.219048
Hoxb5(+)	0.218738
Sox8(+)	0.2187
Eomes(+)	0.218611
Foxl1(-)	0.217824
Foxg1(-)	0.217187
Hoxb13(+)	0.216268
Stat1(-)	0.216205
Mitf(+)	0.213887
Alx1(+)	0.211351
Ets2(+)	0.210872
Stat4(-)	0.20999
Tbx5(+)	0.209603
Tfap2c(-)	0.209296
Ehf(+)	0.208844
Fev(+)	0.2086
Pax7(+)	0.2084
Pitx1(-)	0.207714
Stat5a(-)	0.207489
Elf1(-)	0.206986
Rhox11(+)	0.205998
Sox17(-)	0.205073
Sox10(+)	0.204071
Irf7(+)	0.203004
Zfx(+)	0.202785
Jdp2(-)	0.202514
Etv2(-)	0.201697
Meis1(+)	0.201205
Lhx4(-)	0.201138
Nfkb1(+)	0.199485
Hsf2(+)	0.199015
Klf12(-)	0.198823
Elf2(-)	0.198499
Runx1(-)	0.197845
Gbx1(+)	0.197658
Pou2f3(+)	0.197642
Otx1(+)	0.196824
Gata5(-)	0.195305
Hoxa4(+)	0.194899
Sox3(-)	0.193435
Dlx2(+)	0.193416
Foxa2(+)	0.192594
Ctcf(+)	0.191005
Yy1(-)	0.190729
Sp2(+)	0.190624
Vdr(-)	0.190242
Hoxa10(-)	0.189506
Hey1(-)	0.18937
Irf9(+)	0.188387
Vsx2(-)	0.187444
Nr2c2(+)	0.186252
Mzf1(+)	0.185821
Tfeb(-)	0.185765
Foxf2(-)	0.184949
Zic3(-)	0.184255
Irf1(-)	0.184107
Tlx2(+)	0.183019
Irf9(-)	0.181879
Irf6(-)	0.181397
Pou3f2(+)	0.181391
Gcm1(+)	0.180894
Stat5a(+)	0.180222
Jdp2(+)	0.180095
Zbtb18(+)	0.179969
Elk1(-)	0.179832
Creb3(-)	0.179781
E2f3(-)	0.179158
Cebpe(+)	0.178436
Gbx2(-)	0.178428
Foxj2(-)	0.178321
Hoxa1(+)	0.177745
Foxa1(+)	0.176503
Zeb1(-)	0.175588
Sox21(-)	0.175564
Lhx4(+)	0.175521
Olig3(-)	0.175307
Nr1h3(-)	0.174044
Foxo6(-)	0.17398
Nhlh1(+)	0.173844
Stat6(-)	0.173288
Olig1(+)	0.17291
Bhlhe22(-)	0.172756
Alx3(-)	0.172547
Atf2(-)	0.172088
Dlx3(-)	0.172036
Myod1(+)	0.172021
Tfdp1(-)	0.171867
Tcf7l1(-)	0.171489
Myf5(-)	0.171248
Esrra(-)	0.170903
Rorc(+)	0.170724
Cebpd(-)	0.1705
Nfe2l2(-)	0.169651
Nr1d1(-)	0.16961
Srebf2(-)	0.169562
Vax2(+)	0.169554
Nr5a2(-)	0.169477
Onecut3(+)	0.16945
Scrt1(+)	0.16924
Arid5a(-)	0.168845
Zbtb12(-)	0.168627
Tbx20(-)	0.168527
Nfyb(-)	0.168438
Rfx7(-)	0.168368
Erf(-)	0.168016
Sox18(-)	0.167584
Esrra(+)	0.167445
Klf13(-)	0.167445
