# Supplementary material for: Chromatin spatial analysis by METALoci unveils sex-determining 3D regulatory hubs
Source: Nat Struct Mol Biol. 2026 Feb 24;33(4):577–89. doi: 10.1038/s41594-026-01749-z (PMC13095655; doi:10.1038/s41594-026-01749-z)
Supplement: Supplementary file 10 — A/B compartment data. [file 41594_2026_1749_MOESM10_ESM.xlsx]

## Sheet: ED_Fig_1_a-e
chrom	start	end	compartment_male_13.5	ev_male_13.5	compartment_female_13.5	ev_female_13.5	compartment_male_10.5	ev_male_10.5	compartment_female_10.5	ev_female_10.5	compartments_NPC	ev_NPC	compartments_ES	ev_ES	compartments_CN	ev_CN
1	1	100000	A	0.0	A	-0.0	A	0.0	A	0.0	A	-0.0	A	-0.0	A	0.0
1	100001	200000	A	-0.0	A	-0.0	A	0.0	A	0.0	A	-0.0	A	-0.0	A	0.0
1	200001	300000	A	-0.0	A	-0.0	A	0.0	A	0.0	A	-0.0	A	-0.0	A	0.0
1	300001	400000	A	-0.0	A	-0.0	A	0.0	A	0.0	A	-0.0	A	-0.0	A	0.0
1	400001	500000	A	-0.0	A	-0.0	A	0.0	A	0.0	A	-0.0	A	-0.0	A	0.0
1	500001	600000	A	-0.0	A	-0.0	A	0.0	A	0.0	A	-0.0	A	-0.0	A	0.0
1	600001	700000	A	-0.0	A	-0.0	A	0.0	A	0.0	A	-0.0	A	-0.0	A	0.0
1	700001	800000	A	-0.0	A	-0.0	A	0.0	A	0.0	A	-0.0	A	-0.0	A	0.0
1	800001	900000	A	-0.0	A	-0.0	A	0.0	A	0.0	A	-0.0	A	-0.0	A	0.0
1	900001	1000000	A	-0.0	A	-0.0	A	0.0	A	0.0	A	-0.0	A	-0.0	A	0.0
1	1000001	1100000	A	-0.0	A	-0.0	A	0.0	A	0.0	A	-0.0	A	-0.0	A	0.0
1	1100001	1200000	A	-0.0	A	-0.0	A	0.0	A	0.0	A	-0.0	A	-0.0	A	0.0
1	1200001	1300000	A	-0.0	A	-0.0	A	0.0	A	0.0	A	-0.0	A	-0.0	A	0.0
1	1300001	1400000	A	-0.0	A	-0.0	A	0.0	A	0.0	A	-0.0	A	-0.0	A	0.0
1	1400001	1500000	A	-0.0	A	-0.0	A	0.0	A	0.0	A	-0.0	A	-0.0	A	0.0
1	1500001	1600000	A	-0.0	A	-0.0	A	0.0	A	0.0	A	-0.0	A	-0.0	A	0.0
1	1600001	1700000	A	-0.0	A	-0.0	A	0.0	A	0.0	A	-0.0	A	-0.0	A	0.0
1	1700001	1800000	A	-0.0	A	-0.0	A	0.0	A	0.0	A	-0.0	A	-0.0	A	0.0
1	1800001	1900000	A	-0.0	A	-0.0	A	0.0	A	0.0	A	-0.0	A	-0.0	A	0.0
1	1900001	2000000	A	-0.0	A	-0.0	A	0.0	A	0.0	A	-0.0	A	-0.0	A	0.0
1	2000001	2100000	A	-0.0	A	-0.0	A	0.0	A	0.0	A	-0.0	A	-0.0	A	0.0
1	2100001	2200000	A	-0.0	A	-0.0	A	0.0	A	0.0	A	-0.0	A	-0.0	A	0.0
1	2200001	2300000	A	-0.0	A	-0.0	A	0.0	A	0.0	A	-0.0	A	-0.0	A	0.0
1	2300001	2400000	A	-0.0	A	-0.0	A	0.0	A	0.0	A	-0.0	A	-0.0	A	0.0
1	2400001	2500000	A	-0.0	A	-0.0	A	0.0	A	0.0	A	-0.0	A	-0.0	A	0.0
1	2500001	2600000	A	-0.0	A	-0.0	A	0.0	A	0.0	A	-0.0	A	-0.0	A	0.0
1	2600001	2700000	A	-0.0	A	-0.0	A	0.0	A	0.0	A	-0.0	A	-0.0	A	0.0
1	2700001	2800000	A	-0.0	A	-0.0	A	0.0	A	0.0	A	-0.0	A	-0.0	A	0.0
1	2800001	2900000	A	-0.0	A	-0.0	A	0.0	A	0.0	A	-0.0	A	-0.0	A	0.0
1	2900001	3000000	A	-0.0	A	-0.0	A	0.0	A	0.0	A	-0.0	A	-0.0	A	0.0
1	3000001	3100000	B	-0.0105245625600218	B	-0.0143424207344651	B	-0.0054564950987696	B	-0.0066171684302389	B	-0.0129402000457048	B	-0.0021234988234937	B	-0.0254983510822057
1	3100001	3200000	B	-0.0114971483126282	B	-0.015150424093008	B	-0.0061565432697534	B	-0.0082312440499663	B	-0.0148173030465841	B	-0.0032234143000096	B	-0.0265106074512004
1	3200001	3300000	B	-0.0133579950779676	B	-0.0179441310465335	B	-0.0070396601222455	B	-0.0101426178589463	B	-0.0142058571800589	B	-0.0035706139169633	B	-0.0227820985019207
1	3300001	3400000	B	-0.01399402692914	B	-0.0176408253610134	B	-0.0072429655119776	B	-0.0093392804265022	B	-0.0126069979742169	B	-0.0024473704397678	B	-0.0179294105619192
1	3400001	3500000	B	-0.0129618505015969	B	-0.0168902464210987	B	-0.0076966877095401	B	-0.0095186112448573	B	-0.011755202896893	B	-0.0018548688385635	B	-0.0153707442805171
1	3500001	3600000	B	-0.0123600289225578	B	-0.0188773050904274	B	-0.006738266441971	B	-0.0098482044413685	B	-0.012375527061522	B	-0.0013280168641358	B	-0.0160621758550405
1	3600001	3700000	B	-0.0109415166079998	B	-0.0161082297563552	B	-0.0068560694344341	B	-0.0082062147557735	B	-0.0111713930964469	B	-0.0012105014175176	B	-0.0177695639431476
1	3700001	3800000	B	-0.0134495748206973	B	-0.0187248103320598	B	-0.0073461742140352	B	-0.010139406658709	B	-0.0137174138799309	B	-0.0031789711210876	B	-0.0257985536009073
1	3800001	3900000	B	-0.0150064164772629	B	-0.0184976421296596	B	-0.0078175822272896	B	-0.0098569877445697	B	-0.0150844994932413	B	-0.0032247565686702	B	-0.026020536199212
1	3900001	4000000	B	-0.0156809370964765	B	-0.0195099227130413	B	-0.0083255320787429	B	-0.0116137424483895	B	-0.014210782945156	B	-0.0010631659533828	B	-0.0255256351083517
1	4000001	4100000	B	-0.0164550803601741	B	-0.0184650234878063	B	-0.0079997135326266	B	-0.0102310059592127	B	-0.0147316502407193	B	-0.0020966741722077	B	-0.0254982449114322
1	4100001	4200000	B	-0.0150056658312678	B	-0.0193387642502784	B	-0.0067949406802654	B	-0.0110980132594704	B	-0.0137227373197674	B	-0.0014776951866224	B	-0.0246450193226337
1	4200001	4300000	B	-0.0147421192377805	B	-0.0167994871735572	B	-0.0070762149989604	B	-0.009339340031147	B	-0.0124650970101356	B	-0.002887439681217	B	-0.0232457406818866
1	4300001	4400000	B	-0.0154036106541752	B	-0.0152562959119677	B	-0.0059601147659122	B	-0.0081450147554278	B	-0.0125007005408406	B	-0.0019921860657632	B	-0.0223694685846567
1	4400001	4500000	B	-0.0149338971823453	B	-0.0147012276574969	B	-0.003945751581341	B	-0.0049802009016275	B	-0.0112346606329083	A	0.0023467906285077	B	-0.0223541483283042
1	4500001	4600000	B	-0.0094999885186553	B	-0.015005194582045	B	-0.0021604327484965	B	-0.0047546639107167	B	-0.0093382438644766	A	0.0070940400473773	B	-0.0193804875016212
1	4600001	4700000	B	-0.0107391159981489	B	-0.018047472462058	B	-0.0036253449507057	B	-0.0081208487972617	B	-0.014607174322009	A	0.0068484377115964	B	-0.0241139158606529
1	4700001	4800000	B	-0.0075794546864926	B	-0.0155284684151411	B	-0.0018165608635172	B	-0.0043018152937293	B	-0.0094688953831791	A	0.0133976340293884	B	-0.0201068315654993
1	4800001	4900000	B	-0.0062649021856486	B	-0.0078660305589437	A	0.005228322930634	A	0.0026510613970458	A	0.0017418237403035	A	0.0284893829375505	B	-0.0070570278912782
1	4900001	5000000	B	-0.0189813207834959	B	-0.0236265622079372	B	-0.0046381885185837	B	-0.0073055569082498	B	-0.0065163425169885	A	0.0193374194204807	B	-0.0147319762036204
1	5000001	5100000	B	-0.016449624672532	B	-0.0199853759258985	B	-0.0040605803951621	B	-0.0071224314160645	B	-0.0073711727745831	A	0.0151117593050003	B	-0.0150236673653125
1	5100001	5200000	B	-0.0169911757111549	B	-0.0197733938694	B	-0.007857721298933	B	-0.0089779924601316	B	-0.0111060906201601	A	0.0128569891676306	B	-0.017975041642785
1	5200001	5300000	B	-0.0225574560463428	B	-0.0257161539047956	B	-0.0118458252400159	B	-0.0109367109835147	B	-0.0116700707003474	A	0.0067608086392283	B	-0.0253654923290014
1	5300001	5400000	B	-0.0223200265318155	B	-0.0283686984330415	B	-0.0135048814117908	B	-0.0195160713046789	B	-0.019740292802453	B	-0.0051534925587475	B	-0.0299976244568824
1	5400001	5500000	B	-0.0232266709208488	B	-0.0271926429122686	B	-0.0130708133801817	B	-0.0161697007715702	B	-0.0212455037981271	B	-0.0072400565259158	B	-0.0304313115775585
1	5500001	5600000	B	-0.0231858436018228	B	-0.0259477943181991	B	-0.0132986484095454	B	-0.0159936975687742	B	-0.0205173082649707	B	-0.0093769524246454	B	-0.0306634698063135
1	5600001	5700000	B	-0.0233691874891519	B	-0.024116126820445	B	-0.0114568173885345	B	-0.0171720590442419	B	-0.0193852987140417	B	-0.0089201526716351	B	-0.0303200986236333
1	5700001	5800000	B	-0.0250283852219581	B	-0.021964082494378	B	-0.0156453568488359	B	-0.0168634857982397	B	-0.0215907227247953	B	-0.0087657123804092	B	-0.0305764470249414
1	5800001	5900000	B	-0.022271491587162	B	-0.0251889936625957	B	-0.0125952633097767	B	-0.019007122144103	B	-0.0197284836322069	B	-0.0075077121146023	B	-0.0296107903122901
1	5900001	6000000	B	-0.0203935038298368	B	-0.0241552833467721	B	-0.0110432356595993	B	-0.0133725153282284	B	-0.0179434735327959	B	-0.0028287917375564	B	-0.0290857013314962
1	6000001	6100000	B	-0.0209596883505582	B	-0.0279369782656431	B	-0.0100258206948637	B	-0.017172111198306	B	-0.0195168554782867	B	-0.0027230933774262	B	-0.0311687104403972
1	6100001	6200000	B	-0.0156603790819644	B	-0.0195856504142284	B	-0.0088895335793495	B	-0.0123450979590415	B	-0.0186170116066932	A	0.0006464825710281	B	-0.0289158206433057
1	6200001	6300000	B	-0.0084115285426378	B	-0.0114661445841193	B	-0.0015495386905968	B	-0.0043439003638923	B	-0.0045405579730868	A	0.0135245015844702	B	-0.0113004213199019
1	6300001	6400000	B	-0.0164048969745636	B	-0.0219562146812677	B	-0.0076256506145	B	-0.0125868190079927	B	-0.0146134039387106	A	0.0001442841166863	B	-0.023685622960329
1	6400001	6500000	B	-0.0119602726772427	B	-0.0185599997639656	B	-0.0079414462670683	B	-0.011862508021295	B	-0.0073218783363699	B	-0.0004703988670371	B	-0.0184769704937934
1	6500001	6600000	B	-0.0171672701835632	B	-0.024390060454607	B	-0.0137169724330306	B	-0.0187571477144956	B	-0.0128864664584398	B	-0.0108545860275626	B	-0.0222147293388843
1	6600001	6700000	B	-0.0194680839776992	B	-0.0276318583637475	B	-0.0151755763217806	B	-0.0181336812674999	B	-0.009596237912774	B	-0.0136858401820063	B	-0.0187458861619234
1	6700001	6800000	B	-0.0199531372636556	B	-0.0262464042752981	B	-0.0110171921551227	B	-0.0139745697379112	A	0.0018383621936663	B	-0.0118703441694378	A	0.0020086760632693
1	6800001	6900000	B	-0.0117820808663964	B	-0.0157700069248676	B	-0.0118673956021666	B	-0.0161660015583038	B	-0.0062723997980356	B	-0.0082331169396638	B	-0.0140304481610655
1	6900001	7000000	B	-0.0125237442553043	B	-0.0134270126000046	B	-0.0130167715251445	B	-0.015742665156722	B	-0.0153238158673048	B	-0.0002573405799921	B	-0.0270725227892398
1	7000001	7100000	B	-0.0069553242065012	B	-0.0031780335120856	B	-0.0069849081337451	B	-0.0099681438878178	B	-0.0081913052126765	A	0.013518956489861	B	-0.0175099372863769
1	7100001	7200000	B	-0.0039792926982045	B	-0.0044714314863085	B	-0.0029159525875002	B	-0.0091149099171161	B	-0.002225799486041	A	0.020280523225665	B	-0.0092166112735867
1	7200001	7300000	B	-0.0157267097383737	B	-0.0180866345763206	B	-0.0100079663097858	B	-0.0132153378799557	B	-0.0114868301898241	A	0.0036474107764661	B	-0.0206660702824592
1	7300001	7400000	B	-0.0137121202424168	B	-0.0159679856151342	B	-0.0109971519559621	B	-0.0107891093939542	B	-0.0067701372317969	A	0.0059907590039074	B	-0.0177062954753637
1	7400001	7500000	B	-0.0199488587677478	B	-0.0214973948895931	B	-0.0120548447594046	B	-0.0154554806649684	B	-0.0115575119853019	A	0.0028075866866856	B	-0.0206628497689962
1	7500001	7600000	B	-0.0201213341206312	B	-0.0236218310892581	B	-0.0123619493097066	B	-0.0161697063595056	B	-0.0143534736707806	B	-0.0012716525234282	B	-0.0260072089731693
1	7600001	7700000	B	-0.0228108037263155	B	-0.0250771362334489	B	-0.0141428969800472	B	-0.0131621910259127	B	-0.0202818345278501	B	-0.0057504451833665	B	-0.0284073036164045
1	7700001	7800000	B	-0.0192305538803339	B	-0.0237128548324108	B	-0.0146045973524451	B	-0.0151597457006573	B	-0.0191466156393289	B	-0.0039376546628773	B	-0.0293784905225038
1	7800001	7900000	B	-0.021679176017642	B	-0.025623895227909	B	-0.0148641755804419	B	-0.017565656453371	B	-0.0219631381332874	B	-0.0119549194350838	B	-0.0301481075584888
1	7900001	8000000	B	-0.0214190110564231	B	-0.0222032405436038	B	-0.0142634827643632	B	-0.0156346186995506	B	-0.0180882960557937	B	-0.0096147805452346	B	-0.0284511297941207
1	8000001	8100000	B	-0.0214078593999147	B	-0.024955615401268	B	-0.0147818122059106	B	-0.0149788400158286	B	-0.0222079083323478	B	-0.0091500533744692	B	-0.029132941737771
1	8100001	8200000	B	-0.0209932904690504	B	-0.0236777514219284	B	-0.013091173954308	B	-0.0149725601077079	B	-0.0201230701059103	B	-0.0084534883499145	B	-0.028854614123702
1	8200001	8300000	B	-0.0196360684931278	B	-0.0205684024840593	B	-0.0153396818786859	B	-0.0141950491815805	B	-0.0180776268243789	B	-0.0092054437845945	B	-0.027211096137762
1	8300001	8400000	B	-0.0234161429107189	B	-0.0260306242853403	B	-0.0166407134383916	B	-0.0187697168439626	B	-0.0208254400640726	B	-0.0112349102273583	B	-0.0282315388321876
1	8400001	8500000	B	-0.0235468801110982	B	-0.0262465421110391	B	-0.0151258995756506	B	-0.0163818597793579	B	-0.0176276955753564	B	-0.0029657741542905	B	-0.0240710787475109
1	8500001	8600000	B	-0.0216825790703296	B	-0.0243061911314725	B	-0.014979638159275	B	-0.016771288588643	B	-0.0167018864303827	A	0.0080793276429176	B	-0.022360561415553
1	8600001	8700000	B	-0.0185038559138774	B	-0.0173299331218004	B	-0.013315419666469	B	-0.0129443127661943	B	-0.0160914082080125	B	-0.0016985924448817	B	-0.021675145253539
1	8700001	8800000	B	-0.0181038361042737	B	-0.0187988262623548	B	-0.0138297174125909	B	-0.0161156058311462	B	-0.0146411666646599	B	-0.0044797812588512	B	-0.0211459845304489
1	8800001	8900000	B	-0.0216087084263563	B	-0.0200725551694631	B	-0.0139212142676115	B	-0.0167686995118856	B	-0.0122541915625333	B	-0.0056505440734326	B	-0.0179581046104431
1	8900001	9000000	B	-0.0222593154758214	B	-0.0231228042393922	B	-0.0167418513447046	B	-0.0148478457704186	B	-0.0076631605625152	B	-0.0014724326319992	B	-0.0150091517716646
1	9000001	9100000	B	-0.0186188295483589	B	-0.0214141383767128	B	-0.0162930283695459	B	-0.0151366982609033	B	-0.0122717879712581	B	-0.008659110404551	B	-0.0178786516189575
1	9100001	9200000	B	-0.0208758153021335	B	-0.0254865661263465	B	-0.0161510799080133	B	-0.017708845436573	B	-0.0166808329522609	B	-0.0115118827670812	B	-0.0202064681798219
1	9200001	9300000	B	-0.0200457889586687	B	-0.024039339274168	B	-0.0148189216852188	B	-0.0145219294354319	B	-0.0170546229928731	B	-0.0075191692449152	B	-0.0196284279227256
1	9300001	9400000	B	-0.023739892989397	B	-0.0247819554060697	B	-0.0151433376595377	B	-0.0187199134379625	B	-0.0184698142111301	A	0.0001464006054447	B	-0.0236335434019565
1	9400001	9500000	B	-0.0203634109348058	B	-0.0220841821283102	B	-0.0133982775732874	B	-0.0153866745531558	B	-0.0169510412961244	A	0.0023911600001156	B	-0.023210983723402
1	9500001	9600000	B	-0.0006842520670033	B	-0.0074459766037762	B	-5.23036e+10	B	-0.0061001200228929	A	0.0002683633938431	A	0.0161962378770113	B	-0.0095220254734158
1	9600001	9700000	A	0.015493132174015	A	0.0022166995331645	A	0.0092094494029879	A	0.0027660015039145	A	0.0174957178533077	A	0.0286944508552551	B	-0.001447424176149
1	9700001	9800000	A	0.0189142301678657	A	0.0112233767285943	A	0.0125827109441161	A	0.0092595908790826	A	0.0159720741212368	A	0.0330002345144748	A	0.001091141719371
1	9800001	9900000	A	0.0199075415730476	A	0.0090284375473856	A	0.0134215326979756	A	0.0031972217839211	A	0.0100013436749577	A	0.0331465303897857	B	-0.0138792637735605
1	9900001	10000000	A	0.0185943860560655	A	0.0101488670334219	A	0.0169904399663209	A	0.0078967493027448	A	0.0155201274901628	A	0.034364603459835	B	-0.0025652493350207
1	10000001	10100000	A	0.0147712137550115	A	0.0122931348159909	A	0.0167729165405035	A	0.0142888277769088	A	0.019753785803914	A	0.0340499356389045	A	0.0072808773256838
1	10100001	10200000	A	0.0053670755587518	A	0.0135237900540232	A	0.0110915908589959	A	0.0084802471101284	A	0.0149822058156132	A	0.0272410996258258	A	0.0078724715858697
1	10200001	10300000	B	-0.012389738112688	A	0.0015005456516519	A	0.0004320852167438	B	-0.0049808593466877	A	0.0014095300575718	A	0.0051722102798521	B	-0.0043714777566492
1	10300001	10400000	B	-0.0218156818300485	B	-0.0149524770677089	B	-0.0103584611788392	B	-0.0157620925456285	B	-0.0176560878753662	B	-0.0040306686423718	B	-0.024284329265356
1	10400001	10500000	B	-0.0212920699268579	B	-0.0225715301930904	B	-0.0119829243049025	B	-0.0146891670301556	B	-0.0188866928219795	B	-0.0091689433902502	B	-0.0240458417683839
1	10500001	10600000	B	-0.0272491015493869	B	-0.0317203253507614	B	-0.0143643002957105	B	-0.0170675087720155	B	-0.0199618283659219	B	-0.0086793815717101	B	-0.0246232021600008
1	10600001	10700000	B	-0.0264244209975004	B	-0.0291449967771768	B	-0.0135394157841801	B	-0.01730602607131	B	-0.0181511938571929	A	0.0016352258389815	B	-0.022904884070158
1	10700001	10800000	B	-0.0234788134694099	B	-0.0254058092832565	B	-0.0090582910925149	B	-0.0124830063432455	B	-0.0129936560988426	B	-0.0013801006134599	B	-0.0174581501632928
1	10800001	10900000	B	-0.0211565699428319	B	-0.0289148278534412	B	-0.0140102645382285	B	-0.0176999270915985	B	-0.0111746592447161	A	0.0049411025829613	B	-0.0220703855156898
1	10900001	11000000	B	-0.0189021248370409	B	-0.0284358114004135	B	-0.0104813566431403	B	-0.0140065969899296	B	-0.0089976834133267	A	0.0049548889510333	B	-0.0223298724740743
1	11000001	11100000	B	-0.0216552056372165	B	-0.0284737814217805	B	-0.0087441792711615	B	-0.0129746636375784	B	-0.0033694836311042	A	0.0099232969805598	B	-0.0213452037423849
1	11100001	11200000	B	-0.0214285608381032	B	-0.0278926193714141	B	-0.0100110759958624	B	-0.0127115007489919	B	-0.0046427897177636	A	0.0101839993149042	B	-0.0212149862200021
1	11200001	11300000	B	-0.0208659954369068	B	-0.0274685956537723	B	-0.0116315400227904	B	-0.0139662586152553	B	-0.0086368769407272	A	0.0145588256418704	B	-0.023364420980215
1	11300001	11400000	B	-0.0238064508885145	B	-0.0290230009704828	B	-0.010938418097794	B	-0.0157801210880279	B	-0.0083497278392314	A	0.0226725749671459	B	-0.0246858708560466
1	11400001	11500000	B	-0.0250678323209285	B	-0.0294441822916269	B	-0.0167865622788667	B	-0.0173371285200119	B	-0.0113061042502522	A	0.0222031362354755	B	-0.0251844301819801
1	11500001	11600000	B	-0.0237385760992765	B	-0.0283123794943094	B	-0.0135428737848997	B	-0.0165049657225608	B	-0.0106735695153474	A	0.0141692897304892	B	-0.0244087241590023
1	11600001	11700000	B	-0.016043271869421	B	-0.0104412576183676	B	-0.0069818976335227	B	-0.0106135159730911	B	-0.002428350970149	A	0.0020906312856823	B	-0.01561657525599
1	11700001	11800000	B	-0.01807233504951	B	-0.0020616985857486	B	-0.0093618957325816	B	-0.0127107752487063	A	0.0005236192955635	B	-0.0047027962282299	B	-0.0205443482846021
1	11800001	11900000	B	-0.020000372081995	B	-0.0063681276515126	B	-0.0112037463113665	B	-0.0128481267020106	B	-0.0025994656607508	B	-0.0068532228469848	B	-0.0246239136904478
1	11900001	12000000	B	-0.0184935461729764	B	-0.0048554637469351	B	-0.0069365487433969	B	-0.0121634118258953	A	0.002411926863715	B	-0.0098940022289752	B	-0.0232534240931272
1	12000001	12100000	B	-0.0162983555346727	B	-0.0033447702880948	B	-0.0063367788679897	B	-0.0132799614220857	A	0.0068670641630887	B	-0.0062926323153078	B	-0.0207308996468782
1	12100001	12200000	B	-0.0177078992128372	B	-0.0047714272513985	B	-0.0074103469960391	B	-0.0138118751347064	A	0.002820205874741	B	-0.0057786484248936	B	-0.0216877125203609
1	12200001	12300000	B	-0.0141712864860892	B	-0.0012733157491311	B	-0.0077780084684491	B	-0.0124985873699188	A	0.0012701720697805	B	-0.0051471632905304	B	-0.0202716682106256
1	12300001	12400000	B	-0.0168047007173299	A	0.0023716664873063	B	-0.0060866181738674	B	-0.0101646203547716	A	0.0047347834333777	B	-0.0088777169585227	B	-0.0187212210148572
1	12400001	12500000	B	-0.0149214174598455	A	0.0078496253117918	B	-0.0037726080045104	B	-0.0104904919862747	A	0.0073518371209502	B	-0.0051902248524129	B	-0.0136389741674065
1	12500001	12600000	B	-0.0173014514148235	A	0.0022883461788296	B	-0.0022397860884666	B	-0.0116437617689371	A	0.0118217356503009	A	0.0012481668964028	B	-0.0033443237189203
1	12600001	12700000	B	-0.0141752604395151	A	0.0015043705934658	B	-0.0007793809636496	B	-0.0054991003125905	A	0.0162393748760223	A	0.0156364478170871	A	0.0031625344417989
1	12700001	12800000	B	-0.004748742096126	A	0.0156491324305534	A	0.0043395021930336	A	0.0043434458784759	A	0.0188588686287403	A	0.0300253853201866	A	0.0087166018784046
1	12800001	12900000	B	-0.009320973418653	A	0.0095117120072245	A	0.0041924491524696	A	0.0025544052477926	A	0.0099883899092674	A	0.0217100940644741	B	-0.0006258729263208
1	12900001	13000000	B	-0.0103434231132268	A	0.0006840069545432	A	0.0081116147339344	A	0.0011680267052724	A	0.0106460601091384	A	0.0256359782069921	A	0.0053092730231583
1	13000001	13100000	A	0.0019619117956608	A	0.0050192191265523	A	0.0158212576061487	A	0.0087990006431937	A	0.0156531780958175	A	0.0349347591400146	A	0.0095115937292575
1	13100001	13200000	A	0.0131534188985824	A	0.0143867088481783	A	0.0196631327271461	A	0.0170426238328218	A	0.0210228208452463	A	0.0345608294010162	A	0.017170988023281
1	13200001	13300000	A	0.0208569690585136	A	0.0150817539542913	A	0.018387246876955	A	0.0160112958401441	A	0.0232722014188766	A	0.0306328516453504	A	0.0220747217535972
1	13300001	13400000	A	0.0182601176202297	A	0.0144477235153317	A	0.0213924217969179	A	0.0175112169235944	A	0.0238884184509515	A	0.0306087993085384	A	0.0197452194988727
1	13400001	13500000	A	0.0107686202973127	A	0.0038548889569938	A	0.0184841733425855	A	0.0102175660431385	A	0.016585124656558	A	0.0225224643945693	A	0.0008277268498204
1	13500001	13600000	A	0.008112964220345	A	0.0020420430228114	A	0.0169028528034687	A	0.0092799663543701	A	0.013193848542869	A	0.0259436722844839	B	-0.0015764513518661
1	13600001	13700000	B	-0.0065494398586452	B	-0.013986462727189	A	0.0117647824808955	A	0.0013070843415334	A	0.0055561708286404	A	0.0262749176472425	B	-0.0136810019612312
1	13700001	13800000	B	-0.0167538151144981	B	-0.0226694922894239	A	0.00425277184695	B	-0.0070043005980551	B	-0.0073239039629697	A	0.0024167138617485	B	-0.0199214443564414
1	13800001	13900000	B	-0.0179268419742584	B	-0.0192178301513195	A	0.0017273859120905	B	-0.0028572718147188	A	0.000298177881632	B	-0.0011549517512321	B	-0.0108923306688666
1	13900001	14000000	B	-0.020083375275135	B	-0.028284478932619	A	0.0006325727445073	B	-0.0064665591344237	B	-0.0028577672783285	B	-0.006429677363485	B	-0.021777169778943
1	14000001	14100000	B	-0.0186976194381713	B	-0.0269992649555206	A	0.0031310026533901	B	-0.0063238707371056	A	0.0011986915487796	B	-0.0067105400376021	B	-0.0163061060011386
1	14100001	14200000	B	-0.0159396491944789	B	-0.0233828723430633	A	0.0081908609718084	A	0.0001571239554323	A	0.0117371836677193	A	0.0008546919561922	A	0.0001999639061978
1	14200001	14300000	B	-0.0135208303108811	B	-0.0216648112982511	A	0.0099903447553515	A	0.0037720173131674	A	0.0125755285844206	A	0.0109861306846141	A	0.0051420582458376
1	14300001	14400000	B	-0.0155767248943448	B	-0.0206204876303672	A	0.0072863423265516	B	-0.0034628417342901	A	0.0103492587804794	A	0.0083484165370464	B	-0.0032597358804196
1	14400001	14500000	B	-0.0161514580249786	B	-0.0208821408450603	A	0.0055806394666433	B	-0.0036977978888899	A	0.0092528350651264	A	0.0104473810642957	B	-0.0081019829958677
1	14500001	14600000	B	-0.0154922949150204	B	-0.0219554863870143	A	0.0072478936053812	A	0.0009146461379714	A	0.0047949673607945	A	0.0048783612437546	B	-0.0102751879021525
1	14600001	14700000	B	-0.0179089158773422	B	-0.02036864310503	A	0.0062615191563963	B	-4.97082e+10	B	-0.0033505214378237	A	0.0024023808073252	B	-0.0191479660570621
1	14700001	14800000	B	-0.0176996123045682	B	-0.0207483749836683	A	0.0021770801395177	B	-0.0053172069601714	B	-0.0071555562317371	A	0.0042352802120149	B	-0.0202338621020317
1	14800001	14900000	B	-0.0227248407900333	B	-0.0242645423859357	B	-0.0021658958867192	B	-0.0105006750673055	B	-0.014033100567758	B	-0.0013625079300254	B	-0.0253278817981481
1	14900001	15000000	B	-0.0229464806616306	B	-0.0227657947689294	B	-0.0067974673584103	B	-0.013205493800342	B	-0.0186284687370061	B	-0.0014033005572855	B	-0.0283908210694789
1	15000001	15100000	B	-0.0212156791239976	B	-0.0212299153208732	B	-0.0129249710589647	B	-0.0156160313636064	B	-0.0209536738693714	B	-0.0104734236374497	B	-0.0270537268370389
1	15100001	15200000	B	-0.0255029276013374	B	-0.0256580952554941	B	-0.0167533848434686	B	-0.0170419327914714	B	-0.0242195650935173	B	-0.012108264490962	B	-0.0305654928088188
1	15200001	15300000	B	-0.0216076858341693	B	-0.0145466728135943	B	-0.0102376965805888	B	-0.0132169546559453	B	-0.0214787870645523	B	-0.0111122280359268	B	-0.0271284990012645
1	15300001	15400000	B	-0.0235462393611669	B	-0.0179739091545343	B	-0.0091278906911611	B	-0.0135654965415596	B	-0.0203521773219108	B	-0.0134604778140783	B	-0.0237343851476907
1	15400001	15500000	B	-0.0219565220177173	B	-0.01462481636554	B	-0.0106034558266401	B	-0.0136320134624838	B	-0.0201769769191741	B	-0.0095841819420456	B	-0.0248025339096784
1	15500001	15600000	B	-0.0224863458424806	B	-0.0175572074949741	B	-0.011997302994132	B	-0.0127690630033612	B	-0.0213469211012125	B	-0.0096967536956071	B	-0.0245263371616601
1	15600001	15700000	B	-0.0206113513559103	B	-0.0119778523221611	B	-0.0070559051819145	B	-0.010400865226984	B	-0.0164223667234182	A	0.007007542066276	B	-0.0207188986241817
1	15700001	15800000	B	-0.0171558577567338	B	-0.0146137755364179	B	-0.0017555759986862	B	-0.0112308217212557	B	-0.0136785162612795	A	0.0211328230798244	B	-0.0205123201012611
1	15800001	15900000	B	-0.0073262816295027	B	-0.0036527554038912	A	0.0058683441020548	A	0.0008707222878001	A	0.000189143087482	A	0.0276078972965478	B	-0.0125573724508285
1	15900001	16000000	B	-0.0106837106868624	B	-0.0121429730206727	A	0.0025602355599403	B	-0.0051597943529486	B	-0.0085304379463195	A	0.0065521872602403	B	-0.0227551404386758
1	16000001	16100000	B	-0.0100394710898399	B	-0.0094721689820289	A	0.0051411953754723	B	-0.0053191524930298	B	-0.002587930066511	A	0.0123374918475747	B	-0.0090643567964434
1	16100001	16200000	B	-0.0061658504419028	A	0.0003113368002232	A	0.0110311619937419	A	0.0046599023044109	A	0.0063706645742058	A	0.0176097340881824	A	3.35587e+10
1	16200001	16300000	B	-0.0086441151797771	B	-0.0033922588918358	A	0.0111028281971812	A	0.0040346980094909	A	0.0004586699360515	B	-0.001746256952174	A	0.0009029017528519
1	16300001	16400000	B	-0.0111849848181009	B	-0.0019235434010624	A	0.0055197481997311	B	-0.0025899077299982	B	-0.0039091282524168	B	-0.0050865765661001	B	-0.0023429717402905
1	16400001	16500000	B	-0.0027713861782103	B	-0.0038882014341652	A	0.0033336684573441	B	-0.0053084888495504	B	-0.0035244352184236	A	0.0031765473540872	B	-0.0026039218064397
1	16500001	16600000	A	0.0040858034044504	A	0.0041150520555675	A	0.0088440049439668	A	0.00226806034334	A	0.0120299672707915	A	0.0183678623288869	A	0.0086033158004283
1	16600001	16700000	A	0.008125877007842	A	0.012705098837614	A	0.0073142126202583	A	0.004225387237966	A	0.0115851713344454	A	0.0246170628815889	A	0.0029529843013733
1	16700001	16800000	B	-0.0079679284244775	B	-0.0103967497125267	B	-0.0057729789987206	B	-0.0128115015104413	B	-0.0155118145048618	B	-0.0013077518669888	B	-0.0269096028059721
1	16800001	16900000	B	-0.0197752006351947	B	-0.0263276938349008	B	-0.0177756622433662	B	-0.0185509417206048	B	-0.0215624812990427	B	-9.77818e+09	B	-0.0306889712810516
1	16900001	17000000	B	-0.0245665833353996	B	-0.0276543237268924	B	-0.0168925859034061	B	-0.0195408929139375	B	-0.0229188818484544	B	-0.0055896393023431	B	-0.0308558996766805
1	17000001	17100000	B	-0.0231295023113489	B	-0.0243300311267375	B	-0.0161069333553314	B	-0.0177060812711715	B	-0.0165029298514127	B	-0.0023526090662926	B	-0.0259185656905174
1	17100001	17200000	B	-0.0201819874346256	B	-0.0234072525054216	B	-0.016290919855237	B	-0.0173434801399707	B	-0.0171237755566835	A	0.0029421849176287	B	-0.0224973522126674
1	17200001	17300000	B	-0.0243971329182386	B	-0.0279697496443986	B	-0.0206887293606996	B	-0.0222255066037178	B	-0.0233931634575128	A	0.0042919972911477	B	-0.0316077694296836
1	17300001	17400000	B	-0.0269743185490369	B	-0.0295686740428209	B	-0.0203958451747894	B	-0.0222812946885824	B	-0.0244887135922908	B	-0.002974305069074	B	-0.032025147229433
1	17400001	17500000	B	-0.0253397449851036	B	-0.0307394042611122	B	-0.0217639915645122	B	-0.0237167589366436	B	-0.0214088913053274	B	-0.0015046461485326	B	-0.0314516387879848
1	17500001	17600000	B	-0.0257619805634021	B	-0.0291577130556106	B	-0.0197985731065273	B	-0.0229168012738227	B	-0.0248294454067945	B	-0.0073461770080029	B	-0.0327526070177555
1	17600001	17700000	B	-0.0224545989185571	B	-0.0275668520480394	B	-0.0176254417747259	B	-0.0204813815653324	B	-0.0202848818153142	B	-0.0022957688197493	B	-0.0308645665645599
1	17700001	17800000	B	-0.0261629112064838	B	-0.0301513336598873	B	-0.0184254143387079	B	-0.0228879451751709	B	-0.0235336069017648	B	-0.0057893190532922	B	-0.0323554798960685
1	17800001	17900000	B	-0.0293522924184799	B	-0.0333469584584236	B	-0.0236575454473495	B	-0.0260701179504394	B	-0.0254266187548637	B	-0.0098083652555942	B	-0.033153798431158
1	17900001	18000000	B	-0.0254393480718135	B	-0.0275839399546384	B	-0.0194771103560924	B	-0.0193398911505937	B	-0.0242778733372688	B	-0.0031036201398819	B	-0.0321537069976329
1	18000001	18100000	B	-0.0243689659982919	B	-0.0273373387753963	B	-0.0194561351090669	B	-0.0191228352487087	B	-0.0223803110420703	B	-0.0013590685557574	B	-0.0297176521271467
1	18100001	18200000	B	-0.0294865760952234	B	-0.0320972874760627	B	-0.0224835965782403	B	-0.0255398582667112	B	-0.0231505557894706	B	-0.0077031031250953	B	-0.0309218782931566
1	18200001	18300000	B	-0.0290212035179138	B	-0.0319345407187938	B	-0.0201508607715368	B	-0.0260126534849405	B	-0.0226069241762161	B	-0.0034840526059269	B	-0.0312761962413787
1	18300001	18400000	B	-0.0264653824269771	B	-0.0299001727253198	B	-0.0203049480915069	B	-0.0223763920366764	B	-0.0162240155041217	B	-0.0085773989558219	B	-0.028022576123476
1	18400001	18500000	B	-0.0246010962873697	B	-0.0287156291306018	B	-0.0209114979952573	B	-0.021345967426896	B	-0.014445474371314	B	-0.017400762066245	B	-0.0285270530730485
1	18500001	18600000	B	-0.0260616559535264	B	-0.0289065670222044	B	-0.0212460663169622	B	-0.0231208000332117	B	-0.0181526355445384	B	-0.0168593097478151	B	-0.0298830848187208
1	18600001	18700000	B	-0.0266482420265674	B	-0.0305313952267169	B	-0.0217837840318679	B	-0.0244552455842494	B	-0.019501743838191	B	-0.0144570814445614	B	-0.031308326870203
1	18700001	18800000	B	-0.0291895922273397	B	-0.0316882506012916	B	-0.0232522748410701	B	-0.0262636095285415	B	-0.0235119145363569	B	-0.0173276383429765	B	-0.032473586499691
1	18800001	18900000	B	-0.0250390116125345	B	-0.0297246258705854	B	-0.02173288539052	B	-0.0224261190742254	B	-0.0229525119066238	B	-0.0152834597975015	B	-0.0321645587682724
1	18900001	19000000	B	-0.0265991110354661	B	-0.0303045846521854	B	-0.0197888053953647	B	-0.02371690236032	B	-0.0232562683522701	B	-0.0172374881803989	B	-0.032746035605669
1	19000001	19100000	B	-0.0258910898119211	B	-0.0291689615696668	B	-0.0187688563019037	B	-0.0179793406277894	B	-0.0248694978654384	B	-0.0113776782527565	B	-0.0332461446523666
1	19100001	19200000	B	-0.0218931660056114	B	-0.0258870385587215	B	-0.013335108757019	B	-0.0136388326063752	B	-0.0167559403926134	B	-0.0035534664057195	B	-0.0302939768880605
1	19200001	19300000	B	-0.0180396419018507	B	-0.0181814339011907	B	-0.008346383459866	B	-0.0040901214815676	B	-0.0004791820829268	A	0.0023308603558689	B	-0.0203583370894193
1	19300001	19400000	B	-0.0242784637957811	B	-0.0266815815120935	B	-0.0175651386380195	B	-0.0161548908799886	B	-0.0150230405852198	B	-0.0132414968684315	B	-0.0302310399711132
1	19400001	19500000	B	-0.0224318690598011	B	-0.0262717548757791	B	-0.0161365009844303	B	-0.0179058853536844	B	-0.0157120339572429	B	-0.016605382785201	B	-0.0302397701889276
1	19500001	19600000	B	-0.0257283300161361	B	-0.0280963722616434	B	-0.0169163569808006	B	-0.0166210737079381	B	-0.0146379666402935	B	-0.0198031011968851	B	-0.0290887560695409
1	19600001	19700000	B	-0.0248915608972311	B	-0.0283329598605632	B	-0.016932550817728	B	-0.0177448000758886	B	-0.0115867769345641	B	-0.0212777070701122	B	-0.0259861145168542
1	19700001	19800000	B	-0.0230631679296493	B	-0.0271268840879201	B	-0.0145755009725689	B	-0.0152233969420194	B	-0.0101576838642358	B	-0.0207646880298852	B	-0.0263089947402477
1	19800001	19900000	B	-0.0219862554222345	B	-0.0262499656528234	B	-0.0137035511434078	B	-0.0164628755301237	B	-0.0080887591466307	B	-0.0192817915230989	B	-0.0250450633466243
1	19900001	20000000	B	-0.0209019016474485	B	-0.0257132668048143	B	-0.0149789312854409	B	-0.0149735417217016	B	-0.001345322234556	B	-0.0197027493268251	B	-0.0238909218460321
1	20000001	20100000	B	-0.0237728469073772	B	-0.0270288567990064	B	-0.0149417361244559	B	-0.018742261454463	B	-0.0118168471381068	B	-0.020173080265522	B	-0.0280500911176204
1	20100001	20200000	B	-0.0258431397378444	B	-0.028247071430087	B	-0.0147112226113677	B	-0.0190129019320011	B	-0.0095575898885726	B	-0.02117520570755	B	-0.028268190100789
1	20200001	20300000	B	-0.0229810941964387	B	-0.0265430845320224	B	-0.0127355940639972	B	-0.0153594613075256	B	-0.008179947733879	B	-0.0171649735420942	B	-0.0264320075511932
1	20300001	20400000	B	-0.0233224797993898	B	-0.027779072523117	B	-0.0132141970098018	B	-0.0175794884562492	B	-0.0131965698674321	B	-0.013382576406002	B	-0.0282571204006671
1	20400001	20500000	B	-0.0204842835664749	B	-0.0234370306134223	B	-0.0107744261622428	B	-0.0127623714506626	B	-0.0128633277490735	B	-0.0087064271792769	B	-0.0272086691111326
1	20500001	20600000	B	-0.0215561725199222	B	-0.0256210621446371	B	-0.0100925592705607	B	-0.0161240417510271	B	-0.0182540342211723	B	-0.0067157442681491	B	-0.0301772728562355
1	20600001	20700000	B	-0.0135477799922227	B	-0.0236528180539608	B	-0.0100270118564367	B	-0.0136069199070334	B	-0.0190749298781156	B	-0.0031539865303784	B	-0.0318772830069065
1	20700001	20800000	B	-0.0080599216744303	B	-0.0150420665740966	B	-0.0003016256378032	B	-0.003975092433393	B	-0.0059633259661495	A	0.0223818849772214	B	-0.0278122816234827
1	20800001	20900000	A	0.0076213246211409	B	-0.0013501368230208	A	0.0116891944780945	A	0.004411332309246	A	0.0138355614617466	A	0.0296606533229351	B	-0.0062718028202652
1	20900001	21000000	A	0.0088328197598457	A	0.0057987058535218	A	0.0143225733190774	A	0.0098495483398437	A	0.0150763131678104	A	0.0240313466638326	B	-0.0029759448952972
1	21000001	21100000	A	0.0132879447191953	A	0.0110590523108839	A	0.0166181176900863	A	0.0143346199765801	A	0.0121298618614673	A	0.021101702004671	B	-0.005294912494719
1	21100001	21200000	A	0.0033301205839961	B	-0.0017698908923193	A	0.0067966761998832	A	0.0027977917343378	B	-0.0017704649362713	A	0.014538369141519	B	-0.0184881575405597
1	21200001	21300000	A	0.0021100169979035	B	-0.0067903976887464	A	0.0025029594544321	B	-0.0022533962037414	B	-0.0069510689936578	A	0.0204529892653226	B	-0.0226399060338735
1	21300001	21400000	B	-0.0059598335064947	B	-0.0216501951217651	B	-0.0057431734167039	B	-0.0145761426538228	B	-0.0223423521965742	B	-0.0005163325113244	B	-0.0299693252891302
1	21400001	21500000	B	-0.0134454052895307	B	-0.021359784528613	B	-0.0047629931941628	B	-0.008992682211101	B	-0.014863695949316	B	-0.0102814249694347	B	-0.0221654362976551
1	21500001	21600000	B	-0.0166499931365251	B	-0.0258945599198341	B	-0.0088936742395162	B	-0.014418464154005	B	-0.0176486726850271	B	-0.0168831888586282	B	-0.0227424800395965
1	21600001	21700000	B	-0.0192350801080465	B	-0.0285455733537673	B	-0.010755643248558	B	-0.0140717690810561	B	-0.0195956975221633	B	-0.0190989654511213	B	-0.024478729814291
1	21700001	21800000	B	-0.018898444250226	B	-0.0259045772254467	B	-0.009434862062335	B	-0.0133222434669733	B	-0.0160241220146417	B	-0.0173185802996158	B	-0.0233906377106905
1	21800001	21900000	B	-0.0149835515767335	B	-0.0251632388681173	B	-0.00749749597162	B	-0.0125779444351792	B	-0.0106738256290555	B	-0.0166086535900831	B	-0.0225088894367218
1	21900001	22000000	B	-0.0135128982365131	B	-0.0190149750560522	B	-0.0073502343147993	B	-0.009635142982006	B	-0.0152691891416907	B	-0.015699254348874	B	-0.0236348900943994
1	22000001	22100000	B	-0.0194198228418827	B	-0.0220780223608016	B	-0.0066836662590503	B	-0.0151097420603036	B	-0.0233029965311288	B	-0.0159453283995389	B	-0.0317638181149959
1	22100001	22200000	B	-0.024154083803296	B	-0.028298070654273	B	-0.0112900668755173	B	-0.017931031063199	B	-0.0244857352226972	B	-0.0167464297264814	B	-0.0328314453363418
1	22200001	22300000	B	-0.0191030371934175	B	-0.0240847114473581	B	-0.0098360711708664	B	-0.0122762834653258	B	-0.0180884860455989	B	-0.0108094029128551	B	-0.0279380287975072
1	22300001	22400000	B	-0.0236246027052402	B	-0.0261249206960201	B	-0.0094333952292799	B	-0.0141085721552371	B	-0.0118700349703431	A	0.0047612865455448	B	-0.0219737254083156
1	22400001	22500000	B	-0.0213491562753915	B	-0.0247588939964771	B	-0.0097634186968207	B	-0.0137068657204508	B	-0.0120095824822783	A	0.0142129296436905	B	-0.0205642413347959
1	22500001	22600000	B	-0.0256956443190574	B	-0.0271565522998571	B	-0.0127756306901574	B	-0.0185841061174869	B	-0.0144642181694507	A	0.0004998417571187	B	-0.0199362076818943
1	22600001	22700000	B	-0.0210494138300418	B	-0.0229205712676048	B	-0.0171768087893724	B	-0.0177089627832174	B	-0.0154623873531818	B	-0.0140214441344141	B	-0.0185639094561338
1	22700001	22800000	B	-0.0237980205565691	B	-0.0260705687105655	B	-0.0172685459256172	B	-0.0192284174263477	B	-0.0200829692184925	B	-0.0169511046260595	B	-0.0231459233909845
1	22800001	22900000	B	-0.0239491835236549	B	-0.0276306271553039	B	-0.0178677160292863	B	-0.0188027825206518	B	-0.0235515460371971	B	-0.0156633853912353	B	-0.0296690519899129
1	22900001	23000000	B	-0.0235966108739376	B	-0.0281775835901498	B	-0.0173544362187385	B	-0.0207928009331226	B	-0.023136107251048	B	-0.0138513166457414	B	-0.0311454348266124
1	23000001	23100000	B	-0.018992131575942	B	-0.0245370548218488	B	-0.0130244884639978	B	-0.0205005686730146	B	-0.0204601008445024	B	-0.0149474078789353	B	-0.0296100974082946
1	23100001	23200000	B	-0.0162579361349344	B	-0.0241040233522653	B	-0.0153731191530823	B	-0.0178522355854511	B	-0.0165888853371143	B	-0.0102718928828835	B	-0.0260497760027647
1	23200001	23300000	B	-0.0053317458368837	B	-0.0169233512133359	B	-0.0085763316601514	B	-0.0097873182967305	B	-0.0016477153403684	A	0.003538402961567	B	-0.0151548190042376
1	23300001	23400000	B	-0.0184027832001447	B	-0.0172309502959251	B	-0.0075803496874868	B	-0.0112333474680781	B	-0.0033238276373595	A	0.0066165956668555	B	-0.0088999830186367
1	23400001	23500000	B	-0.0221515409648418	B	-0.0249700117856264	B	-0.0119316643103957	B	-0.0179631188511848	B	-0.0171183720231056	B	-0.0076883104629814	B	-0.0230832453817129
1	23500001	23600000	B	-0.0277183074504137	B	-0.0291488729417324	B	-0.0133389085531234	B	-0.019142085686326	B	-0.0161097198724746	B	-0.011482517234981	B	-0.0224074088037014
1	23600001	23700000	B	-0.0273386817425489	B	-0.0294272005558013	B	-0.0144142359495162	B	-0.0187808293849229	B	-0.0187089163810014	B	-0.0100662149488925	B	-0.0252907890826463
1	23700001	23800000	B	-0.0208509266376495	B	-0.0230072550475597	B	-0.0042327712289988	B	-0.0100158201530575	B	-0.0099769160151481	B	-0.0007051674765534	B	-0.0151908509433269
1	23800001	23900000	B	-0.0118864122778177	B	-0.0154016641899943	A	0.0032115664798766	B	-0.0036887060850858	A	0.0007726410403847	A	0.016211275011301	B	-0.0050554363988339
1	23900001	24000000	B	-0.0112465359270572	B	-0.0106322048231959	A	0.0067190104164183	B	-0.0025884516071528	A	0.0093210097402334	A	0.0267442539334297	B	-0.0008117676479741
1	24000001	24100000	B	-0.0103667462244629	B	-0.0036017952952533	A	0.0081332679837942	A	0.002659304998815	A	0.011730508878827	A	0.0249609854072332	A	0.002514568157494
1	24100001	24200000	B	-0.0162924937903881	B	-0.0122100412845611	A	0.0022926323581486	B	-0.0074461721815168	A	0.0026623278390616	A	0.0104378378018736	B	-0.005638850852847
1	24200001	24300000	B	-0.0217871759086847	B	-0.0252224635332822	B	-0.0060419170185923	B	-0.0121204061433672	B	-0.0079297414049506	B	-0.0040680514648556	B	-0.0155651168897748
1	24300001	24400000	B	-0.0242530405521392	B	-0.020560460165143	B	-0.0118095288053154	B	-0.0183132942765951	B	-0.0164126567542552	B	-0.0088237579911947	B	-0.0196027904748916
1	24400001	24500000	B	-0.0252902694046497	B	-0.0218570940196514	B	-0.0151205714792013	B	-0.0203713811933994	B	-0.0187956932932138	B	-0.0140868611633777	B	-0.0227429643273353
1	24500001	24600000	B	-0.0231061913073062	B	-0.0213154274970293	B	-0.0106967631727457	B	-0.0169460251927375	B	-0.0139816729351878	B	-0.0089702876284718	B	-0.0178185384720563
1	24600001	24700000	B	-0.0183275956660509	B	-0.0157037358731031	B	-0.0105088241398334	B	-0.0135344145819544	B	-0.0039680004119873	A	0.0004423873906489	B	-0.015250832773745
1	24700001	24800000	B	-0.0197874214500188	B	-0.0174368806183338	B	-0.013850555755198	B	-0.0160736721009016	B	-0.0091727590188384	B	-0.0002487566089257	B	-0.0127374771982431
1	24800001	24900000	B	-0.0231361556798219	B	-0.0249103214591741	B	-0.0191940739750862	B	-0.0222437363117933	B	-0.0181843545287847	B	-0.0147616770118474	B	-0.0170749966055154
1	24900001	25000000	B	-0.0252723768353462	B	-0.0228615570813417	B	-0.0198544524610042	B	-0.0247296690940856	B	-0.0147049510851502	B	-0.0123642245307564	B	-0.0098938308656215
1	25000001	25100000	B	-0.0250287689268589	B	-0.0214978326112031	B	-0.0204627718776464	B	-0.0225114654749631	B	-0.0087735895067453	B	-0.0079788193106651	B	-0.0018529088702052
1	25100001	25200000	B	-0.0255051348358392	B	-0.0213551018387079	B	-0.0198277998715639	B	-0.0235317554324865	B	-0.0070359013043344	B	-0.0078361630439758	B	-0.0002945316664408
1	25200001	25300000	B	-0.0267532020807266	B	-0.0247886981815099	B	-0.0205293651670217	B	-0.0237909965217113	B	-0.0155766941606998	B	-0.0124725643545389	B	-0.0059059546329081
1	25300001	25400000	B	-0.0253525208681821	B	-0.0259898174554109	B	-0.0208880864083766	B	-0.0242253746837377	B	-0.016639495268464	B	-0.019019553437829	B	-0.0107883848249912
1	25400001	25500000	B	-0.0252185631543397	B	-0.023621778935194	B	-0.0186464954167604	B	-0.0223706979304552	B	-0.0136594790965318	B	-0.0189939327538013	B	-0.0087159164249897
1	25500001	25600000	B	-0.0225356258451938	B	-0.0220461841672658	B	-0.0170629359781742	B	-0.0185688845813274	B	-0.0118395434692502	B	-0.0202461052685976	B	-0.0128480717539787
1	25600001	25700000	B	-0.0240241903811693	B	-0.0247035790234804	B	-0.0165491327643394	B	-0.021493699401617	B	-0.016349546611309	B	-0.0197513215243816	B	-0.014647171832621
1	25700001	25800000	B	-0.0254987087100744	B	-0.024120595306158	B	-0.0210420843213796	B	-0.024221496656537	B	-0.0191700998693704	B	-0.020391572266817	B	-0.0181298684328794
1	25800001	25900000	B	-0.0208792593330144	B	-0.0219579469412565	B	-0.0169967357069253	B	-0.0186747685074806	B	-0.0155178122222423	B	-0.0141096543520689	B	-0.0221090819686651
1	25900001	26000000	B	-0.0205476265400648	B	-0.021641906350851	B	-0.0205985885113477	B	-0.0236245300620794	B	-0.0256657674908638	B	-0.0182879660278558	B	-0.0309981200844049
1	26000001	26100000	B	-0.0224796161055564	B	-0.0217267181724309	B	-0.0196789130568504	B	-0.0218541640788316	B	-0.0274541825056076	B	-0.0194198284298181	B	-0.0320839583873748
1	26100001	26200000	B	-0.0241000596433877	B	-0.0249827951192855	B	-0.0219187121838331	B	-0.0217844471335411	B	-0.0274111721664667	B	-0.0206632204353809	B	-0.0324977189302444
1	26200001	26300000	B	-0.021011184900999	B	-0.0212513748556375	B	-0.0200952626764774	B	-0.0198076423257589	B	-0.0231887158006429	B	-0.015304822474718	B	-0.02943005412817
1	26300001	26400000	B	-0.0219041667878627	B	-0.0218251924961805	B	-0.0204612389206886	B	-0.0222617946565151	B	-0.0242110360413789	B	-0.0108019551262259	B	-0.0302481595426797
1	26400001	26500000	B	-0.018452113494277	B	-0.0179096776992082	B	-0.0171782281249761	B	-0.0191631391644477	B	-0.0243039727210998	B	-0.0140841277316212	B	-0.030839143320918
1	26500001	26600000	B	-0.0214715413749218	B	-0.0215824730694293	B	-0.0193531271070241	B	-0.0213184095919132	B	-0.0258578900247812	B	-0.0174131896346807	B	-0.0316759869456291
1	26600001	26700000	B	-0.023418590426445	B	-0.0197733044624328	B	-0.0211379379034042	B	-0.0208630245178937	B	-0.0268046297132968	B	-0.0210094880312681	B	-0.0321511067450046
1	26700001	26800000	B	-0.0179485492408275	B	-0.0161006711423397	B	-0.0187389459460973	B	-0.0188911072909832	B	-0.0274367574602365	B	-0.0183526687324047	B	-0.032417856156826
1	26800001	26900000	B	-0.0173128452152013	B	-0.0143096791580319	B	-0.0171351190656423	B	-0.0200688242912292	B	-0.026890704408288	B	-0.0166361089795827	B	-0.0325229875743389
1	26900001	27000000	B	-0.0193570125848054	B	-0.0188131351023912	B	-0.0180439911782741	B	-0.0211386028677225	B	-0.0277131497859954	B	-0.0181190855801105	B	-0.0328757539391517
1	27000001	27100000	B	-0.0180109497159719	B	-0.0202304534614086	B	-0.0168625600636005	B	-0.0196923688054084	B	-0.0282931346446275	B	-0.0185922905802726	B	-0.0326165147125721
1	27100001	27200000	B	-0.0158077385276556	B	-0.0166576337069273	B	-0.0157188288867473	B	-0.0195147916674613	B	-0.0278166178613901	B	-0.0174441654235124	B	-0.031255979090929
1	27200001	27300000	B	-0.017914256080985	B	-0.0193110574036836	B	-0.0176576841622591	B	-0.0188566613942384	B	-0.0286096781492233	B	-0.0167314130812883	B	-0.031655728816986
1	27300001	27400000	B	-0.0204170756042003	B	-0.0218160804361104	B	-0.0202861819416284	B	-0.0197300519794225	B	-0.0285538677126169	B	-0.0192873664200305	B	-0.031572725623846
1	27400001	27500000	B	-0.0220005344599485	B	-0.0226407907903194	B	-0.0191340371966362	B	-0.0200336910784244	B	-0.028991375118494	B	-0.0202306043356657	B	-0.0313468426465988
1	27500001	27600000	B	-0.018151095137	B	-0.0198001135140657	B	-0.01936019025743	B	-0.02004836499691	B	-0.0288700200617313	B	-0.0195255503058433	B	-0.030553113669157
1	27600001	27700000	B	-0.018947709351778	B	-0.0177871342748403	B	-0.0182559695094823	B	-0.0182027705013752	B	-0.0286010466516017	B	-0.0212811455130577	B	-0.0304049588739871
1	27700001	27800000	B	-0.0167320426553487	B	-0.0142645658925175	B	-0.0151662221178412	B	-0.0184463802725076	B	-0.0277124438434839	B	-0.0206200145184993	B	-0.0287665445357561
1	27800001	27900000	B	-0.0184671748429536	B	-0.0158555582165718	B	-0.0180775430053472	B	-0.0194875728338956	B	-0.0288377609103918	B	-0.0212491657584905	B	-0.0291329510509967
1	27900001	28000000	B	-0.0180366337299346	B	-0.0134051917120814	B	-0.0167196169495582	B	-0.0201321449130773	B	-0.0284552481025457	B	-0.0214691665023565	B	-0.0288239140063524
1	28000001	28100000	B	-0.0187461320310831	B	-0.0076791811734437	B	-0.0153837222605943	B	-0.0193314235657453	B	-0.0273772459477186	B	-0.0207821112126112	B	-0.0287150032818317
1	28100001	28200000	B	-0.0194184072315692	B	-0.0139650618657469	B	-0.0175039116293191	B	-0.0205661822110414	B	-0.0282147508114576	B	-0.01947533339262	B	-0.0287616737186908
1	28200001	28300000	B	-0.0188729502260684	B	-0.0158612914383411	B	-0.0155486324802041	B	-0.0191124472767114	B	-0.0279613528400659	B	-0.0168125759810209	B	-0.0283103417605161
1	28300001	28400000	B	-0.0184560734778642	B	-0.0175731908529996	B	-0.0148454094305634	B	-0.0199337471276521	B	-0.0279331505298614	B	-0.0146241094917058	B	-0.0294459704309701
1	28400001	28500000	B	-0.0175624080002307	B	-0.0201945453882217	B	-0.0162767935544252	B	-0.0179982148110866	B	-0.0275923423469066	B	-0.0173544865101575	B	-0.0299250856041908
1	28500001	28600000	B	-0.0209146179258823	B	-0.0208675861358642	B	-0.0154090384021401	B	-0.0181152988225221	B	-0.0268749743700027	B	-0.0199650973081588	B	-0.0298980493098497
1	28600001	28700000	B	-0.0196987930685281	B	-0.0208923742175102	B	-0.0152408210560679	B	-0.0197366438806056	B	-0.0278882645070552	B	-0.0154169956222176	B	-0.0294822566211223
1	28700001	28800000	B	-0.0219108723104	B	-0.0237587485462427	B	-0.0159780662506818	B	-0.0221102405339479	B	-0.0286340322345495	B	-0.0192602220922708	B	-0.0288278628140687
1	28800001	28900000	B	-0.0209977347403764	B	-0.0214314050972461	B	-0.0152001492679119	B	-0.0193248633295297	B	-0.0283364281058311	B	-0.0195730607956647	B	-0.0291705541312694
1	28900001	29000000	B	-0.0203626435250043	B	-0.0210311077535152	B	-0.0159236136823892	B	-0.0182146355509758	B	-0.0285331662744283	B	-0.0201936345547437	B	-0.0279942993074655
1	29000001	29100000	B	-0.021083490923047	B	-0.0230828505009412	B	-0.0167589113116264	B	-0.0185899138450622	B	-0.0283611994236707	B	-0.0198848396539688	B	-0.02729351259768
1	29100001	29200000	B	-0.0184422340244054	B	-0.0210616439580917	B	-0.0145094599574804	B	-0.0186720453202724	B	-0.0277945604175329	B	-0.0194134227931499	B	-0.0269215945154428
1	29200001	29300000	B	-0.018650509417057	B	-0.0238454658538103	B	-0.0147849209606647	B	-0.0173660442233085	B	-0.0281583443284034	B	-0.02069085650146	B	-0.0267833583056926
1	29300001	29400000	B	-0.0193278081715106	B	-0.0226602721959352	B	-0.0158028788864612	B	-0.018683647736907	B	-0.0270280856639146	B	-0.0202777329832315	B	-0.0259001571685075
1	29400001	29500000	B	-0.0186111163347959	B	-0.0206711217761039	B	-0.013637545518577	B	-0.015912689268589	B	-0.0268946513533592	B	-0.0175626724958419	B	-0.0261617004871368
1	29500001	29600000	B	-0.0205804985016584	B	-0.0229087080806493	B	-0.0173131078481674	B	-0.0193422585725784	B	-0.0273281000554561	B	-0.0207407511770725	B	-0.0259428769350051
1	29600001	29700000	B	-0.0188874714076519	B	-0.0210288204252719	B	-0.013947894796729	B	-0.0167764201760292	B	-0.0258279293775558	B	-0.019975708797574	B	-0.0257913768291473
1	29700001	29800000	B	-0.0181033760309219	B	-0.0238906797021627	B	-0.0149417342618107	B	-0.0153167331591248	B	-0.0270745288580656	B	-0.0173033457249403	B	-0.0257847122848033
1	29800001	29900000	B	-0.0213035233318805	B	-0.0238104537129402	B	-0.0157257467508316	B	-0.0210670586675405	B	-0.0284860450774431	B	-0.0176670588552951	B	-0.0263451375067234
1	29900001	30000000	B	-0.0191938653588295	B	-0.0215666498988866	B	-0.014107184484601	B	-0.018979949876666	B	-0.0281079374253749	B	-0.0149672906845808	B	-0.027033906430006
1	30000001	30100000	B	-0.0172756221145391	B	-0.0185930803418159	B	-0.0139961242675781	B	-0.0162655897438526	B	-0.0266400463879108	B	-0.0178967751562595	B	-0.027123725041747
1	30100001	30200000	B	-0.0161730889230966	B	-0.0134502705186605	B	-0.0136422086507081	B	-0.0151911051943898	B	-0.0261191166937351	B	-0.0200500693172216	B	-0.0275071319192647
1	30200001	30300000	B	-0.0203441008925437	B	-0.0206228885799646	B	-0.0147079871967434	B	-0.0183131787925958	B	-0.0258982386440038	B	-0.0171231310814619	B	-0.027854386717081
1	30300001	30400000	B	-0.0204392354935407	B	-0.0214403793215751	B	-0.0145602291449904	B	-0.0187364257872104	B	-0.025740684941411	B	-0.016212236136198	B	-0.0287044681608676
1	30400001	30500000	B	-0.0216426104307174	B	-0.0208294838666915	B	-0.0149039523676037	B	-0.0177934691309928	B	-0.0236872676759958	B	-0.0163783673197031	B	-0.0283873919397592
1	30500001	30600000	B	-0.0176312252879142	B	-0.015895826742053	B	-0.0126461647450923	B	-0.0142888147383928	B	-0.019925307482481	B	-0.0112959370017051	B	-0.0252781864255666
1	30600001	30700000	B	-0.0190855599939823	B	-0.0205172915011644	B	-0.015063202008605	B	-0.0173606611788272	B	-0.0227622017264366	B	-0.0146107347682118	B	-0.0276611316949129
1	30700001	30800000	B	-0.0190721713006496	B	-0.0222373865544796	B	-0.0126592852175235	B	-0.0183849167078733	B	-0.0206483472138643	A	0.000294254743494	B	-0.0270777307450771
1	30800001	30900000	B	-0.0056939627975225	B	-0.0075868205167353	B	-0.0027304410468786	B	-0.0064519746229052	B	-0.0099176988005638	A	0.0252193193882703	B	-0.0174401197582483
1	30900001	31000000	B	-0.016247134655714	B	-0.013952475041151	B	-0.006742010358721	B	-0.0163634624332189	B	-0.0154477544128894	A	0.0099772373214364	B	-0.0231271609663963
1	31000001	31100000	B	-0.0237804763019084	B	-0.0206138249486684	B	-0.0176619496196508	B	-0.0217690095305442	B	-0.0253790132701396	B	-0.012423601001501	B	-0.029323611408472
1	31100001	31200000	B	-0.0232449807226657	B	-0.0238718446344137	B	-0.0179884526878595	B	-0.02134595438838	B	-0.0246064569801092	B	-0.0115319536998867	B	-0.0293662566691637
1	31200001	31300000	B	-0.0263442378491163	B	-0.0292836800217628	B	-0.02049520611763	B	-0.0247648209333419	B	-0.0252336412668228	B	-0.0127286594361066	B	-0.0281082950532436
1	31300001	31400000	B	-0.0286992993205785	B	-0.0313030183315277	B	-0.02498659491539	B	-0.0299337580800056	B	-0.0284489355981349	B	-0.0168495681136846	B	-0.0266408324241638
1	31400001	31500000	B	-0.0278991721570491	B	-0.0301944706588983	B	-0.0246325191110372	B	-0.0264711938798427	B	-0.027634147554636	B	-0.0214252062141895	B	-0.0255310703068971
1	31500001	31600000	B	-0.0291846897453069	B	-0.0314273722469806	B	-0.0249801464378833	B	-0.0246192552149295	B	-0.0276991128921508	B	-0.0217438098043203	B	-0.0259372889995574
1	31600001	31700000	B	-0.0293225590139627	B	-0.0328516513109207	B	-0.0263087339699268	B	-0.0283905863761901	B	-0.029976574704051	B	-0.0177133753895759	B	-0.0262278877198696
1	31700001	31800000	B	-0.0294341016560792	B	-0.0314057096838951	B	-0.0271769575774669	B	-0.0289155542850494	B	-0.0291404537856578	B	-0.0193402785807847	B	-0.0264306385070085
1	31800001	31900000	B	-0.027477603405714	B	-0.0285971295088529	B	-0.0241880118846893	B	-0.0264930445700883	B	-0.0289946664124727	B	-0.020624341443181	B	-0.0265892762690782
1	31900001	32000000	B	-0.0280652400106191	B	-0.0297888126224279	B	-0.0232958663254976	B	-0.0265977531671524	B	-0.0291971266269683	B	-0.0197694413363933	B	-0.0263149850070476
1	32000001	32100000	B	-0.0274709891527891	B	-0.0291005596518516	B	-0.0244333297014236	B	-0.0263291113078594	B	-0.0286211054772138	B	-0.0193815827369689	B	-0.0270763617008924
1	32100001	32200000	B	-0.0253019295632839	B	-0.0273767337203025	B	-0.0220567639917135	B	-0.0234417989850044	B	-0.0280553214251995	B	-0.0178226064890623	B	-0.0271284878253936
1	32200001	32300000	B	-0.027001554146409	B	-0.0290441215038299	B	-0.0213778764009475	B	-0.0250499248504638	B	-0.0282910410314798	B	-0.0186882242560386	B	-0.027373943477869
1	32300001	32400000	B	-0.0297809615731239	B	-0.030922669917345	B	-0.0221738964319229	B	-0.0275174435228109	B	-0.028559299185872	B	-0.0203406773507595	B	-0.0281914621591568
1	32400001	32500000	B	-0.0268232971429824	B	-0.0314758419990539	B	-0.0231752004474401	B	-0.0259648915380239	B	-0.0296985283493995	B	-0.0190588738769292	B	-0.0280403699725866
1	32500001	32600000	B	-0.0243968069553375	B	-0.0307876784354448	B	-0.0211696531623601	B	-0.0273811854422092	B	-0.0294581707566976	B	-0.0191958993673324	B	-0.0284807495772838
1	32600001	32700000	B	-0.0243259500712156	B	-0.0280389748513698	B	-0.0203228145837783	B	-0.0241911821067333	B	-0.0288125723600387	B	-0.0205086655914783	B	-0.0288815405219793
1	32700001	32800000	B	-0.0260306354612112	B	-0.0274833012372255	B	-0.0216735694557428	B	-0.0250723343342542	B	-0.0286796633154153	B	-0.0192363504320383	B	-0.0297857746481895
1	32800001	32900000	B	-0.0236228872090578	B	-0.0253062844276428	B	-0.0206559263169765	B	-0.0247948300093412	B	-0.0265238657593727	B	-0.0200194828212261	B	-0.0301887020468711
1	32900001	33000000	B	-0.0252582784742116	B	-0.0265270937234163	B	-0.0210547801107168	B	-0.0239616967737674	B	-0.0268469955772161	B	-0.0203525815159082	B	-0.0305567067116498
1	33000001	33100000	B	-0.0222025532275438	B	-0.0255599692463874	B	-0.0201399084180593	B	-0.0210238993167877	B	-0.0219617411494255	B	-0.016273932531476	B	-0.0291089732199907
1	33100001	33200000	B	-0.0258018523454666	B	-0.0277439523488283	B	-0.021104821935296	B	-0.0253709778189659	B	-0.0248351152986288	B	-0.0173179730772972	B	-0.028441758826375
1	33200001	33300000	B	-0.0260985475033521	B	-0.0287785157561302	B	-0.0194812547415494	B	-0.0247659627348184	B	-0.0231898222118616	B	-0.013929234817624	B	-0.024374047294259
1	33300001	33400000	B	-0.0252035297453403	B	-0.0298608504235744	B	-0.0205042604357004	B	-0.0245074089616537	B	-0.0222180914133787	B	-0.0157134123146533	B	-0.0225425995886325
1	33400001	33500000	B	-0.0190534424036741	B	-0.0229537617415189	B	-0.0139434812590479	B	-0.0199454482644796	B	-0.01797766238451	B	-0.0065832361578941	B	-0.0172461308538913
1	33500001	33600000	B	-0.0127475252375006	B	-0.0123256035149097	B	-0.0057621719315648	B	-0.0082858745008707	B	-0.0142152458429336	A	0.0122598968446254	B	-0.0166948568075895
1	33600001	33700000	A	0.0011470371391624	B	-0.0010169082088395	A	0.003899656701833	A	0.0001162809785455	B	-0.004416930489242	A	0.0292149968445301	B	-0.0152917774394154
1	33700001	33800000	A	0.015853988006711	A	0.0104829501360654	A	0.015055420808494	A	0.0126380361616611	A	0.0095935445278882	A	0.0347073078155517	B	-0.0055818269029259
1	33800001	33900000	A	0.0175924189388752	A	0.0163545385003089	A	0.0149747058749198	A	0.0113990968093276	A	0.0107318582013249	A	0.0342738702893257	B	-0.0039584198966622
1	33900001	34000000	A	0.019392630085349	A	0.018266936764121	A	0.0193685442209243	A	0.0141076501458883	A	0.0152150867506861	A	0.0348183549940586	A	0.0002525884774513
1	34000001	34100000	A	0.0246512126177549	A	0.0230187699198722	A	0.0239297971129417	A	0.0184174217283725	A	0.0216705054044723	A	0.034541729837656	A	0.0072132353670895
1	34100001	34200000	A	0.0261174794286489	A	0.0275108907371759	A	0.025765374302864	A	0.024646608158946	A	0.0233550239354372	A	0.0346084907650947	A	0.008262438699603
1	34200001	34300000	A	0.0276993475854396	A	0.0249950010329484	A	0.0251214336603879	A	0.0240435078740119	A	0.0231609921902418	A	0.0340077169239521	A	0.0080473013222217
1	34300001	34400000	A	0.0264448020607233	A	0.0229028277099132	A	0.021741509437561	A	0.0106650860980153	A	0.017094125971198	A	0.0280539207160472	A	0.0001796615397324
1	34400001	34500000	A	0.0286862552165985	A	0.0263240989297628	A	0.0242367051541805	A	0.0220858138054609	A	0.0210645571351051	A	0.0339302718639373	A	0.0031554109882563
1	34500001	34600000	A	0.0265020802617073	A	0.0176962353289127	A	0.0242169499397277	A	0.0195785332471132	A	0.0115813445299863	A	0.0326051004230976	B	-0.0001805295178201
1	34600001	34700000	A	0.02721275575459	A	0.0189056918025016	A	0.0233624596148729	A	0.0193192157894372	A	0.0134780304506421	A	0.0276071578264236	A	0.0006353469798341
1	34700001	34800000	A	0.0305706933140754	A	0.0246456712484359	A	0.0259540174156427	A	0.0241592414677143	A	0.0155381392687559	A	0.0226257909089326	A	0.0065824408084154
1	34800001	34900000	A	0.0300843473523855	A	0.0212485194206237	A	0.0242346730083227	A	0.0226905904710292	A	0.0148557219654321	A	0.0281408801674842	A	0.0042916215024888
1	34900001	35000000	A	0.012938623316586	A	0.0027070534415543	A	0.0089326230809092	A	0.0031408697832375	B	-0.0160804409533739	A	0.0019756492692977	B	-0.0231350772082805
1	35000001	35100000	A	0.0111923161894083	A	0.004136670846492	A	0.0052940393798053	B	-0.0012744066771119	B	-0.0170743949711322	B	-0.0035904503893107	B	-0.0248586218804121
1	35100001	35200000	A	0.0119544873014092	A	0.0019003036431968	A	0.0036388388834893	B	-0.0033569089137017	B	-0.0179588366299867	B	-0.0028303593862801	B	-0.0248743388801813
1	35200001	35300000	A	0.0123078674077987	A	0.0042367884889245	A	0.0065419669263064	A	0.0004900033236481	B	-0.0131962709128856	A	0.0027664394583553	B	-0.0222514104098081
1	35300001	35400000	A	0.0174997989088296	A	0.0085006728768348	A	0.0132410246878862	A	0.0054789367131888	B	-0.006329583004117	A	0.0021945186890661	B	-0.0191421881318092
1	35400001	35500000	A	0.0173189099878072	A	0.0141651732847094	A	0.0128957713022828	A	0.0069478163495659	A	0.0057869525626301	A	0.0051891226321458	B	-0.0148338032886385
1	35500001	35600000	A	0.0208364445716142	A	0.0184905044734478	A	0.0146875418722629	A	0.0062689930200576	A	0.0057801930233836	A	0.0021971419919282	B	-0.0134355723857879
1	35600001	35700000	A	0.023569643497467	A	0.0241349749267101	A	0.0180848725140094	A	0.0079457014799118	A	0.0137931322678923	A	0.0104104708880186	B	-0.0078397933393716
1	35700001	35800000	A	0.0260804593563079	A	0.0247305687516927	A	0.0197688862681388	A	0.0110056474804878	A	0.0178870931267738	A	0.0208715796470642	B	-0.0052039204165339
1	35800001	35900000	A	0.0285474024713039	A	0.0281612910330295	A	0.0221257079392671	A	0.0166893936693668	A	0.0227977614849805	A	0.0292789842933416	B	-0.0009938128059729
1	35900001	36000000	A	0.0285746678709983	A	0.0294391866773366	A	0.0230469927191734	A	0.0186093878000974	A	0.0240090321749448	A	0.0312373582273721	B	-0.000119649557746
1	36000001	36100000	A	0.0272429622709751	A	0.0281983520835638	A	0.0249993149191141	A	0.0166251827031373	A	0.0230518467724323	A	0.0326550342142581	B	-0.0003025633923243
1	36100001	36200000	A	0.0311121344566345	A	0.0308369565755128	A	0.0280415397137403	A	0.0281487200409173	A	0.0248405989259481	A	0.0349893756210804	A	0.0084826964884996
1	36200001	36300000	A	0.0329953432083129	A	0.0326827317476272	A	0.0316109992563724	A	0.0325509086251258	A	0.0282439310103654	A	0.0356460027396678	A	0.0139964278787374
1	36300001	36400000	A	0.0343759730458259	A	0.0345819592475891	A	0.0334587395191192	A	0.0343778915703296	A	0.0313556753098964	A	0.0360314846038818	A	0.0201314650475978
1	36400001	36500000	A	0.0353704579174518	A	0.0349680185317993	A	0.034093365073204	A	0.0343119949102401	A	0.0329656675457954	A	0.0358580872416496	A	0.0225761067122221
1	36500001	36600000	A	0.0334653593599796	A	0.0347227081656456	A	0.0318475663661956	A	0.0333850048482418	A	0.0339997000992298	A	0.0349449813365936	A	0.0255254432559013
1	36600001	36700000	A	0.0350690521299839	A	0.0340470150113105	A	0.0336039513349533	A	0.0345174819231033	A	0.0337181091308593	A	0.035377874970436	A	0.0266865696758031
1	36700001	36800000	A	0.0325419642031192	A	0.0317986905574798	A	0.0316146798431873	A	0.0314100980758667	A	0.0333271361887455	A	0.0350340232253074	A	0.0260661784559488
1	36800001	36900000	A	0.0313575156033039	A	0.0309056881815195	A	0.0312608554959297	A	0.0297843627631664	A	0.0327107794582843	A	0.0344787649810314	A	0.0262542888522148
1	36900001	37000000	A	0.0330821871757507	A	0.0311213620007038	A	0.030196389183402	A	0.0263829231262207	A	0.031106786802411	A	0.0333672799170017	A	0.0268110837787389
1	37000001	37100000	A	0.0319118425250053	A	0.0318089984357357	A	0.0299294907599687	A	0.0254826173186302	A	0.0306880641728639	A	0.0333586633205413	A	0.0261046830564737
1	37100001	37200000	A	0.0316365025937557	A	0.0295811165124177	A	0.029017312452197	A	0.024006312713027	A	0.0302388295531272	A	0.0332846157252788	A	0.0260311011224985
1	37200001	37300000	A	0.0296240244060754	A	0.0292839612811803	A	0.0285790730267763	A	0.0252192374318838	A	0.030428709462285	A	0.0317590683698654	A	0.0262484736740589
1	37300001	37400000	A	0.0320487059652805	A	0.0309413503855466	A	0.0302016288042068	A	0.0272898394614458	A	0.0306817665696144	A	0.0305188987404108	A	0.0257783029228448
1	37400001	37500000	A	0.0314585752785205	A	0.0301459915935993	A	0.0297574456781148	A	0.028866684064269	A	0.0309782736003398	A	0.032776266336441	A	0.0256504006683826
1	37500001	37600000	A	0.0332310795783996	A	0.0300897378474473	A	0.03116968087852	A	0.0295629110187292	A	0.0300897806882858	A	0.0321079902350902	A	0.0258492678403854
1	37600001	37700000	A	0.0314533561468124	A	0.02759032510221	A	0.0282974634319543	A	0.0271969828754663	A	0.0295229293406009	A	0.0316262990236282	A	0.0234117321670055
1	37700001	37800000	A	0.0318059772253036	A	0.0258310884237289	A	0.0280886366963386	A	0.023327263072133	A	0.0275526884943246	A	0.0251617319881916	A	0.0222309175878763
1	37800001	37900000	A	0.0322479307651519	A	0.0313483364880085	A	0.0306325405836105	A	0.0287256371229887	A	0.0312334336340427	A	0.0313782878220081	A	0.0237123519182205
1	37900001	38000000	A	0.0334837660193443	A	0.0336026288568973	A	0.0316537208855152	A	0.0290119778364896	A	0.0322447828948497	A	0.0341190733015537	A	0.0227146260440349
1	38000001	38100000	A	0.0325374379754066	A	0.0326316282153129	A	0.0333998017013073	A	0.0323380567133426	A	0.0305930320173501	A	0.0344251282513141	A	0.0220177434384822
1	38100001	38200000	A	0.0344785824418067	A	0.0339182950556278	A	0.0322869010269641	A	0.0325522720813751	A	0.0333358235657215	A	0.0321768932044506	A	0.0284971836954355
1	38200001	38300000	A	0.0335616283118724	A	0.0299188755452632	A	0.030435299500823	A	0.0299785360693931	A	0.0297997072339057	A	0.020925210788846	A	0.0292665846645832
1	38300001	38400000	A	0.030956957489252	A	0.0286933947354555	A	0.0277825444936752	A	0.0271114502102136	A	0.0283440705388784	A	0.0175342299044132	A	0.0292471218854188
1	38400001	38500000	A	0.0320480242371559	A	0.0319455377757549	A	0.0289552677422761	A	0.0304461624473333	A	0.029361467808485	A	0.0179341547191143	A	0.0297801624983549
1	38500001	38600000	A	0.032770786434412	A	0.0327555388212204	A	0.0310516823083162	A	0.0317965485155582	A	0.0297116097062826	A	0.0211495831608772	A	0.0300242956727743
1	38600001	38700000	A	0.0323789380490779	A	0.0318557284772396	A	0.0300850719213485	A	0.0294378343969583	A	0.0308590214699506	A	0.0251674987375736	A	0.0301157236099243
1	38700001	38800000	A	0.0319760404527187	A	0.03116993047297	A	0.0307137984782457	A	0.0273385196924209	A	0.0304320324212312	A	0.0220068395137786	A	0.0296739228069782
1	38800001	38900000	A	0.0324150919914245	A	0.0282891169190406	A	0.0317734144628047	A	0.0311498511582613	A	0.0323107093572616	A	0.0314695686101913	A	0.0279338546097278
1	38900001	39000000	A	0.0322995595633983	A	0.0276238918304443	A	0.0309405103325843	A	0.0264617521315813	A	0.029734781011939	A	0.0302555803209543	A	0.0222346354275941
1	39000001	39100000	A	0.0310844052582979	A	0.0254066493362188	A	0.0285703763365745	A	0.027592709288001	A	0.0257451310753822	A	0.0238142628222703	A	0.0077276965603232
1	39100001	39200000	A	0.0317256711423397	A	0.0245747100561857	A	0.0277791749686002	A	0.0221927892416715	A	0.0247372947633266	A	0.0253188125789165	A	0.0064060003496706
1	39200001	39300000	A	0.0331126935780048	A	0.0282372776418924	A	0.0300912205129861	A	0.025772176682949	A	0.0260115712881088	A	0.0282299425452947	A	0.0111161330714821
1	39300001	39400000	A	0.03318952023983	A	0.031664952635765	A	0.0314530916512012	A	0.0307624135166406	A	0.0294409450143575	A	0.0334270671010017	A	0.0166023392230272
1	39400001	39500000	A	0.0346111245453357	A	0.0311863031238317	A	0.0323796719312667	A	0.0310934633016586	A	0.031057521700859	A	0.0355420745909214	A	0.0197514966130256
1	39500001	39600000	A	0.034912634640932	A	0.0325429439544677	A	0.0321573056280612	A	0.033149104565382	A	0.0324161723256111	A	0.0359405949711799	A	0.0154694151133298
1	39600001	39700000	A	0.0324371978640556	A	0.0291154794394969	A	0.0310441292822361	A	0.0277401804924011	A	0.029422353953123	A	0.0332054123282432	A	0.0081908339634537
1	39700001	39800000	A	0.03131964802742	A	0.0279051978141069	A	0.0304604191333055	A	0.0262503083795309	A	0.0287564229220151	A	0.0297331903129816	A	0.0084245642647147
1	39800001	39900000	A	0.0312509499490261	A	0.0282148960977792	A	0.029055967926979	A	0.0251694861799478	A	0.0301361884921789	A	0.0323535241186618	A	0.0130932368338108
1	39900001	40000000	A	0.0303877349942922	A	0.0273192599415779	A	0.0292663853615522	A	0.027660459280014	A	0.0317081771790981	A	0.0326595306396484	A	0.0178818199783563
1	40000001	40100000	A	0.0252327416092157	A	0.0134241255000233	A	0.0258758720010519	A	0.0226056687533855	A	0.0274430084973573	A	0.0265500470995903	A	0.0032300231978297
1	40100001	40200000	A	0.0161381158977746	B	-0.0062014046125113	A	0.016122156754136	A	0.0055869403295218	A	0.0074307527393102	A	0.0094350492581725	B	-0.0204862263053655
1	40200001	40300000	A	0.0167790874838829	B	-0.0050638075917959	A	0.0166427474468946	A	0.0085965432226657	A	0.0033488925546407	A	0.0136040328070521	B	-0.021860459819436
1	40300001	40400000	A	0.0150182107463479	B	-0.0082826316356658	A	0.0151358088478446	A	0.0076277973130345	A	0.0097480388358235	A	0.0181220397353172	B	-0.0177309922873973
1	40400001	40500000	A	0.0094740660861134	B	-0.0218578875064849	A	0.0079868370667099	B	-0.0015308391302824	A	0.0003184857487212	A	0.0012409235350787	B	-0.0262117721140384
1	40500001	40600000	A	0.0064893937669694	B	-0.0210240967571735	A	0.007133834529668	B	-0.002920112805441	A	0.0051918746903538	A	1.46568e+10	B	-0.0202275216579437
1	40600001	40700000	A	0.0108449356630444	B	-0.0190562307834625	A	0.0093738678842782	A	0.0029868385754525	A	0.0129264695569872	A	0.0062110568396747	B	-0.0139019507914781
1	40700001	40800000	A	0.0047511188313364	B	-0.0205898601561784	A	0.009064863435924	A	0.0004621541302185	A	0.018387408927083	A	0.0055020204745233	B	-0.0054073967039585
1	40800001	40900000	B	-0.0056405230425298	B	-0.0204811561852693	A	0.0036187574733048	B	-0.0025511533021926	A	0.0192440450191497	A	0.0009653236484155	A	0.0074712485074996
1	40900001	41000000	B	-0.0218240860849618	B	-0.027738569304347	B	-0.0058620073832571	B	-0.0130858309566974	A	0.0202437248080968	B	-0.0059760115109384	A	0.0161839723587036
1	41000001	41100000	B	-0.025486147031188	B	-0.0307416506111621	B	-0.0082113686949014	B	-0.0168827325105667	A	0.0187889728695154	B	-0.0115007515996694	A	0.0157028511166572
1	41100001	41200000	B	-0.0253655686974525	B	-0.0282021425664424	B	-0.0088244136422872	B	-0.0148019501939415	A	0.0215306356549263	B	-0.0095335682854056	A	0.016113007441163
1	41200001	41300000	B	-0.0241001266986131	B	-0.0275167059153318	B	-0.0057677957229316	B	-0.0156924687325954	A	0.022320607677102	B	-0.0171277895569801	A	0.0183268394321203
1	41300001	41400000	B	-0.0236073732376098	B	-0.0273711662739515	B	-0.0084058828651905	B	-0.0152782015502452	A	0.025261752307415	B	-0.0156774241477251	A	0.0203524474054574
1	41400001	41500000	B	-0.0243222787976264	B	-0.027638791128993	B	-0.0128414286300539	B	-0.0166596919298172	A	0.0253842398524284	B	-0.0175664015114307	A	0.0202040970325469
1	41500001	41600000	B	-0.0273565407842397	B	-0.0308050587773323	B	-0.0136010786518454	B	-0.0184333603829145	A	0.0242519490420818	B	-0.0208291076123714	A	0.0189531426876783
1	41600001	41700000	B	-0.0264882948249578	B	-0.0298706199973821	B	-0.0120440041646361	B	-0.0147151174023747	A	0.0254869274795055	B	-0.0217014551162719	A	0.0206642020493745
1	41700001	41800000	B	-0.0232803057879209	B	-0.027778385207057	B	-0.0092382663860917	B	-0.0143410507589578	A	0.0259943753480911	B	-0.0192942526191473	A	0.0211695935577154
1	41800001	41900000	B	-0.0225527957081794	B	-0.027794862166047	B	-0.0046371240168809	B	-0.0141630182042717	A	0.0267665423452854	B	-0.0150884510949254	A	0.0225517991930246
1	41900001	42000000	B	-0.0232924316078424	B	-0.0274872556328773	B	-0.0061612403951585	B	-0.0141956638544797	A	0.02773267775774	B	-0.0135180251672863	A	0.0250049997121095
1	42000001	42100000	B	-0.022863982245326	B	-0.0289420075714588	B	-0.006274458952248	B	-0.0144132832065224	A	0.027643484994769	B	-0.0046983077190816	A	0.0247529800981283
1	42100001	42200000	B	-0.0209874529391527	B	-0.0256893187761306	B	-0.0037859776057302	B	-0.0107039958238601	A	0.027369512245059	B	-0.0051146065816283	A	0.0255405995994806
1	42200001	42300000	B	-0.0144254062324762	B	-0.0235815364867448	A	0.0028115836903452	B	-0.0068367323838174	A	0.0286881420761346	B	-0.0061036287806928	A	0.0259812287986278
1	42300001	42400000	B	-0.0179778523743152	B	-0.023765530437231	A	8.40696e+10	B	-0.0056188055314123	A	0.0283779297024011	B	-0.0076273991726338	A	0.0259735658764839
1	42400001	42500000	B	-0.0164875853806734	B	-0.0235329773277044	A	0.0066803167574107	B	-0.0009831297211349	A	0.0286275818943977	B	-0.0017095941584557	A	0.0266420189291238
1	42500001	42600000	B	-0.0155616393312811	B	-0.0230913553386926	A	0.0063532525673508	B	-0.0015222675865516	A	0.0286770015954971	B	-0.0024407720193266	A	0.0262427907437086
1	42600001	42700000	B	-0.0140461390838027	B	-0.0182126313447952	A	0.0078358575701713	A	0.0015609216643497	A	0.0275616515427827	A	0.0071151638403534	A	0.0243104975670576
1	42700001	42800000	B	-0.0129388542845845	B	-0.0193722378462553	A	0.0096899149939417	A	0.0045510800555348	A	0.0218989718705415	A	0.0106283435598015	A	0.0160851161926984
1	42800001	42900000	B	-0.0137577131390571	B	-0.0189996194094419	A	0.0129844658076763	A	0.0044878129847347	A	0.0257793273776769	A	0.0204252302646636	A	0.0181789305061101
1	42900001	43000000	B	-0.0125026274472475	B	-0.0227608904242515	A	0.0168357118964195	A	0.0068756924010813	A	0.0255108922719955	A	0.0175112355500459	A	0.016267942264676
1	43000001	43100000	B	-0.0071774167008697	B	-0.013797459192574	A	0.0159251987934112	A	0.0097433449700474	A	0.023466182872653	A	0.019105801358819	A	0.0143413571640849
1	43100001	43200000	A	0.0092247258871793	B	-0.0045416713692247	A	0.018377024680376	A	0.0106039606034755	A	0.0203449390828609	A	0.0259014889597892	A	0.0011429764563217
1	43200001	43300000	A	0.0075018964707851	B	-0.007688402198255	A	0.0133304586634039	A	0.0042431997135281	A	0.0126600600779056	A	0.0194879360496997	B	-0.0062684742733836
1	43300001	43400000	A	0.0110715981572866	B	-0.0147515190765261	A	0.0156504996120929	A	0.0041271960362792	A	0.0134286303073167	A	0.0055956118740141	A	0.001330580911599
1	43400001	43500000	A	0.0190966501832008	B	-0.0021221530623733	A	0.0203688237816095	A	0.0135036660358309	A	0.0187765322625637	A	0.0177809223532676	A	0.0054334225133061
1	43500001	43600000	A	0.0168116670101881	B	-0.0101984646171331	A	0.0167309045791625	A	0.0086384043097496	A	0.0141170294955372	A	0.0137453470379114	A	0.0022625150159001
1	43600001	43700000	A	0.010390761308372	B	-0.0232583507895469	A	0.0074162054806947	B	-0.0021284285467118	A	0.0022883110214024	A	0.0037492939736694	B	-0.0131324538961052
1	43700001	43800000	A	0.0145289255306124	B	-0.011843186803162	A	0.0125382766127586	A	0.0053037656471133	A	0.0129772657528519	A	0.0236361883580684	B	-0.0052854600362479
1	43800001	43900000	A	0.0145792020484805	B	-0.0003420897992327	A	0.0163623206317424	A	0.0069268546067178	A	0.0167901497334241	A	0.0313095115125179	B	-0.0036242506466805
1	43900001	44000000	A	0.0171956848353147	A	0.0099603757262229	A	0.0199414808303117	A	0.0146380113437771	A	0.0199069213122129	A	0.0333726517856121	A	0.0028711026534438
1	44000001	44100000	A	0.0147167956456542	A	0.0013942507794126	A	0.0153038036078214	A	0.0097403572872281	A	0.0172543991357088	A	0.0327794589102268	B	-0.0028853300027549
1	44100001	44200000	B	-0.0045978156849741	B	-0.0063418382778763	A	0.0024488065391778	A	0.0008819286595098	A	0.0072919693775475	A	0.0281692687422037	B	-0.0035772931296378
1	44200001	44300000	B	-0.0216902792453765	B	-0.0242980998009443	B	-0.018932631239295	B	-0.0217954646795988	B	-0.0236009266227483	B	-0.0030831275507807	B	-0.0294541846960783
1	44300001	44400000	B	-0.0279225129634141	B	-0.0304901953786611	B	-0.0250042211264371	B	-0.0287669245153665	B	-0.027686545625329	B	-0.012543230317533	B	-0.0331475548446178
1	44400001	44500000	B	-0.0278093386441469	B	-0.0305559914559125	B	-0.0232297629117965	B	-0.0290268175303936	B	-0.0286067854613065	B	-0.0108236279338598	B	-0.0331603214144706
1	44500001	44600000	B	-0.0250839553773403	B	-0.0297424122691154	B	-0.0187888946384191	B	-0.0203621983528137	B	-0.0150799201801419	B	-0.0041366005316376	B	-0.0260400902479887
1	44600001	44700000	B	-0.0258594322949647	B	-0.0290045104920864	B	-0.0165906678885221	B	-0.0173330772668123	B	-0.0146150421351194	B	-0.0045311553403735	B	-0.0257283970713615
1	44700001	44800000	B	-0.0230732001364231	B	-0.0216865688562393	B	-0.0169697236269712	B	-0.0186641905456781	B	-0.0195758789777755	B	-0.0128119951114058	B	-0.027138564735651
1	44800001	44900000	B	-0.0268192365765571	B	-0.0267125032842159	B	-0.0209109801799058	B	-0.0256472006440162	B	-0.025537647306919	B	-0.0213724337518215	B	-0.0324559621512889
1	44900001	45000000	B	-0.0282798036932945	B	-0.0290445815771818	B	-0.0253164507448673	B	-0.0283932518213987	B	-0.027509493753314	B	-0.0183285865932703	B	-0.03355448320508
1	45000001	45100000	B	-0.0275203920900821	B	-0.0275891460478305	B	-0.0250241551548242	B	-0.0279693026095628	B	-0.0285126585513353	B	-0.0208799391984939	B	-0.033758271485567
1	45100001	45200000	B	-0.0277672335505485	B	-0.0270336642861366	B	-0.0245280750095844	B	-0.0287795662879943	B	-0.0284302663058042	B	-0.0192427951842546	B	-0.0337149240076541
1	45200001	45300000	B	-0.0275983288884162	B	-0.0255809351801872	B	-0.0221131965517997	B	-0.0257014986127614	B	-0.027110593393445	B	-0.0104757994413375	B	-0.0332580730319023
1	45300001	45400000	B	-0.0252925287932157	B	-0.0132896024733781	B	-0.0126626985147595	B	-0.0158403161913156	B	-0.0233591441065073	B	-0.005795638076961	B	-0.0312933884561061
1	45400001	45500000	B	-0.0258742496371269	B	-0.0215084142982959	B	-0.015311405993998	B	-0.0192514285445213	B	-0.0219968035817146	B	-0.0091616744175553	B	-0.0317042768001556
1	45500001	45600000	B	-0.0272067058831453	B	-0.0278148092329502	B	-0.019803911447525	B	-0.0233158711344003	B	-0.0249671693891286	B	-0.0065111415460705	B	-0.0325878597795963
1	45600001	45700000	B	-0.0248958431184291	B	-0.0258163437247276	B	-0.018418526276946	B	-0.0249100476503372	B	-0.0271116234362125	B	-0.0125530324876308	B	-0.033052135258913
1	45700001	45800000	B	-0.0236581359058618	B	-0.0253020264208316	B	-0.0166264120489358	B	-0.0201531685888767	B	-0.0207349006086587	B	-0.0065109767019748	B	-0.0268073324114084
1	45800001	45900000	B	-0.0048986221663653	B	-0.0001504187239333	B	-0.0082236714661121	B	-0.0134743927046656	B	-0.0131728611886501	A	0.011054172180593	B	-0.0161035228520631
1	45900001	46000000	B	-0.00879343226552	B	-0.0063186851330101	B	-0.0113766090944409	B	-0.0174948759377002	B	-0.0197897497564554	B	-0.002840218367055	B	-0.0249344520270824
1	46000001	46100000	B	-0.0164563432335853	B	-0.0130853904411196	B	-0.0150513527914881	B	-0.0202040411531925	B	-0.0241822469979524	B	-0.0114674298092722	B	-0.0289315041154623
1	46100001	46200000	B	-0.0202818792313337	B	-0.0221346784383058	B	-0.0210776776075363	B	-0.0232631657272577	B	-0.0252844877541065	B	-0.0147815607488155	B	-0.0289855040609836
1	46200001	46300000	B	-0.0196660105139017	B	-0.0200170390307903	B	-0.019620344042778	B	-0.0265910904854536	B	-0.0258193127810955	B	-0.016063667833805	B	-0.0299124103039503
1	46300001	46400000	B	-0.0185620859265327	B	-0.0166266318410635	B	-0.0187581498175859	B	-0.02175859734416	B	-0.0256281439214944	B	-0.0170606300234794	B	-0.0295412316918373
1	46400001	46500000	B	-0.020130019634962	B	-0.0206982567906379	B	-0.0184600036591291	B	-0.0212038028985261	B	-0.0228943973779678	B	-0.0111172636970877	B	-0.0242732129991054
1	46500001	46600000	B	-0.0172894522547721	B	-0.0138178812339901	B	-0.0195490512996912	B	-0.0212191976606845	B	-0.0210587047040462	B	-0.0097251404076814	B	-0.0133882658556103
1	46600001	46700000	B	-0.0181442555040121	B	-0.0078256959095597	B	-0.0188738293945789	B	-0.0248449854552745	B	-0.0195368640124797	A	0.0028598217759281	B	-0.0130998389795422
1	46700001	46800000	B	-0.015481162816286	B	-0.0022179416846483	B	-0.0148211475461721	B	-0.0202814172953367	B	-0.0152732050046324	B	-0.0015137918526306	B	-0.0108888559043407
1	46800001	46900000	B	-0.0111055234447121	B	-6.13664e+10	B	-0.0106831137090921	B	-0.0113307265564799	B	-0.0032891056034713	A	0.0124166151508688	A	0.0007025126833468
1	46900001	47000000	B	-0.0151759460568428	A	0.0023856866173446	B	-0.0155233712866902	B	-0.0200907494872808	B	-0.0115164518356323	A	0.0037371288053691	B	-0.0013829133240506
1	47000001	47100000	B	-0.0223064739257097	A	0.0004336966376286	B	-0.0195700153708457	B	-0.0224386341869831	B	-0.0129541931673884	B	-0.0110218273475766	B	-0.0017259841552004
1	47100001	47200000	B	-0.0218430832028388	B	-0.0072317006997764	B	-0.0183043759316205	B	-0.0212506521493196	B	-0.0099447052925825	B	-0.0136350886896252	B	-0.0019983255770057
1	47200001	47300000	B	-0.0129269417375326	B	-0.0104375658556818	B	-0.0151388840749859	B	-0.0161104220896959	B	-0.0086471606045961	B	-0.016031939536333	B	-0.0003967527009081
1	47300001	47400000	B	-0.017621986567974	B	-0.0178845096379518	B	-0.0182339828461408	B	-0.0201486591249704	B	-0.0095510333776474	B	-0.020136697217822	A	0.001508007175289
1	47400001	47500000	B	-0.0209168326109647	B	-0.0219278298318386	B	-0.0206126030534505	B	-0.0226764176040887	B	-0.0133500788360834	B	-0.022495113313198	A	0.0013115903129801
1	47500001	47600000	B	-0.0222710110247135	B	-0.0232583098113536	B	-0.0233555864542722	B	-0.022262904793024	B	-0.0164280943572521	B	-0.0233351234346628	B	-0.0023608307819813
1	47600001	47700000	B	-0.0216680075973272	B	-0.0220538955181837	B	-0.0221243221312761	B	-0.0216037090867757	B	-0.0182956121861934	B	-0.0236699394881725	B	-0.0035927970893681
1	47700001	47800000	B	-0.0190144702792167	B	-0.0203553903847932	B	-0.0199564136564731	B	-0.0228562708944082	B	-0.0199138484895229	B	-0.0198634639382362	B	-0.0065217367373406
1	47800001	47900000	B	-0.0185931380838155	B	-0.0189696475863456	B	-0.0207521468400955	B	-0.0234685596078634	B	-0.0190941486507654	B	-0.0138069735839962	B	-0.0060322354547679
1	47900001	48000000	B	-0.0204682070761919	B	-0.021082455292344	B	-0.0190291404724121	B	-0.0233685579150915	B	-0.0200899317860603	B	-0.0181919820606708	B	-0.0073876590467989
1	48000001	48100000	B	-0.0219182446599006	B	-0.0235281642526388	B	-0.0202394630759954	B	-0.0233428180217742	B	-0.0233518779277801	B	-0.0236632600426673	B	-0.0115293227136135
1	48100001	48200000	B	-0.0236725881695747	B	-0.0262089204043149	B	-0.0223160311579704	B	-0.0263457801192998	B	-0.0233146324753761	B	-0.0237936619669199	B	-0.0132259102538228
1	48200001	48300000	B	-0.0229817163199186	B	-0.0246328357607126	B	-0.0219180807471275	B	-0.0244180355221033	B	-0.0236868578940629	B	-0.0224604457616806	B	-0.0142257697880268
1	48300001	48400000	B	-0.0223284363746643	B	-0.0254800375550985	B	-0.0218891687691211	B	-0.0239526536315679	B	-0.024579994380474	B	-0.0218988973647356	B	-0.0140918949618935
1	48400001	48500000	B	-0.0221718717366457	B	-0.0238400977104902	B	-0.0220719240605831	B	-0.0253462791442871	B	-0.0225486364215612	B	-0.0196300949901342	B	-0.0120690762996673
1	48500001	48600000	B	-0.0224925354123115	B	-0.0258214063942432	B	-0.0229027085006237	B	-0.0250071361660957	B	-0.0232994519174098	B	-0.0166723206639289	B	-0.0139246601611375
1	48600001	48700000	B	-0.0227316729724407	B	-0.0233031809329986	B	-0.0228803846985101	B	-0.0247169602662324	B	-0.023991560563445	B	-0.0113264583051204	B	-0.0172231458127498
1	48700001	48800000	B	-0.022160604596138	B	-0.0259814485907554	B	-0.0221242476254701	B	-0.0251417122781276	B	-0.0251402389258146	B	-0.0193237513303756	B	-0.0174644161015748
1	48800001	48900000	B	-0.0209102351218462	B	-0.0229506958276033	B	-0.0200501512736082	B	-0.0252949800342321	B	-0.0245377738028764	B	-0.0222115144133567	B	-0.0173411592841148
1	48900001	49000000	B	-0.0210189092904329	B	-0.0238060522824525	B	-0.0233606193214654	B	-0.0235484279692173	B	-0.0245863776654005	B	-0.0231602787971496	B	-0.0176548361778259
1	49000001	49100000	B	-0.023745123296976	B	-0.0245339442044496	B	-0.0222888551652431	B	-0.024315133690834	B	-0.0246636550873518	B	-0.0228266865015029	B	-0.0173745844513177
1	49100001	49200000	B	-0.0229631774127483	B	-0.0260092951357364	B	-0.0237501300871372	B	-0.0263148937374353	B	-0.0262695867568254	B	-0.0233107302337884	B	-0.0197569951415061
1	49200001	49300000	B	-0.0227412711828947	B	-0.0260403361171484	B	-0.0247856471687555	B	-0.0267981775104999	B	-0.0262453109025955	B	-0.0228871796280145	B	-0.0205116998404264
1	49300001	49400000	B	-0.0235060062259435	B	-0.0269679278135299	B	-0.0235746949911117	B	-0.0252086892724037	B	-0.0239283367991447	B	-0.0196567084640264	B	-0.0197407789528369
1	49400001	49500000	B	-0.023820050060749	B	-0.0254354085773229	B	-0.0238324366509914	B	-0.0270578190684318	B	-0.0241791624575853	B	-0.0198590811342	B	-0.0199827663600444
1	49500001	49600000	B	-0.0218950137495994	B	-0.0250472370535135	B	-0.0212630778551101	B	-0.0241422206163406	B	-0.0232094638049602	B	-0.0211187563836574	B	-0.0194167662411928
1	49600001	49700000	B	-0.0217425264418125	B	-0.025378331542015	B	-0.0226371455937623	B	-0.0245267804712057	B	-0.0235616043210029	B	-0.0229517314583063	B	-0.0204005278646945
1	49700001	49800000	B	-0.02270551584661	B	-0.0258664190769195	B	-0.0223535876721143	B	-0.0237820297479629	B	-0.0243167113512754	B	-0.0232612509280443	B	-0.0201273243874311
1	49800001	49900000	B	-0.0213613230735063	B	-0.024891473352909	B	-0.0216460935771465	B	-0.0235780160874128	B	-0.0236651953309774	B	-0.0206784550100564	B	-0.0192839223891496
1	49900001	50000000	B	-0.0199265591800212	B	-0.0252555292099714	B	-0.0217778254300355	B	-0.0241079553961753	B	-0.0237209573388099	B	-0.0202621668577194	B	-0.018560241907835
1	50000001	50100000	B	-0.0218697227537632	B	-0.024683641269803	B	-0.0224132295697927	B	-0.0222334265708923	B	-0.0221967566758394	B	-0.0210560914129018	B	-0.017588397487998
1	50100001	50200000	B	-0.0230941474437713	B	-0.0254295580089092	B	-0.022560192272067	B	-0.0235498361289501	B	-0.0240463726222515	B	-0.0214765593409538	B	-0.0182950105518102
1	50200001	50300000	B	-0.0232414063066244	B	-0.0265776701271533	B	-0.0231080539524555	B	-0.0248214416205883	B	-0.022839892655611	B	-0.0203617103397846	B	-0.017726793885231
1	50300001	50400000	B	-0.0213536992669105	B	-0.0249795392155647	B	-0.0208719000220298	B	-0.0240083634853363	B	-0.0226707197725772	B	-0.0211595855653285	B	-0.015706080943346
1	50400001	50500000	B	-0.0224899221211671	B	-0.0259851720184087	B	-0.0216609220951795	B	-0.0242613200098276	B	-0.0224308706820011	B	-0.0177948996424675	B	-0.0155024863779544
1	50500001	50600000	B	-0.0231339521706104	B	-0.0263389032334089	B	-0.0222590025514364	B	-0.0250264927744865	B	-0.0199201647192239	B	-0.0170098319649696	B	-0.0123558975756168
1	50600001	50700000	B	-0.0231999326497316	B	-0.0254034809768199	B	-0.0200122892856597	B	-0.0236201863735914	B	-0.014412417076528	B	-0.0047422461211681	B	-0.0058661890216171
1	50700001	50800000	B	-0.0193348638713359	B	-0.0221454743295907	B	-0.0179978031665086	B	-0.0228802189230918	B	-0.0171240083873271	B	-0.0173459947109222	B	-0.0083299558609724
1	50800001	50900000	B	-0.0155786722898483	B	-0.0179537460207939	B	-0.0137607641518116	B	-0.0196023639291524	B	-0.0124578950926661	B	-0.0157102886587381	B	-0.0047114272601902
1	50900001	51000000	B	-0.0161780547350645	B	-0.0169355664402246	B	-0.0105100842192769	B	-0.0124806789681315	B	-0.0043834052048623	B	-0.0116062052547931	A	0.00187244778499
1	51000001	51100000	B	-0.0249679423868656	B	-0.0240279268473386	B	-0.0097621157765388	B	-0.0165587104856967	B	-0.0065129394643008	B	-0.0179748907685279	A	0.0064323996193706
1	51100001	51200000	B	-0.0241846889257431	B	-0.021401472389698	B	-0.008711289614439	B	-0.012782565318048	B	-0.0031831876840442	B	-0.0155154848471283	A	0.0097837569192051
1	51200001	51300000	B	-0.02128123678267	B	-0.0133669041097164	B	-0.0079760570079088	B	-0.0124196130782365	B	-0.003535471856594	B	-0.0100099993869662	A	0.0083065954968333
1	51300001	51400000	B	-0.016422901302576	B	-0.011848296970129	B	-0.0093299970030784	B	-0.0124321784824132	B	-0.0059301787987351	B	-0.0064538847655057	A	0.0016552588203921
1	51400001	51500000	B	-0.0031449063681066	B	-0.0059101674705743	B	-0.0038666580803692	B	-0.0102984746918082	A	0.002188213635236	A	0.018471822142601	A	0.0055261556990444
1	51500001	51600000	A	0.0044279871508479	B	-0.0068779038265347	B	-0.0036008192691951	B	-0.0098339049145579	A	0.0041472087614238	A	0.0231861807405948	A	0.0056688920594751
1	51600001	51700000	B	-0.0026711269747465	A	0.001458348124288	A	0.0022261615376919	B	-0.0026160029228776	A	0.0131526766344904	A	0.0226675812155008	A	0.0098264245316386
1	51700001	51800000	A	0.0016162580577656	A	0.0096090650185942	A	0.0114240627735853	A	0.0074193733744323	A	0.0205299686640501	A	0.0290683638304471	A	0.0159886050969362
1	51800001	51900000	A	0.0030912705697119	A	0.0122299967333674	A	0.0152416052296757	A	0.0083668855950236	A	0.0194522459059953	A	0.0287400521337986	A	0.0174793768674135
1	51900001	52000000	A	0.0010888024698942	A	0.0049389982596039	A	0.0109151061624288	A	0.0042601767927408	A	0.0167186129838228	A	0.0273674819618463	A	0.0106929261237382
1	52000001	52100000	B	-0.0042264317162334	B	-0.0047799153253436	A	0.0085447048768401	B	-0.0043971221894025	A	0.0120817329734563	A	0.0277663189917802	A	0.004137048497796
1	52100001	52200000	A	0.0057852617464959	A	0.0110618583858013	A	0.0132645294070243	A	0.0081748133525252	A	0.0194831918925046	A	0.0323908030986785	A	0.0068496861495077
1	52200001	52300000	A	0.008796258829534	A	0.0123940762132406	A	0.0087861018255352	A	0.0031129913404583	A	0.0172674302011728	A	0.0287776198238134	A	0.0045041507109999
1	52300001	52400000	A	0.0022363986354321	A	0.0102866059169173	A	0.002121418248862	B	-0.0085371695458889	A	0.003374682739377	A	0.0158223547041416	A	0.0011269567767158
1	52400001	52500000	A	0.0029796052258461	A	0.0098132798448205	A	0.0038384397048503	B	-0.0075846835970878	A	0.0046488242223858	A	0.015801653265953	A	0.0009890520013868
1	52500001	52600000	A	0.002923731226474	A	0.0097422674298286	A	0.004423382692039	B	-0.0087452819570899	A	0.0047070221044123	A	0.0182079430669546	B	-0.000472667539725
1	52600001	52700000	B	-0.0020923821721225	A	0.0007060376810841	A	0.0021994682028889	B	-0.0044471248984336	A	0.0085864951834082	A	0.0219336226582527	A	0.0015726798446848
1	52700001	52800000	B	-0.0052403574809432	B	-0.000582146923989	A	0.0014096566010266	B	-0.0083794090896844	A	0.0116213159635663	A	0.023801838979125	A	0.0022833633702248
1	52800001	52900000	B	-0.0083418786525726	B	-0.0057358271442353	A	0.0014102802379056	B	-0.0068051279522478	A	0.0095502287149429	A	0.0268070939928293	A	0.0009902677265927
1	52900001	53000000	B	-0.0185248125344514	B	-0.0201391596347093	B	-0.005149807780981	B	-0.0146797923371195	A	2.13551e+10	A	0.0229069665074348	B	-0.0074411639943718
1	53000001	53100000	B	-0.0251336470246315	B	-0.0249478332698345	B	-0.0095616923645138	B	-0.0175476241856813	B	-0.0041365376673638	A	0.0106208799406886	B	-0.0131080588325858
1	53100001	53200000	B	-0.0263167656958103	B	-0.0263777431100606	B	-0.0111510744318366	B	-0.0218626037240028	B	-0.0069651464000344	A	0.0114218285307288	B	-0.0179267860949039
1	53200001	53300000	B	-0.0213002804666757	B	-0.0204490963369607	B	-0.0051766890101134	B	-0.0118287075310945	B	-0.0020474030170589	A	0.0163987334817647	B	-0.0116359954699873
1	53300001	53400000	B	-0.0185526143759489	B	-0.0132343005388975	B	-0.0037611715961247	B	-0.0103146871551871	A	0.0014077780069783	A	0.0147484466433525	B	-0.0102773699909448
1	53400001	53500000	B	-0.0201254468411207	B	-0.017521396279335	B	-0.0127780111506581	B	-0.0174724962562322	B	-0.0109849050641059	B	-0.0035339230671525	B	-0.0208136923611164
1	53500001	53600000	B	-0.0205084439367055	B	-0.0181406699120998	B	-0.0128280036151409	B	-0.0194536838680505	B	-0.0132896667346358	B	-0.0012512343237176	B	-0.0230049304664134
1	53600001	53700000	B	-0.0206669550389051	B	-0.0187819134443998	B	-0.0118756126612424	B	-0.0197949055582284	B	-0.0098278224468231	A	0.0025564949028193	B	-0.0218758787959814
1	53700001	53800000	B	-0.0069512710906565	B	-0.0038379300385713	B	-0.0003222734376322	B	-0.0085539408028125	A	0.0054042683914303	A	0.0214144103229045	B	-0.0133162522688508
1	53800001	53900000	B	-0.0011249614180997	B	-0.0047359727323055	A	0.0003091740945819	B	-0.0112176230177283	A	0.009744961746037	A	0.0272969119250774	B	-0.0118080340325832
1	53900001	54000000	A	0.0046330764889717	B	-0.0112069174647331	B	-0.0021918753627687	B	-0.0063656927086412	B	-0.000430972489994	A	0.0130909755825996	B	-0.0114356391131877
1	54000001	54100000	A	0.0119397947564721	B	-0.0113381743431091	B	-0.0021190454717725	B	-0.0107039976865053	B	-0.0075793918222188	A	0.0110006006434559	B	-0.0152855720371007
1	54100001	54200000	A	0.0080057708546519	B	-0.0125499106943607	B	-6.52216e+10	B	-0.0059354458935558	B	-0.0032532196491956	A	0.0125896101817488	B	-0.0109992884099483
1	54200001	54300000	A	0.0010316589614376	B	-0.0175649505108594	B	-0.0006715334020555	B	-0.0083735547959804	B	-0.0019112927839159	A	0.0167848113924264	B	-0.0159681402146816
1	54300001	54400000	B	-0.002457364462316	B	-0.0187983382493257	B	-0.0024120274465531	B	-0.0075652115046978	B	-0.0008301782072521	A	0.0171514023095369	B	-0.0145992077887058
1	54400001	54500000	B	-0.001768106361851	B	-0.0085939662531018	A	0.0069290841929614	B	-0.0002998327836394	A	0.018391016870737	A	0.0321273133158683	A	0.0061924303881824
1	54500001	54600000	B	-0.0026006975676864	B	-0.0089862439781427	A	0.0089069372043013	B	-0.0025216876529157	A	0.0233044140040874	A	0.0289693232625722	A	0.016277415677905
1	54600001	54700000	A	0.0059237689711153	B	-0.002163142664358	A	0.0095642711967229	B	-0.0009169820696115	A	0.0261975079774856	A	0.0233846679329872	A	0.0230198036879301
1	54700001	54800000	A	0.0134747559204697	A	0.0092599000781774	A	0.0117843551561236	A	0.002867275616154	A	0.0270804539322853	A	0.0230126157402992	A	0.0256697461009025
1	54800001	54900000	A	0.0193986352533102	A	0.0139088602736592	A	0.0191143453121185	A	0.0117639629170298	A	0.0276655182242393	A	0.0265516694635152	A	0.0252427477389574
1	54900001	55000000	A	0.0164206866174936	A	0.0139753594994544	A	0.0222868844866752	A	0.0157948359847068	A	0.0291989482939243	A	0.033995933830738	A	0.0217428915202617
1	55000001	55100000	A	0.0194335971027612	A	0.0197341293096542	A	0.0264526568353176	A	0.0236187223345041	A	0.0295802075415849	A	0.0359084047377109	A	0.0176651291549205
1	55100001	55200000	A	0.0087302634492516	A	0.0047700838185846	A	0.0177291743457317	A	0.0095276068896055	A	0.0291982777416706	A	0.0354420728981494	A	0.0142264943569898
1	55200001	55300000	B	-0.0095311421900987	B	-0.0163229070603847	A	0.0052900123409926	B	-0.0040100333280861	A	0.020895292982459	A	0.0293584205210208	B	-0.0009262500680051
1	55300001	55400000	B	-0.0154589600861072	B	-0.024662934243679	B	-0.0003317783994134	B	-0.0106921643018722	A	0.0124313291162252	A	0.0195098910480737	B	-0.0091963447630405
1	55400001	55500000	B	-0.0150312818586826	B	-0.0193936228752136	B	-0.0007385151693597	B	-0.0089802062138915	A	0.0158717706799507	A	0.0052158092148602	A	0.0073150689713656
1	55500001	55600000	B	-0.0201755445450544	B	-0.0223597586154937	B	-0.0031150544527918	B	-0.0132847968488931	A	0.0145068690180778	B	-0.0054190778173506	A	0.0117598650977015
1	55600001	55700000	B	-0.0167507510632276	B	-0.0157954879105091	B	-0.0027372490148991	B	-0.009032342582941	A	0.0192189905792474	B	-0.0104503482580184	A	0.0166001953184604
1	55700001	55800000	B	-0.0146191623061895	B	-0.0147024560719728	B	-0.0024670788552612	B	-0.0085216714069247	A	0.01556047052145	B	-0.0086850859224796	A	0.0085033541545271
1	55800001	55900000	B	-0.019632926210761	B	-0.0205398499965667	B	-0.0036425858270376	B	-0.0092626390978693	A	0.0123849911615252	B	-0.0066753178834915	B	-0.0008969276677817
1	55900001	56000000	B	-0.0206897221505641	B	-0.0219063572585582	B	-0.0086598759517073	B	-0.01279326248914	A	0.0046577393077313	B	-0.0098133897408843	B	-0.0105505315586924
1	56000001	56100000	B	-0.0267793741077184	B	-0.028132414445281	B	-0.0156334210187196	B	-0.0201115980744361	B	-0.0051106624305248	B	-0.0190147552639246	B	-0.0223502069711685
1	56100001	56200000	B	-0.0246676132082939	B	-0.0266711227595806	B	-0.0161088090389966	B	-0.0205238834023475	B	-0.0050375266000628	B	-0.0189758092164993	B	-0.022753357887268
1	56200001	56300000	B	-0.0258323848247528	B	-0.0284426026046276	B	-0.0142563171684741	B	-0.0220806021243333	B	-0.0041117127984762	B	-0.0193874947726726	B	-0.0221463330090045
1	56300001	56400000	B	-0.0246918350458145	B	-0.0296988673508167	B	-0.0141801359131932	B	-0.0196798015385866	B	-0.0004398597229737	B	-0.0185515731573104	B	-0.0210425667464733
1	56400001	56500000	B	-0.0268678274005651	B	-0.0306474976241588	B	-0.0181943085044622	B	-0.0238356236368417	A	0.0015611218987032	B	-0.0160895828157663	B	-0.0213323049247264
1	56500001	56600000	B	-0.0283726640045642	B	-0.0301912501454353	B	-0.0150297526270151	B	-0.0225198585540056	A	0.0068030962720513	B	-0.0166941974312067	B	-0.0193707514554262
1	56600001	56700000	B	-0.0286221429705619	B	-0.0312383864074945	B	-0.0144871175289154	B	-0.0218473859131336	A	0.0112189520150423	B	-0.0064308140426874	B	-0.0173883661627769
1	56700001	56800000	B	-0.0264050122350454	B	-0.0282650925219059	B	-0.0118564795702695	B	-0.0183039885014295	A	0.0131672145798802	B	-0.0027836228255182	B	-0.0168717484921216
1	56800001	56900000	B	-0.0268707890063524	B	-0.0268082506954669	B	-0.0059571214951574	B	-0.0110712386667728	A	0.0160633474588394	B	-0.0027887916658073	B	-0.0044299927540123
1	56900001	57000000	B	-0.0177414398640394	B	-0.0162724647670984	A	0.0030838579405099	B	-0.0011859482619911	A	0.0173242390155792	A	0.010359238833189	A	0.0005209817318245
1	57000001	57100000	B	-0.0202537830919027	B	-0.0228769928216934	B	-0.0039989706128835	B	-0.0101119233295321	A	0.0119470069184899	A	0.0006624042871408	B	-0.0078178765252232
1	57100001	57200000	B	-0.0213263854384422	B	-0.0234584715217351	B	-0.0054040364921092	B	-0.0118315033614635	A	0.0069243675097823	B	-0.0071965497918426	B	-0.0100792245939373
1	57200001	57300000	B	-0.015158356167376	B	-0.0206712316721677	B	-0.001821196405217	B	-0.0087391510605812	A	0.0111156962811946	A	0.0029293075203895	B	-0.0052715055644512
1	57300001	57400000	B	-0.0076032071374356	B	-0.0070756189525127	A	0.0094571532681584	A	0.0013220615219324	A	0.0216156914830207	A	0.0243211947381496	A	0.0044907159171998
1	57400001	57500000	A	0.0127497930079698	A	0.0127168726176023	A	0.0158095005899667	A	0.0070811044424772	A	0.0254476945847272	A	0.0220085810869932	A	0.0202152729034423
1	57500001	57600000	A	0.0151381865143775	A	0.0102892993018031	A	0.011318739503622	B	-0.0004326962807681	A	0.0229774415493011	A	0.0107828713953495	A	0.0229987911880016
1	57600001	57700000	A	0.0152343027293682	A	0.0078767277300357	A	0.0112325940281152	A	0.0019973872695118	A	0.0230661872774362	A	0.0096793863922357	A	0.0245630759745836
1	57700001	57800000	A	0.0155971618369221	A	0.0063238716684281	A	0.0137092098593711	A	0.0051150056533515	A	0.0264479424804449	A	0.0119084557518363	A	0.0250500980764627
1	57800001	57900000	A	0.01525470148772	A	0.0070018284022808	A	0.0172229669988155	A	0.0079246871173381	A	0.0289504863321781	A	0.0146078867837786	A	0.0264908168464899
1	57900001	58000000	A	0.0175654906779527	A	0.0124067487195134	A	0.0188235975801944	A	0.0139480354264378	A	0.0284677390009164	A	0.0259284861385822	A	0.0223801750689744
1	58000001	58100000	A	0.0238966234028339	A	0.015225077047944	A	0.0224400348961353	A	0.0152054978534579	A	0.0268077012151479	A	0.029416624456644	A	0.0147579358890652
1	58100001	58200000	A	0.0239376947283744	A	0.0181129910051822	A	0.0232944246381521	A	0.0148733211681246	A	0.0229837223887443	A	0.0251383949071168	A	0.008907570503652
1	58200001	58300000	A	0.0258171223104	A	0.0196542479097843	A	0.0242972113192081	A	0.0180702712386846	A	0.0237237866967916	A	0.028254434466362	A	0.0083640497177839
1	58300001	58400000	A	0.0268088411539793	A	0.0242710784077644	A	0.0275047309696674	A	0.0214462801814079	A	0.0285609923303127	A	0.0312727987766265	A	0.0127733405679464
1	58400001	58500000	A	0.03073450922966	A	0.028294026851654	A	0.031446173787117	A	0.0287761017680168	A	0.0278496984392404	A	0.034568153321743	A	0.0150827271863818
1	58500001	58600000	A	0.0307072289288043	A	0.0296518225222826	A	0.0305669642984867	A	0.0246211849153041	A	0.0301575381308794	A	0.0321942493319511	A	0.0131384376436471
1	58600001	58700000	A	0.0253532137721776	A	0.0262861847877502	A	0.0245684944093227	A	0.0175616480410099	A	0.0249232929199934	A	0.0225923154503107	A	0.0021729627624154
1	58700001	58800000	A	0.0308628268539905	A	0.0297997370362281	A	0.0295273941010236	A	0.026607846841216	A	0.0292442291975021	A	0.0266483835875988	A	0.0057187033817172
1	58800001	58900000	A	0.0290083140134811	A	0.0286856349557638	A	0.0263869781047105	A	0.0192575361579656	A	0.0241392366588115	A	0.0175511166453361	B	-0.0029502129182219
1	58900001	59000000	A	0.0316868312656879	A	0.0300508774816989	A	0.028862539678812	A	0.023330096155405	A	0.0295584183186292	A	0.0313012823462486	A	0.010835375636816
1	59000001	59100000	A	0.0316050127148628	A	0.0308963656425476	A	0.030975267291069	A	0.0244705434888601	A	0.0284351948648691	A	0.029907064512372	A	0.0070550115779042
1	59100001	59200000	A	0.0333691202104091	A	0.0328386835753917	A	0.031886413693428	A	0.0293231699615716	A	0.0320500433444976	A	0.0336890406906604	A	0.0183871202170848
1	59200001	59300000	A	0.033258881419897	A	0.0335803888738155	A	0.0323457457125186	A	0.0288873557001352	A	0.033423077315092	A	0.0344979912042617	A	0.0260467212647199
1	59300001	59400000	A	0.0339456833899021	A	0.0323757827281951	A	0.0328008159995079	A	0.030193468555808	A	0.0325364992022514	A	0.0337832830846309	A	0.0296495836228132
1	59400001	59500000	A	0.0348918139934539	A	0.0333845131099224	A	0.033210139721632	A	0.032301764935255	A	0.0326911956071853	A	0.0345430299639701	A	0.0299401469528675
1	59500001	59600000	A	0.0350375734269619	A	0.0333373397588729	A	0.0341343134641647	A	0.0308213755488395	A	0.0332482978701591	A	0.0348104089498519	A	0.0298282783478498
1	59600001	59700000	A	0.0351228229701519	A	0.0344546735286712	A	0.034695878624916	A	0.0330411419272422	A	0.0330943614244461	A	0.035523198544979	A	0.0272741876542568
1	59700001	59800000	A	0.0337636917829513	A	0.0342306867241859	A	0.0350973531603813	A	0.0327727384865284	A	0.033014565706253	A	0.0355826392769813	A	0.028573153540492
1	59800001	59900000	A	0.0319340899586677	A	0.0327750220894813	A	0.0335077568888664	A	0.0314254127442836	A	0.0334429964423179	A	0.0347592644393444	A	0.0299068875610828
1	59900001	60000000	A	0.0322597436606884	A	0.03103893622756	A	0.0320305041968822	A	0.0307231396436691	A	0.0330297015607357	A	0.0345205888152122	A	0.030004845932126
1	60000001	60100000	A	0.0283950977027416	A	0.0296551007777452	A	0.0322517342865467	A	0.0264267902821302	A	0.0320111326873302	A	0.0344690792262554	A	0.029020071029663
1	60100001	60200000	A	0.0299152620136737	A	0.0298881419003009	A	0.0327174887061119	A	0.0290991477668285	A	0.0320768281817436	A	0.034997746348381	A	0.0288399178534746
1	60200001	60300000	A	0.0250521395355463	A	0.0269917324185371	A	0.0310439802706241	A	0.0254120267927646	A	0.0317423678934574	A	0.0341228321194648	A	0.0265301614999771
1	60300001	60400000	A	0.0240637175738811	A	0.0286167338490486	A	0.0304312761873006	A	0.0257835611701011	A	0.0325730927288532	A	0.0338724665343761	A	0.029865313321352
1	60400001	60500000	A	0.0215802490711212	A	0.0255633257329463	A	0.0293194446712732	A	0.023619707673788	A	0.0326440222561359	A	0.0334957093000412	A	0.0306383743882179
1	60500001	60600000	A	0.0189487487077713	A	0.0247235503047704	A	0.0277876816689968	A	0.0209424439817667	A	0.0308457389473915	A	0.028689119964838	A	0.0312708057463169
1	60600001	60700000	A	0.0163298901170492	A	0.0227219704538583	A	0.025710891932249	A	0.0136074488982558	A	0.0273747649043798	A	0.0137486867606639	A	0.0306204594671726
1	60700001	60800000	A	0.0183790791779756	A	0.0207855775952339	A	0.0237524434924125	A	0.013153557665646	A	0.0265772677958011	A	0.0174698010087013	A	0.0295438133180141
1	60800001	60900000	A	0.0187298320233821	A	0.0240036360919475	A	0.0277492720633745	A	0.0180789660662412	A	0.0307604111731052	A	0.0283604264259338	A	0.0314768031239509
1	60900001	61000000	A	0.0160584598779678	A	0.0213735625147819	A	0.0275238323956727	A	0.0195415914058685	A	0.0309902913868427	A	0.0102840820327401	A	0.0317255333065986
1	61000001	61100000	A	0.0103841908276081	A	0.014158820733428	A	0.0258923377841711	A	0.0203470028936862	A	0.0270817466080188	B	-0.0040201307274401	A	0.0290949512273073
1	61100001	61200000	A	0.0100530143827199	A	0.0111907487735152	A	0.024735651910305	A	0.0194852482527494	A	0.0252180304378271	B	-0.0008296247106045	A	0.027085717767477
1	61200001	61300000	A	0.0067342012189328	A	0.0077079939655959	A	0.0235791448503732	A	0.0155438650399446	A	0.0250691343098878	B	-0.0063411383889615	A	0.0290238484740257
1	61300001	61400000	A	0.0089641781523823	A	0.0092240115627646	A	0.0234654322266578	A	0.0148657895624637	A	0.0241680778563022	B	-0.0013774457620456	A	0.0273602399975061
1	61400001	61500000	A	0.0062491572462022	A	0.0097049083560705	A	0.0224092993885278	A	0.0100709302350878	A	0.023844925686717	A	0.0029634705279022	A	0.0304438713937997
1	61500001	61600000	A	0.0041622431017458	A	0.004649678710848	A	0.0204628128558397	A	0.0086650624871253	A	0.0240884479135274	A	0.004470553714782	A	0.0302540101110935
1	61600001	61700000	A	0.0083916932344436	A	0.0065875365398824	A	0.0225027259439229	A	0.013052468188107	A	0.0263487659394741	B	-0.0018789825262501	A	0.030506681650877
1	61700001	61800000	A	0.0022769423667341	A	0.0051077478565275	A	0.0200723465532064	A	0.0119423978030681	A	0.0252852216362953	B	-0.0087305856868624	A	0.029970146715641
1	61800001	61900000	A	0.0030416713561862	A	0.0047020753845572	A	0.0203628148883581	A	0.0085251647979021	A	0.0259287133812904	B	-0.0105291716754436	A	0.0309489462524652
1	61900001	62000000	A	0.0046187047846615	A	0.0089299716055393	A	0.0232229400426149	A	0.0144455712288618	A	0.0260172113776206	B	-0.0060660340823233	A	0.0300904177129268
1	62000001	62100000	A	0.0036780908703804	A	0.0118718817830085	A	0.0217978823930025	A	0.0135622471570968	A	0.0255193784832954	B	-0.0054739951156079	A	0.0309566780924797
1	62100001	62200000	A	0.0058633750304579	A	0.0151803325861692	A	0.0247940849512815	A	0.0123923951759934	A	0.0261866990476846	A	0.0030701037030667	A	0.0305636264383792
1	62200001	62300000	A	0.0032157080713659	A	0.0130725307390093	A	0.0220372322946786	A	0.0138648655265569	A	0.0253244135528802	A	0.0024331908207386	A	0.0306228026747703
1	62300001	62400000	A	0.0084162270650267	A	0.0220664646476507	A	0.0233022142201662	A	0.0138164451345801	A	0.0254451092332601	A	0.006016528699547	A	0.031081473454833
1	62400001	62500000	A	0.0057528209872543	A	0.0207396522164344	A	0.0260195322334766	A	0.015997452661395	A	0.0245760958641767	A	0.0014530805638059	A	0.0304258484393358
1	62500001	62600000	A	0.0072119701653718	A	0.0224054269492626	A	0.0249497760087251	A	0.0181436147540807	A	0.0245154872536659	A	0.0029204110614955	A	0.0305006578564643
1	62600001	62700000	A	0.009368578903377	A	0.0193051137030124	A	0.0252058953046798	A	0.0186009779572486	A	0.0248206816613674	A	0.0135701699182391	A	0.0293304193764925
1	62700001	62800000	A	0.0241328179836273	A	0.0204785261303186	A	0.0306870210915803	A	0.0260069575160741	A	0.0273272357881069	A	0.0318752862513065	A	0.027844438329339
1	62800001	62900000	A	0.0193950850516557	A	0.0204467866569757	A	0.0314579457044601	A	0.0261653885245323	A	0.0275865830481052	A	0.022284097969532	A	0.0303972866386175
1	62900001	63000000	A	0.0204180758446455	A	0.0194846466183662	A	0.0302632227540016	A	0.025010984390974	A	0.0249653905630111	A	0.0243080649524927	A	0.0267258938401937
1	63000001	63100000	A	0.0280049890279769	A	0.0264801159501075	A	0.034931905567646	A	0.0312519036233425	A	0.0318550392985343	A	0.0351977534592151	A	0.0296385437250137
1	63100001	63200000	A	0.0312564074993133	A	0.0299590397626161	A	0.0364389717578887	A	0.0359804667532444	A	0.0340907499194145	A	0.0360451899468898	A	0.0310525521636009
1	63200001	63300000	A	0.0256283283233642	A	0.0188086796551942	A	0.032919093966484	A	0.0277717690914869	A	0.0340860188007354	A	0.0359533131122589	A	0.032712236046791
1	63300001	63400000	A	0.0138769624754786	A	0.0078123528510332	A	0.0294399131089448	A	0.0209613628685474	A	0.0326225906610488	A	0.0326358973979949	A	0.0320554487407207
1	63400001	63500000	A	0.0148683134466409	A	0.0030975611880421	A	0.0303729772567749	A	0.0240196865051984	A	0.0325281023979187	A	0.0355042293667793	A	0.0322060920298099
1	63500001	63600000	A	0.0129389278590679	A	0.0052728047594428	A	0.0277609042823314	A	0.0172945503145456	A	0.0325917564332485	A	0.0338720716536045	A	0.0324546508491039
1	63600001	63700000	A	0.0148046948015689	A	0.0096168629825115	A	0.0239448193460702	A	0.017547333613038	A	0.0287682525813579	A	0.0251987148076295	A	0.0284486580640077
1	63700001	63800000	A	0.0216121692210435	A	0.0219376776367425	A	0.0252083875238895	A	0.0176107678562402	A	0.0311046056449413	A	0.0260115265846252	A	0.0296132955700159
1	63800001	63900000	A	0.0214117709547281	A	0.0239190608263015	A	0.0199037175625562	A	0.0095824189484119	A	0.0296126082539558	A	0.0180178079754114	A	0.0306646768003702
1	63900001	64000000	A	0.0238702408969402	A	0.0279406066983938	A	0.0250463355332613	A	0.0170538611710071	A	0.0314947180449962	A	0.0216822903603315	A	0.0315054431557655
1	64000001	64100000	A	0.0254515949636697	A	0.0279717165976762	A	0.0273484215140342	A	0.0218163635581731	A	0.0321468003094196	A	0.0269055049866437	A	0.0320266969501972
1	64100001	64200000	A	0.020311702042818	A	0.025136325508356	A	0.0254385266453027	A	0.021103074774146	A	0.0317901484668254	A	0.025170087814331	A	0.0319246686995029
1	64200001	64300000	A	0.0205483809113502	A	0.0259588714689016	A	0.026092754676938	A	0.0161415021866559	A	0.0311490017920732	A	0.0252645052969455	A	0.0317991860210895
1	64300001	64400000	A	0.0186179298907518	A	0.0229519251734018	A	0.0239759422838687	A	0.0163676757365465	A	0.0306650623679161	A	0.0231145620346069	A	0.0314563065767288
1	64400001	64500000	A	0.0192334149032831	A	0.0195909515023231	A	0.0229271929711103	A	0.016039652749896	A	0.0292450599372386	A	0.021344032138586	A	0.0293637197464704
1	64500001	64600000	A	0.0271177627146244	A	0.0246717855334281	A	0.0299065541476011	A	0.0272248312830925	A	0.0330626219511032	A	0.0337551534175872	A	0.0311774164438247
1	64600001	64700000	A	0.025350522249937	A	0.0242418181151151	A	0.0299251787364482	A	0.0245570223778486	A	0.032789122313261	A	0.0352504812180995	A	0.0303581785410642
1	64700001	64800000	A	0.0246054399758577	A	0.0241958256810903	A	0.0276195779442787	A	0.0236868541687726	A	0.0325784124433994	A	0.0346259661018848	A	0.0309242140501737
1	64800001	64900000	A	0.0251175612211227	A	0.0233587715774774	A	0.0272107422351837	A	0.0229027662426233	A	0.0320102609694004	A	0.0290436949580907	A	0.0307367239147424
1	64900001	65000000	A	0.0248918291181325	A	0.0228484105318784	A	0.0258718207478523	A	0.0203286558389663	A	0.0320218317210674	A	0.0314223878085613	A	0.0302048474550247
1	65000001	65100000	A	0.0209963954985141	A	0.0232960581779479	A	0.0227972827851772	A	0.0163687989115715	A	0.0296772699803113	A	0.0336361117660999	A	0.0271041952073574
1	65100001	65200000	A	0.0143082020804286	A	0.0161352418363094	A	0.0180322863161563	A	0.0146406190469861	A	0.0293478965759277	A	0.0329341068863868	A	0.0258765015751123
1	65200001	65300000	B	-0.0116795320063829	B	-0.0089955255389213	A	0.0013909710105508	B	-0.002762887859717	A	0.0171032976359128	A	0.0243277661502361	A	0.0165260769426822
1	65300001	65400000	B	-0.0291655529290437	B	-0.0296253729611635	B	-0.0196793340146541	B	-0.023769786581397	B	-0.0071252747438848	B	-0.0134569052606821	A	0.0001709386851871
1	65400001	65500000	B	-0.0309695191681385	B	-0.0309642702341079	B	-0.0254249703139066	B	-0.0302836541086435	B	-0.019968494772911	B	-0.0214115399867296	B	-0.0101561062037944
1	65500001	65600000	B	-0.0305960774421691	B	-0.0315903574228286	B	-0.026305504143238	B	-0.0297833438962698	B	-0.0185121316462755	B	-0.0219819378107786	B	-0.0092703970149159
1	65600001	65700000	B	-0.030589522793889	B	-0.0317725352942943	B	-0.0265979431569576	B	-0.0288615971803665	B	-0.0187541861087083	B	-0.0193850584328174	B	-0.0099502298980951
1	65700001	65800000	B	-0.0289298258721828	B	-0.0297672897577285	B	-0.0256364773958921	B	-0.0269881002604961	B	-0.0199759230017662	B	-0.019234575331211	B	-0.011684188619256
1	65800001	65900000	B	-0.030045436695218	B	-0.0304153598845005	B	-0.0252776835113763	B	-0.0268258061259984	B	-0.0193406995385885	B	-0.0228364989161491	B	-0.0106503022834658
1	65900001	66000000	B	-0.0305421892553567	B	-0.0310131032019853	B	-0.0231435168534517	B	-0.0265212208032608	B	-0.0172338653355836	B	-0.0253953002393245	B	-0.0066433837637305
1	66000001	66100000	B	-0.0211228691041469	B	-0.0214325431734323	B	-0.0144805824384093	B	-0.0181925594806671	B	-0.0091638080775737	B	-0.0194925796240568	A	0.0007273547234944
1	66100001	66200000	B	-0.0194934234023094	B	-0.0026107507292181	B	-0.0116315362975001	B	-0.019079165533185	A	0.0157729759812355	B	-0.0038520821835845	A	0.0212253723293542
1	66200001	66300000	B	-0.0204506833106279	A	0.0045607676729559	B	-0.0117387631908059	B	-0.0174251720309257	A	0.0179161038249731	B	-0.0106502883136272	A	0.0251133646816015
1	66300001	66400000	B	-0.0247902292758226	B	-0.0011690616374835	B	-0.0141135081648826	B	-0.0212026461958885	A	0.0202123913913965	B	-0.0128019899129867	A	0.024932088330388
1	66400001	66500000	B	-0.0236334614455699	B	-0.0153105501085519	B	-0.0172770600765943	B	-0.0221387073397636	A	0.014773853123188	B	-0.010444363579154	A	0.0204200260341167
1	66500001	66600000	B	-0.0236502476036548	B	-0.0179546363651752	B	-0.0200487226247787	B	-0.024183377623558	A	0.0070376037620007	B	-0.0142726078629493	A	0.0131146218627691
1	66600001	66700000	B	-0.0154015906155109	B	-0.0139001673087477	B	-0.0133058680221438	B	-0.0173368882387876	A	0.0121141569688916	A	0.0006528890226036	A	0.016200628131628
1	66700001	66800000	A	0.0009388346807099	A	0.0049836630932986	A	0.0021792899351567	B	-0.0037297422531992	A	0.0211779233068227	A	0.0238724239170551	A	0.0214364994317293
1	66800001	66900000	A	0.0027588184457272	A	0.0053141387179493	A	0.0020048292353749	B	-0.0053640305995941	A	0.0172910075634717	A	0.0166666079312562	A	0.0171849876642227
1	66900001	67000000	B	-0.0006761151016689	B	-0.0008770166314207	B	-0.0088658649474382	B	-0.017924603074789	A	0.0079721640795469	A	0.0102464882656931	A	0.0121413161978125
1	67000001	67100000	B	-0.0013814957346767	B	-0.0155662577599287	B	-0.0075342454947531	B	-0.0120552387088537	A	0.0066626365296542	B	-0.0039097224362194	A	0.0135233746841549
1	67100001	67200000	B	-0.0114229563623666	B	-0.0244635604321956	B	-0.0126095796003937	B	-0.0172214601188898	B	-0.0018256698967888	B	-0.0187136456370353	A	0.009527395479381
1	67200001	67300000	B	-0.0234887022525072	B	-0.0295469053089618	B	-0.0192626845091581	B	-0.0247073806822299	B	-0.0076897367835044	B	-0.0154231805354356	A	0.006784277036786
1	67300001	67400000	B	-0.026769183576107	B	-0.0327626727521419	B	-0.0210727714002132	B	-0.0262331366539001	B	-0.0088382931426167	B	-0.0223204940557479	A	0.0087197329849004
1	67400001	67500000	B	-0.0250756349414587	B	-0.0295099020004272	B	-0.0206246264278888	B	-0.0258158352226018	B	-0.0058474894613027	B	-0.0275865979492664	A	0.0106242047622799
1	67500001	67600000	B	-0.022274250164628	B	-0.0287212375551462	B	-0.02147769741714	B	-0.0234497915953397	B	-0.007727519609034	B	-0.0276592392474412	A	0.0090284664183855
1	67600001	67700000	B	-0.0186803378164768	B	-0.0276288222521543	B	-0.0197658706456422	B	-0.0242620464414358	B	-0.0045107956975698	B	-0.0254436265677213	A	0.0095105580985546
1	67700001	67800000	B	-0.0226362347602844	B	-0.0289468895643949	B	-0.0205170437693595	B	-0.0263630747795104	B	-0.0042690145783126	B	-0.0271929986774921	A	0.0134117063134908
1	67800001	67900000	B	-0.022306865081191	B	-0.0303527750074863	B	-0.0227849055081605	B	-0.0265929996967315	B	-0.0047086407430469	B	-0.0242967065423727	A	0.0125219747424125
1	67900001	68000000	B	-0.0225870944559574	B	-0.0302091371268033	B	-0.0225877054035663	B	-0.0255314372479915	B	-0.0007204611320048	B	-0.021170375868678	A	0.0142752444371581
1	68000001	68100000	B	-0.0192556958645582	B	-0.028859993442893	B	-0.0201985724270343	B	-0.0231453515589237	A	0.009465055540204	B	-0.0284463446587324	A	0.0186430756002664
1	68100001	68200000	B	-0.0126296589151024	B	-0.0243636555969715	B	-0.0160954371094703	B	-0.0202611610293388	A	0.0124335289001464	B	-0.0260405205190181	A	0.0203123968094587
1	68200001	68300000	B	-0.012398718856275	B	-0.0249224249273538	B	-0.0180956255644559	B	-0.0212357658892869	A	0.0112272882834076	B	-0.0255827344954013	A	0.019757404923439
1	68300001	68400000	B	-0.0120556224137544	B	-0.0272692404687404	B	-0.0193466115742921	B	-0.0236133448779582	A	0.0095929261296987	B	-0.0252566412091255	A	0.0183648020029068
1	68400001	68500000	B	-0.0097744259983301	B	-0.0265946667641401	B	-0.018251521512866	B	-0.0249261874705553	A	0.0080158403143286	B	-0.0229715947061777	A	0.0174083411693573
1	68500001	68600000	B	-0.0075310380198061	B	-0.0250342115759849	B	-0.0169390328228473	B	-0.018199797719717	A	0.0088087320327758	B	-0.0247786957770586	A	0.019276425242424
1	68600001	68700000	B	-0.0052643571980297	B	-0.0263239294290542	B	-0.0157036054879426	B	-0.0204077009111642	A	0.0098581779748201	B	-0.0256253611296415	A	0.020076310262084
1	68700001	68800000	A	0.0004520046059042	B	-0.0279312338680028	B	-0.0145872626453638	B	-0.0185813456773757	A	0.0117384437471628	B	-0.0236534345895051	A	0.0212357304990291
1	68800001	68900000	A	0.0030372240580618	B	-0.0273503456264734	B	-0.0152656072750687	B	-0.0202409289777278	A	0.0147008998319506	B	-0.0270253233611583	A	0.0212713964283466
1	68900001	69000000	A	0.0035756942816078	B	-0.0261091291904449	B	-0.0165978204458951	B	-0.0189498588442802	A	0.0143170319497585	B	-0.0278134737163782	A	0.020088167861104
1	69000001	69100000	A	0.0065927351824939	B	-0.0242501478642225	B	-0.0143457055091857	B	-0.0197883266955614	A	0.0151085266843438	B	-0.0232050064951181	A	0.0168624557554721
1	69100001	69200000	B	-0.0074999784119427	B	-0.0198331624269485	B	-0.010855721309781	B	-0.014901990070939	A	0.0047099255025386	B	-0.0177352260798215	A	0.0084796054288744
1	69200001	69300000	B	-0.0192088577896356	B	-0.0245841555297374	B	-0.0127086602151393	B	-0.0156391784548759	A	0.0023147326428443	B	-0.0221147052943706	A	0.0089353211224079
1	69300001	69400000	B	-0.0238495431840419	B	-0.0288796070963144	B	-0.0149859422817826	B	-0.0209436248987913	B	-9.83977e+09	B	-0.0216895062476396	A	0.0101584447547793
1	69400001	69500000	B	-0.0244256407022476	B	-0.0289647914469242	B	-0.0139559656381607	B	-0.0215744208544492	A	0.0041773202829062	B	-0.0218299943953752	A	0.012955592945218
1	69500001	69600000	B	-0.0239237546920776	B	-0.0292363483458757	B	-0.0141089092940092	B	-0.0190124884247779	A	0.0070508671924471	B	-0.0251052994281053	A	0.0148383369669318
1	69600001	69700000	B	-0.0207146517932415	B	-0.0258765872567892	B	-0.0113853076472878	B	-0.0148330284282565	A	0.0089494502171874	B	-0.0200216155499219	A	0.0161346569657325
1	69700001	69800000	B	-0.0214112978428602	B	-0.0261030234396457	B	-0.0108103239908814	B	-0.0139531278982758	A	0.0064300638623535	B	-0.0166711546480655	A	0.010782266035676
1	69800001	69900000	B	-0.025278178974986	B	-0.0293133612722158	B	-0.0158828888088464	B	-0.0212595704942941	B	-0.0060597546398639	B	-0.0140963001176714	A	0.0067032701335847
1	69900001	70000000	B	-0.0280357636511325	B	-0.0320676043629646	B	-0.0237021781504154	B	-0.0267133004963397	B	-0.0148007795214653	B	-0.0227521415799856	A	0.0032118761446326
1	70000001	70100000	B	-0.0284893792122602	B	-0.031508445739746	B	-0.0231702700257301	B	-0.024659439921379	B	-0.0095865819603204	B	-0.0261581558734178	A	0.0061930790543556
1	70100001	70200000	B	-0.02719197422266	B	-0.0281999260187149	B	-0.021277267485857	B	-0.021764988079667	B	-0.0113749578595161	B	-0.0277527384459972	A	0.0075450064614415
1	70200001	70300000	B	-0.0245959069579839	B	-0.0283743720501661	B	-0.0195843633264303	B	-0.0216572619974613	B	-0.0062759136781096	B	-0.022992031648755	A	0.0112920580431818
1	70300001	70400000	B	-0.0289166420698165	B	-0.0214719008654356	B	-0.0228410419076681	B	-0.0268522109836339	B	-0.0088258879259228	B	-0.0255077648907899	A	0.0131032122299075
1	70400001	70500000	B	-0.02961833961308	B	-0.0258471835404634	B	-0.0232757478952407	B	-0.0273208580911159	B	-0.0098984595388174	B	-0.0276188664138317	A	0.0138414846733212
1	70500001	70600000	B	-0.0300379637628793	B	-0.0263032335788011	B	-0.0233819000422954	B	-0.0294434279203414	B	-0.0108183491975069	B	-0.0272951740771532	A	0.0117376009002327
1	70600001	70700000	B	-0.0292841847985982	B	-0.0239413604140281	B	-0.0231744982302188	B	-0.0275969635695219	B	-0.0106902439147233	B	-0.0260120686143636	A	0.0104406364262104
1	70700001	70800000	B	-0.0274729188531637	B	-0.0267091002315282	B	-0.0212936475872993	B	-0.0268861837685108	B	-0.0126044461503624	B	-0.0232383292168378	A	0.0136785758659243
1	70800001	70900000	B	-0.0266255997121334	B	-0.0232988335192203	B	-0.0192524585872888	B	-0.0236507821828126	B	-0.0086565380915999	B	-0.0177564658224582	A	0.0168119110167026
1	70900001	71000000	B	-0.0263252481818199	B	-0.0245801918208599	B	-0.0189005490392446	B	-0.0240610931068658	B	-0.0068574240431189	B	-0.0144195724278688	A	0.017850287258625
1	71000001	71100000	B	-0.0221915021538734	B	-0.0207074526697397	B	-0.0102181360125541	B	-0.0147612262517213	A	0.0027112853713333	A	0.0153775168582797	A	0.0182725843042135
1	71100001	71200000	B	-0.0227256752550601	B	-0.0218792390078306	B	-0.0138199180364608	B	-0.0218820068985223	B	-0.000273167330306	B	-0.0031889313831925	A	0.0153643991798162
1	71200001	71300000	B	-0.0163475275039672	B	-0.0186794474720954	B	-0.0139553295448422	B	-0.021121684461832	B	-0.0026686061173677	B	-0.0070169223472476	A	0.0154336811974644
1	71300001	71400000	B	-0.0117952516302466	B	-0.0178692322224378	B	-0.0114561105147004	B	-0.01909383200109	B	-0.0008698235033079	B	-0.0128368567675352	A	0.0174321439117193
1	71400001	71500000	B	-0.0145879201591014	B	-0.0174530446529388	B	-0.0103902127593755	B	-0.0171870477497577	B	-0.0008752035209909	B	-0.007677118293941	A	0.0142042217776179
1	71500001	71600000	B	-0.0092224571853876	B	-0.0095235109329223	A	0.0055376002565026	A	0.000637287448626	A	0.0090944739058613	A	0.0261714700609445	A	0.0158016141504049
1	71600001	71700000	B	-0.0134090082719922	B	-0.0077969734556972	A	0.0145657546818256	A	0.0092324651777744	A	0.0162065252661705	A	0.0305536556988954	A	0.0187027603387832
1	71700001	71800000	B	-0.0155133176594972	B	-0.0120732430368661	A	0.0095594814047217	A	0.0013225103029981	A	0.007207756396383	A	0.0138545045629143	A	0.0184729155153036
1	71800001	71900000	B	-0.0173542536795139	B	-0.0059939487837255	A	0.010372782126069	A	0.0012534374836832	A	0.0061207734979689	B	-0.0008653451222926	A	0.0174080692231655
1	71900001	72000000	B	-0.0155556006357073	B	-0.0032088332809507	A	0.0118056209757924	A	0.0028120763599872	A	0.0058985082432627	B	-0.0039467238821089	A	0.0165794044733047
1	72000001	72100000	B	-0.0161539111286401	A	0.0019988205749541	A	0.013308472931385	A	0.0046847169287502	A	0.0072023184038698	A	0.0067334026098251	A	0.0146663812920451
1	72100001	72200000	B	-0.0053769652731716	B	-3.65113e+10	A	0.0160748809576034	A	0.0103637697175145	A	0.0105875115841627	A	0.0300640016794204	A	0.0111563662067055
1	72200001	72300000	A	0.0215433463454246	A	0.0263827480375766	A	0.0327544622123241	A	0.0302244182676076	A	0.0311521813273429	A	0.0367441922426223	A	0.0245104953646659
1	72300001	72400000	A	0.0257077068090438	A	0.029472030699253	A	0.0342939272522926	A	0.0318429432809352	A	0.0318931713700294	A	0.0373410731554031	A	0.0284661781042814
1	72400001	72500000	A	0.0224855039268732	A	0.0280744489282369	A	0.0324892662465572	A	0.0293437875807285	A	0.028900358825922	A	0.0321193225681781	A	0.0289975646883249
1	72500001	72600000	A	0.0251492224633693	A	0.0275181327015161	A	0.0331765823066234	A	0.0313280522823333	A	0.0306185409426689	A	0.0345309004187583	A	0.0281556025147438
1	72600001	72700000	A	0.0257050544023513	A	0.0303018502891063	A	0.0332681387662887	A	0.0299540068954229	A	0.0318506471812725	A	0.0357363075017929	A	0.0257633011788129
1	72700001	72800000	A	0.029026823118329	A	0.0314709544181823	A	0.0336094796657562	A	0.0292988661676645	A	0.0326172597706317	A	0.0353863127529621	A	0.0266433283686637
1	72800001	72900000	A	0.0282782949507236	A	0.0294438879936933	A	0.0309217125177383	A	0.0277604963630437	A	0.0312094409018754	A	0.0337468758225441	A	0.0240285415202379
1	72900001	73000000	A	0.0287778563797473	A	0.0299671217799186	A	0.0303302034735679	A	0.0254174880683422	A	0.0275084767490625	A	0.0159647427499294	A	0.0183924380689859
1	73000001	73100000	A	0.0267157237976789	A	0.0290020816028118	A	0.0309479124844074	A	0.0238881278783082	A	0.0284481588751077	A	0.0077486587688326	A	0.0199032071977853
1	73100001	73200000	A	0.0272347182035446	A	0.0316975750029087	A	0.031181501224637	A	0.0223100185394287	A	0.0286642126739025	A	0.0006852230872027	A	0.0209813546389341
1	73200001	73300000	A	0.0268684867769479	A	0.029012182727456	A	0.0299538169056177	A	0.0214203987270593	A	0.0276401042938232	A	0.0011691035469993	A	0.0214258730411529
1	73300001	73400000	A	0.0283337291330099	A	0.0290573239326477	A	0.0292325392365455	A	0.0244191959500312	A	0.0267361029982566	A	0.0018585911020636	A	0.0193824805319309
1	73400001	73500000	A	0.0241462867707014	A	0.0268578808754682	A	0.027110181748867	A	0.0197437517344951	A	0.0262354277074337	A	0.0009712654282338	A	0.0180938374251127
1	73500001	73600000	A	0.0260584615170955	A	0.0292279180139303	A	0.0295810494571924	A	0.0200197342783212	A	0.0269449688494205	A	0.0041252956725656	A	0.0167974829673767
1	73600001	73700000	A	0.0293400734663009	A	0.0292122401297092	A	0.0286210514605045	A	0.0190313924103975	A	0.0274679698050022	A	0.0042541665025055	A	0.0170151125639677
1	73700001	73800000	A	0.0301222279667854	A	0.0297921150922775	A	0.0287840105593204	A	0.0225966311991214	A	0.0277683176100254	A	0.0027730532456189	A	0.0169206000864505
1	73800001	73900000	A	0.0262519642710685	A	0.0254603493958711	A	0.0281656458973884	A	0.0243717562407255	A	0.0285549387335777	A	0.0172258112579584	A	0.021155085414648
1	73900001	74000000	A	0.0345826148986816	A	0.0317023061215877	A	0.0360535979270935	A	0.033356312662363	A	0.034498780965805	A	0.0351661741733551	A	0.0299176312983036
1	74000001	74100000	A	0.0368753708899021	A	0.0342825129628181	A	0.0373271070420742	A	0.0380541756749153	A	0.0347373485565185	A	0.0367098785936832	A	0.0302956979721784
1	74100001	74200000	A	0.0378743447363376	A	0.0356493629515171	A	0.0386879444122314	A	0.0391047075390815	A	0.0345926620066165	A	0.037284143269062	A	0.0297087486833333
1	74200001	74300000	A	0.0362411104142665	A	0.0350190699100494	A	0.0365470089018344	A	0.0386430397629737	A	0.0341362655162811	A	0.0379382297396659	A	0.0289071183651685
1	74300001	74400000	A	0.0356253869831562	A	0.0339311510324478	A	0.037046480923891	A	0.037563432008028	A	0.033926822245121	A	0.0370340310037136	A	0.0299887545406818
1	74400001	74500000	A	0.0340559147298336	A	0.0305367149412632	A	0.0343909971415996	A	0.0325755439698696	A	0.02994822897017	A	0.0355668738484382	A	0.0233255364000797
1	74500001	74600000	A	0.0350156314671039	A	0.0332643687725067	A	0.0369796752929687	A	0.0380178019404411	A	0.0312586985528469	A	0.036118596792221	A	0.0242029633373022
1	74600001	74700000	A	0.0358820296823978	A	0.0343724973499774	A	0.0368727855384349	A	0.0384005010128021	A	0.0328702144324779	A	0.0359361767768859	A	0.0266691371798515
1	74700001	74800000	A	0.0363258235156536	A	0.0362918600440025	A	0.0379456877708435	A	0.0392094105482101	A	0.0340529754757881	A	0.036456000059843	A	0.0295771770179271
1	74800001	74900000	A	0.0377167761325836	A	0.0359624996781349	A	0.0381715558469295	A	0.0398065075278282	A	0.0344704315066337	A	0.0358713157474994	A	0.0311564747244119
1	74900001	75000000	A	0.0357318632304668	A	0.0339983291923999	A	0.0370988957583904	A	0.0376485250890255	A	0.0335719175636768	A	0.0361058823764324	A	0.030637752264738
1	75000001	75100000	A	0.0269500631839036	A	0.0252272821962833	A	0.0294663663953542	A	0.0256706941872835	A	0.0328024588525295	A	0.034676905721426	A	0.0296003390103578
1	75100001	75200000	A	0.033973004668951	A	0.0322111994028091	A	0.034303568303585	A	0.0342347770929336	A	0.033588845282793	A	0.0362139865756034	A	0.0297938659787178
1	75200001	75300000	A	0.0351994037628173	A	0.0344689488410949	A	0.0375729463994503	A	0.0377847254276275	A	0.0340774282813072	A	0.0365402437746524	A	0.0302002616226673
1	75300001	75400000	A	0.0358881652355194	A	0.0339462682604789	A	0.0375677272677421	A	0.0389119610190391	A	0.0343922898173332	A	0.0369882732629776	A	0.0310965497046709
1	75400001	75500000	A	0.0340318344533443	A	0.0328777432441711	A	0.0372862294316291	A	0.0351408794522285	A	0.0342169590294361	A	0.0364351719617843	A	0.0304531827569007
1	75500001	75600000	A	0.0341610573232173	A	0.0332171395421028	A	0.0378738567233085	A	0.0385795347392559	A	0.0340558215975761	A	0.0366761349141597	A	0.0308084078133106
1	75600001	75700000	A	0.0236515719443559	A	0.0235473830252885	A	0.0289200693368911	A	0.0254600867629051	A	0.0222159754484891	A	0.02583066560328	A	0.0211785715073347
1	75700001	75800000	A	0.012524832971394	A	0.015842406079173	A	0.0256567820906639	A	0.0203428603708744	A	0.0253551192581653	A	0.015962766483426	A	0.0267301462590694
1	75800001	75900000	A	0.0106811169534921	A	0.0087515590712428	A	0.0236631538718938	A	0.0174632612615823	A	0.0259348843246698	A	0.0073633403517305	A	0.0269949827343225
1	75900001	76000000	A	0.0118447989225387	A	0.0081244725733995	A	0.020613394677639	A	0.0148194842040538	A	0.0228989515453577	B	-0.001814022893086	A	0.0254835039377212
1	76000001	76100000	A	0.0165363904088735	A	0.012637392617762	A	0.0224816650152206	A	0.0142980404198169	A	0.0256362035870552	B	-0.0049579492770135	A	0.0280246566981077
1	76100001	76200000	A	0.0119090471416711	A	0.0105394721031188	A	0.0204587168991565	A	0.0120324976742267	A	0.0245696734637022	B	-0.0111348535865545	A	0.0280127357691526
1	76200001	76300000	A	0.0074368743225932	A	0.0129816997796297	A	0.0213976241648197	A	0.0116835869848728	A	0.0239065568894147	B	-0.0141764497384428	A	0.0285830032080411
1	76300001	76400000	A	0.006320874672383	A	0.0099658221006393	A	0.0175619255751371	A	0.0089171724393963	A	0.0226012151688337	B	-0.0161561910063028	A	0.0281239487230777
1	76400001	76500000	A	0.004788760561496	A	0.0108583308756351	A	0.0193390119820833	A	0.0073665780946612	A	0.0245552193373441	B	-0.019739594310522	A	0.0291318818926811
1	76500001	76600000	A	0.0037134743761271	A	0.0126762054860591	A	0.0198640115559101	A	0.0115175703540444	A	0.024772074073553	B	-0.0211903136223554	A	0.0288322586566209
1	76600001	76700000	A	0.003384114941582	A	0.0135881826281547	A	0.0178655050694942	A	0.0055138259194791	A	0.0246055331081151	B	-0.0172084253281354	A	0.0288367364555597
1	76700001	76800000	A	0.0008788186823949	A	0.0103544602170586	A	0.0194444861263036	A	0.0075466036796569	A	0.0243545025587081	B	-0.0168510004878044	A	0.0289041865617036
1	76800001	76900000	A	0.0027478670235723	A	0.0083188582211732	A	0.0232887510210275	A	0.0096384957432746	A	0.0252600070089101	B	-0.0161729864776134	A	0.028646545484662
1	76900001	77000000	A	0.0065111680887639	A	0.0089867766946554	A	0.0233153384178876	A	0.0142330676317214	A	0.0262385178357362	B	-0.0138238854706287	A	0.0294311009347438
1	77000001	77100000	A	0.0068853804841637	A	0.0077084992080926	A	0.0225938148796558	A	0.0143794417381286	A	0.0266374982893466	B	-0.0051365550607442	A	0.0294527541846036
1	77100001	77200000	A	0.0063423416577279	A	0.0086801508441567	A	0.0249180272221565	A	0.0173177402466535	A	0.028370352461934	B	-0.0006832949584349	A	0.029699619859457
1	77200001	77300000	A	0.0072625367902219	A	0.0073435697704553	A	0.0266941078007221	A	0.0199350621551275	A	0.0287250950932502	A	0.0049017150886356	A	0.0298120193183422
1	77300001	77400000	A	0.0112356636673212	A	0.0074709588661789	A	0.0285867322236299	A	0.0212436374276876	A	0.0290274396538734	A	0.013634143397212	A	0.0299161095172166
1	77400001	77500000	A	0.0140447029843926	A	0.0139952236786484	A	0.0300925187766551	A	0.0260633509606122	A	0.0299762487411499	A	0.0303730871528387	A	0.028998939320445
1	77500001	77600000	A	0.003979227039963	A	0.0059296637773513	A	0.0223869550973176	A	0.0177121628075838	A	0.0246206074953079	A	0.0111059341579675	A	0.0243333484977483
1	77600001	77700000	B	-0.001199233578518	B	-0.0011665821075439	A	0.023446962237358	A	0.0118419351056218	A	0.0261625405400991	B	-0.0050846175290644	A	0.0291084833443164
1	77700001	77800000	B	-0.0020354902371764	B	-0.0014572866493836	A	0.0226494614034891	A	0.0129693960770964	A	0.0232471451163291	B	-0.0109754195436835	A	0.0289939753711223
1	77800001	77900000	A	0.0006330847390927	A	0.0010299511486664	A	0.0233646556735038	A	0.0116294240579009	A	0.0229415260255336	B	-0.0103444196283817	A	0.0259192790836095
1	77900001	78000000	B	-0.0001896021713037	B	-0.0002881279215216	A	0.026895385235548	A	0.0199880078434944	A	0.0253915917128324	A	0.0037063432391732	A	0.0238210540264844
1	78000001	78100000	B	-0.0003590554988477	B	-0.0067149009555578	A	0.0279495120048522	A	0.02397296205163	A	0.0271364208310842	A	0.0013775717234238	A	0.0232937354594469
1	78100001	78200000	A	0.010505991987884	A	0.0024162393528968	A	0.0313416086137294	A	0.0256525296717882	A	0.0291579272598028	A	0.0163870211690664	A	0.0255895033478736
1	78200001	78300000	A	0.0134859979152679	A	0.0050689564086496	A	0.0290818493813276	A	0.0215867962688207	A	0.0287914965301752	A	0.0199266001582145	A	0.0251840762794017
1	78300001	78400000	A	0.0174551904201507	A	0.0080319494009017	A	0.0288221593946218	A	0.0245140921324491	A	0.0293071940541267	A	0.018852598965168	A	0.025352394208312
1	78400001	78500000	A	0.0126375807449221	A	0.0088752787560224	A	0.027335749939084	A	0.0228554029017686	A	0.0309588834643363	A	0.0329549610614776	A	0.0258708819746971
1	78500001	78600000	B	-0.0039235656149685	B	-0.0056961430236697	A	0.0194231402128934	A	0.0112752439454197	A	0.024703100323677	A	0.0292869508266448	A	0.0209603495895862
1	78600001	78700000	B	-0.0037241589743644	B	-0.0057025444693863	A	0.015542616136372	A	0.0091192163527011	A	0.023980651050806	A	0.0298467446118593	A	0.020092386752367
1	78700001	78800000	B	-0.0225151181221008	B	-0.0211493577808141	B	-0.0085797430947422	B	-0.0153680285438895	A	0.0016063242219388	B	-0.0022219312377274	A	0.0087066628038883
1	78800001	78900000	B	-0.0280142109841108	B	-0.0267840418964624	B	-0.014345827512443	B	-0.0221411827951669	B	-0.0093267066404223	B	-0.0149992862716317	A	0.0005866895080544
1	78900001	79000000	B	-0.0282449945807456	B	-0.0283643938601017	B	-0.0190920587629079	B	-0.0265760254114866	B	-0.0140605242922902	B	-0.0221427120268344	B	-0.004076671320945
1	79000001	79100000	B	-0.0284083597362041	B	-0.0302744358777999	B	-0.0234845522791147	B	-0.0299406927078962	B	-0.0185114480555057	B	-0.0253361947834491	B	-0.0065479823388159
1	79100001	79200000	B	-0.0295440722256898	B	-0.031027277931571	B	-0.0240456108003854	B	-0.0298139303922653	B	-0.0164700709283351	B	-0.0246569197624921	B	-0.0062863980419933
1	79200001	79300000	B	-0.0294833593070507	B	-0.0310597456991672	B	-0.0213944260030984	B	-0.0286444835364818	B	-0.0117289070039987	B	-0.0258792657405138	B	-0.0031067333184182
1	79300001	79400000	B	-0.0296629667282104	B	-0.0298100616782903	B	-0.0201543048024177	B	-0.0253992285579442	B	-0.006850529462099	B	-0.0230795256793499	A	0.0037895885761827
1	79400001	79500000	B	-0.0275296419858932	B	-0.0279817171394824	B	-0.0161598473787307	B	-0.0221131518483161	B	-0.0014365331735461	B	-0.0193982925266027	A	0.008033201098442
1	79500001	79600000	B	-0.024589704349637	B	-0.026828983798623	B	-0.01214509177953	B	-0.0184007212519645	A	0.0038769117090851	B	-0.016609538346529	A	0.010984843596816
1	79600001	79700000	B	-0.0163808893412351	B	-0.0167112220078706	B	-0.001823641359806	B	-0.0096551766619086	A	0.0113026639446616	B	-0.0004262171278242	A	0.0151049178093671
1	79700001	79800000	B	-0.0011020323727279	B	-0.0132040660828351	A	0.0031797192059457	B	-0.0016946949763223	A	0.0174463875591754	A	0.0156454425305128	A	0.0161934420466423
1	79800001	79900000	A	0.0117718670517206	B	-0.0227983631193637	B	-0.0050936490297317	B	-0.0117490282282233	A	0.0104998927563428	B	-0.0067582638002932	A	0.0101698320358991
1	79900001	80000000	A	0.0070868404582142	B	-0.0227068271487951	B	-0.0104240588843822	B	-0.0171644166111946	B	-0.0053093563765287	B	-0.023611769080162	A	0.0043860813602805
1	80000001	80100000	A	0.0045774932950735	B	-0.0166246201843023	B	-0.0120401456952095	B	-0.0204677004367113	B	-0.0018865247257053	B	-0.0227679964154958	A	0.0070969145745038
1	80100001	80200000	B	-0.0012351801851764	B	-0.0217359717935323	B	-0.0113932425156235	B	-0.0151375979185104	A	0.000595724908635	B	-0.0126495324075222	A	0.0050848596729338
1	80200001	80300000	A	0.003401878522709	B	-0.0076801916584372	A	0.0033601603936403	A	0.0017220138106495	A	0.0204622335731983	A	0.0230750497430562	A	0.0121686467900872
1	80300001	80400000	A	0.0027758579235523	B	-0.0113004567101597	A	0.0021583419293165	B	-0.0019938305485993	A	0.0170911680907011	A	0.0224190857261419	A	0.0091100586578249
1	80400001	80500000	B	-0.0110879819840192	B	-0.0265441834926605	B	-0.0094542717561125	B	-0.0176010020077228	A	6.07538e+10	B	-0.0146207921206951	A	0.0021087813656777
1	80500001	80600000	B	-0.0073199695907533	B	-0.0186564028263092	B	-0.0145896216854453	B	-0.0188442002981901	B	-0.0035961240064352	B	-0.0228005573153495	A	0.0031314566731452
1	80600001	80700000	B	-0.0085746822878718	B	-0.0195332989096641	B	-0.0141846686601638	B	-0.0200574658811092	B	-0.0063265319913625	B	-0.0187606140971183	A	0.0022051690611988
1	80700001	80800000	B	-0.0099097285419702	B	-0.0220256708562374	B	-0.0158209204673767	B	-0.0199410580098629	B	-0.0073350952006876	B	-0.0186245366930961	A	0.001238438533619
1	80800001	80900000	B	-0.0181523393839597	B	-0.0262866578996181	B	-0.0193980261683464	B	-0.0224685911089181	B	-0.0096917487680912	B	-0.0269488599151372	A	0.0004128550353925
1	80900001	81000000	B	-0.0289169233292341	B	-0.0329640731215477	B	-0.0235443022102117	B	-0.0308261215686798	B	-0.0120364660397171	B	-0.030884375795722	A	0.0015841640997678
1	81000001	81100000	B	-0.0289568398147821	B	-0.0325256548821926	B	-0.0242413394153118	B	-0.0297624580562114	B	-0.0094923945143818	B	-0.0303215142339468	A	0.0051282811909914
1	81100001	81200000	B	-0.0294023398309946	B	-0.0310409571975469	B	-0.0206588674336671	B	-0.0294070038944482	B	-0.0016416313592344	B	-0.0306495614349842	A	0.0064556682482361
1	81200001	81300000	B	-0.02439646422863	B	-0.0254633445292711	B	-0.0128942839801311	B	-0.0187348686158657	A	0.0017085914732888	B	-0.014825714752078	A	0.0044368756935
1	81300001	81400000	B	-0.0238078162074089	B	-0.0262436047196388	B	-0.0125700393691658	B	-0.0183969102799892	B	-0.0024024758022278	B	-0.0238820444792509	B	-0.0078792134299874
1	81400001	81500000	B	-0.0261687114834785	B	-0.0289415083825588	B	-0.0165723450481891	B	-0.0215367171913385	B	-0.0040524518117308	B	-0.0277443584054708	B	-0.0111815435811877
1	81500001	81600000	B	-0.0230234153568744	B	-0.0275011602789163	B	-0.0111964251846075	B	-0.0177965369075536	A	0.0102449841797351	B	-0.0188552364706993	A	0.0002844312693923
1	81600001	81700000	B	-0.0266988091170787	B	-0.0309271439909935	B	-0.0136179719120264	B	-0.0235079303383827	A	0.0091821318492293	B	-0.0218756012618541	B	-0.0034731663763523
1	81700001	81800000	B	-0.0271298848092556	B	-0.0294177588075399	B	-0.0138479182496666	B	-0.0229911189526319	A	0.0081847487017512	B	-0.024480003863573	B	-0.0037952510174363
1	81800001	81900000	B	-0.0264694783836603	B	-0.0270548909902572	B	-0.0131432134658098	B	-0.0210078861564397	A	0.0064126630313694	B	-0.0282356962561607	B	-0.0046790377236902
1	81900001	82000000	B	-0.0246547982096672	B	-0.020792743191123	B	-0.0104493238031864	B	-0.0189415570348501	A	0.0070827635936439	B	-0.0278286039829254	B	-0.0014028958976268
1	82000001	82100000	B	-0.0247344691306352	B	-0.0149843655526638	B	-0.0085042528808116	B	-0.020009646192193	A	0.008656607940793	B	-0.0276680886745452	B	-0.0005816558841615
1	82100001	82200000	B	-0.0193773712962865	B	-0.0020799462217837	B	-0.0070645352825522	B	-0.0158718116581439	A	0.0116023160517215	B	-0.025708083063364	A	0.0022928596008569
1	82200001	82300000	B	-0.0176172871142625	A	0.003029364394024	A	0.0006383698200806	B	-0.0041035059839487	A	0.0144715495407581	B	-0.0124621195718646	A	0.0038305588532239
1	82300001	82400000	B	-0.0140031808987259	B	-0.0170104596763849	A	0.0037815370596945	B	-0.0027504391036927	A	0.0130272191017866	B	-0.0046789380721747	A	0.0085963169112801
1	82400001	82500000	B	-0.0183831993490457	B	-0.0224215742200613	B	-0.0004047985712531	B	-0.0066507831215858	A	0.0016039916081354	B	-0.0183247663080692	B	-8.63814e+09
1	82500001	82600000	B	-0.0180626939982175	B	-0.0213303826749324	B	-0.0006783528951928	B	-0.0084276059642434	B	-0.0119877159595489	B	-0.0184406377375125	B	-0.0142342010512948
1	82600001	82700000	B	-0.0198306124657392	B	-0.0196659378707408	B	-0.0006926151108928	B	-0.0110821118578314	B	-0.010813326574862	B	-0.0124772358685731	B	-0.0159135814756155
1	82700001	82800000	B	-0.0113536715507507	B	-0.0128533234819769	A	0.0056852945126593	B	-0.0007450865814462	B	-0.0043351273052394	A	0.0159093290567398	B	-0.0119795491918921
1	82800001	82900000	B	-0.0060275234282016	B	-0.0079902810975909	A	0.0102187069132924	A	0.0046588843688368	B	-0.0019713263027369	A	0.0303616076707839	B	-0.0104755889624357
1	82900001	83000000	B	-0.0082980347797274	B	-0.0148297110572457	A	0.0041776397265493	B	-0.0024749187286943	B	-0.0131698036566376	A	0.0207159034907817	B	-0.0185772310942411
1	83000001	83100000	B	-0.0170185752213001	B	-0.0205199532210826	B	-0.0047448650002479	B	-0.0112561108544468	B	-0.0185663569718599	A	0.0069771157577633	B	-0.0218872372061014
1	83100001	83200000	B	-0.02029231749475	B	-0.0240881517529487	B	-0.0140440165996551	B	-0.0189382992684841	B	-0.0235668160021305	B	-0.0090649193152785	B	-0.025272786617279
1	83200001	83300000	B	-0.0276854820549488	B	-0.025729926303029	B	-0.0208227559924125	B	-0.0270655304193496	B	-0.0277995783835649	B	-0.0235601365566253	B	-0.0270191319286823
1	83300001	83400000	B	-0.0291067473590374	B	-0.0257201362401247	B	-0.0209724623709917	B	-0.0249066520482301	B	-0.027618121355772	B	-0.0215099230408668	B	-0.0266895722597837
1	83400001	83500000	B	-0.0302153080701828	B	-0.0296179018914699	B	-0.0235266145318746	B	-0.0299887415021657	B	-0.0301939472556114	B	-0.0202415436506271	B	-0.0282942168414592
1	83500001	83600000	B	-0.0316354446113109	B	-0.0314218886196613	B	-0.0265652183443307	B	-0.0327874943614006	B	-0.0308184754103422	B	-0.0231103431433439	B	-0.0289795584976673
1	83600001	83700000	B	-0.0293117053806781	B	-0.0313079431653022	B	-0.0264583937823772	B	-0.0302076246589422	B	-0.030465830117464	B	-0.0253133885562419	B	-0.0279647875577211
1	83700001	83800000	B	-0.0253292322158813	B	-0.0286398716270923	B	-0.0177342779934406	B	-0.0234051942825317	B	-0.0209999568760395	B	-0.0154130719602108	B	-0.0160471182316541
1	83800001	83900000	B	-0.0287799090147018	B	-0.0320305749773979	B	-0.0176819209009408	B	-0.0246513150632381	B	-0.019555639475584	B	-0.0171293355524539	B	-0.0067654401063919
1	83900001	84000000	B	-0.0296564698219299	B	-0.0305753331631422	B	-0.0181331671774387	B	-0.0268606543540954	B	-0.0200549010187387	B	-0.0188210420310497	B	-0.0067519075237214
1	84000001	84100000	B	-0.0278536062687635	B	-0.0307417921721935	B	-0.0189525503665208	B	-0.0259703136980533	B	-0.020287649706006	B	-0.0156055586412549	B	-0.0067202509380877
1	84100001	84200000	B	-0.0234741661697626	B	-0.0282860118895769	B	-0.0155469132587313	B	-0.0197857599705457	B	-0.0176591854542493	A	0.0013650777982547	B	-0.0066400449723005
1	84200001	84300000	B	-0.0253951791673898	B	-0.0273090936243534	B	-0.0164878740906715	B	-0.0224845521152019	B	-0.0177421569824218	A	0.0104348268359899	B	-0.0079216388985514
1	84300001	84400000	B	-0.0260418355464935	B	-0.0291729010641574	B	-0.0177135616540908	B	-0.0265744440257549	B	-0.0176641009747982	A	0.0077962484210729	B	-0.0099814897403121
1	84400001	84500000	B	-0.0250683352351188	B	-0.0293950662016868	B	-0.0187308881431818	B	-0.0230964142829179	B	-0.017455231398344	A	0.0028203912079334	B	-0.0085262320935726
1	84500001	84600000	B	-0.0236358866095542	B	-0.0281665567308664	B	-0.0158785581588745	B	-0.0233461055904626	B	-0.0152848362922668	B	-0.0020455350168049	B	-0.0071185096167027
1	84600001	84700000	B	-0.0223494078963994	B	-0.025249283760786	B	-0.0137578230351209	B	-0.0214133113622665	B	-0.0113720949739217	A	0.0191027447581291	B	-0.006280330941081
1	84700001	84800000	B	-0.0044900705106556	B	-0.0053620752878487	A	0.000408729276387	B	-0.0005508882459253	A	1.60508e+11	A	0.0331352911889553	B	-0.0062688793987035
1	84800001	84900000	B	-0.0093602938577532	B	-0.0087907845154404	B	-0.007314393762499	B	-0.0121502112597227	B	-0.0049806428141891	A	0.0336528234183788	B	-0.0107862139120697
1	84900001	85000000	B	-0.017830342054367	B	-0.0209463573992252	B	-0.0160501338541507	B	-0.0203909501433372	B	-0.019585408270359	A	0.0221276544034481	B	-0.0204583778977394
1	85000001	85100000	A	-0.0	A	-0.0	A	0.0	A	0.0	A	-0.0	B	-0.0153492027893662	A	0.0
1	85100001	85200000	A	-0.0	A	-0.0	A	0.0	A	0.0	A	-0.0	A	-0.0	A	0.0
1	85200001	85300000	A	-0.0	A	-0.0	A	0.0	A	0.0	B	-0.0258400216698646	B	-0.0215697586536407	B	-0.0237634591758251
1	85300001	85400000	A	-0.0	A	-0.0	A	0.0	A	0.0	A	-0.0	A	-0.0	A	0.0
1	85400001	85500000	A	-0.0	A	-0.0	A	0.0	A	0.0	A	-0.0	A	-0.0	A	0.0
1	85500001	85600000	A	-0.0	A	-0.0	A	0.0	A	0.0	B	-0.0265357419848442	B	-0.0195944961160421	B	-0.0241786502301692
1	85600001	85700000	B	-0.0185430850833654	B	-0.0225500501692295	B	-0.0160008314996957	B	-0.0215012282133102	B	-0.0251615978777408	B	-0.0024790361057966	B	-0.0271311365067958
1	85700001	85800000	B	-0.0131768137216568	B	-0.0176256354898214	B	-0.0079747419804334	B	-0.0162298772484064	B	-0.0134958438575267	A	0.0208451244980096	B	-0.0203061942011117
1	85800001	85900000	B	-0.005419488530606	A	0.0020323663484305	A	0.0059416587464511	A	0.0017315503209829	A	0.0001910947175929	A	0.0289885438978672	B	-0.005961681716144
1	85900001	86000000	A	0.006605037022382	A	0.0118191996589303	A	0.0131386304274201	A	0.0052867028862237	A	0.0058953408151865	A	0.0320870801806449	B	-0.0007292166119441
1	86000001	86100000	A	0.0154984351247549	A	0.017256474122405	A	0.0233376733958721	A	0.0206090863794088	A	0.0133174760267138	A	0.0364842116832733	A	0.0017536099767312
1	86100001	86200000	A	0.0247555319219827	A	0.0259388070553541	A	0.0308030489832162	A	0.0315642580389976	A	0.0238739512860775	A	0.0363799557089805	A	0.0094838924705982
1	86200001	86300000	A	0.0290277767926454	A	0.0277910083532333	A	0.0343039110302925	A	0.0330283716320991	A	0.0268967933952808	A	0.0361078269779682	A	0.0123855741694569
1	86300001	86400000	A	0.0310591571033	A	0.0310138128697872	A	0.0364341810345649	A	0.0361609421670436	A	0.0297291167080402	A	0.0347365289926528	A	0.0171586498618125
1	86400001	86500000	A	0.0348575823009014	A	0.0339299850165843	A	0.0367956757545471	A	0.0376631431281566	A	0.0310935769230127	A	0.0342786721885204	A	0.0233612433075904
1	86500001	86600000	A	0.0351853407919406	A	0.0353910513222217	A	0.0379182621836662	A	0.0372117236256599	A	0.0324182212352752	A	0.0350198335945606	A	0.024552347138524
1	86600001	86700000	A	0.033381812274456	A	0.0334704741835594	A	0.0358460545539855	A	0.0333505980670452	A	0.0309640243649482	A	0.035849817097187	A	0.0240201726555824
1	86700001	86800000	A	0.0323975570499897	A	0.031540747731924	A	0.0319056026637554	A	0.0275584738701581	A	0.0251986123621463	A	0.0276306197047233	A	0.0201118979603052
1	86800001	86900000	A	0.0302612390369176	A	0.0319333188235759	A	0.0308066606521606	A	0.0287988018244504	A	0.0242515075951814	A	0.0258290637284517	A	0.0192700121551752
1	86900001	87000000	A	0.0296779908239841	A	0.0295047108083963	A	0.0303883906453847	A	0.0271821208298206	A	0.02561641857028	A	0.0261469688266515	A	0.0198467653244733
1	87000001	87100000	A	0.0349013656377792	A	0.0327913910150527	A	0.0351794101297855	A	0.0337799079716205	A	0.0292912125587463	A	0.0320033989846706	A	0.0229571722447872
1	87100001	87200000	A	0.0362356752157211	A	0.0348480232059955	A	0.0370170883834362	A	0.0367377698421478	A	0.030605100095272	A	0.0351101085543632	A	0.0250900574028491
1	87200001	87300000	A	0.036538228392601	A	0.0344044491648674	A	0.0366359204053878	A	0.0362554788589477	A	0.03254259750247	A	0.0361504703760147	A	0.024131990969181
1	87300001	87400000	A	0.0353914350271225	A	0.0351255647838115	A	0.0367896482348442	A	0.0369610041379928	A	0.0319146662950515	A	0.0358261130750179	A	0.0227031055837869
1	87400001	87500000	A	0.0323148407042026	A	0.0315221920609474	A	0.0350430272519588	A	0.0326258987188339	A	0.0309373904019594	A	0.0357196144759655	A	0.0202702172100543
1	87500001	87600000	A	0.0342944450676441	A	0.0333194136619567	A	0.0347237065434455	A	0.0334455221891403	A	0.0284919310361146	A	0.0345080271363258	A	0.0185613464564085
1	87600001	87700000	A	0.0351297631859779	A	0.0340163372457027	A	0.0349269993603229	A	0.0330404080450534	A	0.0276149902492761	A	0.0354227125644683	A	0.0170607566833496
1	87700001	87800000	A	0.0328374654054641	A	0.0316444635391235	A	0.0361776836216449	A	0.0345419645309448	A	0.0301500186324119	A	0.0353749580681324	A	0.0194872710853815
1	87800001	87900000	A	0.0357721410691738	A	0.0348483957350254	A	0.0366795137524604	A	0.0360945537686347	A	0.0312486737966537	A	0.0352062098681926	A	0.021560713648796
1	87900001	88000000	A	0.0327153392136096	A	0.0311264283955097	A	0.0342893227934837	A	0.033216793090105	A	0.0304288081824779	A	0.0334659144282341	A	0.0190438404679298
1	88000001	88100000	A	0.0281919278204441	A	0.0282353572547435	A	0.029604123905301	A	0.0263777282088994	A	0.0241021774709224	A	0.0195113737136125	A	0.0117652425542473
1	88100001	88200000	A	0.02703189663589	A	0.0272392183542251	A	0.0292548947036266	A	0.0236034076660871	A	0.0214293897151947	A	0.017597684636712	A	0.0091398367658257
1	88200001	88300000	B	-0.0081586129963397	B	-0.0068204537965357	B	-0.0051893992349505	B	-0.0080535830929875	B	-0.0069860056973993	B	-0.0010567997815087	B	-0.0107979141175746
1	88300001	88400000	A	0.0145445857197046	A	0.0256040822714567	A	0.0292992573231458	A	0.0313816033303737	A	0.0294028427451849	A	0.0221230816096067	A	0.0273430701345205
1	88400001	88500000	A	0.0310788657516241	A	0.0281079374253749	A	0.0331902243196964	A	0.0300622880458831	A	0.0312401559203863	A	0.0280613750219345	A	0.0302026160061359
1	88500001	88600000	A	0.0313571989536285	A	0.030086450278759	A	0.032444953918457	A	0.0292592551559209	A	0.030594166368246	A	0.0266452264040708	A	0.0297565460205078
1	88600001	88700000	A	0.0319872461259365	A	0.0313742086291313	A	0.033929668366909	A	0.0310294684022665	A	0.0312924049794673	A	0.0317188464105129	A	0.0301122982054948
1	88700001	88800000	A	0.0308437552303075	A	0.027554340660572	A	0.0324493013322353	A	0.0280302446335554	A	0.0306588169187307	A	0.0280058626085519	A	0.0297970715910196
1	88800001	88900000	A	0.0283399168401956	A	0.0258310176432132	A	0.0313076414167881	A	0.0280690640211105	A	0.0295851454138755	A	0.0246693696826696	A	0.0301517061889171
1	88900001	89000000	A	0.0296925138682127	A	0.0290266778320074	A	0.0323224738240242	A	0.0298004634678363	A	0.0292719155550003	A	0.0274112056940794	A	0.0298564061522483
1	89000001	89100000	A	0.0303918812423944	A	0.0289048198610544	A	0.0330070778727531	A	0.0305056720972061	A	0.0309529043734073	A	0.0323701202869415	A	0.0301994439214468
1	89100001	89200000	A	0.0312152113765478	A	0.0293889120221138	A	0.0314078032970428	A	0.0249321721494197	A	0.0318399593234062	A	0.0310138463973999	A	0.0305122826248407
1	89200001	89300000	A	0.0265191197395324	A	0.0264400709420442	A	0.0311478357762098	A	0.0264470800757408	A	0.0306996405124664	A	0.0240805801004171	A	0.0295140761882066
1	89300001	89400000	A	0.0304497722536325	A	0.0285328365862369	A	0.0326025895774364	A	0.0298210736364126	A	0.0298426114022731	A	0.0237703807651996	A	0.0294685456901788
1	89400001	89500000	A	0.0314748398959636	A	0.0297372136265039	A	0.0336734540760517	A	0.0330005399882793	A	0.0320217460393905	A	0.0317469276487827	A	0.030577128753066
1	89500001	89600000	A	0.0306934956461191	A	0.0301801934838295	A	0.0328388810157775	A	0.0318704061210155	A	0.0324360765516757	A	0.0316615775227546	A	0.0313730798661708
1	89600001	89700000	A	0.0293188076466321	A	0.0253720637410879	A	0.0314848385751247	A	0.026689201593399	A	0.031832966953516	A	0.0308526940643787	A	0.0304751731455326
1	89700001	89800000	A	0.0300703719258308	A	0.0248370226472616	A	0.0341827869415283	A	0.0327962040901184	A	0.0303322523832321	A	0.0308029390871524	A	0.0293478574603796
1	89800001	89900000	A	0.0293705891817808	A	0.0244919769465923	A	0.0345298424363136	A	0.0321013294160366	A	0.0298823062330484	A	0.0338734202086925	A	0.0291624292731285
1	89900001	90000000	A	0.030163437128067	A	0.0248413607478141	A	0.034998346120119	A	0.0326465740799903	A	0.0319535061717033	A	0.0351479426026344	A	0.0303801726549863
1	90000001	90100000	A	0.0270488932728767	A	0.0225402805954217	A	0.0318555869162082	A	0.02890370413661	A	0.0312208700925111	A	0.0274124089628458	A	0.0302908346056938
1	90100001	90200000	A	0.0278927832841873	A	0.0239906050264835	A	0.0330235958099365	A	0.0318106338381767	A	0.0318691357970237	A	0.0270354002714157	A	0.0309253316372632
1	90200001	90300000	A	0.0311750397086143	A	0.0262920539826154	A	0.0340613387525081	A	0.0334047600626945	A	0.0318410359323024	A	0.0257723331451416	A	0.0308313686400651
1	90300001	90400000	A	0.0260756257921457	A	0.0243865605443716	A	0.0329709015786647	A	0.0313294790685176	A	0.0309330876916646	A	0.0212546102702617	A	0.0304985716938972
1	90400001	90500000	A	0.02811736240983	A	0.0275684557855129	A	0.0336055047810077	A	0.0326335653662681	A	0.0312305223196744	A	0.0252847932279109	A	0.0304754525423049
1	90500001	90600000	A	0.0261396039277315	A	0.026768485084176	A	0.0326458513736724	A	0.0280055981129407	A	0.0313003063201904	A	0.0289055053144693	A	0.030051989480853
1	90600001	90700000	A	0.0307376850396394	A	0.028234964236617	A	0.0335016883909702	A	0.0321576185524463	A	0.028805648908019	A	0.0206954535096883	A	0.0270313806831836
1	90700001	90800000	A	0.030077626928687	A	0.0287636294960975	A	0.033650878816843	A	0.0329503491520881	A	0.0276859235018491	A	0.0157698467373847	A	0.0270944591611623
1	90800001	90900000	A	0.0283116642385721	A	0.027099834755063	A	0.0321992672979831	A	0.0301257092505693	A	0.0274209603667259	A	0.0219425968825817	A	0.0252494532614946
1	90900001	91000000	A	0.0301672331988811	A	0.0285953897982835	A	0.0321527309715747	A	0.0290317125618457	A	0.031257726252079	A	0.029460297897458	A	0.0279468446969985
1	91000001	91100000	A	0.0341446362435817	A	0.0328620672225952	A	0.034265898168087	A	0.0337862819433212	A	0.0321709662675857	A	0.0308282822370529	A	0.029775533825159
1	91100001	91200000	A	0.031630054116249	A	0.0300634689629077	A	0.0340687744319438	A	0.0332797914743423	A	0.0301186200231313	A	0.0279298145323991	A	0.0278080031275749
1	91200001	91300000	A	0.0348288975656032	A	0.0334887877106666	A	0.0353295430541038	A	0.0359216034412384	A	0.0324301309883594	A	0.0330291017889976	A	0.0285877771675586
1	91300001	91400000	A	0.0359003394842147	A	0.0331897549331188	A	0.0364738218486309	A	0.0362337790429592	A	0.0337054394185543	A	0.036188468337059	A	0.0291976016014814
1	91400001	91500000	A	0.0354667231440544	A	0.0339870639145374	A	0.0367741212248802	A	0.0371829010546207	A	0.0336462408304214	A	0.0360395833849906	A	0.0291586015373468
1	91500001	91600000	A	0.0336027294397354	A	0.0318275950849056	A	0.0356581881642341	A	0.0341055318713188	A	0.0326438136398792	A	0.0351271294057369	A	0.0266294796019792
1	91600001	91700000	A	0.0335576608777046	A	0.0316948741674423	A	0.0344997942447662	A	0.0331598557531833	A	0.0281988158822059	A	0.0280890762805938	A	0.0231306515634059
1	91700001	91800000	A	0.032472763210535	A	0.0301913507282733	A	0.0356603190302848	A	0.0341530293226242	A	0.0285345893353223	A	0.0281819906085729	A	0.0242370702326297
1	91800001	91900000	A	0.0342091135680675	A	0.0308567937463521	A	0.0366979725658893	A	0.0363084860146045	A	0.0292013529688119	A	0.028885455802083	A	0.0241478830575943
1	91900001	92000000	A	0.0313814282417297	A	0.0285214409232139	A	0.033230111002922	A	0.0307205598801374	A	0.0310093369334936	A	0.0325136072933673	A	0.0266082771122455
1	92000001	92100000	A	0.0337802842259407	A	0.0306272488087415	A	0.033166941255331	A	0.0345041863620281	A	0.0312021784484386	A	0.031044915318489	A	0.0288545340299606
1	92100001	92200000	A	0.0329795219004154	A	0.0308035109192132	A	0.0343293137848377	A	0.0326255001127719	A	0.0314256623387336	A	0.0343524254858493	A	0.0293040871620178
1	92200001	92300000	A	0.0323442481458187	A	0.0270797349512577	A	0.0343588404357433	A	0.033777505159378	A	0.0297951363027095	A	0.029888566583395	A	0.0295955147594213
1	92300001	92400000	A	0.0316196531057357	A	0.0257188417017459	A	0.0340022630989551	A	0.0334285460412502	A	0.0290614534169435	A	0.0321663096547126	A	0.029074827209115
1	92400001	92500000	A	0.0333654843270778	A	0.0288892202079296	A	0.0346527062356472	A	0.0330611392855644	A	0.0301496442407369	A	0.0337820537388324	A	0.025954470038414
1	92500001	92600000	A	0.0314697660505771	A	0.0247837789356708	A	0.0336128026247024	A	0.031791154295206	A	0.0244729649275541	A	0.0244430508464574	A	0.0183386001735925
1	92600001	92700000	A	0.0357959531247615	A	0.0312558598816394	A	0.0366685278713703	A	0.0368837714195251	A	0.0308216493576765	A	0.0311820525676012	A	0.0246505923569202
1	92700001	92800000	A	0.0369040705263614	A	0.0332667157053947	A	0.0367623604834079	A	0.0380337089300155	A	0.0307553205639123	A	0.0290030110627412	A	0.0259724576026201
1	92800001	92900000	A	0.0350263193249702	A	0.0333984084427356	A	0.0367438159883022	A	0.0367884896695613	A	0.0324932932853698	A	0.0337181650102138	A	0.0265863724052906
1	92900001	93000000	A	0.0347979702055454	A	0.0344649702310562	A	0.0366615056991577	A	0.0385808609426021	A	0.0332469940185546	A	0.0368789695203304	A	0.0259307119995355
1	93000001	93100000	A	0.0351227298378944	A	0.0328262560069561	A	0.0364194065332412	A	0.0352657064795494	A	0.0326880663633346	A	0.0355452336370945	A	0.0244942028075456
1	93100001	93200000	A	0.0355562046170234	A	0.0341918468475341	A	0.036647293716669	A	0.0384344868361949	A	0.0326206125319004	A	0.036747645586729	A	0.0257342532277107
1	93200001	93300000	A	0.0348220132291317	A	0.0335845351219177	A	0.0361882112920284	A	0.0364118814468383	A	0.0320940092206001	A	0.0366914495825767	A	0.0252599529922008
1	93300001	93400000	A	0.0329637974500656	A	0.0323052182793617	A	0.0363842062652111	A	0.0373031720519065	A	0.0314359813928604	A	0.0361478142440319	A	0.0231350157409906
1	93400001	93500000	A	0.0301919523626565	A	0.0325673185288906	A	0.0352892130613327	A	0.0378074496984481	A	0.0305107999593019	A	0.0356463193893432	A	0.0222211200743913
1	93500001	93600000	A	0.0275135077536106	A	0.0307834483683109	A	0.0327065549790859	A	0.0330942422151565	A	0.0299097262322902	A	0.0358998328447341	A	0.0210571512579917
1	93600001	93700000	A	0.0266439002007246	A	0.0283159110695123	A	0.0327655784785747	A	0.0327961184084415	A	0.0298365708440542	A	0.0358136408030986	A	0.0214916504919528
1	93700001	93800000	A	0.0270070694386959	A	0.0273106843233108	A	0.0306414868682622	A	0.0310306381434202	A	0.0287444554269313	A	0.0353133156895637	A	0.0193094220012426
1	93800001	93900000	A	0.014890325255692	A	0.0135784670710563	A	0.0193704739212989	A	0.0171714592725038	A	0.0217575710266828	A	0.0310585685074329	A	0.0103409076109528
1	93900001	94000000	A	-0.0	A	-0.0	A	0.0	A	0.0	A	-0.0	A	-0.0	A	0.0
1	94000001	94100000	B	-0.0040940502658486	B	-0.0016507055843248	B	-0.0040834182873368	B	-0.0109927812591195	B	-0.0073151472024619	A	0.0158968660980463	B	-0.0150824319571256
1	94100001	94200000	B	-0.0204974617809057	B	-0.0193879473954439	B	-0.0244224052876234	B	-0.0271491464227437	B	-0.0211763437837362	B	-0.0159487798810005	B	-0.0207669697701931
1	94200001	94300000	B	-0.0237906035035848	B	-0.0194148011505603	B	-0.0267132427543401	B	-0.0280063413083553	B	-0.0269026830792427	B	-0.0184781160205602	B	-0.0255285557359457
1	94300001	94400000	B	-0.0271661859005689	B	-0.0214884970337152	B	-0.030071111395955	B	-0.0318725742399692	B	-0.0280244350433349	B	-0.0212820712476968	B	-0.0256329104304313
1	94400001	94500000	B	-0.0257197692990303	B	-0.024232005700469	B	-0.0284249875694513	B	-0.0317301377654075	B	-0.0259466562420129	B	-0.0246485192328691	B	-0.0224763844162225
1	94500001	94600000	B	-0.0269094333052635	B	-0.02774378657341	B	-0.0289831310510635	B	-0.0312009248882532	B	-0.025210253894329	B	-0.0274751689285039	B	-0.0223647207021713
1	94600001	94700000	B	-0.0240510124713182	B	-0.0281258895993232	B	-0.0278551541268825	B	-0.030613349750638	B	-0.024309454485774	B	-0.0293532963842153	B	-0.0227185357362031
1	94700001	94800000	B	-0.0234679263085126	B	-0.025480518117547	B	-0.0271403938531875	B	-0.0272069163620471	B	-0.0206909216940403	B	-0.0244262758642435	B	-0.0185875128954648
1	94800001	94900000	B	-0.022895460948348	B	-0.0291528794914484	B	-0.0266971830278635	B	-0.0306735299527645	B	-0.0218339264392852	B	-0.0236206948757171	B	-0.0206718798726797
1	94900001	95000000	B	-0.0224671177566051	B	-0.0289461351931095	B	-0.0276006609201431	B	-0.029724383726716	B	-0.0220807287842035	B	-0.0228496976196765	B	-0.0187676716595888
1	95000001	95100000	B	-0.0248043853789567	B	-0.029663186520338	B	-0.0280185285955667	B	-0.0314892567694187	B	-0.0236800853163003	B	-0.0200729221105575	B	-0.0196742881089448
1	95100001	95200000	B	-0.0238057114183902	B	-0.0279747173190116	B	-0.028149127960205	B	-0.0289049334824085	B	-0.0244689900428056	B	-0.0243096705526113	B	-0.0211334433406591
1	95200001	95300000	B	-0.0182866863906383	B	-0.0233759675174951	B	-0.0225496366620063	B	-0.0240099262446165	B	-0.0181278996169567	B	-0.0178091321140527	B	-0.0132431164383888
1	95300001	95400000	B	-0.0211122967302799	B	-0.0246819593012332	B	-0.0242223553359508	B	-0.0238196700811386	B	-0.0142837660387158	B	-0.0200156792998313	B	-0.0109993247315287
1	95400001	95500000	B	-0.0247438661754131	B	-0.0296979304403066	B	-0.0255539435893297	B	-0.0298034287989139	B	-0.0201822966337203	B	-0.0219981018453836	B	-0.0174987930804491
1	95500001	95600000	B	-0.025075688958168	B	-0.0277062747627496	B	-0.0265597030520439	B	-0.03073450922966	B	-0.0199825074523687	B	-0.0226518046110868	B	-0.0169561747461557
1	95600001	95700000	B	-0.0226214881986379	B	-0.0267856940627098	B	-0.022137900814414	B	-0.0233209859579801	B	-0.0104121211916208	B	-0.0149436322972178	B	-0.0093421442434191
1	95700001	95800000	B	-0.0221376959234476	B	-0.0253283977508544	B	-0.0246519278734922	B	-0.0293463058769702	B	-0.0200159233063459	B	-0.012620735913515	B	-0.0199995189905166
1	95800001	95900000	B	-0.0226536318659782	B	-0.0266604628413915	B	-0.0263418219983577	B	-0.0291095729917287	B	-0.0258517153561115	B	-0.025972006842494	B	-0.026647076010704
1	95900001	96000000	B	-0.0272093545645475	B	-0.0312438625842332	B	-0.0302313435822725	B	-0.0302330460399389	B	-0.0224795714020729	B	-0.0283087398856878	B	-0.0246067214757204
1	96000001	96100000	B	-0.027714742347598	B	-0.0274356808513402	B	-0.0291808806359767	B	-0.0303571969270706	B	-0.014614388346672	B	-0.0298079960048198	B	-0.0196704417467117
1	96100001	96200000	B	-0.0253954008221626	B	-0.0289032645523548	B	-0.0296261124312877	B	-0.031972300261259	B	-0.0240006241947412	B	-0.0283182766288518	B	-0.0246158130466938
1	96200001	96300000	B	-0.0255632475018501	B	-0.0302879270166158	B	-0.029164370149374	B	-0.0301138199865818	B	-0.0207282956689596	B	-0.0276127364486455	B	-0.0195141676813364
1	96300001	96400000	B	-0.0277717038989067	B	-0.0313180424273014	B	-0.0288940127938985	B	-0.0303509533405303	B	-0.0180490761995315	B	-0.0278750099241733	B	-0.0149736683815717
1	96400001	96500000	B	-0.0261601898819208	B	-0.030150169506669	B	-0.0280842464417219	B	-0.0309786144644022	B	-0.0215168949216604	B	-0.022738991305232	B	-0.0190267041325569
1	96500001	96600000	B	-0.0259873084723949	B	-0.0285311508923769	B	-0.0274860393255949	B	-0.0294649489223957	B	-0.023581076413393	B	-0.0255196709185838	B	-0.0220235250890254
1	96600001	96700000	B	-0.0276485532522201	B	-0.0317369699478149	B	-0.0303698685020208	B	-0.033494085073471	B	-0.0270944125950336	B	-0.0238376911729574	B	-0.0272480603307485
1	96700001	96800000	B	-0.0256092827767133	B	-0.0307654980570077	B	-0.0258514638990163	B	-0.030312281101942	B	-0.0200206041336059	B	-0.0181403569877147	B	-0.0218111611902713
1	96800001	96900000	B	-0.028059534728527	B	-0.0317650660872459	B	-0.0283813085407018	B	-0.0303598958998918	B	-0.0219113919883966	B	-0.0050901188515126	B	-0.0227664038538932
1	96900001	97000000	B	-0.0308621209114789	B	-0.0335540995001792	B	-0.03054179251194	B	-0.0330174267292022	B	-0.0309405289590358	B	-0.0215116534382104	B	-0.0308542214334011
1	97000001	97100000	B	-0.0291480310261249	B	-0.0342232957482337	B	-0.0322189182043075	B	-0.036000445485115	B	-0.0293890740722417	B	-0.023821584880352	B	-0.0292994324117898
1	97100001	97200000	B	-0.028567936271429	B	-0.0326573587954044	B	-0.0328199826180934	B	-0.0360188446938991	B	-0.031979039311409	B	-0.0307059306651353	B	-0.0316547341644763
1	97200001	97300000	B	-0.0293682534247636	B	-0.0344819463789463	B	-0.0340099707245826	B	-0.0346057675778865	B	-0.0318761616945266	B	-0.0290016345679759	B	-0.0319722406566143
1	97300001	97400000	B	-0.029875386506319	B	-0.0344256162643432	B	-0.0331606566905975	B	-0.0349216982722282	B	-0.0300398226827383	B	-0.0279256589710712	B	-0.0308949183672666
1	97400001	97500000	B	-0.0297242775559425	B	-0.0351207293570041	B	-0.033222060650587	B	-0.0356662794947624	B	-0.0272182058542966	B	-0.0259983520954847	B	-0.0294090043753385
1	97500001	97600000	B	-0.0296708140522241	B	-0.0330656208097934	B	-0.0291373245418071	B	-0.0324403271079063	B	-0.0082023544237017	B	-0.0231075789779424	B	-0.020365746691823
1	97600001	97700000	B	-0.0230011511594057	B	-0.0246032904833555	B	-0.0177147332578897	B	-0.0226305741816759	B	-0.000460149574792	B	-0.0006994993891566	B	-0.0099752936512231
1	97700001	97800000	B	-0.0147090991958975	B	-0.0091470079496502	B	-0.0085470788180828	B	-0.0106790466234087	B	-0.0005679269670508	A	0.0185932368040084	B	-0.0043969377875328
1	97800001	97900000	B	-0.0242350418120622	B	-0.0126950144767761	B	-0.0154943447560071	B	-0.02189951390028	B	-0.0019663330167531	B	-0.0062596453353762	B	-0.0032232510857284
1	97900001	98000000	B	-0.0228607952594757	A	0.0003404236922506	B	-0.010266114026308	B	-0.0161703266203403	A	0.0040816012769937	B	-0.010354770347476	A	0.0060930666513741
1	98000001	98100000	B	-0.0206459201872348	A	0.0002341314102523	B	-0.0104899695143103	B	-0.0178284328430891	A	0.0088415406644344	B	-0.0021688749548047	A	0.0073079755529761
1	98100001	98200000	B	-0.0229328088462352	B	-0.0165508203208446	B	-0.0171133074909448	B	-0.0233629569411277	A	0.0017619236605241	B	-0.017791923135519	A	0.0043094353750348
1	98200001	98300000	B	-0.0268724765628576	B	-0.0255663227289915	B	-0.0255185086280107	B	-0.0287047382444143	B	-0.0209438670426607	B	-0.0286241825670003	B	-0.0065407319925725
1	98300001	98400000	B	-0.0262315217405557	B	-0.0284347962588071	B	-0.0265478994697332	B	-0.0305325407534837	B	-0.0242185294628143	B	-0.0242374166846275	B	-0.0160442925989627
1	98400001	98500000	B	-0.0310582034289836	B	-0.0311380811035633	B	-0.0298267677426338	B	-0.0339644663035869	B	-0.0295743476599454	B	-0.026729917153716	B	-0.0286795608699321
1	98500001	98600000	B	-0.0295769292861223	B	-0.0274884831160306	B	-0.0290104858577251	B	-0.0308714807033538	B	-0.0279753822833299	B	-0.0271653346717357	B	-0.0284959971904754
1	98600001	98700000	B	-0.0273642968386411	B	-0.0230117943137884	B	-0.0279505159705877	B	-0.0300242416560649	B	-0.0281895454972982	B	-0.0212341006845235	B	-0.0301854703575372
1	98700001	98800000	B	-0.0217501260340213	B	-0.0154882008209824	B	-0.023748630657792	B	-0.0252537578344345	B	-0.0257169678807258	B	-0.0259713642299175	B	-0.0299809090793132
1	98800001	98900000	B	-0.0247019715607166	B	-0.0226747412234544	B	-0.0261116754263639	B	-0.0281989481300115	B	-0.0290400180965662	B	-0.0269388407468795	B	-0.0312190800905227
1	98900001	99000000	B	-0.0275699142366647	B	-0.0208785533905029	B	-0.0278133135288953	B	-0.0294742565602064	B	-0.0300830006599426	B	-0.024631617590785	B	-0.0312378145754337
1	99000001	99100000	B	-0.0271548051387071	B	-0.0233578514307737	B	-0.0288498271256685	B	-0.0297139920294284	B	-0.0307385493069887	B	-0.0319264121353626	B	-0.0314929857850074
1	99100001	99200000	B	-0.0262419898062944	B	-0.0246665868908166	B	-0.027587354183197	B	-0.0294885020703077	B	-0.0304029788821935	B	-0.0306855197995901	B	-0.0318507216870784
1	99200001	99300000	B	-0.0247684549540281	B	-0.0245962794870138	B	-0.0268940478563308	B	-0.0288381595164537	B	-0.0297149140387773	B	-0.0292927827686071	B	-0.0316583774983882
1	99300001	99400000	B	-0.025030730292201	B	-0.0258242487907409	B	-0.0273045916110277	B	-0.0291760060936212	B	-0.0294033661484718	B	-0.029384521767497	B	-0.0319912657141685
1	99400001	99500000	B	-0.0272270068526268	B	-0.027883481234312	B	-0.0285219624638557	B	-0.0326453410089015	B	-0.0279287975281476	B	-0.0245182812213897	B	-0.0318185128271579
1	99500001	99600000	B	-0.02603748627007	B	-0.025660628452897	B	-0.0271697547286748	B	-0.0291368477046489	B	-0.0239096656441688	B	-0.0306948758661746	B	-0.0306219775229692
1	99600001	99700000	B	-0.0248942170292139	B	-0.0227372776716947	B	-0.0267604794353246	B	-0.0292375218123197	B	-0.0230467990040779	B	-0.0253044497221708	B	-0.0287983752787113
1	99700001	99800000	B	-0.0213385242968797	B	-0.0154988337308168	B	-0.0248809158802032	B	-0.0259435027837753	B	-0.0215088240802288	B	-0.0251265820115804	B	-0.0271625686436891
1	99800001	99900000	B	-0.0253194328397512	B	-0.0185069665312767	B	-0.0228076986968517	B	-0.0249716602265834	B	-0.0237995516508817	B	-0.0299162287265062	B	-0.0290175974369049
1	99900001	100000000	B	-0.0244036708027124	B	-0.0173070952296257	B	-0.025043586269021	B	-0.0289292261004447	B	-0.02072942443192	B	-0.0284373238682746	B	-0.0289628487080335
1	100000001	100100000	B	-0.025413965806365	B	-0.0130671365186572	B	-0.0248368512839078	B	-0.0259764790534973	B	-0.0239726416766643	B	-0.0306691545993089	B	-0.0301906093955039
1	100100001	100200000	B	-0.0254019908607006	B	-0.0198782309889793	B	-0.0238107405602931	B	-0.0294342935085296	B	-0.024605194106698	B	-0.0301316827535629	B	-0.0299358088523149
1	100200001	100300000	B	-0.0206308458000421	B	-0.0180400200188159	B	-0.0227573607116937	B	-0.0211092755198478	B	-0.0247343834489583	B	-0.0308649372309446	B	-0.0302660334855318
1	100300001	100400000	B	-0.0234593208879232	B	-0.0205000676214694	B	-0.0227849353104829	B	-0.0257848724722862	B	-0.0243914537131786	B	-0.0295772235840559	B	-0.0307481866329908
1	100400001	100500000	B	-0.0253561828285455	B	-0.0230658166110515	B	-0.0247786585241556	B	-0.030385959893465	B	-0.0253457520157098	B	-0.0285903438925743	B	-0.0314518734812736
1	100500001	100600000	B	-0.022682137787342	B	-0.0201369207352399	B	-0.0256342589855194	B	-0.0282058082520961	B	-0.0245154220610857	B	-0.0222892798483371	B	-0.0324639752507209
1	100600001	100700000	B	-0.0244773123413324	B	-0.0216538608074188	B	-0.0262495502829551	B	-0.0277907084673643	B	-0.0263045113533735	B	-0.0200263001024723	B	-0.0327250100672245
1	100700001	100800000	B	-0.0218230430036783	B	-0.0195146352052688	B	-0.0248890705406665	B	-0.0270167011767625	B	-0.0253774877637624	B	-0.0219893362373113	B	-0.0320718958973884
1	100800001	100900000	B	-0.0232086647301912	B	-0.0194415021687746	B	-0.0261423103511333	B	-0.0299202650785446	B	-0.0246445257216691	B	-0.019464086741209	B	-0.0322921723127365
1	100900001	101000000	B	-0.0214375630021095	B	-0.0177953913807868	B	-0.0249869637191295	B	-0.02672566100955	B	-0.0252903047949075	B	-0.0269309114664793	B	-0.033129833638668
1	101000001	101100000	B	-0.0232519377022981	B	-0.0200677849352359	B	-0.0272264387458562	B	-0.0286212414503097	B	-0.0295333378016948	B	-0.0305121950805187	B	-0.0336586311459541
1	101100001	101200000	B	-0.0226430222392082	B	-0.0213299710303545	B	-0.0265873149037361	B	-0.0297553390264511	B	-0.0281440261751413	B	-0.0296404156833887	B	-0.0338096134364604
1	101200001	101300000	B	-0.0244672317057847	B	-0.0208067335188388	B	-0.0273712687194347	B	-0.0288184061646461	B	-0.027834104374051	B	-0.0286975596100091	B	-0.033570971339941
1	101300001	101400000	B	-0.0211452860385179	B	-0.0196902118623256	B	-0.0253170505166053	B	-0.0277717467397451	B	-0.0284089930355548	B	-0.0273132715374231	B	-0.0337569788098335
1	101400001	101500000	B	-0.0240805428475141	B	-0.0217903349548578	B	-0.0286601576954126	B	-0.0293995048850774	B	-0.0280853379517793	B	-0.0267619639635086	B	-0.0334608927369117
1	101500001	101600000	B	-0.024498788639903	B	-0.0221112258732318	B	-0.028722696006298	B	-0.031143395230174	B	-0.0240515042096376	B	-0.0253608394414186	B	-0.0325787514448165
1	101600001	101700000	B	-0.0231005009263753	B	-0.020210912451148	B	-0.0275484379380941	B	-0.0267034564167261	B	-0.0237381011247634	B	-0.0168615859001874	B	-0.0326882600784301
1	101700001	101800000	B	-0.0228970479220151	B	-0.0183862540870904	B	-0.0261708367615938	B	-0.0301989987492561	B	-0.0234346911311149	B	-0.0025749308988451	B	-0.031988251954317
1	101800001	101900000	B	-0.0224276334047317	B	-0.0188512466847896	B	-0.0290541090071201	B	-0.029536148533225	B	-0.0273756831884384	B	-0.0072393408045172	B	-0.0332322977483272
1	101900001	102000000	B	-0.0230508893728256	B	-0.0173579603433609	B	-0.0290198344737291	B	-0.0295823011547327	B	-0.0276813693344593	B	-0.0085764890536665	B	-0.0335999689996242
1	102000001	102100000	B	-0.0231453813612461	B	-0.0155682824552059	B	-0.0275586824864149	B	-0.0299595464020967	B	-0.0281172692775726	B	-0.0183283891528844	B	-0.0333370268344879
1	102100001	102200000	B	-0.0247300844639539	B	-0.0096644489094614	B	-0.02770103700459	B	-0.0294772256165742	B	-0.0273873880505561	B	-0.0185934696346521	B	-0.0332221537828445
1	102200001	102300000	B	-0.0233577787876129	B	-0.0137991067022085	B	-0.027689890936017	B	-0.0279863737523555	B	-0.0287123043090105	B	-0.0186383258551359	B	-0.0330095887184143
1	102300001	102400000	B	-0.0244503486901521	B	-0.0156354252249002	B	-0.0285582765936851	B	-0.0303325951099395	B	-0.0272019319236278	B	-0.0213556624948978	B	-0.0325645357370376
1	102400001	102500000	B	-0.0247316248714923	B	-0.0191011540591716	B	-0.0312210526317358	B	-0.0314706861972808	B	-0.0293535143136978	B	-0.0294369254261255	B	-0.0329444073140621
1	102500001	102600000	B	-0.025729576125741	B	-0.0189880430698394	B	-0.0288229193538427	B	-0.0303778816014528	B	-0.0306891873478889	B	-0.0301188640296459	B	-0.0324940271675586
1	102600001	102700000	B	-0.028151512145996	B	-0.0164227187633514	B	-0.0299044754356145	B	-0.0332932882010936	B	-0.0305639673024415	B	-0.0297635532915592	B	-0.0328871980309486
1	102700001	102800000	B	-0.0259208437055349	B	-0.0185704212635755	B	-0.03030526638031	B	-0.0324509851634502	B	-0.0304985996335744	B	-0.0303659196943044	B	-0.0327429175376892
1	102800001	102900000	B	-0.0271194539964199	B	-0.0162961464375257	B	-0.030669841915369	B	-0.0325825847685337	B	-0.0304216686636209	B	-0.0287903789430856	B	-0.0326084494590759
1	102900001	103000000	B	-0.025034187361598	B	-0.0171382799744606	B	-0.0283562205731868	B	-0.0309371873736381	B	-0.028870528563857	B	-0.0287472326308488	B	-0.0324457138776779
1	103000001	103100000	B	-0.0256141554564237	B	-0.0182082187384367	B	-0.0293643549084663	B	-0.0308466218411922	B	-0.0290743485093116	B	-0.0263673663139343	B	-0.0324224196374416
1	103100001	103200000	B	-0.0253467988222837	B	-0.0185894630849361	B	-0.0284822545945644	B	-0.030886948108673	B	-0.0291045326739549	B	-0.0280711185187101	B	-0.0323950387537479
1	103200001	103300000	B	-0.0259895864874124	B	-0.0152840027585625	B	-0.0296205300837755	B	-0.0295436549931764	B	-0.030148571357131	B	-0.0308328922837972	B	-0.0320981666445732
1	103300001	103400000	B	-0.0271932985633611	B	-0.0180092714726924	B	-0.0301298126578331	B	-0.0327044464647769	B	-0.0300522577017545	B	-0.0294563341885805	B	-0.0320613346993923
1	103400001	103500000	B	-0.0280548147857189	B	-0.0187478084117174	B	-0.0302704479545354	B	-0.0320744961500167	B	-0.0300608370453119	B	-0.0256154779344797	B	-0.0317985117435455
1	103500001	103600000	B	-0.0259169209748506	B	-0.0177452340722084	B	-0.0291554909199476	B	-0.0307150930166244	B	-0.0288164634257555	B	-0.0263738464564085	B	-0.0306332800537347
1	103600001	103700000	B	-0.0260477606207132	B	-0.0142827946692705	B	-0.0301971659064292	B	-0.0318760238587856	B	-0.0263656117022037	B	-0.0297612678259611	B	-0.0283945444971323
1	103700001	103800000	B	-0.019385315477848	B	-0.0075488155707716	B	-0.0274392552673816	B	-0.0296195000410079	B	-0.0204047467559576	B	-0.0223912019282579	B	-0.0214265640825033
1	103800001	103900000	B	-0.0260060336440801	B	-0.0198708623647689	B	-0.0301662571728229	B	-0.0317192412912845	B	-0.0242445822805166	B	-0.0273483451455831	B	-0.0253004413098096
1	103900001	104000000	B	-0.029673857614398	B	-0.0298533514142036	B	-0.0334800146520137	B	-0.034741036593914	B	-0.0289510861039161	B	-0.029909374192357	B	-0.0301172006875276
1	104000001	104100000	B	-0.0310483928769826	B	-0.0327528044581413	B	-0.0335942320525646	B	-0.0353618636727333	B	-0.0273825898766517	B	-0.0324242673814296	B	-0.0311162453144788
1	104100001	104200000	B	-0.0282088313251733	B	-0.0309117212891578	B	-0.0314717479050159	B	-0.0350389368832111	B	-0.0295662563294172	B	-0.0327737815678119	B	-0.0309235006570816
1	104200001	104300000	B	-0.0278882440179586	B	-0.0302693173289299	B	-0.0312655009329319	B	-0.0309555307030677	B	-0.0279529299587011	B	-0.0322223715484142	B	-0.0296338237822055
1	104300001	104400000	B	-0.030416889116168	B	-0.0328891053795814	B	-0.0324830412864685	B	-0.0338003598153591	B	-0.0277638342231512	B	-0.0340857878327369	B	-0.0288159977644681
1	104400001	104500000	B	-0.0307284854352474	B	-0.0305945016443729	B	-0.0327555611729621	B	-0.0338580496609211	B	-0.0263180788606405	B	-0.0331421419978141	B	-0.0272182319313287
1	104500001	104600000	B	-0.0298683475703001	B	-0.0301192123442888	B	-0.0307601280510425	B	-0.034067016094923	B	-0.0188525114208459	B	-0.0328826010227203	B	-0.0212542247027158
1	104600001	104700000	B	-0.027015846222639	B	-0.0254098400473594	B	-0.0287685245275497	B	-0.0335626304149627	B	-0.0135201644152402	B	-0.0320428535342216	B	-0.0180819481611251
1	104700001	104800000	B	-0.0268546100705862	B	-0.0267229750752449	B	-0.0249863807111978	B	-0.0285411719232797	B	-0.0057379221543669	B	-0.0279655810445547	B	-0.0131903141736984
1	104800001	104900000	B	-0.0278136823326349	B	-0.0246097650378942	B	-0.0258968621492385	B	-0.0281380973756313	B	-0.0071272458881139	B	-0.0278824921697378	B	-0.0141326412558555
1	104900001	105000000	B	-0.0177408829331398	B	-0.0153505261987447	B	-0.0212351493537426	B	-0.0240525230765342	B	-0.0099329249933362	B	-0.0205567516386508	B	-0.0135234799236059
1	105000001	105100000	B	-0.0095147723332047	B	-0.0049816169776022	B	-0.0169921815395355	B	-0.0220859181135892	B	-0.0080820508301258	B	-0.0059512131847441	B	-0.0114029087126255
1	105100001	105200000	A	0.0006142317433841	A	0.0077441185712814	B	-0.0175496432930231	B	-0.0233429055660963	B	-0.0088173206895589	B	-0.0191824771463871	B	-0.010135012678802
1	105200001	105300000	A	0.0009392006322741	A	0.001966529758647	B	-0.0172130521386861	B	-0.0243527889251709	B	-0.0050888014957308	B	-0.0196266267448663	B	-0.0070044696331024
1	105300001	105400000	B	-0.0030454567167907	B	-0.0021639307960867	B	-0.0129403136670589	B	-0.0200462322682142	B	-0.0014201825251802	B	-0.0081102382391691	B	-0.0056844474747776
1	105400001	105500000	B	-0.0052322358824312	B	-0.0107185104861855	B	-0.0167657658457756	B	-0.0233931615948677	B	-0.0079545527696609	B	-0.0026431055739521	B	-0.0121764866635203
1	105500001	105600000	B	-0.001786739914678	B	-0.0065503837540745	B	-0.015480431728065	B	-0.0210431478917598	B	-0.0103033585473895	A	0.0089550334960222	B	-0.014307172037661
1	105600001	105700000	A	0.0013607954606413	B	-0.0039899027906358	B	-0.0040449262596666	B	-0.007652421016246	A	0.0007006814121268	A	0.0238954909145832	B	-0.0073598092421889
1	105700001	105800000	A	0.0059248255565762	B	-0.0125200944021344	A	0.0039399904198944	B	-0.005012774374336	A	0.0060503557324409	A	0.0296144038438797	B	-0.0042541855946183
1	105800001	105900000	A	0.0004151859029661	B	-0.0219057891517877	A	0.0067008044570684	B	-0.0064939484000205	A	0.0017791679129004	A	0.0222494080662727	B	-0.0098789604380726
1	105900001	106000000	A	0.0009244698449037	B	-0.0190708748996257	A	0.0093587972223758	B	-0.0023457552306354	A	0.0092557780444622	A	0.023260286077857	B	-0.0063472678884863
1	106000001	106100000	B	-0.0014213224640116	B	-0.0169221460819244	A	0.0098480358719825	B	-0.0024080250877887	A	0.0128478910773992	A	0.0239116847515106	B	-0.003499194048345
1	106100001	106200000	B	-0.0006400413694791	B	-0.0128127038478851	A	0.0098935738205909	A	0.0008822955423966	A	0.0199481435120105	A	0.0200440622866153	A	0.0043005915358662
1	106200001	106300000	B	-0.0025798568967729	B	-0.0049907667562365	A	0.0061061573214828	B	-0.0034871569368988	A	0.0186331756412982	A	0.0148655157536268	A	0.0043115448206663
1	106300001	106400000	B	-0.0022953110747039	B	-0.0104696629568934	A	0.0051170061342418	B	-0.0019720965065062	A	0.0128877777606248	A	0.0092299645766615	B	-0.002805289812386
1	106400001	106500000	A	0.0027740348596125	B	-0.0161199271678924	A	0.0050423056818544	B	-0.0070159127935767	A	0.0011714806314557	B	-0.0072914734482765	B	-0.0133999790996313
1	106500001	106600000	A	0.0096527766436338	A	0.0022553934250026	A	0.011292889714241	A	0.0046159531921148	A	0.0103671085089445	B	-0.0054669980891048	B	-0.0029878176283091
1	106600001	106700000	A	0.0122342426329851	A	0.0118802301585674	A	0.0151051981374621	A	0.0050917943008244	A	0.0119320219382643	B	-0.0065895812585949	B	-0.0003632279403973
1	106700001	106800000	A	0.0069921580143272	A	0.0040992880240082	A	0.010869525372982	A	0.0091727813705801	A	0.0134962480515241	A	0.0234399586915969	B	-0.0020309882238507
1	106800001	106900000	B	-0.0192674063146114	B	-0.0272646322846412	B	-0.0203138589859008	B	-0.0277441963553428	B	-0.0257945694029331	B	-0.0094578890129923	B	-0.0307549647986888
1	106900001	107000000	B	-0.033831849694252	B	-0.0322944186627864	B	-0.0331424698233604	B	-0.0363763757050037	B	-0.0297076161950826	B	-0.0267308484762907	B	-0.0322988405823707
1	107000001	107100000	B	-0.0347222760319709	B	-0.0352379567921161	B	-0.0348100289702415	B	-0.038208931684494	B	-0.0293623879551887	B	-0.0290202870965003	B	-0.0302278958261013
1	107100001	107200000	B	-0.029787503182888	B	-0.0326805263757705	B	-0.0317439101636409	B	-0.0339835844933986	B	-0.0281935390084981	B	-0.028436729684472	B	-0.0285529885441064
1	107200001	107300000	B	-0.0284889601171016	B	-0.0316233858466148	B	-0.0307259578257799	B	-0.0311254113912582	B	-0.0280434601008892	B	-0.0283046681433916	B	-0.028515862300992
1	107300001	107400000	B	-0.0329629033803939	B	-0.0325041785836219	B	-0.0310471504926681	B	-0.0340429432690143	B	-0.0295509099960327	B	-0.0320852100849151	B	-0.030229153111577
1	107400001	107500000	B	-0.0318641364574432	B	-0.0327772162854671	B	-0.0304360594600439	B	-0.0322507433593273	B	-0.0273232739418745	B	-0.0303318314254283	B	-0.0299031604081392
1	107500001	107600000	B	-0.027382792904973	B	-0.0275932140648365	B	-0.0264937877655029	B	-0.0288025792688131	B	-0.0198764745146036	B	-0.025277329608798	B	-0.0231265388429164
1	107600001	107700000	B	-0.021520972251892	B	-0.0202864930033683	B	-0.0219466723501682	B	-0.0249954983592033	B	-0.0144891189411282	B	-0.0227448716759681	B	-0.0138385156169533
1	107700001	107800000	B	-0.0228381883352994	B	-0.0238296389579772	B	-0.024258816614747	B	-0.0252922717481851	B	-0.0122077828273177	B	-0.0271900035440921	B	-0.0080790845677256
1	107800001	107900000	B	-0.0256841145455837	B	-0.026418725028634	B	-0.0247849617153406	B	-0.0271984953433275	B	-0.0109135704115033	B	-0.0250420048832893	B	-0.0078180776908993
1	107900001	108000000	B	-0.0233781803399324	B	-0.0227235108613967	B	-0.0230435207486152	B	-0.0256739147007465	B	-0.0016769769135862	B	-0.0212473887950181	B	-0.003998814150691
1	108000001	108100000	B	-0.0256646964699029	B	-0.0274421237409114	B	-0.0279725976288318	B	-0.0286389011889696	B	-0.0132357543334364	B	-0.0231216177344322	B	-0.0131267206743359
1	108100001	108200000	B	-0.0272696632891893	B	-0.0289442557841539	B	-0.026408290490508	B	-0.0291665010154247	B	-0.0184908397495746	B	-0.0269760619848966	B	-0.0137092359364032
1	108200001	108300000	B	-0.0261716581881046	B	-0.0273698754608631	B	-0.0265530571341514	B	-0.0280319117009639	B	-0.0188951287418603	B	-0.0279662180691957	B	-0.0149590345099568
1	108300001	108400000	B	-0.0258123259991407	B	-0.0286084413528442	B	-0.0284652113914489	B	-0.0285851061344146	B	-0.0203286875039339	B	-0.0267405863851308	B	-0.0178870260715484
1	108400001	108500000	B	-0.0272089652717113	B	-0.0281510278582572	B	-0.0276746246963739	B	-0.0288134738802909	B	-0.0230021327733993	B	-0.0276351980865001	B	-0.020598916336894
1	108500001	108600000	B	-0.0271686129271984	B	-0.0305796433240175	B	-0.0268333535641431	B	-0.0297763235867023	B	-0.0250070076435804	B	-0.0239081718027591	B	-0.0223654191941022
1	108600001	108700000	B	-0.02759232185781	B	-0.0303142759948968	B	-0.0287385880947113	B	-0.0296713430434465	B	-0.0275335349142551	B	-0.0293361935764551	B	-0.0262144394218921
1	108700001	108800000	B	-0.0261895079165697	B	-0.027364794164896	B	-0.0277118068188428	B	-0.0286642201244831	B	-0.027580389752984	B	-0.0303191114217042	B	-0.0264403466135263
1	108800001	108900000	B	-0.0229230634868145	B	-0.0260171145200729	B	-0.0279484931379556	B	-0.0307384599000215	B	-0.0283731147646904	B	-0.0265537071973085	B	-0.026873018592596
1	108900001	109000000	B	-0.0274140145629644	B	-0.029108703136444	B	-0.0283941980451345	B	-0.029060460627079	B	-0.0295242741703987	B	-0.0276787355542182	B	-0.0284849964082241
1	109000001	109100000	B	-0.028536444529891	B	-0.027159372344613	B	-0.0296780858188867	B	-0.0294104237109422	B	-0.0293607730418443	B	-0.0265946686267852	B	-0.0287624727934598
1	109100001	109200000	B	-0.0274782683700323	B	-0.0284269452095031	B	-0.0291528925299644	B	-0.0306007601320743	B	-0.0289322528988122	B	-0.0293305478990077	B	-0.0271924398839473
1	109200001	109300000	B	-0.0277777276933193	B	-0.0289350785315036	B	-0.0294541753828525	B	-0.0304105076938867	B	-0.0297712162137031	B	-0.0298279616981744	B	-0.0281977467238903
1	109300001	109400000	B	-0.0277348384261131	B	-0.0286943465471267	B	-0.029801107943058	B	-0.0300031602382659	B	-0.0298633277416229	B	-0.0228200517594814	B	-0.0294585134834051
1	109400001	109500000	B	-0.0274886488914489	B	-0.0278486460447311	B	-0.0286811161786317	B	-0.0288853626698255	B	-0.0289923790842294	B	-0.0246572885662317	B	-0.0274115148931741
1	109500001	109600000	B	-0.026906993240118	B	-0.0292091183364391	B	-0.0286380108445882	B	-0.0316417329013347	B	-0.0287932846695184	B	-0.0282623097300529	B	-0.0253592785447835
1	109600001	109700000	B	-0.0276494715362787	B	-0.0274033416062593	B	-0.0287075005471706	B	-0.0296523422002792	B	-0.0281335804611444	B	-0.0305630303919315	B	-0.0266248788684606
1	109700001	109800000	B	-0.0249776523560285	B	-0.0265783164650201	B	-0.0279457364231348	B	-0.0306300818920135	B	-0.0246659945696592	B	-0.0232218615710735	B	-0.022011550143361
1	109800001	109900000	B	-0.0243637468665838	B	-0.025078922510147	B	-0.0277595538645982	B	-0.0275795776396989	B	-0.0259877704083919	B	-0.0270514357835054	B	-0.0241150874644517
1	109900001	110000000	B	-0.0255001261830329	B	-0.0261656697839498	B	-0.0259158536791801	B	-0.0279115252196788	B	-0.0161995235830545	B	-0.0230638105422258	B	-0.0156453698873519
1	110000001	110100000	B	-0.0240264311432838	B	-0.0243432931602001	B	-0.0260013211518526	B	-0.0266678873449563	B	-0.0195360891520977	B	-0.0274134669452905	B	-0.0202004835009574
1	110100001	110200000	B	-0.026298202574253	B	-0.0233676899224519	B	-0.0278250053524971	B	-0.0296580977737903	B	-0.0207935739308595	B	-0.0295560117810964	B	-0.024135148152709
1	110200001	110300000	B	-0.0259827263653278	B	-0.0270607080310583	B	-0.0272897668182849	B	-0.0294126458466053	B	-0.026290962472558	B	-0.0300274863839149	B	-0.0278754215687513
1	110300001	110400000	B	-0.0259559676051139	B	-0.0289770420640707	B	-0.0270698405802249	B	-0.029968399554491	B	-0.0259103793650865	B	-0.0271626021713018	B	-0.0276792589575052
1	110400001	110500000	B	-0.0266891736537218	B	-0.0275856256484985	B	-0.027514312416315	B	-0.0268402621150016	B	-0.021872928366065	B	-0.0262965895235538	B	-0.027057196944952
1	110500001	110600000	B	-0.0275428872555494	B	-0.0284732561558485	B	-0.0279952697455883	B	-0.0310352332890033	B	-0.0278739146888256	B	-0.029877845197916	B	-0.0300756692886352
1	110600001	110700000	B	-0.0260353125631809	B	-0.0290672443807125	B	-0.0286381095647811	B	-0.0298780594021081	B	-0.0286658052355051	B	-0.0275342296808958	B	-0.030644217506051
1	110700001	110800000	B	-0.0305173173546791	B	-0.0313921272754669	B	-0.0289479158818721	B	-0.0311695598065853	B	-0.0292224362492561	B	-0.0196400694549083	B	-0.0309931375086307
1	110800001	110900000	B	-0.0276093445718288	B	-0.0300927590578794	B	-0.0292014982551336	B	-0.029367372393608	B	-0.0270989499986171	B	-0.0199365988373756	B	-0.0296340156346559
1	110900001	111000000	B	-0.0250938888639211	B	-0.0287753622978925	B	-0.0257618594914674	B	-0.0277652833610773	B	-0.022083519026637	B	-0.0193025935441255	B	-0.026859825477004
1	111000001	111100000	B	-0.0257733296602964	B	-0.0294644087553024	B	-0.0277011897414922	B	-0.0302626974880695	B	-0.0268971621990203	B	-0.0271473303437232	B	-0.0293589811772108
1	111100001	111200000	B	-0.0261770784854888	B	-0.0281202029436826	B	-0.0288194715976715	B	-0.0291887167841196	B	-0.0280330497771501	B	-0.0285683423280715	B	-0.0291249137371778
1	111200001	111300000	B	-0.0227471068501472	B	-0.0210793372243642	B	-0.0241744071245193	B	-0.0238097310066223	B	-0.0226841550320386	B	-0.0251492634415626	B	-0.0247263275086879
1	111300001	111400000	B	-0.0265146493911743	B	-0.0244108121842145	B	-0.0269388612359762	B	-0.0303262807428836	B	-0.0273876916617155	B	-0.0297528617084026	B	-0.0297602247446775
1	111400001	111500000	B	-0.0267802067101001	B	-0.0274290852248668	B	-0.0292294658720493	B	-0.0319921374320983	B	-0.028499212116003	B	-0.0297676660120487	B	-0.0302422065287828
1	111500001	111600000	B	-0.0274741426110267	B	-0.0267006419599056	B	-0.0288169328123331	B	-0.0310619622468948	B	-0.0276708733290433	B	-0.0288864504545927	B	-0.0296320058405399
1	111600001	111700000	B	-0.0226086862385272	B	-0.0233186967670917	B	-0.0273735355585813	B	-0.0289636254310607	B	-0.0236717909574508	B	-0.0216260030865669	B	-0.0276779029518365
1	111700001	111800000	B	-0.0232026800513267	B	-0.0254591275006532	B	-0.0274698175489902	B	-0.0316262580454349	B	-0.0246426593512296	B	-0.0229984540492296	B	-0.0306006595492362
1	111800001	111900000	B	-0.0250854697078466	B	-0.0234232172369956	B	-0.0274486262351274	B	-0.0292246248573064	B	-0.0196794439107179	B	-0.0196399707347154	B	-0.0272285565733909
1	111900001	112000000	B	-0.0264721922576427	B	-0.0266505572944879	B	-0.0286098476499319	B	-0.031176671385765	B	-0.026221390813589	B	-0.0281483922153711	B	-0.0302724353969097
1	112000001	112100000	B	-0.029486384242773	B	-0.0294555183500051	B	-0.0314693115651607	B	-0.0343717969954013	B	-0.0279788020998239	B	-0.029884960502386	B	-0.030503986403346
1	112100001	112200000	B	-0.0293828081339597	B	-0.0299566630274057	B	-0.0322874523699283	B	-0.0351016670465469	B	-0.0292500536888837	B	-0.0292850695550441	B	-0.0324445366859436
1	112200001	112300000	B	-0.0271629299968481	B	-0.0276384837925434	B	-0.0305710490792989	B	-0.0327095128595829	B	-0.029291033744812	B	-0.0248406883329153	B	-0.03240617364645
1	112300001	112400000	B	-0.026449054479599	B	-0.0270223934203386	B	-0.0301211029291152	B	-0.033429529517889	B	-0.0270739011466503	B	-0.0282310415059328	B	-0.03029715269804
1	112400001	112500000	B	-0.0247598253190517	B	-0.024105442687869	B	-0.0267988089472055	B	-0.0300237722694873	B	-0.0237843059003353	B	-0.0253550335764884	B	-0.0299115628004074
1	112500001	112600000	B	-0.0243319999426603	B	-0.0220460034906864	B	-0.0278750583529472	B	-0.0288917422294616	B	-0.0268710106611251	B	-0.0288799181580543	B	-0.0299468990415334
1	112600001	112700000	B	-0.0225689504295587	B	-0.0185890514403581	B	-0.0265123751014471	B	-0.0277064647525548	B	-0.0252354238182306	B	-0.0267650000751018	B	-0.0292194802314043
1	112700001	112800000	B	-0.0211084559559822	B	-0.0171593967825174	B	-0.0258525088429451	B	-0.0278729330748319	B	-0.0251840893179178	B	-0.025095472112298	B	-0.0295318625867366
1	112800001	112900000	B	-0.0244069658219814	B	-0.021331513300538	B	-0.0278771352022886	B	-0.0283933468163013	B	-0.0276969373226165	B	-0.0252207219600677	B	-0.0304300021380186
1	112900001	113000000	B	-0.0260407421737909	B	-0.02461439371109	B	-0.0287365186959505	B	-0.0299514569342136	B	-0.027252135798335	B	-0.0299631562083959	B	-0.0311252959072589
1	113000001	113100000	B	-0.0252295844256877	B	-0.0257617775350809	B	-0.0281108785420656	B	-0.0293828640133142	B	-0.0286634489893913	B	-0.0312685817480087	B	-0.0309886280447244
1	113100001	113200000	B	-0.0238439179956913	B	-0.0237222965806722	B	-0.0270211696624755	B	-0.0288890767842531	B	-0.0279461145401	B	-0.031300738453865	B	-0.0315148197114467
1	113200001	113300000	B	-0.0258004870265722	B	-0.0256958194077014	B	-0.0272275675088167	B	-0.0287016984075307	B	-0.0266340784728527	B	-0.0300514418631792	B	-0.0319378860294818
1	113300001	113400000	B	-0.0232213363051414	B	-0.0221203006803989	B	-0.0253268033266067	B	-0.0262407567352056	B	-0.0260512195527553	B	-0.0289167407900095	B	-0.0317842438817024
1	113400001	113500000	B	-0.024733867496252	B	-0.0213251207023859	B	-0.0263807754963636	B	-0.0275096502155065	B	-0.0259747114032506	B	-0.030389642342925	B	-0.0321745909750461
1	113500001	113600000	B	-0.0249169413000345	B	-0.0183760821819305	B	-0.0262756627053022	B	-0.0288936290889978	B	-0.0272737145423889	B	-0.0282558463513851	B	-0.0322987176477909
1	113600001	113700000	B	-0.0218369662761688	B	-0.0186991952359676	B	-0.0249067861586809	B	-0.0256279744207859	B	-0.0267594885081052	B	-0.0276418402791023	B	-0.03208002820611
1	113700001	113800000	B	-0.0208511985838413	B	-0.0187604743987321	B	-0.0253357961773872	B	-0.0267393514513969	B	-0.0275959391146898	B	-0.0280828773975372	B	-0.0323932096362113
1	113800001	113900000	B	-0.0233708322048187	B	-0.0238184351474046	B	-0.0262091886252164	B	-0.0309635289013385	B	-0.0265168156474828	B	-0.0260047037154436	B	-0.0325157828629016
1	113900001	114000000	B	-0.0213798396289348	B	-0.0190788079053163	B	-0.0249809864908456	B	-0.0275568142533302	B	-0.0221722498536109	A	0.0008944583823904	B	-0.0318821035325527
1	114000001	114100000	B	-0.021919010207057	B	-0.0195862129330635	B	-0.0242716111242771	B	-0.0280246268957853	B	-0.0236638840287923	B	-0.0191016886383295	B	-0.0323703251779079
1	114100001	114200000	B	-0.0165985058993101	B	-0.0145529508590698	B	-0.0248775593936443	B	-0.026053624227643	B	-0.0257201958447694	B	-0.0187053401023149	B	-0.0325739495456218
1	114200001	114300000	B	-0.0220850743353366	B	-0.0134258633479475	B	-0.0253904275596141	B	-0.0288816336542367	B	-0.027127681300044	B	-0.0262210257351398	B	-0.0328575298190116
1	114300001	114400000	B	-0.024318104609847	B	-0.019367916509509	B	-0.0281671434640884	B	-0.0300802681595087	B	-0.0264188665896654	B	-0.0311674550175666	B	-0.0328797660768032
1	114400001	114500000	B	-0.0218760389834642	B	-0.0178800504654645	B	-0.0279290415346622	B	-0.029961060732603	B	-0.0253886841237545	B	-0.0310281496495008	B	-0.0324565470218658
1	114500001	114600000	B	-0.021406115964055	B	-0.0180795975029468	B	-0.0266668368130922	B	-0.0279812943190336	B	-0.0221273470669984	B	-0.0252878256142139	B	-0.0318086668848991
1	114600001	114700000	B	-0.0210192631930112	B	-0.0179624855518341	B	-0.0261009447276592	B	-0.0283509213477373	B	-0.0241386871784925	B	-0.0236293021589517	B	-0.0318801365792751
1	114700001	114800000	B	-0.0186059158295393	B	-0.0152322463691234	B	-0.026270892471075	B	-0.0291845686733722	B	-0.0265343822538852	B	-0.0258922930806875	B	-0.0330154933035373
1	114800001	114900000	B	-0.0200007390230894	B	-0.0180152785032987	B	-0.0270286537706851	B	-0.0289654321968555	B	-0.0265386849641799	B	-0.0231896322220563	B	-0.0327923111617565
1	114900001	115000000	B	-0.0241736471652984	B	-0.0191611517220735	B	-0.028068508952856	B	-0.0299143716692924	B	-0.0269079953432083	B	-0.0279446374624967	B	-0.0325429663062095
1	115000001	115100000	B	-0.0251479297876358	B	-0.0203368850052356	B	-0.0290171429514884	B	-0.0314751304686069	B	-0.0282709263265132	B	-0.0298564042896032	B	-0.0333766676485538
1	115100001	115200000	B	-0.0238344203680753	B	-0.0209153927862644	B	-0.0277992337942123	B	-0.0293211340904235	B	-0.0276020541787147	B	-0.0301870014518499	B	-0.0329688750207424
1	115200001	115300000	B	-0.0222037732601165	B	-0.0191025398671627	B	-0.0283507443964481	B	-0.0313560031354427	B	-0.0293213538825511	B	-0.0319169908761978	B	-0.033638522028923
1	115300001	115400000	B	-0.0212939660996198	B	-0.0185340959578752	B	-0.0280441027134656	B	-0.0306284874677658	B	-0.0285962503403425	B	-0.0296178869903087	B	-0.03353838250041
1	115400001	115500000	B	-0.0213594548404216	B	-0.0136298593133687	B	-0.0263714976608753	B	-0.0278845857828855	B	-0.0289509333670139	B	-0.0299181621521711	B	-0.0332053750753402
1	115500001	115600000	B	-0.0172242950648069	B	-0.0039190310053527	B	-0.026905570179224	B	-0.0282913316041231	B	-0.0281883552670478	B	-0.0297538917511701	B	-0.0327845700085163
1	115600001	115700000	B	-0.0206545945256948	B	-0.0122701944783329	B	-0.0268817413598299	B	-0.0304383970797061	B	-0.026564409956336	B	-0.0299344900995492	B	-0.0307919792830944
1	115700001	115800000	B	-0.0248720925301313	B	-0.0175368022173643	B	-0.0277493707835674	B	-0.0297262072563171	B	-0.021956605836749	B	-0.0294786095619201	B	-0.0256188455969095
1	115800001	115900000	B	-0.0261184480041265	B	-0.0162692349404096	B	-0.0243239533156156	B	-0.0277936421334743	B	-0.0200129020959138	B	-0.0278108641505241	B	-0.0242435280233621
1	115900001	116000000	B	-0.0275554507970809	B	-0.0192564502358436	B	-0.0266791619360446	B	-0.0272944271564483	B	-0.0182591490447521	B	-0.0307479854673147	B	-0.0231388360261917
1	116000001	116100000	B	-0.0276221390813589	B	-0.0162820275872945	B	-0.0260555446147918	B	-0.0269633755087852	B	-0.0183292105793952	B	-0.0304800346493721	B	-0.0221354942768812
1	116100001	116200000	B	-0.0269460510462522	B	-0.0164355691522359	B	-0.0247186701744794	B	-0.028045792132616	B	-0.0186679996550083	B	-0.028748020529747	B	-0.0200560614466667
1	116200001	116300000	B	-0.0263702310621738	B	-0.0191416852176189	B	-0.0268008261919021	B	-0.0276730470359325	B	-0.0170315131545066	B	-0.027054376900196	B	-0.020311975851655
1	116300001	116400000	B	-0.0228390954434871	B	-0.017897056415677	B	-0.0240655485540628	B	-0.025930356234312	B	-0.0122153433039784	B	-0.0255479272454977	B	-0.0201397016644477
1	116400001	116500000	B	-0.0227552074939012	B	-0.0204716380685567	B	-0.0237641055136919	B	-0.0265527982264757	B	-0.0194453466683626	B	-0.0282419621944427	B	-0.0264804493635892
1	116500001	116600000	B	-0.0298590883612632	B	-0.027783878147602	B	-0.0296427868306636	B	-0.0321639366447925	B	-0.0265467166900634	B	-0.0326518900692462	B	-0.0315470471978187
1	116600001	116700000	B	-0.0272434707731008	B	-0.0274094901978969	B	-0.0295559763908386	B	-0.0305021870881319	B	-0.0301968026906251	B	-0.0327217057347297	B	-0.0327854081988334
1	116700001	116800000	B	-0.0285159144550561	B	-0.0294933971017599	B	-0.026239538565278	B	-0.0279443264007568	B	-0.0310498494654893	B	-0.0319284126162529	B	-0.032723844051361
1	116800001	116900000	B	-0.0307190250605344	B	-0.0313985124230384	B	-0.0324900709092617	B	-0.0332160703837871	B	-0.0310592651367187	B	-0.0298291277140378	B	-0.0325651317834854
1	116900001	117000000	B	-0.0308252908289432	B	-0.0309312138706445	B	-0.0299352556467056	B	-0.033090092241764	B	-0.0313474014401435	B	-0.0295176543295383	B	-0.0327018611133098
1	117000001	117100000	B	-0.030023893341422	B	-0.0303552746772766	B	-0.0314892567694187	B	-0.0335707366466522	B	-0.0292586665600538	B	-0.0280932262539863	B	-0.0321188569068908
1	117100001	117200000	B	-0.0309964623302221	B	-0.0299271140247583	B	-0.030879221856594	B	-0.0331303030252456	B	-0.0291772373020648	B	-0.0273321457207202	B	-0.0320203267037868
1	117200001	117300000	B	-0.0306867733597755	B	-0.0296458471566438	B	-0.0299550835043191	B	-0.0314692184329032	B	-0.0278712511062622	B	-0.0172717105597257	B	-0.0319872573018074
1	117300001	117400000	B	-0.0317062623798847	B	-0.0310827437788248	B	-0.0309634339064359	B	-0.0335560329258441	B	-0.0288822185248136	B	-0.0234566293656826	B	-0.0316954553127288
1	117400001	117500000	B	-0.0270469971001148	B	-0.0284515842795372	B	-0.0290843956172466	B	-0.0297288261353969	B	-0.0272397566586732	B	-0.0102954618632793	B	-0.0298558492213487
1	117500001	117600000	B	-0.0309638008475303	B	-0.0303523503243923	B	-0.0305990148335695	B	-0.0315941832959651	B	-0.027127668261528	B	-0.0256422031670808	B	-0.02832917496562
1	117600001	117700000	B	-0.0272718220949172	B	-0.0303270816802978	B	-0.0304677616804838	B	-0.0324707739055156	B	-0.0280195232480764	B	-0.0252475142478942	B	-0.0274609122425317
1	117700001	117800000	B	-0.027740154415369	B	-0.0284494217485189	B	-0.0301471594721078	B	-0.0301967374980449	B	-0.0271879341453313	B	-0.0273363422602415	B	-0.0268815346062183
1	117800001	117900000	B	-0.0276684314012527	B	-0.0300015546381473	B	-0.0320801101624965	B	-0.0329258143901824	B	-0.026619154959917	B	-0.0264392811805009	B	-0.026092292740941
1	117900001	118000000	B	-0.0269388277083635	B	-0.0302139371633529	B	-0.0314539782702922	B	-0.0332119911909103	B	-0.0263464916497468	B	-0.0244760960340499	B	-0.0263587329536676
1	118000001	118100000	B	-0.0255272146314382	B	-0.0301407519727945	B	-0.0302374996244907	B	-0.0308270845562219	B	-0.0259908884763717	B	-0.0222514048218727	B	-0.0269679650664329
1	118100001	118200000	B	-0.0255747642368078	B	-0.0289804823696613	B	-0.0293655786663293	B	-0.031468242406845	B	-0.0271067079156637	B	-0.0234294831752777	B	-0.0279634911566972
1	118200001	118300000	B	-0.0306346733123064	B	-0.0331432297825813	B	-0.0289320554584264	B	-0.0310733914375305	B	-0.0270057674497365	B	-0.0160686057060956	B	-0.0284510236233472
1	118300001	118400000	A	0.0037384149618446	A	0.0005950828199274	A	0.0096739511936903	A	0.0094994865357875	A	0.0078828511759638	A	0.0317414663732051	B	-0.0049451920203864
1	118400001	118500000	A	0.0111079690977931	A	0.0084829935804009	A	0.0184027776122093	A	0.0192452035844326	A	0.0182842351496219	A	0.034833837300539	A	0.0034484739881008
1	118500001	118600000	A	0.0173540413379669	A	0.0163525436073541	A	0.0262809470295906	A	0.0268181152641773	A	0.0225072801113128	A	0.0360509976744651	A	0.0059004398062825
1	118600001	118700000	A	0.0216358695179224	A	0.0202488303184509	A	0.0295783374458551	A	0.0293438956141471	A	0.0221887603402137	A	0.0380055755376815	B	-0.0033858213573694
1	118700001	118800000	A	0.0208035241812467	A	0.0186582952737808	A	0.0306104440242052	A	0.0282139554619789	A	0.0200858153402805	A	0.0355897098779678	B	-0.0066751171834766
1	118800001	118900000	A	0.0292774774134159	A	0.0244068428874015	A	0.0350687578320503	A	0.0387777239084243	A	0.0281098689883947	A	0.0340516828000545	A	0.0090888692066073
1	118900001	119000000	A	0.0301067288964986	A	0.0276619009673595	A	0.0367159582674503	A	0.036714419722557	A	0.0318965502083301	A	0.0362587124109268	A	0.0162519998848438
1	119000001	119100000	A	0.0289005953818559	A	0.0268303528428077	A	0.0358314998447895	A	0.035305917263031	A	0.0307150278240442	A	0.0392241552472114	A	0.0091074891388416
1	119100001	119200000	A	0.0324505232274532	A	0.029486883431673	A	0.034876562654972	A	0.0312034059315919	A	0.0158213879913091	A	0.0372348502278327	B	-0.0096904300153255
1	119200001	119300000	A	0.0332496240735054	A	0.0297825001180171	A	0.0345382839441299	A	0.0307458471506834	A	0.0124384351074695	A	0.0368892587721347	B	-0.0111781116575002
1	119300001	119400000	A	0.0353742241859436	A	0.0312033388763666	A	0.0366024076938629	A	0.0325502529740333	A	0.0194846335798501	A	0.0395795330405235	B	-0.0014168730704113
1	119400001	119500000	A	0.0339584052562713	A	0.031658336520195	A	0.0360637009143829	A	0.0334977321326732	A	0.026361908763647	A	0.0399970486760139	A	0.0068211816251277
1	119500001	119600000	A	0.0322146192193031	A	0.0320482887327671	A	0.0369743071496486	A	0.0353593416512012	A	0.0301806312054395	A	0.0396275892853736	A	0.0074475011788308
1	119600001	119700000	A	0.0295856837183237	A	0.0340310931205749	A	0.03455251455307	A	0.0314571373164653	A	0.0298084150999784	A	0.0384603403508663	A	0.0060199508443474
1	119700001	119800000	A	0.0256199426949024	A	0.034141294658184	A	0.031369999051094	A	0.0279606450349092	A	0.0275376960635185	A	0.0359554179012775	A	0.0042373873293399
1	119800001	119900000	A	0.0301148947328329	A	0.0335583537817001	A	0.0333101525902748	A	0.0300053302198648	A	0.0292280614376068	A	0.0376231223344802	A	0.0056128045544028
1	119900001	120000000	A	0.0289661586284637	A	0.0293155666440725	A	0.0340828038752079	A	0.0292749609798192	A	0.0253616254776716	A	0.0371448025107383	B	-0.0026138436514884
1	120000001	120100000	A	0.0303284619003534	A	0.0290605500340461	A	0.0359411500394344	A	0.0355422981083393	A	0.0259919725358486	A	0.0389230474829673	B	-0.0019946200773119
1	120100001	120200000	A	0.0254511982202529	A	0.0199084281921386	A	0.0328738912940025	A	0.0316932424902915	A	0.0182708986103534	A	0.0366538874804973	B	-0.0023453233297914
1	120200001	120300000	A	0.0224978700280189	A	0.0128488559275865	A	0.0286146141588687	A	0.0223354306071996	A	0.0034904638305306	A	0.0338391438126564	B	-0.0140807600691914
1	120300001	120400000	A	0.0199064817279577	A	0.0020077000372111	A	0.0265951231122016	A	0.0205786898732185	B	-0.0040743011049926	A	0.0306791923940181	B	-0.0186977311968803
1	120400001	120500000	A	0.0170041415840387	B	-0.001812033355236	A	0.0268452540040016	A	0.018998846411705	B	-0.0065227304585278	A	0.022877249866724	B	-0.0219224505126476
1	120500001	120600000	A	0.0105102388188242	B	-0.0008315001032315	A	0.0199780166149139	A	0.0138271711766719	B	-0.0018210032721981	A	0.026547247543931	B	-0.0180543847382068
1	120600001	120700000	A	0.000800723908469	A	0.0012846773024648	A	0.0199475865811109	A	0.0134512968361377	A	0.0102539639919996	A	0.0265228208154439	B	-0.0035639486741274
1	120700001	120800000	B	-0.0048381802625954	B	-0.0070644826628267	A	0.0180356167256832	A	0.00799838360399	B	-0.0033227319363504	A	0.0199553538113832	B	-0.0096123525872826
1	120800001	120900000	B	-0.0068916440941393	B	-0.0104799848049879	A	0.0163807272911071	A	0.0043341307900846	B	-0.003143441164866	A	0.0099540306255221	B	-0.0067546907812356
1	120900001	121000000	B	-0.0045066955499351	B	-0.0021000853739678	A	0.0139795187860727	A	0.0046977801248431	A	0.0023443622048944	A	0.0109524251893162	B	-0.0066136317327618
1	121000001	121100000	B	-0.0017998905386775	B	-0.0027172844856977	A	0.0173159632831811	A	0.0089467437937855	A	0.0071809305809438	A	0.0183111429214477	B	-0.0041221752762794
1	121100001	121200000	B	-0.0035889942664653	B	-0.002383571350947	A	0.0181676745414733	A	0.0115093393251299	A	0.0069428924471139	A	0.0185617357492446	B	-0.0056692790240049
1	121200001	121300000	A	0.0007797222933731	A	0.0009559411555528	A	0.014554426074028	A	0.0049699712544679	B	-0.0044004437513649	A	0.014788769185543	B	-0.0087785702198743
1	121300001	121400000	A	0.0040576653555035	A	0.0086506977677345	A	0.0177663080394268	A	0.0102169970050454	A	0.0041496432386338	A	0.0207384433597326	B	-0.0018012498039752
1	121400001	121500000	A	0.001418084022589	A	0.0064484276808798	A	0.0137116471305489	A	0.0091771213337779	A	0.0050952900201082	A	0.0253323726356029	B	-0.0086738402023911
1	121500001	121600000	B	-0.0103791076689958	B	-0.0024830186739563	B	-4.5258e+10	B	-0.0020129503682255	B	-0.0075014857575297	A	0.0210064966231584	B	-0.0202133674174547
1	121600001	121700000	B	-0.0247714538127183	B	-0.0173397976905107	B	-0.0202969294041395	B	-0.0234364680945873	B	-0.0281845238059759	B	-0.0160078890621662	B	-0.0295666772872209
1	121700001	121800000	B	-0.0272853448987007	B	-0.0206251144409179	B	-0.0220399238169193	B	-0.0238368120044469	B	-0.0291906390339136	B	-0.0202790442854166	B	-0.0291723236441612
1	121800001	121900000	B	-0.0269326269626617	B	-0.0198929030448198	B	-0.0247238427400589	B	-0.0292932912707328	B	-0.0301106516271829	B	-0.0232851300388574	B	-0.0284787528216838
1	121900001	122000000	B	-0.0293472874909639	B	-0.020044008269906	B	-0.0267645083367824	B	-0.0300421994179487	B	-0.0304402280598878	B	-0.0289241075515747	B	-0.0274086631834507
1	122000001	122100000	B	-0.0258368831127882	B	-0.0145777408033609	B	-0.0255537945777177	B	-0.0270835440605878	B	-0.0299179852008819	B	-0.0289138536900281	B	-0.0266978237777948
1	122100001	122200000	B	-0.0296963471919298	B	-0.0163601692765951	B	-0.0271293502300977	B	-0.0307243522256612	B	-0.0315154194831848	B	-0.0305418130010366	B	-0.027406707406044
1	122200001	122300000	B	-0.0285768620669841	B	-0.0140809966251254	B	-0.0252888090908527	B	-0.0284768734127283	B	-0.0312375631183385	B	-0.0302701164036989	B	-0.0283197164535522
1	122300001	122400000	B	-0.0263847466558218	B	-0.0133121712133288	B	-0.0217893812805414	B	-0.025928858667612	B	-0.0301889963448047	B	-0.0260336492210626	B	-0.0299630276858806
1	122400001	122500000	B	-0.0281490553170442	B	-0.0092751495540142	B	-0.0234776716679334	B	-0.026455795392394	B	-0.0306411050260067	B	-0.0223498065024614	B	-0.0310519859194755
1	122500001	122600000	B	-0.0289212167263031	B	-0.0169085524976253	B	-0.0236351825296878	B	-0.0256870687007904	B	-0.0300864595919847	B	-0.0215992592275142	B	-0.0318526960909366
1	122600001	122700000	B	-0.0280260127037763	B	-0.0201759245246648	B	-0.0247834250330925	B	-0.0270792432129383	B	-0.0309924483299255	B	-0.0122126191854476	B	-0.0317052267491817
1	122700001	122800000	B	-0.0275119990110397	B	-0.0210292171686887	B	-0.0268836263567209	B	-0.0296198185533285	B	-0.0316218025982379	B	-0.0224623624235391	B	-0.0314969085156917
1	122800001	122900000	B	-0.028137108311057	B	-0.0202048290520906	B	-0.027076069265604	B	-0.0290138702839612	B	-0.0303230267018079	B	-0.0244129430502653	B	-0.0317933000624179
1	122900001	123000000	B	-0.0275764670222997	B	-0.0243081226944923	B	-0.0274692606180906	B	-0.0308687575161457	B	-0.0316242277622222	B	-0.0126487994566559	B	-0.0311240069568157
1	123000001	123100000	B	-0.0254669841378927	B	-0.0220233853906393	B	-0.025600416585803	B	-0.0257388241589069	B	-0.0296192560344934	B	-0.022711481899023	B	-0.0323682464659214
1	123100001	123200000	B	-0.0285009946674108	B	-0.0249866358935832	B	-0.0280856285244226	B	-0.0306913759559392	B	-0.0319274999201297	B	-0.0267026033252477	B	-0.031716302037239
1	123200001	123300000	B	-0.0282993242144584	B	-0.0252123456448316	B	-0.0268885772675275	B	-0.0300683267414569	B	-0.032382346689701	B	-0.0297786388546228	B	-0.030404258519411
1	123300001	123400000	B	-0.025998705998063	B	-0.0222037602216005	B	-0.0260285791009664	B	-0.0281180310994386	B	-0.0321370065212249	B	-0.0287060532718896	B	-0.0313208475708961
1	123400001	123500000	B	-0.02669083699584	B	-0.023522175848484	B	-0.027730518952012	B	-0.0299350395798683	B	-0.0326314531266689	B	-0.0288113933056592	B	-0.0314724333584308
1	123500001	123600000	B	-0.0255704876035451	B	-0.0227154195308685	B	-0.0260900892317295	B	-0.0274120829999446	B	-0.0312548168003559	B	-0.0272249486297369	B	-0.0321210548281669
1	123600001	123700000	B	-0.0249939002096653	B	-0.0215305145829916	B	-0.026950167492032	B	-0.0306344423443079	B	-0.0318081341683864	B	-0.0254644751548767	B	-0.0324509553611278
1	123700001	123800000	B	-0.0244654677808284	B	-0.0216899793595075	B	-0.0283146053552627	B	-0.0301961936056613	B	-0.0308308601379394	B	-0.0282213110476732	B	-0.0329195074737072
1	123800001	123900000	B	-0.0241025201976299	B	-0.0219950191676616	B	-0.0275059342384338	B	-0.0282392911612987	B	-0.0297579746693372	B	-0.0285365972667932	B	-0.0327898226678371
1	123900001	124000000	B	-0.0239611193537712	B	-0.0181932970881462	B	-0.0275289099663496	B	-0.0288555603474378	B	-0.0281758140772581	B	-0.0299755074083805	B	-0.0325275510549545
1	124000001	124100000	B	-0.025692444294691	B	-0.0163717307150363	B	-0.0264728963375091	B	-0.0287179108709096	B	-0.0267618019133806	B	-0.027731304988265	B	-0.0320585966110229
1	124100001	124200000	B	-0.02736222371459	B	-0.0242894738912582	B	-0.0285122320055961	B	-0.0305226277559995	B	-0.0299083497375249	B	-0.0283579807728528	B	-0.0317207984626293
1	124200001	124300000	B	-0.0303230043500661	B	-0.0267615187913179	B	-0.0297734700143337	B	-0.0319106131792068	B	-0.0317127183079719	B	-0.0317299626767635	B	-0.0302052926272153
1	124300001	124400000	B	-0.0302915833890438	B	-0.0201862156391143	B	-0.0301828477531671	B	-0.0330815427005291	B	-0.0307774432003498	B	-0.0315923877060413	B	-0.0287884678691625
1	124400001	124500000	B	-0.0272486507892608	B	-0.0170218106359243	B	-0.0294919312000274	B	-0.0292748529464006	B	-0.0298286247998476	B	-0.0309424456208944	B	-0.0279332194477319
1	124500001	124600000	B	-0.0279076620936393	B	-0.0199282299727201	B	-0.0279158037155866	B	-0.0297972802072763	B	-0.029886120930314	B	-0.0317826457321643	B	-0.0277437139302492
1	124600001	124700000	B	-0.0273864492774009	B	-0.0202298257499933	B	-0.028743952512741	B	-0.0322558209300041	B	-0.0297926515340805	B	-0.0296983532607555	B	-0.0275005884468555
1	124700001	124800000	B	-0.0293161980807781	B	-0.0256835799664258	B	-0.0306709259748458	B	-0.0329794585704803	B	-0.0296406913548707	B	-0.0285168830305337	B	-0.0275319907814264
1	124800001	124900000	B	-0.032044269144535	B	-0.030709896236658	B	-0.0322916731238365	B	-0.0335593931376934	B	-0.0301202852278947	B	-0.03112637065351	B	-0.0272641107439994
1	124900001	125000000	B	-0.0289612915366888	B	-0.0299171209335327	B	-0.0315347425639629	B	-0.0320979617536067	B	-0.0307333823293447	B	-0.028575375676155	B	-0.027319686487317
1	125000001	125100000	B	-0.0309011582285165	B	-0.0286607220768928	B	-0.0304894242435693	B	-0.0319050662219524	B	-0.0305018424987792	B	-0.0310730338096618	B	-0.0286118853837251
1	125100001	125200000	B	-0.0273496638983488	B	-0.024472814053297	B	-0.0273572672158479	B	-0.0275947172194719	B	-0.030633520334959	B	-0.0296675581485033	B	-0.0299751758575439
1	125200001	125300000	B	-0.0279903411865234	B	-0.0271635651588439	B	-0.0265150517225265	B	-0.0294415112584829	B	-0.0285635329782962	B	-0.0273895151913166	B	-0.0310693569481372
1	125300001	125400000	B	-0.0203940849751234	B	-0.0174875482916831	B	-0.01791981048882	B	-0.0215377770364284	B	-0.0200656093657016	B	-0.0128492387011647	B	-0.0265095829963684
1	125400001	125500000	A	0.0034321299754083	A	0.0051400144584476	B	-0.0040936190634965	B	-0.00667734304443	A	0.0030530656222254	A	0.0204343143850564	B	-0.0134471552446484
1	125500001	125600000	A	0.0016068766126409	A	0.0068083545193076	B	-0.0021920802537351	B	-0.0077290446497499	A	0.0035763969644904	A	0.02439228259027	B	-0.0091243032366037
1	125600001	125700000	B	-0.0044290511868894	A	0.0019054865697398	B	-0.0031173585448414	B	-0.0104592572897672	B	-0.0028263814747333	A	0.011741317808628	A	0.0011216757120564
1	125700001	125800000	B	-0.0082028489559888	B	-0.0059613110497593	B	-0.0004685202729888	B	-0.0109480004757642	B	-0.0015720794908702	A	0.0082274470478296	A	0.0063006822019815
1	125800001	125900000	B	-0.0120224803686141	B	-0.0136361708864569	A	0.0030685097444802	B	-0.010568294674158	A	0.0052413241937756	B	-0.0064361202530562	A	0.0095510259270668
1	125900001	126000000	B	-0.0176928117871284	B	-0.0174291133880615	A	0.0037703418638557	B	-0.0050991615280508	A	0.0082506844773888	B	-0.0109573770314455	A	0.0123516703024506
1	126000001	126100000	B	-0.0191953796893358	B	-0.0203507356345653	A	0.0015472465893253	B	-0.0089532192796468	A	0.0081471884623169	B	-0.0142019186168909	A	0.0125757297500967
1	126100001	126200000	B	-0.0202537067234516	B	-0.0218669567257165	A	6.59451e+09	B	-0.013592030853033	A	0.0028945130761712	B	-0.0067278454080224	A	0.0096492748707532
1	126200001	126300000	B	-0.018727758899331	B	-0.0218756403774023	B	-0.0008286838419735	B	-0.0112863080576062	B	-0.0049322335980832	B	-0.0137937795370817	A	0.006835619919002
1	126300001	126400000	B	-0.0193443689495325	B	-0.0205022916197776	A	0.0021573968697339	B	-0.0105238808318972	B	-0.002923693973571	B	-0.0138774383813142	A	0.0062703294679522
1	126400001	126500000	B	-0.0121895167976617	B	-0.0097058666869997	A	0.0054420391097664	B	-0.0042818612419068	A	0.0106572303920984	B	-0.011337568052113	A	0.0080021582543849
1	126500001	126600000	B	-0.0144021697342395	B	-0.0102433869615197	A	0.0147284641861915	A	0.0037591843865811	A	0.0175170581787824	B	-0.0103720016777515	A	0.0125758750364184
1	126600001	126700000	B	-0.012553104199469	B	-0.012184739112854	A	0.0149145545437932	A	0.0017681015888229	A	0.0210471544414758	B	-0.0079216053709387	A	0.0133491735905408
1	126700001	126800000	B	-0.0046416595578193	B	-0.0100324107334017	A	0.0143028758466243	A	0.0023765915539115	A	0.0227643679827451	A	0.0042056213133037	A	0.0118709439411759
1	126800001	126900000	B	-0.0083162812516093	B	-0.0134403556585311	A	0.0168230440467596	A	0.0021989804226905	A	0.0178315285593271	A	0.0023643556050956	A	0.0052941185422241
1	126900001	127000000	B	-0.0079828575253486	B	-0.0102981142699718	A	0.0089528365060687	B	-0.0034458509180694	A	0.0026890689041465	B	-0.0031816393602639	B	-0.0068396292626857
1	127000001	127100000	B	-0.0014664025511592	B	-0.0059734205715358	A	0.0134624605998396	B	-0.0019615371711552	B	-0.0041429293341934	B	-0.0063533522188663	B	-0.0102607896551489
1	127100001	127200000	A	0.0039377030916512	B	-0.0025795714464038	A	0.016898076981306	A	0.0018628255929797	A	0.0019288501935079	A	0.0083052860572934	B	-0.0029473262839019
1	127200001	127300000	A	0.0182661861181259	A	0.012987240217626	A	0.0225273445248603	A	0.0147235365584492	A	0.0160915907472372	A	0.023491958156228	A	0.0088693648576736
1	127300001	127400000	A	0.0186764355748891	A	0.0154394544661045	A	0.024803590029478	A	0.0165877528488636	A	0.016517573967576	A	0.0183341689407825	A	0.0110454773530364
1	127400001	127500000	A	0.0137370517477393	A	0.0076859639957547	A	0.0208024848252534	A	0.0144345946609973	A	0.0187751892954111	A	0.0209591686725616	A	0.0074771596118807
1	127500001	127600000	A	0.0088673951104283	A	0.0019657937809824	A	0.022183321416378	A	0.0113033950328826	A	0.029552424326539	A	0.0184366274625062	A	0.0154131157323718
1	127600001	127700000	A	0.0097929565235972	A	0.0014354735612869	A	0.0251924451440572	A	0.0137829855084419	A	0.0286442823708057	A	0.0183894429355859	A	0.0140824196860194
1	127700001	127800000	A	0.0146601675078272	A	0.0140784112736582	A	0.024938479065895	A	0.0159985106438398	A	0.0275713894516229	A	0.031031833961606	A	0.0097606694325804
1	127800001	127900000	A	0.0218755882233381	A	0.0242509245872497	A	0.0268015824258327	A	0.0199257377535104	A	0.0284589286893606	A	0.0361695736646652	A	0.0102442186325788
1	127900001	128000000	A	0.0260492339730262	A	0.0279723219573497	A	0.0263377781957387	A	0.0193767715245485	A	0.0282225366681814	A	0.0367094986140728	A	0.0122233070433139
1	128000001	128100000	A	0.0240889899432659	A	0.0245981719344854	A	0.0211306288838386	A	0.0090246414765715	A	0.024533586576581	A	0.0354264751076698	A	0.0086480733007192
1	128100001	128200000	A	0.022089846432209	A	0.0256651863455772	A	0.0224074274301528	A	0.0155314449220895	A	0.0266192480921745	A	0.035707764327526	A	0.0100366417318582
1	128200001	128300000	A	0.0208434034138917	A	0.0267311688512563	A	0.0245044790208339	A	0.0186053980141878	A	0.0260617658495903	A	0.036829836666584	A	0.0076658963225781
1	128300001	128400000	A	0.0155943566933274	A	0.0245431531220674	A	0.019837487488985	A	0.0144380135461688	A	0.0246590077877044	A	0.0344395041465759	B	-0.0010306078474968
1	128400001	128500000	A	0.0106319831684231	A	0.0220800507813692	A	0.0157874189317226	A	0.0036180347669869	A	0.0265699680894613	A	0.0288552846759557	A	0.0039075217209756
1	128500001	128600000	A	0.0118286963552236	A	0.0222678165882825	A	0.0151938572525978	A	0.0038028687704354	A	0.0262560974806547	A	0.0134873297065496	A	0.0055983285419642
1	128600001	128700000	A	0.014094260521233	A	0.0253751743584871	A	0.0166109949350357	A	0.004905633162707	A	0.0280936677008867	A	0.0053112530149519	A	0.0099263945594429
1	128700001	128800000	A	0.0102932155132293	A	0.0246697701513767	A	0.0130436448380351	A	0.0010225130245089	A	0.0254937354475259	A	0.0014798614429309	A	0.0075306696817278
1	128800001	128900000	B	-0.0070031420327723	A	0.013086074963212	B	-0.0011519039981067	B	-0.0094844968989491	A	0.0083886999636888	A	0.0021541030146181	B	-0.0107887452468276
1	128900001	129000000	B	-0.0239205956459045	B	-0.003986625932157	B	-0.0189321152865886	B	-0.0255020037293434	B	-0.0227373726665973	B	-0.0218520779162645	B	-0.029772849753499
1	129000001	129100000	B	-0.0280869472771883	B	-0.0052565564401447	B	-0.023102855309844	B	-0.0285345334559679	B	-0.0239018872380256	B	-0.0209156759083271	B	-0.0304303485900163
1	129100001	129200000	B	-0.0279676876962184	B	-0.0058589046820998	B	-0.0218026731163263	B	-0.0258687119930982	B	-0.022052938118577	B	-0.0249376371502876	B	-0.0291474536061286
1	129200001	129300000	B	-0.0286595225334167	A	0.0006266722339205	B	-0.022611130028963	B	-0.0262494161725044	B	-0.0195900853723287	B	-0.0232977792620658	B	-0.0285689923912286
1	129300001	129400000	B	-0.0293524507433176	B	-0.002081228652969	B	-0.023174000903964	B	-0.0283909309655427	B	-0.0251827929168939	B	-0.0250727739185094	B	-0.0301390700042247
1	129400001	129500000	B	-0.0291476268321275	A	0.0011515823425725	B	-0.0265028066933155	B	-0.0296114590018987	B	-0.0272164233028888	B	-0.025715759024024	B	-0.0309638101607561
1	129500001	129600000	B	-0.027761772274971	A	0.00322668813169	B	-0.0256316028535366	B	-0.0277375075966119	B	-0.0265884865075349	B	-0.0274135060608387	B	-0.0310901068150997
1	129600001	129700000	B	-0.0301354974508285	A	0.0009253952885046	B	-0.0263414476066827	B	-0.0284295063465833	B	-0.0282075256109237	B	-0.0291105248034	B	-0.0309688169509172
1	129700001	129800000	B	-0.0285496320575475	B	-0.0020524954888969	B	-0.0269510801881551	B	-0.028479516506195	B	-0.0290936306118965	B	-0.0287023093551397	B	-0.0311090443283319
1	129800001	129900000	B	-0.0280521865934133	B	-0.0010218139505013	B	-0.026715001091361	B	-0.0290916748344898	B	-0.0285933725535869	B	-0.0279890839010477	B	-0.0318128690123558
1	129900001	130000000	B	-0.031268436461687	B	-0.0043477877043187	B	-0.0280130952596664	B	-0.030521685257554	B	-0.0285460576415061	B	-0.0288076605647802	B	-0.0321293659508228
1	130000001	130100000	B	-0.028921328485012	B	-0.007621381431818	B	-0.027046563103795	B	-0.0302112735807895	B	-0.029753116890788	B	-0.0281635131686925	B	-0.0325178056955337
1	130100001	130200000	B	-0.0302280541509389	B	-0.0009392808424308	B	-0.0256868507713079	B	-0.0301659908145666	B	-0.0266903601586818	B	-0.0261445436626672	B	-0.0307702217251062
1	130200001	130300000	B	-0.0271698217839002	A	0.0048986822366714	B	-0.0224966052919626	B	-0.0259648822247982	B	-0.0199292786419391	B	-0.020474724471569	B	-0.0253172386437654
1	130300001	130400000	B	-0.025879492983222	A	0.0001036839239532	B	-0.0203546918928623	B	-0.0238924361765384	B	-0.0167293213307857	B	-0.0181447882205247	B	-0.0223199240863323
1	130400001	130500000	B	-0.0234239865094423	B	-0.0006719282828271	B	-0.016220673918724	B	-0.0185185372829437	B	-0.0156761221587657	A	0.0036029547918587	B	-0.0238839425146579
1	130500001	130600000	B	-0.0223310831934213	A	0.0024230151902884	B	-0.0105667700991034	B	-0.0166982021182775	B	-0.0127486819401383	A	0.0038287180941551	B	-0.0245549138635396
1	130600001	130700000	B	-0.0166420526802539	A	0.0055899922735989	B	-0.004059609491378	B	-0.0127434954047203	B	-0.0055515523999929	A	0.0083349496126174	B	-0.0204449407756328
1	130700001	130800000	B	-0.0001322164316661	A	0.0152767561376094	A	0.0117345079779624	A	0.0007245455635711	A	0.0124508077278733	A	0.0241504050791263	B	-0.009336438961327
1	130800001	130900000	A	0.0017405598191544	A	0.0163309089839458	A	0.0172498989850282	A	0.0038432453293353	A	0.0077979457564651	A	0.0134859010577201	B	-0.0140076195821166
1	130900001	131000000	A	0.0045492406934499	A	0.0154308332130312	A	0.0150082791224122	A	0.0046543781645596	A	0.0070893703959882	A	0.0095195937901735	B	-0.0162075962871313
1	131000001	131100000	A	0.0184582937508821	A	0.0270504783838987	A	0.0250454284250736	A	0.0213171243667602	A	0.0244595408439636	A	0.0262347161769866	A	0.0010441521881148
1	131100001	131200000	A	0.0279866885393857	A	0.0330857373774051	A	0.033471655100584	A	0.029668616130948	A	0.031149448826909	A	0.0366950966417789	A	0.0177540648728609
1	131200001	131300000	A	0.0282719191163778	A	0.032921876758337	A	0.0348045565187931	A	0.0321709811687469	A	0.0313819013535976	A	0.0357379242777824	A	0.0189257804304361
1	131300001	131400000	A	0.0267710369080305	A	0.0319132879376411	A	0.0307576097548007	A	0.0243388451635837	A	0.0301709081977605	A	0.0320545695722103	A	0.0211454611271619
1	131400001	131500000	A	0.0280995219945907	A	0.0322958379983902	A	0.0329232141375541	A	0.0268328990787267	A	0.0313740372657775	A	0.0335005745291709	A	0.0229663345962762
1	131500001	131600000	A	0.0321821570396423	A	0.0347396582365036	A	0.0363181121647357	A	0.0335579626262187	A	0.0329341888427734	A	0.0356504470109939	A	0.0230026058852672
1	131600001	131700000	A	0.0329590663313865	A	0.032698031514883	A	0.0347826145589351	A	0.0306732971221208	A	0.0314227528870105	A	0.0337664000689983	A	0.0226647444069385
1	131700001	131800000	A	0.0347254872322082	A	0.0346431881189346	A	0.0371787995100021	A	0.0359419547021389	A	0.03298095241189	A	0.0351192504167556	A	0.0236607566475868
1	131800001	131900000	A	0.0349877662956714	A	0.0357109010219574	A	0.0393037647008895	A	0.0393132902681827	A	0.0347510986030101	A	0.0369820073246955	A	0.0264788325875997
1	131900001	132000000	A	0.0342164821922779	A	0.0344901159405708	A	0.0396934412419796	A	0.0411046706140041	A	0.0345863848924636	A	0.0368724316358566	A	0.0289213228970766
1	132000001	132100000	A	0.0364003181457519	A	0.0344937890768051	A	0.0399043075740337	A	0.0420990660786628	A	0.0352887883782386	A	0.0369952768087387	A	0.0294741559773683
1	132100001	132200000	A	0.0331988781690597	A	0.0311146583408117	A	0.0387679152190685	A	0.0405638329684734	A	0.0347936637699604	A	0.0367374941706657	A	0.0302230548113584
1	132200001	132300000	A	0.0344201289117336	A	0.0325800217688083	A	0.0393635667860507	A	0.0391549691557884	A	0.034717421978712	A	0.0363004095852375	A	0.0304566286504268
1	132300001	132400000	A	0.0349489636719226	A	0.0333934985101223	A	0.0374862104654312	A	0.0368798859417438	A	0.03305484354496	A	0.0334497615694999	A	0.0292575489729642
1	132400001	132500000	A	0.0360958836972713	A	0.0343195758759975	A	0.0389595441520214	A	0.0435660667717456	A	0.0348322130739688	A	0.0364037007093429	A	0.0298789590597152
1	132500001	132600000	A	0.0356544777750968	A	0.0326103121042251	A	0.0394164733588695	A	0.0417198985815048	A	0.0350677408277988	A	0.0363204255700111	A	0.0303636509925127
1	132600001	132700000	A	0.0338743217289447	A	0.0292362980544567	A	0.0394145026803016	A	0.0419181361794471	A	0.034368373453617	A	0.0346215069293975	A	0.0304661355912685
1	132700001	132800000	A	0.0309054981917142	A	0.0252821259200572	A	0.0363295897841453	A	0.036095555871725	A	0.0342277251183986	A	0.0345769971609115	A	0.0307308230549097
1	132800001	132900000	A	0.034089233726263	A	0.0286253746598958	A	0.0374558605253696	A	0.0387681014835834	A	0.0341021902859211	A	0.0348760485649108	A	0.0307748764753341
1	132900001	133000000	A	0.0334258377552032	A	0.0291755013167858	A	0.037649966776371	A	0.0399466566741466	A	0.0342970602214336	A	0.0353040881454944	A	0.0305398367345333
1	133000001	133100000	A	0.0348731130361557	A	0.0324079915881156	A	0.0390678457915782	A	0.0414003320038318	A	0.0340966023504734	A	0.0358270779252052	A	0.0302668381482362
1	133100001	133200000	A	0.033304788172245	A	0.031593918800354	A	0.0377986654639244	A	0.0384411066770553	A	0.033774297684431	A	0.0353632494807243	A	0.0301260761916637
1	133200001	133300000	A	0.0332791656255722	A	0.0308787859976291	A	0.0374545454978942	A	0.038056094199419	A	0.034193567931652	A	0.0351635105907917	A	0.0304232649505138
1	133300001	133400000	A	0.033335980027914	A	0.031787946820259	A	0.0370223522186279	A	0.0386495552957057	A	0.0336248539388179	A	0.0347633324563503	A	0.0302630253136158
1	133400001	133500000	A	0.0318949185311794	A	0.0301271378993988	A	0.0361510477960109	A	0.036651249974966	A	0.0333593860268592	A	0.034399963915348	A	0.0300439707934856
1	133500001	133600000	A	0.0318065099418163	A	0.0301536303013563	A	0.0357449427247047	A	0.0355061702430248	A	0.0331227406859397	A	0.0336951725184917	A	0.0294380281120538
1	133600001	133700000	A	0.0291289594024419	A	0.0304418820887804	A	0.0366146154701709	A	0.0364382378757	A	0.0333056524395942	A	0.0346711575984954	A	0.0295929871499538
1	133700001	133800000	A	0.0296674463897943	A	0.0277205351740121	A	0.0359324961900711	A	0.0367638394236564	A	0.0342709943652153	A	0.0347072519361972	A	0.0302160326391458
1	133800001	133900000	A	0.0293317083269357	A	0.0282162819057703	A	0.0364300794899463	A	0.0352335050702095	A	0.0341328904032707	A	0.0344224944710731	A	0.0304560828953981
1	133900001	134000000	A	0.0299630351364612	A	0.0273048970848321	A	0.0356032773852348	A	0.034974992275238	A	0.0338706597685813	A	0.0334159955382347	A	0.0303259510546922
1	134000001	134100000	A	0.0288002174347639	A	0.0278277657926082	A	0.034448966383934	A	0.0361847318708896	A	0.0339748635888099	A	0.034998882561922	A	0.0305399056524038
1	134100001	134200000	A	0.0266485940665006	A	0.0240326877683401	A	0.0360578000545501	A	0.0341386646032333	A	0.0340758711099624	A	0.0346569567918777	A	0.030111901462078
1	134200001	134300000	A	0.0303570125252008	A	0.027188366279006	A	0.0353396907448768	A	0.0364354364573955	A	0.0339759215712547	A	0.0346648022532463	A	0.0300036538392305
1	134300001	134400000	A	0.0295626986771821	A	0.0269400421530008	A	0.0360830835998058	A	0.0369903966784477	A	0.0339766778051853	A	0.0342829562723636	A	0.0293799247592687
1	134400001	134500000	A	0.0292791631072759	A	0.0298429112881422	A	0.0366287715733051	A	0.0375542491674423	A	0.0332937054336071	A	0.0336208082735538	A	0.0272732973098754
1	134500001	134600000	A	0.0283119678497314	A	0.0274956095963716	A	0.0362713411450386	A	0.034693531692028	A	0.0330480188131332	A	0.034070186316967	A	0.0273832883685827
1	134600001	134700000	A	0.0300014875829219	A	0.0269496161490678	A	0.0372786708176136	A	0.0351044349372386	A	0.0318418517708778	A	0.0350858159363269	A	0.0269144065678119
1	134700001	134800000	A	0.0299130529165267	A	0.028440611436963	A	0.0361703969538211	A	0.0342271886765956	A	0.0331559851765632	A	0.0345754772424697	A	0.028852691873908
1	134800001	134900000	A	0.0305849239230155	A	0.0302214603871107	A	0.0359725579619407	A	0.035901840776205	A	0.0331751182675361	A	0.033103734254837	A	0.0283275414258241
1	134900001	135000000	A	0.0323926098644733	A	0.0310630779713392	A	0.0368653424084186	A	0.036158014088869	A	0.033332709223032	A	0.0349862091243267	A	0.0285792220383882
1	135000001	135100000	A	0.0340318717062473	A	0.0318828970193862	A	0.0377212166786193	A	0.039124459028244	A	0.0327431671321392	A	0.0356806106865406	A	0.0281462408602237
1	135100001	135200000	A	0.0327336303889751	A	0.031126020476222	A	0.0377304889261722	A	0.0385864749550819	A	0.0341578535735607	A	0.0363928563892841	A	0.0289285257458686
1	135200001	135300000	A	0.0349515080451965	A	0.0324981361627578	A	0.0379403345286846	A	0.0399871990084648	A	0.0338494405150413	A	0.036024309694767	A	0.0287467893213033
1	135300001	135400000	A	0.0338495224714279	A	0.0335627868771553	A	0.0384577438235282	A	0.0394065231084823	A	0.0328906811773777	A	0.0361978635191917	A	0.027656465768814
1	135400001	135500000	A	0.0357510447502136	A	0.0352229923009872	A	0.0390075705945491	A	0.0410295464098453	A	0.0330236554145813	A	0.036768153309822	A	0.0273818671703338
1	135500001	135600000	A	0.0352145917713642	A	0.0342888496816158	A	0.0388961806893348	A	0.0417104251682758	A	0.0347513854503631	A	0.0372696034610271	A	0.0301442574709653
1	135600001	135700000	A	0.0356061682105064	A	0.0337233170866966	A	0.0390299372375011	A	0.0396504923701286	A	0.0344988256692886	A	0.0371533818542957	A	0.0301201287657022
1	135700001	135800000	A	0.0359475873410701	A	0.0363435000181198	A	0.0394227430224418	A	0.0422833152115345	A	0.0349201783537864	A	0.0374638475477695	A	0.0302237123250961
1	135800001	135900000	A	0.0372307375073432	A	0.0357384979724884	A	0.0394243076443672	A	0.0418283976614475	A	0.0336169153451919	A	0.0378175377845764	A	0.029864003881812
1	135900001	136000000	A	0.0367462709546089	A	0.0353404060006141	A	0.0399022214114666	A	0.0420294553041458	A	0.0328519269824028	A	0.036330260336399	A	0.0294294785708189
1	136000001	136100000	A	0.0370958633720874	A	0.0351729728281497	A	0.0405679754912853	A	0.0414927788078784	A	0.0341885425150394	A	0.0375388413667678	A	0.0296407993882894
1	136100001	136200000	A	0.0367192737758159	A	0.0341691635549068	A	0.0387944057583808	A	0.0399781502783298	A	0.0341605953872203	A	0.0378738567233085	A	0.0289381463080644
1	136200001	136300000	A	0.0344395637512207	A	0.0314697064459323	A	0.038273699581623	A	0.0382880829274654	A	0.0340045094490051	A	0.0376603119075298	A	0.0288599077612161
1	136300001	136400000	A	0.0330193899571895	A	0.0317752324044704	A	0.037532914429903	A	0.0340631678700447	A	0.0339125283062458	A	0.0377737283706665	A	0.0290479306131601
1	136400001	136500000	A	0.03381834551692	A	0.0308958794921636	A	0.0363850705325603	A	0.0355969332158565	A	0.0336376503109931	A	0.0379266031086444	A	0.0288013834506273
1	136500001	136600000	A	0.029288737103343	A	0.0236153695732355	A	0.0323095880448818	A	0.026176618412137	A	0.0312256403267383	A	0.0372054502367973	A	0.025910060852766
1	136600001	136700000	A	0.0285553038120269	A	0.0214565005153417	A	0.0301493760198354	A	0.0219954662024974	A	0.0315887182950973	A	0.0363429225981235	A	0.026157634332776
1	136700001	136800000	A	0.0236310884356498	A	0.0195812620222568	A	0.0271890182048082	A	0.0165872350335121	A	0.029887581244111	A	0.0360961072146892	A	0.0251907333731651
1	136800001	136900000	A	0.0236857421696186	A	0.0173865221440792	A	0.0248522162437438	A	0.0138872796669602	A	0.0269759446382522	A	0.0296184122562408	A	0.0243205241858959
1	136900001	137000000	A	0.0248200688511133	A	0.0171776600182056	A	0.0265322905033826	A	0.0179950688034296	A	0.0269535090774297	A	0.0330467000603675	A	0.023922549560666
1	137000001	137100000	A	0.0200380943715572	A	0.0070386370643973	A	0.0183300320059061	A	0.0073160110041499	A	0.0225476846098899	A	0.0247678961604833	A	0.0222764164209365
1	137100001	137200000	A	0.019819064065814	A	0.0103716384619474	A	0.0176122710108757	A	0.0045054745860397	A	0.0226282551884651	A	0.0238925218582153	A	0.0232054311782121
1	137200001	137300000	A	0.0103421993553638	B	-0.0006635832833126	A	0.0132799474522471	B	-0.0014654495753347	A	0.0242950338870286	A	0.0061237839981913	A	0.0238175857812166
1	137300001	137400000	B	-0.0063021844252943	B	-0.0151005731895565	B	-0.0001098220236599	B	-0.0121230669319629	A	0.0242275651544332	B	-0.0010948884300887	A	0.0228683035820722
1	137400001	137500000	B	-0.0107224211096763	B	-0.0220026653259992	B	-0.00275314389728	B	-0.0158295594155788	A	0.0207507368177175	B	-0.0153010562062263	A	0.0220872070640325
1	137500001	137600000	B	-0.0073197376914322	B	-0.0210510939359664	B	-0.0062462021596729	B	-0.0172867830842733	A	0.0205354373902082	B	-0.0159993227571249	A	0.0230693649500608
1	137600001	137700000	B	-0.0063321930356323	B	-0.0196797121316194	B	-0.0048794005997478	B	-0.0172132924199104	A	0.0231479369103908	B	-0.01480892021209	A	0.0236737355589866
1	137700001	137800000	B	-0.0085740787908434	B	-0.0182374510914087	B	-0.0077212089672684	B	-0.0165429413318634	A	0.0205446295440197	B	-0.0162745453417301	A	0.0224757120013237
1	137800001	137900000	B	-0.0087302951142191	B	-0.0193530656397342	B	-0.0006828836048953	B	-0.0135460570454597	A	0.0233133677393198	B	-0.0192742832005023	A	0.0243300516158342
1	137900001	138000000	A	0.0011246739886701	B	-0.0084526492282748	A	0.0050708050839602	B	-0.0048601916059851	A	0.0252268314361572	B	-0.0189560074359178	A	0.0235624015331268
1	138000001	138100000	B	-0.0051270392723381	B	-0.0108444578945636	B	-0.0003286775317974	B	-0.012284729629755	A	0.018630214035511	B	-0.0166246183216571	A	0.018997186794877
1	138100001	138200000	B	-0.0099231395870447	B	-0.008052391000092	B	-0.0082683991640806	B	-0.0184132121503353	A	0.0075730388052761	B	-0.0154184056445956	A	0.0078069320879876
1	138200001	138300000	B	-0.0095937922596931	B	-0.0046181185171008	B	-0.0089398631826043	B	-0.0232480727136135	A	0.0016676811501383	B	-0.0153918312862515	A	0.0065905870869755
1	138300001	138400000	B	-0.008233193308115	A	0.0078967176377773	B	-0.0036495677195489	B	-0.0135421799495816	A	0.0107485139742493	B	-0.0136607531458139	A	0.0158361792564392
1	138400001	138500000	B	-0.006467055529356	A	0.0134893869981169	B	-0.0016943037044256	B	-0.0130543690174818	A	0.0124770551919937	B	-0.014581898227334	A	0.0190513525158166
1	138500001	138600000	A	0.0023760823532938	A	0.0147650502622127	A	0.0043935012072324	B	-0.00432536797598	A	0.0194765254855155	A	0.00473900930956	A	0.0208369717001914
1	138600001	138700000	A	0.0006399993435479	A	0.0125577459111809	A	0.0043430482037365	B	-0.0086309593170881	A	0.0155987739562988	B	-0.0038527636788785	A	0.0167135931551456
1	138700001	138800000	B	-0.0003940323367714	A	0.0098386853933334	A	0.0047870883718132	B	-0.0083222724497318	A	0.0114501016214489	B	-0.0078311143442988	A	0.0146044017747044
1	138800001	138900000	A	0.0019055447774007	A	0.0164088606834411	A	0.0057084392756223	B	-0.004136009607464	A	0.0168030280619859	A	0.0126362014561891	A	0.0138444080948829
1	138900001	139000000	A	0.0050424765795469	A	0.0182537045329809	A	0.0079572713002562	B	-0.0038964182604104	A	0.0195140838623046	A	0.0154225705191493	A	0.0163689758628606
1	139000001	139100000	A	0.0041514262557029	A	0.0187570936977863	A	0.0075220488943159	B	-0.0069639110006392	A	0.0208489671349525	A	0.0125084985047578	A	0.0183440800756216
1	139100001	139200000	A	0.0018494109390303	A	0.0146464146673679	A	0.0033223039936274	B	-0.0070525482296943	A	0.0162364486604928	A	0.0083995359018445	A	0.0154276266694068
1	139200001	139300000	B	-0.0056068263947963	A	0.0112916082143783	A	0.0015781975816935	B	-0.010580176487565	A	0.0119884926825761	B	-0.0072053670883178	A	0.0109711177647113
1	139300001	139400000	B	-0.0180936586111783	B	-0.0109459944069385	B	-0.0058873086236417	B	-0.0159032717347145	A	0.0100195165723562	B	-0.0017772273859009	A	0.009178627282381
1	139400001	139500000	B	-0.0170330051332712	B	-0.0130277909338474	B	-0.0042409361340105	B	-0.0069309300743043	A	0.0093268062919378	A	0.0226794015616178	B	-0.0019778737332671
1	139500001	139600000	B	-0.030036861076951	B	-0.0334403328597545	B	-0.0290830414742231	B	-0.0316581465303897	B	-0.0203224252909421	A	0.0041641276329755	B	-0.0244699120521545
1	139600001	139700000	B	-0.0262551978230476	B	-0.0248176902532577	B	-0.0225860513746738	B	-0.0219627674669027	B	-0.025041963905096	B	-0.0107508189976215	B	-0.0274937506765127
1	139700001	139800000	B	-0.0222850814461708	A	-0.0	A	0.0	A	0.0	B	-0.0251428075134754	B	-0.018737630918622	B	-0.027553891763091
1	139800001	139900000	B	-0.0292329229414463	B	-0.0316383056342601	B	-0.0293525215238332	B	-0.0310671441256999	B	-0.0239182617515325	B	-0.0220962073653936	B	-0.0270898137241601
1	139900001	140000000	B	-0.0291510596871376	B	-0.0319244265556335	B	-0.0297419596463441	B	-0.0322738215327262	B	-0.023608524352312	B	-0.0227334294468164	B	-0.0263853017240762
1	140000001	140100000	B	-0.0295682419091463	B	-0.0335286147892475	B	-0.0307278987020254	B	-0.031998623162508	B	-0.0220870710909366	B	-0.0227671917527914	B	-0.0243718437850475
1	140100001	140200000	B	-0.0240062773227691	B	-0.0260619316250085	B	-0.026118641719222	B	-0.0270230825990438	B	-0.0149944387376308	B	-0.0128155341371893	B	-0.0159720815718173
1	140200001	140300000	B	-0.0281479116529226	B	-0.0304313693195581	B	-0.0245946999639272	B	-0.0279233455657959	B	-0.0096538569778203	B	-0.0014268935192376	B	-0.0124782836064696
1	140300001	140400000	B	-0.0309412572532892	B	-0.0301530417054891	B	-0.0262390114367008	B	-0.0290136542171239	B	-0.0128068169578909	B	-0.0055059674195945	B	-0.0120149841532111
1	140400001	140500000	B	-0.0295157767832279	B	-0.0283279754221439	B	-0.0251202285289764	B	-0.0272723007947206	B	-0.0101850414648652	A	0.0068906163796782	B	-0.012076461687684
1	140500001	140600000	B	-0.0264209657907485	B	-0.0242005810141563	B	-0.0268435794860124	B	-0.0299165155738592	B	-0.0124727664515376	B	-0.0158557333052158	B	-0.0112348804250359
1	140600001	140700000	B	-0.0274031981825828	B	-0.0278551466763019	B	-0.0300114527344703	B	-0.0323106683790683	B	-0.0143834771588444	B	-0.0203952267765998	B	-0.014119766652584
1	140700001	140800000	B	-0.0250522270798683	B	-0.024563543498516	B	-0.029006827622652	B	-0.0294539649039506	B	-0.0161033235490322	B	-0.0239779390394687	B	-0.0160322207957506
1	140800001	140900000	B	-0.0228400770574808	B	-0.0219416134059429	B	-0.0293320566415786	B	-0.031632475554943	B	-0.0167578775435686	B	-0.0247870571911335	B	-0.0158631689846515
1	140900001	141000000	B	-0.0185037944465875	B	-0.0164646208286285	B	-0.0275229662656784	B	-0.0283232405781745	B	-0.0171633251011371	B	-0.0229324083775281	B	-0.0158463697880506
1	141000001	141100000	B	-0.0249004047363996	B	-0.0251714214682579	B	-0.0289269424974918	B	-0.0295468773692846	B	-0.0166235025972127	B	-0.024335578083992	B	-0.0162280015647411
1	141100001	141200000	B	-0.0238215960562229	B	-0.0234001036733388	B	-0.0284045003354549	B	-0.0291344188153743	B	-0.0143478261306881	B	-0.0236724261194467	B	-0.0149680217728018
1	141200001	141300000	B	-0.0260989349335432	B	-0.0257814209908247	B	-0.0291485674679279	B	-0.0319853387773036	B	-0.0179649479687213	B	-0.0220975577831268	B	-0.0165138151496648
1	141300001	141400000	B	-0.0247767753899097	B	-0.0253133885562419	B	-0.0283421799540519	B	-0.0326113700866699	B	-0.0159027557820081	B	-0.0219856780022382	B	-0.0138716418296098
1	141400001	141500000	B	-0.0235058311372995	B	-0.0227753836661577	B	-0.0260704234242439	B	-0.0273903738707304	B	-0.0141779752448201	B	-0.0237167868763208	B	-0.0135273830965161
1	141500001	141600000	B	-0.0253666825592517	B	-0.0239774528890848	B	-0.0266319345682859	B	-0.0301703792065382	B	-0.0173721257597208	B	-0.0229914616793394	B	-0.0164593029767274
1	141600001	141700000	B	-0.0212713927030563	B	-0.0220179427415132	B	-0.0262300912290811	B	-0.0288065560162067	B	-0.0143886087462306	B	-0.0179304834455251	B	-0.0158149003982543
1	141700001	141800000	B	-0.0233199223875999	B	-0.0205433126538991	B	-0.0276997704058885	B	-0.0303564388304948	B	-0.0161790829151868	B	-0.0173036307096481	B	-0.0163515135645866
1	141800001	141900000	B	-0.0227015819400548	B	-0.0219507534056901	B	-0.0275381300598382	B	-0.0303644463419914	B	-0.0169396419078111	B	-0.0188171993941068	B	-0.0159957893192768
1	141900001	142000000	B	-0.0204197317361831	B	-0.0198265649378299	B	-0.0267112199217081	B	-0.0288568865507841	B	-0.0135995112359523	B	-0.0232410728931427	B	-0.0134344743564724
1	142000001	142100000	B	-0.0196205750107765	B	-0.012122306972742	B	-0.0255233310163021	B	-0.0292918365448713	B	-0.0167104918509721	B	-0.0249370522797107	B	-0.0157386660575866
1	142100001	142200000	B	-0.0221083182841539	B	-0.0044837635941803	B	-0.0269501712173223	B	-0.0298326388001441	B	-0.015498599037528	B	-0.0240112617611885	B	-0.0147479614242911
1	142200001	142300000	B	-0.0224588885903358	B	-0.0135495718568563	B	-0.025710429996252	B	-0.0292701423168182	B	-0.0165093969553709	B	-0.0273402351886034	B	-0.0161725226789712
1	142300001	142400000	B	-0.0233823284506797	B	-0.0152165535837411	B	-0.0284826140850782	B	-0.0299187377095222	B	-0.018541369587183	B	-0.0274260025471448	B	-0.0182496644556522
1	142400001	142500000	B	-0.0234086625277996	B	-0.0143263470381498	B	-0.0273956917226314	B	-0.028714932501316	B	-0.0196130704134702	B	-0.0266420133411884	B	-0.0184321906417608
1	142500001	142600000	B	-0.0235152598470449	B	-0.0199066251516342	B	-0.0278848800808191	B	-0.0284904055297374	B	-0.0204574223607778	B	-0.0262574609369039	B	-0.019281443208456
1	142600001	142700000	B	-0.0204078424721956	B	-0.0187869723886251	B	-0.0251071117818355	B	-0.0283829867839813	B	-0.0205187425017356	B	-0.0261738803237676	B	-0.0185589790344238
1	142700001	142800000	B	-0.0215582493692636	B	-0.0183132272213697	B	-0.0275162179023027	B	-0.0294399335980415	B	-0.0162076465785503	B	-0.0255198702216148	B	-0.0148132154718041
1	142800001	142900000	B	-0.0237957835197448	B	-0.0216517001390457	B	-0.028639068827033	B	-0.0318609289824962	B	-0.0165375974029302	B	-0.0271203331649303	B	-0.0142817022278904
1	142900001	143000000	B	-0.0240964461117982	B	-0.0200233981013298	B	-0.0272802896797657	B	-0.0290550794452428	B	-0.0113828806206583	B	-0.0284071657806634	B	-0.0104150855913758
1	143000001	143100000	B	-0.0233958717435598	B	-0.0220303274691104	B	-0.0266255140304565	B	-0.0299155004322528	B	-0.0127937840297818	B	-0.0270649902522563	B	-0.0084765059873461
1	143100001	143200000	B	-0.0211635194718837	B	-0.0193877276033163	B	-0.0259426310658454	B	-0.0295328870415687	B	-0.0132903968915343	B	-0.0262689534574747	B	-0.009209044277668
1	143200001	143300000	B	-0.0224401224404573	B	-0.02238998003304	B	-0.0266374126076698	B	-0.0294733084738254	B	-0.0146466754376888	B	-0.0229247994720935	B	-0.0099184261634945
1	143300001	143400000	B	-0.0185319986194372	B	-0.0187498517334461	B	-0.0229315180331468	B	-0.0275316685438156	B	-0.0155879873782396	B	-0.023049671202898	B	-0.0108696008101105
1	143400001	143500000	B	-0.0174180567264556	B	-0.0161845032125711	B	-0.0216891523450613	B	-0.024163419380784	B	-0.0142564764246344	B	-0.0235498808324337	B	-0.0104287974536418
1	143500001	143600000	B	-0.0174466166645288	B	-0.0170501321554183	B	-0.01941460929811	B	-0.0246293079107999	B	-0.0094540184363722	B	-0.0158034395426511	B	-0.0058575123548507
1	143600001	143700000	B	-0.0067694797180593	B	-0.0030845669098198	B	-0.006880288477987	B	-0.0084891011938452	A	0.0055471789091825	A	0.0207032319158315	B	-0.0002183151809731
1	143700001	143800000	B	-0.0004379028105176	A	0.0007853375864215	B	-0.0045090927742421	B	-0.0068845557980239	A	0.0087665095925331	A	0.0241740364581346	A	0.0013096107868477
1	143800001	143900000	B	-0.0053169750608503	B	-0.0032084095291793	B	-0.0173466093838214	B	-0.021532479673624	A	0.000740292656701	B	-0.0013207843294367	B	-0.0004999852390028
1	143900001	144000000	B	-0.0079880254343152	B	-0.0034223259426653	B	-0.0158217065036296	B	-0.02399786375463	A	0.0027381607796996	B	-0.0165069997310638	A	0.0032809081021696
1	144000001	144100000	B	-0.0149514386430382	A	0.0022583159152418	B	-0.0203855242580175	B	-0.0246311239898204	B	-0.0028272517956793	B	-0.0164624042809009	B	-0.0058443155139684
1	144100001	144200000	B	-0.0194559656083583	B	-0.0016209026798605	B	-0.0230974610894918	B	-0.0281187817454338	B	-0.0067173740826547	B	-0.0201790519058704	B	-0.0083154514431953
1	144200001	144300000	B	-0.0220166016370058	B	-0.017655985429883	B	-0.0256669893860816	B	-0.0287735853344202	B	-0.012297392822802	B	-0.023115063086152	B	-0.0128507483750581
1	144300001	144400000	B	-0.0203531384468078	B	-0.0163124073296785	B	-0.0223546810448169	B	-0.0255947057157754	B	-0.0119127547368407	B	-0.0213371980935335	B	-0.0111684240400791
1	144400001	144500000	B	-0.0170530024915933	B	-0.0150666953995823	B	-0.0203177127987146	B	-0.0214211568236351	B	-0.0108125414699316	B	-0.0220050141215324	B	-0.0084482170641422
1	144500001	144600000	B	-0.0186582338064908	B	-0.0187656413763761	B	-0.0237290821969509	B	-0.0243996176868677	B	-0.0128203965723514	B	-0.0253838039934635	B	-0.0105686848983168
1	144600001	144700000	B	-0.0225174110382795	B	-0.0223393756896257	B	-0.0269477423280477	B	-0.0291164722293615	B	-0.0167781207710504	B	-0.0273547116667032	B	-0.0158227030187845
1	144700001	144800000	B	-0.0210470333695411	B	-0.0230255275964736	B	-0.02608491666615	B	-0.0283014681190252	B	-0.0168495252728462	B	-0.0252818837761878	B	-0.0181124247610569
1	144800001	144900000	B	-0.0209418088197708	B	-0.0243020039051771	B	-0.0251945238560438	B	-0.0275480635464191	B	-0.0168523732572793	B	-0.0249221473932266	B	-0.0177465192973613
1	144900001	145000000	B	-0.0225083921104669	B	-0.0248152557760477	B	-0.0259597357362508	B	-0.0289231147617101	B	-0.015132263302803	B	-0.0255643650889396	B	-0.0177699699997901
1	145000001	145100000	B	-0.0229153502732515	B	-0.0250388663262128	B	-0.0285128187388181	B	-0.028364336118102	B	-0.0119761331006884	B	-0.0222722105681896	B	-0.0153918741270899
1	145100001	145200000	B	-0.0221254713833332	B	-0.0252674669027328	B	-0.0260144080966711	B	-0.0282914265990257	B	-0.0162842329591512	B	-0.0237576030194759	B	-0.0195911712944507
1	145200001	145300000	B	-0.0244561564177274	B	-0.027538301423192	B	-0.027656614780426	B	-0.0320162624120712	B	-0.0183555092662572	B	-0.0253622829914093	B	-0.0206293612718582
1	145300001	145400000	B	-0.022821320220828	B	-0.0252043586224317	B	-0.0267329048365354	B	-0.0281926896423101	B	-0.0174897536635398	B	-0.0228653009980916	B	-0.0198987852782011
1	145400001	145500000	B	-0.0230059772729873	B	-0.0252675432711839	B	-0.0264393631368875	B	-0.0276103187352418	B	-0.0189040303230285	B	-0.0226627364754676	B	-0.0219214148819446
1	145500001	145600000	B	-0.0232894401997327	B	-0.0256024114787578	B	-0.0271154958754777	B	-0.0295911319553852	B	-0.0148619478568434	B	-0.0218937508761882	B	-0.0206926502287387
1	145600001	145700000	B	-0.0216996502131223	B	-0.026527602225542	B	-0.0282424390316009	B	-0.0290844514966011	B	-0.0181946977972984	B	-0.024873811751604	B	-0.021549517288804
1	145700001	145800000	B	-0.0232472904026508	B	-0.0274161715060472	B	-0.0276408717036247	B	-0.0283203218132257	B	-0.0205800682306289	B	-0.0251167230308055	B	-0.0223724674433469
1	145800001	145900000	B	-0.0250927992165088	B	-0.0272975172847509	B	-0.027981286868453	B	-0.0292653478682041	B	-0.0211242716759443	B	-0.0232757590711116	B	-0.0234358590096235
1	145900001	146000000	B	-0.0243292618542909	B	-0.0275801643729209	B	-0.0281327124685049	B	-0.0300733391195535	B	-0.0228050407022237	B	-0.0245727393776178	B	-0.0245799105614423
1	146000001	146100000	B	-0.0225687976926565	B	-0.0258463192731142	B	-0.0254512652754783	B	-0.0258369836956262	B	-0.0228115506470203	B	-0.0255184713751077	B	-0.024489801377058
1	146100001	146200000	B	-0.0212875250726938	B	-0.0252469386905431	B	-0.0269974786788225	B	-0.0277143940329551	B	-0.0227407105267047	B	-0.0214609764516353	B	-0.0243759974837303
1	146200001	146300000	B	-0.0225880723446607	B	-0.0250457059592008	B	-0.0273256264626979	B	-0.0293207112699747	B	-0.021466065198183	B	-0.0194148626178503	B	-0.023285998031497
1	146300001	146400000	B	-0.0210211165249347	B	-0.0256723314523696	B	-0.0259870048612356	B	-0.0281202923506498	B	-0.0170184280723333	B	-0.0082157906144857	B	-0.021139608696103
1	146400001	146500000	B	-0.0201562587171793	B	-0.0214198306202888	B	-0.0236773528158664	B	-0.0254533402621746	B	-0.0116722844541072	B	-0.0095520811155438	B	-0.0165586657822132
1	146500001	146600000	B	-0.0192793402820825	B	-0.0218286514282226	B	-0.0249569937586784	B	-0.0264962837100029	B	-0.0102539081126451	B	-0.0190246012061834	B	-0.0134313609451055
1	146600001	146700000	B	-0.019603120163083	B	-0.0230594649910926	B	-0.025297675281763	B	-0.0259394012391567	B	-0.0130233615636825	B	-0.0192848350852727	B	-0.0157271809875965
1	146700001	146800000	B	-0.0206929743289947	B	-0.0216552894562482	B	-0.0254431311041116	B	-0.0267176087945699	B	-0.012670274823904	B	-0.022521436214447	B	-0.0142982555553317
1	146800001	146900000	B	-0.0228283740580081	B	-0.0228968076407909	B	-0.0256583392620086	B	-0.0273611173033714	B	-0.0152975860983133	B	-0.0217335540801286	B	-0.0149061223492026
1	146900001	147000000	B	-0.0236064940690994	B	-0.0265823286026716	B	-0.0270934663712978	B	-0.028436467051506	B	-0.0162028092890977	B	-0.0222332272678613	B	-0.015978580340743
1	147000001	147100000	B	-0.0212783906608819	B	-0.0231439713388681	B	-0.0258797705173492	B	-0.0273239761590957	B	-0.011567261070013	B	-0.0210377257317304	B	-0.0120593542233109
1	147100001	147200000	B	-0.0219648573547601	B	-0.0232556276023387	B	-0.0264717303216457	B	-0.0283567272126674	B	-0.0123663675040006	B	-0.0200337059795856	B	-0.011001493781805
1	147200001	147300000	B	-0.0202615689486265	B	-0.0191987473517656	B	-0.0247322618961334	B	-0.0269226022064685	B	-0.0129809016361832	B	-0.012731896713376	B	-0.0139299724251031
1	147300001	147400000	B	-0.021939355880022	B	-0.0232623368501663	B	-0.0254635084420442	B	-0.0272741727530956	B	-0.0171510055661201	B	-0.021982654929161	B	-0.0184243358671665
1	147400001	147500000	B	-0.0218204353004694	B	-0.0237142946571111	B	-0.0251658428460359	B	-0.02720233425498	B	-0.0181936938315629	B	-0.02256765589118	B	-0.0183554403483867
1	147500001	147600000	B	-0.0219918731600046	B	-0.0242923479527235	B	-0.0257971752434968	B	-0.0271950867027044	B	-0.0196340791881084	B	-0.0236172396689653	B	-0.0217446703463792
1	147600001	147700000	B	-0.0232371874153614	B	-0.0255739446729421	B	-0.0265907738357782	B	-0.0268124584108591	B	-0.0207191705703735	B	-0.0232221577316522	B	-0.0231139957904815
1	147700001	147800000	B	-0.0230275057256221	B	-0.0257185064256191	B	-0.0261511821299791	B	-0.0277931727468967	B	-0.0237714983522892	B	-0.0217124875634908	B	-0.0253670122474432
1	147800001	147900000	B	-0.0235130600631237	B	-0.0265259444713592	B	-0.0267403312027454	B	-0.0261146798729896	B	-0.0249884109944105	B	-0.0234607737511396	B	-0.0266512967646121
1	147900001	148000000	B	-0.0237755086272954	B	-0.025164671242237	B	-0.0272269397974014	B	-0.0290386844426393	B	-0.025836220011115	B	-0.023181777447462	B	-0.0267167594283819
1	148000001	148100000	B	-0.0234736818820238	B	-0.0260871723294258	B	-0.024978969246149	B	-0.0264118202030658	B	-0.0256073363125324	B	-0.0239887535572052	B	-0.0271441992372274
1	148100001	148200000	B	-0.0240848623216152	B	-0.0264644846320152	B	-0.028370963409543	B	-0.0284097902476787	B	-0.0260846223682165	B	-0.0236847940832376	B	-0.0269694272428751
1	148200001	148300000	B	-0.023542420938611	B	-0.0261382069438695	B	-0.0271540097892284	B	-0.0275624841451644	B	-0.0244411341845989	B	-0.0215797815471887	B	-0.0255690775811672
1	148300001	148400000	B	-0.0233005117624998	B	-0.0253835581243038	B	-0.0267555844038724	B	-0.0270108506083488	B	-0.0247905496507883	B	-0.021797202527523	B	-0.0252737030386924
1	148400001	148500000	B	-0.0239783320575952	B	-0.0267875511199235	B	-0.0272451043128967	B	-0.0270297713577747	B	-0.02352886646986	B	-0.0195640437304973	B	-0.0242774914950132
1	148500001	148600000	B	-0.0230557881295681	B	-0.0241718962788581	B	-0.0259609464555978	B	-0.0267060548067092	B	-0.023899408057332	B	-0.0214968807995319	B	-0.0236044209450483
1	148600001	148700000	B	-0.023301837965846	B	-0.0275713242590427	B	-0.0270953327417373	B	-0.028431449085474	B	-0.0209940895438194	B	-0.0229191333055496	B	-0.0201277919113636
1	148700001	148800000	B	-0.0226415898650884	B	-0.02382717654109	B	-0.0261851213872432	B	-0.0266596749424934	B	-0.0177401136606931	B	-0.0240909568965435	B	-0.0174741577357053
1	148800001	148900000	B	-0.0239517446607351	B	-0.0241813231259584	B	-0.0268316362053155	B	-0.0272725485265254	B	-0.0182206574827432	B	-0.0178507361561059	B	-0.0177929289638996
1	148900001	149000000	B	-0.0202209316194057	B	-0.0204270016402006	B	-0.025909025222063	B	-0.0271724332123994	B	-0.0161837376654148	B	-0.0216470547020435	B	-0.0143961459398269
1	149000001	149100000	B	-0.0210853349417448	B	-0.0226430390030145	B	-0.0249082930386066	B	-0.025419145822525	B	-0.0160993076860904	B	-0.0190370213240385	B	-0.015065461397171
1	149100001	149200000	B	-0.0238303560763597	B	-0.0263534281402826	B	-0.0272379480302333	B	-0.0278502479195594	B	-0.0171781331300735	B	-0.0219156853854656	B	-0.0181118268519639
1	149200001	149300000	B	-0.022826537489891	B	-0.0242517571896314	B	-0.0240419134497642	B	-0.0247492752969265	B	-0.0182546190917491	B	-0.0244013350456953	B	-0.019665777683258
1	149300001	149400000	B	-0.0251830164343118	B	-0.0245178025215864	B	-0.0218506902456283	B	-0.0255179423838853	B	-0.0196856372058391	B	-0.0236648768186569	B	-0.0203580800443887
1	149400001	149500000	B	-0.0263123027980327	B	-0.0268921963870525	B	-0.0267720967531204	B	-0.0282985791563987	B	-0.0239535216242074	B	-0.0247469414025545	B	-0.0236237477511167
1	149500001	149600000	B	-0.0245557017624378	B	-0.0252163894474506	B	-0.0269348490983247	B	-0.0278047230094671	B	-0.0236076060682535	B	-0.0256803203374147	B	-0.0230047740042209
1	149600001	149700000	B	-0.0260538086295127	B	-0.0281352885067462	B	-0.0269679389894008	B	-0.028972927480936	B	-0.0209769383072853	B	-0.0256035141646862	B	-0.0210468098521232
1	149700001	149800000	B	-0.0229496695101261	B	-0.0227226540446281	B	-0.0234011560678482	B	-0.0247357580810785	B	-0.0151843531057238	B	-0.0226308368146419	B	-0.014243297278881
1	149800001	149900000	B	-0.024096667766571	B	-0.0186438001692295	B	-0.0230976697057485	B	-0.025893710553646	B	-0.0148299867287278	B	-0.0173910465091466	B	-0.0170275829732418
1	149900001	150000000	B	-0.0221402235329151	B	-0.0133914276957511	B	-0.0251652356237173	B	-0.0271066091954708	B	-0.0196735374629497	B	-0.0177836399525403	B	-0.0237756315618753
1	150000001	150100000	B	-0.0253356378525495	B	-0.0247282199561595	B	-0.0275916997343301	B	-0.0310335885733366	B	-0.0206892061978578	B	-0.0149721251800656	B	-0.0255117043852806
1	150100001	150200000	B	-0.0260793045163154	B	-0.0275969095528125	B	-0.026835773140192	B	-0.0300376657396554	B	-0.0197912715375423	B	-0.0089664151892066	B	-0.0245315842330455
1	150200001	150300000	B	-0.0249442942440509	B	-0.0240343306213617	B	-0.0265781972557306	B	-0.028263546526432	B	-0.0200337450951337	B	-0.0136806350201368	B	-0.0226762555539608
1	150300001	150400000	B	-0.0190414171665906	B	-0.0155531074851751	B	-0.0165027510374784	B	-0.0189452245831489	B	-0.006414380390197	A	0.0084119690582156	B	-0.0121183386072516
1	150400001	150500000	B	-0.0016019698232412	A	0.0095229782164096	A	0.0067155878059566	A	0.0055223568342626	A	0.0111633613705635	A	0.0218271482735872	B	-0.0002817311906255
1	150500001	150600000	B	-0.0205056760460138	A	0.0030305627733469	B	-0.0019682352431118	B	-0.01015814114362	A	0.0022342880256474	A	0.0011529136681929	B	-0.0148346368223428
1	150600001	150700000	B	-0.0271975137293338	A	0.004522290546447	B	-0.0041550798341631	B	-0.0113446144387125	B	-0.0093375807628035	B	-0.0142610520124435	B	-0.0203378833830356
1	150700001	150800000	B	-0.026771442964673	A	0.0050682523287832	B	-0.0057727699168026	B	-0.0143362525850534	B	-0.007438511122018	B	-0.0192733965814113	B	-0.0193732250481843
1	150800001	150900000	B	-0.0262557808309793	A	0.007352857850492	B	-0.0031220389064401	B	-0.0154456561431288	B	-0.0065536210313439	B	-0.016458636149764	B	-0.0184325911104679
1	150900001	151000000	B	-0.0198814459145069	A	0.0138155305758118	A	0.0021684544626623	B	-0.0102111520245671	A	0.0009763186681084	B	-0.0080955047160387	B	-0.0140826040878891
1	151000001	151100000	A	0.0024596832226961	A	0.0235161818563938	A	0.0150776235386729	A	0.0053520314395427	A	0.0187462829053401	A	0.0189775079488754	B	-0.0007175630307756
1	151100001	151200000	A	0.0092810811474919	A	0.025698022916913	A	0.0158674493432045	A	0.0021336523350328	A	0.019573338329792	A	0.0225774236023426	B	-0.0013965208781883
1	151200001	151300000	A	0.009058753028512	A	0.0266014467924833	A	0.0172074437141418	A	0.0041231550276279	A	0.0188221428543329	A	0.0294113773852586	B	-0.0019965323153883
1	151300001	151400000	A	0.0137280793860554	A	0.0264515914022922	A	0.0231464635580778	A	0.013144290074706	A	0.0243296381086111	A	0.0324631631374359	A	0.0092324623838067
1	151400001	151500000	A	0.0219692010432481	A	0.0284536946564912	A	0.0262714009732007	A	0.0216507855802774	A	0.0260334964841604	A	0.0357595048844814	A	0.0144839212298393
1	151500001	151600000	A	0.0260258633643388	A	0.0299461986869573	A	0.0257352255284786	A	0.0161891281604766	A	0.0236842483282089	A	0.0354232266545295	A	0.0164610221982002
1	151600001	151700000	A	0.0270061586052179	A	0.0309318825602531	A	0.0273520611226558	A	0.0198488868772983	A	0.0233603361994028	A	0.0345810241997242	A	0.0186215173453092
1	151700001	151800000	A	0.028832709416747	A	0.0339177809655666	A	0.0318005457520484	A	0.0272936467081308	A	0.0303575061261653	A	0.0349591448903083	A	0.0224271770566701
1	151800001	151900000	A	0.0273275878280401	A	0.0287448540329933	A	0.0294399000704288	A	0.0247400421649217	A	0.030769508332014	A	0.0314449854195117	A	0.0282279681414365
1	151900001	152000000	A	0.0281626284122467	A	0.0304023660719394	A	0.0298717152327299	A	0.0257760621607303	A	0.0311686489731073	A	0.0257125180214643	A	0.0299330558627843
1	152000001	152100000	A	0.0288370884954929	A	0.031260497868061	A	0.03107625618577	A	0.0276973843574523	A	0.0321723595261573	A	0.0298561714589595	A	0.029899688437581
1	152100001	152200000	A	0.0253627635538578	A	0.0297788903117179	A	0.0288961306214332	A	0.0209158677607774	A	0.0298925712704658	A	0.0215095989406108	A	0.029336417093873
1	152200001	152300000	A	0.0237505491822958	A	0.0277296565473079	A	0.0280299670994281	A	0.0223994757980108	A	0.0266835317015647	A	0.0218683462589979	A	0.028830774128437
1	152300001	152400000	A	0.0251415092498064	A	0.0288967099040746	A	0.0291433669626712	A	0.0222182217985391	A	0.0284505244344472	A	0.0262250266969203	A	0.0282422751188278
1	152400001	152500000	A	0.0275889355689287	A	0.0315436571836471	A	0.0323419719934463	A	0.0272701997309923	A	0.0321496911346912	A	0.0255026891827583	A	0.029355376958847
1	152500001	152600000	A	0.0339977368712425	A	0.0334138199687004	A	0.0369493141770362	A	0.0345993712544441	A	0.0351015403866767	A	0.0333095341920852	A	0.0307683404535055
1	152600001	152700000	A	0.0342968329787254	A	0.0350415259599685	A	0.036469742655754	A	0.0355389975011348	A	0.0349949821829795	A	0.0342006087303161	A	0.030650433152914
1	152700001	152800000	A	0.0334362499415874	A	0.0338726937770843	A	0.0355139523744583	A	0.0331049785017967	A	0.03504054620862	A	0.0368003658950328	A	0.0304935593158006
1	152800001	152900000	A	0.0329608544707298	A	0.0349641889333725	A	0.0371560640633106	A	0.035138688981533	A	0.0338075496256351	A	0.0366045720875263	A	0.0293516777455806
1	152900001	153000000	A	0.0347472876310348	A	0.0335077345371246	A	0.0376565642654895	A	0.0360775552690029	A	0.0346999242901802	A	0.0361399427056312	A	0.0312488917261362
1	153000001	153100000	A	0.0342134796082973	A	0.0332223661243915	A	0.0361821204423904	A	0.0336037501692771	A	0.0352988056838512	A	0.036210048943758	A	0.031283862888813
1	153100001	153200000	A	0.0362456701695919	A	0.0347377993166446	A	0.0375081859529018	A	0.0372810214757919	A	0.0355586819350719	A	0.03668874502182	A	0.0310166757553815
1	153200001	153300000	A	0.0338172987103462	A	0.0328590124845504	A	0.0363668985664844	A	0.0342078991234302	A	0.0352351032197475	A	0.0365916788578033	A	0.0308431219309568
1	153300001	153400000	A	0.0337670072913169	A	0.0330338925123214	A	0.0354855880141258	A	0.0345435068011283	A	0.0349352583289146	A	0.0361673980951309	A	0.0309219863265752
1	153400001	153500000	A	0.0339984036982059	A	0.034035574644804	A	0.0368554443120956	A	0.0361582785844802	A	0.0325195118784904	A	0.0356297492980957	A	0.028024885803461
1	153500001	153600000	A	0.0342863872647285	A	0.0330948196351528	A	0.0363694205880165	A	0.0332113578915596	A	0.0355636551976203	A	0.037451647222042	A	0.0311502870172262
1	153600001	153700000	A	0.0353797301650047	A	0.0336579084396362	A	0.0352202877402305	A	0.0327564552426338	A	0.0353705249726772	A	0.036414235830307	A	0.0314989984035491
1	153700001	153800000	A	0.033359806984663	A	0.0316859818994998	A	0.0336151272058486	A	0.0286115370690822	A	0.0349608734250068	A	0.0345401689410209	A	0.0303154271095991
1	153800001	153900000	A	0.0288419350981712	A	0.0315545089542865	A	0.0283404178917408	A	0.024741057306528	A	0.0307498425245285	A	0.0270562246441841	A	0.0242430828511714
1	153900001	154000000	A	0.0316617786884307	A	0.0248271189630031	A	0.0267945528030395	A	0.018062861636281	A	0.0292426142841577	A	0.0269258022308349	A	0.017959602177143
1	154000001	154100000	A	0.0279675163328647	A	0.0219059828668832	A	0.0249634105712175	A	0.015311456285417	A	0.0254092123359441	A	0.0282771904021501	A	0.0136806908994913
1	154100001	154200000	A	0.0278667360544204	A	0.0242756828665733	A	0.0231991335749626	A	0.0160142369568347	A	0.0278186127543449	A	0.0261080525815486	A	0.0202263928949832
1	154200001	154300000	A	0.0189011208713054	A	0.0157840251922607	A	0.0170534662902355	A	0.0098954662680625	A	0.022727707400918	A	0.0082494113594293	A	0.0175259951502084
1	154300001	154400000	A	0.0160677134990692	A	0.0088600357994437	A	0.0124559365212917	A	0.0023414157330989	A	0.0108394892886281	B	-0.0085934856906533	A	0.0084267063066363
1	154400001	154500000	A	0.0207484550774097	A	0.0091891409829258	A	0.0136037925258278	A	0.007238021120429	A	0.0117355585098266	B	-0.0090587679296731	A	0.0112954657524824
1	154500001	154600000	A	0.0190671551972627	A	0.0099722780287265	A	0.0123611269518733	A	0.008062407374382	A	0.0125128636136651	B	-0.0099358055740594	A	0.0146016851067543
1	154600001	154700000	A	0.0181428082287311	A	0.0110037997364997	A	0.017459088936448	A	0.0086651192978024	A	0.0188456568866968	B	-0.0079783359542489	A	0.0192872155457735
1	154700001	154800000	A	0.0216941498219966	A	0.0193022452294826	A	0.0224223919212818	A	0.0159541778266429	A	0.0251933000981807	A	0.0075350818224251	A	0.0234276223927736
1	154800001	154900000	A	0.0282403603196144	A	0.0238300561904907	A	0.0253763273358345	A	0.0151756405830383	A	0.0297246500849723	A	0.0074466923251748	A	0.0291916672140359
1	154900001	155000000	A	0.0243294350802898	A	0.0229947213083505	A	0.0235278122127056	A	0.0149034447968006	A	0.027503352612257	A	0.0059781637974083	A	0.0276800151914358
1	155000001	155100000	A	0.0325268469750881	A	0.0295190531760454	A	0.0317745134234428	A	0.029230186715722	A	0.0338884927332401	A	0.0315379314124584	A	0.0318242721259593
1	155100001	155200000	A	0.034069500863552	A	0.0328184254467487	A	0.0349547713994979	A	0.0307439602911472	A	0.0347132980823516	A	0.0337736643850803	A	0.0325721427798271
1	155200001	155300000	A	0.0329614765942096	A	0.0299763530492782	A	0.0325761996209621	A	0.0269215069711208	A	0.0345175676047802	A	0.0309198554605245	A	0.0324104316532611
1	155300001	155400000	A	0.0321199484169483	A	0.0314908325672149	A	0.0301459953188896	A	0.022769683972001	A	0.0336342304944992	A	0.0242548380047082	A	0.0326799191534519
1	155400001	155500000	A	0.0335643216967582	A	0.0320333950221538	A	0.032033622264862	A	0.0265185460448265	A	0.0340495407581329	A	0.0283672474324703	A	0.0326045304536819
1	155500001	155600000	A	0.0308836307376623	A	0.029967401176691	A	0.0316133722662925	A	0.0266074854880571	A	0.0349026918411254	A	0.0300581865012645	A	0.0323540642857551
1	155600001	155700000	A	0.0331037268042564	A	0.0319722294807434	A	0.0330116860568523	A	0.0269920788705348	A	0.0334826298058033	A	0.02890563942492	A	0.0321546010673046
1	155700001	155800000	A	0.0328402109444141	A	0.0321135818958282	A	0.0344459153711795	A	0.0318537279963493	A	0.0342373102903366	A	0.0290991310030221	A	0.0321419909596443
1	155800001	155900000	A	0.0340645983815193	A	0.0337356850504875	A	0.035738106817007	A	0.0348046272993087	A	0.0336863249540329	A	0.0318908914923667	A	0.0258782487362623
1	155900001	156000000	A	0.0329317860305309	A	0.0329015925526618	A	0.0353688821196556	A	0.0362501442432403	A	0.0326922871172428	A	0.0341112278401851	A	0.024174390360713
1	156000001	156100000	A	0.0346037149429321	A	0.0334649719297885	A	0.035195592790842	A	0.0361365154385566	A	0.0347644165158271	A	0.0367449708282947	A	0.029005704447627
1	156100001	156200000	A	0.0269888453185558	A	0.0261858627200126	A	0.0289512295275926	A	0.0238573998212814	A	0.0326336808502674	A	0.029449300840497	A	0.0298345386981964
1	156200001	156300000	A	0.0312128737568855	A	0.0318773500621318	A	0.0343101732432842	A	0.0269972346723079	A	0.0342382751405239	A	0.034120287746191	A	0.0301536973565816
1	156300001	156400000	A	0.0317172780632972	A	0.0316154696047306	A	0.0308128874748945	A	0.0237500574439764	A	0.0305211711674928	A	0.0306491293013095	A	0.0248826183378696
1	156400001	156500000	A	0.0305740814656019	A	0.032434768974781	A	0.0324388965964317	A	0.0246926601976156	A	0.0341909304261207	A	0.0355782434344291	A	0.0280993487685918
1	156500001	156600000	A	0.0301898084580898	A	0.031229842454195	A	0.0301816016435623	A	0.0269194282591342	A	0.0337428078055381	A	0.0356898494064807	A	0.0292975027114152
1	156600001	156700000	A	0.0299461875110864	A	0.0322618037462234	A	0.0328228995203971	A	0.0282965414226055	A	0.035160556435585	A	0.0365689620375633	A	0.0310443677008152
1	156700001	156800000	A	0.0284373294562101	A	0.0285815075039863	A	0.0307585913687944	A	0.0270765293389558	A	0.0349296666681766	A	0.0346096605062484	A	0.0310782752931118
1	156800001	156900000	A	0.025077499449253	A	0.0255020298063755	A	0.0280739869922399	A	0.0216459296643733	A	0.033564418554306	A	0.0304617173969745	A	0.0319667682051658
1	156900001	157000000	A	0.02827725186944	A	0.0276207737624645	A	0.0284941736608743	A	0.0232208743691444	A	0.0340876542031765	A	0.033861119300127	A	0.0326607748866081
1	157000001	157100000	A	0.026823392137885	A	0.0270535256713628	A	0.0273675750941038	A	0.0178661923855543	A	0.033959936350584	A	0.0308535695075988	A	0.0326797030866146
1	157100001	157200000	A	0.0162512008100748	A	0.0172374304383993	A	0.0196253024041652	A	0.0097054243087768	A	0.0316701792180538	A	0.0158413667231798	A	0.0311643779277801
1	157200001	157300000	A	0.0122049832716584	A	0.0109351892024278	A	0.0106684127822518	A	0.0027715435717254	A	0.0293877050280571	A	0.0176709182560443	A	0.0289821233600378
1	157300001	157400000	A	0.0034442110918462	A	0.0103456582874059	A	0.0102783981710672	A	0.0019419705495238	A	0.0283477157354354	A	0.0213903654366731	A	0.0273457504808902
1	157400001	157500000	A	0.0082602063193917	A	0.0135299684479832	A	0.015819389373064	A	0.0077391909435391	A	0.0297638364136219	A	0.0227811355143785	A	0.0273260734975337
1	157500001	157600000	B	-0.0088559472933411	B	-0.0028682625852525	A	0.0027556780260056	B	-0.0033235361333936	A	0.0151243219152092	B	-0.0037109551485627	A	0.01445556525141
1	157600001	157700000	B	-0.0225099548697471	B	-0.0202538724988698	B	-0.0080991713330149	B	-0.0147959142923355	A	0.005097730550915	B	-0.0142307663336396	A	0.0121253412216901
1	157700001	157800000	B	-0.0214187018573284	B	-0.0193847585469484	B	-0.0083716642111539	B	-0.016899149864912	A	0.0085648288950324	B	-0.0172716602683067	A	0.014172269962728
1	157800001	157900000	B	-0.0267902109771966	B	-0.0240952484309673	B	-0.0159155018627643	B	-0.0216583255678415	A	0.0068202964030206	B	-0.0183567404747009	A	0.0157327521592378
1	157900001	158000000	B	-0.0258765555918216	B	-0.0224646534770727	B	-0.0141890095546841	B	-0.0221432298421859	A	0.0129231419414281	B	-0.0200043730437755	A	0.0192863997071981
1	158000001	158100000	B	-0.0269863959401845	B	-0.0226541701704263	B	-0.0114855356514453	B	-0.019288120791316	A	0.0135840410366654	B	-0.0187645014375448	A	0.0202066320925951
1	158100001	158200000	B	-0.022921971976757	B	-0.016921617090702	B	-0.0091358860954642	B	-0.0172158684581518	A	0.0202424097806215	B	-0.0187629163265228	A	0.0235875807702541
1	158200001	158300000	B	-0.0179204400628805	B	-0.0065492899157106	B	-0.0032576317898929	B	-0.0122583201155066	A	0.0232221651822328	B	-0.0091983871534466	A	0.0227149818092584
1	158300001	158400000	B	-0.0213248282670974	B	-0.0122599834576249	B	-0.0023049239534884	B	-0.00678626075387	A	0.02201490662992	B	-0.0038509252481162	A	0.0234344862401485
1	158400001	158500000	B	-0.0228178370743989	B	-0.0122240921482443	B	-0.0027448458131402	B	-0.012915869243443	A	0.0166605953127145	B	-0.0167913381010293	A	0.0232564844191074
1	158500001	158600000	B	-0.0210885945707559	B	-0.0102935312315821	B	-0.0058184117078781	B	-0.0105691747739911	A	0.0186126623302698	B	-0.0172040052711963	A	0.0214259773492813
1	158600001	158700000	B	-0.0163907073438167	B	-0.0061572487466037	B	-0.0081553468480706	B	-0.0107421642169356	A	0.0118451584130525	B	-0.0134075321257114	A	0.0129790781065821
1	158700001	158800000	B	-0.0245353486388921	B	-0.0115206018090248	B	-0.0109434761106967	B	-0.016366122290492	A	0.0030502416193485	B	-0.0181362554430961	B	-0.0020857432391494
1	158800001	158900000	B	-0.0234845336526632	B	-0.0172699056565761	B	-0.0129155796021223	B	-0.0203579906374216	B	-0.0026386112440377	B	-0.0185078978538513	B	-0.0071645868010818
1	158900001	159000000	B	-0.0223760306835174	B	-0.0096477661281824	B	-0.0117183411493897	B	-0.0153403310105204	A	0.0038179855328053	B	-0.0183269195258617	B	-0.0013409639941528
1	159000001	159100000	B	-0.0257556065917015	B	-0.0116425361484289	B	-0.0163979921489954	B	-0.0197362210601568	A	0.0006635047029703	B	-0.0171479638665914	B	-0.0047362721525132
1	159100001	159200000	B	-0.0230531357228755	B	-0.0128651428967714	B	-0.0134351085871458	B	-0.0176431983709335	A	0.0060428027063608	B	-0.0157685745507478	B	-0.0009028042550198
1	159200001	159300000	B	-0.0105792013928294	A	0.0098993284627795	A	0.0032621971331536	A	0.0009294856572523	A	0.0218652281910181	A	0.0139834582805633	A	0.0168965496122837
1	159300001	159400000	B	-0.0055472548119723	A	0.0118930600583553	A	0.0070132608525455	A	0.0020900038070976	A	0.0203281585127115	A	0.0134974662214517	A	0.0216655153781175
1	159400001	159500000	B	-0.0107899131253361	A	0.002298635430634	A	0.0013226746814325	B	-0.0078787421807646	A	0.0128014208748936	B	-0.0017418060451745	A	0.0252431407570838
1	159500001	159600000	B	-0.0093181375414133	A	0.0045943665318191	A	0.0045912754721939	B	-0.0047201444394886	A	0.0219613667577505	B	-0.0028466284275054	A	0.0291988737881183
1	159600001	159700000	B	-0.0064232219010591	A	0.0154840871691703	A	0.0087783643975853	B	-0.0046421089209616	A	0.0196696445345878	B	-0.0057983417063951	A	0.0300566796213388
1	159700001	159800000	B	-0.0087460847571492	A	0.0083983074873685	A	0.0072838282212615	B	-0.000753475993406	A	0.0187277160584926	B	-0.0074782883748412	A	0.0292791817337274
1	159800001	159900000	B	-0.0115872686728835	A	0.0041816048324108	A	0.0039628976956009	B	-0.0042404443956911	A	0.0195975843816995	B	-0.0031568827107548	A	0.0278275851160287
1	159900001	160000000	B	-0.0116235110908746	A	0.0101133035495877	B	-0.0007229815237224	B	-0.0094503331929445	A	0.0084564043208956	B	-0.0100354123860597	A	0.0238556880503892
1	160000001	160100000	B	-0.0066035198979079	A	0.0120130525901913	B	-0.0009543229243718	B	-0.0081762261688709	A	0.0082886451855301	B	-0.0031970785930752	A	0.0197796691209077
1	160100001	160200000	B	-0.0090857371687889	A	0.0057463557459414	A	0.0033405777066946	B	-0.001598248956725	A	0.0141610177233815	A	0.0113208424299955	A	0.0147406393662095
1	160200001	160300000	B	-0.0020016508642584	A	0.018025055527687	A	0.0064291595481336	A	0.0014490085886791	A	0.0230358112603425	A	0.0266262460500001	A	0.0217793751507997
1	160300001	160400000	B	-0.0098754419013857	A	0.0121496831998229	B	-0.0005465350695885	B	-0.008170741610229	A	0.0164399594068527	A	0.020953556522727	A	0.0186718646436929
1	160400001	160500000	B	-0.0141633711755275	A	0.0076183089986443	B	-0.0089801214635372	B	-0.0131238754838705	A	0.0081984857097268	A	0.0127996848896145	A	0.0081028724089264
1	160500001	160600000	B	-0.0171033143997192	A	0.0031411896925419	B	-0.0096750082448124	B	-0.0156392864882946	A	0.0124635566025972	A	0.0119590545073151	A	0.0121728032827377
1	160600001	160700000	B	-0.0184453558176755	A	0.005102090537548	B	-0.005323005374521	B	-0.0156212039291858	A	0.0047249463386833	A	0.0187482926994562	A	0.0069194827228784
1	160700001	160800000	B	-0.006218952126801	A	0.0147722493857145	A	0.0048483037389814	B	-0.0069532175548374	A	0.0137178003787994	A	0.025940952822566	A	0.0075027635321021
1	160800001	160900000	B	-0.0029018204659223	A	0.0152974519878625	A	0.0050946162082254	B	-0.0022508187685161	A	0.0165294464677572	A	0.0294150598347187	A	0.000830085540656
1	160900001	161000000	A	0.0099093224853277	A	0.0226591750979423	A	0.0176702104508876	A	0.0129413278773427	A	0.0257248654961586	A	0.0348993726074695	A	0.0133145619183778
1	161000001	161100000	A	0.0166448131203651	A	0.0238586068153381	A	0.0252710506319999	A	0.0217214245349168	A	0.0276904348284006	A	0.0346282236278057	A	0.0138041842728853
1	161100001	161200000	A	0.0079090278595685	A	0.0171261318027973	A	0.0180271212011575	A	0.0124783022329211	A	0.0237062834203243	A	0.0343484729528427	A	0.0023091416805982
1	161200001	161300000	B	-0.0050834747962653	A	0.0013777592685073	A	0.0086753480136394	A	0.0039049531333148	A	0.0162580832839012	A	0.0304981973022222	B	-0.0091533735394477
1	161300001	161400000	B	-0.0160473696887493	B	-0.0112949777394533	B	-0.0017701925244182	B	-0.0069777979515492	B	-0.0015392999630421	A	0.0124003868550062	B	-0.0218786299228668
1	161400001	161500000	B	-0.0157802589237689	B	-0.0061091026291251	B	-0.0067241680808365	B	-0.0074788024649024	B	-0.0002816685882862	B	-0.0012450072681531	B	-0.0228109844028949
1	161500001	161600000	B	-0.0216808468103408	B	-0.0114340325817465	B	-0.0086748544126749	B	-0.0145471254363656	B	-0.0083093699067831	B	-0.0069949650205671	B	-0.0246340446174144
1	161600001	161700000	B	-0.0180086083710193	B	-0.0109217222779989	B	-0.0079938359558582	B	-0.0086316810920834	B	-0.0035592659842222	B	-0.0001441214990336	B	-0.0223260577768087
1	161700001	161800000	B	-0.0015545840142294	A	0.0066407094709575	A	0.0063887699507176	A	0.0005564397433772	A	0.0094997454434633	A	0.0173356961458921	B	-0.0139210997149348
1	161800001	161900000	A	0.013847341760993	A	0.0182026904076337	A	0.0199511460959911	A	0.0124765140935778	A	0.0231979861855506	A	0.0290789660066366	A	0.0044690119102597
1	161900001	162000000	A	0.0130714895203709	A	0.0133204702287912	A	0.0183824971318244	A	0.012730018235743	A	0.0254710838198661	A	0.0248530302196741	A	0.0063444492407143
1	162000001	162100000	A	0.0132825337350368	A	0.0162743721157312	A	0.01887908577919	A	0.011069256812334	A	0.0249461866915226	A	0.0103281047195196	A	0.011263714171946
1	162100001	162200000	A	0.0115013094618916	A	0.0159851852804422	A	0.0182536952197551	A	0.0077636349014937	A	0.0262982733547687	A	0.0029010490979999	A	0.0125388391315937
1	162200001	162300000	A	0.0131496340036392	A	0.0193222369998693	A	0.0212355200201272	A	0.0137521382421255	A	0.0266300905495882	A	0.0017221551388502	A	0.0135307759046554
1	162300001	162400000	A	0.0056017241440713	A	0.0096837682649493	A	0.0186852943152189	A	0.0076761972159147	A	0.0236623957753181	A	0.00706297904253	A	0.0107992840930819
1	162400001	162500000	A	0.0046004932373762	A	0.0021990386303514	A	0.018098022788763	A	0.0079192258417606	A	0.0199861228466033	A	0.0098089585080742	A	0.0097234435379505
1	162500001	162600000	A	0.0108930077403783	A	0.0140780061483383	A	0.0226414483040571	A	0.0191617328673601	A	0.0266135726124048	A	0.0277502387762069	A	0.0139060346409678
1	162600001	162700000	A	0.0173230208456516	A	0.0159774534404277	A	0.0238918233662843	A	0.0210856068879365	A	0.0242567751556634	A	0.0284415408968925	A	0.0115229645743966
1	162700001	162800000	A	0.0068448893725872	B	-0.0026874803006649	A	0.0143764279782772	A	0.0137319695204496	A	0.0202099289745092	A	0.0224882904440164	A	0.0021225924137979
1	162800001	162900000	B	-0.0074488697573542	B	-0.022134555503726	B	-0.0009502373286522	B	-0.0054115271195769	A	0.0115688061341643	B	-0.0019819603767246	B	-0.0155491605401039
1	162900001	163000000	B	-0.0181134548038244	B	-0.0286075640469789	B	-0.0117285884916782	B	-0.0163873527199029	B	-0.0046694278717041	B	-0.0153080224990844	B	-0.0235731750726699
1	163000001	163100000	B	-0.0190659333020448	B	-0.0279698725789785	B	-0.0119625618681311	B	-0.0134393153712153	B	-0.0043703261762857	B	-0.0124196214601397	B	-0.0237578395754098
1	163100001	163200000	B	-0.0183090269565582	B	-0.0235829483717679	B	-0.0034775552339851	B	-0.0100117987021803	B	-0.0021120619494467	B	-0.0041674943640828	B	-0.0201636422425508
1	163200001	163300000	B	-0.0199472866952419	B	-0.0244779530912637	B	-0.0023186046164482	B	-0.0077727162279188	B	-0.0007622416014783	B	-0.0111243417486548	B	-0.0213191118091344
1	163300001	163400000	B	-0.0150534315034747	B	-0.0202633123844862	A	0.0014604580355808	B	-0.0018064577598124	A	0.0071626398712396	B	-0.0009189675329253	B	-0.0157086588442325
1	163400001	163500000	B	-0.0197481662034988	B	-0.0269227344542741	B	-0.00495609594509	B	-0.014169973321259	B	-0.0054551535286009	B	-0.0151564376428723	B	-0.0230473652482032
1	163500001	163600000	B	-0.0206454470753669	B	-0.0243018884211778	B	-0.0062921065837144	B	-0.0154165597632527	B	-0.0084130289033055	B	-0.0188511237502098	B	-0.0261153113096952
1	163600001	163700000	B	-0.02023814804852	B	-0.0242823120206594	B	-0.0069118337705731	B	-0.0127697084099054	B	-0.0046461019665002	B	-0.0146021489053964	B	-0.0237542036920785
1	163700001	163800000	B	-0.0191504582762718	B	-0.0214554276317358	B	-0.0061286562122404	B	-0.0109649132937192	B	-0.0013731088256463	B	-0.0116397598758339	B	-0.0207559838891029
1	163800001	163900000	B	-0.0146396104246377	B	-0.017707010731101	B	-0.0012073804391548	B	-0.0054987082257866	A	0.0043384009040892	A	0.0039963210001587	B	-0.0061047403141856
1	163900001	164000000	A	0.000674148381222	B	-0.0036011331249028	A	0.0112328408285975	A	0.006461048964411	A	0.0178951621055603	A	0.0262831393629312	B	-0.0004943722160533
1	164000001	164100000	B	-0.0004925343673676	B	-0.0092274257913231	A	0.0050698691047728	B	-0.0032641529105603	A	0.0060367207042872	A	0.0230595711618661	B	-0.019845750182867
1	164100001	164200000	A	0.004663597792387	B	-0.0066332211717963	A	0.008212860673666	A	8.90152e+08	A	0.0069132531061768	A	0.0216907933354377	B	-0.017373701557517
1	164200001	164300000	A	0.0177084449678659	A	0.0147428018972277	A	0.0159305837005376	A	0.0155049981549382	A	0.0242281984537839	A	0.0318177826702594	A	0.0065927538089454
1	164300001	164400000	A	0.0208307467401027	A	0.0182273816317319	A	0.012147051282227	A	0.0085391607135534	A	0.0242047347128391	A	0.0323332250118255	A	0.0188983231782913
1	164400001	164500000	A	0.0241285897791385	A	0.0177123043686151	A	0.011977270245552	A	0.0045242421329021	A	0.0251849666237831	A	0.0320625156164169	A	0.0213452503085136
1	164500001	164600000	A	0.0236080102622509	A	0.0203589852899312	A	0.0034466690849512	B	-0.0021742682438343	A	0.0198016539216041	A	0.0262899342924356	A	0.0192521847784519
1	164600001	164700000	A	0.0134469140321016	A	0.0091089978814125	B	-0.0023986573796719	B	-0.0097839962691068	A	0.0117620015516877	A	0.0094414334744215	A	0.0152462283149361
1	164700001	164800000	A	0.0156408362090587	A	0.0082076974213123	B	-0.0003492091491352	B	-0.0061064045876264	A	0.0120316119864583	A	0.0063713788986206	A	0.0170001443475484
1	164800001	164900000	A	0.017367884516716	A	0.0113863321021199	A	0.0049485019408166	B	-0.0011220301967114	A	0.0142785347998142	A	0.0051657953299582	A	0.0187426954507827
1	164900001	165000000	A	0.0156717784702777	A	0.0034400068689137	A	0.0057262722402811	B	-0.003119547618553	A	0.0155361164361238	A	0.0135421361774206	A	0.0187713224440813
1	165000001	165100000	A	0.0179334972053766	A	0.0071393391117453	A	0.0093004731461405	A	0.0028355685062706	A	0.0212861578911542	A	0.02138252556324	A	0.0231983438134193
1	165100001	165200000	A	0.0226233545690774	A	0.0174016952514648	A	0.014447446912527	A	0.0087106330320239	A	0.0238862186670303	A	0.0302224177867174	A	0.0157373826950788
1	165200001	165300000	A	0.0273206159472465	A	0.0263154413551092	A	0.0220604874193668	A	0.0183066930621862	A	0.0266235526651144	A	0.0326052606105804	A	0.0159126929938793
1	165300001	165400000	A	0.0246106889098882	A	0.0252087507396936	A	0.0173471663147211	A	0.0133584756404161	A	0.0206538438796997	A	0.0301924385130405	A	0.0085018901154398
1	165400001	165500000	A	0.0235067307949066	A	0.0260311309248209	A	0.0186015609651803	A	0.0130687011405825	A	0.0195366293191909	A	0.0298010054975748	A	0.0046096919104456
1	165500001	165600000	A	0.0263592265546321	A	0.0283887516707181	A	0.025858286768198	A	0.0160907804965972	A	0.0200813747942447	A	0.0315129607915878	A	0.0031684711575508
1	165600001	165700000	A	0.0303418710827827	A	0.0299350470304489	A	0.0314739942550659	A	0.0292463097721338	A	0.0293174553662538	A	0.0358787663280963	A	0.0188490897417068
1	165700001	165800000	A	0.0287018977105617	A	0.0282053761184215	A	0.0292355380952358	A	0.0274542216211557	A	0.0283218696713447	A	0.0336268693208694	A	0.0204005111008882
1	165800001	165900000	A	0.0253290515393018	A	0.0236770492047071	A	0.0256801843643188	A	0.0223740227520465	A	0.0296908058226108	A	0.0341757498681545	A	0.0250386353582143
1	165900001	166000000	A	0.0213315114378929	A	0.0224787984043359	A	0.0254469849169254	A	0.0202678311616182	A	0.0285736098885536	A	0.0332841053605079	A	0.0226668063551187
1	166000001	166100000	A	0.0164300967007875	A	0.0216975752264261	A	0.0240088962018489	A	0.018824890255928	A	0.0281569045037031	A	0.0303215701133012	A	0.0211838446557521
1	166100001	166200000	A	0.0149516994133591	A	0.0157870892435312	A	0.0214605368673801	A	0.0121086649596691	A	0.0232931841164827	A	0.0291938558220863	A	0.0144949434325099
1	166200001	166300000	A	0.0103652467951178	A	0.0163294728845357	A	0.0195746887475252	A	0.013310732319951	A	0.0227761473506689	A	0.0224346835166215	A	0.0119125256314873
1	166300001	166400000	A	0.0057384562678635	A	0.0133767835795879	A	0.0148807186633348	A	0.0117818126454949	A	0.0174485519528388	A	0.0126752136275172	A	0.0058914772234857
1	166400001	166500000	B	-0.0193260721862316	B	-0.0213907770812511	B	-0.0059552351012825	B	-0.010522493161261	B	-0.0228467732667922	B	-0.0105738118290901	B	-0.0292239803820848
1	166500001	166600000	B	-0.0228362623602151	B	-0.027623064815998	B	-0.0201923847198486	B	-0.0200660340487957	B	-0.0275819618254899	B	-0.0198871660977602	B	-0.0315982364118099
1	166600001	166700000	B	-0.0263283550739288	B	-0.0270450729876756	B	-0.0177714806050062	B	-0.0192996729165315	B	-0.028197556734085	B	-0.0209134425967931	B	-0.0320566929876804
1	166700001	166800000	B	-0.0190745573490858	B	-0.0183424651622772	B	-0.0050659324042499	B	-0.0079164924100041	B	-0.0236120745539665	B	-0.0143479872494935	B	-0.0304304491728544
1	166800001	166900000	B	-0.0178683307021856	B	-0.0127605563029646	B	-0.0019141846569254	B	-0.0077330437488853	B	-0.0166421551257371	B	-0.0049772565253078	B	-0.0248005781322717
1	166900001	167000000	B	-0.0176763497292995	B	-0.0192104093730449	A	0.002691461937502	B	-0.0043418379500508	B	-0.0158555880188941	A	0.0061498899012804	B	-0.0238123144954442
1	167000001	167100000	B	-0.0149689242243766	B	-0.0164452232420444	A	0.0101223327219486	A	0.0058740628883242	B	-0.0113085247576236	A	0.011796717531979	B	-0.0141697563230991
1	167100001	167200000	B	-0.0184969268739223	B	-0.0184428766369819	A	0.0088367518037557	A	0.001065309275873	B	-0.0161063987761735	A	0.0051405876874923	B	-0.0174200776964426
1	167200001	167300000	A	0.011080621741712	A	0.0101508665829896	A	0.0231086369603872	A	0.0219829380512237	A	0.013730363920331	A	0.0335287079215049	A	0.0010714461095631
1	167300001	167400000	A	0.0107319401577115	A	0.0133164636790752	A	0.0275903176516294	A	0.0247474107891321	A	0.0200484655797481	A	0.0352327898144722	A	0.0090168686583638
1	167400001	167500000	A	0.0066994586959481	B	-0.0015089198714122	A	0.0252442322671413	A	0.0173722822219133	A	0.0139768626540899	A	0.02935959585011	A	0.013760857284069
1	167500001	167600000	A	0.0064184409566223	B	-0.0019179029623046	A	0.0267826542258262	A	0.0205119848251342	A	0.0158313103020191	A	0.0285591911524534	A	0.0151582509279251
1	167600001	167700000	A	0.0070118848234415	A	0.0041895201429724	A	0.0282998867332935	A	0.0242324490100145	A	0.0213553942739963	A	0.0280114635825157	A	0.0165906175971031
1	167700001	167800000	A	0.0058501935563981	A	0.0049002785235643	A	0.0301530510187149	A	0.026337195187807	A	0.0248755794018507	A	0.0155934747308492	A	0.0217969790101051
1	167800001	167900000	A	0.0047888970002532	B	-0.0009698623907752	A	0.0273219663649797	A	0.0240181516855955	A	0.0202001053839921	A	0.0118629792705178	A	0.0194885917007923
1	167900001	168000000	B	-0.0062593361362814	B	-0.0099563570693135	A	0.0233587622642517	A	0.0210010856389999	A	0.0165369138121604	A	0.0064780078828334	A	0.0182439982891082
1	168000001	168100000	B	-0.0120202619582414	B	-0.009292303584516	A	0.0236546285450458	A	0.0186626724898815	A	0.0163351371884346	A	0.0002937937388196	A	0.0241482444107532
1	168100001	168200000	B	-0.0058171176351606	A	0.0011188626522198	A	0.0273663625121116	A	0.0268905218690633	A	0.0201929751783609	B	-0.001471399795264	A	0.0265085417777299
1	168200001	168300000	A	0.0044516613706946	A	0.0135807786136865	A	0.0279650129377841	A	0.0277569722384214	A	0.0235944390296936	A	0.0040622702799737	A	0.0275972560048103
1	168300001	168400000	A	0.0083542363718152	A	0.0209409147500991	A	0.0299973264336586	A	0.0289691295474767	A	0.0274415034800767	A	0.0138997538015246	A	0.0293304547667503
1	168400001	168500000	B	-0.0010035685263574	A	0.0112268114462494	A	0.0267543569207191	A	0.022377572953701	A	0.0250467751175165	A	0.0065960437059402	A	0.028036655858159
1	168500001	168600000	B	-0.0149239199236035	B	-0.0057121776044368	A	0.0222318340092897	A	0.0106891561299562	A	0.0170474834740161	B	-0.0135446405038237	A	0.0280813463032245
1	168600001	168700000	B	-0.017101090401411	B	-0.010688479989767	A	0.0168956127017736	A	0.0079225609079003	A	0.0138281416147947	B	-0.0137686673551797	A	0.0268968660384416
1	168700001	168800000	B	-0.0153813054785132	B	-0.0087361875921487	A	0.0200948901474475	A	0.0077784424647688	A	0.0149076832458376	B	-0.0149408765137195	A	0.0274593867361545
1	168800001	168900000	B	-0.0197379719465971	B	-0.014565740711987	A	0.0189613196998834	A	0.0055316588841378	A	0.0127717703580856	B	-0.0193790365010499	A	0.0276605710387229
1	168900001	169000000	B	-0.0207841657102108	B	-0.0170171242207288	A	0.0159856025129556	A	0.0050958832725882	A	0.0141659546643495	B	-0.0189176183193922	A	0.0275873094797134
1	169000001	169100000	B	-0.0174890980124473	B	-0.0119674047455191	A	0.0204465556889772	A	0.0081059541553258	A	0.0135808112099766	B	-0.019313495606184	A	0.0280562601983547
1	169100001	169200000	B	-0.0174906030297279	B	-0.0095439050346612	A	0.0190871525555849	A	0.0084720309823751	A	0.012811915948987	B	-0.0195629391819238	A	0.0268758106976747
1	169200001	169300000	B	-0.0182894151657819	B	-0.0098721040412783	A	0.0234844554215669	A	0.0134846651926636	A	0.0136043932288885	B	-0.0163624696433544	A	0.0270100105553865
1	169300001	169400000	B	-0.0130698457360267	B	-0.0074097248725593	A	0.0189425647258758	A	0.0133171742781996	A	0.0139899523928761	B	-0.0148369073867797	A	0.0236905347555875
1	169400001	169500000	B	-0.0132031105458736	B	-0.0075227706693112	A	0.0211814641952514	A	0.0126181077212095	A	0.0148585541173815	B	-0.0050549721345305	A	0.0199865419417619
1	169500001	169600000	B	-0.0193188190460205	B	-0.0141860749572515	A	0.0214030556380748	A	0.0174793750047683	A	0.0134286452084779	B	-0.0020286105573177	A	0.0045119798742234
1	169600001	169700000	B	-0.0208126585930585	B	-0.0169757883995771	A	0.0222100149840116	A	0.0143749713897705	A	0.0049784025177359	B	-0.0075092716142535	B	-0.0032293954864144
1	169700001	169800000	B	-0.0225475374609231	B	-0.0185971241444349	A	0.0203927792608737	A	0.0142526049166917	A	0.0024842645507305	B	-0.0130945844575762	B	-0.0007120938389562
1	169800001	169900000	B	-0.0243802610784769	B	-0.0195555966347455	A	0.0200164932757616	A	0.0118489414453506	A	0.0070175537839531	B	-0.0129751283675432	A	0.0029221021104604
1	169900001	170000000	B	-0.0152640417218208	B	-0.0064558968879282	A	0.0280430484563112	A	0.0219359081238508	A	0.0189626142382621	A	0.0073589887470006	A	0.0059947809204459
1	170000001	170100000	B	-0.018831992521882	B	-0.0065754288807511	A	0.0260847322642803	A	0.0206467360258102	A	0.0109512777999043	A	0.0076919049024581	B	-0.0046831085346639
1	170100001	170200000	B	-0.0037630486767739	A	0.0070503409951925	A	0.029068499803543	A	0.0275640171021223	A	0.0231398381292819	A	0.0213763993233442	A	0.0084851281717419
1	170200001	170300000	A	0.00971663556993	A	0.0211864151060581	A	0.0305707789957523	A	0.0262081380933523	A	0.0250643882900476	A	0.0202933382242918	A	0.0124145140871405
1	170300001	170400000	A	0.015642911195755	A	0.0265408847481012	A	0.0289704464375972	A	0.0294845290482044	A	0.0252168420702219	A	0.0089305331930518	A	0.0198028814047575
1	170400001	170500000	A	0.0205683596432209	A	0.0286539308726787	A	0.0317460373044014	A	0.0305275134742259	A	0.02699183113873	A	0.0116251157596707	A	0.022382827475667
1	170500001	170600000	A	0.0206621531397104	A	0.0282400641590356	A	0.0305949859321117	A	0.0284070596098899	A	0.0257222335785627	A	0.0156762599945068	A	0.0192314963787794
1	170600001	170700000	A	0.0203695278614759	A	0.0263633970171213	A	0.0299530383199453	A	0.0265270695090293	A	0.0251123290508985	A	0.0244703646749258	A	0.0099338795989751
1	170700001	170800000	A	0.0193829499185085	A	0.0284444075077772	A	0.0315545052289962	A	0.0297934282571077	A	0.0229481719434261	A	0.0289873871952295	A	0.0074341688305139
1	170800001	170900000	A	0.0240878984332084	A	0.03068065084517	A	0.0322490409016609	A	0.0337978154420852	A	0.0258527286350727	A	0.0350054316222667	A	0.0089895576238632
1	170900001	171000000	A	0.0301396790891885	A	0.0314270593225955	A	0.033659141510725	A	0.0305719692260026	A	0.0196517705917358	A	0.0354426242411136	B	-0.0070658414624631
1	171000001	171100000	A	0.0296301636844873	A	0.0317951142787933	A	0.0342545621097087	A	0.0335792154073715	A	0.025607855990529	A	0.0353083796799182	A	0.0070034055970609
1	171100001	171200000	A	0.0334945507347583	A	0.0315937027335166	A	0.0356077216565609	A	0.0368105582892894	A	0.0306893959641456	A	0.036201499402523	A	0.0160237066447734
1	171200001	171300000	A	0.0314678512513637	A	0.0302117969840765	A	0.0326944850385189	A	0.0345140397548675	A	0.0297630820423364	A	0.0359133891761302	A	0.016862528398633
1	171300001	171400000	A	0.0254506953060627	A	0.0273011792451143	A	0.0305792652070522	A	0.0308411084115505	A	0.0249051675200462	A	0.035836961120367	A	0.0052445880137383
1	171400001	171500000	A	0.0216412376612424	A	0.0221263188868761	A	0.0250693298876285	A	0.023003663867712	A	0.0179668311029672	A	0.035139363259077	B	-0.0051473956555128
1	171500001	171600000	B	-0.0162446536123752	B	-0.0255146715790033	B	-0.0121536320075392	B	-0.0096204103901982	B	-0.0244374070316553	A	0.0047404472716152	B	-0.0309184044599533
1	171600001	171700000	B	-0.0099808331578969	B	-0.0223444979637861	B	-0.0084098810330033	B	-0.0022237310186028	B	-0.0218241475522518	B	-0.0017040461534634	B	-0.0311063304543495
1	171700001	171800000	B	-0.0105413123965263	B	-0.0247290004044771	B	-0.0057646837085485	B	-0.0054115867242217	B	-0.018776886165142	B	-0.003030285006389	B	-0.0308588128536939
1	171800001	171900000	B	-0.0132480897009372	B	-0.0235164370387792	B	-0.0054634152911603	B	-0.0063537107780575	B	-0.0117719117552042	B	-0.0031932282727211	B	-0.0279104989022016
1	171900001	172000000	B	-0.009846425615251	B	-0.0217887479811906	A	0.0001463999215047	B	-0.0005866738501936	B	-0.0043424535542726	A	0.0092964293435215	B	-0.0220457017421722
1	172000001	172100000	A	0.0129360239952802	A	0.0117717655375599	A	0.0207414198666811	A	0.0172205325216054	A	0.0234802216291427	A	0.0332081913948059	A	0.0054641696624457
1	172100001	172200000	A	0.0221934840083122	A	0.0213547982275486	A	0.0238265842199325	A	0.0229447484016418	A	0.0257892161607742	A	0.0351040996611118	A	0.0125381713733077
1	172200001	172300000	A	0.0255406945943832	A	0.0215326976031065	A	0.02448589541018	A	0.0210491176694631	A	0.0286440514028072	A	0.0353553369641304	A	0.0159317217767238
1	172300001	172400000	A	0.0168541967868804	A	0.0148678068071603	A	0.0212388783693313	A	0.0206563230603933	A	0.0250757839530706	A	0.0345677882432937	A	0.0084655145183205
1	172400001	172500000	A	0.0069384193047881	A	0.0027953200042247	A	0.0121563300490379	A	0.0084665035828948	A	0.0136962076649069	A	0.0302469432353973	B	-0.0067297904752194
1	172500001	172600000	A	0.000345485197613	A	2.45755e+11	A	0.0082447566092014	A	0.0044127907603979	A	0.0134293809533119	A	0.0280351229012012	A	0.0023242358583956
1	172600001	172700000	B	-0.0192337334156036	B	-0.0169323422014713	B	-0.0059158615767955	B	-0.0094951344653964	B	-0.0045299255289137	A	0.0076017691753804	B	-0.0165484268218278
1	172700001	172800000	B	-0.0267312545329332	B	-0.0300652980804443	B	-0.0177066512405872	B	-0.0234817191958427	B	-0.017500365152955	B	-0.0093088243156671	B	-0.0264920648187398
1	172800001	172900000	B	-0.0294310953468084	B	-0.031070364639163	B	-0.0227067545056343	B	-0.024419717490673	B	-0.0217396840453147	B	-0.0196767579764127	B	-0.0309979375451803
1	172900001	173000000	B	-0.0305582340806722	B	-0.0337094590067863	B	-0.0242422427982091	B	-0.0261020269244909	B	-0.0245705544948577	B	-0.0188231021165847	B	-0.0318122208118438
1	173000001	173100000	B	-0.0310922134667634	B	-0.0321040228009223	B	-0.0248405374586582	B	-0.0264781694859266	B	-0.0258598085492849	B	-0.0205835942178964	B	-0.0325317457318306
1	173100001	173200000	B	-0.0286097936332225	B	-0.0312753170728683	B	-0.0229544844478368	B	-0.0236182324588298	B	-0.0258755572140216	B	-0.0193180684000253	B	-0.0326661132276058
1	173200001	173300000	B	-0.0296092275530099	B	-0.0315318405628204	B	-0.0241741575300693	B	-0.0265894960612058	B	-0.0240209754556417	B	-0.0164001360535621	B	-0.0323001965880394
1	173300001	173400000	B	-0.0213828757405281	B	-0.0218297522515058	B	-0.0110930865630507	B	-0.011887788772583	B	-0.0017208016943186	A	0.0024563176557421	B	-0.014058856293559
1	173400001	173500000	B	-0.0229358579963445	B	-0.0245524905622005	B	-0.0159511566162109	B	-0.0168454833328723	B	-0.0164991877973079	B	-0.0048835407942533	B	-0.0262272357940673
1	173500001	173600000	B	-0.0237098094075918	B	-0.0281481891870498	B	-0.0212813150137662	B	-0.0197555068880319	B	-0.0244230665266513	B	-0.0194297898560762	B	-0.0319231413304805
1	173600001	173700000	B	-0.0250786077231168	B	-0.0292936544865369	B	-0.0210088603198528	B	-0.0205247476696968	B	-0.0243925526738166	B	-0.0207953564822673	B	-0.0320225432515144
1	173700001	173800000	B	-0.0234804451465606	B	-0.0272616147994995	B	-0.018174659460783	B	-0.0188099779188632	B	-0.0239064302295446	B	-0.0200242213904857	B	-0.032241228967905
1	173800001	173900000	B	-0.023613778874278	B	-0.0263491999357938	B	-0.0182851459830999	B	-0.0181163772940635	B	-0.0219191536307334	B	-0.0165487751364707	B	-0.0317053012549877
1	173900001	174000000	B	-0.0256069675087928	B	-0.0337217077612876	B	-0.0213444903492927	B	-0.0197475552558898	B	-0.0249654408544302	B	-0.0195409245789051	B	-0.0325646214187145
1	174000001	174100000	B	-0.0247542858123779	B	-0.0298521909862756	B	-0.0218214280903339	B	-0.0200376529246568	B	-0.0253283213824033	B	-0.0181784518063068	B	-0.0324569456279277
1	174100001	174200000	B	-0.0259338282048702	B	-0.0299603529274463	B	-0.0214841980487108	B	-0.0211219880729913	B	-0.0230891983956098	B	-0.016061745584011	B	-0.0319539047777652
1	174200001	174300000	B	-0.0239950325340032	B	-0.0290332622826099	B	-0.0226255897432565	B	-0.0210944600403308	B	-0.0233548395335674	B	-0.0127559695392847	B	-0.0322638526558876
1	174300001	174400000	B	-0.0243465323001146	B	-0.0269204191863536	B	-0.01988778822124	B	-0.021324498578906	B	-0.0218884088099002	B	-0.0124068036675453	B	-0.0307250190526247
1	174400001	174500000	B	-0.0217789579182863	B	-0.0269359592348337	B	-0.0170875135809183	B	-0.0182272419333457	B	-0.0149577539414167	B	-0.0080402279272675	B	-0.0239181313663721
1	174500001	174600000	B	-0.0200813841074705	B	-0.0248401947319507	B	-0.0133173959329724	B	-0.0165436267852783	B	-0.0059172073379158	B	-0.0052655143663287	B	-0.0115948850288987
1	174600001	174700000	B	-0.019609922543168	B	-0.0221319012343883	B	-0.014153211377561	B	-0.0177266784012317	B	-0.0065345987677574	B	-0.0113432295620441	B	-0.0106720123440027
1	174700001	174800000	B	-0.0163378212600946	B	-0.0219859331846237	B	-0.0153416013345122	B	-0.0200479608029127	B	-0.0099402088671922	B	-0.0117963599041104	B	-0.0133285773918032
1	174800001	174900000	B	-0.0084533616900444	B	-0.0216002501547336	B	-0.0170712452381849	B	-0.0184674505144357	B	-0.0136440694332122	B	-0.0151397781446576	B	-0.0202166084200143
1	174900001	175000000	B	-0.0092213917523622	B	-0.0174670480191707	B	-0.0157062895596027	B	-0.0179816205054521	B	-0.0106553509831428	B	-0.0139246610924601	B	-0.0217029433697462
1	175000001	175100000	B	-0.0165422894060611	B	-0.0190786719322204	B	-0.013515836559236	B	-0.0136682903394103	B	-0.0066569088958203	B	-0.0098288422450423	B	-0.0137844737619161
1	175100001	175200000	B	-0.0228061266243457	B	-0.025229837745428	B	-0.0168627873063087	B	-0.0208421405404806	B	-0.0107686286792159	B	-0.0189565792679786	B	-0.0153455818071961
1	175200001	175300000	B	-0.0206401608884334	B	-0.0239376481622457	B	-0.0183157660067081	B	-0.0184209588915109	B	-0.0129221361130476	B	-0.0200099069625139	B	-0.0150013379752635
1	175300001	175400000	B	-0.0176848545670509	B	-0.0218695886433124	B	-0.0133350966498255	B	-0.0193612352013587	B	-0.0087307887151837	B	-0.0203482639044523	B	-0.0111975353211164
1	175400001	175500000	B	-0.0134238610044121	B	-0.0160338319838047	B	-0.01294288598001	B	-0.0162959657609462	B	-0.007785350549966	B	-0.0179633498191833	B	-0.008316995576024
1	175500001	175600000	B	-0.0116952266544103	B	-0.0103882579132914	B	-0.0100843757390975	B	-0.0126369893550872	B	-0.0098924813792109	B	-0.0147682726383209	B	-0.0138481399044394
1	175600001	175700000	B	-0.0101932249963283	B	-0.0089183989912271	B	-0.0052723619155585	B	-0.0084281293675303	A	0.0024094032123684	A	0.0036862418055534	B	-0.0062409052625298
1	175700001	175800000	B	-0.0196735244244337	B	-0.0163798965513706	B	-0.0153971845284104	B	-0.0193945318460464	B	-0.0130571806803345	B	-0.0043520894832909	B	-0.0204870346933603
1	175800001	175900000	B	-0.0172792766243219	B	-0.015415534377098	B	-0.0090942829847335	B	-0.0130642959848046	B	-0.0058904038742184	A	0.0045316028408706	B	-0.0167558304965496
1	175900001	176000000	B	-0.0169269572943449	B	-0.0103226481005549	B	-0.0067988503724336	B	-0.0122544420883059	B	-0.0004600518441293	A	0.0028369892388582	B	-0.0019235771615058
1	176000001	176100000	B	-0.0184033513069152	B	-0.0103377327322959	B	-0.0125193083658814	B	-0.0173070970922708	B	-0.0012428528862074	B	-0.0061220549978315	A	0.0020654459949582
1	176100001	176200000	B	-0.0233249887824058	B	-0.0065213730558753	B	-0.0141305197030305	B	-0.0186488647013902	B	-0.0054440405219793	B	-0.0091180400922894	B	-0.0008591442019678
1	176200001	176300000	B	-0.0217849481850862	B	-0.0034758672118186	B	-0.0139603568241	B	-0.0171066019684076	B	-0.0077963578514754	B	-0.0087976939976215	B	-0.0026742788031697
1	176300001	176400000	B	-0.0231225695461034	A	0.0016570190200582	B	-0.0184689536690711	B	-0.0217079445719718	B	-0.0163990650326013	B	-0.0137830143794417	B	-0.0097658680751919
1	176400001	176500000	B	-0.0248307790607213	A	0.00248190225102	B	-0.0163378193974494	B	-0.0220839790999889	B	-0.0171233601868152	B	-0.0173410754650831	B	-0.0104925734922289
1	176500001	176600000	B	-0.0232672113925218	B	-0.0072046881541609	B	-0.016878655180335	B	-0.019554590806365	B	-0.0157299097627401	B	-0.0188749879598617	B	-0.0109105007722973
1	176600001	176700000	B	-0.0222154185175895	B	-0.0087358020246028	B	-0.0120150530710816	B	-0.015151503495872	B	-0.0111418729647994	B	-0.0103720007464289	B	-0.0063623832538723
1	176700001	176800000	B	-0.0102854678407311	A	0.0053364699706435	A	0.0024098241701722	B	-0.0010339954169467	A	0.0144269941374659	A	0.0088349962607026	A	0.0138260088860988
1	176800001	176900000	B	-0.0044887303374707	A	0.0024176107253879	A	0.0066972700878977	A	0.005335462745279	A	0.018764428794384	A	0.009842132218182	A	0.0151616958901286
1	176900001	177000000	A	0.0004811815742868	B	-0.0080207968130707	A	0.0126736480742692	A	0.0026304190978407	A	0.0270575601607561	A	0.008175915107131	A	0.02382542937994
1	177000001	177100000	B	-0.0031191548332571	B	-0.0094976499676704	A	0.0124841406941413	A	0.0064456034451723	A	0.0275597050786018	A	0.0041955076158046	A	0.0249204486608505
1	177100001	177200000	B	-0.0048351883888244	B	-0.008735591545701	A	0.0114338835701346	A	0.0029663816094398	A	0.0262740440666675	A	0.0029923440888524	A	0.0235344488173723
1	177200001	177300000	B	-0.0011843267129734	B	-0.0098693603649735	A	0.013657396659255	A	0.0018617641180753	A	0.0266801360994577	A	0.0095787281170487	A	0.0218927226960659
1	177300001	177400000	A	0.0008340872009284	B	-0.0116590987890958	A	0.0163895785808563	A	0.0060686911456286	A	0.0275798309594392	A	0.0084643624722957	A	0.021427359431982
1	177400001	177500000	A	0.0065211094915866	B	-0.0086302598938345	A	0.0177132450044155	A	0.0039953882806003	A	0.0274990927428007	A	0.0116165438666939	A	0.0209937077015638
1	177500001	177600000	A	0.0067339376546442	B	-0.010589487850666	A	0.015276719816029	A	0.0061454991810023	A	0.0253742448985576	A	0.0057799760252237	A	0.0172511227428913
1	177600001	177700000	A	0.0061103538610041	B	-0.0098973913118243	A	0.0145084569230675	A	0.0027383847627788	A	0.0230563394725322	A	0.0122286807745695	A	0.0153653062880039
1	177700001	177800000	A	0.0016727297334	B	-0.0068447580561041	A	0.0160438772290945	A	0.0066148489713668	A	0.0158985294401645	A	0.0198678616434335	A	0.0075169703923165
1	177800001	177900000	B	-0.0032185551244765	B	-0.0190117675811052	A	0.0079973647370934	B	-0.0012881641741842	A	3.32116e+10	B	-0.0012261156225576	B	-0.0052066473290324
1	177900001	178000000	B	-0.0021700777579098	B	-0.0132068740203976	A	0.007061559241265	B	-0.0007731669466011	A	0.0032169304322451	B	-0.0020573623478412	B	-0.0008263794006779
1	178000001	178100000	B	-0.0050435443408787	B	-0.0194526240229606	A	0.0016273171640932	B	-0.0062054810114204	B	-0.0034243767149746	B	-0.0076702767983078	B	-0.0070893876254558
1	178100001	178200000	A	0.0057070078328251	B	-0.003155710408464	A	0.0066276425495743	A	0.0027687037363648	A	0.0078528448939323	B	-0.0009398419060744	A	0.0075937560759484
1	178200001	178300000	A	0.0101747438311576	A	0.0035851267166435	A	0.0150772733613848	A	0.0083928126841783	A	0.0124838026240468	A	0.0101611111313104	A	0.014521867968142
1	178300001	178400000	A	0.0243923924863338	A	0.0189030729234218	A	0.0244662370532751	A	0.0191598255187273	A	0.0273325555026531	A	0.0308866258710622	A	0.0223569218069314
1	178400001	178500000	A	0.0188556294888257	A	0.0132287368178367	A	0.0217148121446371	A	0.0153559818863868	A	0.0235400926321744	A	0.0250994842499494	A	0.0205253548920154
1	178500001	178600000	A	0.0199208632111549	A	0.0113943070173263	A	0.0268166828900575	A	0.021779078990221	A	0.0245842933654785	A	0.0206297915428876	A	0.0269548781216144
1	178600001	178700000	A	0.0229208525270223	A	0.0144826658070087	A	0.0278142001479864	A	0.0248473268002271	A	0.0258335527032613	A	0.0126053849235177	A	0.0290190614759922
1	178700001	178800000	A	0.0204684343189001	A	0.0138219529762864	A	0.0258939135819673	A	0.0247837416827678	A	0.0240648053586483	A	0.0086678052321076	A	0.0282404087483882
1	178800001	178900000	A	0.0222463198006153	A	0.01321751344949	A	0.0267506781965494	A	0.0200109425932168	A	0.0254218410700559	A	0.0079908985644578	A	0.0287093594670295
1	178900001	179000000	A	0.01918969117105	A	0.0107693392783403	A	0.0258130859583616	A	0.0208800043910741	A	0.0240338761359453	A	0.008775882422924	A	0.0282061416655778
1	179000001	179100000	A	0.0214193016290664	A	0.0133826378732919	A	0.0263518784195184	A	0.0216223075985908	A	0.0242868866771459	A	0.0129297096282243	A	0.0282408706843853
1	179100001	179200000	A	0.0206340700387954	A	0.0135894818231463	A	0.0249476842582225	A	0.0200818851590156	A	0.0253443159162998	A	0.0171973928809165	A	0.0281265210360288
1	179200001	179300000	A	0.0209516678005456	A	0.010453863069415	A	0.0229505971074104	A	0.0189729165285825	A	0.0240750834345817	A	0.0168996173888444	A	0.0274454560130834
1	179300001	179400000	A	0.0213725250214338	A	0.0075044427067041	A	0.0241173990070819	A	0.0202993787825107	A	0.0223165191709995	A	0.0190331619232893	A	0.0273760836571455
1	179400001	179500000	A	0.0217276103794574	A	0.0147998966276645	A	0.0282115973532199	A	0.0224462486803531	A	0.0257848091423511	A	0.0298842992633581	A	0.0257524941116571
1	179500001	179600000	A	0.0320351384580135	A	0.0293398033827543	A	0.0326447375118732	A	0.0322172492742538	A	0.0327991694211959	A	0.03516061976552	A	0.0275467690080404
1	179600001	179700000	A	0.0302529446780681	A	0.0284427553415298	A	0.0315385647118091	A	0.0297473240643739	A	0.0320945940911769	A	0.0342703349888324	A	0.02629298530519
1	179700001	179800000	A	0.0293278098106384	A	0.0288926716893911	A	0.0320612825453281	A	0.0284778103232383	A	0.0280759241431951	A	0.0317292809486389	A	0.0209702141582965
1	179800001	179900000	A	0.0320359915494918	A	0.0320929065346717	A	0.0311639588326215	A	0.0315513685345649	A	0.0322278514504432	A	0.0309575907886028	A	0.0259151887148618
1	179900001	180000000	A	0.0320802628993988	A	0.031777624040842	A	0.0291480813175439	A	0.0262962635606527	A	0.031570691615343	A	0.0303269047290086	A	0.0277277547866106
1	180000001	180100000	A	0.0277601648122072	A	0.0303280763328075	A	0.0267421808093786	A	0.0249157454818487	A	0.0301792919635772	A	0.0293019451200962	A	0.026984866708517
1	180100001	180200000	A	0.0313759036362171	A	0.0303173307329416	A	0.0295088477432727	A	0.0255411807447671	A	0.0323461554944515	A	0.0312663912773132	A	0.0274414625018835
1	180200001	180300000	A	0.0326908566057682	A	0.0323602780699729	A	0.031406931579113	A	0.0298145469278097	A	0.0329327955842018	A	0.0338824428617954	A	0.030038634315133
1	180300001	180400000	A	0.0329255647957325	A	0.0331641770899295	A	0.0327632464468479	A	0.0332162976264953	A	0.0329473726451396	A	0.0341160483658313	A	0.0307852439582347
1	180400001	180500000	A	0.031679693609476	A	0.0325291827321052	A	0.0323168560862541	A	0.0308140888810157	A	0.033273734152317	A	0.0339903160929679	A	0.0305260419845581
1	180500001	180600000	A	0.0325506478548049	A	0.0337641984224319	A	0.0323955751955509	A	0.0328152552247047	A	0.0325595289468765	A	0.0347216017544269	A	0.0293850153684616
1	180600001	180700000	A	0.0326543040573596	A	0.0326707176864147	A	0.0337043926119804	A	0.0339531041681766	A	0.0309434942901134	A	0.0342287942767143	A	0.0268480535596609
1	180700001	180800000	A	0.0332610644400119	A	0.03397698700428	A	0.0338368006050586	A	0.0351775251328945	A	0.0319738052785396	A	0.0345929525792598	A	0.0280651543289423
1	180800001	180900000	A	0.0341459140181541	A	0.0344375222921371	A	0.0344003625214099	A	0.0344058498740196	A	0.0326403193175792	A	0.0338073521852493	A	0.0287928208708763
1	180900001	181000000	A	0.0338435731828212	A	0.0341948680579662	A	0.0345344692468643	A	0.0371789894998073	A	0.0330940820276737	A	0.0340261794626712	A	0.0282949283719062
1	181000001	181100000	A	0.0319962687790393	A	0.0336229987442493	A	0.0330148972570896	A	0.0344616994261741	A	0.0318297483026981	A	0.0328645184636116	A	0.0257421527057886
1	181100001	181200000	A	0.0282350629568099	A	0.0297392699867486	A	0.030856380239129	A	0.0305797569453716	A	0.0282175689935684	A	0.0331683978438377	A	0.0207298584282398
1	181200001	181300000	A	0.0310244765132665	A	0.0336291231215	A	0.0306546166539192	A	0.0315258651971817	A	0.0329159125685691	A	0.0328480713069438	A	0.0266627557575702
1	181300001	181400000	A	0.0301615633070468	A	0.0288425255566835	A	0.029203051701188	A	0.0261949021369218	A	0.0305965617299079	A	0.0282240528613328	A	0.0283836163580417
1	181400001	181500000	A	0.0308195743709802	A	0.0297428052872419	A	0.0280422493815422	A	0.0272409413009881	A	0.029226878657937	A	0.0212314892560243	A	0.0286657288670539
1	181500001	181600000	A	0.0298885572701692	A	0.0283749923110008	A	0.0270768702030181	A	0.0264143273234367	A	0.0303148441016674	A	0.0249305330216884	A	0.0272860620170831
1	181600001	181700000	A	0.0284787379205226	A	0.0270335972309112	A	0.0280520413070917	A	0.0227945279330015	A	0.0290146432816982	A	0.028125625103712	A	0.0226796325296163
1	181700001	181800000	A	0.0291809942573308	A	0.0289365127682685	A	0.0294882282614707	A	0.0244488883763551	A	0.0286847651004791	A	0.0283006988465785	A	0.0212712995707988
1	181800001	181900000	A	0.0284853707998991	A	0.0296160820871591	A	0.0283856801688671	A	0.0270341429859399	A	0.0326409488916397	A	0.0334975235164165	A	0.0267154090106487
1	181900001	182000000	A	0.0285497922450304	A	0.030960090458393	A	0.0265701450407505	A	0.0254207886755466	A	0.0322587974369525	A	0.033076174557209	A	0.0295243859291076
1	182000001	182100000	A	0.0310802962630987	A	0.0326003544032573	A	0.0314147397875785	A	0.0293605830520391	A	0.032140415161848	A	0.0334801860153675	A	0.029666943475604
1	182100001	182200000	A	0.0238483306020498	A	0.0286028068512678	A	0.0275188442319631	A	0.0218283124268054	A	0.0306771397590637	A	0.032373808324337	A	0.0250289104878902
1	182200001	182300000	A	0.0285117160528898	A	0.0292757898569107	A	0.0248697809875011	A	0.0221348609775304	A	0.0296807028353214	A	0.0298939179629087	A	0.0232012532651424
1	182300001	182400000	A	0.0304365064948797	A	0.0323747918009758	A	0.030500192195177	A	0.0300195794552564	A	0.0327345542609691	A	0.0335694029927253	A	0.027894964441657
1	182400001	182500000	A	0.0306539162993431	A	0.0328801497817039	A	0.0309011526405811	A	0.0294973906129598	A	0.033014703541994	A	0.0337180718779563	A	0.0282737221568822
1	182500001	182600000	A	0.027798980474472	A	0.0304164439439773	A	0.02722111903131	A	0.0262840241193771	A	0.0329096652567386	A	0.0326097160577774	A	0.0304022915661335
1	182600001	182700000	A	0.0285867024213075	A	0.0302546210587024	A	0.0299576446413993	A	0.0245154406875371	A	0.0306571330875158	A	0.0259760748594999	A	0.0313945189118385
1	182700001	182800000	A	0.0286863390356302	A	0.0302678551524877	A	0.0286818537861108	A	0.0267176162451505	A	0.0309487339109182	A	0.0276258718222379	A	0.0314221046864986
1	182800001	182900000	A	0.0277086589485406	A	0.0283440165221691	A	0.0280114468187093	A	0.0260454881936311	A	0.0296763349324464	A	0.0259925834834575	A	0.0316815078258514
1	182900001	183000000	A	0.0287684723734855	A	0.030201319605112	A	0.0267368219792842	A	0.0263299886137247	A	0.0306792296469211	A	0.0266869775950908	A	0.0311987679451704
1	183000001	183100000	A	0.0220115166157484	A	0.0233729537576437	A	0.022742461413145	A	0.0195384453982114	A	0.0203479584306478	A	0.0078791584819555	A	0.0272827837616205
1	183100001	183200000	A	0.0300387926399707	A	0.0306843444705009	A	0.0288168955594301	A	0.0284338947385549	A	0.0310207288712263	A	0.0207872781902551	A	0.0309433192014694
1	183200001	183300000	A	0.0261417403817176	A	0.0294853579252958	A	0.0277647580951452	A	0.0254631619900465	A	0.0220981650054454	A	0.0067299781367182	A	0.0258086081594228
1	183300001	183400000	A	0.0280369985848665	A	0.0307900719344615	A	0.0247272886335849	A	0.0219762846827507	A	0.0301002562046051	A	0.032531339675188	A	0.0196462739259004
1	183400001	183500000	A	0.0100273359566926	A	0.0153483469039201	A	0.0043671540915966	A	0.0025725101586431	A	0.0141529692336916	A	0.0209529306739568	A	0.0038607472088187
1	183500001	183600000	A	0.0094865318387746	A	0.0137635860592126	A	0.0061783152632415	A	0.0057565215975046	B	-0.0003835649695247	B	-0.0044130370952188	B	-0.0151889100670814
1	183600001	183700000	A	0.012955323792994	A	0.0182399787008762	A	0.0076510575599968	A	0.0028179225046187	B	-0.005788801703602	B	-0.0087923975661396	B	-0.0214161910116672
1	183700001	183800000	A	0.0092432033270597	A	0.0081918258219957	A	0.0038687675260007	A	0.0027378415688872	B	-0.0038065530825406	B	-0.0101613895967602	B	-0.021249484270811
1	183800001	183900000	A	0.0064376476220786	A	0.0061523085460066	A	0.0047627398744225	B	-0.001616004272364	B	-0.0066553875803947	B	-0.0115536395460367	B	-0.0210630260407924
1	183900001	184000000	A	0.0083914408460259	A	0.0043026069179177	A	0.0060440814122557	B	-0.000632933108136	B	-0.0048742601647973	B	-0.0081074368208646	B	-0.0204114727675914
1	184000001	184100000	A	0.0132517572492361	A	0.0144396293908357	A	0.010044458322227	A	0.0033743903040885	A	0.0143659720197319	A	0.0067625595256686	B	-0.0011176428524777
1	184100001	184200000	A	0.0086714830249547	A	0.007945355027914	A	0.0055536264553666	A	0.0037250383757054	A	0.0019795496482402	B	-0.004757513757795	B	-0.0140415085479617
1	184200001	184300000	A	0.0083492174744606	A	0.010453944094479	A	0.0037165652029216	A	0.0007054537418298	A	0.0018739866791293	B	-0.0018329265294596	B	-0.0152996461838483
1	184300001	184400000	A	0.0101831648498773	A	0.0097523238509893	A	0.0073124780319631	A	0.0044079874642193	B	-0.0053416206501424	B	-0.0002436455833958	B	-0.0229291021823883
1	184400001	184500000	A	0.00937364064157	A	0.0078518809750676	A	0.0110242506489157	A	0.0057002278044819	A	0.0016276132082566	A	0.0085474550724029	B	-0.0201071854680776
1	184500001	184600000	A	0.0090413112193346	A	0.0033522476442158	A	0.0116081349551677	A	0.0052468739449977	B	-0.0001776935969246	A	0.0065743578597903	B	-0.0210862066596746
1	184600001	184700000	A	0.0096742920577526	A	0.0075222700834274	A	0.0213637761771678	A	0.0178751964122056	A	0.0012623228831216	A	0.0130247483029961	B	-0.0192114990204572
1	184700001	184800000	A	0.0193312782794237	A	0.0197938121855258	A	0.027662057429552	A	0.0234319940209388	A	0.0159240216016769	A	0.0249806717038154	B	-0.0023842388764023
1	184800001	184900000	A	0.028512418270111	A	0.0310790911316871	A	0.031192161142826	A	0.0306261926889419	A	0.0278266668319702	A	0.032955527305603	A	0.0150057254359126
1	184900001	185000000	A	0.0261648390442132	A	0.0261485166847705	A	0.0271160155534744	A	0.0240088552236557	A	0.02858167886734	A	0.0294469092041254	A	0.0191576387733221
1	185000001	185100000	A	0.0286328084766864	A	0.0303834397345781	A	0.0294753909111022	A	0.0270352642983198	A	0.0261773616075515	A	0.0276591628789901	A	0.0137398811057209
1	185100001	185200000	A	0.0260704737156629	A	0.0296375546604394	A	0.0264196954667568	A	0.0264448821544647	A	0.0264146048575639	A	0.0296140946447849	A	0.0134550472721457
1	185200001	185300000	A	0.0294968467205762	A	0.0315379090607166	A	0.0302385929971933	A	0.030347416177392	A	0.0310178343206644	A	0.0344254150986671	A	0.0196737851947546
1	185300001	185400000	A	0.0297308564186096	A	0.0277961194515228	A	0.0307085160166025	A	0.0284415278583765	A	0.0307908914983272	A	0.0329870097339153	A	0.0216815061867237
1	185400001	185500000	A	0.0281184073537588	A	0.0271131563931703	A	0.0311231613159179	A	0.028737748041749	A	0.0330509804189205	A	0.0313927046954631	A	0.0278045367449522
1	185500001	185600000	A	0.0204302389174699	A	0.0202633701264858	A	0.0214791614562273	A	0.0157783199101686	A	0.0254116654396057	A	0.0159759167581796	A	0.0250346586108207
1	185600001	185700000	A	0.0140116531401872	A	0.0154572334140539	A	0.0102808391675353	A	0.0043384823948144	A	0.0069425641559064	B	-0.0002241625334136	A	0.016145484521985
1	185700001	185800000	A	0.0137562053278088	A	0.011803776025772	A	0.0166441351175308	A	0.0074038365855813	A	0.0171201005578041	B	-0.0044012549333274	A	0.025165032595396
1	185800001	185900000	A	0.0121985273435711	A	0.0090693281963467	A	0.0171126723289489	A	0.0101202875375747	A	0.0172384101897478	B	-0.004850523546338	A	0.0251349881291389
1	185900001	186000000	A	0.0098604056984186	A	0.0035242189187556	A	0.0145238349214196	A	0.0073890225030481	A	0.0166349541395902	A	0.0004991905298084	A	0.0250959321856498
1	186000001	186100000	A	0.0089078852906823	A	0.0033012849744409	A	0.0148326968774199	A	0.0064235916361212	A	0.0177939776331186	B	-0.0019782830495387	A	0.0254562776535749
1	186100001	186200000	A	0.0124433394521474	A	0.0099822897464036	A	0.0144681148231029	A	0.0093855280429124	A	0.0226576998829841	A	0.0033048777841031	A	0.0282534956932067
1	186200001	186300000	A	0.0141947129741311	A	0.0157545339316129	A	0.0185051821172237	A	0.0085299089550971	A	0.0241849236190319	A	0.011221227236092	A	0.0280127972364425
1	186300001	186400000	A	0.0106375608593225	A	0.0126555655151605	A	0.0174114145338535	A	0.0116695193573832	A	0.0217134188860654	A	0.0025812026578933	A	0.0269977748394012
1	186400001	186500000	A	0.0146247744560241	A	0.0116490386426448	A	0.0187744572758674	A	0.011900526471436	A	0.025124005973339	A	0.0100304596126079	A	0.0294030159711837
1	186500001	186600000	A	0.0157979317009449	A	0.0093631343916058	A	0.0191933400928974	A	0.0132504310458898	A	0.0234032161533832	A	0.0141776474192738	A	0.0282443277537822
1	186600001	186700000	A	0.016106504946947	A	0.0123255271464586	A	0.0171410776674747	A	0.0120100798085331	A	0.025794144719839	A	0.0135655608028173	A	0.029154609888792
1	186700001	186800000	A	0.0139525849372148	A	0.0086746653541922	A	0.0177977867424488	A	0.0145722785964608	A	0.0261727701872587	A	0.0229438059031963	A	0.0264067593961954
1	186800001	186900000	A	0.00638527283445	B	-0.0032451953738927	A	0.0183569174259901	A	0.0100979749113321	A	0.0259411744773387	A	0.0131436875090003	A	0.0253287535160779
1	186900001	187000000	A	0.006748626474291	B	-0.0051209880039095	A	0.0189745854586362	A	0.0088325114920735	A	0.0280707888305187	A	0.0171784404665231	A	0.0290542673319578
1	187000001	187100000	A	0.0048314039595425	B	-0.0084653189405798	A	0.0139496307820081	A	0.0040739984251558	A	0.027111342176795	A	0.0040484773926436	A	0.0289687067270278
1	187100001	187200000	A	0.0069983256980776	B	-0.0060549271292984	A	0.0131470942869782	A	0.0047020921483635	A	0.0271854940801858	A	0.0091148307546973	A	0.0283190328627824
1	187200001	187300000	A	0.0147536741569638	A	0.0016823655460029	A	0.018550019711256	A	0.0112254684790968	A	0.0301385764032602	A	0.0186350978910923	A	0.0301522072404623
1	187300001	187400000	A	0.0135605540126562	B	-0.0005715332808904	A	0.0148683730512857	A	0.0109318252652883	A	0.0275985859334468	A	0.0111732659861445	A	0.0294541921466588
1	187400001	187500000	A	0.0092761134728789	B	-0.0084549495950341	A	0.0121233696117997	A	0.0060585471801459	A	0.0246313828974962	A	0.0028610718436539	A	0.0292372517287731
1	187500001	187600000	A	0.0072799427434802	B	-0.0058866925537586	A	0.015622166916728	A	0.0041825282387435	A	0.0253245569765567	B	-0.0031374937389045	A	0.0291498526930809
1	187600001	187700000	A	0.0120018906891345	A	0.0026505691930651	A	0.0174298081547021	A	0.0121979359537363	A	0.0279529560357332	A	0.0067932531237602	A	0.0302094351500272
1	187700001	187800000	A	0.0083169350400567	B	-0.0034761079587042	A	0.0157952290028333	A	0.0072651803493499	A	0.0270171407610178	A	0.0033381858374923	A	0.0301010850816965
1	187800001	187900000	A	0.0139708286151289	B	-0.0051848473958671	A	0.0151107748970389	A	0.0082034347578883	A	0.0282610077410936	A	0.0003300743701402	A	0.0302046872675418
1	187900001	188000000	A	0.0154968462884426	A	0.0010942118242383	A	0.0145579194650053	A	0.0076694744639098	A	0.0278359167277812	A	0.0029905571136623	A	0.0296883936971426
1	188000001	188100000	A	0.0078274952247738	B	-0.0003864070167765	A	0.0159079935401678	A	0.0091377478092908	A	0.0277630873024463	B	-0.0029752736445516	A	0.0296224895864725
1	188100001	188200000	A	0.0076169134117662	B	-0.0026000048965215	A	0.0163910705596208	A	0.0061560943722724	A	0.0273113213479518	B	-0.0081300185993313	A	0.030082494020462
1	188200001	188300000	A	0.0069970600306987	B	-0.0097598703578114	A	0.0107717523351311	A	0.0048640863969922	A	0.0250912811607122	B	-0.0099464617669582	A	0.029449488967657
1	188300001	188400000	A	0.0012297423090785	B	-0.0104779377579689	A	0.0110153490677475	A	0.0039452197961509	A	0.023704981431365	B	-0.0092394528910517	A	0.0287206079810857
1	188400001	188500000	A	0.0036317107733339	B	-0.0096676405519247	A	0.0123718762770295	A	0.0045494614169001	A	0.0223437305539846	B	-0.0112986117601394	A	0.0286755096167325
1	188500001	188600000	A	0.0017851297743618	B	-0.0113386800512671	A	0.0101809417828917	A	0.0040550366975367	A	0.0222223680466413	B	-0.0059753791429102	A	0.0282135941088199
1	188600001	188700000	A	0.0022593054454773	B	-0.0067164059728384	A	0.0106535917147994	A	0.0019301670836284	A	0.0247179046273231	A	0.0023099223617464	A	0.0264022573828697
1	188700001	188800000	A	0.0026245738845318	B	-0.0068566231057047	A	0.0117178652435541	A	0.0052345865406095	A	0.0253469329327344	B	-0.0002583031600806	A	0.0282367710024118
1	188800001	188900000	A	0.0086699798703193	B	-0.001862347475253	A	0.0173582155257463	A	0.0072372169233858	A	0.0268152393400669	A	0.0082824593409895	A	0.0269190054386854
1	188900001	189000000	A	0.0171049535274505	A	0.0139587623998522	A	0.0226762257516384	A	0.0153080634772777	A	0.0272842943668365	A	0.0065772258676588	A	0.0256931632757186
1	189000001	189100000	A	0.0243254993110895	A	0.0223607532680034	A	0.0210282113403081	A	0.017456728965044	A	0.0311034303158521	A	0.0211877804249525	A	0.0279948841780424
1	189100001	189200000	A	0.0258629992604255	A	0.0242609251290559	A	0.0202063657343387	A	0.0128508452326059	A	0.030673012137413	A	0.0088475616648793	A	0.0267344377934932
1	189200001	189300000	A	0.0240661930292844	A	0.0188466198742389	A	0.0169093143194913	A	0.0112036243081092	A	0.0295386966317892	A	0.0048445030115544	A	0.0265201739966869
1	189300001	189400000	A	0.0198035426437854	A	0.0205608028918504	A	0.0199273042380809	A	0.010597463697195	A	0.027972413226962	A	0.0006586468080058	A	0.0270739924162626
1	189400001	189500000	A	0.0201671309769153	A	0.0151493409648537	A	0.0191344562917947	A	0.0098817609250545	A	0.0263319872319698	B	-0.0022332824300974	A	0.0246545057743787
1	189500001	189600000	A	0.019479788839817	A	0.0149107109755277	A	0.0190027393400669	A	0.0102461278438568	A	0.02698715031147	A	0.0081914793699979	A	0.0243333037942647
1	189600001	189700000	A	0.0260453429073095	A	0.0231940485537052	A	0.0260267686098814	A	0.0231286250054836	A	0.031674887984991	A	0.0277581717818975	A	0.0277869049459695
1	189700001	189800000	A	0.0300040412694215	A	0.0288937427103519	A	0.0312145352363586	A	0.027144007384777	A	0.0340708792209625	A	0.0334548689424991	A	0.03136982396245
1	189800001	189900000	A	0.0278988517820835	A	0.0288040209561586	A	0.027929488569498	A	0.0231208261102437	A	0.0338457711040973	A	0.0324006453156471	A	0.0315650403499603
1	189900001	190000000	A	0.0281109102070331	A	0.0286007523536682	A	0.0270377062261104	A	0.022822318598628	A	0.0328213647007942	A	0.0280475206673145	A	0.0310052726417779
1	190000001	190100000	A	0.0292137954384088	A	0.0259407423436641	A	0.026886723935604	A	0.0215494781732559	A	0.0312828347086906	A	0.017997870221734	A	0.0307109262794256
1	190100001	190200000	A	0.0290539562702178	A	0.0260346364229917	A	0.0266876351088285	A	0.0250714961439371	A	0.0314739756286144	A	0.018863096833229	A	0.0308608990162611
1	190200001	190300000	A	0.0281011387705802	A	0.0261908397078514	A	0.0272781755775213	A	0.0225094575434923	A	0.0296018756926059	A	0.0085036363452672	A	0.0297929011285305
1	190300001	190400000	A	0.0263524651527404	A	0.0260507743805646	A	0.0231952015310525	A	0.0214557889848947	A	0.0295298155397176	A	0.0081166429445147	A	0.0294205155223608
1	190400001	190500000	A	0.0293616708368062	A	0.0264181233942508	A	0.024652536958456	A	0.0233654007315635	A	0.0293448772281408	A	0.016056690365076	A	0.0297849886119365
1	190500001	190600000	A	0.0275924205780029	A	0.0253169275820255	A	0.0254850480705499	A	0.0199465677142143	A	0.0294441021978855	A	0.0125959487631917	A	0.0299330502748489
1	190600001	190700000	A	0.0250893682241439	A	0.0250482000410556	A	0.0257865134626626	A	0.020899198949337	A	0.0300073958933353	A	0.0170764569193124	A	0.0300679747015237
1	190700001	190800000	A	0.026907455176115	A	0.0279938466846942	A	0.0255222208797931	A	0.0237451866269111	A	0.0313434265553951	A	0.0233669336885213	A	0.0304494462907314
1	190800001	190900000	A	0.0330084301531314	A	0.0319153256714344	A	0.0267205331474542	A	0.0302329063415527	A	0.0329832062125206	A	0.0316294878721237	A	0.0309145655483007
1	190900001	191000000	A	0.0348579250276088	A	0.0361057296395301	A	0.0340412892401218	A	0.0352430641651153	A	0.0338232778012752	A	0.0364124849438667	A	0.0298460330814123
1	191000001	191100000	A	0.0341905131936073	A	0.0347402654588222	A	0.0331963747739791	A	0.033938243985176	A	0.0334649421274662	A	0.0368628911674022	A	0.0297655314207077
1	191100001	191200000	A	0.0349774956703186	A	0.0349312536418437	A	0.0321927964687347	A	0.0343775525689125	A	0.0328169465065002	A	0.0358344167470932	A	0.0292166173458099
1	191200001	191300000	A	0.0338879898190498	A	0.0345291495323181	A	0.0342584960162639	A	0.0319482758641243	A	0.0331341810524463	A	0.0359607003629207	A	0.0295403394848108
1	191300001	191400000	A	0.0322957187891006	A	0.0333575084805488	A	0.0330561362206935	A	0.0309932958334684	A	0.0331925898790359	A	0.0368004254996776	A	0.028839623555541
1	191400001	191500000	A	0.0339985750615596	A	0.0336979776620864	A	0.0328040570020675	A	0.0340231321752071	A	0.0324547253549099	A	0.0360133573412895	A	0.0277672130614519
1	191500001	191600000	A	0.0310598723590374	A	0.0309183932840824	A	0.0304983742535114	A	0.0280996039509773	A	0.0320452973246574	A	0.0355026572942733	A	0.0273593459278345
1	191600001	191700000	A	0.0321485474705696	A	0.0319360643625259	A	0.0318807400763034	A	0.0286760702729225	A	0.0316139012575149	A	0.0340680070221424	A	0.026366289705038
1	191700001	191800000	A	0.0332109928131103	A	0.0328314341604709	A	0.030891204252839	A	0.0298329144716262	A	0.0318812280893325	A	0.0330691896378994	A	0.0271579511463642
1	191800001	191900000	A	0.032390858978033	A	0.0304309166967868	A	0.0305865760892629	A	0.023841843008995	A	0.0327757149934768	A	0.0353024154901504	A	0.0274096652865409
1	191900001	192000000	A	0.0318433530628681	A	0.0293708592653274	A	0.0273124556988477	A	0.0246955212205648	A	0.0314801521599292	A	0.032291006296873	A	0.0279297716915607
1	192000001	192100000	A	0.0220082737505435	A	0.0214721299707889	A	0.0188634693622589	A	0.0185594819486141	A	0.0287587195634841	A	0.0261862557381391	A	0.0270093157887458
1	192100001	192200000	A	0.0289229750633239	A	0.0283938869833946	A	0.0247297082096338	A	0.0209636483341455	A	0.02928320877254	A	0.0230090077966451	A	0.026655901223421
1	192200001	192300000	A	0.0294596180319786	A	0.0259839631617069	A	0.0197510812431573	A	0.018317038193345	A	0.0218624155968427	A	0.0119232423603534	A	0.0212996955960989
1	192300001	192400000	A	0.0298891831189394	A	0.0269446466118097	A	0.0216056313365697	A	0.0164461527019739	A	0.0211855582892894	A	0.0151071595028042	A	0.0209754798561334
1	192400001	192500000	A	0.0270023662596941	A	0.0258053597062826	A	0.0203635115176439	A	0.0150751499459147	A	0.0208912678062915	A	0.0185800995677709	A	0.0210385601967573
1	192500001	192600000	A	0.0282360631972551	A	0.0252958741039037	A	0.0198722910135984	A	0.0188142657279968	A	0.0214839596301317	A	0.0178559068590402	A	0.0224078949540853
1	192600001	192700000	A	0.027908407151699	A	0.0241678170859813	A	0.0214697942137718	A	0.0164457727223634	A	0.0237406883388757	A	0.012134208343923	A	0.023403700441122
1	192700001	192800000	A	0.0290157552808523	A	0.0281114373356103	A	0.0271682199090719	A	0.0228451266884803	A	0.0311021339148283	A	0.0286243297159671	A	0.0281570106744766
1	192800001	192900000	A	0.0315035656094551	A	0.030342761427164	A	0.0285198055207729	A	0.0276225339621305	A	0.031245432794094	A	0.0290617737919092	A	0.0287860725075006
1	192900001	193000000	A	0.0243071857839822	A	0.0230638515204191	A	0.0222371853888034	A	0.0178323648869991	A	0.0280266590416431	A	0.0207349564880132	A	0.0276840962469577
1	193000001	193100000	A	0.025929594412446	A	0.0251807998865842	A	0.0236569456756114	A	0.0219520106911659	A	0.0296111069619655	A	0.0265465732663869	A	0.027128878980875
1	193100001	193200000	A	0.0283770132809877	A	0.0293630491942167	A	0.0291510559618473	A	0.0267511326819658	A	0.0325355343520641	A	0.0313695706427097	A	0.0269471295177936
1	193200001	193300000	A	0.022540658712387	A	0.0273417979478836	A	0.0247212089598178	A	0.0239515732973814	A	0.0296141859143972	A	0.021954096853733	A	0.0245696250349283
1	193300001	193400000	A	0.0181677173823118	A	0.0258274432271718	A	0.0248537901788949	A	0.0181207787245512	A	0.029591217637062	A	0.0193505007773637	A	0.0237271357327699
1	193400001	193500000	A	0.0071289977058768	A	0.0174614191055297	A	0.0169294048100709	A	0.0119703747332096	A	0.0246764458715915	A	0.0118540050461888	A	0.0224672947078943
1	193500001	193600000	A	0.0005067701567895	A	0.0144779495894908	A	0.0160572547465562	A	0.0103440443053841	A	0.0248785559087991	A	0.0202257558703422	A	0.0238263718783855
1	193600001	193700000	B	-0.0050477823242545	A	0.0073041059076786	A	0.0148214446380734	A	0.0083131678402423	A	0.0209304615855216	A	0.0070642530918121	A	0.0244207363575696
1	193700001	193800000	B	-0.0173186175525188	A	0.0035700448788702	A	0.0073052737861871	B	-0.000270258373348	A	0.0169946197420358	B	-0.0072371042333543	A	0.0248177386820316
1	193800001	193900000	B	-0.0163482800126075	B	-0.0019385101040825	A	0.0043887579813599	B	-0.0045216460712254	A	0.0128549542278051	B	-0.0131088159978389	A	0.0249123871326446
1	193900001	194000000	B	-0.0165533442050218	B	-0.0029911743476986	A	0.0046959118917584	B	-0.0021973194088786	A	0.0135697331279516	B	-0.0122412368655204	A	0.0256416071206331
1	194000001	194100000	B	-0.0158482827246189	B	-0.0026387742254883	A	0.0049105039797723	B	-0.0022149144206196	A	0.0158717427402734	B	-0.0129069210961461	A	0.0252765379846096
1	194100001	194200000	B	-0.0159771740436553	B	-0.0001132892430177	A	0.0050146775320172	B	-0.0029506618157029	A	0.0161547251045703	B	-0.0128533570095896	A	0.0256281420588493
1	194200001	194300000	B	-0.0144649697467684	A	0.0104185417294502	A	0.0061216601170599	B	-0.000440143601736	A	0.0221189111471176	B	-0.0098984027281403	A	0.0256860684603452
1	194300001	194400000	B	-0.0138630252331495	A	0.0177518296986818	A	0.0055135553702712	A	0.0002571067016106	A	0.0198654551059007	B	-0.0114282872527837	A	0.0259913820773363
1	194400001	194500000	B	-0.0164439752697944	A	0.0128617733716964	A	0.0022064729128032	B	-0.0009523501503281	A	0.0168805085122585	B	-0.0091047976166009	A	0.0252888351678848
1	194500001	194600000	B	-0.0133083956316113	A	0.0162966474890708	A	0.0035394793376326	A	0.0005822989041917	A	0.0178822558373212	B	-0.0083148274570703	A	0.0256108064204454
1	194600001	194700000	B	-0.0008398155332542	A	0.0148052461445331	A	0.0131793608888983	A	0.0110114784911274	A	0.0251120403409004	B	-0.0030397039372473	A	0.0255189910531044
1	194700001	194800000	B	-0.0016983512323349	A	0.0154349021613597	A	0.0137227233499288	A	0.0127966497093439	A	0.0238188281655311	B	-0.0017885785782709	A	0.0247129369527101
1	194800001	194900000	B	-0.0099343415349721	A	0.003658422967419	A	0.006801975890994	B	-0.0002295615558978	A	0.0136652430519461	B	-0.0030390555039048	A	0.018819535151124
1	194900001	195000000	B	-0.0118235722184181	A	0.0005348441773094	A	0.0013446856755763	B	-0.0044951508753001	A	0.0088898334652185	A	0.0009512313990853	A	0.0103081678971648
1	195000001	195100000	B	-0.0164768323302268	B	-0.0087922941893339	B	-0.0036232459824532	B	-0.0084492210298776	B	-0.0025409057270735	A	0.0019807980861514	B	-0.0058801579289138
1	195100001	195200000	B	-0.0230635926127433	B	-0.0252858530730009	B	-0.0113489460200071	B	-0.0153089519590139	B	-0.0165501944720745	B	-0.0033395236823707	B	-0.0233595296740531
1	195200001	195300000	B	-0.0230637993663549	B	-0.0292539354413747	B	-0.015515161678195	B	-0.0162912011146545	B	-0.0264150071889162	B	-0.0156953688710927	B	-0.0302449222654104
1	195300001	195400000	B	-0.0183019861578941	B	-0.0234491061419248	B	-0.013785108923912	B	-0.013702617958188	A	-0.0	B	-0.0151170622557401	B	-0.0281078927218914
1	195400001	195471971	A	-0.0	A	-0.0	A	0.0	A	0.0	A	-0.0	A	-0.0	A	0.0
2	1	100000	A	-0.0	A	-0.0	A	0.0	A	-0.0	A	0.0	A	-0.0	A	-0.0
2	100001	200000	A	-0.0	A	-0.0	A	0.0	A	-0.0	A	0.0	A	-0.0	A	-0.0
2	200001	300000	A	-0.0	A	-0.0	A	0.0	A	-0.0	A	0.0	A	-0.0	A	-0.0
2	300001	400000	A	-0.0	A	-0.0	A	0.0	A	-0.0	A	0.0	A	-0.0	A	-0.0
2	400001	500000	A	-0.0	A	-0.0	A	0.0	A	-0.0	A	0.0	A	-0.0	A	-0.0
2	500001	600000	A	-0.0	A	-0.0	A	0.0	A	-0.0	A	0.0	A	-0.0	A	-0.0
2	600001	700000	A	-0.0	A	-0.0	A	0.0	A	-0.0	A	0.0	A	-0.0	A	-0.0
2	700001	800000	A	-0.0	A	-0.0	A	0.0	A	-0.0	A	0.0	A	-0.0	A	-0.0
2	800001	900000	A	-0.0	A	-0.0	A	0.0	A	-0.0	A	0.0	A	-0.0	A	-0.0
2	900001	1000000	A	-0.0	A	-0.0	A	0.0	A	-0.0	A	0.0	A	-0.0	A	-0.0
2	1000001	1100000	A	-0.0	A	-0.0	A	0.0	A	-0.0	A	0.0	A	-0.0	A	-0.0
2	1100001	1200000	A	-0.0	A	-0.0	A	0.0	A	-0.0	A	0.0	A	-0.0	A	-0.0
2	1200001	1300000	A	-0.0	A	-0.0	A	0.0	A	-0.0	A	0.0	A	-0.0	A	-0.0
2	1300001	1400000	A	-0.0	A	-0.0	A	0.0	A	-0.0	A	0.0	A	-0.0	A	-0.0
2	1400001	1500000	A	-0.0	A	-0.0	A	0.0	A	-0.0	A	0.0	A	-0.0	A	-0.0
2	1500001	1600000	A	-0.0	A	-0.0	A	0.0	A	-0.0	A	0.0	A	-0.0	A	-0.0
2	1600001	1700000	A	-0.0	A	-0.0	A	0.0	A	-0.0	A	0.0	A	-0.0	A	-0.0
2	1700001	1800000	A	-0.0	A	-0.0	A	0.0	A	-0.0	A	0.0	A	-0.0	A	-0.0
2	1800001	1900000	A	-0.0	A	-0.0	A	0.0	A	-0.0	A	0.0	A	-0.0	A	-0.0
2	1900001	2000000	A	-0.0	A	-0.0	A	0.0	A	-0.0	A	0.0	A	-0.0	A	-0.0
2	2000001	2100000	A	-0.0	A	-0.0	A	0.0	A	-0.0	A	0.0	A	-0.0	A	-0.0
2	2100001	2200000	A	-0.0	A	-0.0	A	0.0	A	-0.0	A	0.0	A	-0.0	A	-0.0
2	2200001	2300000	A	-0.0	A	-0.0	A	0.0	A	-0.0	A	0.0	A	-0.0	A	-0.0
2	2300001	2400000	A	-0.0	A	-0.0	A	0.0	A	-0.0	A	0.0	A	-0.0	A	-0.0
2	2400001	2500000	A	-0.0	A	-0.0	A	0.0	A	-0.0	A	0.0	A	-0.0	A	-0.0
2	2500001	2600000	A	-0.0	A	-0.0	A	0.0	A	-0.0	A	0.0	A	-0.0	A	-0.0
2	2600001	2700000	A	-0.0	A	-0.0	A	0.0	A	-0.0	A	0.0	A	-0.0	A	-0.0
2	2700001	2800000	A	-0.0	A	-0.0	A	0.0	A	-0.0	A	0.0	A	-0.0	A	-0.0
2	2800001	2900000	A	-0.0	A	-0.0	A	0.0	A	-0.0	A	0.0	A	-0.0	A	-0.0
2	2900001	3000000	A	-0.0	A	-0.0	A	0.0	A	-0.0	A	0.0	A	-0.0	A	-0.0
2	3000001	3100000	B	-0.0267992634326219	B	-0.0244730245321989	B	-0.0219166092574596	B	-0.0239846464246511	A	0.0	B	-0.0125908823683857	A	-0.0
2	3100001	3200000	B	-0.0271313022822141	B	-0.0269275270402431	B	-0.0185453761368989	B	-0.0202956870198249	B	-0.0251559540629386	B	-0.0076799122616648	B	-0.0213900040835142
2	3200001	3300000	B	-0.0235796328634023	B	-0.0229392573237419	B	-0.0137194879353046	B	-0.0166028421372175	B	-0.0229034554213285	A	0.0009068034705705	B	-0.0204282440245151
2	3300001	3400000	B	-0.0124014327302575	B	-0.0190983470529317	B	-0.0075932508334517	B	-0.0104610892012715	B	-0.0152467461302876	A	0.0095549076795578	B	-0.016175802797079
2	3400001	3500000	B	-0.0052425214089453	B	-0.0155079960823059	A	0.000752433494199	B	-0.0018929706420749	B	-0.0051166834309697	A	0.0173544213175773	B	-0.0096630807965993
2	3500001	3600000	B	-0.0098010580986738	B	-0.0236032623797655	B	-0.0015077095013111	B	-0.0072455499321222	B	-0.0084949806332588	A	0.0063838036730885	B	-0.0104402434080839
2	3600001	3700000	B	-0.0118933608755469	B	-0.0255145709961652	B	-0.0011766451643779	B	-0.0096639692783355	B	-0.0081571675837039	A	0.0003544595383573	B	-0.008700399659574
2	3700001	3800000	B	-0.0058196731843054	B	-0.0187725331634283	B	-0.001213933690451	B	-0.0010190440807491	B	-0.0009706389973871	A	0.0036308413837105	B	-0.0038732814136892
2	3800001	3900000	B	-0.0074197631329298	B	-0.0246905051171779	B	-0.0017175982939079	B	-0.0076527358032763	B	-0.0073772054165601	B	-0.0061257136985659	B	-0.005545811727643
2	3900001	4000000	B	-0.0073881773278117	B	-0.0246441531926393	B	-0.0012053644750267	B	-0.0068098749034106	B	-0.0036089238710701	B	-0.0088504832237958	B	-0.0019209840102121
2	4000001	4100000	B	-0.0069254101254045	B	-0.0261455196887254	A	0.0041077565401792	B	-0.0018592113628983	A	0.0019729216583073	B	-0.0099746659398078	A	0.0028667941223829
2	4100001	4200000	B	-0.002408675616607	B	-0.0254021827131509	A	0.0097943702712655	A	0.0033840911928564	A	0.0075749438256025	B	-0.0045970645733177	A	0.0069802184589207
2	4200001	4300000	A	0.0070043089799582	B	-0.0178187694400548	A	0.012454068288207	A	0.0082797361537814	A	0.0105295525863766	A	0.0019504751544445	A	0.0080675613135099
2	4300001	4400000	A	0.0083388648927211	B	-0.0149830551818013	A	0.0156910754740238	A	0.0134996492415666	A	0.011256605386734	A	0.0064275511540472	A	0.0094290869310498
[truncated: 22,640 more rows]
