# Supplementary material for: Chromatin spatial analysis by METALoci unveils sex-determining 3D regulatory hubs
Source: Nat Struct Mol Biol. 2026 Feb 24;33(4):577–89. doi: 10.1038/s41594-026-01749-z (PMC13095655; doi:10.1038/s41594-026-01749-z)
Supplement: Supplementary file 12 — LMI values for the Sox9 locus in male 10.5 and 13.5 samples and perturbation analysis for male 13.5. [file 41594_2026_1749_MOESM12_ESM.xlsx]

## Sheet: ED_Fig_3a_male_10.5
Chr	Start	End	Region	LDBindex	LDBx	LDBy	Signal	LMIpval	LMIq	LMItype	Geometry
11	110780000	114770000	11:110780000-114760000	1	0.52572	0.569467	-3.54719	0.331353	2	-0.110741	POLYGON ((0.5961313885387849 0.5684081471411065, 0.5867290159405125 0.5449811995867636, 0.5840351893779735 0.5391191433806953, 0.5807797523408609 0.5335493557537261, 0.5769940564674451 0.5283254768054593, 0.5727145600784587 0.5234978153458293, 0.5679824770635384 0.5191128643937607, 0.5628433799689377 0.5152128534239799, 0.5573467611089938 0.5118353416740887, 0.5515455559280855 0.5090128564285744,…
11	110780000	114770000	11:110780000-114760000	2	0.544524	0.616321	-1.50256	0.355353	4	-0.114387	POLYGON ((0.6141230323130819 0.6123747032423184, 0.605360912235527 0.5914044244461423, 0.5961313885387849 0.5684081471411065, 0.512396791566172 0.6020149103899842, 0.5149764692705864 0.6393524544941117, 0.5313522899845644 0.6469592307176073, 0.6141230323130819 0.6123747032423184))
11	110780000	114770000	11:110780000-114760000	3	0.562406	0.659118	-3.54719	0.195316	2	-0.264615	POLYGON ((0.5797592247581814 0.7229854724053562, 0.5797652626828804 0.7228745510422389, 0.5859928077232415 0.7204808361395457, 0.5919996293554045 0.7178202791132595, 0.5977109069296096 0.714573468635094, 0.603069602474078 0.7107728302844432, 0.6080221992193543 0.7064563206656165, 0.6125192360650596 0.7016670483389356, 0.6165158015430752 0.6964528432997491, 0.6199719823439906 0.690865779304937, 0.…
11	110780000	114770000	11:110780000-114760000	4	0.516437	0.676788	-2.01355	0.464491	1	0.00936842	POLYGON ((0.5313522899845644 0.6469592307176073, 0.5149764692705864 0.6393524544941117, 0.4972340379930131 0.6500562102530004, 0.4833104169841023 0.686499552408944, 0.4879059102764172 0.70043859376946, 0.5532761950545029 0.7039969782497111, 0.5313522899845644 0.6469592307176073))
11	110780000	114770000	11:110780000-114760000	5	0.513701	0.727047	-1.00072	0.472031	4	-0.05899	POLYGON ((0.5540872725841078 0.7837396958541231, 0.5673228577432902 0.7650786031707659, 0.5706478334680662 0.7598915966786802, 0.5734726075094319 0.7544160919955925, 0.5757723679526848 0.7487001842091653, 0.577526914435206 0.7427940800312861, 0.5787208355800046 0.7367496567983141, 0.5793436443643414 0.7306200067970952, 0.5797592247581814 0.7229854724053562, 0.5532761950545029 0.7039969782497111, …
11	110780000	114770000	11:110780000-114760000	6	0.48723	0.764369	-3.54719	0.448671	3	0.0526092	POLYGON ((0.4831251561927212 0.8299705183185678, 0.4833248322899013 0.8299925927048225, 0.4899832598987791 0.8300510012322871, 0.4966134403419183 0.8294355525584226, 0.5031473520302597 0.8281525608095396, 0.509517961033185 0.8262151886948972, 0.5156599088055733 0.8236433124653708, 0.5215101827264288 0.8204633179952963, 0.5270087625697653 0.8167078300795653, 0.5320992362753498 0.8124153777232195, …
11	110780000	114770000	11:110780000-114760000	7	0.444651	0.752946	-1.13295	0.0251995	4	-0.568588	POLYGON ((0.473984567213858 0.7286731499007673, 0.4268407870980122 0.7232702773512405, 0.4227358054573757 0.763180755271359, 0.4563487367533337 0.7944114253374215, 0.473984567213858 0.7286731499007673))
11	110780000	114770000	11:110780000-114760000	8	0.414137	0.785788	-3.54719	0.198296	3	0.197492	POLYGON ((0.3933405362501168 0.7717201796281663, 0.3901547879550492 0.8096254270935297, 0.4593016737065628 0.8044884214188506, 0.4563487367533337 0.7944114253374215, 0.4227358054573757 0.763180755271359, 0.3933405362501168 0.7717201796281663))
11	110780000	114770000	11:110780000-114760000	9	0.417396	0.829657	-3.54719	0.270535	3	0.178647	POLYGON ((0.4355820647826206 0.8962512088919179, 0.4532406889304627 0.8847652413527211, 0.4584151689692871 0.8810300021607799, 0.4632030899590615 0.8768106339510968, 0.467559331102729 0.8721468995470569, 0.4714428397026794 0.8670827494261267, 0.4748170180364813 0.8616659075357899, 0.4776500682494586 0.8559474215487514, 0.4799152920138852 0.8499811817957509, 0.4815913421308449 0.8438234134095054, …
11	110780000	114770000	11:110780000-114760000	10	0.382079	0.852629	-0.911293	1.99996e-05	4	-0.990883	POLYGON ((0.332031350910494 0.8952803839633868, 0.3330075575456668 0.8963754242500668, 0.3376871639294827 0.901117378181488, 0.3428226820260931 0.905361350009217, 0.3483613689853673 0.909063753250672, 0.3542463413282256 0.9121865634464675, 0.3604171591519233 0.9146977086796043, 0.3668104468605546 0.9165713989607968, 0.3733605440457411 0.917788391097083, 0.3800001798328253 0.9183361863234609, 0.38…
11	110780000	114770000	11:110780000-114760000	11	0.351861	0.818733	-3.54719	0.110358	3	0.25912	POLYGON ((0.3258264104419251 0.8723595372532854, 0.3854617530310415 0.8191958154848339, 0.3864472723038521 0.8132838358431594, 0.3106932982539462 0.7747438359656071, 0.3044244834160416 0.7821190083668224, 0.3037199575340138 0.7852308968992837, 0.3126486341891674 0.8552082178589021, 0.3258264104419251 0.8723595372532854))
11	110780000	114770000	11:110780000-114760000	12	0.370488	0.782119	-3.54719	0.0802984	3	0.284852	POLYGON ((0.3570405862700233 0.736012317402939, 0.3115496945301929 0.7724448953624069, 0.3106932982539462 0.7747438359656071, 0.3864472723038521 0.8132838358431594, 0.3901547879550492 0.8096254270935297, 0.3933405362501168 0.7717201796281663, 0.3570405862700233 0.736012317402939))
11	110780000	114770000	11:110780000-114760000	13	0.403363	0.7487	-3.54719	0.130657	3	0.243762	POLYGON ((0.3611643381549583 0.7258556465223436, 0.3570405862700233 0.736012317402939, 0.3933405362501168 0.7717201796281663, 0.4227358054573757 0.763180755271359, 0.4268407870980122 0.7232702773512405, 0.4255923817995328 0.7220905106284428, 0.3611643381549583 0.7258556465223436))
11	110780000	114770000	11:110780000-114760000	14	0.400415	0.698252	-3.54719	0.158097	3	0.206233	POLYGON ((0.3582189984304461 0.7085799969638601, 0.3611643381549583 0.7258556465223436, 0.4255923817995328 0.7220905106284428, 0.4257472789870977 0.6666752635133308, 0.418398791899893 0.6551040054428896, 0.3776916759576039 0.6544840612152811, 0.3582189984304461 0.7085799969638601))
11	110780000	114770000	11:110780000-114760000	15	0.450903	0.698393	-3.54719	0.403012	3	0.054788	POLYGON ((0.4753713611154343 0.7279095701854659, 0.4879059102764172 0.70043859376946, 0.4833104169841023 0.686499552408944, 0.4257472789870977 0.6666752635133308, 0.4255923817995328 0.7220905106284428, 0.4268407870980122 0.7232702773512405, 0.473984567213858 0.7286731499007673, 0.4753713611154343 0.7279095701854659))
11	110780000	114770000	11:110780000-114760000	16	0.465099	0.657173	-3.54719	0.411312	2	-0.041561	POLYGON ((0.4833104169841023 0.686499552408944, 0.4972340379930131 0.6500562102530004, 0.4477514908427932 0.6264540746322893, 0.4367825203751343 0.6296403522223261, 0.418398791899893 0.6551040054428896, 0.4257472789870977 0.6666752635133308, 0.4833104169841023 0.686499552408944))
11	110780000	114770000	11:110780000-114760000	17	0.482542	0.620604	-0.989686	0.329533	1	0.129381	POLYGON ((0.5149764692705864 0.6393524544941117, 0.512396791566172 0.6020149103899842, 0.4855607654754311 0.5793554910231885, 0.4477514908427932 0.6264540746322893, 0.4972340379930131 0.6500562102530004, 0.5149764692705864 0.6393524544941117))
11	110780000	114770000	11:110780000-114760000	18	0.445941	0.591222	-3.54719	0.257955	2	-0.13968	POLYGON ((0.4477514908427932 0.6264540746322893, 0.4855607654754311 0.5793554910231885, 0.4787397396684578 0.5543412157899984, 0.4143346216374506 0.5805331591660793, 0.4367825203751343 0.6296403522223261, 0.4477514908427932 0.6264540746322893))
11	110780000	114770000	11:110780000-114760000	19	0.401737	0.611428	-0.584469	0.322334	4	-0.189479	POLYGON ((0.4367825203751343 0.6296403522223261, 0.4143346216374506 0.5805331591660793, 0.4062742882644881 0.5768395414729941, 0.3953924653484057 0.5797421207843778, 0.3596908377146891 0.6344172437375069, 0.3776916759576039 0.6544840612152811, 0.418398791899893 0.6551040054428896, 0.4367825203751343 0.6296403522223261))
11	110780000	114770000	11:110780000-114760000	20	0.36383	0.586676	-3.54719	0.240195	3	0.144533	POLYGON ((0.3207518619267368 0.596396307099162, 0.3446264954641822 0.6289586770936304, 0.3596908377146891 0.6344172437375069, 0.3953924653484057 0.5797421207843778, 0.3426993079604226 0.5498924826173126, 0.3192739516616453 0.5819024481892094, 0.3207518619267368 0.596396307099162))
11	110780000	114770000	11:110780000-114760000	21	0.385113	0.549106	-1.11345	0.252815	4	-0.195347	POLYGON ((0.3437162544608915 0.5395274243322232, 0.3426993079604226 0.5498924826173126, 0.3953924653484057 0.5797421207843778, 0.4062742882644881 0.5768395414729941, 0.407890563900961 0.5349700058042574, 0.3891016890374662 0.5146592211145478, 0.3441376146326131 0.5388393461644788, 0.3437162544608915 0.5395274243322232))
11	110780000	114770000	11:110780000-114760000	22	0.429511	0.550819	-1.37767	0.412772	4	-0.0606929	POLYGON ((0.4787397396684578 0.5543412157899984, 0.4788986245343624 0.5535214878411409, 0.4491836831131072 0.528623980718523, 0.407890563900961 0.5349700058042574, 0.4062742882644881 0.5768395414729941, 0.4143346216374506 0.5805331591660793, 0.4787397396684578 0.5543412157899984))
11	110780000	114770000	11:110780000-114760000	23	0.423754	0.51336	-1.09606	0.394092	4	-0.0942417	POLYGON ((0.3891016890374662 0.5146592211145478, 0.407890563900961 0.5349700058042574, 0.4491836831131072 0.528623980718523, 0.4430688206757143 0.4950775548031612, 0.4180760107433107 0.4842433074142635, 0.3906958173399617 0.5073809160636544, 0.3891016890374662 0.5146592211145478))
11	110780000	114770000	11:110780000-114760000	24	0.467592	0.505369	-3.54719	0.247015	2	-0.171837	POLYGON ((0.5333020113401394 0.5041857803081999, 0.5332585042556156 0.5041788353464413, 0.5330632728363294 0.4994305851287791, 0.5321590698532336 0.4930060422739094, 0.5306260034958663 0.4867019133513218, 0.5284790054417894 0.4805795989781059, 0.5257389869076086 0.4746987289437452, 0.5224326349790261 0.4691165814310888, 0.5102404774871563 0.4506731846295404, 0.4430688206757143 0.4950775548031612,…
11	110780000	114770000	11:110780000-114760000	25	0.443208	0.468482	-3.54719	0.392332	2	-0.0988728	POLYGON ((0.5102404774871563 0.4506731846295404, 0.4980483199952865 0.4322297878279919, 0.4942054265090856 0.4269977672643783, 0.4898652469317294 0.4221702719758604, 0.4850701032590329 0.4177943758753389, 0.4798667539365466 0.4139127492378915, 0.4743059379082069 0.4105632426140256, 0.4684418798503167 0.4077785177410707, 0.462331761415423 0.4055857290517679, 0.4560351636421031 0.4040062588857367, …
11	110780000	114770000	11:110780000-114760000	26	0.390314	0.473789	-3.54719	0.410552	2	-0.0447167	POLYGON ((0.4101989721628181 0.4057241965766305, 0.3837519678703827 0.4083773605124875, 0.377631183439966 0.4092840540083974, 0.3716227566729587 0.4107621957217212, 0.3657799163465196 0.4127986907644096, 0.3601544243041011 0.4153754977847051, 0.3547961168962065 0.4184697887958512, 0.3497524634791288 0.4220541514097, 0.3336779758842589 0.4346570678984392, 0.3906958173399617 0.5073809160636544, 0.4…
11	110780000	114770000	11:110780000-114760000	27	0.358165	0.498995	-3.54719	0.48195	3	0.0290716	POLYGON ((0.3336779758842589 0.4346570678984392, 0.3301405754126993 0.4374305039079652, 0.3248881588479662 0.4384375190523456, 0.3441376146326131 0.5388393461644788, 0.3891016890374662 0.5146592211145478, 0.3906958173399617 0.5073809160636544, 0.3336779758842589 0.4346570678984392))
11	110780000	114770000	11:110780000-114760000	28	0.316368	0.507008	-3.54719	0.344553	3	0.120953	POLYGON ((0.3248881588479662 0.4384375190523456, 0.3039896921365505 0.4424442599902273, 0.2978487738023269 0.4439307788243407, 0.2918789230550141 0.4459999569912917, 0.2861352847945173 0.4486326810110733, 0.2806709143433854 0.4518046317995588, 0.2755362873624558 0.4554865093095377, 0.2707788335954357 0.4596443031820671, 0.2664424987493268 0.4642396069080681, 0.2625673385577086 0.469229972598183, …
11	110780000	114770000	11:110780000-114760000	29	0.301247	0.540877	-1.90493	0.315834	4	-0.0678196	POLYGON ((0.2858470292166196 0.5668378701343484, 0.3192739516616453 0.5819024481892094, 0.3426993079604226 0.5498924826173126, 0.3437162544608915 0.5395274243322232, 0.2661603694739162 0.5049028347394015, 0.2858470292166196 0.5668378701343484))
11	110780000	114770000	11:110780000-114760000	30	0.258284	0.554534	-3.54719	0.119558	3	0.320776	POLYGON ((0.2519699397013117 0.4875597128212287, 0.2383696269567329 0.4918827059008245, 0.23227553388805 0.4941574578423886, 0.2264360797360818 0.4970233332640485, 0.2209084367450425 0.5004522732881707, 0.2157467243149294 0.5044107062501177, 0.2110014791356351 0.5088598763877724, 0.2067191603982397 0.5137562232869173, 0.2029416949278005 0.5190518083674399, 0.1997060666911007 0.5246947842347713, 0…
11	110780000	114770000	11:110780000-114760000	31	0.276598	0.595571	-3.54719	0.0917982	3	0.296413	POLYGON ((0.2342461505726781 0.6450515329812136, 0.3207518619267368 0.596396307099162, 0.3192739516616453 0.5819024481892094, 0.2858470292166196 0.5668378701343484, 0.2194173307059793 0.5964848247399732, 0.2342461505726781 0.6450515329812136))
11	110780000	114770000	11:110780000-114760000	32	0.298526	0.634557	-3.54719	0.396552	3	0.0590907	POLYGON ((0.2342461505726781 0.6450515329812136, 0.2341736267053309 0.6463889181612754, 0.2958953767479195 0.6709583552600771, 0.3446264954641822 0.6289586770936304, 0.3207518619267368 0.596396307099162, 0.2342461505726781 0.6450515329812136))
11	110780000	114770000	11:110780000-114760000	33	0.332287	0.673728	-3.54719	0.164997	3	0.19808	POLYGON ((0.3446264954641822 0.6289586770936304, 0.2958953767479195 0.6709583552600771, 0.3011987949395431 0.6833414274603093, 0.3582189984304461 0.7085799969638601, 0.3776916759576039 0.6544840612152811, 0.3596908377146891 0.6344172437375069, 0.3446264954641822 0.6289586770936304))
11	110780000	114770000	11:110780000-114760000	34	0.314985	0.712817	-3.54719	0.0939981	3	0.270591	POLYGON ((0.3011987949395431 0.6833414274603093, 0.2873833781342254 0.7261816775214497, 0.3115496945301929 0.7724448953624069, 0.3570405862700233 0.736012317402939, 0.3611643381549583 0.7258556465223436, 0.3582189984304461 0.7085799969638601, 0.3011987949395431 0.6833414274603093))
11	110780000	114770000	11:110780000-114760000	35	0.27279	0.69921	-3.54719	0.0834383	3	0.283505	POLYGON ((0.2234252530870091 0.6636918498427001, 0.2452291402474502 0.7139912693384162, 0.2873833781342254 0.7261816775214497, 0.3011987949395431 0.6833414274603093, 0.2958953767479195 0.6709583552600771, 0.2341736267053309 0.6463889181612754, 0.2242734271112246 0.6604086786175725, 0.2234252530870091 0.6636918498427001))
11	110780000	114770000	11:110780000-114760000	36	0.260646	0.741202	-0.930967	0.0107798	4	-0.672906	POLYGON ((0.2452291402474502 0.7139912693384162, 0.2301404842619567 0.7535058267633095, 0.235483352679614 0.7630544455162095, 0.3044244834160416 0.7821190083668224, 0.3106932982539462 0.7747438359656071, 0.3115496945301929 0.7724448953624069, 0.2873833781342254 0.7261816775214497, 0.2452291402474502 0.7139912693384162))
11	110780000	114770000	11:110780000-114760000	37	0.2156	0.724	-3.54719	0.0834383	3	0.283505	POLYGON ((0.2234252530870091 0.6636918498427001, 0.1889290950841796 0.6978115997243167, 0.1817129065612265 0.7417571556762138, 0.2301404842619567 0.7535058267633095, 0.2452291402474502 0.7139912693384162, 0.2234252530870091 0.6636918498427001))
11	110780000	114770000	11:110780000-114760000	38	0.203696	0.773068	-3.54719	0.114838	3	0.234977	POLYGON ((0.2301404842619567 0.7535058267633095, 0.1817129065612265 0.7417571556762138, 0.1632075876779834 0.7569487161515381, 0.1452792693786818 0.7999725028466783, 0.1655300944157624 0.8042764371737215, 0.2193177704665822 0.7945068878749468, 0.235483352679614 0.7630544455162095, 0.2301404842619567 0.7535058267633095))
11	110780000	114770000	11:110780000-114760000	39	0.212233	0.82007	-3.54719	0.115938	3	0.234977	POLYGON ((0.219950668656677 0.8515458228626198, 0.234597487944977 0.8485145674046888, 0.2395344390596185 0.8213228405561619, 0.2193177704665822 0.7945068878749468, 0.1655300944157624 0.8042764371737215, 0.219950668656677 0.8515458228626198))
11	110780000	114770000	11:110780000-114760000	40	0.245844	0.794731	-3.54719	0.0960781	3	0.273056	POLYGON ((0.3044244834160416 0.7821190083668224, 0.235483352679614 0.7630544455162095, 0.2193177704665822 0.7945068878749468, 0.2395344390596185 0.8213228405561619, 0.3037199575340138 0.7852308968992837, 0.3044244834160416 0.7821190083668224))
11	110780000	114770000	11:110780000-114760000	41	0.265534	0.829748	-3.54719	0.157237	3	0.22522	POLYGON ((0.2464572277471053 0.8573785269081957, 0.3126486341891674 0.8552082178589021, 0.3037199575340138 0.7852308968992837, 0.2395344390596185 0.8213228405561619, 0.234597487944977 0.8485145674046888, 0.2464572277471053 0.8573785269081957))
11	110780000	114770000	11:110780000-114760000	42	0.267303	0.883701	-3.54719	0.207616	3	0.227921	POLYGON ((0.2460160058855856 0.9493388497594887, 0.2669875323838253 0.9494394702844451, 0.2735862879831532 0.9491392597824828, 0.2801216044170436 0.9481783534842039, 0.2865274984932768 0.9465664530873953, 0.2927392937199877 0.9443198329889892, 0.29869427330563 0.9414611759721833, 0.3043323133730144 0.9380193441919071, 0.3095964899942375 0.9340290877708587, 0.314433653917631 0.9295306939482404, 0.…
11	110780000	114770000	11:110780000-114760000	43	0.22536	0.883499	-3.54719	0.0466991	3	0.366175	POLYGON ((0.2367071401311329 0.9492941862029736, 0.2460160058855856 0.9493388497594887, 0.2464572277471053 0.8573785269081957, 0.234597487944977 0.8485145674046888, 0.219950668656677 0.8515458228626198, 0.1944892345547466 0.8787908327368517, 0.2367071401311329 0.9492941862029736))
11	110780000	114770000	11:110780000-114760000	44	0.187705	0.848309	-1.05676	0.0274595	4	-0.51567	POLYGON ((0.1452792693786818 0.7999725028466783, 0.1448503900504315 0.800226651021252, 0.1501369320797573 0.8532656579197552, 0.178217232441033 0.8778023367083785, 0.1944892345547466 0.8787908327368517, 0.219950668656677 0.8515458228626198, 0.1655300944157624 0.8042764371737215, 0.1452792693786818 0.7999725028466783))
11	110780000	114770000	11:110780000-114760000	45	0.184065	0.908227	-3.54719	0.147777	3	0.271224	POLYGON ((0.14923224956974 0.964283809964039, 0.1544328742897888 0.9669098644888361, 0.1603710868476191 0.9695485881980794, 0.1665407978414967 0.9715881708631658, 0.172881726125456 0.9730086847467242, 0.1793319176754228 0.9737962507213777, 0.1858283509108539 0.9739431738757239, 0.1923075524469324 0.9734480186974478, 0.1987062172611176 0.9723156230989909, 0.20496182721471 0.9705570511487395, 0.211…
11	110780000	114770000	11:110780000-114760000	46	0.150262	0.891159	-1.47837	0.00899982	4	-0.512541	POLYGON ((0.178217232441033 0.8778023367083785, 0.1501369320797573 0.8532656579197552, 0.1254211347137356 0.8797969474141525, 0.1502304805887795 0.9332271544881788, 0.178217232441033 0.8778023367083785))
11	110780000	114770000	11:110780000-114760000	47	0.118072	0.906106	-3.54719	0.0687586	3	0.340855	POLYGON ((0.09539236788307864 0.9677799140338922, 0.101026592795427 0.969597521698667, 0.1074223762709994 0.9709774028372786, 0.1139236486916453 0.9717146783187987, 0.1204660095284203 0.9718020448142918, 0.1269846512373279 0.9712386368857084, 0.1334150012321283 0.9700300355587718, 0.1396933615296929 0.9681882130382597, 0.1457575397316873 0.9657314141133257, 0.1490611803751813 0.9641974286047587, …
11	110780000	114770000	11:110780000-114760000	48	0.11233	0.855822	-3.54719	0.00557989	3	0.445301	POLYGON ((0.1341976723377322 0.7992258482047024, 0.08450954614906114 0.8500378722862602, 0.1040245408039323 0.8822400608040256, 0.1254211347137356 0.8797969474141525, 0.1501369320797573 0.8532656579197552, 0.1448503900504315 0.800226651021252, 0.1341976723377322 0.7992258482047024))
11	110780000	114770000	11:110780000-114760000	49	0.076762	0.877377	-3.54719	0.122058	3	0.226873	POLYGON ((0.04751708060698746 0.8719327039129524, 0.05182495629045659 0.890428351359946, 0.08455836973121988 0.9102302256724067, 0.1040245408039323 0.8822400608040256, 0.08450954614906114 0.8500378722862602, 0.0694247516471511 0.8496697275914589, 0.04751708060698746 0.8719327039129524))
11	110780000	114770000	11:110780000-114760000	50	0.0518396	0.918574	-3.54719	0.103038	3	0.308162	POLYGON ((-0.009275852264213128 0.9500803784411489, 0.004800297782492809 0.9644983989389234, 0.009419203263310534 0.9687961095847036, 0.01442881725402527 0.9726312591645265, 0.01978299926270898 0.9759685244601642, 0.0254324351920657 0.9787771679611579, 0.03132509154143454 0.9810313209692351, 0.03740669465555443 0.9827102218590757, 0.04362123060602351 0.9837984073009503, 0.04991146110135048 0.9842…
11	110780000	114770000	11:110780000-114760000	51	0.0236873	0.889738	-3.54719	0.0685386	3	0.337346	POLYGON ((-0.0190796172186421 0.9400385073613929, -0.009275852264213128 0.9500803784411489, 0.05182495629045659 0.890428351359946, 0.04751708060698746 0.8719327039129524, 0.01262912801112985 0.8586221047597051, 0.002032084022742998 0.8632434614006451, -0.0190796172186421 0.9400385073613929))
11	110780000	114770000	11:110780000-114760000	52	0.0416034	0.842779	-3.54719	0.0198596	3	0.362544	POLYGON ((0.01262912801112985 0.8586221047597051, 0.04751708060698746 0.8719327039129524, 0.0694247516471511 0.8496697275914589, 0.04813169636521965 0.811617826280862, 0.02767795333260252 0.8090452992020168, 0.01262912801112985 0.8586221047597051))
11	110780000	114770000	11:110780000-114760000	53	0.0781048	0.822354	-3.54719	0.0424792	3	0.300877	POLYGON ((0.05932857254316455 0.8040954891227047, 0.04813169636521965 0.811617826280862, 0.0694247516471511 0.8496697275914589, 0.08450954614906114 0.8500378722862602, 0.1341976723377322 0.7992258482047024, 0.119891290717167 0.7914255155282189, 0.05932857254316455 0.8040954891227047))
11	110780000	114770000	11:110780000-114760000	54	0.0495232	0.77981	-3.54719	0.0168197	3	0.408822	POLYGON ((0.05940998388058125 0.7528733373930533, 0.0510644540945846 0.7470430809110497, 0.02575362270159924 0.7945993839738251, 0.02660364928601619 0.8079138101467446, 0.02767795333260252 0.8090452992020168, 0.04813169636521965 0.811617826280862, 0.05932857254316455 0.8040954891227047, 0.05940998388058125 0.7528733373930533))
11	110780000	114770000	11:110780000-114760000	55	0.000296388	0.782953	-0.984998	0.00365993	4	-0.77819	POLYGON ((0.02575362270159924 0.7945993839738251, -0.009590888225952764 0.7416839061595798, -0.01537102033546767 0.8052484282852028, 0.02660364928601619 0.8079138101467446, 0.02575362270159924 0.7945993839738251))
11	110780000	114770000	11:110780000-114760000	56	-0.00264957	0.829346	-3.54719	0.0215196	3	0.397782	POLYGON ((-0.02712371855705701 0.8110486658037962, -0.01623758285354832 0.8522356195522772, 0.002032084022742998 0.8632434614006451, 0.01262912801112985 0.8586221047597051, 0.02767795333260252 0.8090452992020168, 0.02660364928601619 0.8079138101467446, -0.01537102033546767 0.8052484282852028, -0.02712371855705701 0.8110486658037962))
11	110780000	114770000	11:110780000-114760000	57	-0.0301238	0.874945	-1.03103	0.0591988	4	-0.627832	POLYGON ((-0.09642284755735663 0.8810941521121833, -0.09378940423534898 0.8913280296518846, -0.09188523982418989 0.8974669886141911, -0.0893906768640628 0.903390654276901, -0.08632956172414148 0.9090424003208906, -0.08273115663708022 0.9143681997984355, -0.07862985997145674 0.9193171415950374, -0.07406487740615865 0.9238419171059475, -0.06907984715006817 0.9278992724750851, -0.06372242278969693 0…
11	110780000	114770000	11:110780000-114760000	58	-0.0393607	0.839049	-3.54719	0.099158	3	0.309143	POLYGON ((-0.03916126636916645 0.8084583166501883, -0.07726264501325231 0.86793895797861, -0.01623758285354832 0.8522356195522772, -0.02712371855705701 0.8110486658037962, -0.03916126636916645 0.8084583166501883))
11	110780000	114770000	11:110780000-114760000	59	-0.0668668	0.82143	-3.54719	0.49115	2	-0.0010914	POLYGON ((-0.09377211057590562 0.7549550743382457, -0.1138255326352472 0.7754236340100068, -0.1181296102534604 0.7802738070507951, -0.1219349118643601 0.7855244205691634, -0.1252044127198394 0.7911243872498864, -0.1279063012953498 0.7970192206482714, -0.1300142888090414 0.8031515653312868, -0.1315078650058314 0.8094617549333171, -0.1323724977176764 0.8158883926967821, -0.1325997742583732 0.822368…
11	110780000	114770000	11:110780000-114760000	60	-0.0267599	0.780493	-3.54719	0.0378592	3	0.445463	POLYGON ((-0.01810176229617386 0.7100795728777636, -0.04385429262123539 0.7170145884223647, -0.05050618657908415 0.719191769939502, -0.05688890993628014 0.722063817141505, -0.0629301126634408 0.725598174536333, -0.06856131596705488 0.7297547791528914, -0.07371868851656403 0.7344865146664846, -0.09377211057590562 0.7549550743382457, -0.03916126636916645 0.8084583166501883, -0.02712371855705701 0.8…
11	110780000	114770000	11:110780000-114760000	61	0.0247451	0.766623	-3.54719	0.00961981	3	0.488942	POLYGON ((0.02472143159196686 0.700917580376395, 0.01955384433927412 0.7010884221810152, 0.01355498046457841 0.7018425186370028, 0.007650768028887658 0.7031445573331625, -0.01810176229617386 0.7100795728777636, -0.009590888225952764 0.7416839061595798, 0.02575362270159924 0.7945993839738251, 0.0510644540945846 0.7470430809110497, 0.02472143159196686 0.700917580376395))
11	110780000	114770000	11:110780000-114760000	62	0.0692111	0.779842	-3.54719	0.113158	3	0.237177	POLYGON ((0.09898366491121455 0.7633843685404156, 0.05940998388058125 0.7528733373930533, 0.05932857254316455 0.8040954891227047, 0.119891290717167 0.7914255155282189, 0.09898366491121455 0.7633843685404156))
11	110780000	114770000	11:110780000-114760000	63	0.0813013	0.734323	-3.54719	0.0377592	3	0.37373	POLYGON ((0.04842394994218635 0.6762384667926747, 0.0497739338987235 0.6767215852040803, 0.04717523885972717 0.6781344220117954, 0.04196385149731612 0.6816513042484869, 0.03711225043603395 0.6856499272677298, 0.03266480918621306 0.690093719031218, 0.02866220474865356 0.6949420359169302, 0.02514104557634302 0.7001505344521232, 0.02472324087337257 0.700917520561072, 0.02472143159196686 0.7009175803…
11	110780000	114770000	11:110780000-114760000	64	0.123254	0.739547	-3.54719	0.0458191	3	0.321433	POLYGON ((0.1083783811502643 0.687945683999609, 0.09898366491121455 0.7633843685404156, 0.119891290717167 0.7914255155282189, 0.1341976723377322 0.7992258482047024, 0.1448503900504315 0.800226651021252, 0.1452792693786818 0.7999725028466783, 0.1632075876779834 0.7569487161515381, 0.1083783811502643 0.687945683999609))
11	110780000	114770000	11:110780000-114760000	65	0.155284	0.714096	-1.28405	0.049319	4	-0.393093	POLYGON ((0.1070641173202727 0.6831384718713157, 0.1083783811502643 0.687945683999609, 0.1632075876779834 0.7569487161515381, 0.1817129065612265 0.7417571556762138, 0.1889290950841796 0.6978115997243167, 0.1070641173202727 0.6831384718713157))
11	110780000	114770000	11:110780000-114760000	66	0.163034	0.670855	-3.54719	0.162757	3	0.222437	POLYGON ((0.1062871268168591 0.6821378649374462, 0.1070641173202727 0.6831384718713157, 0.1889290950841796 0.6978115997243167, 0.2234252530870091 0.6636918498427001, 0.2242734271112246 0.6604086786175725, 0.1347795862238188 0.642911776314278, 0.1062871268168591 0.6821378649374462))
11	110780000	114770000	11:110780000-114760000	67	0.171478	0.627667	-1.27911	0.0242595	4	-0.576157	POLYGON ((0.1347795862238188 0.642911776314278, 0.2242734271112246 0.6604086786175725, 0.2341736267053309 0.6463889181612754, 0.2342461505726781 0.6450515329812136, 0.2194173307059793 0.5964848247399732, 0.1982521029609217 0.5713628228315114, 0.1349244457679108 0.6394161559165733, 0.1347795862238188 0.642911776314278))
11	110780000	114770000	11:110780000-114760000	68	0.144017	0.602113	-3.54719	0.0239595	3	0.465427	POLYGON ((0.1924189589813662 0.5573538696528431, 0.1888008110174237 0.5539869686717001, 0.1836922128219695 0.5496955872213368, 0.1781749567425335 0.5459441054302248, 0.1723058707009616 0.5427711636860785, 0.1661454064794579 0.5402094433948111, 0.1597570170652088 0.5382853303609616, 0.1532065030824971 0.5370186430130269, 0.1465613350440741 0.536422428272987, 0.1421440258055033 0.536475662683364, 0…
11	110780000	114770000	11:110780000-114760000	69	0.0994682	0.624683	-3.54719	0.0670587	3	0.342568	POLYGON ((0.05927350196310019 0.6743478518115926, 0.1062871268168591 0.6821378649374462, 0.1347795862238188 0.642911776314278, 0.1349244457679108 0.6394161559165733, 0.1031409153930736 0.5766825660082888, 0.09099468395560979 0.5857089472256645, 0.05927350196310019 0.6743478518115926))
11	110780000	114770000	11:110780000-114760000	70	0.0597168	0.610457	-3.54719	1.99996e-05	3	0.619378	POLYGON ((-0.007603305616014661 0.5937473177384281, -0.005805497478298977 0.6157990840426575, -0.004997777016985783 0.6220214354204, -0.003600516957647251 0.6281384390445852, -0.001626446117897092 0.6340943699820094, 0.0009064520298910708 0.6398349706461079, 0.003975103185166015 0.6453079450749674, 0.007551552422418534 0.6504634353392461, 0.01160321885612086 0.6552544757400076, 0.0160931924474282…
11	110780000	114770000	11:110780000-114760000	71	0.0561212	0.566354	-3.54719	1.99996e-05	3	0.619378	POLYGON ((0.00893310053458421 0.5157155858691994, -0.001496678375729754 0.5347011096538427, -0.004298636860939183 0.5404471346070108, -0.006529241563707162 0.5464381426002664, -0.008167399003792979 0.5526174802926694, -0.009197618116575899 0.5589267134231631, -0.009610156742688857 0.5653061793880561, -0.009401113753730352 0.5716955514341987, -0.007603305616014661 0.5937473177384281, 0.09099468395…
11	110780000	114770000	11:110780000-114760000	72	0.0769807	0.528383	-3.54719	0.0273195	3	0.619378	POLYGON ((0.01297970436250396 0.5028266258681936, 0.01249763532739984 0.5092269957780646, 0.00893310053458421 0.5157155858691994, 0.1062045847680219 0.5691520928805812, 0.1421440258055033 0.536475662683364, 0.1421267704588728 0.5364758706330804, 0.1425347632691666 0.5333201439202786, 0.1440877343106408 0.5127015428466677, 0.01297970436250396 0.5028266258681936))
11	110780000	114770000	11:110780000-114760000	73	0.0800867	0.487145	-3.54719	0.0326593	3	0.456499	POLYGON ((0.01445881562007177 0.4831886518501283, 0.01297970436250396 0.5028266258681936, 0.1440877343106408 0.5127015428466677, 0.1448333143006468 0.502802571151865, 0.1495909070676338 0.4915295406549723, 0.03276054942521403 0.4422232547687344, 0.01445881562007177 0.4831886518501283))
11	110780000	114770000	11:110780000-114760000	74	0.0979616	0.444791	-3.54719	0.0765585	3	0.619378	POLYGON ((0.1495909070676338 0.4915295406549723, 0.1585283570599407 0.4703524136366928, 0.1605867064776867 0.4647862838141481, 0.1621347091866848 0.4590572096184433, 0.163159750151041 0.45321187861427, 0.1636534760723512 0.4472979257702254, 0.1636118634626829 0.4413635452703186, 0.1630352514329185 0.4354570977683012, 0.1600204290456601 0.414439016904784, 0.04097020110571765 0.4315155185479261, 0.…
11	110780000	114770000	11:110780000-114760000	75	0.0919319	0.402755	-3.54719	0.359813	3	0.100882	POLYGON ((0.1600204290456601 0.414439016904784, 0.1570056066584018 0.3934209360412668, 0.155832823822844 0.3873153416033804, 0.1540885063239422 0.3813478413325506, 0.1517882554795819 0.3755718090375969, 0.148952644920803 0.3700389060221564, 0.1456070365795673 0.3647986190217734, 0.1417813538495718 0.3598978175905029, 0.137509813948976 0.3553803348957992, 0.1328306218788143 0.3512865756710934, 0.1…
11	110780000	114770000	11:110780000-114760000	76	0.0574745	0.375374	-3.54719	0.0884982	3	0.25345	POLYGON ((0.1156019228289605 0.3375960446290182, 0.1095218673724607 0.3327646184299834, 0.08785309171663608 0.3344976787787958, 0.05028131904722393 0.3446369814408517, 0.03966033280105985 0.3533485030174031, 0.01915160478721675 0.3833873863437098, 0.02631322208444745 0.4261513149306806, 0.0331301248183751 0.4360881805956942, 0.04097020110571765 0.4315155185479261, 0.1156019228289605 0.33759604462…
11	110780000	114770000	11:110780000-114760000	77	0.0126602	0.344777	-3.54719	0.112278	3	0.218066	POLYGON ((-0.01535792394796827 0.3577337384252682, 0.01915160478721675 0.3833873863437098, 0.03966033280105985 0.3533485030174031, -0.002374855568536935 0.3250705032010124, -0.01535792394796827 0.3577337384252682))
11	110780000	114770000	11:110780000-114760000	78	0.0410344	0.314454	-3.54719	0.148237	3	0.194459	POLYGON ((0.08785309171663608 0.3344976787787958, 0.0324842380867264 0.2975631209415346, 0.01430877235758433 0.303675844356592, 0.05028131904722393 0.3446369814408517, 0.08785309171663608 0.3344976787787958))
11	110780000	114770000	11:110780000-114760000	79	0.0290898	0.278938	-3.54719	0.0736185	3	0.274582	POLYGON ((0.03264965586653659 0.2525694971528429, 0.02690871728693699 0.2513327660697802, 0.007343677022125758 0.2665310172370682, 0.006995729991113331 0.3026275742829137, 0.01430877235758433 0.303675844356592, 0.0324842380867264 0.2975631209415346, 0.04911900044575826 0.2790659545403498, 0.03264965586653659 0.2525694971528429))
11	110780000	114770000	11:110780000-114760000	80	-0.0146375	0.278517	-3.54719	0.0605388	3	0.258197	POLYGON ((0.007343677022125758 0.2665310172370682, -0.01866225096427071 0.2554893090885407, -0.03599495070113658 0.2739363218981098, -0.0005421593751229747 0.3077685286669068, 0.006995729991113331 0.3026275742829137, 0.007343677022125758 0.2665310172370682))
11	110780000	114770000	11:110780000-114760000	81	0.00070044	0.242392	-3.54719	0.229975	3	0.152012	POLYGON ((-0.003255035604736622 0.1734280915217885, -0.02303606444677188 0.1810870679490202, -0.02903676412777905 0.1837625309378068, -0.03337136997387175 0.1862408374897778, -0.03597915213044925 0.1853285243725764, -0.01866225096427071 0.2554893090885407, 0.007343677022125758 0.2665310172370682, 0.02690871728693699 0.2513327660697802, -0.003255035604736622 0.1734280915217885))
11	110780000	114770000	11:110780000-114760000	82	0.0402625	0.227074	-3.54719	0.445331	3	0.0354805	POLYGON ((0.1074334367802888 0.2138128324462568, 0.09862962135794213 0.1968252353778743, 0.09540886196763249 0.1912887002023296, 0.09166459118690569 0.1860918791431717, 0.08743235385019044 0.1812841062776938, 0.08275232711993202 0.1769110223996532, 0.07766893907972559 0.1730141417454635, 0.07223044697291903 0.1696304578943163, 0.06648847909051984 0.1667920925834714, 0.06049754465732162 0.16452599…
11	110780000	114770000	11:110780000-114760000	83	0.0578701	0.261049	-3.54719	0.107018	3	0.268236	POLYGON ((0.1194097945894716 0.2911265101775163, 0.1226629895562772 0.2721663839113254, 0.123413283229763 0.2661287542739464, 0.1236021923701268 0.260047617408909, 0.1232280989492256 0.2539750589409263, 0.1222942071195001 0.2479630910197709, 0.120808515770047 0.2420632068303321, 0.1187837500152298 0.2363259395476662, 0.1162372522026354 0.2308004295146392, 0.1074334367802888 0.2138128324462568, 0.…
11	110780000	114770000	11:110780000-114760000	84	0.0513637	0.298969	-1.12273	0.0189996	4	-0.576307	POLYGON ((0.1095218673724607 0.3327646184299834, 0.108266685595212 0.3317672067835703, 0.1104037942871129 0.3278827249257583, 0.1128838143125254 0.3221424139662048, 0.1148072169042727 0.3161924398730782, 0.116156599622666 0.3100866364437072, 0.1194097945894716 0.2911265101775163, 0.04911900044575826 0.2790659545403498, 0.0324842380867264 0.2975631209415346, 0.08785309171663608 0.3344976787787958,…
11	110780000	114770000	11:110780000-114760000	85	0.0215454	0.33157	-1.31466	0.047619	4	-0.353177	POLYGON ((-0.002374855568536935 0.3250705032010124, 0.03966033280105985 0.3533485030174031, 0.05028131904722393 0.3446369814408517, 0.01430877235758433 0.303675844356592, 0.006995729991113331 0.3026275742829137, -0.0005421593751229747 0.3077685286669068, -0.001558418496527641 0.3092148868690581, -0.002374855568536935 0.3250705032010124))
11	110780000	114770000	11:110780000-114760000	86	-0.0268362	0.329078	-3.54719	0.0451991	3	0.275396	POLYGON ((-0.01961771367747896 0.3582477040136682, -0.01535792394796827 0.3577337384252682, -0.002374855568536935 0.3250705032010124, -0.001558418496527641 0.3092148868690581, -0.04732975783417628 0.3140378558139555, -0.04811969634487145 0.3196367486482881, -0.01961771367747896 0.3582477040136682))
11	110780000	114770000	11:110780000-114760000	87	-0.0711846	0.322821	-3.54719	0.0589988	3	0.260614	POLYGON ((-0.09162713213696891 0.3479180371044427, -0.07420286241560589 0.3534161059787364, -0.04811969634487145 0.3196367486482881, -0.04732975783417628 0.3140378558139555, -0.06859870879881226 0.2828116772286024, -0.07293583500263964 0.2809947652378327, -0.1026575137701584 0.3276529115735667, -0.09162713213696891 0.3479180371044427))
11	110780000	114770000	11:110780000-114760000	88	-0.111582	0.297088	-3.54719	0.116258	3	0.207359	POLYGON ((-0.1763281143842799 0.2970190207167516, -0.161531116600913 0.3144223140886587, -0.1026575137701584 0.3276529115735667, -0.07293583500263964 0.2809947652378327, -0.07458755792829116 0.2783895744127326, -0.08511402378204176 0.2735158527008333, -0.1732667291244727 0.2863188798979044, -0.1752393729374218 0.2893202033882589, -0.1763281143842799 0.2970190207167516))
11	110780000	114770000	11:110780000-114760000	89	-0.117194	0.258447	-3.54719	0.0224196	3	0.339332	POLYGON ((-0.1732667291244727 0.2863188798979044, -0.08511402378204176 0.2735158527008333, -0.1244776848869387 0.2098612145948764, -0.1279570983395858 0.2116739504660605, -0.1670870220421347 0.2634931076183319, -0.1732667291244727 0.2863188798979044))
11	110780000	114770000	11:110780000-114760000	90	-0.0842634	0.238083	-3.54719	0.104318	3	0.236808	POLYGON ((-0.04137094405874194 0.1834422462227717, -0.06235926734699573 0.1760996380238303, -0.0618900203986877 0.1757326608497081, -0.07559795528544211 0.1770790704880337, -0.1106221778199851 0.1929175080324212, -0.1244776848869387 0.2098612145948764, -0.08511402378204176 0.2735158527008333, -0.07458755792829116 0.2783895744127326, -0.04137094405874194 0.1834422462227717))
11	110780000	114770000	11:110780000-114760000	91	-0.0418954	0.252905	-1.3066	0.0109798	4	-0.463377	POLYGON ((-0.03597915213044925 0.1853285243725764, -0.04137094405874194 0.1834422462227717, -0.07458755792829116 0.2783895744127326, -0.07293583500263964 0.2809947652378327, -0.06859870879881226 0.2828116772286024, -0.03599495070113658 0.2739363218981098, -0.01866225096427071 0.2554893090885407, -0.03597915213044925 0.1853285243725764))
11	110780000	114770000	11:110780000-114760000	92	-0.0304211	0.295056	-3.54719	0.0448791	3	0.275396	POLYGON ((-0.03599495070113658 0.2739363218981098, -0.06859870879881226 0.2828116772286024, -0.04732975783417628 0.3140378558139555, -0.001558418496527641 0.3092148868690581, -0.0005421593751229747 0.3077685286669068, -0.03599495070113658 0.2739363218981098))
11	110780000	114770000	11:110780000-114760000	93	-0.0453665	0.342757	-3.54719	0.0587788	3	0.260614	POLYGON ((-0.03987514695325312 0.3696688654790776, -0.01961771367747896 0.3582477040136682, -0.04811969634487145 0.3196367486482881, -0.07420286241560589 0.3534161059787364, -0.06187270512877807 0.3678796880408874, -0.03987514695325312 0.3696688654790776))
11	110780000	114770000	11:110780000-114760000	94	-0.0196911	0.388297	-1.41421	0.0119398	4	-0.419224	POLYGON ((-0.03002138051658632 0.4115767840950265, 0.02631322208444745 0.4261513149306806, 0.01915160478721675 0.3833873863437098, -0.01535792394796827 0.3577337384252682, -0.01961771367747896 0.3582477040136682, -0.03987514695325312 0.3696688654790776, -0.03002138051658632 0.4115767840950265))
11	110780000	114770000	11:110780000-114760000	95	-0.0322773	0.436946	-3.54719	0.0186796	3	0.404384	POLYGON ((-0.04552674139490802 0.5042098081453071, -0.02616103227519264 0.5024002291697075, -0.01952554622940124 0.5014367645704972, -0.01302271400812099 0.499802410814512, -0.00672018339718335 0.4975141697878678, -0.0006835184810451769 0.494595845647528, 0.005024482408507121 0.4910777971909695, 0.01034443997202942 0.4869966220391112, 0.01446486585521521 0.4831083236395612, 0.01445881562007177 0.…
11	110780000	114770000	11:110780000-114760000	96	-0.0710087	0.440565	-3.54719	0.129457	3	0.222867	POLYGON ((-0.06627765795117527 0.5067102009119571, -0.0660543010956251 0.5060694304181736, -0.06489245051462347 0.5060193871209069, -0.04552674139490802 0.5042098081453071, -0.05327563633191966 0.4212828691319536, -0.07783234269398501 0.4096817676712756, -0.09711453258278921 0.4155217902290135, -0.09874020011983668 0.4579660136584611, -0.06627765795117527 0.5067102009119571))
11	110780000	114770000	11:110780000-114760000	97	-0.0496433	0.395339	-0.753141	0.00775984	4	-0.708651	POLYGON ((-0.05327563633191966 0.4212828691319536, -0.03002138051658632 0.4115767840950265, -0.03987514695325312 0.3696688654790776, -0.06187270512877807 0.3678796880408874, -0.07783234269398501 0.4096817676712756, -0.05327563633191966 0.4212828691319536))
11	110780000	114770000	11:110780000-114760000	98	-0.0892907	0.380202	-3.54719	0.0217796	3	0.329053	POLYGON ((-0.07783234269398501 0.4096817676712756, -0.06187270512877807 0.3678796880408874, -0.07420286241560589 0.3534161059787364, -0.09162713213696891 0.3479180371044427, -0.1172840228335262 0.3787249465060318, -0.112507234254676 0.4060766594665046, -0.09711453258278921 0.4155217902290135, -0.07783234269398501 0.4096817676712756))
11	110780000	114770000	11:110780000-114760000	99	-0.123801	0.351461	-3.54719	0.0149797	3	0.342877	POLYGON ((-0.161531116600913 0.3144223140886587, -0.1546981773865477 0.3597757960937114, -0.1172840228335262 0.3787249465060318, -0.09162713213696891 0.3479180371044427, -0.1026575137701584 0.3276529115735667, -0.161531116600913 0.3144223140886587))
11	110780000	114770000	11:110780000-114760000	100	-0.143119	0.389603	-1.20186	0.00169997	4	-0.611752	POLYGON ((-0.1652092893960732 0.400842535879437, -0.1371468757315819 0.4151783148706522, -0.112507234254676 0.4060766594665046, -0.1172840228335262 0.3787249465060318, -0.1546981773865477 0.3597757960937114, -0.171424502352067 0.3851853001295479, -0.1652092893960732 0.400842535879437))
11	110780000	114770000	11:110780000-114760000	101	-0.16137	0.425328	-3.54719	0.121378	3	0.208506	POLYGON ((-0.1864189669668681 0.4342939619512787, -0.154596300323325 0.4588657063646679, -0.1524453322672226 0.4573675390521904, -0.1371468757315819 0.4151783148706522, -0.1652092893960732 0.400842535879437, -0.1864189669668681 0.4342939619512787))
11	110780000	114770000	11:110780000-114760000	102	-0.125059	0.438495	-3.54719	0.048599	3	0.288952	POLYGON ((-0.1524453322672226 0.4573675390521904, -0.09874020011983668 0.4579660136584611, -0.09711453258278921 0.4155217902290135, -0.112507234254676 0.4060766594665046, -0.1371468757315819 0.4151783148706522, -0.1524453322672226 0.4573675390521904))
11	110780000	114770000	11:110780000-114760000	103	-0.125487	0.476846	-3.54719	0.239375	3	0.150133	POLYGON ((-0.07118785176160329 0.52079666046893, -0.06627765795117527 0.5067102009119571, -0.09874020011983668 0.4579660136584611, -0.1524453322672226 0.4573675390521904, -0.154596300323325 0.4588657063646679, -0.1620602374277387 0.4882900435872776, -0.1615963577710739 0.4892824758846286, -0.07118785176160329 0.52079666046893))
11	110780000	114770000	11:110780000-114760000	104	-0.141042	0.521471	-1.0836	0.0706786	4	-0.579822	POLYGON ((-0.112780977689662 0.5846396623334599, -0.0967936308095714 0.5700895462746333, -0.09218707401147225 0.5654583016463673, -0.08806286684128466 0.5603927604553071, -0.08446172814552542 0.5549429354640931, -0.08141921244601841 0.5491626335204911, -0.0789653589053665 0.54310892431522, -0.07118785176160329 0.52079666046893, -0.1615963577710739 0.4892824758846286, -0.1693616447335347 0.5224700…
11	110780000	114770000	11:110780000-114760000	105	-0.173017	0.550571	-3.54719	0.425711	2	-0.0523569	POLYGON ((-0.2053962165534244 0.6113736342690904, -0.2023162127263916 0.6093361581185587, -0.1998922421023979 0.6105658504623465, -0.1939787238020333 0.6128788767976018, -0.1878696367272191 0.614610594046078, -0.1816219762003102 0.6157448459831876, -0.1752940303781679 0.6162710504951064, -0.168944836447128 0.6161842983056345, -0.162633629829826 0.6154853987777653, -0.1564192915425573 0.6141808723…
11	110780000	114770000	11:110780000-114760000	106	-0.194298	0.50901	-3.54719	0.128517	3	0.203913	POLYGON ((-0.225281627160335 0.5135546614108527, -0.1972656687462101 0.5367584151495879, -0.1693616447335347 0.5224700722710797, -0.1615963577710739 0.4892824758846286, -0.1620602374277387 0.4882900435872776, -0.19533403061823 0.4844656232938387, -0.225281627160335 0.5135546614108527))
11	110780000	114770000	11:110780000-114760000	107	-0.223976	0.544843	-0.396419	0.0367593	4	-0.726408	POLYGON ((-0.2515639452194489 0.5410155288388011, -0.2055611748373516 0.61055681342954, -0.1972656687462101 0.5367584151495879, -0.225281627160335 0.5135546614108527, -0.2288054379716427 0.5133199171671703, -0.2496718077659141 0.5299502017847453, -0.2515639452194489 0.5410155288388011))
11	110780000	114770000	11:110780000-114760000	108	-0.258834	0.567902	-1.53604	0.0907382	4	-0.31307	POLYGON ((-0.3033190070043182 0.6183328160840148, -0.3018109830018495 0.6176287028796777, -0.2968870809093155 0.6215087116989764, -0.291336960508064 0.6250445369094411, -0.285461145675341 0.6280077609034886, -0.2793185153231657 0.6303686905390093, -0.272970622002523 0.6321036679962369, -0.2664810751127856 0.6331953078421771, -0.2599149035003756 0.6336326712422559, -0.2533379038337852 0.6334113755…
11	110780000	114770000	11:110780000-114760000	109	-0.278856	0.535458	-3.54719	0.0352393	3	0.307296	POLYGON ((-0.3041867558957502 0.5313443114271874, -0.2896281384258615 0.5645057045111102, -0.2515639452194489 0.5410155288388011, -0.2496718077659141 0.5299502017847453, -0.2798871537975842 0.5117562907241475, -0.3038353988752605 0.5300274714138017, -0.3041867558957502 0.5313443114271874))
11	110780000	114770000	11:110780000-114760000	110	-0.258456	0.50158	-1.27641	0.00539989	4	-0.499689	POLYGON ((-0.2496718077659141 0.5299502017847453, -0.2288054379716427 0.5133199171671703, -0.2462007978766439 0.4777065876995479, -0.2774724470131977 0.4734618710077944, -0.2822294123456315 0.4764582644001784, -0.2798871537975842 0.5117562907241475, -0.2496718077659141 0.5299502017847453))
11	110780000	114770000	11:110780000-114760000	111	-0.219838	0.482716	-3.54719	0.0898982	3	0.216319	POLYGON ((-0.2288054379716427 0.5133199171671703, -0.225281627160335 0.5135546614108527, -0.19533403061823 0.4844656232938387, -0.2193531167795268 0.4504078704972943, -0.2462007978766439 0.4777065876995479, -0.2288054379716427 0.5133199171671703))
11	110780000	114770000	11:110780000-114760000	112	-0.188757	0.460797	-3.54719	0.0426391	3	0.273305	POLYGON ((-0.19533403061823 0.4844656232938387, -0.1620602374277387 0.4882900435872776, -0.154596300323325 0.4588657063646679, -0.1864189669668681 0.4342939619512787, -0.2062679224411234 0.4343827368009909, -0.2188981774030204 0.4473530578342844, -0.2193531167795268 0.4504078704972943, -0.19533403061823 0.4844656232938387))
11	110780000	114770000	11:110780000-114760000	113	-0.188994	0.407813	-3.54719	0.0422992	3	0.282692	POLYGON ((-0.2096194807548463 0.3832948381313518, -0.2163981370159201 0.3885923566484679, -0.2062679224411234 0.4343827368009909, -0.1864189669668681 0.4342939619512787, -0.1652092893960732 0.400842535879437, -0.171424502352067 0.3851853001295479, -0.2096194807548463 0.3832948381313518))
11	110780000	114770000	11:110780000-114760000	114	-0.186673	0.360933	-3.54719	0.0237995	3	0.319843	POLYGON ((-0.2037145925971441 0.3143883419322301, -0.2096194807548463 0.3832948381313518, -0.171424502352067 0.3851853001295479, -0.1546981773865477 0.3597757960937114, -0.161531116600913 0.3144223140886587, -0.1763281143842799 0.2970190207167516, -0.2037145925971441 0.3143883419322301))
11	110780000	114770000	11:110780000-114760000	115	-0.228427	0.357355	-1.31466	0.0180196	4	-0.399432	POLYGON ((-0.2632655437730617 0.3450448461534145, -0.2296744471507015 0.3875537923207155, -0.2163981370159201 0.3885923566484679, -0.2096194807548463 0.3832948381313518, -0.2037145925971441 0.3143883419322301, -0.2362661663962817 0.3186027783749684, -0.2632655437730617 0.3450448461534145))
11	110780000	114770000	11:110780000-114760000	116	-0.259343	0.381786	-3.54719	0.0149997	3	0.324778	POLYGON ((-0.2296744471507015 0.3875537923207155, -0.2632655437730617 0.3450448461534145, -0.2766386549495792 0.3479311895334541, -0.2963934106126944 0.3730868070451232, -0.2958605072418851 0.3910524887373112, -0.2822025100530851 0.410024234178012, -0.2698820028207684 0.4169915243788518, -0.2296744471507015 0.3875537923207155))
11	110780000	114770000	11:110780000-114760000	117	-0.233138	0.417579	-3.54719	0.0306194	3	0.297996	POLYGON ((-0.2163981370159201 0.3885923566484679, -0.2296744471507015 0.3875537923207155, -0.2698820028207684 0.4169915243788518, -0.2684766440548469 0.4202413143237715, -0.2188981774030204 0.4473530578342844, -0.2062679224411234 0.4343827368009909, -0.2163981370159201 0.3885923566484679))
11	110780000	114770000	11:110780000-114760000	118	-0.251649	0.45143	-3.54719	0.0381792	3	0.27858	POLYGON ((-0.2188981774030204 0.4473530578342844, -0.2684766440548469 0.4202413143237715, -0.2774724470131977 0.4734618710077944, -0.2462007978766439 0.4777065876995479, -0.2193531167795268 0.4504078704972943, -0.2188981774030204 0.4473530578342844))
11	110780000	114770000	11:110780000-114760000	119	-0.29462	0.444167	-3.54719	0.0205596	3	0.304276	POLYGON ((-0.2998273854861887 0.4741672340285115, -0.2822294123456315 0.4764582644001784, -0.2774724470131977 0.4734618710077944, -0.2684766440548469 0.4202413143237715, -0.2698820028207684 0.4169915243788518, -0.2822025100530851 0.410024234178012, -0.3230028013199227 0.4511859591104908, -0.2998273854861887 0.4741672340285115))
11	110780000	114770000	11:110780000-114760000	120	-0.329783	0.479627	-3.54719	0.0175396	3	0.330863	POLYGON ((-0.332007237553367 0.5010713507887329, -0.3240653580534478 0.5007767609946236, -0.2998273854861887 0.4741672340285115, -0.3230028013199227 0.4511859591104908, -0.3231570771766566 0.4511492148863078, -0.3484916070541005 0.4672225843050578, -0.332007237553367 0.5010713507887329))
11	110780000	114770000	11:110780000-114760000	121	-0.3282	0.522292	-3.54719	0.049219	3	0.289958	POLYGON ((-0.3499566077777614 0.5462051684177287, -0.3041867558957502 0.5313443114271874, -0.3038353988752605 0.5300274714138017, -0.3240653580534478 0.5007767609946236, -0.332007237553367 0.5010713507887329, -0.3478469433856086 0.5117604943662273, -0.3499566077777614 0.5462051684177287))
11	110780000	114770000	11:110780000-114760000	122	-0.368632	0.519816	-3.54719	0.0146997	3	0.383804	POLYGON ((-0.3900836147284822 0.5157885334590759, -0.371861781672088 0.5476108263305489, -0.350118269629038 0.5464520239446201, -0.3499566077777614 0.5462051684177287, -0.3478469433856086 0.5117604943662273, -0.3734312199931493 0.496206107988237, -0.3900836147284822 0.5157885334590759))
11	110780000	114770000	11:110780000-114760000	123	-0.397505	0.495263	-3.54719	0.00145997	3	0.467612	POLYGON ((-0.435282632370021 0.5158298307663267, -0.3900836147284822 0.5157885334590759, -0.3734312199931493 0.496206107988237, -0.3767926685199132 0.4681631047129339, -0.3980010849131514 0.4488493591382979, -0.4303192078624443 0.4880170907134714, -0.435282632370021 0.5158298307663267))
11	110780000	114770000	11:110780000-114760000	124	-0.397468	0.536328	-3.54719	0.00165997	3	0.619378	POLYGON ((-0.4619364372626077 0.5491814095904062, -0.4619296575055262 0.5492267745801345, -0.4603526796021195 0.5554903688175017, -0.4581686452882838 0.5615689760752706, -0.4553986380735341 0.5674039167012279, -0.4520693981391484 0.572938863271657, -0.4482130642026321 0.578120384346427, -0.4323272774514823 0.5974090599186985, -0.371861781672088 0.5476108263305489, -0.3900836147284822 0.5157885334…
11	110780000	114770000	11:110780000-114760000	125	-0.365696	0.574905	-3.54719	0.0105398	3	0.496517	POLYGON ((-0.4323272774514823 0.5974090599186985, -0.4164414907003324 0.61669773549097, -0.4119486210479362 0.6216214800906164, -0.4069802564558537 0.6260649575437054, -0.4015874739961479 0.6299824868592637, -0.3958257139516745 0.6333337940349609, -0.3897542098644871 0.636084426092368, -0.3834353795877936 0.6382061052694141, -0.3769341836017311 0.6396770197287811, -0.3703174571897661 0.6404820477…
11	110780000	114770000	11:110780000-114760000	126	-0.318302	0.552776	-3.54719	0.0697386	3	0.295048	POLYGON ((-0.3141870322713028 0.6234072181379777, -0.3033190070043182 0.6183328160840148, -0.2896281384258615 0.5645057045111102, -0.3041867558957502 0.5313443114271874, -0.3499566077777614 0.5462051684177287, -0.350118269629038 0.5464520239446201, -0.3141870322713028 0.6234072181379777))
11	110780000	114770000	11:110780000-114760000	127	-0.302475	0.504501	-3.54719	0.0122398	3	0.349853	POLYGON ((-0.3240653580534478 0.5007767609946236, -0.3038353988752605 0.5300274714138017, -0.2798871537975842 0.5117562907241475, -0.2822294123456315 0.4764582644001784, -0.2998273854861887 0.4741672340285115, -0.3240653580534478 0.5007767609946236))
11	110780000	114770000	11:110780000-114760000	128	-0.350262	0.4896	-3.54719	0.00709986	3	0.398251	POLYGON ((-0.3478469433856086 0.5117604943662273, -0.332007237553367 0.5010713507887329, -0.3484916070541005 0.4672225843050578, -0.3767926685199132 0.4681631047129339, -0.3734312199931493 0.496206107988237, -0.3478469433856086 0.5117604943662273))
11	110780000	114770000	11:110780000-114760000	129	-0.351744	0.445012	-3.54719	0.0049199	3	0.375891	POLYGON ((-0.3767926685199132 0.4681631047129339, -0.3484916070541005 0.4672225843050578, -0.3231570771766566 0.4511492148863078, -0.3470735051006761 0.413013953122189, -0.3532185773804494 0.4111132986422851, -0.3995623375801708 0.4365944524343514, -0.3996140287907703 0.4366609109270474, -0.3980010849131514 0.4488493591382979, -0.3767926685199132 0.4681631047129339))
11	110780000	114770000	11:110780000-114760000	130	-0.316234	0.422743	-1.27359	0.00925981	4	-0.419935	POLYGON ((-0.2958605072418851 0.3910524887373112, -0.3470735051006761 0.413013953122189, -0.3231570771766566 0.4511492148863078, -0.3230028013199227 0.4511859591104908, -0.2822025100530851 0.410024234178012, -0.2958605072418851 0.3910524887373112))
11	110780000	114770000	11:110780000-114760000	131	-0.332863	0.383967	-3.54719	0.0173197	3	0.314463	POLYGON ((-0.3470735051006761 0.413013953122189, -0.2958605072418851 0.3910524887373112, -0.2963934106126944 0.3730868070451232, -0.3458684862546271 0.3518510261329508, -0.3619084416737927 0.3570138703781192, -0.3532185773804494 0.4111132986422851, -0.3470735051006761 0.413013953122189))
11	110780000	114770000	11:110780000-114760000	132	-0.381052	0.391707	-3.54719	0.0313194	3	0.285226	POLYGON ((-0.3532185773804494 0.4111132986422851, -0.3619084416737927 0.3570138703781192, -0.3709015205987817 0.3537098515403994, -0.4004615948872817 0.3800564842970688, -0.3995623375801708 0.4365944524343514, -0.3532185773804494 0.4111132986422851))
11	110780000	114770000	11:110780000-114760000	133	-0.409812	0.35944	-3.54719	0.0802584	3	0.235103	POLYGON ((-0.3742185220958096 0.3492262002608842, -0.4175945351883258 0.3370786543568549, -0.4328325619919092 0.3705271543258017, -0.4004615948872817 0.3800564842970688, -0.3709015205987817 0.3537098515403994, -0.3742185220958096 0.3492262002608842))
11	110780000	114770000	11:110780000-114760000	134	-0.39933	0.322012	-1.22088	0.202756	4	-0.177263	POLYGON ((-0.3815526629576899 0.2904923979635838, -0.4256247420418069 0.3062889499258364, -0.4295130986280539 0.3169834941758373, -0.4175945351883258 0.3370786543568549, -0.3742185220958096 0.3492262002608842, -0.3790935326885801 0.2916261731254198, -0.3815526629576899 0.2904923979635838))
11	110780000	114770000	11:110780000-114760000	135	-0.354038	0.318179	-3.54719	0.407112	2	-0.0385876	POLYGON ((-0.3241687613001762 0.3100497124322193, -0.361797996410732 0.2873943453115057, -0.3790935326885801 0.2916261731254198, -0.3742185220958096 0.3492262002608842, -0.3709015205987817 0.3537098515403994, -0.3619084416737927 0.3570138703781192, -0.3458684862546271 0.3518510261329508, -0.3241687613001762 0.3100497124322193))
11	110780000	114770000	11:110780000-114760000	136	-0.313629	0.339156	-3.54719	0.358413	3	0.0604658	POLYGON ((-0.2766386549495792 0.3479311895334541, -0.3022801238333649 0.3138741735492794, -0.31370435275978 0.3069916089624848, -0.3241687613001762 0.3100497124322193, -0.3458684862546271 0.3518510261329508, -0.2963934106126944 0.3730868070451232, -0.2766386549495792 0.3479311895334541))
11	110780000	114770000	11:110780000-114760000	137	-0.274847	0.309957	-1.09563	0.0719986	4	-0.345937	POLYGON ((-0.2632655437730617 0.3450448461534145, -0.2362661663962817 0.3186027783749684, -0.2607275146261618 0.2898027292139144, -0.3022801238333649 0.3138741735492794, -0.2766386549495792 0.3479311895334541, -0.2632655437730617 0.3450448461534145))
11	110780000	114770000	11:110780000-114760000	138	-0.302613	0.273277	-3.54719	0.457671	3	0.019491	POLYGON ((-0.2886851610527496 0.2448727282461602, -0.2985574086598366 0.2432461697901218, -0.3209367195659318 0.2586588993124956, -0.311581231391765 0.2990187020440733, -0.2746121843760304 0.2647504548313369, -0.2886851610527496 0.2448727282461602))
11	110780000	114770000	11:110780000-114760000	139	-0.32806	0.236327	-0.741814	0.292194	4	-0.172163	POLYGON ((-0.2985574086598366 0.2432461697901218, -0.330998325740905 0.1930800299872887, -0.3608452852310134 0.2214819442445954, -0.3433114451452832 0.2571678843247258, -0.3209367195659318 0.2586588993124956, -0.2985574086598366 0.2432461697901218))
11	110780000	114770000	11:110780000-114760000	140	-0.292764	0.213502	-3.54719	0.174717	3	0.156341	POLYGON ((-0.3255821503936613 0.175815933581411, -0.330998325740905 0.1930800299872887, -0.2985574086598366 0.2432461697901218, -0.2886851610527496 0.2448727282461602, -0.2649134946054561 0.2143790909452623, -0.2745224802983149 0.1849734807203843, -0.2892046193638843 0.175367791540514, -0.3255821503936613 0.175815933581411))
11	110780000	114770000	11:110780000-114760000	141	-0.257267	0.241174	-0.279878	0.124438	4	-0.424192	POLYGON ((-0.2649134946054561 0.2143790909452623, -0.2886851610527496 0.2448727282461602, -0.2746121843760304 0.2647504548313369, -0.2663993598851002 0.2692673984901311, -0.2304170172166853 0.2515285370976324, -0.234365929431331 0.2243269528475169, -0.2649134946054561 0.2143790909452623))
11	110780000	114770000	11:110780000-114760000	142	-0.238554	0.279132	-3.54719	0.156057	3	0.166644	POLYGON ((-0.2362661663962817 0.3186027783749684, -0.2037145925971441 0.3143883419322301, -0.1763281143842799 0.2970190207167516, -0.1752393729374218 0.2893202033882589, -0.2304170172166853 0.2515285370976324, -0.2663993598851002 0.2692673984901311, -0.2607275146261618 0.2898027292139144, -0.2362661663962817 0.3186027783749684))
11	110780000	114770000	11:110780000-114760000	143	-0.285235	0.292025	-3.54719	0.241795	3	0.125623	POLYGON ((-0.3022801238333649 0.3138741735492794, -0.2607275146261618 0.2898027292139144, -0.2663993598851002 0.2692673984901311, -0.2746121843760304 0.2647504548313369, -0.311581231391765 0.2990187020440733, -0.31370435275978 0.3069916089624848, -0.3022801238333649 0.3138741735492794))
11	110780000	114770000	11:110780000-114760000	144	-0.330961	0.279848	-3.54719	0.276154	3	0.0993818	POLYGON ((-0.3241687613001762 0.3100497124322193, -0.31370435275978 0.3069916089624848, -0.311581231391765 0.2990187020440733, -0.3209367195659318 0.2586588993124956, -0.3433114451452832 0.2571678843247258, -0.361797996410732 0.2873943453115057, -0.3241687613001762 0.3100497124322193))
11	110780000	114770000	11:110780000-114760000	145	-0.369128	0.256505	-3.54719	0.404792	3	0.0435329	POLYGON ((-0.4010278409935761 0.247540699251342, -0.3815526629576899 0.2904923979635838, -0.3790935326885801 0.2916261731254198, -0.361797996410732 0.2873943453115057, -0.3433114451452832 0.2571678843247258, -0.3608452852310134 0.2214819442445954, -0.3789238369031011 0.2227798375057289, -0.4010278409935761 0.247540699251342))
11	110780000	114770000	11:110780000-114760000	146	-0.415305	0.277442	-0.556113	0.114978	4	-0.361571	POLYGON ((-0.4010278409935761 0.247540699251342, -0.4392033889317934 0.2464285898076182, -0.4481856207025746 0.268164745942329, -0.4256247420418069 0.3062889499258364, -0.3815526629576899 0.2904923979635838, -0.4010278409935761 0.247540699251342))
11	110780000	114770000	11:110780000-114760000	147	-0.455878	0.301452	-3.54719	0.146757	3	0.162601	POLYGON ((-0.4872329107840469 0.2854848595835217, -0.4936784986834128 0.3003959976745749, -0.4662129242855941 0.3304503903824613, -0.4295130986280539 0.3169834941758373, -0.4256247420418069 0.3062889499258364, -0.4481856207025746 0.268164745942329, -0.4872329107840469 0.2854848595835217))
11	110780000	114770000	11:110780000-114760000	148	-0.439574	0.345881	-3.54719	0.0273795	3	0.28951	POLYGON ((-0.4662129242855941 0.3304503903824613, -0.4702160427108225 0.3596372852072829, -0.4564403733230182 0.3806297650158167, -0.4562445185301583 0.3806525946370402, -0.4328325619919092 0.3705271543258017, -0.4175945351883258 0.3370786543568549, -0.4295130986280539 0.3169834941758373, -0.4662129242855941 0.3304503903824613))
11	110780000	114770000	11:110780000-114760000	149	-0.419491	0.392319	-0.852152	0.00935981	4	-0.591636	POLYGON ((-0.4562445185301583 0.3806525946370402, -0.408052961213528 0.4335155539480099, -0.3996140287907703 0.4366609109270474, -0.3995623375801708 0.4365944524343514, -0.4004615948872817 0.3800564842970688, -0.4328325619919092 0.3705271543258017, -0.4562445185301583 0.3806525946370402))
11	110780000	114770000	11:110780000-114760000	150	-0.448019	0.418326	-3.54719	0.0097998	3	0.38415	POLYGON ((-0.4564403733230182 0.3806297650158167, -0.4745352718055713 0.4042247631749797, -0.46959260407991 0.440413299201749, -0.408052961213528 0.4335155539480099, -0.4562445185301583 0.3806525946370402, -0.4564403733230182 0.3806297650158167))
11	110780000	114770000	11:110780000-114760000	151	-0.443664	0.457176	-3.54719	0.00147997	3	0.467612	POLYGON ((-0.4710365326686971 0.4571187421976178, -0.4303192078624443 0.4880170907134714, -0.3980010849131514 0.4488493591382979, -0.3996140287907703 0.4366609109270474, -0.408052961213528 0.4335155539480099, -0.46959260407991 0.440413299201749, -0.4729080487648092 0.4458233623522141, -0.4710365326686971 0.4571187421976178))
11	110780000	114770000	11:110780000-114760000	152	-0.463614	0.483465	-3.54719	0.0113198	3	0.482179	POLYGON ((-0.5107934673599827 0.5329576166736634, -0.4941366379828303 0.5416896091021706, -0.4881518335163892 0.5444538157479479, -0.4819202766470897 0.5466047276166164, -0.4755046313823653 0.5481207153208248, -0.4689694129069428 0.5489865342167776, -0.4623803388236159 0.5491934777030792, -0.4619391850981531 0.5491630231600675, -0.4619364372626077 0.5491814095904062, -0.435282632370021 0.51582983…
11	110780000	114770000	11:110780000-114760000	153	-0.496927	0.466001	-3.54719	0.0183196	3	0.469706	POLYGON ((-0.5610198587448546 0.4802888252097305, -0.5600043820348397 0.4845218705663011, -0.5578329903418613 0.4907445193313411, -0.5550494537801319 0.4967184814794389, -0.5516817489147825 0.5023837143499652, -0.5477637236268871 0.5076832782358714, -0.5433347569176624 0.5125639086691217, -0.5384393631208904 0.5169765517673016, -0.5331267445015166 0.520876857260782, -0.5274502967371349 0.52422562…
11	110780000	114770000	11:110780000-114760000	154	-0.496299	0.42492	-3.54719	0.00227995	3	0.458947	POLYGON ((-0.5196684978328032 0.4451081133923304, -0.4729080487648092 0.4458233623522141, -0.46959260407991 0.440413299201749, -0.4745352718055713 0.4042247631749797, -0.5105466700400557 0.4031539133890632, -0.5122864725992984 0.4053115999929587, -0.5196684978328032 0.4451081133923304))
11	110780000	114770000	11:110780000-114760000	155	-0.534243	0.417882	-3.54719	0.0135597	3	0.416165	POLYGON ((-0.5526530800537696 0.4063121727141651, -0.5566966691481511 0.4738224362006849, -0.5196684978328032 0.4451081133923304, -0.5122864725992984 0.4053115999929587, -0.5526530800537696 0.4063121727141651))
11	110780000	114770000	11:110780000-114760000	156	-0.495031	0.382273	-3.54719	0.0118198	3	0.345614	POLYGON ((-0.5222101557428237 0.3608053110374227, -0.5226429682867839 0.3615422332618893, -0.5105466700400557 0.4031539133890632, -0.4745352718055713 0.4042247631749797, -0.4564403733230182 0.3806297650158167, -0.4702160427108225 0.3596372852072829, -0.5222101557428237 0.3608053110374227))
11	110780000	114770000	11:110780000-114760000	157	-0.496022	0.338139	-1.25253	0.0296394	4	-0.391433	POLYGON ((-0.5012864070262947 0.3032626359163037, -0.5257337174413815 0.3389618332551224, -0.5222101557428237 0.3608053110374227, -0.4702160427108225 0.3596372852072829, -0.4662129242855941 0.3304503903824613, -0.4936784986834128 0.3003959976745749, -0.5012864070262947 0.3032626359163037))
11	110780000	114770000	11:110780000-114760000	158	-0.535707	0.310962	-3.54719	0.00717986	3	0.389186	POLYGON ((-0.5603119077620872 0.300925317493975, -0.5440317605778452 0.3297080967576912, -0.5257337174413815 0.3389618332551224, -0.5012864070262947 0.3032626359163037, -0.5591975917525042 0.2794633744281627, -0.5603119077620872 0.300925317493975))
11	110780000	114770000	11:110780000-114760000	159	-0.564387	0.327184	-3.54719	0.00227995	3	0.461126	POLYGON ((-0.5603119077620872 0.300925317493975, -0.5974079414007891 0.3431705249477153, -0.5789625290607928 0.347208986777219, -0.5440317605778452 0.3297080967576912, -0.5603119077620872 0.300925317493975))
11	110780000	114770000	11:110780000-114760000	160	-0.574088	0.371492	-3.54719	0.00665987	3	0.502561	POLYGON ((-0.636786609284688 0.3504908676103336, -0.6383063454614788 0.3574321639782034, -0.6392703362099704 0.3629514884208798, -0.6397608510158271 0.3685328516676085, -0.6397743268546262 0.3741357115506028, -0.6388867688913239 0.3961903764769434, -0.5603643376614178 0.3930303552583611, -0.5486125995204824 0.372395159591458, -0.5789625290607928 0.347208986777219, -0.5974079414007891 0.3431705249…
11	110780000	114770000	11:110780000-114760000	161	-0.572313	0.415602	-3.54719	0.0105398	3	0.619378	POLYGON ((-0.6388867688913239 0.3961903764769434, -0.6379992109280216 0.4182450414032841, -0.6374259967626715 0.4246549903973329, -0.6362287851891295 0.430978178282715, -0.6344190493902993 0.4371540083422372, -0.632014132524471 0.4431232960262176, -0.6290370815214267 0.4488288361330733, -0.6255164262178518 0.4542159510213113, -0.6214859059486563 0.4592330145992691, -0.6169841462143508 0.463831947…
11	110780000	114770000	11:110780000-114760000	162	-0.534839	0.393845	-3.54719	0.00591988	3	0.440073	POLYGON ((-0.5486125995204824 0.372395159591458, -0.5603643376614178 0.3930303552583611, -0.5526530800537696 0.4063121727141651, -0.5122864725992984 0.4053115999929587, -0.5105466700400557 0.4031539133890632, -0.5226429682867839 0.3615422332618893, -0.5486125995204824 0.372395159591458))
11	110780000	114770000	11:110780000-114760000	163	-0.554197	0.347523	-3.54719	0.00329993	3	0.452334	POLYGON ((-0.5440317605778452 0.3297080967576912, -0.5789625290607928 0.347208986777219, -0.5486125995204824 0.372395159591458, -0.5226429682867839 0.3615422332618893, -0.5222101557428237 0.3608053110374227, -0.5257337174413815 0.3389618332551224, -0.5440317605778452 0.3297080967576912))
11	110780000	114770000	11:110780000-114760000	164	-0.585824	0.30836	-3.54719	0.0190196	3	0.404607	POLYGON ((-0.650814718758465 0.3306436610711457, -0.6391294889069326 0.3468337394869321, -0.6369683375236279 0.349663300719133, -0.6366828256733423 0.3500168427002998, -0.636786609284688 0.3504908676103336, -0.5974079414007891 0.3431705249477153, -0.5603119077620872 0.300925317493975, -0.5591975917525042 0.2794633744281627, -0.5613207339180399 0.2754658186331045, -0.5700047931047345 0.27231889380…
11	110780000	114770000	11:110780000-114760000	165	-0.609194	0.27598	-3.54719	0.0110198	3	0.485628	POLYGON ((-0.6667581853458939 0.2387173954083962, -0.6722621049207835 0.2574286643579182, -0.6738142412066638 0.2638984415771634, -0.6747044766112278 0.270491970620177, -0.6749236924747182 0.2771417141281478, -0.6744696433743372 0.2837795589388561, -0.673346980124059 0.2903375137681516, -0.6715672021364535 0.2967484056430345, -0.6691485396344818 0.302946567952797, -0.6661157669197625 0.3088685130…
11	110780000	114770000	11:110780000-114760000	166	-0.598186	0.238558	-3.54719	0.00697986	3	0.495917	POLYGON ((-0.650526246672868 0.1941178971079234, -0.6584463431417281 0.2122811268653381, -0.6612542657710043 0.2200061264588743, -0.6667581853458939 0.2387173954083962, -0.5756255181055722 0.2655240685682475, -0.5800082510864051 0.2231548579886593, -0.6439504333072386 0.1952727985541748, -0.650526246672868 0.1941178971079234))
11	110780000	114770000	11:110780000-114760000	167	-0.581091	0.199353	-3.54719	0.000859983	3	0.524966	POLYGON ((-0.6439504333072386 0.1952727985541748, -0.5800082510864051 0.2231548579886593, -0.5607852164182517 0.211109862172715, -0.5686132491724952 0.1821455721310132, -0.6439504333072386 0.1952727985541748))
11	110780000	114770000	11:110780000-114760000	168	-0.549418	0.161475	-3.54719	0.00239995	3	0.459071	POLYGON ((-0.5542757869208258 0.1350075409590863, -0.5712965590003876 0.1510324654498718, -0.5653325936920713 0.1762378911085989, -0.5228672448613008 0.1758724577528732, -0.5193449691440963 0.17109583599518, -0.517328904708695 0.1494566524750399, -0.5195243972566634 0.1459745271159787, -0.5542757869208258 0.1350075409590863))
11	110780000	114770000	11:110780000-114760000	169	-0.501266	0.196982	-3.54719	0.0201196	3	0.324227	POLYGON ((-0.5228672448613008 0.1758724577528732, -0.5273488031474408 0.2101820957330105, -0.4840766048082282 0.2218802167902405, -0.4725850333173774 0.2169833416381073, -0.4729826927114071 0.1917248721177711, -0.5193449691440963 0.17109583599518, -0.5228672448613008 0.1758724577528732))
11	110780000	114770000	11:110780000-114760000	170	-0.51147	0.234726	-0.919914	0.00881982	4	-0.568554	POLYGON ((-0.5353345342243445 0.2497178157994854, -0.5018943820054941 0.2573566204668867, -0.4840766048082282 0.2218802167902405, -0.5273488031474408 0.2101820957330105, -0.5351856110257801 0.2168958605305746, -0.5353345342243445 0.2497178157994854))
11	110780000	114770000	11:110780000-114760000	171	-0.478024	0.251524	-3.54719	0.0354793	3	0.26106	POLYGON ((-0.5018943820054941 0.2573566204668867, -0.4872329107840469 0.2854848595835217, -0.4481856207025746 0.268164745942329, -0.4392033889317934 0.2464285898076182, -0.4465958875837257 0.2326773879108214, -0.4725850333173774 0.2169833416381073, -0.4840766048082282 0.2218802167902405, -0.5018943820054941 0.2573566204668867))
11	110780000	114770000	11:110780000-114760000	172	-0.520346	0.273584	-3.54719	0.0644987	3	0.2312	POLYGON ((-0.5613207339180399 0.2754658186331045, -0.5591975917525042 0.2794633744281627, -0.5012864070262947 0.3032626359163037, -0.4936784986834128 0.3003959976745749, -0.4872329107840469 0.2854848595835217, -0.5018943820054941 0.2573566204668867, -0.5353345342243445 0.2497178157994854, -0.5613207339180399 0.2754658186331045))
11	110780000	114770000	11:110780000-114760000	173	-0.559062	0.23451	-3.54719	0.00697986	3	0.396997	POLYGON ((-0.5756255181055722 0.2655240685682475, -0.5700047931047345 0.2723188938094661, -0.5613207339180399 0.2754658186331045, -0.5353345342243445 0.2497178157994854, -0.5351856110257801 0.2168958605305746, -0.5607852164182517 0.211109862172715, -0.5800082510864051 0.2231548579886593, -0.5756255181055722 0.2655240685682475))
11	110780000	114770000	11:110780000-114760000	174	-0.549166	0.190725	-3.54719	0.00353993	3	0.450165	POLYGON ((-0.5273488031474408 0.2101820957330105, -0.5228672448613008 0.1758724577528732, -0.5653325936920713 0.1762378911085989, -0.5686132491724952 0.1821455721310132, -0.5607852164182517 0.211109862172715, -0.5351856110257801 0.2168958605305746, -0.5273488031474408 0.2101820957330105))
11	110780000	114770000	11:110780000-114760000	175	-0.586176	0.170172	-3.54719	0.00605988	3	0.495917	POLYGON ((-0.6487527616297057 0.1900507476184009, -0.650526246672868 0.1941178971079234, -0.6439504333072386 0.1952727985541748, -0.5686132491724952 0.1821455721310132, -0.5653325936920713 0.1762378911085989, -0.5712965590003876 0.1510324654498718, -0.6484050371996047 0.1403328231003216, -0.6512918234137656 0.1611368541686851, -0.6518689271996932 0.167692350542906, -0.6517877262280166 0.174272699…
11	110780000	114770000	11:110780000-114760000	176	-0.580402	0.128564	-3.54719	0.00609988	3	0.619378	POLYGON ((-0.6056302508499571 0.06790960408394291, -0.6056323403035079 0.06792933061053338, -0.6097162843068736 0.06972209826270723, -0.6152812907381432 0.07284022755908774, -0.620517887511042 0.07648303981434909, -0.6253767682477496 0.08061623529429797, -0.629812183042405 0.08520089694902973, -0.6337823692298387 0.09019385684533661, -0.6372499446115222 0.09554810262428254, -0.6401822594362323 0.…
11	110780000	114770000	11:110780000-114760000	177	-0.535105	0.116123	-3.54719	0.0106798	3	0.390756	POLYGON ((-0.5638741736249955 0.1000600555856106, -0.5542757869208258 0.1350075409590863, -0.5195243972566634 0.1459745271159787, -0.5102517058689984 0.1047983931637179, -0.518859188390618 0.09383745482859392, -0.5638741736249955 0.1000600555856106))
11	110780000	114770000	11:110780000-114760000	178	-0.540542	0.0767946	-3.54719	0.0252595	3	0.403567	POLYGON ((-0.5242859374639177 0.01101789319186264, -0.5227316218977535 0.01289576582499892, -0.5315108505801455 0.01167816706794046, -0.5378699686362893 0.01110920953593118, -0.5442542882142347 0.01115979265429577, -0.5506035927793276 0.01182943932597426, -0.5568579960564988 0.01311183348211722, -0.5629585068741624 0.0149948796548833, -0.5688475855655495 0.01746081706119548, -0.5744696866795321 0…
11	110780000	114770000	11:110780000-114760000	179	-0.493357	0.0833387	-3.54719	0.0786184	3	0.267126	POLYGON ((-0.4657130438727258 0.05264684838997503, -0.4734661861551245 0.03396526160740965, -0.5090882325344103 0.02338612148916155, -0.518859188390618 0.09383745482859392, -0.5102517058689984 0.1047983931637179, -0.4846267812270507 0.1043717737537828, -0.4811739911052134 0.1024176145153525, -0.4657130438727258 0.05264684838997503))
11	110780000	114770000	11:110780000-114760000	180	-0.471089	0.122684	-3.54719	0.0422792	3	0.280467	POLYGON ((-0.4669182696758912 0.1497426602197683, -0.442235373892669 0.1168282051343934, -0.4811739911052134 0.1024176145153525, -0.4846267812270507 0.1043717737537828, -0.4789507037701937 0.1451678312728154, -0.4669182696758912 0.1497426602197683))
11	110780000	114770000	11:110780000-114760000	181	-0.488013	0.167196	-3.54719	0.0205196	3	0.304265	POLYGON ((-0.4729826927114071 0.1917248721177711, -0.4582671054628977 0.169587647559771, -0.4669182696758912 0.1497426602197683, -0.4789507037701937 0.1451678312728154, -0.517328904708695 0.1494566524750399, -0.5193449691440963 0.17109583599518, -0.4729826927114071 0.1917248721177711))
11	110780000	114770000	11:110780000-114760000	182	-0.444548	0.196089	-1.18864	0.0246795	4	-0.413552	POLYGON ((-0.4214370576360963 0.1731094033142307, -0.4582671054628977 0.169587647559771, -0.4729826927114071 0.1917248721177711, -0.4725850333173774 0.2169833416381073, -0.4465958875837257 0.2326773879108214, -0.413531833916159 0.1833152672510692, -0.4214370576360963 0.1731094033142307))
11	110780000	114770000	11:110780000-114760000	183	-0.41354	0.216859	-0.894921	0.0411192	4	-0.438253	POLYGON ((-0.4392033889317934 0.2464285898076182, -0.4010278409935761 0.247540699251342, -0.3789238369031011 0.2227798375057289, -0.4059008731388663 0.1858593936891787, -0.413531833916159 0.1833152672510692, -0.4465958875837257 0.2326773879108214, -0.4392033889317934 0.2464285898076182))
11	110780000	114770000	11:110780000-114760000	184	-0.374046	0.188001	-3.54719	0.247715	3	0.113128	POLYGON ((-0.330998325740905 0.1930800299872887, -0.3255821503936613 0.175815933581411, -0.3382144836336902 0.155784925722824, -0.3512895128232881 0.1523145182467107, -0.4059008731388663 0.1858593936891787, -0.3789238369031011 0.2227798375057289, -0.3608452852310134 0.2214819442445954, -0.330998325740905 0.1930800299872887))
11	110780000	114770000	11:110780000-114760000	185	-0.393409	0.156478	-3.54719	0.268255	3	0.108834	POLYGON ((-0.4214370576360963 0.1731094033142307, -0.413531833916159 0.1833152672510692, -0.4059008731388663 0.1858593936891787, -0.3512895128232881 0.1523145182467107, -0.3890353727008226 0.1197563283878632, -0.4113466946269966 0.1277373632356729, -0.4214370576360963 0.1731094033142307))
11	110780000	114770000	11:110780000-114760000	186	-0.439774	0.146167	-3.54719	0.120378	3	0.193456	POLYGON ((-0.4582671054628977 0.169587647559771, -0.4214370576360963 0.1731094033142307, -0.4113466946269966 0.1277373632356729, -0.4382762908901219 0.1152804043320786, -0.442235373892669 0.1168282051343934, -0.4669182696758912 0.1497426602197683, -0.4582671054628977 0.169587647559771))
11	110780000	114770000	11:110780000-114760000	187	-0.492652	0.125684	-3.54719	0.0139197	3	0.346261	POLYGON ((-0.4789507037701937 0.1451678312728154, -0.4846267812270507 0.1043717737537828, -0.5102517058689984 0.1047983931637179, -0.5195243972566634 0.1459745271159787, -0.517328904708695 0.1494566524750399, -0.4789507037701937 0.1451678312728154))
11	110780000	114770000	11:110780000-114760000	188	-0.460325	0.0935997	-3.54719	0.0376592	3	0.310684	POLYGON ((-0.4382762908901219 0.1152804043320786, -0.4378290794922214 0.07838556693611302, -0.4657130438727258 0.05264684838997503, -0.4811739911052134 0.1024176145153525, -0.442235373892669 0.1168282051343934, -0.4382762908901219 0.1152804043320786))
11	110780000	114770000	11:110780000-114760000	189	-0.415708	0.0941405	-3.54719	0.047719	3	0.25701	POLYGON ((-0.3890353727008226 0.1197563283878632, -0.3854860727294296 0.1058364411242933, -0.4032651883600493 0.0707063866698025, -0.4378290794922214 0.07838556693611302, -0.4382762908901219 0.1152804043320786, -0.4113466946269966 0.1277373632356729, -0.3890353727008226 0.1197563283878632))
11	110780000	114770000	11:110780000-114760000	190	-0.424461	0.0547458	-1.79669	0.0050399	4	-0.288827	POLYGON ((-0.4125891180621219 0.02262736072065569, -0.457900659482654 0.02570942831529448, -0.4734661861551245 0.03396526160740965, -0.4657130438727258 0.05264684838997503, -0.4378290794922214 0.07838556693611302, -0.4032651883600493 0.0707063866698025, -0.3913372960536913 0.04213976182748226, -0.4125891180621219 0.02262736072065569))
11	110780000	114770000	11:110780000-114760000	191	-0.377013	0.0745573	-1.2855	0.00395992	4	-0.515819	POLYGON ((-0.3482248993413029 0.03916682237593194, -0.3913372960536913 0.04213976182748226, -0.4032651883600493 0.0707063866698025, -0.3854860727294296 0.1058364411242933, -0.3371891700505911 0.07363182225841658, -0.3318012654312432 0.06355661126916587, -0.3471242205743041 0.03979140013391738, -0.3482248993413029 0.03916682237593194))
11	110780000	114770000	11:110780000-114760000	192	-0.353353	0.11004	-3.54719	0.308334	3	0.0905219	POLYGON ((-0.3371891700505911 0.07363182225841658, -0.3854860727294296 0.1058364411242933, -0.3890353727008226 0.1197563283878632, -0.3512895128232881 0.1523145182467107, -0.3382144836336902 0.155784925722824, -0.3321034090644957 0.1424288619028628, -0.3371891700505911 0.07363182225841658))
11	110780000	114770000	11:110780000-114760000	193	-0.315847	0.107267	-3.54719	0.101138	3	0.229837	POLYGON ((-0.3371891700505911 0.07363182225841658, -0.3321034090644957 0.1424288619028628, -0.2623193761878813 0.09103036613739951, -0.2902914549999714 0.07013041730695627, -0.3318012654312432 0.06355661126916587, -0.3371891700505911 0.07363182225841658))
11	110780000	114770000	11:110780000-114760000	194	-0.293702	0.137333	-1.65209	0.126997	4	-0.189148	POLYGON ((-0.3255821503936613 0.175815933581411, -0.2892046193638843 0.175367791540514, -0.2481944968707029 0.09542096162491402, -0.2623193761878813 0.09103036613739951, -0.3321034090644957 0.1424288619028628, -0.3382144836336902 0.155784925722824, -0.3255821503936613 0.175815933581411))
11	110780000	114770000	11:110780000-114760000	195	-0.255689	0.156833	-3.54719	0.215736	3	0.143713	POLYGON ((-0.2892046193638843 0.175367791540514, -0.2745224802983149 0.1849734807203843, -0.2306450482983481 0.1711413635340382, -0.2239793960129788 0.1580684617035433, -0.231006099151611 0.09729232004366255, -0.23687359621276 0.09484125051393411, -0.2481944968707029 0.09542096162491402, -0.2892046193638843 0.175367791540514))
11	110780000	114770000	11:110780000-114760000	196	-0.242955	0.197225	-3.54719	0.308734	3	0.0899242	POLYGON ((-0.2745224802983149 0.1849734807203843, -0.2649134946054561 0.2143790909452623, -0.234365929431331 0.2243269528475169, -0.2171519001542787 0.2077713709474638, -0.2306450482983481 0.1711413635340382, -0.2745224802983149 0.1849734807203843))
11	110780000	114770000	11:110780000-114760000	197	-0.20762	0.233966	-3.54719	0.270895	3	0.10609	POLYGON ((-0.234365929431331 0.2243269528475169, -0.2304170172166853 0.2515285370976324, -0.1752393729374218 0.2893202033882589, -0.1732667291244727 0.2863188798979044, -0.1670870220421347 0.2634931076183319, -0.2012967148579566 0.208786963324651, -0.2171519001542787 0.2077713709474638, -0.234365929431331 0.2243269528475169))
11	110780000	114770000	11:110780000-114760000	198	-0.17589	0.214125	-3.54719	0.237495	3	0.135216	POLYGON ((-0.1670870220421347 0.2634931076183319, -0.1279570983395858 0.2116739504660605, -0.1806131657895899 0.1898664719365661, -0.2012967148579566 0.208786963324651, -0.1670870220421347 0.2634931076183319))
11	110780000	114770000	11:110780000-114760000	199	-0.204356	0.183007	-3.54719	0.164537	3	0.191367	POLYGON ((-0.2012967148579566 0.208786963324651, -0.1806131657895899 0.1898664719365661, -0.1835231617679642 0.1713618281489418, -0.2239793960129788 0.1580684617035433, -0.2306450482983481 0.1711413635340382, -0.2171519001542787 0.2077713709474638, -0.2012967148579566 0.208786963324651))
11	110780000	114770000	11:110780000-114760000	200	-0.193389	0.14963	-0.7016	0.174697	4	-0.289908	POLYGON ((-0.2239793960129788 0.1580684617035433, -0.1835231617679642 0.1713618281489418, -0.1606329399980156 0.1425406203423832, -0.1641536878083788 0.1057097713965689, -0.164254482162063 0.1056246462585116, -0.2120257908715222 0.09515009054613333, -0.231006099151611 0.09729232004366255, -0.2239793960129788 0.1580684617035433))
11	110780000	114770000	11:110780000-114760000	201	-0.160122	0.176051	-0.345147	0.210456	4	-0.333895	POLYGON ((-0.1279570983395858 0.2116739504660605, -0.1244776848869387 0.2098612145948764, -0.1106221778199851 0.1929175080324212, -0.1606329399980156 0.1425406203423832, -0.1835231617679642 0.1713618281489418, -0.1806131657895899 0.1898664719365661, -0.1279570983395858 0.2116739504660605))
11	110780000	114770000	11:110780000-114760000	202	-0.127127	0.143296	-3.54719	0.208296	3	0.139852	POLYGON ((-0.1309260264294085 0.1063320857411511, -0.1641536878083788 0.1057097713965689, -0.1606329399980156 0.1425406203423832, -0.1106221778199851 0.1929175080324212, -0.07559795528544211 0.1770790704880337, -0.1309260264294085 0.1063320857411511))
11	110780000	114770000	11:110780000-114760000	203	-0.0959671	0.118927	-1.6295	0.454511	4	-0.0242107	POLYGON ((-0.0618900203986877 0.1757326608497081, -0.05546890869538813 0.1707109948887546, -0.05023114708845469 0.1661489322630823, -0.04550397083319613 0.1610596919756384, -0.04134015305437756 0.1555000891520172, -0.03542897578735222 0.1466709968779402, -0.03508951977636627 0.1467380804219516, -0.04086780334846001 0.1322360196785909, -0.04695163929386608 0.125828779851987, -0.1020641260922511 0.…
11	110780000	114770000	11:110780000-114760000	204	-0.0720071	0.0831395	-0.887618	0.408792	1	0.0595749	POLYGON ((-0.04695163929386608 0.125828779851987, -0.06742577203902388 0.06178850552574874, -0.1012304728895754 0.08563700951806835, -0.1020641260922511 0.08893034579117597, -0.04695163929386608 0.125828779851987))
11	110780000	114770000	11:110780000-114760000	205	-0.0918198	0.0425779	-3.54719	0.248015	2	-0.122706	POLYGON ((-0.06623973990229672 0.03670754902482256, -0.105872637188226 0.006130207645195816, -0.11140459268803 0.01119016740213424, -0.113997385932229 0.04949489912729384, -0.1103418982288368 0.05409519391113785, -0.06511544053869404 0.04651481123152384, -0.06623973990229672 0.03670754902482256))
11	110780000	114770000	11:110780000-114760000	206	-0.135041	0.0396523	-3.54719	0.307454	2	-0.0918557	POLYGON ((-0.113997385932229 0.04949489912729384, -0.11140459268803 0.01119016740213424, -0.1274285706317808 0.01304799848450544, -0.1526903821887223 0.04920699729069598, -0.1485945291480139 0.06025528511153269, -0.113997385932229 0.04949489912729384))
11	110780000	114770000	11:110780000-114760000	207	-0.172303	0.0534664	-3.54719	0.364953	3	0.0608203	POLYGON ((-0.1485945291480139 0.06025528511153269, -0.1526903821887223 0.04920699729069598, -0.179300442599037 0.02436902399107678, -0.2120257908715222 0.09515009054613333, -0.164254482162063 0.1056246462585116, -0.1485945291480139 0.06025528511153269))
11	110780000	114770000	11:110780000-114760000	208	-0.206001	0.0378866	-3.54719	0.100538	3	0.220614	POLYGON ((-0.23687359621276 0.09484125051393411, -0.231006099151611 0.09729232004366255, -0.2120257908715222 0.09515009054613333, -0.179300442599037 0.02436902399107678, -0.1825931801327789 0.002694063175149787, -0.1853428463581878 0.001348969650915362, -0.1931250526727233 0.001841564379245033, -0.233900496302329 0.03526790854517472, -0.23687359621276 0.09484125051393411))
11	110780000	114770000	11:110780000-114760000	209	-0.230995	0.00739629	-3.54719	0.135877	3	0.205704	POLYGON ((-0.1931250526727233 0.001841564379245033, -0.2442857090784992 -0.02465203325234674, -0.246211607479591 -0.02441663690110625, -0.2570655027542001 0.009403658827303849, -0.233900496302329 0.03526790854517472, -0.1931250526727233 0.001841564379245033))
11	110780000	114770000	11:110780000-114760000	210	-0.261923	0.0350958	-3.54719	0.278474	3	0.106854	POLYGON ((-0.2902914549999714 0.07013041730695627, -0.2623193761878813 0.09103036613739951, -0.2481944968707029 0.09542096162491402, -0.23687359621276 0.09484125051393411, -0.233900496302329 0.03526790854517472, -0.2570655027542001 0.009403658827303849, -0.2798483030821475 0.017539950911127, -0.2902914549999714 0.07013041730695627))
11	110780000	114770000	11:110780000-114760000	211	-0.277099	-0.00739953	-3.54719	0.177076	3	0.163898	POLYGON ((-0.246211607479591 -0.02441663690110625, -0.284426422609673 -0.05257680650965875, -0.3063839485111335 -0.02850188580374132, -0.3045634391607184 -0.001203449997328325, -0.2798483030821475 0.017539950911127, -0.2570655027542001 0.009403658827303849, -0.246211607479591 -0.02441663690110625))
11	110780000	114770000	11:110780000-114760000	212	-0.303122	0.0269146	-3.54719	0.0792184	3	0.243633	POLYGON ((-0.3471242205743041 0.03979140013391738, -0.3318012654312432 0.06355661126916587, -0.2902914549999714 0.07013041730695627, -0.2798483030821475 0.017539950911127, -0.3045634391607184 -0.001203449997328325, -0.3471242205743041 0.03979140013391738))
11	110780000	114770000	11:110780000-114760000	213	-0.332608	-0.00369768	-3.54719	0.051519	3	0.287076	POLYGON ((-0.3474815998422151 -0.02703331249299568, -0.3583435773392878 -0.002984318797245246, -0.3482248993413029 0.03916682237593194, -0.3471242205743041 0.03979140013391738, -0.3045634391607184 -0.001203449997328325, -0.3063839485111335 -0.02850188580374132, -0.3445238187598098 -0.03035074880283666, -0.3474815998422151 -0.02703331249299568))
11	110780000	114770000	11:110780000-114760000	214	-0.374823	-0.0227647	-3.54719	0.0318994	3	0.34254	POLYGON ((-0.3935943174565398 -0.0339574108530433, -0.4031504724272944 -0.02010566215983426, -0.4009663673800137 -0.01235222347961028, -0.3583435773392878 -0.002984318797245246, -0.3474815998422151 -0.02703331249299568, -0.3935943174565398 -0.0339574108530433))
11	110780000	114770000	11:110780000-114760000	215	-0.410723	-0.0475313	-3.54719	0.170277	3	0.194395	POLYGON ((-0.3912025017331525 -0.07701157183586919, -0.4466817797842471 -0.05033348618573591, -0.4387582264171827 -0.03613206448115689, -0.4031504724272944 -0.02010566215983426, -0.3935943174565398 -0.0339574108530433, -0.385564637122436 -0.07067889182887548, -0.3912025017331525 -0.07701157183586919))
11	110780000	114770000	11:110780000-114760000	216	-0.426418	-0.0801713	-3.54719	0.105658	3	0.301312	POLYGON ((-0.4036612449366588 -0.1418937859902543, -0.4037555220303122 -0.1418024796810358, -0.4058166819138281 -0.1425995280773612, -0.4121827100229353 -0.1443511677302388, -0.4186923352907696 -0.1454554024117488, -0.4376315211191765 -0.1476966728579747, -0.4489912186171394 -0.05170494538452786, -0.4466817797842471 -0.05033348618573591, -0.3912025017331525 -0.07701157183586919, -0.40366124493665…
11	110780000	114770000	11:110780000-114760000	217	-0.464296	-0.0846538	-3.54719	0.132857	3	0.357364	POLYGON ((-0.4376315211191765 -0.1476966728579747, -0.4565707069475834 -0.1499379433042006, -0.4633173356924043 -0.1503861961993445, -0.4700743222518983 -0.1501390874919606, -0.4767701866733007 -0.1491992312643142, -0.483334095594972 -0.1475765699483113, -0.489696611569384 -0.1452882691477607, -0.4957904276191863 -0.1423585360490604, -0.5015510792557253 -0.1388183633412835, -0.5069176264278038 -0…
11	110780000	114770000	11:110780000-114760000	218	-0.490339	-0.0510707	-1.05846	0.0224996	4	-0.706532	POLYGON ((-0.5292675542133652 -0.108148014612889, -0.5422890151799036 -0.09135647132548488, -0.5459288962394677 -0.08616362767487958, -0.549051505630869 -0.08064423731940251, -0.5516277868435367 -0.07484965930019734, -0.5536337670608592 -0.0688338133351554, -0.5550507802320809 -0.06265267808505896, -0.5558656407636715 -0.05636377026084524, -0.556070766213935 -0.05002560941900359, -0.5556642478491…
11	110780000	114770000	11:110780000-114760000	219	-0.463183	-0.0182615	-3.54719	0.127357	3	0.222727	POLYGON ((-0.5274039292950973 0.007250838638993302, -0.5242859374639177 0.01101789319186264, -0.5090882325344103 0.02338612148916155, -0.4734661861551245 0.03396526160740965, -0.457900659482654 0.02570942831529448, -0.4387582264171827 -0.03613206448115689, -0.4466817797842471 -0.05033348618573591, -0.4489912186171394 -0.05170494538452786, -0.4563240566027538 -0.05158198666405468, -0.5274039292950…
11	110780000	114770000	11:110780000-114760000	220	-0.428701	-0.00758772	-3.54719	0.0705586	3	0.269392	POLYGON ((-0.4031504724272944 -0.02010566215983426, -0.4387582264171827 -0.03613206448115689, -0.457900659482654 0.02570942831529448, -0.4125891180621219 0.02262736072065569, -0.4009663673800137 -0.01235222347961028, -0.4031504724272944 -0.02010566215983426))
11	110780000	114770000	11:110780000-114760000	221	-0.381599	0.00806293	-0.822294	0.00161997	4	-0.799684	POLYGON ((-0.3583435773392878 -0.002984318797245246, -0.4009663673800137 -0.01235222347961028, -0.4125891180621219 0.02262736072065569, -0.3913372960536913 0.04213976182748226, -0.3482248993413029 0.03916682237593194, -0.3583435773392878 -0.002984318797245246))
11	110780000	114770000	11:110780000-114760000	222	-0.372364	-0.0391436	-3.03361	0.0164397	3	0.18617	POLYGON ((-0.3577699450239039 -0.06412230127979132, -0.385564637122436 -0.07067889182887548, -0.3935943174565398 -0.0339574108530433, -0.3474815998422151 -0.02703331249299568, -0.3445238187598098 -0.03035074880283666, -0.3577699450239039 -0.06412230127979132))
11	110780000	114770000	11:110780000-114760000	223	-0.330086	-0.0557263	-3.54719	0.0104598	3	0.411707	POLYGON ((-0.3291162976699501 -0.08686475910687569, -0.3577699450239039 -0.06412230127979132, -0.3445238187598098 -0.03035074880283666, -0.3063839485111335 -0.02850188580374132, -0.284426422609673 -0.05257680650965875, -0.2849811310755489 -0.06819345728493131, -0.3155333636684631 -0.08778140983152395, -0.3291162976699501 -0.08686475910687569))
11	110780000	114770000	11:110780000-114760000	224	-0.359662	-0.0929899	-3.54719	0.0123198	3	0.467195	POLYGON ((-0.3926961912838692 -0.1525133176349203, -0.4036612449366588 -0.1418937859902543, -0.3912025017331525 -0.07701157183586919, -0.385564637122436 -0.07067889182887548, -0.3577699450239039 -0.06412230127979132, -0.3291162976699501 -0.08686475910687569, -0.3926961912838692 -0.1525133176349203))
11	110780000	114770000	11:110780000-114760000	225	-0.334261	-0.117591	-3.54719	0.0107598	3	0.584517	POLYGON ((-0.3083400654291785 -0.1815348061512126, -0.3292314280435529 -0.1831377113024864, -0.3354057450357573 -0.183320385540669, -0.3415699515165152 -0.1829227441694554, -0.3476696248396345 -0.1819482978914357, -0.3536509121103119 -0.1804056499137197, -0.359461005642445 -0.1783084199918027, -0.3650486091879879 -0.1756751241832471, -0.370364390822098 -0.1725290113728132, -0.3753614184856349 -0.…
11	110780000	114770000	11:110780000-114760000	226	-0.292478	-0.114385	-3.54719	0.0824784	3	0.343886	POLYGON ((-0.2585177430869284 -0.1747251822663621, -0.2798508882110103 -0.17890049205436, -0.2874487028148042 -0.1799319009999389, -0.3083400654291785 -0.1815348061512126, -0.3155333636684631 -0.08778140983152395, -0.2849811310755489 -0.06819345728493131, -0.2780645411433351 -0.07485362762217308, -0.2585177430869284 -0.1747251822663621))
11	110780000	114770000	11:110780000-114760000	227	-0.249812	-0.106034	-3.54719	0.295694	3	0.173996	POLYGON ((-0.1929278365893745 -0.1459111319217771, -0.2110687828257491 -0.1591445442203883, -0.21708996567687 -0.1630518198284344, -0.2235012405864223 -0.1662793575335601, -0.2302261752273651 -0.1687886800873406, -0.2371845979628465 -0.1705498724783643, -0.2585177430869284 -0.1747251822663621, -0.2780645411433351 -0.07485362762217308, -0.2381393702219502 -0.08393316415463727, -0.1929278365893745 …
11	110780000	114770000	11:110780000-114760000	228	-0.21353	-0.0795674	-2.54268	0.455851	2	-0.000227707	POLYGON ((-0.1512820886052951 -0.1006109573681711, -0.1513290568713034 -0.1006261677996147, -0.1520433604801499 -0.1028298646208768, -0.1545701296694715 -0.1086445600969599, -0.1576452684805153 -0.1141888154399702, -0.1612401757262268 -0.1194110647551999, -0.1653214159681118 -0.1242627370549028, -0.1698510304918671 -0.1286987080063261, -0.1747868903529998 -0.1326777196231657, -0.1929278365893745 …
11	110780000	114770000	11:110780000-114760000	229	-0.239106	-0.0589579	-3.54719	0.0388192	3	0.307832	POLYGON ((-0.2153946541821115 -0.05570731664249697, -0.2381393702219502 -0.08393316415463727, -0.2780645411433351 -0.07485362762217308, -0.2849811310755489 -0.06819345728493131, -0.284426422609673 -0.05257680650965875, -0.246211607479591 -0.02441663690110625, -0.2442857090784992 -0.02465203325234674, -0.2153946541821115 -0.05570731664249697))
11	110780000	114770000	11:110780000-114760000	230	-0.210443	-0.0322924	-1.00661	0.0126397	4	-0.601197	POLYGON ((-0.1925705389779357 -0.05719769319530127, -0.2153946541821115 -0.05570731664249697, -0.2442857090784992 -0.02465203325234674, -0.1931250526727233 0.001841564379245033, -0.1853428463581878 0.001348969650915362, -0.1925705389779357 -0.05719769319530127))
11	110780000	114770000	11:110780000-114760000	231	-0.169178	-0.0373866	-1.25977	0.381852	4	-0.0793342	POLYGON ((-0.1353472819861483 -0.09370726568387994, -0.1400799223421209 -0.09633572776951441, -0.1459192165168682 -0.09887421881734473, -0.1512820886052951 -0.1006109573681711, -0.1925705389779357 -0.05719769319530127, -0.1853428463581878 0.001348969650915362, -0.1825931801327789 0.002694063175149787, -0.1791916596898973 0.001705856385827431, -0.1149808001743227 -0.06732987661764679, -0.135347281…
11	110780000	114770000	11:110780000-114760000	232	-0.140926	-0.0111089	-3.54719	0.221456	2	-0.140404	POLYGON ((-0.09943921721079767 -0.05313206772144079, -0.1032574449201839 -0.05937048989255681, -0.1149808001743227 -0.06732987661764679, -0.1791916596898973 0.001705856385827431, -0.1274285706317808 0.01304799848450544, -0.11140459268803 0.01119016740213424, -0.105872637188226 0.006130207645195816, -0.09464975764326757 -0.03228133866476687, -0.09943921721079767 -0.05313206772144079))
11	110780000	114770000	11:110780000-114760000	233	-0.149791	0.0293475	-0.713598	0.144917	4	-0.332659	POLYGON ((-0.1274285706317808 0.01304799848450544, -0.1791916596898973 0.001705856385827431, -0.1825931801327789 0.002694063175149787, -0.179300442599037 0.02436902399107678, -0.1526903821887223 0.04920699729069598, -0.1274285706317808 0.01304799848450544))
11	110780000	114770000	11:110780000-114760000	234	-0.125746	0.0695364	-3.54719	0.365573	3	0.0651436	POLYGON ((-0.1012304728895754 0.08563700951806835, -0.1103418982288368 0.05409519391113785, -0.113997385932229 0.04949489912729384, -0.1485945291480139 0.06025528511153269, -0.164254482162063 0.1056246462585116, -0.1641536878083788 0.1057097713965689, -0.1309260264294085 0.1063320857411511, -0.1020641260922511 0.08893034579117597, -0.1012304728895754 0.08563700951806835))
11	110780000	114770000	11:110780000-114760000	235	-0.0890767	0.0589438	-3.54719	0.380352	2	-0.0558024	POLYGON ((-0.06274480198373772 0.05173087608229186, -0.06511544053869404 0.04651481123152384, -0.1103418982288368 0.05409519391113785, -0.1012304728895754 0.08563700951806835, -0.06742577203902388 0.06178850552574874, -0.06274480198373772 0.05173087608229186))
11	110780000	114770000	11:110780000-114760000	236	-0.051308	0.0765219	-3.54719	0.354893	2	-0.0763152	POLYGON ((-0.02840250876407292 0.06915916174363625, -0.0330069902258353 0.06016579124201474, -0.06274480198373772 0.05173087608229186, -0.06742577203902388 0.06178850552574874, -0.04695163929386608 0.125828779851987, -0.04086780334846001 0.1322360196785909, -0.02840250876407292 0.06915916174363625))
11	110780000	114770000	11:110780000-114760000	237	-0.0100195	0.0846813	-0.886727	0.253675	4	-0.266841	POLYGON ((-0.03508951977636627 0.1467380804219516, -0.02276456375876447 0.1491737472025869, -0.01650601567829924 0.1501002364560829, -0.01018738950186809 0.1504208135214786, -0.003867208568374696 0.1501325092026671, 0.002395989383062383 0.1492379937844359, 0.008544194391717804 0.147745552300195, 0.01452046156556533 0.1456690077957042, 0.02026943850687986 0.143027593299535, 0.0257378779881009 0.13…
11	110780000	114770000	11:110780000-114760000	238	-0.00903802	0.0548802	-3.54719	0.133057	2	-0.297028	POLYGON ((0.05617529657342909 0.07194475872993016, 0.05666605125067494 0.05704419925747342, 0.05656515819098832 0.0506457351569812, 0.05584263945412642 0.0442873950489291, 0.05450534129714512 0.03802942765574822, 0.05256593534567288 0.03193113061393608, 0.05004279852338251 0.02605028859677706, 0.04695983892066847 0.02044262577321019, 0.04334626925251828 0.01516127779109374, 0.03923633005218782 0.…
11	110780000	114770000	11:110780000-114760000	239	-0.0399949	0.0366367	-0.675227	0.392012	1	0.09483	POLYGON ((-0.0330069902258353 0.06016579124201474, 0.002927736158468856 -0.0008107180598193667, -0.03177272543910864 0.001060531680578061, -0.06623973990229672 0.03670754902482256, -0.06511544053869404 0.04651481123152384, -0.06274480198373772 0.05173087608229186, -0.0330069902258353 0.06016579124201474))
11	110780000	114770000	11:110780000-114760000	240	-0.0670521	0.0104752	-3.54719	0.124418	2	-0.22222	POLYGON ((-0.03177272543910864 0.001060531680578061, -0.09464975764326757 -0.03228133866476687, -0.105872637188226 0.006130207645195816, -0.06623973990229672 0.03670754902482256, -0.03177272543910864 0.001060531680578061))
11	110780000	114770000	11:110780000-114760000	241	-0.043773	-0.0334251	-0.547178	0.416892	1	0.0680151	POLYGON ((0.01673048519214602 -0.006240044223874486, 0.01616604683754229 -0.006572679497125228, 0.01694446657412348 -0.008224030236602176, 0.01904479880804204 -0.01404395003087266, 0.02058867372888586 -0.02003555350017603, 0.02156241527179061 -0.0261457653878441, 0.02195739776875561 -0.03232045977150957, 0.02227277949953694 -0.05108658767477206, -0.09943921721079767 -0.05313206772144079, -0.09464…
11	110780000	114770000	11:110780000-114760000	242	-0.0431423	-0.0709574	-1.2383	0.176376	1	0.26339	POLYGON ((0.02227277949953694 -0.05108658767477206, 0.02231089160276319 -0.05335436837986962, 0.02247732676677399 -0.05336430590845456, -0.01904754266672181 -0.09275570583061429, -0.05001450169470942 -0.0970226037007226, -0.1032574449201839 -0.05937048989255681, -0.09943921721079767 -0.05313206772144079, 0.02227277949953694 -0.05108658767477206))
11	110780000	114770000	11:110780000-114760000	243	-0.0722997	-0.112188	-0.666843	0.0363593	1	0.832785	POLYGON ((-0.0802393223563363 -0.1801427444361256, -0.07817307802892512 -0.1782453297030112, -0.08669797054344355 -0.1763317488078236, -0.0929221020804533 -0.1746095213139866, -0.09894722052346738 -0.1722849076518538, -0.1047151815210666 -0.1693803410988726, -0.1101703223747678 -0.1659238516663989, -0.1152599992021576 -0.1619487956009762, -0.1199350949674693 -0.1574935334857145, -0.12415049347694…
11	110780000	114770000	11:110780000-114760000	244	-0.0363492	-0.120258	-3.54719	0.000739985	2	-0.768474	POLYGON ((-0.05001450169470942 -0.0970226037007226, -0.01904754266672181 -0.09275570583061429, -0.01470604551237155 -0.1643449646067011, -0.06731541943428521 -0.1740971943299069, -0.05001450169470942 -0.0970226037007226))
11	110780000	114770000	11:110780000-114760000	245	0.0014508	-0.117966	-0.4946	0.00199996	1	1.44933	POLYGON ((0.02247732676677399 -0.05336430590845456, 0.02475629427863546 -0.0535003787445518, 0.01824514144771889 -0.1625501067580057, -0.001285731685599142 -0.1672404419285097, -0.01470604551237155 -0.1643449646067011, -0.01904754266672181 -0.09275570583061429, 0.02247732676677399 -0.05336430590845456))
11	110780000	114770000	11:110780000-114760000	246	0.0402254	-0.120281	-3.54719	0.000239995	2	-0.89055	POLYGON ((0.02475629427863546 -0.0535003787445518, 0.04414357014045059 -0.05465795628656862, 0.05150668010270841 -0.05551629039318653, 0.0587263438038985 -0.05719812920728325, 0.07667062514481243 -0.06246085889096361, 0.04832718641018952 -0.1591032230998265, 0.02711567712755185 -0.1642027791443861, 0.01824514144771889 -0.1625501067580057, 0.02475629427863546 -0.0535003787445518))
11	110780000	114770000	11:110780000-114760000	247	0.0761139	-0.130806	-1.42223	0.0130197	1	0.701198	POLYGON ((0.07667062514481243 -0.06246085889096361, 0.09461490648572637 -0.06772358857464397, 0.09920743150854591 -0.06925628370850977, 0.1036746999891116 -0.07112281867500356, 0.1196302801341636 -0.07849083240507081, 0.08377385424157535 -0.1561386351920898, 0.0642296903066721 -0.1632499894064484, 0.04832718641018952 -0.1591032230998265, 0.07667062514481243 -0.06246085889096361))
11	110780000	114770000	11:110780000-114760000	248	0.108025	-0.145542	-0.697651	0.121138	1	0.922895	POLYGON ((0.1196302801341636 -0.07849083240507081, 0.1355858602792156 -0.08585884613513806, 0.1414649363099029 -0.08894294433221583, 0.1470029739084395 -0.09260427417545794, 0.1521434930600821 -0.09680549536880337, 0.156834067866251 -0.1015037615012775, 0.1610268612132586 -0.1066511570187319, 0.1646791126420361 -0.1121951858935496, 0.1677535744432869 -0.1180793070085905, 0.1702188915305255 -0.124…
11	110780000	114770000	11:110780000-114760000	249	0.0941846	-0.18047	-1.00065	0.0123798	1	1.03412	POLYGON ((0.1622211824782405 -0.1872240070768679, 0.1553009675560603 -0.2046879246224186, 0.1527710504349005 -0.2102919210603673, 0.1497286335618285 -0.2156350433953814, 0.1462003312679246 -0.2206705512783373, 0.1422170082930712 -0.2253543952973546, 0.1378135097886315 -0.2296456023114564, 0.1330283565004463 -0.2335066338737528, 0.1279034077986131 -0.2369037146087453, 0.1224834955017849 -0.2398071…
11	110780000	114770000	11:110780000-114760000	250	0.0587577	-0.197366	-0.825511	0.000639987	1	1.20993	POLYGON ((0.1047700316661117 -0.2482549828122205, 0.09719354031838411 -0.2518683416660647, 0.06162016995337601 -0.2604996331352257, 0.06133108521089715 -0.2603783422536779, 0.02711567712755185 -0.1642027791443861, 0.04832718641018952 -0.1591032230998265, 0.0642296903066721 -0.1632499894064484, 0.1047700316661117 -0.2482549828122205))
11	110780000	114770000	11:110780000-114760000	251	0.0235286	-0.209899	-0.536126	0.0108398	1	0.95693	POLYGON ((0.01824514144771889 -0.1625501067580057, 0.02711567712755185 -0.1642027791443861, 0.06133108521089715 -0.2603783422536779, 0.00563248888159704 -0.2549990163005976, -0.001285731685599142 -0.1672404419285097, 0.01824514144771889 -0.1625501067580057))
11	110780000	114770000	11:110780000-114760000	252	-0.0191093	-0.21326	-0.445881	0.0396992	1	0.830249	POLYGON ((-0.01470604551237155 -0.1643449646067011, -0.001285731685599142 -0.1672404419285097, 0.00563248888159704 -0.2549990163005976, -0.001595113535680717 -0.2577206688534194, -0.006683367986136097 -0.2575271742716678, -0.07808964146334663 -0.1797672597211569, -0.06731541943428521 -0.1740971943299069, -0.01470604551237155 -0.1643449646067011))
11	110780000	114770000	11:110780000-114760000	253	-0.0497334	-0.241382	-0.757943	0.00347993	1	1.04436	POLYGON ((-0.110083567875432 -0.2083970674826896, -0.09560764388798329 -0.1942942175610833, -0.09419806205877851 -0.1929609373360461, -0.0802393223563363 -0.1801427444361256, -0.07808964146334663 -0.1797672597211569, -0.006683367986136097 -0.2575271742716678, -0.04503270278965649 -0.2751687755795603, -0.110083567875432 -0.2083970674826896))
11	110780000	114770000	11:110780000-114760000	254	-0.0786852	-0.269588	-3.54719	0.0219196	2	-0.491732	POLYGON ((-0.1212924379409462 -0.216095471191641, -0.1155306466838124 -0.2137037639679956, -0.110083567875432 -0.2083970674826896, -0.04503270278965649 -0.2751687755795603, -0.04835145169530909 -0.2811645976238225, -0.08753074161480169 -0.297429776994127, -0.1212924379409462 -0.216095471191641))
11	110780000	114770000	11:110780000-114760000	255	-0.113493	-0.284036	-0.719225	0.0852183	1	0.580041	POLYGON ((-0.1750278535380502 -0.2538455004904839, -0.1619035491989194 -0.2395602063244324, -0.1567992638928637 -0.2345765062763889, -0.1511850184433767 -0.2301752288836996, -0.1451269243453676 -0.2264082021311863, -0.1386963197084229 -0.2233197852782033, -0.1212924379409462 -0.216095471191641, -0.08753074161480169 -0.297429776994127, -0.09204584266157576 -0.306182901967803, -0.1100403844298413 -…
11	110780000	114770000	11:110780000-114760000	256	-0.139759	-0.312626	-0.840744	0.0659187	1	0.528558	POLYGON ((-0.1100403844298413 -0.3135687486511995, -0.1285594610876417 -0.3500291484111523, -0.1803444978590617 -0.3008827711247993, -0.1750241887216154 -0.2538662871739575, -0.1100403844298413 -0.3135687486511995))
11	110780000	114770000	11:110780000-114760000	257	-0.166497	-0.340799	-3.54719	0.00285994	2	-0.549683	POLYGON ((-0.1285594610876417 -0.3500291484111523, -0.1283159691435694 -0.354833360987924, -0.1557743868589471 -0.3851733468590375, -0.1846837751501448 -0.3736946436807361, -0.1881359384042292 -0.3125121896337579, -0.1803444978590617 -0.3008827711247993, -0.1285594610876417 -0.3500291484111523))
11	110780000	114770000	11:110780000-114760000	258	-0.206456	-0.343054	-0.770425	0.00155997	1	0.99676	POLYGON ((-0.2283573233034055 -0.3287569610775156, -0.1881359384042292 -0.3125121896337579, -0.1846837751501448 -0.3736946436807361, -0.2026925398369243 -0.3770357632596533, -0.2357744325061452 -0.3595459205110124, -0.2283573233034055 -0.3287569610775156))
11	110780000	114770000	11:110780000-114760000	259	-0.222528	-0.30326	-0.696837	0.00223996	1	1.37556	POLYGON ((-0.2820799874444714 -0.2682137821973572, -0.2661604730406747 -0.2540876867160327, -0.2609977735792196 -0.2499515699022612, -0.2554455335565039 -0.2463552441722102, -0.2495599740802764 -0.2433351253536433, -0.2434006913985599 -0.2409217946939161, -0.2370300534374322 -0.2391396891990837, -0.230512568273233 -0.238006854188627, -0.2239142309339454 -0.2375347605713907, -0.2173018551439395 -0…
11	110780000	114770000	11:110780000-114760000	260	-0.254367	-0.331512	-2.12042	0.00173997	1	0.268631	POLYGON ((-0.2921029500801847 -0.2737405358404825, -0.286590408755399 -0.2722160802878045, -0.2820799874444714 -0.2682137821973572, -0.2283573233034055 -0.3287569610775156, -0.2357744325061452 -0.3595459205110124, -0.2402898353073263 -0.3611212439782446, -0.2710608873157868 -0.3498301537658507, -0.2921029500801847 -0.2737405358404825))
11	110780000	114770000	11:110780000-114760000	261	-0.294795	-0.342692	-0.551877	0.00445991	1	1.1803	POLYGON ((-0.3131555551510556 -0.2760549001206194, -0.3022544047671349 -0.2765478511155082, -0.2921029500801847 -0.2737405358404825, -0.2710608873157868 -0.3498301537658507, -0.2910829934002342 -0.3652785043269018, -0.3158045070676994 -0.3346339952082044, -0.3131555551510556 -0.2760549001206194))
11	110780000	114770000	11:110780000-114760000	262	-0.337456	-0.340763	-3.54719	0.00953981	2	-0.673775	POLYGON ((-0.4028786623673646 -0.3215866402834798, -0.3933892693814846 -0.3062206948992202, -0.3897963504367825 -0.3009862367558147, -0.3857152513828436 -0.2961227761452822, -0.3811840366814491 -0.2916756746254011, -0.3762449690286387 -0.2876864103675178, -0.3709441151700172 -0.2841921912891255, -0.3653309162356439 -0.2812256080151532, -0.3594577266019953 -0.2788143299048006, -0.3533793255820433 …
11	110780000	114770000	11:110780000-114760000	263	-0.356435	-0.371495	-1.75413	0.00967981	1	0.486648	POLYGON ((-0.4104290500251582 -0.4107362589310224, -0.410112569713092 -0.4094329866952345, -0.4134748021720106 -0.4041770840106219, -0.4163879211389344 -0.3984635981743935, -0.4187304582450401 -0.3924934472196228, -0.4204801192972342 -0.3863234497545772, -0.4216202525715185 -0.38001232634958, -0.422140007289349 -0.3736201406866377, -0.4220344368857339 -0.3672077279265205, -0.421304546086258 -0.36…
11	110780000	114770000	11:110780000-114760000	264	-0.321618	-0.404434	-3.54719	0.000399992	2	-0.638129	POLYGON ((-0.3287353112286016 -0.4265731474883122, -0.3450003528176528 -0.4129615658616191, -0.3145863208302859 -0.381122024818051, -0.2990102301841222 -0.3841497473221921, -0.2898787787401776 -0.3998935998198433, -0.2985520933790662 -0.4255163417432173, -0.3287353112286016 -0.4265731474883122))
11	110780000	114770000	11:110780000-114760000	265	-0.320087	-0.44816	-1.16514	0.0049399	1	0.722727	POLYGON ((-0.3410222990275807 -0.4601523277315055, -0.3287353112286016 -0.4265731474883122, -0.2985520933790662 -0.4255163417432173, -0.2837276132410463 -0.456276917173721, -0.2859607925659716 -0.4675694490901344, -0.3054728169089491 -0.476399661321839, -0.3410222990275807 -0.4601523277315055))
11	110780000	114770000	11:110780000-114760000	266	-0.267423	-0.422779	-1.18979	0.00097998	1	0.732835	POLYGON ((-0.2898787787401776 -0.3998935998198433, -0.258605095385594 -0.3981062261540513, -0.2326345960303281 -0.4282813240251204, -0.2337369996400705 -0.4306634921833888, -0.2837276132410463 -0.456276917173721, -0.2985520933790662 -0.4255163417432173, -0.2898787787401776 -0.3998935998198433))
11	110780000	114770000	11:110780000-114760000	267	-0.247015	-0.46261	-3.54719	0.000579988	2	-0.621302	POLYGON ((-0.2242040491752272 -0.465112516306602, -0.2439065762579584 -0.4866301102291986, -0.2716781378721548 -0.4829975983594001, -0.2859607925659716 -0.4675694490901344, -0.2837276132410463 -0.456276917173721, -0.2337369996400705 -0.4306634921833888, -0.2242040491752272 -0.465112516306602))
11	110780000	114770000	11:110780000-114760000	268	-0.205924	-0.45124	-1.46826	0.0248195	1	0.413921	POLYGON ((-0.2013972072316151 -0.473753716735935, -0.2242040491752272 -0.465112516306602, -0.2337369996400705 -0.4306634921833888, -0.2326345960303281 -0.4282813240251204, -0.2232525875874602 -0.4239321505938562, -0.1731604340718564 -0.4384344140192008, -0.2013972072316151 -0.473753716735935))
11	110780000	114770000	11:110780000-114760000	269	-0.194016	-0.410106	-0.459433	0.0146797	1	0.888571	POLYGON ((-0.2026925398369243 -0.3770357632596533, -0.1846837751501448 -0.3736946436807361, -0.1557743868589471 -0.3851733468590375, -0.1531720973992257 -0.3968022299134774, -0.1629354053253194 -0.435910552365547, -0.1731604340718564 -0.4384344140192008, -0.2232525875874602 -0.4239321505938562, -0.2026925398369243 -0.3770357632596533))
11	110780000	114770000	11:110780000-114760000	270	-0.232894	-0.393061	-0.621638	0.000359993	1	1.16246	POLYGON ((-0.2026925398369243 -0.3770357632596533, -0.2232525875874602 -0.4239321505938562, -0.2326345960303281 -0.4282813240251204, -0.258605095385594 -0.3981062261540513, -0.2402898353073263 -0.3611212439782446, -0.2357744325061452 -0.3595459205110124, -0.2026925398369243 -0.3770357632596533))
11	110780000	114770000	11:110780000-114760000	271	-0.270177	-0.374598	-1.24422	0.00167997	1	0.724368	POLYGON ((-0.2990102301841222 -0.3841497473221921, -0.2910829934002342 -0.3652785043269018, -0.2710608873157868 -0.3498301537658507, -0.2402898353073263 -0.3611212439782446, -0.258605095385594 -0.3981062261540513, -0.2898787787401776 -0.3998935998198433, -0.2990102301841222 -0.3841497473221921))
11	110780000	114770000	11:110780000-114760000	272	-0.312373	-0.356873	-1.19584	0.00287994	1	0.787499	POLYGON ((-0.3145863208302859 -0.381122024818051, -0.3337287346652367 -0.3662184855405933, -0.3345333009846463 -0.3637940005664967, -0.3158045070676994 -0.3346339952082044, -0.2910829934002342 -0.3652785043269018, -0.2990102301841222 -0.3841497473221921, -0.3145863208302859 -0.381122024818051))
11	110780000	114770000	11:110780000-114760000	273	-0.337552	-0.389214	-0.68325	0.0342793	1	0.733575	POLYGON ((-0.3450003528176528 -0.4129615658616191, -0.3715433483998145 -0.4065159934828486, -0.3337287346652367 -0.3662184855405933, -0.3145863208302859 -0.381122024818051, -0.3450003528176528 -0.4129615658616191))
11	110780000	114770000	11:110780000-114760000	274	-0.349273	-0.43748	-0.34611	0.104618	1	0.640829	POLYGON ((-0.4061698294527543 -0.4782610065014085, -0.4126115803953813 -0.4550862530664049, -0.4140736052126107 -0.4485539380693859, -0.4148637620803079 -0.4419068102753007, -0.414973858433816 -0.4352137889411488, -0.4144027527637317 -0.4285442691608298, -0.41315636645139 -0.4219674023576419, -0.4104290500251582 -0.4107362589310224, -0.3715433483998145 -0.4065159934828486, -0.3450003528176528 -0.…
11	110780000	114770000	11:110780000-114760000	275	-0.33639	-0.48383	-3.54719	0.0865783	2	-0.392828	POLYGON ((-0.3455782775488294 -0.5531957969445817, -0.3668213084058692 -0.5421019895413811, -0.3726130528901003 -0.5386896119732424, -0.378026039386388 -0.5347036112169499, -0.3830036686401373 -0.5301856656827079, -0.3874938935779614 -0.5251830159002526, -0.3914497635221485 -0.5197479705625545, -0.3948299151162097 -0.5139373595758059, -0.3975990048282935 -0.5078119398347115, -0.3997280785101273 -…
11	110780000	114770000	11:110780000-114760000	276	-0.293904	-0.506018	-1.09631	0.159417	1	0.378365	POLYGON ((-0.2783543492292093 -0.5730898105192028, -0.2987619558099435 -0.5715775211485863, -0.3054010026057311 -0.5707440846964659, -0.3119209407752727 -0.5692401016707189, -0.3182542257652338 -0.5670811528727356, -0.3243352466917897 -0.5642896043477821, -0.3455782775488294 -0.5531957969445817, -0.3054728169089491 -0.476399661321839, -0.2859607925659716 -0.4675694490901344, -0.2716781378721548 -…
11	110780000	114770000	11:110780000-114760000	277	-0.253088	-0.509042	-3.54719	0.0686586	2	-0.39988	POLYGON ((-0.2008870974073416 -0.553652546638464, -0.217578013237689 -0.5643658918856652, -0.2228158402175842 -0.5673969014717117, -0.2283101954304757 -0.5699334170692584, -0.2340145200887903 -0.5719539444198696, -0.2398804761383392 -0.5734413617139686, -0.2458583558716588 -0.5743830646798721, -0.2518975031476995 -0.57477107339152, -0.2579467426484754 -0.5746020998898194, -0.2783543492292093 -0.5…
11	110780000	114770000	11:110780000-114760000	278	-0.219707	-0.487615	-0.508758	0.0148997	1	1.03692	POLYGON ((-0.1774114711304863 -0.5424829611608883, -0.190722951908975 -0.547128518779621, -0.2008870974073416 -0.553652546638464, -0.2439065762579584 -0.4866301102291986, -0.2242040491752272 -0.465112516306602, -0.2013972072316151 -0.473753716735935, -0.1774114711304863 -0.5424829611608883))
11	110780000	114770000	11:110780000-114760000	279	-0.178439	-0.473213	-0.838722	0.0783184	1	0.598462	POLYGON ((-0.1564769012568887 -0.5378391735624176, -0.1655412510084548 -0.5383403873600044, -0.1774114711304863 -0.5424829611608883, -0.2013972072316151 -0.473753716735935, -0.1731604340718564 -0.4384344140192008, -0.1629354053253194 -0.435910552365547, -0.1620540337223635 -0.436977865431498, -0.1564769012568887 -0.5378391735624176))
11	110780000	114770000	11:110780000-114760000	280	-0.141774	-0.471186	-3.54719	0.137337	2	-0.29192	POLYGON ((-0.07203986980554791 -0.4751023288831053, -0.08124007781579499 -0.496824576409405, -0.08414494316511517 -0.5028180377971714, -0.08764133895208261 -0.5084868153201656, -0.09169337669984357 -0.5137727222617461, -0.09625946458876966 -0.5186215018499446, -0.101292734372387 -0.522983384171793, -0.1067415224527696 -0.5268135970326414, -0.1125499001774369 -0.5300728255167949, -0.11865824791456…
11	110780000	114770000	11:110780000-114760000	281	-0.123374	-0.427742	-1.03514	0.0540189	1	0.542762	POLYGON ((-0.05936173243051283 -0.4438990740407343, -0.06138381792041164 -0.4496266666539888, -0.06283966179530084 -0.4533800813568056, -0.07203986980554791 -0.4751023288831053, -0.1620540337223635 -0.436977865431498, -0.1629354053253194 -0.435910552365547, -0.1531720973992257 -0.3968022299134774, -0.08200895105539613 -0.4219258682994201, -0.05936173243051283 -0.4438990740407343))
11	110780000	114770000	11:110780000-114760000	282	-0.110554	-0.391429	-3.54719	0.0195596	2	-0.444886	POLYGON ((-0.1283159691435694 -0.354833360987924, -0.1012337508046876 -0.3641916233244298, -0.08200895105539613 -0.4219258682994201, -0.1531720973992257 -0.3968022299134774, -0.1557743868589471 -0.3851733468590375, -0.1283159691435694 -0.354833360987924))
11	110780000	114770000	11:110780000-114760000	283	-0.0774453	-0.380404	-3.54719	0.289474	2	-0.122887	POLYGON ((-0.01144479007665422 -0.3671396774623515, -0.01311964150879028 -0.3670506107219724, -0.01219785369047073 -0.3723743631960088, -0.01172526840868954 -0.3787960184985421, -0.01188317867610664 -0.3852331030886773, -0.01267006955521485 -0.3916238617617526, -0.01407839188200907 -0.3979069837482307, -0.01609463469010337 -0.4040221909084109, -0.01869945483035656 -0.4099108160204419, -0.02186786…
11	110780000	114770000	11:110780000-114760000	284	-0.0917497	-0.337011	-0.78126	0.0859383	1	0.513604	POLYGON ((-0.1012337508046876 -0.3641916233244298, -0.1283159691435694 -0.354833360987924, -0.1285594610876417 -0.3500291484111523, -0.1100403844298413 -0.3135687486511995, -0.09204584266157576 -0.306182901967803, -0.05494950639778946 -0.3489343204030417, -0.1012337508046876 -0.3641916233244298))
11	110780000	114770000	11:110780000-114760000	285	-0.0615673	-0.310821	-3.54719	0.0098798	2	-0.497869	POLYGON ((-0.05494950639778946 -0.3489343204030417, -0.09204584266157576 -0.306182901967803, -0.08753074161480169 -0.297429776994127, -0.04835145169530909 -0.2811645976238225, -0.02935573723050783 -0.3547744642472728, -0.05494950639778946 -0.3489343204030417))
11	110780000	114770000	11:110780000-114760000	286	-0.0224353	-0.300723	-3.54719	0.00133997	2	-0.642326	POLYGON ((-0.007425262180437174 -0.3673534314949241, -0.01144479007665422 -0.3671396774623515, -0.02935573723050783 -0.3547744642472728, -0.04835145169530909 -0.2811645976238225, -0.04503270278965649 -0.2751687755795603, -0.006683367986136097 -0.2575271742716678, -0.001595113535680717 -0.2577206688534194, -0.007425262180437174 -0.3673534314949241))
11	110780000	114770000	11:110780000-114760000	287	0.0145668	-0.30269	-0.742151	0.0113598	1	0.852262	POLYGON ((-0.005329211054681468 -0.368063921063044, -0.006343743967112234 -0.3674109454332193, -0.007425262180437174 -0.3673534314949241, -0.001595113535680717 -0.2577206688534194, 0.00563248888159704 -0.2549990163005976, 0.06133108521089715 -0.2603783422536779, 0.06162016995337601 -0.2604996331352257, 0.06053522522701683 -0.2657298747152252, -0.005329211054681468 -0.368063921063044))
11	110780000	114770000	11:110780000-114760000	288	0.045933	-0.322878	-0.462144	0.0818384	1	0.665594	POLYGON ((0.02715158687382041 -0.3859112854889925, 0.02718089388567755 -0.3858490141341827, 0.02185412632552211 -0.3840495104550048, 0.01595889749675034 -0.3813869478039877, 0.01035387952516652 -0.3781579020699674, -0.005329211054681468 -0.368063921063044, 0.06053522522701683 -0.2657298747152252, 0.07091024037888177 -0.353862327720912, 0.05482555673985499 -0.3740440944599632, 0.02715158687382041 …
11	110780000	114770000	11:110780000-114760000	289	0.0880094	-0.317925	-0.44628	0.00683986	1	1.35801	POLYGON ((0.09719354031838411 -0.2518683416660647, 0.09548669595355168 -0.252682365059578, 0.1000552534076874 -0.2532983974189894, 0.1064776329298072 -0.2548328028662145, 0.1246726808431683 -0.2601588092326972, 0.1002491677624498 -0.3435959965242599, 0.07091024037888177 -0.353862327720912, 0.06053522522701683 -0.2657298747152252, 0.06162016995337601 -0.2604996331352257, 0.09719354031838411 -0.251…
11	110780000	114770000	11:110780000-114760000	290	0.1244	-0.328577	-2.41946	0.000619988	1	0.0911775	POLYGON ((0.1246726808431683 -0.2601588092326972, 0.1428677287565294 -0.2654848155991799, 0.1489992558815441 -0.2676134707948217, 0.1548909917384673 -0.2703363821813656, 0.1604855053298423 -0.2736270075782535, 0.1657282628979383 -0.2774532708871355, 0.1705681595046062 -0.2817778747607277, 0.1749580171879589 -0.2865586641669486, 0.1788550448399817 -0.2917490373044112, 0.1822212553223158 -0.2972983…
11	110780000	114770000	11:110780000-114760000	291	0.106686	-0.371298	0	0.0125997	1	1.41788	POLYGON ((0.1379527338096628 -0.4131665637153215, 0.05482555673985499 -0.3740440944599632, 0.07091024037888177 -0.353862327720912, 0.1002491677624498 -0.3435959965242599, 0.1633227739535714 -0.3697491742433071, 0.1529769635482026 -0.3972928928830446, 0.1379527338096628 -0.4131665637153215))
11	110780000	114770000	11:110780000-114760000	292	0.0857615	-0.415757	-3.54719	0.000399992	2	-0.827346	POLYGON ((0.0165691838656322 -0.4156163095362631, 0.02334410652066528 -0.3951227558477007, 0.02628001512384762 -0.3877631956717605, 0.02715158687382041 -0.3859112854889925, 0.05482555673985499 -0.3740440944599632, 0.1379527338096628 -0.4131665637153215, 0.1352933443332803 -0.4228344007165092, 0.114681399398723 -0.4445839380644186, 0.108538744154265 -0.4460203413133697, 0.0165691838656322 -0.41561…
11	110780000	114770000	11:110780000-114760000	293	0.0722116	-0.456744	-2.8412	0.00851983	2	-0.227812	POLYGON ((0.04280515868926221 -0.5187735613445852, 0.02813946068109396 -0.5055228912985004, 0.02365456838942111 -0.5010604247765139, 0.01961941396805639 -0.4961875000773736, 0.01607137121576796 -0.4909492504693763, 0.01304330227908084 -0.4853941928780977, 0.01056325328145878 -0.479573778520241, 0.008654194558728942 -0.4735419163599359, 0.007333807906701337 -0.4673544738012613, 0.00661432281150621…
11	110780000	114770000	11:110780000-114760000	294	0.101543	-0.483246	-0.472111	0.241235	1	0.388989	POLYGON ((0.1285000186789113 -0.5441557452734284, 0.1181222225947307 -0.5468603935444695, 0.1117554061057488 -0.5481872594642574, 0.1052886401414982 -0.5488785360638008, 0.09878521550203267 -0.5489274577589907, 0.09230878176904397 -0.548333545748948, 0.0859227243618781 -0.5471026127020893, 0.07968954417893219 -0.5452467058670361, 0.07367024589593435 -0.5427839891651464, 0.06792374090788482 -0.539…
11	110780000	114770000	11:110780000-114760000	295	0.145019	-0.471915	-0.864868	0.00399992	1	1.05604	POLYGON ((0.114681399398723 -0.4445839380644186, 0.1352933443332803 -0.4228344007165092, 0.1783854585259468 -0.4755024104706844, 0.1786192342409841 -0.476873628487063, 0.1383450830311241 -0.5353820229640454, 0.114681399398723 -0.4445839380644186))
11	110780000	114770000	11:110780000-114760000	296	0.181476	-0.442086	-0.243544	0.00135997	1	1.46891	POLYGON ((0.1352933443332803 -0.4228344007165092, 0.1379527338096628 -0.4131665637153215, 0.1529769635482026 -0.3972928928830446, 0.2022084537836774 -0.4313764919030458, 0.2043202474382095 -0.4383241669928678, 0.1783854585259468 -0.4755024104706844, 0.1352933443332803 -0.4228344007165092))
11	110780000	114770000	11:110780000-114760000	297	0.225394	-0.428737	-0.693065	0.000159997	1	1.55439	POLYGON ((0.2837969228934555 -0.4656751748605311, 0.2736024543103998 -0.4741495859966671, 0.2043202474382095 -0.4383241669928678, 0.2022084537836774 -0.4313764919030458, 0.2312414611321291 -0.4024524924597191, 0.2837969228934555 -0.4656751748605311))
11	110780000	114770000	11:110780000-114760000	298	0.258152	-0.401506	-0.431524	5.99988e-05	1	1.88368	POLYGON ((0.3036422707708813 -0.4488706488437675, 0.30362159660761 -0.4488657878162037, 0.3001761862502595 -0.4520594958614991, 0.2837969228934555 -0.4656751748605311, 0.2312414611321291 -0.4024524924597191, 0.2312274204368086 -0.4023408984803497, 0.2637651880817792 -0.381074875957658, 0.2902257108556563 -0.4016681771271349, 0.3036422707708813 -0.4488706488437675))
11	110780000	114770000	11:110780000-114760000	299	0.282192	-0.370617	-0.77717	7.99984e-05	1	1.68938	POLYGON ((0.2923219707523885 -0.3453105701609808, 0.3088645344092482 -0.3543132635455286, 0.3089796039028597 -0.3546259452466277, 0.2902257108556563 -0.4016681771271349, 0.2637651880817792 -0.381074875957658, 0.2603180656985482 -0.3627220326680002, 0.2923219707523885 -0.3453105701609808))
11	110780000	114770000	11:110780000-114760000	300	0.317419	-0.38466	-0.493096	0.000859983	1	1.81145	POLYGON ((0.3841074481783452 -0.4022408809356636, 0.3729456753360898 -0.4198521602495282, 0.3691976148608666 -0.4251652670401027, 0.3649430293956168 -0.4300821322622603, 0.3602235393819883 -0.4345546567289614, 0.3550853131859301 -0.4385390880123592, 0.3495786154560934 -0.4419964484515078, 0.3437573154103865 -0.4448929164509568, 0.3376783598608661 -0.4472001573401864, 0.3314012161320919 -0.4488956…
11	110780000	114770000	11:110780000-114760000	301	0.339742	-0.349438	-0.0915954	0.000639987	1	2.71491	POLYGON ((0.3659756946101809 -0.2857335897679869, 0.3818111824772837 -0.2989209240701545, 0.3864635796218068 -0.3031899193023682, 0.3906849593113491 -0.3078855633476244, 0.3944363779811106 -0.312964537402214, 0.3976832276055639 -0.3183799863216682, 0.4003955549684517 -0.3240819508743079, 0.4025483379906949 -0.3300178286309814, 0.4041217165669979 -0.3361328592391354, 0.4051011757816111 -0.34237062…
11	110780000	114770000	11:110780000-114760000	302	0.308071	-0.323063	-0.616211	0.00321994	1	1.68213	POLYGON ((0.2623994235909485 -0.2705308823216691, 0.2836488305455517 -0.262028086975451, 0.2897208396954709 -0.2599362969638706, 0.2959679807123864 -0.2584469650048963, 0.3023306330429494 -0.2575743047676727, 0.3087480737337823 -0.2573266446197024, 0.315159056950345 -0.2577063481437867, 0.3215023984859987 -0.2587097915808085, 0.3277175596829136 -0.2603273984136367, 0.3337452251920834 -0.262543730…
11	110780000	114770000	11:110780000-114760000	303	0.265573	-0.340068	-1.12174	0.000599988	1	1.20966	POLYGON ((0.1978179926929134 -0.3252136185990528, 0.2092046430313196 -0.3062401030531317, 0.2125822235393323 -0.3011618452051186, 0.2164158902799416 -0.2964184548373585, 0.2206726470454217 -0.2920507581104149, 0.2253158561100714 -0.2880963476055521, 0.2303055535695717 -0.2845892587669753, 0.2355987933086231 -0.2815596769602004, 0.2411500166363453 -0.2790336776678872, 0.2623994235909485 -0.2705308…
11	110780000	114770000	11:110780000-114760000	304	0.242799	-0.378015	-3.54719	1.99996e-05	2	-1.05192	POLYGON ((0.1912100762633762 -0.3350695794186453, 0.1925388108173285 -0.334010291580949, 0.1978179926929134 -0.3252136185990528, 0.2603180656985482 -0.3627220326680002, 0.2637651880817792 -0.381074875957658, 0.2312274204368086 -0.4023408984803497, 0.1865310671230364 -0.3462753165202801, 0.1912100762633762 -0.3350695794186453))
11	110780000	114770000	11:110780000-114760000	305	0.204935	-0.408201	-0.929983	0.00151997	1	1.0936	POLYGON ((0.1865310671230364 -0.3462753165202801, 0.2312274204368086 -0.4023408984803497, 0.2312414611321291 -0.4024524924597191, 0.2022084537836774 -0.4313764919030458, 0.1529769635482026 -0.3972928928830446, 0.1633227739535714 -0.3697491742433071, 0.1865310671230364 -0.3462753165202801))
11	110780000	114770000	11:110780000-114760000	306	0.208679	-0.461062	-1.19938	0.000279994	1	1.02634	POLYGON ((0.2736024543103998 -0.4741495859966671, 0.2729635431964186 -0.474680697100224, 0.2729280094698494 -0.4748242156529081, 0.2286529540970672 -0.4916672275424697, 0.1786192342409841 -0.476873628487063, 0.1783854585259468 -0.4755024104706844, 0.2043202474382095 -0.4383241669928678, 0.2736024543103998 -0.4741495859966671))
11	110780000	114770000	11:110780000-114760000	307	0.195247	-0.50649	-1.97021	0.000139997	1	0.50282	POLYGON ((0.1378410477203163 -0.5374139578648367, 0.1383450830311241 -0.5353820229640454, 0.1786192342409841 -0.476873628487063, 0.2286529540970672 -0.4916672275424697, 0.203343199970351 -0.537755239527384, 0.1771735313388547 -0.5457297616941046, 0.1378410477203163 -0.5374139578648367))
11	110780000	114770000	11:110780000-114760000	308	0.234071	-0.52781	-0.867215	0.0576788	1	0.618731	POLYGON ((0.2729280094698494 -0.4748242156529081, 0.2729184042734105 -0.4748630104550368, 0.2760811252058203 -0.4772448760028986, 0.2807124932623141 -0.4814823243087817, 0.2849185807662385 -0.4861421919173167, 0.2886610364069915 -0.4911819899288186, 0.2919057362918677 -0.4965557652196944, 0.2946230950893732 -0.5022145194452605, 0.2967883357897185 -0.5081066558090347, 0.2983817156227995 -0.5141784…
11	110780000	114770000	11:110780000-114760000	309	0.214059	-0.568223	-1.49525	0.119738	1	0.302953	POLYGON ((0.2570823243597085 -0.617916993883509, 0.2521328494308062 -0.6218144172302199, 0.246669048008147 -0.6253040561124994, 0.2399285876754528 -0.6291548849407822, 0.2155353290891799 -0.6128779491512465, 0.1771735313388547 -0.5457297616941046, 0.203343199970351 -0.537755239527384, 0.2820864726109731 -0.5767488250101195, 0.280818707710317 -0.5812691581271912, 0.2570823243597085 -0.617916993883…
11	110780000	114770000	11:110780000-114760000	310	0.177818	-0.588927	-3.54719	0.00259995	2	-0.749283	POLYGON ((0.1126236786907031 -0.5760964255833182, 0.1133305911094245 -0.5761927575701986, 0.1133541412833546 -0.5760368267471085, 0.1148662728575002 -0.5699844338314454, 0.1169452964561285 -0.5641026260498663, 0.1195724899776864 -0.5584443704791641, 0.1227241949202006 -0.553060621055349, 0.1263720294317105 -0.5479998597213465, 0.1301070385811019 -0.5437369257509853, 0.1285000186789113 -0.54415574…
11	110780000	114770000	11:110780000-114760000	311	0.173734	-0.628655	-0.820221	0.0185796	1	0.753981	POLYGON ((0.2399285876754528 -0.6291548849407822, 0.2397587262478258 -0.6292519268711599, 0.239129147955541 -0.635376781831633, 0.23821311249942 -0.6412851841794993, 0.2383415786887053 -0.641256706650608, 0.1953945809483483 -0.6831249229130875, 0.1752461466697804 -0.6790117520804693, 0.1404142600031822 -0.6051561998698368, 0.2155353290891799 -0.6128779491512465, 0.2399285876754528 -0.629154884940…
11	110780000	114770000	11:110780000-114760000	312	0.137352	-0.645813	-0.524552	0.00895982	1	1.18082	POLYGON ((0.1108147053719324 -0.6792157428136734, 0.1226307766111048 -0.5925059409091458, 0.1404142600031822 -0.6051561998698368, 0.1752461466697804 -0.6790117520804693, 0.116384669343659 -0.6915141293737849, 0.1108147053719324 -0.6792157428136734))
11	110780000	114770000	11:110780000-114760000	313	0.0941828	-0.639931	-3.54719	0.00269995	2	-0.856971	POLYGON ((0.02729588317268723 -0.6208912949095065, 0.0402847661692548 -0.6022916124686269, 0.04429852897365063 -0.597114133074392, 0.04880766650272106 -0.5923618427348182, 0.05376740090225283 -0.5880819339257686, 0.05912847967940279 -0.5843169081525672, 0.06483766480309262 -0.5811041538900819, 0.07083826138267033 -0.5784755752976029, 0.07707068067481176 -0.5764572753955511, 0.08347303182773858 -0…
11	110780000	114770000	11:110780000-114760000	314	0.0682051	-0.67713	-1.0367	9.9998e-05	1	1.41214	POLYGON ((0.01198223983458198 -0.6337101230998688, 0.02265751723847275 -0.6275332927967598, 0.02729588317268723 -0.6208912949095065, 0.1108147053719324 -0.6792157428136734, 0.116384669343659 -0.6915141293737849, 0.1082514976515801 -0.706188411174788, 0.08187061467210718 -0.7257282813262296, 0.06309436210744411 -0.7220460587155441, 0.01198223983458198 -0.6337101230998688))
11	110780000	114770000	11:110780000-114760000	315	0.0216066	-0.704092	-1.36097	0.00911982	1	0.782915	POLYGON ((-0.0474746265737004 -0.7072050240888261, -0.04174431045644446 -0.6865321797963368, -0.03974627120182423 -0.6804804580483691, -0.03717163592931391 -0.6746506424259523, -0.03404460111545445 -0.6690975216591456, -0.03039455469931603 -0.6638732840939248, -0.0262557998940274 -0.6590270272250074, -0.02166723280445605 -0.6546042962765625, -0.01667197688079514 -0.6506466561672348, -0.0113169776…
11	110780000	114770000	11:110780000-114760000	316	0.010146	-0.745438	-1.51195	0.000259995	1	0.924038	POLYGON ((-0.04633141429291349 -0.7790102847016035, -0.04632547498441656 -0.7790044628043336, -0.04692482490362758 -0.7780667690050957, -0.04986285047846709 -0.7722829555653902, -0.05221651380934675 -0.7662377292579139, -0.05396289508299743 -0.7599899580848657, -0.05508498815747705 -0.7536004824165549, -0.055571866166823 -0.7471315225320181, -0.05541878792612887 -0.740646072722178, -0.05462724410…
11	110780000	114770000	11:110780000-114760000	317	0.050862	-0.765565	-0.425343	7.99984e-05	1	2.0166	POLYGON ((0.04210417659953152 -0.732035417639198, 0.06309436210744411 -0.7220460587155441, 0.08187061467210718 -0.7257282813262296, 0.08631606126114794 -0.7516656111282982, 0.06031850250869664 -0.78899364314583, 0.02207854269012216 -0.7725458777208185, 0.04210417659953152 -0.732035417639198))
11	110780000	114770000	11:110780000-114760000	318	0.0368072	-0.798242	-0.394458	0.000139997	1	1.70913	POLYGON ((0.03462664303541617 -0.8325957238352808, -0.0009175908493640611 -0.7841569007144696, 0.02207854269012216 -0.7725458777208185, 0.06031850250869664 -0.78899364314583, 0.06364168394006821 -0.8080544055850168, 0.04746948493917724 -0.8328245550653895, 0.03462664303541617 -0.8325957238352808))
11	110780000	114770000	11:110780000-114760000	319	0.00120095	-0.82437	-3.54719	3.99992e-05	2	-1.06459	POLYGON ((-0.06434642052829698 -0.8416748528743531, -0.06453450306896798 -0.8251162041326343, -0.06430941252749849 -0.8188832246901557, -0.06349464789120315 -0.8126996288859609, -0.06209754304706144 -0.8066210767115785, -0.06013067366241197 -0.800702282636267, -0.05761174398843082 -0.7949965231092845, -0.0545634275000274 -0.7895551570061132, -0.05101316280659587 -0.7844271633352136, -0.0469929066…
11	110780000	114770000	11:110780000-114760000	320	0.00157712	-0.857487	-0.986709	0.00879982	1	1.20305	POLYGON ((0.000858795590954607 -0.9255524386373026, -0.01614364147322225 -0.9207930977061634, -0.02231161573812976 -0.9187325419356773, -0.02824582831887834 -0.9160726701977301, -0.0338882103502471 -0.9128395105004785, -0.03918354865656267 -0.9090647007254683, -0.04408002603676854 -0.9047851790371277, -0.04852972831839802 -0.9000428224266749, -0.05248911321870524 -0.894884036927445, -0.0559194364…
11	110780000	114770000	11:110780000-114760000	321	0.035582	-0.867006	-0.441536	0.0444191	1	0.984477	POLYGON ((0.05225579889915638 -0.9334193355838277, 0.03310942215312911 -0.9326987019785334, 0.02541503641277215 -0.9319542752086664, 0.01786123265513144 -0.9303117795684419, 0.000858795590954607 -0.9255524386373026, 0.02462077334081262 -0.8406643129371713, 0.03462664303541617 -0.8325957238352808, 0.04746948493917724 -0.8328245550653895, 0.0556573832998314 -0.8430432887408037, 0.05225579889915638 …
11	110780000	114770000	11:110780000-114760000	322	0.0738747	-0.868447	-0.960792	0.0234795	1	0.680089	POLYGON ((0.09265998307399104 -0.931371147035006, 0.09055695588051589 -0.9320346124765455, 0.08425121637051863 -0.9333623982172354, 0.07784577394210193 -0.9340664387255579, 0.07140217564518365 -0.934139969189122, 0.05225579889915638 -0.9334193355838277, 0.0556573832998314 -0.8430432887408037, 0.1162615277901061 -0.8575880481424939, 0.1153493732032283 -0.8959686833225068, 0.09265998307399104 -0.93…
11	110780000	114770000	11:110780000-114760000	323	0.0834199	-0.828675	-0.597917	0.000759985	1	1.25479	POLYGON ((0.1162615277901061 -0.8575880481424939, 0.0556573832998314 -0.8430432887408037, 0.04746948493917724 -0.8328245550653895, 0.06364168394006821 -0.8080544055850168, 0.1029363092174074 -0.8102266807351498, 0.12470746148018 -0.8424919779102473, 0.1162615277901061 -0.8575880481424939))
11	110780000	114770000	11:110780000-114760000	324	0.0855723	-0.78974	-0.436139	9.9998e-05	1	1.61164	POLYGON ((0.06364168394006821 -0.8080544055850168, 0.06031850250869664 -0.78899364314583, 0.08631606126114794 -0.7516656111282982, 0.1103278910528804 -0.7770023189023735, 0.1029363092174074 -0.8102266807351498, 0.06364168394006821 -0.8080544055850168))
11	110780000	114770000	11:110780000-114760000	325	0.127348	-0.799034	-0.339107	5.99988e-05	1	1.66028	POLYGON ((0.1527799919291009 -0.8304097043544464, 0.12470746148018 -0.8424919779102473, 0.1029363092174074 -0.8102266807351498, 0.1103278910528804 -0.7770023189023735, 0.1583899078241188 -0.7739006383372421, 0.1735763900902981 -0.7948427835170983, 0.1527799919291009 -0.8304097043544464))
11	110780000	114770000	11:110780000-114760000	326	0.124375	-0.752966	-0.500588	1.99996e-05	1	1.82904	POLYGON ((0.1583899078241188 -0.7739006383372421, 0.1103278910528804 -0.7770023189023735, 0.08631606126114794 -0.7516656111282982, 0.08187061467210718 -0.7257282813262296, 0.1082514976515801 -0.706188411174788, 0.1582205436587493 -0.7588546001637764, 0.1583899078241188 -0.7739006383372421))
11	110780000	114770000	11:110780000-114760000	327	0.154117	-0.724747	-0.151749	0.000559989	1	1.76618	POLYGON ((0.1582205436587493 -0.7588546001637764, 0.1082514976515801 -0.706188411174788, 0.116384669343659 -0.6915141293737849, 0.1752461466697804 -0.6790117520804693, 0.1953945809483483 -0.6831249229130875, 0.1991715715664636 -0.702470094973682, 0.1582205436587493 -0.7588546001637764))
11	110780000	114770000	11:110780000-114760000	328	0.191925	-0.752205	-0.505546	0.000159997	1	1.42908	POLYGON ((0.2194799208013833 -0.7944801817462954, 0.1735763900902981 -0.7948427835170983, 0.1583899078241188 -0.7739006383372421, 0.1582205436587493 -0.7588546001637764, 0.1991715715664636 -0.702470094973682, 0.2030102946117276 -0.7072534559501789, 0.2194799208013833 -0.7944801817462954))
11	110780000	114770000	11:110780000-114760000	329	0.229723	-0.745068	-0.400128	3.99992e-05	1	1.65053	POLYGON ((0.2374179955306608 -0.7993768978061466, 0.2321404990691314 -0.7995830284604377, 0.2194799208013833 -0.7944801817462954, 0.2030102946117276 -0.7072534559501789, 0.280001807557595 -0.7459874792561858, 0.2837666014723342 -0.750778829088334, 0.2775909692311573 -0.764002649224593, 0.2374179955306608 -0.7993768978061466))
11	110780000	114770000	11:110780000-114760000	330	0.249296	-0.706164	-3.54719	0.000139997	2	-0.73262	POLYGON ((0.2383415786887053 -0.641256706650608, 0.2520400672420139 -0.6382201169789278, 0.2573033157262783 -0.6435913493383092, 0.280001807557595 -0.7459874792561858, 0.2030102946117276 -0.7072534559501789, 0.1991715715664636 -0.702470094973682, 0.1953945809483483 -0.6831249229130875, 0.2383415786887053 -0.641256706650608))
11	110780000	114770000	11:110780000-114760000	331	0.291002	-0.696919	-3.54719	0.0162797	2	-0.459599	POLYGON ((0.3127268370931897 -0.7384738687878643, 0.3095124706443659 -0.7418347738419626, 0.2837666014723342 -0.750778829088334, 0.280001807557595 -0.7459874792561858, 0.2573033157262783 -0.6435913493383092, 0.2637387482698232 -0.6467010680784913, 0.3161469337384039 -0.6993381811800023, 0.3190250614265899 -0.7105227969781481, 0.3127268370931897 -0.7384738687878643))
11	110780000	114770000	11:110780000-114760000	332	0.337	-0.685082	-0.772917	0.379532	1	0.102588	POLYGON ((0.3161469337384039 -0.6993381811800023, 0.3353291390679727 -0.6585700766846505, 0.3437641309958498 -0.6556010550661083, 0.3676404289205898 -0.6850777139813691, 0.3190250614265899 -0.7105227969781481, 0.3161469337384039 -0.6993381811800023))
11	110780000	114770000	11:110780000-114760000	333	0.374007	-0.655106	-3.54719	0.401552	2	-0.0524938	POLYGON ((0.4337642992222421 -0.6824693952466226, 0.4337640751154541 -0.6824692291912684, 0.4311510159993492 -0.6876068502328253, 0.4278777775454641 -0.6927847386213352, 0.4263577543963692 -0.6947556693227644, 0.4293633811426401 -0.695079781302008, 0.4253361547335799 -0.6975811733013937, 0.4062665758432001 -0.7017712193810669, 0.3676404289205898 -0.6850777139813691, 0.3437641309958498 -0.65560105…
11	110780000	114770000	11:110780000-114760000	334	0.394651	-0.609359	-3.54719	0.160057	2	-0.241356	POLYGON ((0.4251427394506357 -0.5569160755896038, 0.4380678292653134 -0.5962163542966346, 0.4247604718204742 -0.6504781447489424, 0.3680334426576885 -0.6248791626596502, 0.3701410014352349 -0.6015410039605792, 0.4251427394506357 -0.5569160755896038))
11	110780000	114770000	11:110780000-114760000	335	0.367542	-0.575946	-3.54719	0.288554	3	0.168635	POLYGON ((0.3045749004156985 -0.5495463914220842, 0.3160323462348022 -0.5350983551097634, 0.3203409414585108 -0.530187572454146, 0.3251156747919939 -0.525728682380753, 0.3303093925188635 -0.5217657194404672, 0.3358708031688767 -0.5183378205687972, 0.3417449840558452 -0.5154788385822064, 0.3478739236762549 -0.5132170078586882, 0.3541970946120414 -0.5115746655042136, 0.3606520512797234 -0.510568030…
11	110780000	114770000	11:110780000-114760000	336	0.344627	-0.604842	-3.54719	0.417912	2	-0.0447774	POLYGON ((0.2859186882615077 -0.5712488297685867, 0.2829924847869709 -0.5771579770076732, 0.2924997279613146 -0.5647857270962086, 0.2931174545965948 -0.5639944277344049, 0.3045749004156985 -0.5495463914220842, 0.3701410014352349 -0.6015410039605792, 0.3680334426576885 -0.6248791626596502, 0.3507314577745805 -0.6349924114242449, 0.280818707710317 -0.5812691581271912, 0.2820864726109731 -0.57674882…
11	110780000	114770000	11:110780000-114760000	337	0.320026	-0.636856	-3.54719	0.283754	2	-0.128256	POLYGON ((0.2571642237709375 -0.6178525028653724, 0.2570823243597085 -0.617916993883509, 0.280818707710317 -0.5812691581271912, 0.3507314577745805 -0.6349924114242449, 0.3437641309958498 -0.6556010550661083, 0.3353291390679727 -0.6585700766846505, 0.2637387482698232 -0.6467010680784913, 0.2573033157262783 -0.6435913493383092, 0.2520400672420139 -0.6382201169789278, 0.2532052353950178 -0.637961830…
11	110780000	114770000	11:110780000-114760000	338	0.313837	-0.674183	-0.919067	0.210296	1	0.263598	POLYGON ((0.2637387482698232 -0.6467010680784913, 0.3353291390679727 -0.6585700766846505, 0.3161469337384039 -0.6993381811800023, 0.2637387482698232 -0.6467010680784913))
11	110780000	114770000	11:110780000-114760000	339	0.350174	-0.710252	-1.72251	0.388072	1	0.0371487	POLYGON ((0.3754553783174965 -0.7319048213034998, 0.3127268370931897 -0.7384738687878643, 0.3190250614265899 -0.7105227969781481, 0.3676404289205898 -0.6850777139813691, 0.4062665758432001 -0.7017712193810669, 0.3754553783174965 -0.7319048213034998))
11	110780000	114770000	11:110780000-114760000	340	0.355209	-0.758325	-0.511223	0.134757	1	0.423657	POLYGON ((0.3762200946347639 -0.779484656711939, 0.3571664720693624 -0.792871280399153, 0.3095124706443659 -0.7418347738419626, 0.3127268370931897 -0.7384738687878643, 0.3754553783174965 -0.7319048213034998, 0.3762200946347639 -0.779484656711939))
11	110780000	114770000	11:110780000-114760000	341	0.322836	-0.788553	-1.1195	0.00685986	1	0.662334	POLYGON ((0.3095124706443659 -0.7418347738419626, 0.3571664720693624 -0.792871280399153, 0.3543355641566866 -0.8033515683350468, 0.3248032228611482 -0.8246189419295765, 0.2775909692311573 -0.764002649224593, 0.2837666014723342 -0.750778829088334, 0.3095124706443659 -0.7418347738419626))
11	110780000	114770000	11:110780000-114760000	342	0.290316	-0.813881	-0.426557	0.00773985	1	0.963669	POLYGON ((0.2736540187257443 -0.8460240406063706, 0.2702232836035701 -0.8453035238497877, 0.2374179955306608 -0.7993768978061466, 0.2775909692311573 -0.764002649224593, 0.3248032228611482 -0.8246189419295765, 0.3235390688376765 -0.8281988595015252, 0.2736540187257443 -0.8460240406063706))
11	110780000	114770000	11:110780000-114760000	343	0.306913	-0.860329	-0.606403	0.00127997	1	1.06053	POLYGON ((0.3140032801526559 -0.9032148112242613, 0.2736540187257443 -0.8460240406063706, 0.3235390688376765 -0.8281988595015252, 0.3392815062154513 -0.8643557363217029, 0.3218912639223066 -0.9017486088410026, 0.3140032801526559 -0.9032148112242613))
11	110780000	114770000	11:110780000-114760000	344	0.275978	-0.882154	-1.12681	0.00179996	1	0.799386	POLYGON ((0.2493388046913604 -0.8765880256732379, 0.2702232836035701 -0.8453035238497877, 0.2736540187257443 -0.8460240406063706, 0.3140032801526559 -0.9032148112242613, 0.2898746356139984 -0.920969052199849, 0.2546954595202615 -0.8992366663982694, 0.2493388046913604 -0.8765880256732379))
11	110780000	114770000	11:110780000-114760000	345	0.248945	-0.925914	-1.55028	0.0568789	1	0.284055	POLYGON ((0.2843851829666151 -0.9413719012635876, 0.2565997172226877 -0.9626770319389117, 0.2534311084543092 -0.9628274172794298, 0.2149485357120323 -0.9393062328668316, 0.2259169488753301 -0.9178172419246238, 0.2546954595202615 -0.8992366663982694, 0.2898746356139984 -0.920969052199849, 0.2843851829666151 -0.9413719012635876))
11	110780000	114770000	11:110780000-114760000	346	0.205851	-0.903918	-1.50169	0.0103198	1	0.455935	POLYGON ((0.2259169488753301 -0.9178172419246238, 0.2149485357120323 -0.9393062328668316, 0.2143362063382735 -0.9394144671557694, 0.1929816592466612 -0.9288090815725741, 0.1950199751133745 -0.8713863451919258, 0.2033145999975176 -0.8697387973264056, 0.2259169488753301 -0.9178172419246238))
11	110780000	114770000	11:110780000-114760000	347	0.157679	-0.922157	-3.54719	0.0103998	2	-0.538525	POLYGON ((0.1186574490531997 -0.9749839428779397, 0.115058245284796 -0.9722086113508009, 0.1104098442344171 -0.9678442308241589, 0.1062061153879485 -0.9630500558699187, 0.1024866043397229 -0.9578711865658501, 0.0992863015185714 -0.9523563419116984, 0.09663531302356196 -0.9465574015166069, 0.09455857740792496 -0.940528917553848, 0.09307563107545601 -0.9343276015740327, 0.09266569393934759 -0.93136…
11	110780000	114770000	11:110780000-114760000	348	0.158085	-0.870448	-3.54719	0.000239995	2	-0.715485	POLYGON ((0.1153493732032283 -0.8959686833225068, 0.1162615277901061 -0.8575880481424939, 0.12470746148018 -0.8424919779102473, 0.1527799919291009 -0.8304097043544464, 0.1917659144813785 -0.8708585313836988, 0.1569396113908622 -0.8962950354025209, 0.1153493732032283 -0.8959686833225068))
11	110780000	114770000	11:110780000-114760000	349	0.192596	-0.837185	-3.54719	1.99996e-05	2	-0.86467	POLYGON ((0.1917659144813785 -0.8708585313836988, 0.1527799919291009 -0.8304097043544464, 0.1735763900902981 -0.7948427835170983, 0.2194799208013833 -0.7944801817462954, 0.2321404990691314 -0.7995830284604377, 0.2034747895376181 -0.8696380410404153, 0.2033145999975176 -0.8697387973264056, 0.1950199751133745 -0.8713863451919258, 0.1917659144813785 -0.8708585313836988))
11	110780000	114770000	11:110780000-114760000	350	0.233983	-0.85412	-0.949512	0.000339993	1	1.0135	POLYGON ((0.2702232836035701 -0.8453035238497877, 0.2493388046913604 -0.8765880256732379, 0.2034747895376181 -0.8696380410404153, 0.2321404990691314 -0.7995830284604377, 0.2374179955306608 -0.7993768978061466, 0.2702232836035701 -0.8453035238497877))
11	110780000	114770000	11:110780000-114760000	351	0.228016	-0.893498	-1.80617	0.00359993	1	0.386754	POLYGON ((0.2259169488753301 -0.9178172419246238, 0.2033145999975176 -0.8697387973264056, 0.2034747895376181 -0.8696380410404153, 0.2493388046913604 -0.8765880256732379, 0.2546954595202615 -0.8992366663982694, 0.2259169488753301 -0.9178172419246238))
11	110780000	114770000	11:110780000-114760000	352	0.18191	-0.903068	-1.16834	0.0178796	1	0.601662	POLYGON ((0.1569396113908622 -0.8962950354025209, 0.1917659144813785 -0.8708585313836988, 0.1950199751133745 -0.8713863451919258, 0.1929816592466612 -0.9288090815725741, 0.1823931360417659 -0.9286051274570858, 0.1569396113908622 -0.8962950354025209))
11	110780000	114770000	11:110780000-114760000	353	0.180927	-0.954105	-3.54719	0.0942381	2	-0.336043	POLYGON ((0.1670288391188212 -1.021916081456661, 0.1482253143111045 -1.011133925729933, 0.1428440977876757 -1.007690430859789, 0.1378225402106138 -1.003740860289084, 0.1332080662662414 -0.9993225146247626, 0.1290442560541593 -0.9944771216881183, 0.1253704335072679 -0.9892504424281411, 0.1222212950079586 -0.9836918387451205, 0.1196265817079011 -0.9778538073060797, 0.1186774518007825 -0.97499936691…
11	110780000	114770000	11:110780000-114760000	354	0.218534	-0.975669	-0.813888	0.135597	1	0.45848	POLYGON ((0.1971856134287429 -1.041256607358858, 0.1829355283855591 -1.031037158623016, 0.1670288391188212 -1.021916081456661, 0.2143362063382735 -0.9394144671557694, 0.2149485357120323 -0.9393062328668316, 0.2534311084543092 -0.9628274172794298, 0.1971856134287429 -1.041256607358858))
11	110780000	114770000	11:110780000-114760000	355	0.252461	-1	-3.54719	0.147517	2	-0.319426	POLYGON ((0.2927135103383998 -1.052962488340381, 0.2837637488886404 -1.057808685687188, 0.2777344893321793 -1.060687372547396, 0.2714441803388761 -1.062939221034103, 0.264957794355101 -1.064540971859855, 0.2583423291016205 -1.0654760805799, 0.2516661155557924 -1.065734888479343, 0.2449981121625873 -1.065314722337777, 0.238407192564512 -1.064219922040911, 0.2319614342074553 -1.062461795753994, 0.2…
11	110780000	114770000	11:110780000-114760000	356	0.290117	-0.97961	-1.38951	0.049079	1	0.394163	POLYGON ((0.2843851829666151 -0.9413719012635876, 0.3155469427524503 -0.9714787020768232, 0.2912037481528733 -1.026582358086911, 0.2565997172226877 -0.9626770319389117, 0.2843851829666151 -0.9413719012635876))
11	110780000	114770000	11:110780000-114760000	357	0.326661	-0.995753	-3.54719	0.236835	2	-0.218852	POLYGON ((0.3885680391696147 -1.017693564165453, 0.3868399824405822 -1.0222142776651, 0.3839530973817947 -1.027991660294031, 0.3805132386155747 -1.033457886327793, 0.3765536069708704 -1.038560196845781, 0.3721124200205151 -1.043249345367177, 0.3672325432128565 -1.047480073168134, 0.3619610761430205 -1.05121154610993, 0.3563488979570382 -1.054407748761906, 0.3504501762765022 -1.057037832015207, 0.…
11	110780000	114770000	11:110780000-114760000	358	0.322798	-0.945784	-1.72323	0.0224396	1	0.309309	POLYGON ((0.3155469427524503 -0.9714787020768232, 0.2843851829666151 -0.9413719012635876, 0.2898746356139984 -0.920969052199849, 0.3140032801526559 -0.9032148112242613, 0.3218912639223066 -0.9017486088410026, 0.3294401421690499 -0.9068966591601474, 0.3551546156257889 -0.9684165049720223, 0.3155469427524503 -0.9714787020768232))
11	110780000	114770000	11:110780000-114760000	359	0.361781	-0.92949	-3.54719	0.0569589	2	-0.354085	POLYGON ((0.3294401421690499 -0.9068966591601474, 0.3765991574461269 -0.9084732180576314, 0.393273852235504 -0.9341886819234665, 0.3708282773157205 -0.9767235779173444, 0.3551546156257889 -0.9684165049720223, 0.3294401421690499 -0.9068966591601474))
11	110780000	114770000	11:110780000-114760000	360	0.363217	-0.886514	-0.624722	0.0346593	1	0.600195	POLYGON ((0.3765991574461269 -0.9084732180576314, 0.3294401421690499 -0.9068966591601474, 0.3218912639223066 -0.9017486088410026, 0.3392815062154513 -0.8643557363217029, 0.3966240522303914 -0.8586542597645253, 0.3970324479813662 -0.8620723609737351, 0.3765991574461269 -0.9084732180576314))
11	110780000	114770000	11:110780000-114760000	361	0.358386	-0.837918	-3.54719	0.0202196	2	-0.400073	POLYGON ((0.3966240522303914 -0.8586542597645253, 0.3392815062154513 -0.8643557363217029, 0.3235390688376765 -0.8281988595015252, 0.3248032228611482 -0.8246189419295765, 0.3543355641566866 -0.8033515683350468, 0.4015058672035415 -0.8492101610261367, 0.3966240522303914 -0.8586542597645253))
11	110780000	114770000	11:110780000-114760000	362	0.389002	-0.806425	-3.54719	0.152137	2	-0.202553	POLYGON ((0.4186657662616325 -0.7889228768510763, 0.4203212316768216 -0.8369223630569056, 0.4015058672035415 -0.8492101610261367, 0.3543355641566866 -0.8033515683350468, 0.3571664720693624 -0.792871280399153, 0.3762200946347639 -0.779484656711939, 0.4158435654745504 -0.7856099472914456, 0.4186657662616325 -0.7889228768510763))
11	110780000	114770000	11:110780000-114760000	363	0.396541	-0.757661	-3.54719	0.258895	2	-0.122754	POLYGON ((0.3762200946347639 -0.779484656711939, 0.3754553783174965 -0.7319048213034998, 0.4062665758432001 -0.7017712193810669, 0.4253361547335799 -0.6975811733013937, 0.4158435654745504 -0.7856099472914456, 0.3762200946347639 -0.779484656711939))
11	110780000	114770000	11:110780000-114760000	364	0.440661	-0.762419	-3.54719	0.408712	2	-0.0419927	POLYGON ((0.4590857445559188 -0.6993590844138549, 0.4523567401750307 -0.6948760018055987, 0.4825085628023313 -0.712268046129784, 0.4824283260022527 -0.7497313825346936, 0.4677623565198932 -0.7786126083896197, 0.4186657662616325 -0.7889228768510763, 0.4158435654745504 -0.7856099472914456, 0.4253361547335799 -0.6975811733013937, 0.4293633811426401 -0.695079781302008, 0.4477091740462538 -0.697058101…
11	110780000	114770000	11:110780000-114760000	365	0.449464	-0.80434	-3.54719	0.49353	2	-0.00082451	POLYGON ((0.4677623565198932 -0.7786126083896197, 0.4792791880446577 -0.8193189247955742, 0.4347172985933104 -0.839626650958426, 0.4203212316768216 -0.8369223630569056, 0.4186657662616325 -0.7889228768510763, 0.4677623565198932 -0.7786126083896197))
11	110780000	114770000	11:110780000-114760000	366	0.471023	-0.851647	-3.54719	0.155037	3	0.199927	POLYGON ((0.492201261390307 -0.824811500843628, 0.5020782334792169 -0.8553228604610762, 0.5012657220924266 -0.8572883523715719, 0.4610678790467354 -0.8751828115261526, 0.4347172985933104 -0.839626650958426, 0.4792791880446577 -0.8193189247955742, 0.492201261390307 -0.824811500843628))
11	110780000	114770000	11:110780000-114760000	367	0.435654	-0.877859	-0.720259	0.099878	4	-0.420965	POLYGON ((0.4297512066996815 -0.9051983958337612, 0.3970324479813662 -0.8620723609737351, 0.3966240522303914 -0.8586542597645253, 0.4015058672035415 -0.8492101610261367, 0.4203212316768216 -0.8369223630569056, 0.4347172985933104 -0.839626650958426, 0.4610678790467354 -0.8751828115261526, 0.458028275284855 -0.9017237888602863, 0.4297512066996815 -0.9051983958337612))
11	110780000	114770000	11:110780000-114760000	368	0.401833	-0.903519	-1.11914	0.430011	4	-0.0610888	POLYGON ((0.393273852235504 -0.9341886819234665, 0.3765991574461269 -0.9084732180576314, 0.3970324479813662 -0.8620723609737351, 0.4297512066996815 -0.9051983958337612, 0.4137777420714526 -0.9292182259250099, 0.393273852235504 -0.9341886819234665))
11	110780000	114770000	11:110780000-114760000	369	0.414927	-0.957535	-2.34888	0.306534	1	0.0224501	POLYGON ((0.4733770929926616 -0.9924550979911554, 0.472881433862231 -0.9925209851567545, 0.4614711986599209 -1.003960380798823, 0.4567892628089825 -1.008222552391785, 0.4517190267514479 -1.012014561927773, 0.4463075202047849 -1.015301236066713, 0.4406049383908883 -1.018052088781048, 0.4346641764429436 -1.020241604133359, 0.4285403387688693 -1.021849472953175, 0.4222902279223065 -1.022860781217667…
11	110780000	114770000	11:110780000-114760000	370	0.442097	-0.930295	-3.54719	0.345833	3	0.09308	POLYGON ((0.4137777420714526 -0.9292182259250099, 0.4297512066996815 -0.9051983958337612, 0.458028275284855 -0.9017237888602863, 0.4588482838906863 -0.9024800009672356, 0.4698351825054235 -0.9851327689834599, 0.4137777420714526 -0.9292182259250099))
11	110780000	114770000	11:110780000-114760000	371	0.482284	-0.924953	-3.54719	0.340193	3	0.126591	POLYGON ((0.5468684413567814 -0.937201784591683, 0.5468182590177072 -0.9372207346984234, 0.5457092545533687 -0.9422438389438915, 0.5437199909808094 -0.9483486385397036, 0.5411446773543466 -0.9542302630934723, 0.5380078801752493 -0.9598326064534731, 0.5343395220638496 -0.9651022265946851, 0.5301745963208752 -0.9699888554143981, 0.5255528331184103 -0.9744458782510548, 0.5205183205047652 -0.97843077…
11	110780000	114770000	11:110780000-114760000	372	0.485219	-0.883536	-3.54719	0.416352	3	0.0468189	POLYGON ((0.5012657220924266 -0.8572883523715719, 0.5117603227094302 -0.9062288875594054, 0.4588482838906863 -0.9024800009672356, 0.458028275284855 -0.9017237888602863, 0.4610678790467354 -0.8751828115261526, 0.5012657220924266 -0.8572883523715719))
11	110780000	114770000	11:110780000-114760000	373	0.526664	-0.874648	-3.54719	0.256975	3	0.162934	POLYGON ((0.5908216840113548 -0.8887604415160723, 0.5907885205709149 -0.8887584719464017, 0.5901807069789128 -0.8915984789355023, 0.588173781323806 -0.8978480764212901, 0.5855536321435566 -0.9038663849538204, 0.5823463809897346 -0.9095934050651696, 0.5785840025212806 -0.9149720412844732, 0.5743040057334575 -0.9199486713506639, 0.5695490600122891 -0.9244736807990775, 0.564366569742535 -0.928501957…
11	110780000	114770000	11:110780000-114760000	374	0.525088	-0.834146	-3.54719	0.105118	3	0.260744	POLYGON ((0.5020782334792169 -0.8553228604610762, 0.492201261390307 -0.824811500843628, 0.5246610589233766 -0.8035793188679398, 0.5592339155687888 -0.8308031798254337, 0.562856932981212 -0.8529583219443342, 0.5020782334792169 -0.8553228604610762))
11	110780000	114770000	11:110780000-114760000	375	0.496827	-0.79094	-3.54719	0.148757	3	0.204415	POLYGON ((0.5246610589233766 -0.8035793188679398, 0.492201261390307 -0.824811500843628, 0.4792791880446577 -0.8193189247955742, 0.4677623565198932 -0.7786126083896197, 0.4824283260022527 -0.7497313825346936, 0.525883150054366 -0.7916092578197871, 0.5246610589233766 -0.8035793188679398))
11	110780000	114770000	11:110780000-114760000	376	0.524141	-0.762598	-3.54719	0.401672	3	0.0500276	POLYGON ((0.525883150054366 -0.7916092578197871, 0.4824283260022527 -0.7497313825346936, 0.4825085628023313 -0.712268046129784, 0.4862636926969119 -0.7116232660715199, 0.543690378041217 -0.7340050812368687, 0.556999947491285 -0.7640324782303913, 0.525883150054366 -0.7916092578197871))
11	110780000	114770000	11:110780000-114760000	377	0.554475	-0.796826	-0.738786	0.00693986	4	-0.881386	POLYGON ((0.5592339155687888 -0.8308031798254337, 0.5246610589233766 -0.8035793188679398, 0.525883150054366 -0.7916092578197871, 0.556999947491285 -0.7640324782303913, 0.567333256940493 -0.7682170723036127, 0.5810331410934987 -0.7991106695868773, 0.5592339155687888 -0.8308031798254337))
11	110780000	114770000	11:110780000-114760000	378	0.592666	-0.823095	-0.963661	0.0767985	4	-0.626882	POLYGON ((0.6603332547232629 -0.807010722485246, 0.6580817063125184 -0.8296115894809367, 0.6571203516170748 -0.8360299836314945, 0.655530813751467 -0.8423223087737742, 0.6533285845820664 -0.848427238995145, 0.6505351273534737 -0.8542852747610301, 0.6471776675046268 -0.8598393228059921, 0.6432889273257275 -0.8650352525729713, 0.6389068070420605 -0.8698224237775387, 0.6340740154329045 -0.8741541799…
11	110780000	114770000	11:110780000-114760000	379	0.597169	-0.777893	-3.54719	0.229395	3	0.177003	POLYGON ((0.6624223916676449 -0.7701743413512473, 0.6623931116856386 -0.7702004073853724, 0.6626686064502849 -0.7722806277926246, 0.6629070454010656 -0.7783471785717259, 0.6625848031340074 -0.7844098554895554, 0.6603332547232629 -0.807010722485246, 0.5810331410934987 -0.7991106695868773, 0.567333256940493 -0.7682170723036127, 0.6052371798395985 -0.7496722156871354, 0.6624223916676449 -0.770174341…
11	110780000	114770000	11:110780000-114760000	380	0.578005	-0.738723	-3.54719	0.435571	3	0.0354095	POLYGON ((0.5757355528232029 -0.7098806109435198, 0.5912460746799724 -0.7155616205975881, 0.6052371798395985 -0.7496722156871354, 0.567333256940493 -0.7682170723036127, 0.556999947491285 -0.7640324782303913, 0.543690378041217 -0.7340050812368687, 0.5757355528232029 -0.7098806109435198))
11	110780000	114770000	11:110780000-114760000	381	0.616938	-0.722754	-3.54719	0.212576	2	-0.21306	POLYGON ((0.6623021401528615 -0.6712591580095701, 0.6727226309502017 -0.6879724293064958, 0.6758176240379679 -0.6935159105188854, 0.6783634345386886 -0.6993320961297351, 0.6803363173235106 -0.7053667377663851, 0.6817178710401237 -0.711563549486419, 0.6824952097447353 -0.7178647327644826, 0.6826610830910615 -0.7242115155871743, 0.6822139439553156 -0.7305447006277934, 0.6811579628664473 -0.73680521…
11	110780000	114770000	11:110780000-114760000	382	0.596097	-0.689327	-1.69773	0.434891	4	-0.0354887	POLYGON ((0.6307074218139066 -0.6334787701642531, 0.6307081849407279 -0.6334808376443528, 0.6350989952617989 -0.6364071743033448, 0.6399203302239234 -0.6403252041337462, 0.644350284756897 -0.6446808592400081, 0.6483492959003325 -0.6494352402137624, 0.6518816493555213 -0.6545458867126445, 0.6623021401528615 -0.6712591580095701, 0.5912460746799724 -0.7155616205975881, 0.5757355528232029 -0.70988061…
11	110780000	114770000	11:110780000-114760000	383	0.548646	-0.699724	-3.54719	0.48431	2	-0.00823336	POLYGON ((0.5702189704380708 -0.6847041711725285, 0.5757355528232029 -0.7098806109435198, 0.543690378041217 -0.7340050812368687, 0.4862636926969119 -0.7116232660715199, 0.5354172584724102 -0.6676205543468906, 0.536681536059099 -0.6674297511006437, 0.5702189704380708 -0.6847041711725285))
11	110780000	114770000	11:110780000-114760000	384	0.569921	-0.658419	-1.01105	0.148757	1	0.371794	POLYGON ((0.6031498080549027 -0.6007358685749021, 0.6112904785768926 -0.6073274879663272, 0.6160701598719313 -0.6115998751125511, 0.6204109738955478 -0.6163174993898475, 0.6242716403018107 -0.6214354970558215, 0.6276154448606451 -0.6269051968905182, 0.6304105886034327 -0.6326745830508057, 0.6307074218139066 -0.6334787701642531, 0.5702189704380708 -0.6847041711725285, 0.536681536059099 -0.66742975…
11	110780000	114770000	11:110780000-114760000	385	0.538582	-0.633043	-3.54719	0.0217596	2	-0.51564	POLYGON ((0.5059738723053155 -0.6111667984524335, 0.5242916491744224 -0.5908234063495477, 0.5478947600187957 -0.5838286134676084, 0.5823427990266005 -0.5907220093770877, 0.5930005781171005 -0.5978755583775772, 0.536681536059099 -0.6674297511006437, 0.5354172584724102 -0.6676205543468906, 0.5058996112710088 -0.6121609049405057, 0.5059738723053155 -0.6111667984524335))
11	110780000	114770000	11:110780000-114760000	386	0.504967	-0.650934	-0.89776	0.0763585	4	-0.47833	POLYGON ((0.4523567401750307 -0.6948760018055987, 0.4512731012421917 -0.6941540461375005, 0.5058996112710088 -0.6121609049405057, 0.5354172584724102 -0.6676205543468906, 0.4862636926969119 -0.7116232660715199, 0.4825085628023313 -0.712268046129784, 0.4523567401750307 -0.6948760018055987))
11	110780000	114770000	11:110780000-114760000	387	0.470477	-0.627955	-1.06229	0.404532	4	-0.0805672	POLYGON ((0.4512731012421917 -0.6941540461375005, 0.4340281041428559 -0.6826648655396932, 0.4337642992222421 -0.6824693952466226, 0.4247604718204742 -0.6504781447489424, 0.4380678292653134 -0.5962163542966346, 0.5059738723053155 -0.6111667984524335, 0.5058996112710088 -0.6121609049405057, 0.4512731012421917 -0.6941540461375005))
11	110780000	114770000	11:110780000-114760000	388	0.48081	-0.581023	-3.54719	0.185436	2	-0.245126	POLYGON ((0.4257508763860438 -0.5433499410860493, 0.4264083770187988 -0.5441603329201183, 0.4296467562183957 -0.5397436089730419, 0.4336754686899222 -0.5351972364960988, 0.4499060755848588 -0.5185031231653755, 0.5242916491744224 -0.5908234063495477, 0.5059738723053155 -0.6111667984524335, 0.4380678292653134 -0.5962163542966346, 0.4251427394506357 -0.5569160755896038, 0.4257508763860438 -0.5433499…
11	110780000	114770000	11:110780000-114760000	389	0.513271	-0.547635	-0.409941	0.215596	1	0.495546	POLYGON ((0.4499060755848588 -0.5185031231653755, 0.4661366824797953 -0.501809009834652, 0.4711673810908121 -0.4971478321587444, 0.4766563110344061 -0.4930361227921203, 0.4825437345530059 -0.4895186307659881, 0.4887655769576492 -0.4866336380566301, 0.495254123973052 -0.4844125429505678, 0.5177370259232043 -0.4780053204980854, 0.5478947600187957 -0.5838286134676084, 0.5242916491744224 -0.590823406…
11	110780000	114770000	11:110780000-114760000	390	0.558237	-0.534821	-0.497649	0.0608388	1	1.02634	POLYGON ((0.5177370259232043 -0.4780053204980854, 0.5402199278733566 -0.471598098045603, 0.5458489479064945 -0.4702587064739052, 0.5515739385251933 -0.4694194694801934, 0.5573505487977106 -0.4690868885498156, 0.5806978646801811 -0.4687719661375591, 0.5823427990266005 -0.5907220093770877, 0.5478947600187957 -0.5838286134676084, 0.5177370259232043 -0.4780053204980854))
11	110780000	114770000	11:110780000-114760000	391	0.604932	-0.534191	-0.674359	0.0241195	1	1.1023	POLYGON ((0.5806978646801811 -0.4687719661375591, 0.6026285936769425 -0.4684761514874738, 0.6248693401287123 -0.4672163836940391, 0.6323047214556664 -0.5984853617762047, 0.608649526464432 -0.5998252472365241, 0.6058184910392584 -0.5999244726655799, 0.602207878788517 -0.599973174740176, 0.6031498080549027 -0.6007358685749021, 0.5930005781171005 -0.5978755583775772, 0.5823427990266005 -0.5907220093…
11	110780000	114770000	11:110780000-114760000	392	0.652242	-0.531511	-0.98949	0.104738	1	0.662006	POLYGON ((0.6248693401287123 -0.4672163836940391, 0.6485245351199467 -0.4658764982337197, 0.6544608667452237 -0.4658087422002546, 0.6603791047885447 -0.4662768047045476, 0.666230984511758 -0.4672768685776975, 0.6719687823457093 -0.4688007780441815, 0.6921168792215399 -0.4751387025626889, 0.6608837982201106 -0.5744278531213416, 0.635950091075311 -0.5982788795319171, 0.6323047214556664 -0.598485361…
11	110780000	114770000	11:110780000-114760000	393	0.692538	-0.544187	-3.54719	0.153157	2	-0.374672	POLYGON ((0.6921168792215399 -0.4751387025626889, 0.7122649760973703 -0.4814766270811963, 0.7184649837916408 -0.4837755737740754, 0.7244026772107653 -0.4866857366846698, 0.7300179812236981 -0.4901776719859111, 0.7352540825023289 -0.4942160497178271, 0.7400580043352855 -0.4987600112414931, 0.7443811426244312 -0.5037635826298752, 0.7481797576410674 -0.5091761398130467, 0.7514154165664528 -0.5149429…
11	110780000	114770000	11:110780000-114760000	394	0.703375	-0.584965	-0.841734	0.126317	1	0.533995	POLYGON ((0.6671709410665227 -0.6438270357877924, 0.653350033066153 -0.6276170498741465, 0.649747345219158 -0.6229882837167079, 0.6465715839608775 -0.6180568157513309, 0.6438480313234661 -0.6128619050789147, 0.6415983693351854 -0.6074449080508909, 0.6398405074111642 -0.6018489490339564, 0.6388481519407825 -0.5981147265998358, 0.635950091075311 -0.5982788795319171, 0.6608837982201106 -0.5744278531…
11	110780000	114770000	11:110780000-114760000	395	0.731017	-0.617385	-3.54719	0.159037	2	-0.274624	POLYGON ((0.673483162865251 -0.6556440936427428, 0.671632597768828 -0.6490599330977201, 0.6671709410665227 -0.6438270357877924, 0.7564762154765273 -0.5676838492271308, 0.7749357147500977 -0.6038439655937248, 0.7710944520554993 -0.6282091543582081, 0.673483162865251 -0.6556440936427428))
11	110780000	114770000	11:110780000-114760000	396	0.742524	-0.658328	-1.06088	0.414992	1	0.0857752	POLYGON ((0.7430886677274748 -0.7275457631687573, 0.7224503363090413 -0.7209276137523731, 0.7163825398974528 -0.7186461888434669, 0.7105689394452605 -0.7157782448604483, 0.7050660647491754 -0.7123516688746206, 0.6999274241970641 -0.7083997799359406, 0.6952029844676092 -0.7039610050880561, 0.6909386846685419 -0.6990785057146677, 0.6871759896378294 -0.6937997578505132, 0.6839514867513885 -0.6881760…
11	110780000	114770000	11:110780000-114760000	397	0.783801	-0.671564	-3.54719	0.292514	2	-0.316269	POLYGON ((0.8521394946945702 -0.6884527367855201, 0.8377608503343147 -0.7091146837705121, 0.8338306903305335 -0.7142108018233198, 0.8294210771970115 -0.718898219969394, 0.8245742699451563 -0.723132016885501, 0.8193367173850431 -0.7268716184743773, 0.8137586129886804 -0.7300811867018422, 0.807893413866744 -0.732729963046404, 0.8017973284686137 -0.7347925632699515, 0.7955287779152769 -0.73624922068…
11	110780000	114770000	11:110780000-114760000	398	0.812558	-0.63024	-1.43871	0.268495	4	-0.258737	POLYGON ((0.8778413363292173 -0.6021385011590779, 0.8782890140255848 -0.6291508214842045, 0.8780464349498566 -0.6359862789590038, 0.8770949497223319 -0.6427595351448846, 0.8754448581356271 -0.6493972697925831, 0.8731140223705199 -0.6558276296685051, 0.8701276736384987 -0.661981006363339, 0.8665181390548256 -0.6677907898005282, 0.8521394946945702 -0.6884527367855201, 0.7732331605887796 -0.63354183…
11	110780000	114770000	11:110780000-114760000	399	0.811663	-0.576216	-3.54719	0.423552	2	-0.115826	POLYGON ((0.758495254434672 -0.5364179003382525, 0.7587407981039433 -0.5373418783942171, 0.7601614148240806 -0.5353585342098043, 0.7644140959875702 -0.5305072346484655, 0.7691218098387659 -0.5260961310668882, 0.7742392185197826 -0.5221677048039176, 0.7797170385875623 -0.5187597887519623, 0.7855025156403709 -0.5159052030055589, 0.7915399323715264 -0.5136314387859207, 0.7977711451575201 -0.51196039…

## Sheet: ED_Fig_3a_male_13.5
Chr	Start	End	Region	LDBindex	LDBx	LDBy	Signal	LMIpval	LMIq	LMItype	Geometry
11	110780000	114770000	11:110780000-114760000	1	0.476525	0.663904	-3.75062	0.0948981	3	0.319054	POLYGON ((0.5269562151162189 0.7054299138627665, 0.5269497838483908 0.7054103950317999, 0.5285850116693462 0.7034646095592801, 0.532211912321045 0.6981713251434627, 0.5353025158533836 0.6925480309087703, 0.5378270580648498 0.6866488822526883, 0.5397612262338921 0.6805306912015775, 0.5410863932637188 0.6742523792798035, 0.5417897970714225 0.6678744100632474, 0.5418646634938156 0.6614582068820174, …
11	110780000	114770000	11:110780000-114760000	2	0.438925	0.685848	-3.75062	0.00465991	3	0.503421	POLYGON ((0.4354506196477101 0.7173548863385649, 0.4697583416779145 0.6954944897994695, 0.4491016571224153 0.6601008406333093, 0.4007031683570698 0.6875800252927752, 0.3995557881528227 0.7088585441444133, 0.4354506196477101 0.7173548863385649))
11	110780000	114770000	11:110780000-114760000	3	0.465475	0.727516	-3.75062	0.0277194	3	0.503421	POLYGON ((0.4990859060503233 0.7835859718590994, 0.4993356037287021 0.7834513273486082, 0.5047302926459274 0.7798067872223251, 0.5097358054649993 0.7756438336237574, 0.5143025172613309 0.7710037382998479, 0.5183851534073876 0.7659325034063893, 0.5219432384277911 0.7604804054401656, 0.5249414972753698 0.7547014967950461, 0.5273502050498823 0.7486530698836315, 0.5291454816922851 0.7423950891371796,…
11	110780000	114770000	11:110780000-114760000	4	0.424433	0.747076	-3.75062	1.99996e-05	3	0.503421	POLYGON ((0.4561389655819141 0.7607654550899706, 0.4354506196477101 0.7173548863385649, 0.3995557881528227 0.7088585441444133, 0.3892248928822499 0.7185910981822597, 0.3888241347693078 0.719597732165822, 0.3979119038128603 0.774402332166762, 0.4561389655819141 0.7607654550899706))
11	110780000	114770000	11:110780000-114760000	5	0.433809	0.78711	-3.75062	0.0698586	3	0.503421	POLYGON ((0.4636538637763696 0.8483499924767542, 0.4778018184153005 0.8354829724472802, 0.4822631700439385 0.8310133115404718, 0.4862725204610968 0.8261341070757422, 0.4897924688237687 0.8208908742466255, 0.4927901796293402 0.8153325240505366, 0.4952376890184444 0.8095109070271959, 0.4971121656331569 0.8034803295758153, 0.4983961235971404 0.7972970473630316, 0.4990775856309754 0.7910187405472855,…
11	110780000	114770000	11:110780000-114760000	6	0.405513	0.812845	-3.75062	0.0455191	3	0.503421	POLYGON ((0.4175620751358358 0.8798970405076165, 0.4346826662455798 0.8713629367058524, 0.4399279055688032 0.8684402807817611, 0.4448829154636193 0.8650487722456092, 0.4495059091374387 0.8612170125062282, 0.4636538637763696 0.8483499924767542, 0.3974270763588092 0.7755302111972135, 0.3741724510157449 0.7928514607699984, 0.4175620751358358 0.8798970405076165))
11	110780000	114770000	11:110780000-114760000	7	0.371272	0.829913	-3.75062	0.0282194	3	0.503421	POLYGON ((0.3484206190055216 0.8940092153035747, 0.3672329641059776 0.8951734645011343, 0.3740849645573987 0.8952377759305286, 0.3809060687901901 0.8945846425661833, 0.387621362749218 0.8932212375676338, 0.394157094460503 0.8911625347857031, 0.4004414840260918 0.8884311443093805, 0.4175620751358358 0.8798970405076165, 0.3741724510157449 0.7928514607699984, 0.3636160708689447 0.79390708819305, 0.3…
11	110780000	114770000	11:110780000-114760000	8	0.333647	0.827584	-3.75062	1.99996e-05	3	0.503421	POLYGON ((0.3096192041192318 0.8883491865102291, 0.3105429622207005 0.8887518259157813, 0.3167511286216201 0.8907491097885725, 0.3231273761548467 0.892118029189063, 0.3296082739050655 0.892844966106015, 0.3484206190055216 0.8940092153035747, 0.354083426614608 0.8025075924526259, 0.2936206880215075 0.8093111161686338, 0.2899631286302725 0.8414429924008345, 0.3096192041192318 0.8883491865102291))
11	110780000	114770000	11:110780000-114760000	9	0.328585	0.7826	-3.75062	1.99996e-05	3	0.503421	POLYGON ((0.2936206880215075 0.8093111161686338, 0.354083426614608 0.8025075924526259, 0.3636160708689447 0.79390708819305, 0.3301329763393679 0.7474201494935369, 0.296516396521344 0.7397086111977849, 0.2779902360063118 0.7727514706621093, 0.2780236660435705 0.7750296355957118, 0.2936206880215075 0.8093111161686338))
11	110780000	114770000	11:110780000-114760000	10	0.36399	0.757098	-3.75062	1.99996e-05	3	0.503421	POLYGON ((0.3979119038128603 0.774402332166762, 0.3888241347693078 0.719597732165822, 0.3301329763393679 0.7474201494935369, 0.3636160708689447 0.79390708819305, 0.3741724510157449 0.7928514607699984, 0.3974270763588092 0.7755302111972135, 0.3979119038128603 0.774402332166762))
11	110780000	114770000	11:110780000-114760000	11	0.344073	0.715083	-3.75062	1.99996e-05	3	0.503421	POLYGON ((0.3301329763393679 0.7474201494935369, 0.3888241347693078 0.719597732165822, 0.3892248928822499 0.7185910981822597, 0.316297032212412 0.6774277771825462, 0.2930999405190093 0.7138634245118136, 0.2922729327808168 0.7179128839764761, 0.296516396521344 0.7397086111977849, 0.3301329763393679 0.7474201494935369))
11	110780000	114770000	11:110780000-114760000	12	0.362889	0.681748	-3.75062	1.99996e-05	3	0.503421	POLYGON ((0.3892248928822499 0.7185910981822597, 0.3995557881528227 0.7088585441444133, 0.4007031683570698 0.6875800252927752, 0.3923302281183386 0.6686908850084191, 0.3211442787191739 0.6443597098909742, 0.316297032212412 0.6774277771825462, 0.3892248928822499 0.7185910981822597))
11	110780000	114770000	11:110780000-114760000	13	0.377041	0.640344	-3.75062	0.00563989	3	0.409389	POLYGON ((0.3163002674839887 0.6163525031924244, 0.3151692813225762 0.6191969794615094, 0.3148302936954345 0.6201887587716404, 0.3211442787191739 0.6443597098909742, 0.3923302281183386 0.6686908850084191, 0.4066797512293857 0.6267360165860394, 0.4023644025521217 0.6129924242328405, 0.3909510711433871 0.6064124399769715, 0.3162999503886081 0.6163520743764187, 0.3163002674839887 0.6163525031924244))
11	110780000	114770000	11:110780000-114760000	14	0.421777	0.655645	-3.75062	0.00713986	3	0.405092	POLYGON ((0.4007031683570698 0.6875800252927752, 0.4491016571224153 0.6601008406333093, 0.450867612270527 0.6483946362786515, 0.4066797512293857 0.6267360165860394, 0.3923302281183386 0.6686908850084191, 0.4007031683570698 0.6875800252927752))
11	110780000	114770000	11:110780000-114760000	15	0.438778	0.62096	-3.75062	0.00693986	3	0.405092	POLYGON ((0.450867612270527 0.6483946362786515, 0.4703029903335973 0.6313117058282993, 0.4400276089495146 0.5910168616953181, 0.4023644025521217 0.6129924242328405, 0.4066797512293857 0.6267360165860394, 0.450867612270527 0.6483946362786515))
11	110780000	114770000	11:110780000-114760000	16	0.469135	0.598151	-3.75062	0.0309394	3	0.369336	POLYGON ((0.5288246717348067 0.6247344223918613, 0.5288224139112807 0.6247316048209182, 0.5307983429650381 0.6198969761496806, 0.5375323130233398 0.6008018391592379, 0.4481265682886044 0.5692725755365048, 0.4400276089495146 0.5910168616953181, 0.4703029903335973 0.6313117058282993, 0.5288246717348067 0.6247344223918613))
11	110780000	114770000	11:110780000-114760000	17	0.482603	0.559961	-1.00535	0.0182196	4	-0.971522	POLYGON ((0.5375323130233398 0.6008018391592379, 0.5442662830816415 0.5817067021687951, 0.5461432246110679 0.5753842654505306, 0.5473737134712322 0.5689049126490267, 0.5479452308316723 0.562334563840321, 0.5478519621505643 0.5557400648817594, 0.5470948563310993 0.5491885073311096, 0.5456816160674689 0.5427465458659502, 0.5404497994280781 0.5235754087489672, 0.4468793989894297 0.5491108360416816, …
11	110780000	114770000	11:110780000-114760000	18	0.472139	0.521619	-3.75062	0.143877	3	0.282773	POLYGON ((0.5404497994280781 0.5235754087489672, 0.5352179827886874 0.5044042716319842, 0.5332315328700825 0.4983163702980098, 0.5306590834141212 0.4924519837377757, 0.5275253093893022 0.486867363223121, 0.5238602699966595 0.4816160765063525, 0.5196991203415156 0.4767484939976706, 0.5150817742252564 0.4723113056115416, 0.5100525212916315 0.4683470729164343, 0.5046596021999175 0.4648938208837038, …
11	110780000	114770000	11:110780000-114760000	19	0.435724	0.500742	-3.75062	0.103658	3	0.30729	POLYGON ((0.4864522699314043 0.4544554832480248, 0.4682449376628912 0.4440171456123458, 0.4624499002213434 0.4410675279019086, 0.4563905465486726 0.4387080922371452, 0.4563459747062134 0.4386956685445367, 0.4563448339117009 0.4386930911601981, 0.4194880743802298 0.4813798507443477, 0.4276138891907304 0.5203780037894654, 0.4427389140289166 0.530703600837928, 0.4864522699314043 0.4544554832480248))
11	110780000	114770000	11:110780000-114760000	20	0.41228	0.535083	-3.75062	0.0160397	3	0.377337	POLYGON ((0.4446454930213519 0.5554254615387593, 0.4468793989894297 0.5491108360416816, 0.4427389140289166 0.530703600837928, 0.4276138891907304 0.5203780037894654, 0.3897946269615793 0.52030667234048, 0.3914054142025549 0.5567666127142952, 0.4446454930213519 0.5554254615387593))
11	110780000	114770000	11:110780000-114760000	21	0.413346	0.577372	-3.75062	0.0100198	3	0.398068	POLYGON ((0.4481265682886044 0.5692725755365048, 0.4446454930213519 0.5554254615387593, 0.3914054142025549 0.5567666127142952, 0.3910273587432921 0.5571847813102774, 0.3909510711433871 0.6064124399769715, 0.4023644025521217 0.6129924242328405, 0.4400276089495146 0.5910168616953181, 0.4481265682886044 0.5692725755365048))
11	110780000	114770000	11:110780000-114760000	22	0.368647	0.577302	-3.75062	0.0121798	3	0.394923	POLYGON ((0.3041853395415158 0.5878959690668729, 0.3041942356399806 0.5878892594650585, 0.3045003756030377 0.5899722646956034, 0.3060508480205306 0.5961977753838472, 0.3082039723963018 0.6022413673182273, 0.3109390191703175 0.6080448548206513, 0.3142296562286812 0.6135523638580445, 0.3162999503886081 0.6163520743764187, 0.3909510711433871 0.6064124399769715, 0.3910273587432921 0.5571847813102774,…
11	110780000	114770000	11:110780000-114760000	23	0.3687	0.537008	-3.75062	0.0319394	3	0.361694	POLYGON ((0.3914054142025549 0.5567666127142952, 0.3897946269615793 0.52030667234048, 0.3774494225640229 0.5031469977643959, 0.3424228390415228 0.5120857700468711, 0.3162016535176064 0.543582770192456, 0.3161466908140717 0.5570863529458152, 0.3910273587432921 0.5571847813102774, 0.3914054142025549 0.5567666127142952))
11	110780000	114770000	11:110780000-114760000	24	0.412336	0.505615	-3.75062	0.0346993	3	0.356323	POLYGON ((0.3897946269615793 0.52030667234048, 0.4276138891907304 0.5203780037894654, 0.4194880743802298 0.4813798507443477, 0.3807391417918432 0.496238495585245, 0.3774494225640229 0.5031469977643959, 0.3897946269615793 0.52030667234048))
11	110780000	114770000	11:110780000-114760000	25	0.397966	0.46814	-3.2104	0.0466591	3	0.213179	POLYGON ((0.4563448339117009 0.4386930911601981, 0.4563432431785279 0.4386894972344543, 0.4530741127448761 0.4329500557173972, 0.4492426109647722 0.4275697214499926, 0.4448878375848171 0.4226033997196593, 0.4400542322387186 0.4181017708946544, 0.4347911209492863 0.4141107732405587, 0.4291522127657543 0.4106711341290178, 0.4231950516731534 0.4078179544226641, 0.4169804293668939 0.4055803502774924,…
11	110780000	114770000	11:110780000-114760000	26	0.353544	0.477619	-3.75062	0.0947981	3	0.314452	POLYGON ((0.362109229926369 0.4089337258444308, 0.3398981901103558 0.413673326159984, 0.3333123354803607 0.4154422872593548, 0.3131151711440329 0.4220140716892414, 0.3424228390415228 0.5120857700468711, 0.3774494225640229 0.5031469977643959, 0.3807391417918432 0.496238495585245, 0.362109229926369 0.4089337258444308))
11	110780000	114770000	11:110780000-114760000	27	0.313149	0.490763	-3.75062	0.0952781	3	0.314452	POLYGON ((0.3131151711440329 0.4220140716892414, 0.2979435284619302 0.4269506441453417, 0.2826917265369104 0.4293068508949177, 0.2971778377444856 0.5230759137505061, 0.3162016535176064 0.543582770192456, 0.3424228390415228 0.5120857700468711, 0.3131151711440329 0.4220140716892414))
11	110780000	114770000	11:110780000-114760000	28	0.2722	0.497089	-3.75062	0.262715	3	0.158801	POLYGON ((0.2826917265369104 0.4293068508949177, 0.2622170188760629 0.4324699292395783, 0.2557790761388106 0.4337988773388702, 0.2495071093640298 0.4357675424995309, 0.2434645136781632 0.4383560260547999, 0.2377123657946726 0.4415381644027048, 0.2323088066692556 0.4452817934597662, 0.2273084538288054 0.4495490737657403, 0.2227618493141142 0.4542968729533367, 0.2187149488163458 0.4594772017170267,…
11	110780000	114770000	11:110780000-114760000	29	0.263759	0.536581	-1.12533	0.00451991	4	-0.907062	POLYGON ((0.2972970098557257 0.5926684017434599, 0.2972886095188044 0.5926345070786239, 0.300602434905099 0.5905982619365159, 0.3041853395415158 0.5878959690668729, 0.3161466908140717 0.5570863529458152, 0.3162016535176064 0.543582770192456, 0.2971778377444856 0.5230759137505061, 0.2411153339642925 0.5110933286940399, 0.2424581364019114 0.5601477888397558, 0.2568920291224203 0.576824373405885, 0.…
11	110780000	114770000	11:110780000-114760000	30	0.2199	0.537782	-3.75062	0.108718	3	0.252788	POLYGON ((0.2114466882867469 0.4729622595324136, 0.2056000928486756 0.4739791417039649, 0.1995155773582035 0.475654981020289, 0.1962296977561106 0.4769117990671558, 0.1963065892131492 0.4752399263916083, 0.1725324659577648 0.5164400029470546, 0.1720129234267329 0.5218575469461838, 0.1815833110496335 0.5543440069594664, 0.2424581364019114 0.5601477888397558, 0.2411153339642925 0.5110933286940399, …
11	110780000	114770000	11:110780000-114760000	31	0.21608	0.577848	-3.75062	0.0124398	3	0.394923	POLYGON ((0.2424581364019114 0.5601477888397558, 0.1815833110496335 0.5543440069594664, 0.1724690764690905 0.5957724779998603, 0.1876032418034905 0.6154668980082953, 0.2568920291224203 0.576824373405885, 0.2424581364019114 0.5601477888397558))
11	110780000	114770000	11:110780000-114760000	32	0.234574	0.611008	-3.75062	0.0266995	3	0.375196	POLYGON ((0.2998939191313889 0.6098887964992964, 0.2998625141237598 0.6098718560060766, 0.2997317282956415 0.605557463791928, 0.2987853644500753 0.5986737894565174, 0.2972970098557257 0.5926684017434599, 0.2568920291224203 0.576824373405885, 0.1876032418034905 0.6154668980082953, 0.1897932902138926 0.6243736417322068, 0.2618578970020264 0.6337345722215852, 0.2998939191313889 0.6098887964992964))
11	110780000	114770000	11:110780000-114760000	33	0.229673	0.648736	-3.75062	0.0124798	3	0.394923	POLYGON ((0.1825340346160194 0.6646981439577688, 0.2127524917187458 0.6805267697160118, 0.2448313504475257 0.6693928827549367, 0.2618578970020264 0.6337345722215852, 0.1897932902138926 0.6243736417322068, 0.1825340346160194 0.6646981439577688))
11	110780000	114770000	11:110780000-114760000	34	0.270425	0.668195	-3.75062	0.00849983	3	0.402673	POLYGON ((0.3148302936954345 0.6201887587716404, 0.3148209846199951 0.620215994421788, 0.3145482103960025 0.6199407458189454, 0.3095937321080867 0.6158390967666055, 0.3042602344284367 0.6122440748535766, 0.2998939191313889 0.6098887964992964, 0.2618578970020264 0.6337345722215852, 0.2448313504475257 0.6693928827549367, 0.2930999405190093 0.7138634245118136, 0.316297032212412 0.6774277771825462, 0…
11	110780000	114770000	11:110780000-114760000	35	0.24573	0.694999	-3.75062	1.99996e-05	3	0.503421	POLYGON ((0.2922729327808168 0.7179128839764761, 0.2930999405190093 0.7138634245118136, 0.2448313504475257 0.6693928827549367, 0.2127524917187458 0.6805267697160118, 0.2244714898490355 0.7135854925158067, 0.2922729327808168 0.7179128839764761))
11	110780000	114770000	11:110780000-114760000	36	0.243195	0.734724	-3.75062	1.99996e-05	3	0.503421	POLYGON ((0.2779902360063118 0.7727514706621093, 0.296516396521344 0.7397086111977849, 0.2922729327808168 0.7179128839764761, 0.2244714898490355 0.7135854925158067, 0.2081333703680976 0.7481548641811577, 0.2085185438644591 0.7509503263572136, 0.2779902360063118 0.7727514706621093))
11	110780000	114770000	11:110780000-114760000	37	0.196253	0.712538	-3.75062	1.99996e-05	3	0.503421	POLYGON ((0.154413911833608 0.7055592874032504, 0.2081333703680976 0.7481548641811577, 0.2244714898490355 0.7135854925158067, 0.2127524917187458 0.6805267697160118, 0.1825340346160194 0.6646981439577688, 0.1625465813411392 0.6778983948706908, 0.154413911833608 0.7055592874032504))
11	110780000	114770000	11:110780000-114760000	38	0.170746	0.744706	-3.75062	0.000879982	3	0.448184	POLYGON ((0.2037948896159086 0.7577837141553672, 0.2085185438644591 0.7509503263572136, 0.2081333703680976 0.7481548641811577, 0.154413911833608 0.7055592874032504, 0.1296132761558939 0.7300794081382429, 0.1330931498597055 0.7714605100477548, 0.1415285409598424 0.7827849267708537, 0.2037948896159086 0.7577837141553672))
11	110780000	114770000	11:110780000-114760000	39	0.188967	0.790085	-3.75062	0.00435991	3	0.402386	POLYGON ((0.21223715518012 0.812247551076072, 0.2037948896159086 0.7577837141553672, 0.1415285409598424 0.7827849267708537, 0.1432281894090738 0.7988021785648103, 0.1743670249899143 0.8263680830573724, 0.21223715518012 0.812247551076072))
11	110780000	114770000	11:110780000-114760000	40	0.227706	0.78408	-3.75062	1.99996e-05	3	0.503421	POLYGON ((0.2780236660435705 0.7750296355957118, 0.2779902360063118 0.7727514706621093, 0.2085185438644591 0.7509503263572136, 0.2037948896159086 0.7577837141553672, 0.21223715518012 0.812247551076072, 0.2192446781794144 0.8144082523262152, 0.2780236660435705 0.7750296355957118))
11	110780000	114770000	11:110780000-114760000	41	0.250511	0.818121	-3.75062	1.99996e-05	3	0.503421	POLYGON ((0.2899631286302725 0.8414429924008345, 0.2936206880215075 0.8093111161686338, 0.2780236660435705 0.7750296355957118, 0.2192446781794144 0.8144082523262152, 0.2355005110500842 0.8401504466155656, 0.2899631286302725 0.8414429924008345))
11	110780000	114770000	11:110780000-114760000	42	0.249449	0.862867	-3.75062	1.99996e-05	3	0.503421	POLYGON ((0.2276449370114103 0.9256393261615609, 0.2284100913611463 0.9247548984395757, 0.2342172503916444 0.9264538941172447, 0.2405773100652198 0.9276481647445349, 0.2470242733290173 0.9282079022346987, 0.2534949917416066 0.9281276239211427, 0.2599260841782673 0.9274081161353804, 0.2662545576533953 0.9260564265048622, 0.2724184243410583 0.9240857949209867, 0.2783573087499461 0.9215155238534692,…
11	110780000	114770000	11:110780000-114760000	43	0.209158	0.844235	-3.75062	1.99996e-05	3	0.503421	POLYGON ((0.2355005110500842 0.8401504466155656, 0.2192446781794144 0.8144082523262152, 0.21223715518012 0.812247551076072, 0.1743670249899143 0.8263680830573724, 0.1745857165585454 0.8410945394402267, 0.2189960540670728 0.8758412680083265, 0.2355005110500842 0.8401504466155656))
11	110780000	114770000	11:110780000-114760000	44	0.185951	0.873896	-3.75062	0.00687986	3	0.503421	POLYGON ((0.2234968181019767 0.9304340598762154, 0.2276449370114103 0.9256393261615609, 0.2189960540670728 0.8758412680083265, 0.1745857165585454 0.8410945394402267, 0.1562581080141864 0.8704269547175969, 0.1566677687017422 0.8726175344935223, 0.2234968181019767 0.9304340598762154))
11	110780000	114770000	11:110780000-114760000	45	0.162145	0.901413	-3.75062	0.0455191	3	0.503421	POLYGON ((0.135027539930243 0.9608686899326955, 0.13582289599152 0.961265965153542, 0.1417953970924596 0.9635509540970782, 0.147962538929152 0.9652416064678885, 0.1542653343682819 0.9663217516087336, 0.1606434987845444 0.9667810582077823, 0.1670360266676577 0.9666151331149647, 0.1733817751244555 0.9658255633613285, 0.1796200486950117 0.9644199009794933, 0.1856911798891816 0.9624115907703907, 0.19…
11	110780000	114770000	11:110780000-114760000	46	0.140122	0.84526	-3.75062	0.00851983	3	0.355831	POLYGON ((0.1743670249899143 0.8263680830573724, 0.1432281894090738 0.7988021785648103, 0.1065522877582802 0.8339111041576287, 0.1146633282928941 0.859481557222416, 0.1562581080141864 0.8704269547175969, 0.1745857165585454 0.8410945394402267, 0.1743670249899143 0.8263680830573724))
11	110780000	114770000	11:110780000-114760000	47	0.129825	0.884392	-3.75062	0.047679	3	0.347276	POLYGON ((0.1037828070163586 0.88146668312097, 0.1314889569337347 0.9204282697291328, 0.1566677687017422 0.8726175344935223, 0.1562581080141864 0.8704269547175969, 0.1146633282928941 0.859481557222416, 0.1037828070163586 0.88146668312097))
11	110780000	114770000	11:110780000-114760000	48	0.0979961	0.907026	-3.75062	0.139517	3	0.288722	POLYGON ((0.04115616085116913 0.939224549922183, 0.04117482032266642 0.9392269864940459, 0.04253578821620253 0.9416586485286982, 0.04610783003066705 0.9468113236130745, 0.05015696447475827 0.951598186208043, 0.05464596131219873 0.9559752229502793, 0.05953354594091865 0.959902188667794, 0.06477477889717195 0.9633429764188358, 0.0703214690566477 0.9662659494813546, 0.07612261673335216 0.96864423224…
11	110780000	114770000	11:110780000-114760000	49	0.0856621	0.862535	-3.75062	0.0613788	3	0.248352	POLYGON ((0.07361560955355945 0.8898298668953485, 0.1037828070163586 0.88146668312097, 0.1146633282928941 0.859481557222416, 0.1065522877582802 0.8339111041576287, 0.08708693473186933 0.8304886598683872, 0.06156801001439476 0.8513390458980344, 0.07361560955355945 0.8898298668953485))
11	110780000	114770000	11:110780000-114760000	50	0.0481571	0.874274	-3.75062	0.149237	3	0.193694	POLYGON ((0.02548807799135669 0.9355593361889682, 0.03044956981593707 0.9372166009041407, 0.03658123799250687 0.9386271520637308, 0.04115616085116913 0.939224549922183, 0.07361560955355945 0.8898298668953485, 0.06156801001439476 0.8513390458980344, 0.02670136836934112 0.8461622126431984, 0.0212671621803423 0.8496788426800672, 0.01946984236895392 0.8521368398185365, 0.02548807799135669 0.935559336…
11	110780000	114770000	11:110780000-114760000	51	0.0553994	0.825497	-0.553707	0.00907982	4	-0.863308	POLYGON ((0.02670136836934112 0.8461622126431984, 0.06156801001439476 0.8513390458980344, 0.08708693473186933 0.8304886598683872, 0.0725089301163456 0.8069992195396445, 0.03412204261777749 0.8137326904023215, 0.02670136836934112 0.8461622126431984))
11	110780000	114770000	11:110780000-114760000	52	0.0483809	0.768701	-2.00282	0.0304194	4	-0.262697	POLYGON ((0.02147528100310786 0.768439277042819, 0.02578699742494294 0.7835965035624091, 0.0750524822792637 0.780381321292077, 0.07694184271074364 0.7774544350429674, 0.0599512747475464 0.7351809468966333, 0.04624661438882541 0.7288715226966344, 0.02147528100310786 0.768439277042819))
11	110780000	114770000	11:110780000-114760000	53	0.00948643	0.744351	-3.75062	0.149237	3	0.193694	POLYGON ((0.01753507718760761 0.6794677532927275, 0.01750973844010064 0.6795376890508023, 0.01409198116407091 0.6791277247164133, 0.007703165273879721 0.6789896452349646, 0.001331382554915501 0.6794758750204216, -0.004962505848080601 0.6805817697679395, -0.01111838281091047 0.6822967663394979, -0.01707744944865163 0.6846044836594738, -0.02278278674300762 0.6874828791812163, -0.02817989921379905 0…
11	110780000	114770000	11:110780000-114760000	54	-0.00126424	0.782823	-3.75062	0.0859183	3	0.23241	POLYGON ((-0.02414179193551395 0.8037537948531868, -0.01473775810162387 0.8055035953633101, 0.023657872680989 0.7922759185758952, 0.02578699742494294 0.7835965035624091, 0.02147528100310786 0.768439277042819, -0.00718602954916527 0.7604301554655484, -0.02414179193551395 0.8037537948531868))
11	110780000	114770000	11:110780000-114760000	55	-0.0103238	0.831512	-0.624523	0.0276394	4	-0.762355	POLYGON ((-0.02348098876591614 0.8563545338505768, 0.01946984236895392 0.8521368398185365, 0.0212671621803423 0.8496788426800672, -0.01473775810162387 0.8055035953633101, -0.02414179193551395 0.8037537948531868, -0.03124867039802863 0.8057420904344771, -0.02817475612241694 0.8523894614281515, -0.02348098876591614 0.8563545338505768))
11	110780000	114770000	11:110780000-114760000	56	-0.00574282	0.878163	-3.75062	0.189036	3	0.19459	POLYGON ((-0.03335803016472528 0.940763172875519, -0.0133420421010575 0.9431053353013875, -0.006874523441143344 0.9435386389594144, -0.0003958826445132745 0.9433294426290505, 0.006030209550596221 0.9424798022484482, 0.01234059884270713 0.9409980679070735, 0.01847326803447811 0.9388988017827576, 0.02436794652485913 0.9362026350276335, 0.02547692012905066 0.9355556091785951, 0.02548807799135669 0.9…
11	110780000	114770000	11:110780000-114760000	57	-0.0457748	0.873478	-3.75062	0.319394	3	0.12596	POLYGON ((-0.09465669650774011 0.9168331700976953, -0.09461687980606376 0.9168370304378394, -0.09303121896016656 0.9186681957457535, -0.08834565022465254 0.9231071251275086, -0.08324526775549411 0.9270624692465123, -0.0777797700797835 0.9304956869192265, -0.07200241343584231 0.933373324603186, -0.06596949284025544 0.9356673423709417, -0.05973979354481101 0.9373553871333145, -0.05337401822839305 0…
11	110780000	114770000	11:110780000-114760000	58	-0.0486109	0.834035	-3.75062	0.190356	3	0.169869	POLYGON ((-0.07421761300035561 0.8288851103865654, -0.06184925729927246 0.854810790150082, -0.02817475612241694 0.8523894614281515, -0.03124867039802863 0.8057420904344771, -0.03613828016070864 0.8039937096283997, -0.07421761300035561 0.8288851103865654))
11	110780000	114770000	11:110780000-114760000	59	-0.0863264	0.852028	-3.75062	0.249055	3	0.223496	POLYGON ((-0.1389543801991973 0.8053843569331653, -0.1477874949016442 0.8297166529706885, -0.1496838304914316 0.8358693567676309, -0.1509658706394942 0.8421787327859668, -0.151621185058448 0.8485836071558751, -0.1516434200108011 0.8550218800833682, -0.1510323599129402 0.8614311279517846, -0.1497939294253657 0.8677492085629704, -0.1479401360089124 0.8739148636499106, -0.1454889535039099 0.87986831…
11	110780000	114770000	11:110780000-114760000	60	-0.0686601	0.803364	-3.75062	0.127697	3	0.293478	POLYGON ((-0.08616980835498513 0.7352400566552366, -0.1071326288630357 0.750494547143029, -0.1121656702688769 0.7545523437644077, -0.1167733802910005 0.7590873440472531, -0.1209107116957157 0.7640552116039561, -0.1245372159014603 0.7694073781240769, -0.127617438423978 0.7750915182019742, -0.1301212654967503 0.7810520608956422, -0.1389543801991973 0.8053843569331653, -0.07421761300035561 0.8288851…
11	110780000	114770000	11:110780000-114760000	61	-0.0267345	0.772855	-3.75062	0.309674	3	0.109223	POLYGON ((-0.04642849992887921 0.7105631094551584, -0.04643322331561465 0.7105714182960636, -0.04803929028836781 0.7110373614542288, -0.05404842631574948 0.7134474031341975, -0.05978975626153977 0.7164399183218506, -0.06520698784693463 0.7199855661674444, -0.08616980835498513 0.7352400566552366, -0.03613828016070864 0.8039937096283997, -0.03124867039802863 0.8057420904344771, -0.02414179193551395…
11	110780000	114770000	11:110780000-114760000	62	0.00984614	0.815073	-3.75062	0.0859183	3	0.23241	POLYGON ((-0.01473775810162387 0.8055035953633101, 0.0212671621803423 0.8496788426800672, 0.02670136836934112 0.8461622126431984, 0.03412204261777749 0.8137326904023215, 0.023657872680989 0.7922759185758952, -0.01473775810162387 0.8055035953633101))
11	110780000	114770000	11:110780000-114760000	63	0.0501253	0.795429	-3.75062	0.0336193	3	0.275201	POLYGON ((0.02578699742494294 0.7835965035624091, 0.023657872680989 0.7922759185758952, 0.03412204261777749 0.8137326904023215, 0.0725089301163456 0.8069992195396445, 0.0750524822792637 0.780381321292077, 0.02578699742494294 0.7835965035624091))
11	110780000	114770000	11:110780000-114760000	64	0.0966787	0.799878	-3.75062	0.0252995	3	0.286612	POLYGON ((0.1432281894090738 0.7988021785648103, 0.1415285409598424 0.7827849267708537, 0.1330931498597055 0.7714605100477548, 0.07694184271074364 0.7774544350429674, 0.0750524822792637 0.780381321292077, 0.0725089301163456 0.8069992195396445, 0.08708693473186933 0.8304886598683872, 0.1065522877582802 0.8339111041576287, 0.1432281894090738 0.7988021785648103))
11	110780000	114770000	11:110780000-114760000	65	0.0915007	0.75137	-3.75062	0.0185596	3	0.337382	POLYGON ((0.1071047599213284 0.721464454233763, 0.0599512747475464 0.7351809468966333, 0.07694184271074364 0.7774544350429674, 0.1330931498597055 0.7714605100477548, 0.1296132761558939 0.7300794081382429, 0.1071047599213284 0.721464454233763))
11	110780000	114770000	11:110780000-114760000	66	0.0778943	0.704595	-3.75062	0.00847983	3	0.425169	POLYGON ((0.04167185857502225 0.6501783629479287, 0.04137990370697654 0.6503549596536899, 0.03629710525154691 0.6541474343775362, 0.03160561273668457 0.6584144711306615, 0.02734955920873054 0.6631159297380218, 0.02356898152311707 0.6682075834018695, 0.02029944371616445 0.6736415347449014, 0.01757170245285522 0.6793666663826868, 0.01753507718760761 0.6794677532927275, 0.04624661438882541 0.7288715…
11	110780000	114770000	11:110780000-114760000	67	0.115455	0.688783	-3.75062	0.00355993	3	0.436348	POLYGON ((0.08823494767856553 0.6766402859596538, 0.1071047599213284 0.721464454233763, 0.1296132761558939 0.7300794081382429, 0.154413911833608 0.7055592874032504, 0.1625465813411392 0.6778983948706908, 0.137163075343204 0.6648755862637127, 0.08823494767856553 0.6766402859596538))
11	110780000	114770000	11:110780000-114760000	68	0.10696	0.65345	-3.75062	0.0123798	3	0.418055	POLYGON ((0.0562871870163182 0.6121907673573078, 0.05568068999457396 0.6128828450843486, 0.05186626394114557 0.6182371215232071, 0.04860877059532357 0.6239473631470539, 0.04594113944897699 0.6299558460144531, 0.04389033716905417 0.6362018313097808, 0.042477094995755 0.6426221793424343, 0.04171569917365898 0.6491519878161096, 0.04170005981290088 0.6501613046753913, 0.04167185857502225 0.6501783629…
11	110780000	114770000	11:110780000-114760000	69	0.143921	0.633299	-3.75062	1.99996e-05	3	0.503421	POLYGON ((0.1602679003319695 0.5963671243092062, 0.1159093598599041 0.6258929945388364, 0.137163075343204 0.6648755862637127, 0.1625465813411392 0.6778983948706908, 0.1825340346160194 0.6646981439577688, 0.1897932902138926 0.6243736417322068, 0.1876032418034905 0.6154668980082953, 0.1724690764690905 0.5957724779998603, 0.1602679003319695 0.5963671243092062))
11	110780000	114770000	11:110780000-114760000	70	0.119889	0.597193	-3.75062	0.0286994	3	0.503421	POLYGON ((0.06519806139769753 0.5611043614960585, 0.06308479528519587 0.564811416729048, 0.06012276013864307 0.5706734307229299, 0.05776375372694455 0.5768030268779341, 0.05603157803913621 0.5831383585709428, 0.05494371044472636 0.5896155033408942, 0.05451112734989451 0.5961691078559639, 0.05473819344734746 0.602733047317999, 0.05562261767728337 0.6092410926509219, 0.0563212558243889 0.6121518912…
11	110780000	114770000	11:110780000-114760000	71	0.140407	0.5612	-3.75062	0.109218	3	0.252788	POLYGON ((0.1002737356702881 0.5621664914189504, 0.1602679003319695 0.5963671243092062, 0.1724690764690905 0.5957724779998603, 0.1815833110496335 0.5543440069594664, 0.1720129234267329 0.5218575469461838, 0.1002737356702881 0.5621664914189504))
11	110780000	114770000	11:110780000-114760000	72	0.121972	0.528391	-3.75062	0.0229995	3	0.381014	POLYGON ((0.06202397756294468 0.4945381997769891, 0.05783405883628684 0.5156789972439733, 0.0568787194827821 0.5222160666677921, 0.05658791328078917 0.5288161713400725, 0.05696460904583275 0.5354119313594163, 0.05800496112322004 0.5419360111786132, 0.0596983486479989 0.5483218070274561, 0.06202748397245539 0.5545041268649076, 0.06496858915422367 0.5604198559190439, 0.0652761917325016 0.5609673066…
11	110780000	114770000	11:110780000-114760000	73	0.130352	0.486109	-3.75062	0.0677186	3	0.304812	POLYGON ((0.06579834052171861 0.466516351848154, 0.0652606724185575 0.4782070213296397, 0.06202397756294468 0.4945381997769891, 0.1725324659577648 0.5164400029470546, 0.1963065892131492 0.4752399263916083, 0.1967076921291492 0.4665186323601284, 0.0811959376714978 0.4612061063315365, 0.06579834052171861 0.466516351848154))
11	110780000	114770000	11:110780000-114760000	74	0.13243	0.44092	-1.24446	0.0558789	4	-0.642524	POLYGON ((0.1967076921291492 0.4665186323601284, 0.1977468341297509 0.4439242742385656, 0.197719969761911 0.4373801441776013, 0.1970390847169365 0.4308714764564308, 0.1957109995630308 0.4244634697637805, 0.1937490180075363 0.4182203144457561, 0.1911727936309097 0.4122045494976925, 0.188008133012687 0.4064764360979293, 0.184286737221568 0.4010933539589575, 0.1800458842591661 0.3961092265428129, 0.…
11	110780000	114770000	11:110780000-114760000	75	0.104551	0.411296	-3.75062	0.0956981	3	0.284951	POLYGON ((0.0588706504600863 0.4585257158099179, 0.0589715429512532 0.4582708200894354, 0.06584181484069999 0.4655710774471695, 0.06579834052171861 0.466516351848154, 0.0811959376714978 0.4612061063315365, 0.1661061771392249 0.3812970835731402, 0.1521664700192837 0.3664849406034676, 0.1505442801642649 0.3648214618027639, 0.1348048875802396 0.3492450041298148, 0.05427598224463753 0.430616268511703…
11	110780000	114770000	11:110780000-114760000	76	0.0730721	0.380143	-2.19045	0.0338393	4	-0.245257	POLYGON ((0.1348048875802396 0.3492450041298148, 0.1190654949962144 0.3336685464568656, 0.115792862593937 0.3306434708458994, 0.1144907609845342 0.3295196879081065, 0.0665217268853282 0.3483431397710086, 0.0416883936716918 0.4001453980356336, 0.04333260628567237 0.4141609415406771, 0.05427598224463753 0.4306162685117038, 0.1348048875802396 0.3492450041298148))
11	110780000	114770000	11:110780000-114760000	77	0.0271237	0.340487	-3.75062	0.00467991	3	0.438942	POLYGON ((-0.01090821067377184 0.3521833975504128, 0.01104007412008332 0.3617078270476293, 0.0499885326493084 0.3436565142094764, -0.0008293855372545171 0.2860474326419574, -0.01090821067377184 0.3521833975504128))
11	110780000	114770000	11:110780000-114760000	78	0.049697	0.320575	-3.75062	0.0357393	3	0.398643	POLYGON ((0.1144907609845342 0.3295196879081065, 0.1144003139798593 0.3294416273328841, 0.1148810772341918 0.3257050175497835, 0.1150691637826244 0.3192476121798917, 0.1146191151401193 0.3128031636480011, 0.1135353244912818 0.3064345799365076, 0.1118283713422902 0.3002040284674998, 0.1095149182482282 0.2941723292506636, 0.1066175481602662 0.2883983611840572, 0.1031645439804377 0.2829384873031973,…
11	110780000	114770000	11:110780000-114760000	79	0.0376279	0.363152	-3.75062	0.00941981	3	0.427219	POLYGON ((0.0416883936716918 0.4001453980356336, 0.0665217268853282 0.3483431397710086, 0.0499885326493084 0.3436565142094764, 0.01104007412008332 0.3617078270476293, 0.0416883936716918 0.4001453980356336))
11	110780000	114770000	11:110780000-114760000	80	0.00652746	0.38795	-3.75062	0.00277994	3	0.443548	POLYGON ((-0.01417618793870521 0.3550024637378786, -0.02314430892580789 0.4041989186163813, 0.04333260628567237 0.4141609415406771, 0.0416883936716918 0.4001453980356336, 0.01104007412008332 0.3617078270476293, -0.01090821067377184 0.3521833975504128, -0.01417618793870521 0.3550024637378786))
11	110780000	114770000	11:110780000-114760000	81	0.000460888	0.428432	-3.75062	0.00161997	3	0.44754	POLYGON ((0.05304320071634636 0.4732482386044929, 0.0588706504600863 0.4585257158099179, 0.05427598224463753 0.4306162685117038, 0.04333260628567237 0.4141609415406771, -0.02314430892580789 0.4041989186163813, -0.02692511050971537 0.4076560527341865, -0.02655669629620154 0.4417411113329071, 0.05304320071634636 0.4732482386044929))
11	110780000	114770000	11:110780000-114760000	82	-0.015967	0.469936	-3.75062	0.00453991	3	0.503421	POLYGON ((0.0173951515658888 0.5302645501528209, 0.0321779055902217 0.5141776353697727, 0.0360217583875225 0.5095898133448482, 0.03942998777406499 0.5046697231314061, 0.0423740355920096 0.4994585910369995, 0.04482923314311553 0.4940000820606632, 0.05304320071634636 0.4732482386044929, -0.02655669629620154 0.4417411113329071, -0.04488630989248286 0.4587142549432014, -0.04314134546488801 0.47463572…
11	110780000	114770000	11:110780000-114760000	83	-0.0455326	0.50211	-3.75062	0.386792	3	0.0913782	POLYGON ((-0.07873825058386337 0.5584146078567158, -0.07872710434097559 0.5583945673234955, -0.07785763495919776 0.5589459305292075, -0.07225774293863413 0.5617840805901592, -0.06641147081889046 0.5640720903611961, -0.06037271551213715 0.5657888666295582, -0.05419714843730928 0.5669185823967997, -0.04794170228406224 0.5674508227882388, -0.04166404614904476 0.5673806810679171, -0.03542205388321946…
11	110780000	114770000	11:110780000-114760000	84	-0.0706886	0.475933	-3.75062	0.0380992	3	0.2974	POLYGON ((-0.1041406835496257 0.4570593568833369, -0.1052989556361 0.459971237338177, -0.09783489110177936 0.5100896488323589, -0.09010149491713434 0.5197651995267326, -0.04314134546488801 0.4746357265300503, -0.04488630989248286 0.4587142549432014, -0.09045596169812908 0.4423636902159971, -0.1041406835496257 0.4570593568833369))
11	110780000	114770000	11:110780000-114760000	85	-0.0538556	0.429019	-3.75062	0.00243995	3	0.414736	POLYGON ((-0.09045596169812908 0.4423636902159971, -0.04488630989248286 0.4587142549432014, -0.02655669629620154 0.4417411113329071, -0.02692511050971537 0.4076560527341865, -0.06513976697400374 0.4010855339398143, -0.08999904562532669 0.4341650495559081, -0.09045596169812908 0.4423636902159971))
11	110780000	114770000	11:110780000-114760000	86	-0.0451738	0.378525	-3.75062	0.00457991	3	0.375287	POLYGON ((-0.06513976697400374 0.4010855339398143, -0.02692511050971537 0.4076560527341865, -0.02314430892580789 0.4041989186163813, -0.01417618793870521 0.3550024637378786, -0.05076617486607696 0.3539204873326612, -0.06745570285638239 0.3951523213975816, -0.06513976697400374 0.4010855339398143))
11	110780000	114770000	11:110780000-114760000	87	-0.0437297	0.329689	-3.75062	0.00109998	3	0.451032	POLYGON ((-0.00155624902607115 0.2785968584992918, -0.001740004751540234 0.2787589524464458, -0.01176409118266055 0.2678661847343307, -0.07137834217626229 0.3227262919430547, -0.07003891805300337 0.3396407701795354, -0.05076617486607696 0.3539204873326612, -0.01417618793870521 0.3550024637378786, -0.01090821067377184 0.3521833975504128, -0.0008293855372545171 0.2860474326419574, -0.00155624902607…
11	110780000	114770000	11:110780000-114760000	88	-0.076025	0.294596	-3.75062	0.125997	3	0.209349	POLYGON ((-0.01176409118266055 0.2678661847343307, -0.0279117253980308 0.2503192062822931, -0.03247798936593707 0.2458211723252293, -0.0374627161252634 0.2417918330197906, -0.0428180051911953 0.2382699081023898, -0.04849239517879331 0.2352892413360194, -0.05443135831862181 0.232878475290287, -0.06057782443864762 0.2310607761020623, -0.06687272937723059 0.2298536108616328, -0.07325558255725836 0.2…
11	110780000	114770000	11:110780000-114760000	89	-0.11532	0.29293	-3.75062	0.0261595	3	0.370029	POLYGON ((-0.09290314987956411 0.2284356582123968, -0.1125507172018698 0.2276027366612292, -0.1190212737470709 0.227648896449818, -0.1254555828817395 0.2283343880181448, -0.1285421630356055 0.2289766014159428, -0.1285473021177588 0.2289647790972123, -0.1459845589678248 0.261916255256992, -0.1473456480353582 0.2964853908364913, -0.1152501818100658 0.3172446105713944, -0.09632115863076618 0.3090621…
11	110780000	114770000	11:110780000-114760000	90	-0.126426	0.340982	-3.75062	0.0551989	3	0.245219	POLYGON ((-0.1512698787343995 0.3651947807005936, -0.1076843708905177 0.3678063591833426, -0.1050514008804381 0.3663606885699251, -0.1049939084980256 0.3662433893523599, -0.1159436516890795 0.3213092277607746, -0.1502309703965486 0.3486543961879727, -0.1512698787343995 0.3651947807005936))
11	110780000	114770000	11:110780000-114760000	91	-0.129495	0.392201	-3.75062	0.0307394	3	0.269809	POLYGON ((-0.1829471970643115 0.3905862130415821, -0.1511958250195488 0.4116213274950402, -0.1143068244922549 0.4069613935622106, -0.1076843708905177 0.3678063591833426, -0.1512698787343995 0.3651947807005936, -0.1829471970643115 0.3905862130415821))
11	110780000	114770000	11:110780000-114760000	92	-0.141417	0.447799	-3.75062	0.0540389	3	0.245852	POLYGON ((-0.1443607948290922 0.4286666938241644, -0.1599768101631855 0.4634419337889793, -0.1535003635304379 0.4698111514096068, -0.1052989556361 0.459971237338177, -0.1041406835496257 0.4570593568833369, -0.1443607948290922 0.4286666938241644))
11	110780000	114770000	11:110780000-114760000	93	-0.175308	0.48226	-3.75062	0.0546389	3	0.245852	POLYGON ((-0.1535003635304379 0.4698111514096068, -0.1599768101631855 0.4634419337889793, -0.2081774082291974 0.447005518586083, -0.2251715143299669 0.4756897500635375, -0.1882225053953244 0.5074978699340644, -0.1562812022371229 0.5057000990403226, -0.156139420276682 0.5055844041456962, -0.1535003635304379 0.4698111514096068))
11	110780000	114770000	11:110780000-114760000	94	-0.211259	0.524022	-3.75062	0.0210396	3	0.295842	POLYGON ((-0.2440734996249839 0.5212430354659984, -0.2088003016315431 0.5514254983114016, -0.1950086536922091 0.5444654267377131, -0.1882225053953244 0.5074978699340644, -0.2251715143299669 0.4756897500635375, -0.2362173388018496 0.4811100995819244, -0.252467531262303 0.5049996357532027, -0.2440734996249839 0.5212430354659984))
11	110780000	114770000	11:110780000-114760000	95	-0.260789	0.549618	-3.75062	0.0100798	3	0.350468	POLYGON ((-0.3053474823788716 0.5327473135939117, -0.2761232255745302 0.5663395937788308, -0.2518729857796749 0.5741670433275385, -0.2440734996249839 0.5212430354659984, -0.252467531262303 0.5049996357532027, -0.2994987736187677 0.5201746980477292, -0.3002166446463551 0.5207679679801456, -0.3053474823788716 0.5327473135939117))
11	110780000	114770000	11:110780000-114760000	96	-0.294807	0.579212	-3.75062	0.0790584	3	0.273992	POLYGON ((-0.3601311589167441 0.5764394416184991, -0.3600890487254038 0.5764493544224037, -0.3600597319867458 0.576453225712394, -0.3601857669988946 0.5801229503460359, -0.3597936092905258 0.5864198706097383, -0.3587963889107418 0.5926496815209782, -0.3572033904828719 0.5987543804066289, -0.3550294456235445 0.6046771294494522, -0.3522947948528761 0.610362784876766, -0.3490248991450483 0.615758410…
11	110780000	114770000	11:110780000-114760000	97	-0.263561	0.61041	-3.75062	0.0455191	3	0.503421	POLYGON ((-0.3253830610141749 0.6410807829880939, -0.3097602716681994 0.6566797702843504, -0.3048648709755524 0.6610978160940856, -0.2995493656902395 0.665000312766768, -0.2938678200899924 0.6683475678079623, -0.2878780214674185 0.6711055361144331, -0.2816408923724739 0.6732461662486421, -0.2752198709660745 0.6747476857513618, -0.2686802657872968 0.6755948225904793, -0.2620885914968669 0.67577896…
11	110780000	114770000	11:110780000-114760000	98	-0.213447	0.587663	-3.75062	0.0461991	3	0.348875	POLYGON ((-0.195161703419671 0.6511692250301651, -0.1864220893244148 0.6472022635917709, -0.1808340084441325 0.6443345010762213, -0.1755468709477203 0.6409437951225589, -0.1706094646114645 0.6370614339285342, -0.1660985480037033 0.6327530398233754, -0.1634408912241566 0.6311379569823893, -0.2125160501232581 0.5622775088415582, -0.2307463695129419 0.5743536377202219, -0.195161703419671 0.651169225…
11	110780000	114770000	11:110780000-114760000	99	-0.236254	0.553233	-3.75062	0.0158597	3	0.343789	POLYGON ((-0.2440734996249839 0.5212430354659984, -0.2518729857796749 0.5741670433275385, -0.2497925925757143 0.5763389301008343, -0.2307463695129419 0.5743536377202219, -0.2125160501232581 0.5622775088415582, -0.2088003016315431 0.5514254983114016, -0.2440734996249839 0.5212430354659984))
11	110780000	114770000	11:110780000-114760000	100	-0.273459	0.588871	-3.75062	0.00439991	3	0.437721	POLYGON ((-0.2761232255745302 0.5663395937788308, -0.2971448675372162 0.6127995016572669, -0.2525862786195373 0.5923227982803417, -0.2497925925757143 0.5763389301008343, -0.2518729857796749 0.5741670433275385, -0.2761232255745302 0.5663395937788308))
11	110780000	114770000	11:110780000-114760000	101	-0.23178	0.596156	-3.75062	0.0661187	3	0.33342	POLYGON ((-0.2209438346428959 0.6628718836655924, -0.207693810759647 0.6568576211100888, -0.2037323921253976 0.6552201052619363, -0.2018549750320425 0.6542073397676783, -0.195161703419671 0.6511692250301651, -0.2307463695129419 0.5743536377202219, -0.2497925925757143 0.5763389301008343, -0.2525862786195373 0.5923227982803417, -0.2209438346428959 0.6628718836655924))
11	110780000	114770000	11:110780000-114760000	102	-0.188216	0.569682	-3.75062	0.0461991	3	0.348875	POLYGON ((-0.1634408912241566 0.6311379569823893, -0.1542595919130707 0.6255583956600197, -0.1493078630226802 0.6222306857767692, -0.1446800622438947 0.618465485646247, -0.1404147177276814 0.6142941419503836, -0.136547340042732 0.6097513826663177, -0.1331101265368613 0.6048750279431589, -0.130131693282193 0.599705675235276, -0.1276368368357889 0.5942863613134914, -0.127399153579045 0.593701158563…
11	110780000	114770000	11:110780000-114760000	103	-0.172557	0.531127	-3.75062	0.0374993	3	0.2974	POLYGON ((-0.1562812022371229 0.5057000990403226, -0.1882225053953244 0.5074978699340644, -0.1950086536922091 0.5444654267377131, -0.1529942633680068 0.5615297982194242, -0.1562812022371229 0.5057000990403226))
11	110780000	114770000	11:110780000-114760000	104	-0.137134	0.529041	-0.586434	0.0275394	4	-0.880397	POLYGON ((-0.127399153579045 0.5937011585632426, -0.1273914887302966 0.5936822868487213, -0.1270744482733769 0.5936483503293967, -0.1209496609531274 0.5923921618763722, -0.1149728561224947 0.5905567237367645, -0.1091986827257465 0.5881588182482006, -0.1036799369456411 0.5852203706712698, -0.09846707946127246 0.5817682487157962, -0.09360777406060257 0.5778340168758024, -0.08914645182638314 0.57345…
11	110780000	114770000	11:110780000-114760000	105	-0.133756	0.485326	-3.75062	0.0380992	3	0.2974	POLYGON ((-0.1052989556361 0.459971237338177, -0.1535003635304379 0.4698111514096068, -0.156139420276682 0.5055844041456962, -0.09783489110177936 0.5100896488323589, -0.1052989556361 0.459971237338177))
11	110780000	114770000	11:110780000-114760000	106	-0.160616	0.439178	-3.75062	0.0310594	3	0.269809	POLYGON ((-0.1599768101631855 0.4634419337889793, -0.1443607948290922 0.4286666938241644, -0.1511958250195488 0.4116213274950402, -0.1829471970643115 0.3905862130415821, -0.1859992883647631 0.3909566687376814, -0.2071255045631056 0.422611573225718, -0.2081774082291974 0.447005518586083, -0.1599768101631855 0.4634419337889793))
11	110780000	114770000	11:110780000-114760000	107	-0.125347	0.425035	-0.779417	0.0144997	4	-0.716135	POLYGON ((-0.1443607948290922 0.4286666938241644, -0.1041406835496257 0.4570593568833369, -0.09045596169812908 0.4423636902159971, -0.08999904562532669 0.4341650495559081, -0.1143068244922549 0.4069613935622106, -0.1511958250195488 0.4116213274950402, -0.1443607948290922 0.4286666938241644))
11	110780000	114770000	11:110780000-114760000	108	-0.0951098	0.398017	-3.75062	0.00861983	3	0.343731	POLYGON ((-0.08999904562532669 0.4341650495559081, -0.06513976697400374 0.4010855339398143, -0.06745570285638239 0.3951523213975816, -0.1050514008804381 0.3663606885699251, -0.1076843708905177 0.3678063591833426, -0.1143068244922549 0.4069613935622106, -0.08999904562532669 0.4341650495559081))
11	110780000	114770000	11:110780000-114760000	109	-0.0718984	0.367708	-3.75062	0.00101998	3	0.423605	POLYGON ((-0.06745570285638239 0.3951523213975816, -0.05076617486607696 0.3539204873326612, -0.07003891805300337 0.3396407701795354, -0.1049939084980256 0.3662433893523599, -0.1050514008804381 0.3663606885699251, -0.06745570285638239 0.3951523213975816))
11	110780000	114770000	11:110780000-114760000	110	-0.0975864	0.333954	-3.75062	0.00407992	3	0.40952	POLYGON ((-0.07137834217626229 0.3227262919430547, -0.09632115863076618 0.309062167339609, -0.1152501818100658 0.3172446105713944, -0.1159436516890795 0.3213092277607746, -0.1049939084980256 0.3662433893523599, -0.07003891805300337 0.3396407701795354, -0.07137834217626229 0.3227262919430547))
11	110780000	114770000	11:110780000-114760000	111	-0.137455	0.327152	-3.75062	0.0752585	3	0.230874	POLYGON ((-0.1502309703965486 0.3486543961879727, -0.1159436516890795 0.3213092277607746, -0.1152501818100658 0.3172446105713944, -0.1473456480353582 0.2964853908364913, -0.1614008739164132 0.312380410287137, -0.1502309703965486 0.3486543961879727))
11	110780000	114770000	11:110780000-114760000	112	-0.172889	0.338064	-3.75062	0.0560789	3	0.245219	POLYGON ((-0.1859992883647631 0.3909566687376814, -0.1829471970643115 0.3905862130415821, -0.1512698787343995 0.3651947807005936, -0.1502309703965486 0.3486543961879727, -0.1614008739164132 0.312380410287137, -0.2081262428867517 0.3183663327560224, -0.2146734866649976 0.3415474970608606, -0.2110825514979218 0.3557130977004611, -0.1859992883647631 0.3909566687376814))
11	110780000	114770000	11:110780000-114760000	113	-0.178992	0.290423	-3.75062	0.275954	3	0.103361	POLYGON ((-0.1614008739164132 0.312380410287137, -0.1473456480353582 0.2964853908364913, -0.1459845589678248 0.261916255256992, -0.2025794071079088 0.2772742392590968, -0.2109046330534359 0.3110264967445456, -0.2081262428867517 0.3183663327560224, -0.1614008739164132 0.312380410287137))
11	110780000	114770000	11:110780000-114760000	114	-0.188875	0.254006	-3.75062	0.321314	2	-0.084626	POLYGON ((-0.1285473021177588 0.2289647790972123, -0.1302396566134272 0.2250715636053905, -0.1333075742296757 0.2195449475490053, -0.1368948077019961 0.2143403957383452, -0.1409678317100503 0.2095065485164529, -0.1454885808656589 0.205088581720873, -0.1504148054616923 0.2011277844824098, -0.1557004663264843 0.1976611733480037, -0.1612961650935617 0.1947211463340273, -0.1671496058655066 0.19233518…
11	110780000	114770000	11:110780000-114760000	115	-0.229575	0.277946	-3.75062	0.131237	2	-0.192087	POLYGON ((-0.2342842437257517 0.2233728627054556, -0.2355598746286332 0.2235590382998369, -0.2682073169771114 0.2780080714312656, -0.2679866198460955 0.2832223676166225, -0.2109046330534359 0.3110264967445456, -0.2025794071079088 0.2772742392590968, -0.2342842437257517 0.2233728627054556))
11	110780000	114770000	11:110780000-114760000	116	-0.248461	0.316719	-3.75062	0.269455	3	0.0982242	POLYGON ((-0.2146734866649976 0.3415474970608606, -0.2081262428867517 0.3183663327560224, -0.2109046330534359 0.3110264967445456, -0.2679866198460955 0.2832223676166225, -0.2884452553261104 0.3167811552633731, -0.2632085932228996 0.3361777107658475, -0.2146734866649976 0.3415474970608606))
11	110780000	114770000	11:110780000-114760000	117	-0.253072	0.358389	-0.564034	0.0306594	4	-0.669277	POLYGON ((-0.2590248910601863 0.3779288827575861, -0.2110825514979218 0.3557130977004611, -0.2146734866649976 0.3415474970608606, -0.2632085932228996 0.3361777107658475, -0.2675901976457986 0.3734719199632222, -0.2590248910601863 0.3779288827575861))
11	110780000	114770000	11:110780000-114760000	118	-0.27161	0.394017	-3.75062	0.183476	3	0.136052	POLYGON ((-0.250951828386809 0.4095608328976773, -0.2590248910601863 0.3779288827575861, -0.2675901976457986 0.3734719199632222, -0.2942134191062714 0.3780312402884256, -0.3024102950244638 0.3942408056428072, -0.3011523573298644 0.403472079897144, -0.2715464922444012 0.4179411273662746, -0.250951828386809 0.4095608328976773))
11	110780000	114770000	11:110780000-114760000	119	-0.290462	0.43259	-3.75062	0.183376	3	0.134129	POLYGON ((-0.2739172852852867 0.451368904277245, -0.2715464922444012 0.4179411273662746, -0.3011523573298644 0.403472079897144, -0.3119355697062675 0.41829587735104, -0.2959177738526701 0.4541351877719608, -0.2739172852852867 0.451368904277245))
11	110780000	114770000	11:110780000-114760000	120	-0.321123	0.476612	-3.75062	0.0387592	3	0.262675	POLYGON ((-0.3493260975232316 0.4566822932801348, -0.3487062024768427 0.483666639344716, -0.3002166446463551 0.5207679679801456, -0.2994987736187677 0.5201746980477292, -0.3042437711210513 0.4625956175279219, -0.3479423890730493 0.4552461744719659, -0.3493260975232316 0.4566822932801348))
11	110780000	114770000	11:110780000-114760000	121	-0.348303	0.512135	-2.16091	0.0176196	4	-0.232922	POLYGON ((-0.3692093647378294 0.57401208007169, -0.3691941893531168 0.5740080974898178, -0.3664447348515437 0.5749532161185351, -0.3601311589167441 0.5764394416184991, -0.3053474823788716 0.5327473135939117, -0.3002166446463551 0.5207679679801456, -0.3487062024768427 0.483666639344716, -0.367035922939717 0.498802332360497, -0.3692093647378294 0.57401208007169))
11	110780000	114770000	11:110780000-114760000	122	-0.376584	0.477886	-0.215962	0.0103398	4	-0.930252	POLYGON ((-0.3992063357676954 0.4782069828490683, -0.3932850196672162 0.4909436364783852, -0.367035922939717 0.498802332360497, -0.3487062024768427 0.483666639344716, -0.3493260975232316 0.4566822932801348, -0.3823547983194287 0.4524087885892246, -0.3992063357676954 0.4782069828490683))
11	110780000	114770000	11:110780000-114760000	123	-0.407482	0.437805	-3.75062	0.49041	3	0.00538804	POLYGON ((-0.4564358428973599 0.425483193327729, -0.4354208235445173 0.4468455076380712, -0.3855107747285145 0.44817661490302, -0.3943263774756705 0.4098978295018367, -0.4433419965940488 0.4113134537683105, -0.4564358428973599 0.425483193327729))
11	110780000	114770000	11:110780000-114760000	124	-0.444918	0.474633	-2.92884	0.427471	3	0.00503019	POLYGON ((-0.5108444943224925 0.4912868206459197, -0.5093559850128624 0.4908040692452623, -0.5085209980765025 0.5030939272597085, -0.4384184564095024 0.4983310808192721, -0.4224796523365841 0.4745074412246705, -0.4354208235445173 0.4468455076380712, -0.4564358428973599 0.425483193327729, -0.4627794146982246 0.4272923496276432, -0.5108320702063287 0.4912543895684691, -0.5108444943224925 0.49128682…
11	110780000	114770000	11:110780000-114760000	125	-0.441653	0.522691	-3.75062	0.313294	2	-0.112042	POLYGON ((-0.5085209980765025 0.5030939272597085, -0.506888443227446 0.5271228867823177, -0.5061127674464339 0.5336563638684715, -0.5046844266535597 0.5400788118699703, -0.5026178830672263 0.5463252022963149, -0.4999340608288109 0.5523322892729727, -0.4966601341418089 0.5580392499177189, -0.4928292521279278 0.5633883001837257, -0.4884802031860127 0.5683252799338738, -0.4836570222522335 0.57280020…
11	110780000	114770000	11:110780000-114760000	126	-0.386507	0.511031	-3.75062	0.130017	3	0.205605	POLYGON ((-0.4005541720361271 0.5808319766307585, -0.3729812056882168 0.5750019505546022, -0.3692093647378294 0.57401208007169, -0.367035922939717 0.498802332360497, -0.3932850196672162 0.4909436364783852, -0.4124655140225371 0.5244975747842631, -0.4005541720361271 0.5808319766307585))
11	110780000	114770000	11:110780000-114760000	127	-0.414033	0.495296	-3.75062	0.375492	3	0.0616757	POLYGON ((-0.4384184564095024 0.4983310808192721, -0.4124655140225371 0.5244975747842631, -0.3932850196672162 0.4909436364783852, -0.3992063357676954 0.4782069828490683, -0.4224796523365841 0.4745074412246705, -0.4384184564095024 0.4983310808192721))
11	110780000	114770000	11:110780000-114760000	128	-0.408003	0.457363	-1.93634	0.253715	4	-0.102839	POLYGON ((-0.4224796523365841 0.4745074412246705, -0.3992063357676954 0.4782069828490683, -0.3823547983194287 0.4524087885892246, -0.3855107747285145 0.44817661490302, -0.4354208235445173 0.4468455076380712, -0.4224796523365841 0.4745074412246705))
11	110780000	114770000	11:110780000-114760000	129	-0.37029	0.429239	-3.75062	0.103758	3	0.181466	POLYGON ((-0.3943263774756705 0.4098978295018367, -0.3855107747285145 0.44817661490302, -0.3823547983194287 0.4524087885892246, -0.3493260975232316 0.4566822932801348, -0.3479423890730493 0.4552461744719659, -0.3411891007904634 0.4299355717638283, -0.3596252872992081 0.4038646367803402, -0.3915639312081096 0.407591141110989, -0.3943263774756705 0.4098978295018367))
11	110780000	114770000	11:110780000-114760000	130	-0.332147	0.402267	-3.75062	0.273355	3	0.0884823	POLYGON ((-0.3596252872992081 0.4038646367803402, -0.3411891007904634 0.4299355717638283, -0.3119355697062675 0.41829587735104, -0.3011523573298644 0.403472079897144, -0.3024102950244638 0.3942408056428072, -0.3475393922253432 0.378276695703114, -0.3596252872992081 0.4038646367803402))
11	110780000	114770000	11:110780000-114760000	131	-0.31561	0.443829	-3.75062	0.182736	3	0.134129	POLYGON ((-0.3479423890730493 0.4552461744719659, -0.3042437711210513 0.4625956175279219, -0.2959177738526701 0.4541351877719608, -0.3119355697062675 0.41829587735104, -0.3411891007904634 0.4299355717638283, -0.3479423890730493 0.4552461744719659))
11	110780000	114770000	11:110780000-114760000	132	-0.285298	0.473659	-3.75062	0.0255595	3	0.28589	POLYGON ((-0.252467531262303 0.5049996357532027, -0.2362173388018496 0.4811100995819244, -0.2739172852852867 0.451368904277245, -0.2959177738526701 0.4541351877719608, -0.3042437711210513 0.4625956175279219, -0.2994987736187677 0.5201746980477292, -0.252467531262303 0.5049996357532027))
11	110780000	114770000	11:110780000-114760000	133	-0.254888	0.435112	-3.75062	0.0163397	3	0.290124	POLYGON ((-0.2081774082291974 0.447005518586083, -0.2071255045631056 0.422611573225718, -0.250951828386809 0.4095608328976773, -0.2715464922444012 0.4179411273662746, -0.2739172852852867 0.451368904277245, -0.2362173388018496 0.4811100995819244, -0.2251715143299669 0.4756897500635375, -0.2081774082291974 0.447005518586083))
11	110780000	114770000	11:110780000-114760000	134	-0.240269	0.386018	-0.777296	0.00347993	4	-0.781447	POLYGON ((-0.2071255045631056 0.422611573225718, -0.1859992883647631 0.3909566687376814, -0.2110825514979218 0.3557130977004611, -0.2590248910601863 0.3779288827575861, -0.250951828386809 0.4095608328976773, -0.2071255045631056 0.422611573225718))
11	110780000	114770000	11:110780000-114760000	135	-0.278218	0.355435	-3.75062	0.228995	3	0.119626	POLYGON ((-0.2675901976457986 0.3734719199632222, -0.2632085932228996 0.3361777107658475, -0.2884452553261104 0.3167811552633731, -0.3077808926449126 0.3242025310051297, -0.3093662692877061 0.3318428827734639, -0.2942134191062714 0.3780312402884256, -0.2675901976457986 0.3734719199632222))
11	110780000	114770000	11:110780000-114760000	136	-0.320486	0.369302	-3.75062	0.325093	3	0.065251	POLYGON ((-0.3475393922253432 0.378276695703114, -0.3024102950244638 0.3942408056428072, -0.2942134191062714 0.3780312402884256, -0.3093662692877061 0.3318428827734639, -0.3493959843608579 0.3699374436889249, -0.3475393922253432 0.378276695703114))
11	110780000	114770000	11:110780000-114760000	137	-0.34733	0.341094	-3.75062	0.404072	2	-0.0340101	POLYGON ((-0.360569326412326 0.3175500355278496, -0.3705702821744065 0.3550408823560807, -0.3493959843608579 0.3699374436889249, -0.3093662692877061 0.3318428827734639, -0.3077808926449126 0.3242025310051297, -0.3152604698982069 0.3191285935592759, -0.360569326412326 0.3175500355278496))
11	110780000	114770000	11:110780000-114760000	138	-0.375845	0.381627	-1.72739	0.186076	4	-0.155537	POLYGON ((-0.3932883269602133 0.3586263123688154, -0.3915639312081096 0.407591141110989, -0.3596252872992081 0.4038646367803402, -0.3475393922253432 0.378276695703114, -0.3493959843608579 0.3699374436889249, -0.3705702821744065 0.3550408823560807, -0.3932883269602133 0.3586263123688154))
11	110780000	114770000	11:110780000-114760000	139	-0.40907	0.382797	-3.75062	0.220756	2	-0.113955	POLYGON ((-0.4399191319784523 0.3690603824104118, -0.4433419965940488 0.4113134537683105, -0.3943263774756705 0.4098978295018367, -0.3915639312081096 0.407591141110989, -0.3932883269602133 0.3586263123688154, -0.4154681677338701 0.347716958808619, -0.4399191319784523 0.3690603824104118))
11	110780000	114770000	11:110780000-114760000	140	-0.383777	0.331372	-3.75062	0.444491	2	-0.0201392	POLYGON ((-0.384776222500245 0.2922351298860274, -0.4172757730343782 0.3252072798403976, -0.4154681677338701 0.347716958808619, -0.3932883269602133 0.3586263123688154, -0.3705702821744065 0.3550408823560807, -0.360569326412326 0.3175500355278496, -0.384776222500245 0.2922351298860274))
11	110780000	114770000	11:110780000-114760000	141	-0.345723	0.294984	-1.10919	0.308054	1	0.127008	POLYGON ((-0.3631531976991029 0.2626805830078079, -0.3846926445575664 0.2901822776200157, -0.384776222500245 0.2922351298860274, -0.360569326412326 0.3175500355278496, -0.3152604698982069 0.3191285935592759, -0.3368239425304517 0.2580448388747791, -0.339544298428858 0.2570634370277842, -0.3631531976991029 0.2626805830078079))
11	110780000	114770000	11:110780000-114760000	142	-0.306706	0.281211	-3.75062	0.158057	2	-0.162713	POLYGON ((-0.314402610897957 0.2528058748435874, -0.3368239425304517 0.2580448388747791, -0.3152604698982069 0.3191285935592759, -0.3077808926449126 0.3242025310051297, -0.2884452553261104 0.3167811552633731, -0.2679866198460955 0.2832223676166225, -0.2682073169771114 0.2780080714312656, -0.314402610897957 0.2528058748435874))
11	110780000	114770000	11:110780000-114760000	143	-0.286353	0.243903	-1.00261	0.0538189	1	0.539348	POLYGON ((-0.2844054041449589 0.2021303408620045, -0.314402610897957 0.2528058748435874, -0.2682073169771114 0.2780080714312656, -0.2355598746286332 0.2235590382998369, -0.277608492761619 0.2003252882782412, -0.2844054041449589 0.2021303408620045))
11	110780000	114770000	11:110780000-114760000	144	-0.32009	0.223932	-0.216348	0.0894982	1	0.632367	POLYGON ((-0.3428963234179043 0.1885389671146054, -0.339544298428858 0.2570634370277842, -0.3368239425304517 0.2580448388747791, -0.314402610897957 0.2528058748435874, -0.2844054041449589 0.2021303408620045, -0.3428963234179043 0.1885389671146054))
11	110780000	114770000	11:110780000-114760000	145	-0.362139	0.225989	-2.65021	0.0543589	1	0.0485549	POLYGON ((-0.4023651446401597 0.2105792091383463, -0.3631531976991029 0.2626805830078079, -0.339544298428858 0.2570634370277842, -0.3428963234179043 0.1885389671146054, -0.343317882464277 0.188144788877263, -0.3775395367433841 0.1788755523634435, -0.4023651446401597 0.2105792091383463))
11	110780000	114770000	11:110780000-114760000	146	-0.398692	0.253499	-2.35064	0.0860783	1	0.106699	POLYGON ((-0.4302875309723931 0.2363068599847524, -0.4353336247123923 0.2568227189508731, -0.3846926445575664 0.2901822776200157, -0.3631531976991029 0.2626805830078079, -0.4023651446401597 0.2105792091383463, -0.4082771153824559 0.2127150005597441, -0.4302875309723931 0.2363068599847524))
11	110780000	114770000	11:110780000-114760000	147	-0.423923	0.291801	-3.75062	0.135777	2	-0.165367	POLYGON ((-0.3846926445575664 0.2901822776200157, -0.4353336247123923 0.2568227189508731, -0.4520228157639136 0.2696861112366403, -0.4394738386447933 0.3126133153016497, -0.4172757730343782 0.3252072798403976, -0.384776222500245 0.2922351298860274, -0.3846926445575664 0.2901822776200157))
11	110780000	114770000	11:110780000-114760000	148	-0.463786	0.303454	-0.842465	0.349793	1	0.102987	POLYGON ((-0.4520228157639136 0.2696861112366403, -0.4801768614565581 0.2707292191711483, -0.4817650002048174 0.2719463504387452, -0.4936823245927459 0.2900560302937139, -0.4903971870542175 0.3208639242298401, -0.481476408567906 0.3308702289249519, -0.4394738386447933 0.3126133153016497, -0.4520228157639136 0.2696861112366403))
11	110780000	114770000	11:110780000-114760000	149	-0.449362	0.336639	-0.350841	0.418672	1	0.0585781	POLYGON ((-0.4792239429068172 0.3468128217686625, -0.4399191319784523 0.3690603824104118, -0.4154681677338701 0.347716958808619, -0.4172757730343782 0.3252072798403976, -0.4394738386447933 0.3126133153016497, -0.481476408567906 0.3308702289249519, -0.4792239429068172 0.3468128217686625))
11	110780000	114770000	11:110780000-114760000	150	-0.472577	0.377652	-3.75062	0.107958	2	-0.192428	POLYGON ((-0.4854002005439766 0.4071595729253931, -0.4627794146982246 0.4272923496276432, -0.4564358428973599 0.425483193327729, -0.4433419965940488 0.4113134537683105, -0.4399191319784523 0.3690603824104118, -0.4792239429068172 0.3468128217686625, -0.5003200317534169 0.3717029773539139, -0.4854002005439766 0.4071595729253931))
11	110780000	114770000	11:110780000-114760000	151	-0.515463	0.395698	-3.75062	0.104138	2	-0.211014	POLYGON ((-0.536142333085147 0.4112782441376047, -0.4854002005439766 0.4071595729253931, -0.5003200317534169 0.3717029773539139, -0.5164368675768194 0.3701909579319291, -0.536142333085147 0.4112782441376047))
11	110780000	114770000	11:110780000-114760000	152	-0.556296	0.366572	-3.75062	0.132777	2	-0.188083	POLYGON ((-0.5838586672504001 0.3746752154260602, -0.5607593348829758 0.3905270137203322, -0.5314424547119651 0.3603833202818733, -0.5392331332550203 0.343689798557323, -0.5584928868080286 0.3382949820667651, -0.5838586672504001 0.3746752154260602))
11	110780000	114770000	11:110780000-114760000	153	-0.581505	0.403308	-3.75062	0.233195	2	-0.158446	POLYGON ((-0.6458215985702648 0.3815542846360149, -0.6437077296864806 0.3832633343185556, -0.643965539290195 0.3839685921428228, -0.6455892837606544 0.3903257045763223, -0.6465677437326519 0.3968135424812563, -0.6468910667159647 0.4033667773195604, -0.6465559970469754 0.4099194220462662, -0.6455659086712027 0.4164054955584661, -0.6439307711697445 0.4227596870844452, -0.6416670493717272 0.42891801…
11	110780000	114770000	11:110780000-114760000	154	-0.548769	0.434848	-3.75062	0.322554	2	-0.101211	POLYGON ((-0.6105038562783944 0.4661649849366978, -0.5941358127955986 0.4819350011435999, -0.5892997842736478 0.4861567403813097, -0.5840730752936372 0.4898839065024557, -0.5785060671369766 0.4930805726157704, -0.5726524212961315 0.4957159254244656, -0.5665685622208864 0.4977645622416924, -0.5603131334319151 0.4992067358520637, -0.5539464322442896 0.5000285448589675, -0.5475298285497354 0.5002220…
11	110780000	114770000	11:110780000-114760000	155	-0.513221	0.423319	-1.20115	0.419952	1	0.0470056	POLYGON ((-0.4854002005439766 0.4071595729253931, -0.536142333085147 0.4112782441376047, -0.5366640113026724 0.4116045226693487, -0.5108320702063287 0.4912543895684691, -0.4627794146982246 0.4272923496276432, -0.4854002005439766 0.4071595729253931))
11	110780000	114770000	11:110780000-114760000	156	-0.536938	0.385399	-1.6201	0.338693	1	0.0788004	POLYGON ((-0.5607593348829758 0.3905270137203322, -0.5539516172386781 0.4074681836457513, -0.5366640113026724 0.4116045226693487, -0.536142333085147 0.4112782441376047, -0.5164368675768194 0.3701909579319291, -0.5314424547119651 0.3603833202818733, -0.5607593348829758 0.3905270137203322))
11	110780000	114770000	11:110780000-114760000	157	-0.510736	0.34531	-0.293627	0.459411	4	-0.0593539	POLYGON ((-0.5314424547119651 0.3603833202818733, -0.5164368675768194 0.3701909579319291, -0.5003200317534169 0.3717029773539139, -0.4792239429068172 0.3468128217686625, -0.481476408567906 0.3308702289249519, -0.4903971870542175 0.3208639242298401, -0.5262520012544775 0.3302096722796474, -0.5392331332550203 0.343689798557323, -0.5314424547119651 0.3603833202818733))
11	110780000	114770000	11:110780000-114760000	158	-0.520081	0.309457	-3.75062	0.273135	2	-0.084729	POLYGON ((-0.4903971870542175 0.3208639242298401, -0.4936823245927459 0.2900560302937139, -0.5260078174292805 0.2882930431676537, -0.5360053487180702 0.2935822818004697, -0.5262520012544775 0.3302096722796474, -0.4903971870542175 0.3208639242298401))
11	110780000	114770000	11:110780000-114760000	159	-0.540169	0.271486	-3.75062	0.103718	2	-0.18258	POLYGON ((-0.5612086673328189 0.2925709768377875, -0.5360053487180702 0.2935822818004697, -0.5260078174292805 0.2882930431676537, -0.531992483847894 0.2509912672805016, -0.562111344248179 0.2580200371725528, -0.5674617697651819 0.2685753727160609, -0.5612086673328189 0.2925709768377875))
11	110780000	114770000	11:110780000-114760000	160	-0.589862	0.284436	-3.75062	0.0535189	2	-0.266971	POLYGON ((-0.6539883967669677 0.2591965362456078, -0.654561764233711 0.2598823166434968, -0.5883308265216453 0.3152566975574096, -0.5752453464359617 0.3143903403049438, -0.5612086673328189 0.2925709768377875, -0.5674617697651819 0.2685753727160609, -0.6539883967669677 0.2591965362456078))
11	110780000	114770000	11:110780000-114760000	161	-0.618936	0.319209	-3.75062	0.312194	2	-0.10488	POLYGON ((-0.654561764233711 0.2598823166434968, -0.6690983285127573 0.2772688818280307, -0.6730054794237096 0.2824432480990104, -0.6763809469637199 0.2879791412910383, -0.6791915393062812 0.2938221255654599, -0.6814096191856488 0.299914745379296, -0.6830133756610678 0.306197090460136, -0.6839870385892735 0.3126073849190077, -0.6843210336963002 0.3190825947083262, -0.6840120767237408 0.3255590474…
11	110780000	114770000	11:110780000-114760000	162	-0.585786	0.34601	-1.45555	0.446491	1	0.0264402	POLYGON ((-0.6397456639117314 0.3788500652833584, -0.5838586672504001 0.3746752154260602, -0.5584928868080286 0.3382949820667651, -0.5752453464359617 0.3143903403049438, -0.5883308265216453 0.3152566975574096, -0.6397456639117314 0.3788500652833584))
11	110780000	114770000	11:110780000-114760000	163	-0.541926	0.315274	-1.86354	0.124838	1	0.168782	POLYGON ((-0.5584928868080286 0.3382949820667651, -0.5392331332550203 0.343689798557323, -0.5262520012544775 0.3302096722796474, -0.5360053487180702 0.2935822818004697, -0.5612086673328189 0.2925709768377875, -0.5752453464359617 0.3143903403049438, -0.5584928868080286 0.3382949820667651))
11	110780000	114770000	11:110780000-114760000	164	-0.517815	0.2679	-1.07811	0.292774	1	0.132034	POLYGON ((-0.4936823245927459 0.2900560302937139, -0.4817650002048174 0.2719463504387452, -0.5298462870285358 0.2489186042997593, -0.531992483847894 0.2509912672805016, -0.5260078174292805 0.2882930431676537, -0.4936823245927459 0.2900560302937139))
11	110780000	114770000	11:110780000-114760000	165	-0.548396	0.236233	-1.88284	0.235835	1	0.0961339	POLYGON ((-0.550235748449339 0.2158747583064136, -0.5732248819969762 0.2213904831345807, -0.5736190549040651 0.2221647661733053, -0.562111344248179 0.2580200371725528, -0.531992483847894 0.2509912672805016, -0.5298462870285358 0.2489186042997593, -0.5243669464686188 0.226876212200659, -0.550235748449339 0.2158747583064136))
11	110780000	114770000	11:110780000-114760000	166	-0.585944	0.248284	-3.75062	0.190796	2	-0.145141	POLYGON ((-0.6543451059515172 0.2514906544151553, -0.6522856026626184 0.2571598967672005, -0.6539883967669677 0.2591965362456078, -0.5674617697651819 0.2685753727160609, -0.562111344248179 0.2580200371725528, -0.5736190549040651 0.2221647661733053, -0.6543451059515172 0.2514906544151553))
11	110780000	114770000	11:110780000-114760000	167	-0.599834	0.210047	-0.608952	0.269495	1	0.237192	POLYGON ((-0.6643667206879796 0.1997825248350255, -0.6645602373505536 0.2007821041804123, -0.6651565089602115 0.2071676927409661, -0.6651243336032816 0.2135809794056618, -0.6644640208300486 0.2199602637024042, -0.6631819233286067 0.2262441722865543, -0.6612903758073896 0.2323722493970463, -0.6543451059515172 0.2514906544151553, -0.5736190549040651 0.2221647661733053, -0.5732248819969762 0.2213904…
11	110780000	114770000	11:110780000-114760000	168	-0.575794	0.169452	-3.75062	0.204236	2	-0.119819	POLYGON ((-0.5912816542206337 0.1516776036328487, -0.5978354517539186 0.164507712503825, -0.5778734320455243 0.1904124636471804, -0.5400517305047953 0.1656627386773896, -0.5384052263413881 0.1549813882087251, -0.54077004407542 0.1532928449556586, -0.5912816542206337 0.1516776036328487))
11	110780000	114770000	11:110780000-114760000	169	-0.534296	0.203078	-1.65537	0.180916	1	0.153191	POLYGON ((-0.53837677936765 0.170702297510696, -0.550235748449339 0.2158747583064136, -0.5243669464686188 0.226876212200659, -0.5023236211899389 0.2132479076683113, -0.53837677936765 0.170702297510696))
11	110780000	114770000	11:110780000-114760000	170	-0.507515	0.246395	-3.75062	0.0441991	2	-0.241498	POLYGON ((-0.4801768614565581 0.2707292191711483, -0.4934171463709887 0.213302347350686, -0.5023236211899389 0.2132479076683113, -0.5243669464686188 0.226876212200659, -0.5298462870285358 0.2489186042997593, -0.4817650002048174 0.2719463504387452, -0.4801768614565581 0.2707292191711483))
11	110780000	114770000	11:110780000-114760000	171	-0.466253	0.236882	-3.75062	0.153957	2	-0.149496	POLYGON ((-0.4353336247123923 0.2568227189508731, -0.4302875309723931 0.2363068599847524, -0.4846972356519778 0.2070346115714008, -0.4934171463709887 0.213302347350686, -0.4801768614565581 0.2707292191711483, -0.4520228157639136 0.2696861112366403, -0.4353336247123923 0.2568227189508731))
11	110780000	114770000	11:110780000-114760000	172	-0.449627	0.205978	-3.75062	0.204836	2	-0.119885	POLYGON ((-0.4302875309723931 0.2363068599847524, -0.4082771153824559 0.2127150005597441, -0.4539020337191232 0.1791065765692588, -0.475296025227584 0.1862005314949196, -0.4846972356519778 0.2070346115714008, -0.4302875309723931 0.2363068599847524))
11	110780000	114770000	11:110780000-114760000	173	-0.426971	0.175222	-1.38894	0.285614	1	0.125962	POLYGON ((-0.4082771153824559 0.2127150005597441, -0.4023651446401597 0.2105792091383463, -0.3775395367433841 0.1788755523634435, -0.3893010134584717 0.1440881095231381, -0.3990515913388893 0.1337414408345382, -0.4119757457718681 0.1332492948918655, -0.436737179884742 0.1455215902955006, -0.4539020337191232 0.1791065765692588, -0.4082771153824559 0.2127150005597441))
11	110780000	114770000	11:110780000-114760000	174	-0.466529	0.155004	-3.75062	0.0621588	2	-0.21878	POLYGON ((-0.475296025227584 0.1862005314949196, -0.4539020337191232 0.1791065765692588, -0.436737179884742 0.1455215902955006, -0.4850678692747447 0.1289656765517167, -0.5003895445295696 0.1455261932734985, -0.475296025227584 0.1862005314949196))
11	110780000	114770000	11:110780000-114760000	175	-0.50711	0.18004	-3.75062	0.0897382	2	-0.18721	POLYGON ((-0.4846972356519778 0.2070346115714008, -0.475296025227584 0.1862005314949196, -0.5003895445295696 0.1455261932734985, -0.5213449135975431 0.147188274736771, -0.5384052263413881 0.1549813882087251, -0.5400517305047953 0.1656627386773896, -0.53837677936765 0.170702297510696, -0.5023236211899389 0.2132479076683113, -0.4934171463709887 0.213302347350686, -0.4846972356519778 0.2070346115714…
11	110780000	114770000	11:110780000-114760000	176	-0.557834	0.196898	-1.59078	0.211456	1	0.148055	POLYGON ((-0.5778734320455243 0.1904124636471804, -0.5800665514087331 0.1995355632401898, -0.5732248819969762 0.2213904831345807, -0.550235748449339 0.2158747583064136, -0.53837677936765 0.170702297510696, -0.5400517305047953 0.1656627386773896, -0.5778734320455243 0.1904124636471804))
11	110780000	114770000	11:110780000-114760000	177	-0.598671	0.187081	-1.12125	0.206416	1	0.25295	POLYGON ((-0.6668130405044482 0.1940756196646775, -0.6663452743031608 0.1951668495744669, -0.5800665514087331 0.1995355632401898, -0.5778734320455243 0.1904124636471804, -0.5978354517539186 0.164507712503825, -0.6668130405044482 0.1940756196646775))
11	110780000	114770000	11:110780000-114760000	178	-0.614761	0.149548	-3.75062	0.0137597	2	-0.472263	POLYGON ((-0.6539561066573453 0.09723498376339967, -0.6584809804953925 0.1009284268774663, -0.6629241863606913 0.1053258265233289, -0.6669271426724995 0.1101274452891841, -0.6704532594539458 0.1152893928335187, -0.6734703053936121 0.1207644851436813, -0.6759507024635226 0.1265026758326038, -0.6778717780026864 0.1324515135997383, -0.6792159719619618 0.138556621674679, -0.6799709974158746 0.1447621…
11	110780000	114770000	11:110780000-114760000	179	-0.57469	0.134929	-0.770495	0.186936	1	0.284873	POLYGON ((-0.6017154392186603 0.1230781769622046, -0.5912816542206337 0.1516776036328487, -0.54077004407542 0.1532928449556586, -0.5639940821943656 0.1093800224081224, -0.6017154392186603 0.1230781769622046))
11	110780000	114770000	11:110780000-114760000	180	-0.588591	0.0966477	-1.20021	0.0697386	1	0.529208	POLYGON ((-0.6231059103430947 0.0382945169594931, -0.6355691322417756 0.05116832048232189, -0.6399393734073977 0.05616723723163322, -0.643780096874743 0.0615836031498132, -0.6470516957509465 0.06736156276419811, -0.6497204321563379 0.07344153172059724, -0.6517587851413376 0.07976081123813569, -0.6531457344921801 0.08625423468116147, -0.6538669774987598 0.09285483958053986, -0.6538983663895251 0.0…
11	110780000	114770000	11:110780000-114760000	181	-0.563665	0.0709001	-3.75062	0.0637787	2	-0.320251	POLYGON ((-0.5837971163084619 0.008715598151187382, -0.5843100562506459 0.008859328889238689, -0.5901660999561081 0.01112579339673524, -0.5957777290826617 0.0139435456551924, -0.6010931886033811 0.01728659805197266, -0.6060634550093329 0.02112411822754068, -0.6106426884444137 0.02542071343666424, -0.6231059103430947 0.0382945169594931, -0.5657599974560832 0.09381150819101713, -0.5441185430001964 …
11	110780000	114770000	11:110780000-114760000	182	-0.536856	0.11492	-2.04841	0.0711986	1	0.172308	POLYGON ((-0.5639940821943656 0.1093800224081224, -0.54077004407542 0.1532928449556586, -0.5384052263413881 0.1549813882087251, -0.5213449135975431 0.147188274736771, -0.5262335951988082 0.09784195898294612, -0.5285317049150109 0.09485028670519099, -0.5621714018759779 0.104219328606369, -0.5639940821943656 0.1093800224081224))
11	110780000	114770000	11:110780000-114760000	183	-0.506994	0.0919808	-1.53484	0.0454991	1	0.347096	POLYGON ((-0.5220269855147663 0.06947591843995934, -0.5285317049150109 0.09485028670519099, -0.5262335951988082 0.09784195898294612, -0.4826277648888475 0.1094684563097158, -0.4773514660420131 0.09949094414978527, -0.4965739043587032 0.06968558760567856, -0.5101999654802695 0.0643343590945832, -0.5220269855147663 0.06947591843995934))
11	110780000	114770000	11:110780000-114760000	184	-0.471965	0.0693894	-3.75062	0.0595588	2	-0.250713	POLYGON ((-0.4965739043587032 0.06968558760567856, -0.4773514660420131 0.09949094414978527, -0.4526447675713126 0.09090386029130056, -0.4449741992222723 0.07317608364457216, -0.4680558400477682 0.04863772217615858, -0.4965739043587032 0.06968558760567856))
11	110780000	114770000	11:110780000-114760000	185	-0.497218	0.022239	-1.22352	0.0859183	1	0.502674	POLYGON ((-0.5037037294709076 -0.04528468030167236, -0.5205741001449592 -0.03883284969413289, -0.5265448888817496 -0.0362008188998167, -0.5322236087703885 -0.03298678021492476, -0.5375537048995592 -0.02922274255631844, -0.5424820943351125 -0.02494619233293357, -0.5469596947780565 -0.02019972011506972, -0.5477037634132575 -0.01923388092848714, -0.5082107487822988 0.03938500092694661, -0.4755738729…
11	110780000	114770000	11:110780000-114760000	186	-0.463477	0.00933536	-1.04287	0.223436	1	0.271378	POLYGON ((-0.4173236424956689 -0.03821728657901976, -0.4261744156961602 -0.04436541736863596, -0.4315642493997722 -0.04773333463826015, -0.437255600184566 -0.05056206232611766, -0.4431946957108918 -0.05282487438565822, -0.4493254229268694 -0.05450039158667263, -0.455589858229013 -0.05557278350797813, -0.4619288147290919 -0.05603191810451009, -0.4682824014566077 -0.05587345743569811, -0.4745905892…
11	110780000	114770000	11:110780000-114760000	187	-0.4246	0.0363415	-3.75062	0.224836	2	-0.128162	POLYGON ((-0.4268681234982838 0.06209623152794173, -0.3930278508289655 0.04463889551587859, -0.3828140879032883 0.02580605346496423, -0.3872612267803808 0.0078032565745716, -0.4106242210824063 -0.02526432920651424, -0.4438439714160509 0.02255841335397488, -0.4268681234982838 0.06209623152794173))
11	110780000	114770000	11:110780000-114760000	188	-0.423736	0.0902578	-3.75062	0.197256	2	-0.132477	POLYGON ((-0.3990515913388893 0.1337414408345382, -0.3927099243230376 0.1099682571612507, -0.4285011108829347 0.06447743051824104, -0.4449741992222723 0.07317608364457216, -0.4526447675713126 0.09090386029130056, -0.4119757457718681 0.1332492948918655, -0.3990515913388893 0.1337414408345382))
11	110780000	114770000	11:110780000-114760000	189	-0.454457	0.119763	-3.75062	0.145617	2	-0.162769	POLYGON ((-0.436737179884742 0.1455215902955006, -0.4119757457718681 0.1332492948918655, -0.4526447675713126 0.09090386029130056, -0.4773514660420131 0.09949094414978527, -0.4826277648888475 0.1094684563097158, -0.4850678692747447 0.1289656765517167, -0.436737179884742 0.1455215902955006))
11	110780000	114770000	11:110780000-114760000	190	-0.512466	0.112504	-3.75062	0.0395592	2	-0.249472	POLYGON ((-0.4826277648888475 0.1094684563097158, -0.5262335951988082 0.09784195898294612, -0.5213449135975431 0.147188274736771, -0.5003895445295696 0.1455261932734985, -0.4850678692747447 0.1289656765517167, -0.4826277648888475 0.1094684563097158))
11	110780000	114770000	11:110780000-114760000	191	-0.546032	0.0819734	-1.08512	0.107998	1	0.356819	POLYGON ((-0.5441185430001964 0.05935055080283354, -0.5657599974560832 0.09381150819101713, -0.5621714018759779 0.104219328606369, -0.5285317049150109 0.09485028670519099, -0.5220269855147663 0.06947591843995934, -0.5441185430001964 0.05935055080283354))
11	110780000	114770000	11:110780000-114760000	192	-0.52823	0.0431327	-2.6167	0.0130797	1	0.0965344	POLYGON ((-0.5477037634132575 -0.01923388092848714, -0.5477166970228676 -0.0192170924409816, -0.5492510342942761 -0.01878178753267259, -0.5554292322035386 -0.01632730407108502, -0.5613262671070046 -0.01325816774036826, -0.5668811798852103 -0.00960610496766709, -0.5720365480203645 -0.005408868036034811, -0.5767390791872268 -0.0007098448296746496, -0.5809401621491541 0.004442389677432532, -0.583744…
11	110780000	114770000	11:110780000-114760000	193	-0.489038	0.0462575	-1.12874	0.0842783	1	0.398474	POLYGON ((-0.4755738729615483 0.02826980914295325, -0.5082107487822988 0.03938500092694661, -0.5101999654802695 0.0643343590945832, -0.4965739043587032 0.06968558760567856, -0.4680558400477682 0.04863772217615858, -0.468147938755632 0.03341068904246273, -0.4755738729615483 0.02826980914295325))
11	110780000	114770000	11:110780000-114760000	194	-0.447104	0.0460039	-0.425993	0.233015	1	0.285708	POLYGON ((-0.4449741992222723 0.07317608364457216, -0.4285011108829347 0.06447743051824104, -0.4268681234982838 0.06209623152794173, -0.4438439714160509 0.02255841335397488, -0.468147938755632 0.03341068904246273, -0.4680558400477682 0.04863772217615858, -0.4449741992222723 0.07317608364457216))
11	110780000	114770000	11:110780000-114760000	195	-0.404566	0.0751757	-1.55264	0.293034	1	0.118988	POLYGON ((-0.3927099243230376 0.1099682571612507, -0.3813154905791575 0.09327326807477263, -0.3930278508289655 0.04463889551587859, -0.4268681234982838 0.06209623152794173, -0.4285011108829347 0.06447743051824104, -0.3927099243230376 0.1099682571612507))
11	110780000	114770000	11:110780000-114760000	196	-0.368853	0.0665751	-2.11621	0.143057	1	0.124037	POLYGON ((-0.3225470432866893 0.07516810768631345, -0.331332559485227 0.05404748474780226, -0.3828140879032883 0.02580605346496423, -0.3930278508289655 0.04463889551587859, -0.3813154905791575 0.09327326807477263, -0.3225470432866893 0.07516810768631345))
11	110780000	114770000	11:110780000-114760000	197	-0.355989	0.10833	-3.75062	0.0823184	2	-0.228482	POLYGON ((-0.3893010134584717 0.1440881095231381, -0.3096771489781586 0.1112567421823694, -0.3008947918097286 0.09319432903228941, -0.3225470432866893 0.07516810768631345, -0.3813154905791575 0.09327326807477263, -0.3927099243230376 0.1099682571612507, -0.3990515913388893 0.1337414408345382, -0.3893010134584717 0.1440881095231381))
11	110780000	114770000	11:110780000-114760000	198	-0.340467	0.145975	-1.51088	0.0338593	1	0.431084	POLYGON ((-0.3775395367433841 0.1788755523634435, -0.343317882464277 0.188144788877263, -0.3096400400914923 0.1338067941053694, -0.3096771489781586 0.1112567421823694, -0.3893010134584717 0.1440881095231381, -0.3775395367433841 0.1788755523634435))
11	110780000	114770000	11:110780000-114760000	199	-0.306821	0.166828	-0.577888	0.00933981	1	1.02041	POLYGON ((-0.3096400400914923 0.1338067941053694, -0.343317882464277 0.188144788877263, -0.3428963234179043 0.1885389671146054, -0.2844054041449589 0.2021303408620045, -0.277608492761619 0.2003252882782412, -0.2765583594395748 0.1780871267622053, -0.3096400400914923 0.1338067941053694))
11	110780000	114770000	11:110780000-114760000	200	-0.278773	0.145874	-0.0175931	0.0330793	1	0.979124	POLYGON ((-0.2492719469895728 0.1398800735376195, -0.2574773627450708 0.09783117347655303, -0.2742596668974556 0.08900893982327447, -0.3008947918097286 0.09319432903228941, -0.3096771489781586 0.1112567421823694, -0.3096400400914923 0.1338067941053694, -0.2765583594395748 0.1780871267622053, -0.2492719469895728 0.1398800735376195))
11	110780000	114770000	11:110780000-114760000	201	-0.245369	0.16973	0	0.0198996	1	1.1935	POLYGON ((-0.1822780925555265 0.1885105224922597, -0.2492719469895728 0.1398800735376195, -0.2765583594395748 0.1780871267622053, -0.277608492761619 0.2003252882782412, -0.2355598746286332 0.2235590382998369, -0.2342842437257517 0.2233728627054556, -0.1822780925555265 0.1885105224922597))
11	110780000	114770000	11:110780000-114760000	202	-0.219681	0.134343	-3.75062	0.00205996	2	-0.588986	POLYGON ((-0.1772695476818799 0.1872210986383853, -0.1758382949772145 0.1852493887854879, -0.1726214256154302 0.1835784559024278, -0.2135836489372695 0.1047182440228963, -0.2383216786172016 0.09540510589012008, -0.2574773627450708 0.09783117347655303, -0.2492719469895728 0.1398800735376195, -0.1822780925555265 0.1885105224922597, -0.1772695476818799 0.1872210986383853))
11	110780000	114770000	11:110780000-114760000	203	-0.185841	0.116765	-0.990078	0.0049799	1	0.971755	POLYGON ((-0.1726214256154302 0.1835784559024278, -0.1557010794612489 0.1747895497946281, -0.1500051451204831 0.1714555715978172, -0.1487476251669431 0.1705376522118713, -0.1487083230754929 0.1705701879643037, -0.1472153623176126 0.09571010683408991, -0.1524448214499509 0.08432077900420919, -0.2135836489372695 0.1047182440228963, -0.1726214256154302 0.1835784559024278))
11	110780000	114770000	11:110780000-114760000	204	-0.198631	0.0784275	-2.51192	0.00473991	1	0.143972	POLYGON ((-0.2383216786172016 0.09540510589012008, -0.2135836489372695 0.1047182440228963, -0.1524448214499509 0.08432077900420919, -0.1523450850630624 0.07892618471785535, -0.1669644532888157 0.04663676215175908, -0.170208073374197 0.04402302826487658, -0.2016434140349349 0.05010026096209455, -0.2383216786172016 0.09540510589012008))
11	110780000	114770000	11:110780000-114760000	205	-0.229977	0.05305	-2.78723	0.0306594	1	0.00850173	POLYGON ((-0.2574773627450708 0.09783117347655303, -0.2383216786172016 0.09540510589012008, -0.2016434140349349 0.05010026096209455, -0.2475458093716279 0.01899683236703558, -0.2594792343076162 0.03086009942678848, -0.2742596668974556 0.08900893982327447, -0.2574773627450708 0.09783117347655303))
11	110780000	114770000	11:110780000-114760000	206	-0.209406	0.0226915	-3.75062	0.0467391	2	-0.270907	POLYGON ((-0.2475458093716279 0.01899683236703558, -0.2016434140349349 0.05010026096209455, -0.170208073374197 0.04402302826487658, -0.1773199144378632 0.009502897858182528, -0.1944388218429342 -0.00701599228197813, -0.2462359337917351 0.01459745519750892, -0.2475458093716279 0.01899683236703558))
11	110780000	114770000	11:110780000-114760000	207	-0.226083	-0.0172739	-0.717117	0.427571	1	0.0518026	POLYGON ((-0.1959665472788131 -0.02314309560615933, -0.2234612699826363 -0.04559164089772137, -0.2418439629028663 -0.04043028097885751, -0.2540532760622092 -0.008815390532998613, -0.2462359337917351 0.01459745519750892, -0.1944388218429342 -0.00701599228197813, -0.1959665472788131 -0.02314309560615933))
11	110780000	114770000	11:110780000-114760000	208	-0.269078	-0.0338783	-1.17602	0.161117	4	-0.321226	POLYGON ((-0.2939539977482778 -0.04562419938688998, -0.2880437425493944 -0.0208373466163651, -0.2540532760622092 -0.008815390532998613, -0.2418439629028663 -0.04043028097885751, -0.2631726717829868 -0.05812121149433171, -0.2939539977482778 -0.04562419938688998))
11	110780000	114770000	11:110780000-114760000	209	-0.281495	0.00122773	-3.75062	0.470111	2	-0.0085168	POLYGON ((-0.2594792343076162 0.03086009942678848, -0.2475458093716279 0.01899683236703558, -0.2462359337917351 0.01459745519750892, -0.2540532760622092 -0.008815390532998613, -0.2880437425493944 -0.0208373466163651, -0.3116355895044864 0.006707428161086344, -0.3109416294712576 0.009562735469867106, -0.2594792343076162 0.03086009942678848))
11	110780000	114770000	11:110780000-114760000	210	-0.295996	0.0362691	-2.12976	0.180496	1	0.112077	POLYGON ((-0.2742596668974556 0.08900893982327447, -0.2594792343076162 0.03086009942678848, -0.3109416294712576 0.009562735469867106, -0.331332559485227 0.05404748474780226, -0.3225470432866893 0.07516810768631345, -0.3008947918097286 0.09319432903228941, -0.2742596668974556 0.08900893982327447))
11	110780000	114770000	11:110780000-114760000	211	-0.340929	0.0156728	-3.75062	0.139637	2	-0.176077	POLYGON ((-0.331332559485227 0.05404748474780226, -0.3109416294712576 0.009562735469867106, -0.3116355895044864 0.006707428161086344, -0.326732018005058 -0.00476109044134904, -0.3872612267803808 0.0078032565745716, -0.3828140879032883 0.02580605346496423, -0.331332559485227 0.05404748474780226))
11	110780000	114770000	11:110780000-114760000	212	-0.347889	-0.0178563	-3.75062	0.49019	2	-0.000185348	POLYGON ((-0.3322646640447817 -0.03856795437797592, -0.4111405033818837 -0.02745897787143685, -0.4106242210824063 -0.02526432920651424, -0.3872612267803808 0.0078032565745716, -0.326732018005058 -0.00476109044134904, -0.3322646640447817 -0.03856795437797592))
11	110780000	114770000	11:110780000-114760000	213	-0.310853	-0.0239174	-3.75062	0.256815	3	0.126307	POLYGON ((-0.3247556369644305 -0.04903374339005317, -0.3322646640447817 -0.03856795437797592, -0.326732018005058 -0.00476109044134904, -0.3116355895044864 0.006707428161086344, -0.2880437425493944 -0.0208373466163651, -0.2939539977482778 -0.04562419938688998, -0.3080956578476284 -0.05353288335243428, -0.3247556369644305 -0.04903374339005317))
11	110780000	114770000	11:110780000-114760000	214	-0.353002	-0.0541584	-3.75062	0.289934	3	0.131807	POLYGON ((-0.3816486153261932 -0.1156745765453097, -0.3954561741290907 -0.1038867115531077, -0.4002402263227731 -0.09936692127121874, -0.4045456752228525 -0.09438909349668345, -0.4083288994927057 -0.08900366187905762, -0.4115515687971623 -0.08326518977071355, -0.4141810321523602 -0.07723181740960396, -0.4161906487343531 -0.07096467286224356, -0.4175600577948329 -0.06452725269503326, -0.4182753849…
11	110780000	114770000	11:110780000-114760000	215	-0.325387	-0.0777341	-3.75062	0.0811384	3	0.330516	POLYGON ((-0.2948615694060524 -0.139178946559556, -0.3154017818730586 -0.1423528342809302, -0.3216123365539426 -0.1430106941719872, -0.3278573252147452 -0.1430730296110087, -0.3340797742336397 -0.1425392719058925, -0.3402229156200827 -0.1414142905786331, -0.346230704914558 -0.1397083489402119, -0.3520483324874778 -0.1374370104574413, -0.357622723572614 -0.1346209967659858, -0.3629030224732074 -0.…
11	110780000	114770000	11:110780000-114760000	216	-0.284306	-0.0713863	-3.75062	0.185276	3	0.202116	POLYGON ((-0.2579412777149103 -0.1351316374271068, -0.2770848899806301 -0.1364320818596031, -0.2948615694060524 -0.139178946559556, -0.3080956578476284 -0.05353288335243428, -0.2939539977482778 -0.04562419938688998, -0.2631726717829868 -0.05812121149433171, -0.2579412777149103 -0.1351316374271068))
11	110780000	114770000	11:110780000-114760000	217	-0.240439	-0.0684064	-3.75062	0.49771	3	0.011842	POLYGON ((-0.1978542230608914 -0.123209131849093, -0.2199537356110084 -0.1305000561998051, -0.2252111688254151 -0.1319940097154218, -0.2305750047467692 -0.1330436598092914, -0.2360077648347386 -0.1336416722985725, -0.2579412777149103 -0.1351316374271068, -0.2631726717829868 -0.05812121149433171, -0.2418439629028663 -0.04043028097885751, -0.2234612699826363 -0.04559164089772137, -0.197854223060891…
11	110780000	114770000	11:110780000-114760000	218	-0.19624	-0.0538246	-3.75062	0.105978	2	-0.271816	POLYGON ((-0.1529295900342314 -0.1027205973693548, -0.1546241610756081 -0.1042564967741396, -0.1594772104115897 -0.1078963442353751, -0.1646467071057237 -0.1110707546259631, -0.1700881533628432 -0.1137524033780214, -0.1757547105107744 -0.1159182074983808, -0.1978542230608914 -0.123209131849093, -0.2234612699826363 -0.04559164089772137, -0.1959665472788131 -0.02314309560615933, -0.149290761613713 …
11	110780000	114770000	11:110780000-114760000	219	-0.165284	-0.0230334	-3.75062	0.00831983	2	-0.412025	POLYGON ((-0.149290761613713 -0.07006899352185351, -0.1959665472788131 -0.02314309560615933, -0.1944388218429342 -0.00701599228197813, -0.1773199144378632 0.009502897858182528, -0.1380785060049194 -0.01830090717078561, -0.1334595018816827 -0.04514850302598659, -0.149290761613713 -0.07006899352185351))
11	110780000	114770000	11:110780000-114760000	220	-0.129014	0.0104028	-3.75062	0.000259995	2	-0.548385	POLYGON ((-0.1099480517369412 0.02390846530283168, -0.104215610455019 0.01022448838814589, -0.133502580437727 -0.01186787460849642, -0.1379762655736575 0.02963969943471775, -0.1099480517369412 0.02390846530283168))
11	110780000	114770000	11:110780000-114760000	221	-0.0869486	0.0280248	-3.75062	0.000199996	2	-0.594943	POLYGON ((-0.06370821530550826 0.01058046784180507, -0.06812744185979275 -0.01046818445707526, -0.104215610455019 0.01022448838814589, -0.1099480517369412 0.02390846530283168, -0.1001659008211759 0.04573667022502255, -0.07436961623771178 0.04524114984982507, -0.06370821530550826 0.01058046784180507))
11	110780000	114770000	11:110780000-114760000	222	-0.0354145	0.017205	-1.55084	0.000539989	1	0.768582	POLYGON ((0.02050100090010021 -0.01728352153633373, 0.01663918050135912 -0.02236383001961067, 0.0123161499395394 -0.02748350866708034, 0.007491844028795845 -0.0321338608227078, 0.002216928452166214 -0.03626604769544409, -0.003453198727788577 -0.03983667235436894, -0.009458988868880695 -0.04280823549065677, -0.01288369948675399 -0.04408535705713951, -0.01283137091540051 -0.04414564873871998, -0.05…
11	110780000	114770000	11:110780000-114760000	223	-0.00895411	0.0520142	-3.75062	0.000959981	2	-0.540943	POLYGON ((0.01665746365785611 0.03309213431732967, -0.03456278179859143 0.05460467960969459, -0.03740804336627768 0.063855502326885, -0.03412317771094668 0.07058529582740732, -0.01935764564653499 0.07511089594932446, 0.01098340960060716 0.05317437101765649, 0.01665746365785611 0.03309213431732967))
11	110780000	114770000	11:110780000-114760000	224	0.0285802	0.0626192	-3.75062	0.0122798	2	-0.555115	POLYGON ((0.09344125678028523 0.0408962289944353, 0.08174823965374334 0.02456089210724059, 0.0778420904804545 0.01962452936121678, 0.07347935416069901 0.01508666529002613, 0.06870046698191845 0.01098935936334657, 0.06354972235115122 0.007370587710846331, 0.05807486025889018 0.004263891138111917, 0.05232662479807153 0.001698064251647494, 0.04635829383935711 -0.000303111425690103, 0.037006704460020…
11	110780000	114770000	11:110780000-114760000	225	0.0519662	0.0952899	-3.75062	0.0718186	2	-0.408772	POLYGON ((0.1023821263181762 0.1405295234219311, 0.1103492625710477 0.1247295776461453, 0.1129716684379639 0.1188188143902859, 0.114997413547212 0.1126779275202963, 0.1164066852057143 0.1063669776559576, 0.1171857001064272 0.09994768870918777, 0.1173268391352476 0.09348284419657978, 0.1168287218893567 0.08703567318853291, 0.1156962201781762 0.08066923190066827, 0.1139404103748941 0.07444578697584…
11	110780000	114770000	11:110780000-114760000	226	0.0360319	0.12689	-0.884478	0.120678	1	0.613728	POLYGON ((0.0432647541297726 0.1945262810421147, 0.06064038576754764 0.1874678271023277, 0.0667128355625464 0.1846302165222779, 0.07246287563567069 0.1811858414738466, 0.07783008180232219 0.1771708971054339, 0.08275805288058444 0.1726275743820736, 0.0871950033819493 0.1676036167224959, 0.0910943076981186 0.1621518182883373, 0.09441499006530482 0.1563294691977167, 0.1023821263181762 0.140529523421…
11	110780000	114770000	11:110780000-114760000	227	0.00128066	0.141007	-1.42887	0.0169997	1	0.728341	POLYGON ((-0.0293346927633162 0.202246161805862, -0.009297050259643155 0.2055310070934258, -0.0033641084487617 0.2062270978660651, 0.002607601754270243 0.2063788151889498, 0.00856823645113482 0.2059848927275528, 0.01446804418711655 0.2050486184229234, 0.0202577812101094 0.2035778070483261, 0.02588912249199756 0.2015847349819017, 0.0432647541297726 0.1945262810421147, 0.008362461028421093 0.108608…
11	110780000	114770000	11:110780000-114760000	228	-0.0387946	0.134437	-1.38884	0.000299994	1	1.13304	POLYGON ((-0.05509643115248634 0.2001075013688385, -0.04356922017087252 0.199912642767041, -0.0293346927633162 0.202246161805862, -0.01646642104988578 0.1237493664742676, -0.05331798396878651 0.1075452704583251, -0.05663537496706104 0.1090685127082908, -0.05509643115248634 0.2001075013688385))
11	110780000	114770000	11:110780000-114760000	229	-0.0736085	0.135025	-0.771267	0.00631987	1	1.02341	POLYGON ((-0.1191940085447712 0.185903870048992, -0.1012682098558509 0.1942725852889091, -0.09578591913776402 0.1965351619198422, -0.09012116426955394 0.1982916689114471, -0.08432055190445967 0.1995276546388654, -0.07843180646045921 0.2002329500551489, -0.07250337746861016 0.2004017523568818, -0.05509643115248634 0.2001075013688385, -0.05663537496706104 0.1090685127082908, -0.08139202222966781 0.…
11	110780000	114770000	11:110780000-114760000	230	-0.10946	0.118288	-0.665939	0.000799984	1	1.27522	POLYGON ((-0.1487083230754929 0.1705701879643037, -0.1485366766533731 0.1707122833411638, -0.1430021749820699 0.1744147652714447, -0.1371198072336915 0.177535154809075, -0.1191940085447712 0.185903870048992, -0.08139202222966781 0.1049319672778589, -0.08457108701396739 0.1012732064060504, -0.1472153623176126 0.09571010683408991, -0.1487083230754929 0.1705701879643037))
11	110780000	114770000	11:110780000-114760000	231	-0.106072	0.0801387	-0.597216	0.00425991	1	0.97526	POLYGON ((-0.1524448214499509 0.08432077900420919, -0.1472153623176126 0.09571010683408991, -0.08457108701396739 0.1012732064060504, -0.08503036284634362 0.08435100868119612, -0.1071682321080899 0.05889024576970325, -0.1523450850630624 0.07892618471785535, -0.1524448214499509 0.08432077900420919))
11	110780000	114770000	11:110780000-114760000	232	-0.0642479	0.0790036	-0.987942	0.000159997	1	1.18487	POLYGON ((-0.03412317771094668 0.07058529582740732, -0.03740804336627768 0.063855502326885, -0.0651496597528172 0.05710625886982524, -0.08503036284634362 0.08435100868119612, -0.08457108701396739 0.1012732064060504, -0.08139202222966781 0.1049319672778589, -0.05663537496706104 0.1090685127082908, -0.05331798396878651 0.1075452704583251, -0.03412317771094668 0.07058529582740732))
11	110780000	114770000	11:110780000-114760000	233	-0.0236832	0.10007	-1.08257	0.00223996	1	0.937679	POLYGON ((-0.01935764564653499 0.07511089594932446, -0.03412317771094668 0.07058529582740732, -0.05331798396878651 0.1075452704583251, -0.01646642104988578 0.1237493664742676, 0.008362461028421093 0.1086081191590544, 0.00953022071899539 0.1060080172790731, -0.01935764564653499 0.07511089594932446))
11	110780000	114770000	11:110780000-114760000	234	0.00583601	0.0724709	-1.93017	0.00181996	1	0.530092	POLYGON ((0.01098340960060716 0.05317437101765649, -0.01935764564653499 0.07511089594932446, 0.00953022071899539 0.1060080172790731, 0.02114271780094452 0.09956448177277494, 0.02643937111922604 0.08885692928213597, 0.01098340960060716 0.05317437101765649))
11	110780000	114770000	11:110780000-114760000	235	-0.0147844	0.0381325	-1.54214	0.0198796	1	0.568049	POLYGON ((0.03700670446002024 -0.002945318289962803, 0.03566997232706823 -0.003322999844841993, 0.03321410558020911 -0.00626812546492906, 0.02840222413453178 -0.01096115959045579, 0.02313397011435992 -0.01513539867435544, 0.02119493600106282 -0.01637063486210796, 0.02050100090010021 -0.01728352153633373, -0.03453510377305848 0.03697030660723183, -0.03456278179859143 0.05460467960969459, 0.0166574…
11	110780000	114770000	11:110780000-114760000	236	-0.0542893	0.0380705	-0.544194	0.000399992	1	1.36624	POLYGON ((-0.03456278179859143 0.05460467960969459, -0.03453510377305848 0.03697030660723183, -0.06370821530550826 0.01058046784180507, -0.07436961623771178 0.04524114984982507, -0.0651496597528172 0.05710625886982524, -0.03740804336627768 0.063855502326885, -0.03456278179859143 0.05460467960969459))
11	110780000	114770000	11:110780000-114760000	237	-0.0862782	0.0629279	-0.726515	0.000879982	1	1.10259	POLYGON ((-0.1071682321080899 0.05889024576970325, -0.08503036284634362 0.08435100868119612, -0.0651496597528172 0.05710625886982524, -0.07436961623771178 0.04524114984982507, -0.1001659008211759 0.04573667022502255, -0.1071682321080899 0.05889024576970325))
11	110780000	114770000	11:110780000-114760000	238	-0.122182	0.0438144	-3.75062	0.000219996	2	-0.554195	POLYGON ((-0.1669644532888157 0.04663676215175908, -0.1523450850630624 0.07892618471785535, -0.1071682321080899 0.05889024576970325, -0.1001659008211759 0.04573667022502255, -0.1099480517369412 0.02390846530283168, -0.1379762655736575 0.02963969943471775, -0.1669644532888157 0.04663676215175908))
11	110780000	114770000	11:110780000-114760000	239	-0.142633	0.00893493	-0.444863	0.00315994	1	1.10152	POLYGON ((-0.1773199144378632 0.009502897858182528, -0.170208073374197 0.04402302826487658, -0.1669644532888157 0.04663676215175908, -0.1379762655736575 0.02963969943471775, -0.133502580437727 -0.01186787460849642, -0.1380785060049194 -0.01830090717078561, -0.1773199144378632 0.009502897858182528))
11	110780000	114770000	11:110780000-114760000	240	-0.110856	-0.0136692	-0.333814	0.00291994	1	1.21593	POLYGON ((-0.06812744185979275 -0.01046818445707526, -0.06036451245341982 -0.02943688668829141, -0.1334595018816827 -0.04514850302598659, -0.1380785060049194 -0.01830090717078561, -0.133502580437727 -0.01186787460849642, -0.104215610455019 0.01022448838814589, -0.06812744185979275 -0.01046818445707526))
11	110780000	114770000	11:110780000-114760000	241	-0.0999169	-0.0645592	-0.2091	0.0457991	1	0.898261	POLYGON ((-0.1232113426499129 -0.1264752111411501, -0.13196844402828 -0.1215502512058873, -0.1371807491003898 -0.1182870968554436, -0.1420634427571162 -0.1145487010585644, -0.1465733359023263 -0.1103681312052611, -0.1506705369879748 -0.1057823658663758, -0.1529280083112968 -0.1027191637514925, -0.1529295900342314 -0.1027205973693548, -0.149290761613713 -0.07006899352185351, -0.1334595018816827 -0…
11	110780000	114770000	11:110780000-114760000	242	-0.06411	-0.0846969	-0.538773	0.00731985	1	1.31433	POLYGON ((-0.01283137091540051 -0.04414564873871998, -0.01268568026022833 -0.04431350989685393, -0.008974376395398949 -0.0495494730253108, -0.005794262807788837 -0.05512405496744375, -0.005176891877307595 -0.05650567719143229, -0.03520205516754223 -0.100098291450971, -0.1030769467574481 -0.1120811683373086, -0.05775560345492625 -0.03149501065869097, -0.01283137091540051 -0.04414564873871998))
11	110780000	114770000	11:110780000-114760000	243	-0.0570888	-0.124467	-0.585888	0.0147397	1	1.2751	POLYGON ((-0.08513046474459506 -0.1834807583256868, -0.08967692854421253 -0.1811531006861248, -0.09502136149005919 -0.1777250497159928, -0.1000081027800413 -0.1737947942187939, -0.1045901290516829 -0.1693993952366239, -0.1087242332746374 -0.1645802999646642, -0.1123714321790528 -0.1593829509174954, -0.1154973338552366 -0.1538563574208372, -0.1180724620582755 -0.1480526334694084, -0.12007253415952…
11	110780000	114770000	11:110780000-114760000	244	-0.0105073	-0.121617	-3.75062	0.000339993	2	-0.837757	POLYGON ((-0.005176891877307595 -0.05650567719143229, -0.005164784581424562 -0.0565327722622212, -0.0009626468546190415 -0.05693145959884981, 0.01812028217569606 -0.05974724263906919, 0.003018739206002163 -0.1620923695975971, 0.002323722408194857 -0.1625277231210481, -0.0313033241781941 -0.1638096130221342, -0.03520205516754223 -0.100098291450971, -0.005176891877307595 -0.05650567719143229))
11	110780000	114770000	11:110780000-114760000	245	0.0276586	-0.127248	-0.0973156	0.000319994	1	2.3722	POLYGON ((0.01812028217569606 -0.05974724263906919, 0.03720321120601116 -0.06256302567928858, 0.04353608987992494 -0.06381968477889449, 0.04971416065824379 -0.06569478100288331, 0.05567718651296732 -0.06817003190875789, 0.05586829675694219 -0.06827251795192869, 0.05908204115697806 -0.1130023381215776, 0.03108089606604564 -0.1595431527850464, 0.003018739206002163 -0.1620923695975971, 0.01812028217…
11	110780000	114770000	11:110780000-114760000	246	0.0612163	-0.147438	-1.06065	0.000379992	1	1.62334	POLYGON ((0.09584537943768412 -0.1589083284417349, 0.09586215591106728 -0.1590249039971111, 0.05709109229872234 -0.1757277823960123, 0.03108089606604564 -0.1595431527850464, 0.05908204115697806 -0.1130023381215776, 0.09584537943768412 -0.1589083284417349))
11	110780000	114770000	11:110780000-114760000	247	0.0922193	-0.12261	-0.842494	7.99984e-05	1	2.15508	POLYGON ((0.05586829675694219 -0.06827251795192869, 0.05589955517533906 -0.06828928079807781, 0.05668643837486725 -0.06772169009650567, 0.06238597672411887 -0.06442679125330979, 0.06838795372895393 -0.06172172788715469, 0.07463152370051267 -0.05963392286950261, 0.08105339177519305 -0.05818454154877152, 0.08758845557315326 -0.05738827718433399, 0.09417046518070502 -0.05725320199201654, 0.100732694…
11	110780000	114770000	11:110780000-114760000	248	0.125835	-0.138139	-0.618117	3.99992e-05	1	2.79265	POLYGON ((0.1364482533328635 -0.07101639585383622, 0.153256016189845 -0.07878097054969471, 0.1581218999243937 -0.08128091757155126, 0.1627617771656416 -0.08417886491689514, 0.1671431691953744 -0.08745452721817559, 0.1794595108309349 -0.09749249416296787, 0.1238141253594905 -0.1657680306015818, 0.1013676202958586 -0.1636465524650541, 0.09586215591106728 -0.1590249039971111, 0.09584537943768412 -0.…
11	110780000	114770000	11:110780000-114760000	249	0.150468	-0.158215	-0.920397	0.000179996	1	2.36568	POLYGON ((0.1794595108309349 -0.09749249416296787, 0.1917758524664955 -0.1075304611077602, 0.1966063763397305 -0.1118846120515368, 0.2009804780691146 -0.1166970776765657, 0.2048548874675599 -0.1219202513424822, 0.2081912774841889 -0.1275024635373045, 0.2109566433493028 -0.1333884930108246, 0.2131236290694309 -0.1395201130430711, 0.214670798042654 -0.1458366674439593, 0.2155828451171788 -0.1522756…
11	110780000	114770000	11:110780000-114760000	250	0.120623	-0.193287	-0.600273	1.99996e-05	1	2.74289	POLYGON ((0.1853412670316522 -0.2181254337970802, 0.1704188474830213 -0.2356613268250788, 0.1659724258046104 -0.2403894235383988, 0.1610791598853165 -0.2446534020697503, 0.1557872645004044 -0.2484112481959104, 0.1501488822374458 -0.2516259347637586, 0.1468694185354835 -0.2530860193889991, 0.1078000419767341 -0.2554843479049862, 0.09886922506236573 -0.2528572932096226, 0.1013676202958586 -0.163646…
11	110780000	114770000	11:110780000-114760000	251	0.0804839	-0.192162	-0.0503687	0.000279994	1	2.19667	POLYGON ((0.06496564153036632 -0.2540797069569158, 0.05671001175304766 -0.2514244695617101, 0.05709109229872234 -0.1757277823960123, 0.09586215591106728 -0.1590249039971111, 0.1013676202958586 -0.1636465524650541, 0.09886922506236573 -0.2528572932096226, 0.06496564153036632 -0.2540797069569158))
11	110780000	114770000	11:110780000-114760000	252	0.033534	-0.191926	-0.156948	0.00229995	1	1.58978	POLYGON ((0.05671001175304766 -0.2514244695617101, 0.02975201273743316 -0.2531872698663962, 0.002323722408194857 -0.1625277231210481, 0.003018739206002163 -0.1620923695975971, 0.03108089606604564 -0.1595431527850464, 0.05709109229872234 -0.1757277823960123, 0.05671001175304766 -0.2514244695617101))
11	110780000	114770000	11:110780000-114760000	253	-0.00735545	-0.204297	-3.75062	0.00583988	2	-0.521737	POLYGON ((0.02975201273743316 -0.2531872698663962, 0.02515264762383085 -0.2552453165177963, 0.01616250914829754 -0.2560757404072329, 0.00659462679891229 -0.2532121975530351, -0.05360373493671553 -0.1777026231465123, -0.0313033241781941 -0.1638096130221342, 0.002323722408194857 -0.1625277231210481, 0.02975201273743316 -0.2531872698663962))
11	110780000	114770000	11:110780000-114760000	254	-0.0379828	-0.228714	-3.75062	0.0105798	2	-0.493709	POLYGON ((-0.1021797552546027 -0.2055267561464479, -0.0905200252763763 -0.189789353084183, -0.08695215348853663 -0.1853862687848826, -0.08511873221573722 -0.1834867650402744, -0.08513046474459506 -0.1834807583256868, -0.05360373493671553 -0.1777026231465123, 0.00659462679891229 -0.2532121975530351, -0.03231332016073121 -0.2572903009011177, -0.1021797552546027 -0.2055267561464479))
11	110780000	114770000	11:110780000-114760000	255	-0.0613022	-0.260189	-3.75062	0.0935981	2	-0.264082	POLYGON ((-0.1200160093175713 -0.2315219241105765, -0.1174779304598447 -0.2267286781369465, -0.1138394852328292 -0.2212641592087127, -0.1021797552546027 -0.2055267561464479, -0.03231332016073121 -0.2572903009011177, -0.05422412368805547 -0.2818199326941176, -0.06098116448213824 -0.282951503672266, -0.1084598806228904 -0.2618866716756487, -0.1200160093175713 -0.2315219241105765))
11	110780000	114770000	11:110780000-114760000	256	-0.0538687	-0.304577	-1.27361	0.279394	1	0.178176	POLYGON ((-0.02964409758006076 -0.341329780684095, -0.07151839233916393 -0.3216638604100729, -0.06098116448213824 -0.282951503672266, -0.05422412368805547 -0.2818199326941176, -0.02654286180816045 -0.3152624311561794, -0.02964409758006076 -0.341329780684095))
11	110780000	114770000	11:110780000-114760000	257	-0.0733967	-0.346158	-3.75062	0.134097	2	-0.230818	POLYGON ((-0.01445311116260753 -0.3744046935911724, -0.01723704851697529 -0.3796445375363105, -0.02080680404215264 -0.3850109649193093, -0.0248875607241953 -0.3899998648249496, -0.02943966697959324 -0.3945627614933063, -0.03441889125145738 -0.3986553185200333, -0.03977685179531869 -0.4022377696609365, -0.0454614867911517 -0.4052753052295652, -0.05141756021367386 -0.4077384103333029, -0.0575871985…
11	110780000	114770000	11:110780000-114760000	258	-0.12097	-0.338956	-3.75062	0.0895382	2	-0.242112	POLYGON ((-0.1557550858431989 -0.3516732847600713, -0.1464297759888295 -0.322333863613421, -0.1202530523535873 -0.3090492909959934, -0.1058817751404244 -0.356596023226141, -0.1510899768127617 -0.3587515382735733, -0.1557550858431989 -0.3516732847600713))
11	110780000	114770000	11:110780000-114760000	259	-0.144814	-0.291971	-0.817741	0.203576	1	0.335302	POLYGON ((-0.1904748808297959 -0.244790086402775, -0.190325547267504 -0.2449858317502361, -0.1889158070195747 -0.2436979234463015, -0.1840376113432292 -0.2396569251378956, -0.1787912767677229 -0.2361069344467668, -0.1732260437906474 -0.2330812705037409, -0.1673941459928129 -0.230608331268566, -0.161350319789775 -0.2287113269953161, -0.1551512906925194 -0.2274080623880191, -0.148855240899101 -0.22…
11	110780000	114770000	11:110780000-114760000	260	-0.176814	-0.321206	-3.75062	0.0758185	2	-0.223113	POLYGON ((-0.201139416626975 -0.3405607674307257, -0.1914525387375566 -0.273052093687756, -0.1464297759888295 -0.322333863613421, -0.1557550858431989 -0.3516732847600713, -0.194576547642967 -0.3487357749556556, -0.201139416626975 -0.3405607674307257))
11	110780000	114770000	11:110780000-114760000	261	-0.219041	-0.315147	-0.88483	0.0887982	1	0.491052	POLYGON ((-0.2422652479159464 -0.3348419802799251, -0.2517157789612535 -0.316201109983792, -0.2504289778175345 -0.3110536439495075, -0.1932155077955408 -0.2674056523099539, -0.1914525387375566 -0.273052093687756, -0.201139416626975 -0.3405607674307257, -0.2422652479159464 -0.3348419802799251))
11	110780000	114770000	11:110780000-114760000	262	-0.246084	-0.279699	-3.75062	0.0560789	2	-0.389299	POLYGON ((-0.2964829206205876 -0.2335950600711068, -0.2794991696274823 -0.2234971644260526, -0.273897045690428 -0.2205241905074453, -0.2680332487179088 -0.2181079430880134, -0.2619629460623538 -0.2162711545327364, -0.2557432479080886 -0.215031105583434, -0.2494326699714121 -0.2143994627793361, -0.2430905829772481 -0.2143821686967879, -0.2367766540917657 -0.2149793860407317, -0.2305502855660439 -0…
11	110780000	114770000	11:110780000-114760000	263	-0.280051	-0.299895	-3.75062	0.0812784	2	-0.321307	POLYGON ((-0.3400804117202966 -0.2740858034636517, -0.3397220209535894 -0.273162052279543, -0.3366833623322696 -0.2672138727499466, -0.3330537221761281 -0.2616067345966499, -0.3288709772707285 -0.256399150608889, -0.3241787762768291 -0.251645464064103, -0.3190260842386827 -0.247395281633518, -0.3134666716136928 -0.243692955716161, -0.2964829206205876 -0.2335950600711068, -0.2504289778175345 -0.31…
11	110780000	114770000	11:110780000-114760000	264	-0.271879	-0.341935	-3.75062	0.0187196	2	-0.382308	POLYGON ((-0.2508340209456472 -0.3567842115702937, -0.2881644246493923 -0.3597315037741404, -0.2786845030368634 -0.3214435473626802, -0.2517157789612535 -0.316201109983792, -0.2422652479159464 -0.3348419802799251, -0.2508340209456472 -0.3567842115702937))
11	110780000	114770000	11:110780000-114760000	265	-0.300105	-0.392477	-2.01037	0.00855983	1	0.365894	POLYGON ((-0.2904334398870197 -0.4269808810993617, -0.319787651908668 -0.4059021621192431, -0.3223420509161932 -0.3692366915730237, -0.3121990155002335 -0.3628709804535073, -0.2956351027674216 -0.3645957810408875, -0.277429636512408 -0.3962488693744773, -0.2883516222553712 -0.4269865567362013, -0.2904334398870197 -0.4269808810993617))
11	110780000	114770000	11:110780000-114760000	266	-0.257458	-0.40763	-0.521126	0.0330593	1	0.7324	POLYGON ((-0.277429636512408 -0.3962488693744773, -0.2419569242011208 -0.3834855163228559, -0.2288183309653025 -0.3923810962168872, -0.2275502539262778 -0.408460383343737, -0.2467276806621418 -0.4257579589230742, -0.2856191963684077 -0.4291620063315769, -0.2883516222553712 -0.4269865567362013, -0.277429636512408 -0.3962488693744773))
11	110780000	114770000	11:110780000-114760000	267	-0.229799	-0.438295	-0.891342	0.0395592	1	0.588069	POLYGON ((-0.2275502539262778 -0.408460383343737, -0.2113597842949474 -0.4229623853088169, -0.2029406958876476 -0.4423517511736516, -0.2368221677131211 -0.4593514485796513, -0.2467276806621418 -0.4257579589230742, -0.2275502539262778 -0.408460383343737))
11	110780000	114770000	11:110780000-114760000	268	-0.198142	-0.402952	-3.75062	0.00721986	2	-0.418726	POLYGON ((-0.2070971102188847 -0.378609100695574, -0.175503292034219 -0.4006649482203581, -0.2113597842949474 -0.4229623853088169, -0.2275502539262778 -0.408460383343737, -0.2288183309653025 -0.3923810962168872, -0.2070971102188847 -0.378609100695574))
11	110780000	114770000	11:110780000-114760000	269	-0.168063	-0.43423	-0.471202	0.098838	1	0.692304	POLYGON ((-0.1089495397706467 -0.4621496218826406, -0.1090344563503575 -0.4623525451356259, -0.112020586653272 -0.4679123389519881, -0.1155288090622523 -0.4731583523903595, -0.1195264411515054 -0.4780417138499913, -0.1239762411789541 -0.4825169301779649, -0.1288367550284572 -0.4865423104811452, -0.1340627023942977 -0.4900803545164717, -0.1396053986102624 -0.4930981020413608, -0.1454132081935759 -…
11	110780000	114770000	11:110780000-114760000	270	-0.181159	-0.378625	-1.6995	0.0232595	1	0.368061	POLYGON ((-0.194576547642967 -0.3487357749556556, -0.1557550858431989 -0.3516732847600713, -0.1510899768127617 -0.3587515382735733, -0.1501505433417618 -0.3779354574787393, -0.170665178401386 -0.4014150696371701, -0.175503292034219 -0.4006649482203581, -0.2070971102188847 -0.378609100695574, -0.194576547642967 -0.3487357749556556))
11	110780000	114770000	11:110780000-114760000	271	-0.225295	-0.360126	-1.49959	0.00545989	1	0.55034	POLYGON ((-0.2419569242011208 -0.3834855163228559, -0.2508340209456472 -0.3567842115702937, -0.2422652479159464 -0.3348419802799251, -0.201139416626975 -0.3405607674307257, -0.194576547642967 -0.3487357749556556, -0.2070971102188847 -0.378609100695574, -0.2288183309653025 -0.3923810962168872, -0.2419569242011208 -0.3834855163228559))
11	110780000	114770000	11:110780000-114760000	272	-0.269288	-0.374752	-3.75062	0.0117398	2	-0.378111	POLYGON ((-0.2508340209456472 -0.3567842115702937, -0.2419569242011208 -0.3834855163228559, -0.277429636512408 -0.3962488693744773, -0.2956351027674216 -0.3645957810408875, -0.2881644246493923 -0.3597315037741404, -0.2508340209456472 -0.3567842115702937))
11	110780000	114770000	11:110780000-114760000	273	-0.294265	-0.336392	-0.364372	0.0359193	1	0.817605	POLYGON ((-0.2881644246493923 -0.3597315037741404, -0.2956351027674216 -0.3645957810408875, -0.3121990155002335 -0.3628709804535073, -0.3160617373904428 -0.3068870377416511, -0.2786845030368634 -0.3214435473626802, -0.2881644246493923 -0.3597315037741404))
11	110780000	114770000	11:110780000-114760000	274	-0.3336	-0.339106	-0.232212	0.136797	1	0.635636	POLYGON ((-0.3993871833360774 -0.3154500573641552, -0.3833146668212368 -0.296635909760694, -0.3788562332932034 -0.2919135275231796, -0.3739513153826479 -0.2876567325067623, -0.368648303434096 -0.2839075208836873, -0.362999515259975 -0.2807028811714896, -0.3570606799898818 -0.2780744293161609, -0.3508903882648919 -0.2760480967793828, -0.3445495142011154 -0.2746438747070556, -0.3400908522418273 -0.…
11	110780000	114770000	11:110780000-114760000	275	-0.365745	-0.376734	-0.915456	0.0824784	1	0.83653	POLYGON ((-0.3933857276864834 -0.4387458404753671, -0.3940163515516497 -0.4373298465336942, -0.4051780503494332 -0.4288910156523323, -0.4099913104323762 -0.4248752465961442, -0.4143979042957071 -0.4204170177704401, -0.4183573311518599 -0.4155573045371865, -0.4218332001032485 -0.410340772281803, -0.4247935646092171 -0.4048153658957997, -0.4272112161051253 -0.3990318691176371, -0.4290639340749278 -…
11	110780000	114770000	11:110780000-114760000	276	-0.341142	-0.395336	-2.16192	0.00613988	1	0.358957	POLYGON ((-0.319787651908668 -0.4059021621192431, -0.3931743226222814 -0.4385854841131394, -0.3390487862066354 -0.3669958358273561, -0.3223420509161932 -0.3692366915730237, -0.319787651908668 -0.4059021621192431))
11	110780000	114770000	11:110780000-114760000	277	-0.326219	-0.428843	-3.75062	0.000579988	2	-0.78638	POLYGON ((-0.3644241796198358 -0.4858449140334323, -0.3773872646605571 -0.4695506133616343, -0.3806348278421711 -0.4650951286020025, -0.3834954847559356 -0.4603818862908523, -0.3859488956082602 -0.4554443984426058, -0.3933857276864834 -0.4387458404753671, -0.3931743226222814 -0.4385854841131394, -0.319787651908668 -0.4059021621192431, -0.2904334398870197 -0.4269808810993617, -0.3644241796198358 -…
11	110780000	114770000	11:110780000-114760000	278	-0.300293	-0.461432	-1.78846	0.103998	1	0.353325	POLYGON ((-0.2610860344352225 -0.5170586781680319, -0.2789239905283898 -0.5232270667406479, -0.2848659272849869 -0.5249714999482941, -0.2909462451175509 -0.526145976295583, -0.2971104029888198 -0.5267399606164289, -0.3033031078082999 -0.5267481248141981, -0.3094688104166193 -0.526170395655249, -0.3155522038668442 -0.5250119554258461, -0.3214987195331253 -0.5232831954465514, -0.3272550165965341 -0…
11	110780000	114770000	11:110780000-114760000	279	-0.254146	-0.445474	-0.863634	0.0550389	1	0.618133	POLYGON ((-0.2856191963684077 -0.4291620063315769, -0.2467276806621418 -0.4257579589230742, -0.2368221677131211 -0.4593514485796513, -0.2602481460144783 -0.5025308735686479, -0.2856191963684077 -0.4291620063315769))
11	110780000	114770000	11:110780000-114760000	280	-0.215744	-0.466308	-3.75062	0.0292794	2	-0.467747	POLYGON ((-0.1591081329520642 -0.499016417059421, -0.1598718973657267 -0.5002728141538478, -0.1635987780909924 -0.5057564182725343, -0.1678618290468055 -0.5108344051392929, -0.1726172164050979 -0.5154545615374493, -0.1778160440034682 -0.5195693817854378, -0.1834048561085777 -0.5231365562029023, -0.1893261870622721 -0.5261194061501259, -0.1955191521588211 -0.528487261167596, -0.2019200736777169 -0…
11	110780000	114770000	11:110780000-114760000	281	-0.187567	-0.419958	-3.75062	0.0191996	2	-0.365951	POLYGON ((-0.2113597842949474 -0.4229623853088169, -0.175503292034219 -0.4006649482203581, -0.170665178401386 -0.4014150696371701, -0.1674945601613965 -0.4129901954383312, -0.1932788081681717 -0.4482252174859128, -0.2029406958876476 -0.4423517511736516, -0.2113597842949474 -0.4229623853088169))
11	110780000	114770000	11:110780000-114760000	282	-0.146673	-0.408756	-3.75062	0.0553989	2	-0.323777	POLYGON ((-0.08257815432469529 -0.433865094712692, -0.0963031200554309 -0.450447156915666, -0.1008103040516245 -0.4553595491572646, -0.1057942823256112 -0.4597874454608481, -0.1088964049948932 -0.4620226468963745, -0.1089495397706467 -0.4621496218826406, -0.1674945601613965 -0.4129901954383312, -0.170665178401386 -0.4014150696371701, -0.1501505433417618 -0.3779354574787393, -0.08257815432469529 -…
11	110780000	114770000	11:110780000-114760000	283	-0.119223	-0.375592	-1.05158	0.0566189	1	0.5522	POLYGON ((-0.06419238784123862 -0.4108786412391702, -0.06422538125025255 -0.4108818279702528, -0.06464076824100637 -0.411592563849661, -0.06885318859395972 -0.4172830325097182, -0.08257815432469529 -0.433865094712692, -0.1501505433417618 -0.3779354574787393, -0.1510899768127617 -0.3587515382735733, -0.1058817751404244 -0.356596023226141, -0.09682614150030375 -0.3600709669234798, -0.06419238784123…
11	110780000	114770000	11:110780000-114760000	284	-0.103091	-0.333552	-0.104691	0.332293	1	0.192284	POLYGON ((-0.09682614150030375 -0.3600709669234798, -0.1058817751404244 -0.356596023226141, -0.1202530523535873 -0.3090492909959934, -0.1119619857431543 -0.3007296877058707, -0.08090830754457218 -0.3225754523786197, -0.09682614150030375 -0.3600709669234798))
11	110780000	114770000	11:110780000-114760000	285	-0.078073	-0.297989	-3.75062	0.180836	2	-0.181084	POLYGON ((-0.08090830754457218 -0.3225754523786197, -0.1119619857431543 -0.3007296877058707, -0.1084598806228904 -0.2618866716756487, -0.06098116448213824 -0.282951503672266, -0.07151839233916393 -0.3216638604100729, -0.08090830754457218 -0.3225754523786197))
11	110780000	114770000	11:110780000-114760000	286	-0.0319342	-0.286421	-3.75062	0.0115598	2	-0.448771	POLYGON ((-0.03231332016073121 -0.2572903009011177, 0.00659462679891229 -0.2532121975530351, 0.01616250914829754 -0.2560757404072329, -0.02654286180816045 -0.3152624311561794, -0.05422412368805547 -0.2818199326941176, -0.03231332016073121 -0.2572903009011177))
11	110780000	114770000	11:110780000-114760000	287	0.00252724	-0.311286	-0.993951	0.0680986	1	0.59796	POLYGON ((0.01840355667544244 -0.3776468141740282, -0.001072584587286488 -0.3765729200532635, -0.007248713959295921 -0.375937146645145, -0.01333669674765864 -0.3747184393731279, -0.01444279460017445 -0.3743852760647274, -0.01445311116260753 -0.3744046935911724, -0.02964409758006076 -0.341329780684095, -0.02654286180816045 -0.3152624311561794, 0.01616250914829754 -0.2560757404072329, 0.02515264762…
11	110780000	114770000	11:110780000-114760000	288	0.0414795	-0.313434	-0.98097	0.00677986	1	1.13235	POLYGON ((0.06125804491698586 -0.3794334624827626, 0.03954645492146655 -0.3787912972983147, 0.03787969793817136 -0.3787207082947929, 0.01840355667544244 -0.3776468141740282, 0.02515264762383085 -0.2552453165177963, 0.02975201273743316 -0.2531872698663962, 0.05671001175304766 -0.2514244695617101, 0.06496564153036632 -0.2540797069569158, 0.06125804491698586 -0.3794334624827626))
11	110780000	114770000	11:110780000-114760000	289	0.0849027	-0.314719	-0.814671	9.9998e-05	1	2.05079	POLYGON ((0.09317733975376052 -0.3802969333197596, 0.08349919969271938 -0.3800891438058807, 0.08296963491250513 -0.3800756276672105, 0.06125804491698586 -0.3794334624827626, 0.06496564153036632 -0.2540797069569158, 0.09886922506236573 -0.2528572932096226, 0.1078000419767341 -0.2554843479049862, 0.1054606696194149 -0.364444482160186, 0.09317733975376052 -0.3802969333197596))
11	110780000	114770000	11:110780000-114760000	290	0.128134	-0.315647	-1.20983	3.99992e-05	1	1.92186	POLYGON ((0.1468694185354835 -0.2530860193889991, 0.1468433968590175 -0.2530976047740449, 0.1513197487868817 -0.25451006628998, 0.1708763031103264 -0.2619267996740853, 0.138891792533017 -0.3462640390245599, 0.1054606696194149 -0.364444482160186, 0.1078000419767341 -0.2554843479049862, 0.1468694185354835 -0.2530860193889991))
11	110780000	114770000	11:110780000-114760000	291	0.167247	-0.33048	-0.197602	0.000219996	1	2.88603	POLYGON ((0.1708763031103264 -0.2619267996740853, 0.1904328574337711 -0.2693435330581905, 0.1964648194783561 -0.2719857919580063, 0.2022004123016841 -0.2752213866739678, 0.2075814571707097 -0.279017497093661, 0.2125533716939375 -0.283335617538332, 0.2170657234755052 -0.2881319473435427, 0.2210727416739683 -0.2933578351492802, 0.2245337812768132 -0.2989602723928831, 0.2274137353813508 -0.304882430…
11	110780000	114770000	11:110780000-114760000	292	0.158745	-0.371935	-1.60902	1.99996e-05	1	1.26619	POLYGON ((0.1000375874029296 -0.4007735222674138, 0.1000969636502841 -0.4007533691376377, 0.09791568264469386 -0.3959168730405773, 0.09589156971192853 -0.3899566642492576, 0.09444994730701953 -0.38382944246101, 0.09397327132266974 -0.3803140219579422, 0.09317733975376052 -0.3802969333197596, 0.1054606696194149 -0.364444482160186, 0.138891792533017 -0.3462640390245599, 0.1829105282173523 -0.355292…
11	110780000	114770000	11:110780000-114760000	293	0.205684	-0.373795	-0.813077	0.000359993	1	2.29289	POLYGON ((0.2302522855709126 -0.3132819002493887, 0.2302539015542997 -0.313288199666709, 0.2333396224943179 -0.314546056866682, 0.2390759241111958 -0.3175789031214414, 0.2444833784968509 -0.3211653707027623, 0.2602379456804244 -0.3327798947224314, 0.2130339894656215 -0.3968098883973472, 0.1813266746570018 -0.3952681820738586, 0.1829105282173523 -0.35529225167073, 0.2302522855709126 -0.31328190024…
11	110780000	114770000	11:110780000-114760000	294	0.237193	-0.397024	-0.40972	0.00185996	1	2.09391	POLYGON ((0.2602379456804244 -0.3327798947224314, 0.2759925128639978 -0.3443944187421005, 0.280879244431101 -0.348374350779052, 0.2853601041451319 -0.3528062691730265, 0.2893934620231064 -0.3576489986364445, 0.2929418456533566 -0.3628575471905283, 0.29597228833762 -0.3683835241688616, 0.2984566353722388 -0.3741755897968786, 0.3003718056229266 -0.3801799321704076, 0.3017000059629094 -0.38634076720…
11	110780000	114770000	11:110780000-114760000	295	0.203486	-0.419003	-0.770522	0.00529989	1	1.31677	POLYGON ((0.2560529191169183 -0.4627842441041889, 0.2489164902918828 -0.4674375904885, 0.2146166847223446 -0.4707244474472657, 0.1668593909029016 -0.4090203147451571, 0.1813266746570018 -0.3952681820738586, 0.2130339894656215 -0.3968098883973472, 0.2560529191169183 -0.4627842441041889))
11	110780000	114770000	11:110780000-114760000	296	0.167339	-0.44698	-0.691746	0.00639987	1	1.32703	POLYGON ((0.1292126005294077 -0.413331735491237, 0.1668593909029016 -0.4090203147451571, 0.2146166847223446 -0.4707244474472657, 0.2064269148175221 -0.4756584661862606, 0.16296133772759 -0.4814803400769507, 0.1494736442302831 -0.4730259247221181, 0.1292126005294077 -0.413331735491237))
11	110780000	114770000	11:110780000-114760000	297	0.119445	-0.463236	-0.694133	0.0206996	1	1.13174	POLYGON ((0.05447495757385613 -0.4349548034733364, 0.07417992364175038 -0.4160513569466917, 0.0795999656579565 -0.411393029408975, 0.08549603669443578 -0.4073540670126561, 0.09179769622546544 -0.4039827233545471, 0.09842965814822456 -0.4013192759717063, 0.1000375874029296 -0.4007735222674138, 0.1292126005294077 -0.413331735491237, 0.1494736442302831 -0.4730259247221181, 0.1068040894971265 -0.4895…
11	110780000	114770000	11:110780000-114760000	298	0.080035	-0.501043	-0.451805	0.0570789	1	0.962452	POLYGON ((0.0275674531219701 -0.4538852913438381, 0.04216272587828623 -0.4467662226190959, 0.05447495757385613 -0.4349548034733364, 0.1068040894971265 -0.4895027277080514, 0.1069870168277217 -0.5063100561449233, 0.06335106956013888 -0.5272476456511254, 0.0275674531219701 -0.4538852913438381))
11	110780000	114770000	11:110780000-114760000	299	0.0324293	-0.524263	-1.35168	0.0144997	1	0.888108	POLYGON ((-0.0281319375441439 -0.4885006736512107, -0.007664793031155442 -0.4726127736497799, -0.002133774009364701 -0.4687591521099069, 0.003764621540644195 -0.4654954884741106, 0.0275674531219701 -0.4538852913438381, 0.06335106956013888 -0.5272476456511254, 0.0628605785614967 -0.5320085903652551, 0.02400995516824955 -0.5556710141763389, -0.0281319375441439 -0.4885006736512107))
11	110780000	114770000	11:110780000-114760000	300	-0.00850494	-0.556039	-1.78048	0.00275994	1	1.02591	POLYGON ((-0.07735330585152757 -0.5629987447137444, -0.07212685416609201 -0.5409545970003086, -0.07037022242028086 -0.534873526099571, -0.06803382880862101 -0.5289908019617598, -0.06513956851962378 -0.5233615537197898, -0.06171456471195225 -0.5180385350923918, -0.05779091433350367 -0.5130716300099597, -0.05340538732931634 -0.508507385134218, -0.04859908205713235 -0.5043885736526416, -0.0281319375…
11	110780000	114770000	11:110780000-114760000	301	-0.0189578	-0.600127	-1.04847	0.0235595	1	1.40817	POLYGON ((0.00154922214197788 -0.6657690583908084, -0.01975969199110133 -0.6655077209349007, -0.02625154814381333 -0.6651045618357248, -0.03267122826517894 -0.6640584066340024, -0.0389552053354125 -0.6623796077337387, -0.04504129520699749 -0.6600847779706106, -0.05086927195833293 -0.6571966262168689, -0.05638146386942729 -0.6537437326618902, -0.06152332412206206 -0.6497602659921261, -0.0662439705…
11	110780000	114770000	11:110780000-114760000	302	0.02366	-0.60065	-1.00969	0.297634	1	0.229945	POLYGON ((0.0896828480511354 -0.6238035152419117, 0.07362292979296986 -0.642827680556941, 0.06925662372972438 -0.6475135930193231, 0.06445280605708348 -0.6517498342791035, 0.05925757065042446 -0.6554957565036618, 0.05372076713971016 -0.6587154165985762, 0.04789552258937207 -0.6613779210909291, 0.04183773173036025 -0.6634577225601842, 0.03560552063571597 -0.6649348647723072, 0.02925868898583875 -0…
11	110780000	114770000	11:110780000-114760000	303	0.0557798	-0.562601	-1.54736	0.0721986	1	0.509599	POLYGON ((0.1168090618023938 -0.5968926212659921, 0.1020203024428212 -0.6091888846976542, 0.0896828480511354 -0.6238035152419117, 0.02281703061983157 -0.5673563836895066, 0.02400995516824955 -0.5556710141763389, 0.0628605785614967 -0.5320085903652551, 0.1168090618023938 -0.5968926212659921))
11	110780000	114770000	11:110780000-114760000	304	0.0942318	-0.53063	-3.75062	0.00443991	2	-0.647468	POLYGON ((0.1458984432975162 -0.5734627842388008, 0.1349699565720447 -0.5817925617672368, 0.1168090618023938 -0.5968926212659921, 0.0628605785614967 -0.5320085903652551, 0.06335106956013888 -0.5272476456511254, 0.1069870168277217 -0.5063100561449233, 0.1413091429693885 -0.5513399382334535, 0.1458984432975162 -0.5734627842388008))
11	110780000	114770000	11:110780000-114760000	305	0.133818	-0.500457	-3.75062	0.00295994	2	-0.660289	POLYGON ((0.16296133772759 -0.4814803400769507, 0.1413091429693885 -0.5513399382334535, 0.1069870168277217 -0.5063100561449233, 0.1068040894971265 -0.4895027277080514, 0.1494736442302831 -0.4730259247221181, 0.16296133772759 -0.4814803400769507))
11	110780000	114770000	11:110780000-114760000	306	0.176264	-0.513613	-3.75062	0.103338	2	-0.263047	POLYGON ((0.1738610322724223 -0.5806710179973322, 0.1593008043180777 -0.5767597101126641, 0.1569068207532705 -0.5760674411412297, 0.1466513866393542 -0.5728888849710816, 0.1458984432975162 -0.5734627842388008, 0.1413091429693885 -0.5513399382334535, 0.16296133772759 -0.4814803400769507, 0.2064269148175221 -0.4756584661862606, 0.1796352589420282 -0.5753930379264859, 0.1738610322724223 -0.580671017…
11	110780000	114770000	11:110780000-114760000	307	0.213511	-0.523618	-1.2289	0.385892	1	0.0955957	POLYGON ((0.2489164902918828 -0.4674375904885, 0.2487129919962094 -0.4675702826348945, 0.2572037659629733 -0.4712115524251643, 0.2204094677643876 -0.5570091140627902, 0.1796352589420282 -0.5753930379264859, 0.2064269148175221 -0.4756584661862606, 0.2146166847223446 -0.4707244474472657, 0.2489164902918828 -0.4674375904885))
11	110780000	114770000	11:110780000-114760000	308	0.249355	-0.53899	-3.75062	0.122618	2	-0.296235	POLYGON ((0.2572037659629733 -0.4712115524251643, 0.2751259474891938 -0.4788974828742151, 0.280795828934332 -0.4816599923459506, 0.2861731728210518 -0.4849559272523632, 0.2912079460478889 -0.4887546208090581, 0.2958533029369375 -0.4930207283506842, 0.3000660211060211 -0.497714556192779, 0.3038069036281746 -0.5027924309587413, 0.3070411437365745 -0.5082071059355584, 0.309738648681545 -0.5139082006…
11	110780000	114770000	11:110780000-114760000	309	0.240865	-0.584288	-3.75062	0.184136	3	0.203303	POLYGON ((0.1724453009552332 -0.5887205181922237, 0.1743882470058347 -0.5808126434684564, 0.1738610322724223 -0.5806710179973322, 0.1796352589420282 -0.5753930379264859, 0.2204094677643876 -0.5570091140627902, 0.3042220720360829 -0.5727187230750035, 0.3043805460780782 -0.5740747305052328, 0.2946007707713475 -0.6187338271948633, 0.1724453009552332 -0.5887205181922237))
11	110780000	114770000	11:110780000-114760000	310	0.23102	-0.624356	-3.75062	0.249675	3	0.140943	POLYGON ((0.1666642244809315 -0.6008970095418648, 0.1707768109822403 -0.5955113447724084, 0.1724453009552332 -0.5887205181922237, 0.2946007707713475 -0.6187338271948633, 0.2957566891115421 -0.6288714157181375, 0.280108349730415 -0.6596500201680653, 0.2532601687864077 -0.6670231660821906, 0.1666642244809315 -0.6008970095418648))
11	110780000	114770000	11:110780000-114760000	311	0.206242	-0.656804	-3.75062	0.0344793	3	0.368566	POLYGON ((0.1417175590280063 -0.6343377092233328, 0.1533850503184989 -0.6183147761717909, 0.15427521272067 -0.6171211215804533, 0.1666642244809315 -0.6008970095418648, 0.2532601687864077 -0.6670231660821906, 0.2225607967314819 -0.6932056935534399, 0.1417175590280063 -0.6343377092233328))
11	110780000	114770000	11:110780000-114760000	312	0.182907	-0.68885	-3.75062	0.154377	3	0.222282	POLYGON ((0.1279884426912183 -0.6487604279697188, 0.1354558266073356 -0.6429369287869104, 0.1417175590280063 -0.6343377092233328, 0.2225607967314819 -0.6932056935534399, 0.2164846377725798 -0.7101312656997956, 0.1906082814358966 -0.7290568892540784, 0.1279884426912183 -0.6487604279697188))
11	110780000	114770000	11:110780000-114760000	313	0.153489	-0.711792	-3.75062	0.237115	3	0.146421	POLYGON ((0.09871825644592526 -0.6762066177112287, 0.09871946871513916 -0.6762068080359471, 0.100559001180412 -0.6734030863626904, 0.1043811292626361 -0.6686212276818809, 0.1086337123881069 -0.6642177776388895, 0.1132794746562435 -0.6602313345541184, 0.1279884426912183 -0.6487604279697188, 0.1906082814358966 -0.7290568892540784, 0.1850984374505147 -0.7400060044564678, 0.1200900864039003 -0.723209…
11	110780000	114770000	11:110780000-114760000	314	0.143778	-0.749377	-3.75062	0.0715386	3	0.256237	POLYGON ((0.1851966679542154 -0.7501971152523267, 0.1654380534930153 -0.7851858744605807, 0.1602580791640454 -0.7886454498244337, 0.1139394131665516 -0.7624448857959274, 0.1200900864039003 -0.7232091489738238, 0.1850984374505147 -0.7400060044564678, 0.1851966679542154 -0.7501971152523267))
11	110780000	114770000	11:110780000-114760000	315	0.118111	-0.794751	-3.75062	0.111298	3	0.202242	POLYGON ((0.1602580791640454 -0.7886454498244337, 0.1534688499891722 -0.8089083228276025, 0.09600178332878662 -0.8204049244907463, 0.101889904551861 -0.7688366581147301, 0.1139394131665516 -0.7624448857959274, 0.1602580791640454 -0.7886454498244337))
11	110780000	114770000	11:110780000-114760000	316	0.0802442	-0.790428	-3.75062	0.0759385	3	0.251988	POLYGON ((0.09166001080586962 -0.8248317233534016, 0.05827030466638881 -0.8193532625436926, 0.05101297298725095 -0.8050150953275416, 0.05325542553512177 -0.7776670919264443, 0.07438227581849693 -0.7636814617596178, 0.101889904551861 -0.7688366581147301, 0.09600178332878662 -0.8204049244907463, 0.09166001080586962 -0.8248317233534016))
11	110780000	114770000	11:110780000-114760000	317	0.0895312	-0.740873	-3.75062	0.183556	3	0.184102	POLYGON ((0.0588446667269872 -0.6800704943509783, 0.07758494297883051 -0.6765879477940783, 0.0838663015387721 -0.6757332303097658, 0.09020090774974195 -0.6754908019935915, 0.09652921869852098 -0.6758629415804459, 0.09871825644592526 -0.6762066177112287, 0.1200900864039003 -0.7232091489738238, 0.1139394131665516 -0.7624448857959274, 0.101889904551861 -0.7688366581147301, 0.07438227581849693 -0.763…
11	110780000	114770000	11:110780000-114760000	318	0.0520506	-0.747838	-3.75062	0.147997	3	0.240201	POLYGON ((-0.01467984493803036 -0.7285288919518093, -0.0009287939706752527 -0.7095175857330306, 0.00294971640506024 -0.7046596146914184, 0.007272032431907133 -0.7001919184685431, 0.01199908622820039 -0.696154878986103, 0.0170881516311165 -0.6925849856122508, 0.02249323038330645 -0.6895145053471367, 0.02816546789483076 -0.6869711911729365, 0.03405359482247165 -0.684978031204489, 0.0401043904751438…
11	110780000	114770000	11:110780000-114760000	319	0.0245485	-0.785861	-3.75062	0.0608588	3	0.375368	POLYGON ((-0.04194725652556092 -0.7979239645126657, -0.04064768737483652 -0.7808874368172979, -0.03991860263910706 -0.7749396648324065, -0.0386480662085138 -0.7690836172476726, -0.0368467491677846 -0.7633684783119239, -0.03452978056501321 -0.7578422487989644, -0.0317166203445795 -0.752551342854771, -0.02843089590538552 -0.7475401981705879, -0.01467984493803036 -0.7285288919518093, 0.0532554255351…
11	110780000	114770000	11:110780000-114760000	320	0.0219494	-0.819934	-3.75062	0.0406192	3	0.391375	POLYGON ((-0.03844367795223196 -0.8511193467893633, -0.04213233330125761 -0.8329265328061888, -0.04305539411953049 -0.8269805772493911, -0.04342794325782806 -0.8209749435694875, -0.04324682567628532 -0.8149604922080336, -0.04194725652556092 -0.7979239645126657, 0.05101297298725095 -0.8050150953275416, 0.05827030466638881 -0.8193532625436926, 0.04824211495900266 -0.8335435053608589, -0.03844367795…
11	110780000	114770000	11:110780000-114760000	321	0.0293267	-0.856319	-3.75062	0.264235	3	0.173613	POLYGON ((0.03374282756483347 -0.9215565387595793, 0.03340953688463131 -0.9215773909833062, 0.02716504619841015 -0.9216692455656232, 0.02094027555085193 -0.92116493258751, 0.01479201168450935 -0.9200690527471891, 0.008776343393185684 -0.9183916034324978, 0.002948149840449086 -0.9161478875176736, -0.002639400086754236 -0.913358373759757, -0.007935332822138624 -0.910048510068171, -0.012891335136856…
11	110780000	114770000	11:110780000-114760000	322	0.0698489	-0.853784	-2.08223	0.00917982	4	-0.31421	POLYGON ((0.1018414109159206 -0.8563896447508808, 0.1006913010754666 -0.8585807057042131, 0.05160459885214383 -0.8872876315797011, 0.04824211495900266 -0.8335435053608589, 0.05827030466638881 -0.8193532625436926, 0.09166001080586962 -0.8248317233534016, 0.1018414109159206 -0.8563896447508808))
11	110780000	114770000	11:110780000-114760000	323	0.0897499	-0.887813	-3.75062	0.103198	3	0.272556	POLYGON ((0.1189492596144227 -0.9486083258364455, 0.1027457686254614 -0.9518944580948376, 0.09657509010035771 -0.9528417914996049, 0.09034219084066085 -0.9531963064618206, 0.08410389181630316 -0.9529547711172801, 0.07791706322308319 -0.9521193873742733, 0.0718381060369873 -0.9506977708403311, 0.06592243784605901 -0.9487028813960752, 0.0602239876471265 -0.9461529050490769, 0.05479470421297156 -0.9…
11	110780000	114770000	11:110780000-114760000	324	0.122157	-0.881241	-1.12198	0.0050199	4	-0.78438	POLYGON ((0.1309827372326971 -0.9461678888337656, 0.1189492596144227 -0.9486083258364455, 0.1006913010754666 -0.8585807057042131, 0.1018414109159206 -0.8563896447508808, 0.1397414738153968 -0.8598110792917366, 0.1623483099605982 -0.8907328303485618, 0.1309827372326971 -0.9461678888337656))
11	110780000	114770000	11:110780000-114760000	325	0.126279	-0.835578	-3.75062	0.100338	3	0.234029	POLYGON ((0.1553339659502548 -0.8160633799014446, 0.1397414738153968 -0.8598110792917366, 0.1018414109159206 -0.8563896447508808, 0.09166001080586962 -0.8248317233534016, 0.09600178332878662 -0.8204049244907463, 0.1534688499891722 -0.8089083228276025, 0.1553339659502548 -0.8160633799014446))
11	110780000	114770000	11:110780000-114760000	326	0.165496	-0.849556	-3.75062	0.0634587	3	0.233945	POLYGON ((0.2074504548627657 -0.8743556506560415, 0.1623483099605982 -0.8907328303485618, 0.1397414738153968 -0.8598110792917366, 0.1553339659502548 -0.8160633799014446, 0.2101048070167622 -0.8602488947518713, 0.2104877154383155 -0.8714159241244143, 0.2074504548627657 -0.8743556506560415))
11	110780000	114770000	11:110780000-114760000	327	0.190218	-0.818911	-3.75062	0.144077	3	0.183418	POLYGON ((0.2101048070167622 -0.8602488947518713, 0.1553339659502548 -0.8160633799014446, 0.1534688499891722 -0.8089083228276025, 0.1602580791640454 -0.7886454498244337, 0.1654380534930153 -0.7851858744605807, 0.227132120717386 -0.8164646208128781, 0.2278329854902905 -0.8193806901449768, 0.2101048070167622 -0.8602488947518713))
11	110780000	114770000	11:110780000-114760000	328	0.207288	-0.785242	-1.02788	0.00357993	4	-0.79879	POLYGON ((0.1654380534930153 -0.7851858744605807, 0.1851966679542154 -0.7501971152523267, 0.2388701917699443 -0.778456625373164, 0.227132120717386 -0.8164646208128781, 0.1654380534930153 -0.7851858744605807))
11	110780000	114770000	11:110780000-114760000	329	0.226592	-0.748579	-1.2406	0.0048799	4	-0.691647	POLYGON ((0.2388701917699443 -0.778456625373164, 0.1851966679542154 -0.7501971152523267, 0.1850984374505147 -0.7400060044564678, 0.1906082814358966 -0.7290568892540784, 0.2164846377725798 -0.7101312656997956, 0.2651297955016665 -0.7527168263313869, 0.2671240750719859 -0.7601470221643044, 0.2388701917699443 -0.778456625373164))
11	110780000	114770000	11:110780000-114760000	330	0.255931	-0.715065	-3.75062	0.123738	3	0.206239	POLYGON ((0.2164846377725798 -0.7101312656997956, 0.2225607967314819 -0.6932056935534399, 0.2532601687864077 -0.6670231660821906, 0.280108349730415 -0.6596500201680653, 0.2905669839588976 -0.6830057324152216, 0.2651297955016665 -0.7527168263313869, 0.2164846377725798 -0.7101312656997956))
11	110780000	114770000	11:110780000-114760000	331	0.296416	-0.729838	-3.75062	0.0949981	3	0.223384	POLYGON ((0.3180932269646189 -0.7851182180482267, 0.2671240750719859 -0.7601470221643044, 0.2651297955016665 -0.7527168263313869, 0.2905669839588976 -0.6830057324152216, 0.3089399317564445 -0.6977312250323706, 0.3269712697546546 -0.7666165733873616, 0.3180932269646189 -0.7851182180482267))
11	110780000	114770000	11:110780000-114760000	332	0.335588	-0.719584	-3.75062	0.141717	3	0.192482	POLYGON ((0.3691843203281991 -0.7320466488551539, 0.3269712697546546 -0.7666165733873616, 0.3089399317564445 -0.6977312250323706, 0.3649488390981482 -0.7004052886576249, 0.372409092643004 -0.7217005914057837, 0.3691843203281991 -0.7320466488551539))
11	110780000	114770000	11:110780000-114760000	333	0.337549	-0.678517	-3.75062	0.144897	3	0.192482	POLYGON ((0.2905669839588976 -0.6830057324152216, 0.280108349730415 -0.6596500201680653, 0.2957566891115421 -0.6288714157181375, 0.3261984374448514 -0.6378622951755807, 0.3702987708932784 -0.6824361596658984, 0.3649488390981482 -0.7004052886576249, 0.3089399317564445 -0.6977312250323706, 0.2905669839588976 -0.6830057324152216))
11	110780000	114770000	11:110780000-114760000	334	0.366729	-0.649646	-3.75062	0.169897	3	0.180197	POLYGON ((0.4047622398314052 -0.6583591802549766, 0.3702987708932784 -0.6824361596658984, 0.3261984374448514 -0.6378622951755807, 0.394467557895779 -0.6225517522271943, 0.4047622398314052 -0.6583591802549766))
11	110780000	114770000	11:110780000-114760000	335	0.357815	-0.609898	-0.686329	0.0302594	4	-0.827123	POLYGON ((0.3261984374448514 -0.6378622951755807, 0.2957566891115421 -0.6288714157181375, 0.2946007707713475 -0.6187338271948633, 0.3043805460780782 -0.5740747305052328, 0.3877993497092681 -0.596147236155015, 0.3981516696013673 -0.609398128369764, 0.394467557895779 -0.6225517522271943, 0.3261984374448514 -0.6378622951755807))
11	110780000	114770000	11:110780000-114760000	336	0.36854	-0.569366	-3.75062	0.124798	3	0.297628	POLYGON ((0.3144159246437007 -0.5327218807217571, 0.3144206334785797 -0.5328059470785832, 0.3161267505466335 -0.5302746285002278, 0.3200949765958578 -0.5254529382098302, 0.3245050743881722 -0.5210317898639272, 0.3293168186987048 -0.5170515094813015, 0.3344863208188525 -0.5135484018517752, 0.3399664288723868 -0.5105544193942705, 0.3457071578954458 -0.5080968707135595, 0.3516561457575834 -0.5061981…
11	110780000	114770000	11:110780000-114760000	337	0.408397	-0.570381	-3.75062	0.454931	2	-0.0258978	POLYGON ((0.3901320438505014 -0.5045092587018303, 0.4100605576814424 -0.5050165497698885, 0.4160073131508675 -0.5054398113368471, 0.4218907966111454 -0.5064029693404152, 0.4276620950016096 -0.5078980164485116, 0.4332732279259175 -0.5099125234038109, 0.4386775465429552 -0.512429742355897, 0.4438301213876936 -0.51542874609657, 0.4486881158978017 -0.5188846020407553, 0.4641088294811401 -0.5309499696…
11	110780000	114770000	11:110780000-114760000	338	0.439238	-0.594512	-3.75062	0.118878	2	-0.247398	POLYGON ((0.4641088294811401 -0.5309499696505311, 0.4795295430644786 -0.5430153372603069, 0.4837795054084303 -0.5466954746806312, 0.4864159198818652 -0.590504153282745, 0.4788579495510394 -0.6075735506889408, 0.4607360184376121 -0.6173736400129832, 0.4047911434417139 -0.6067637431238933, 0.4641088294811401 -0.5309499696505311))
11	110780000	114770000	11:110780000-114760000	339	0.43236	-0.630777	-3.75062	0.274235	3	0.109838	POLYGON ((0.4415212662409735 -0.6575256515703823, 0.4128685194240147 -0.6623335028275704, 0.4047622398314052 -0.6583591802549766, 0.394467557895779 -0.6225517522271943, 0.3981516696013673 -0.609398128369764, 0.4047911434417139 -0.6067637431238933, 0.4607360184376121 -0.6173736400129832, 0.4415212662409735 -0.6575256515703823))
11	110780000	114770000	11:110780000-114760000	340	0.468099	-0.64788	-1.49922	0.208956	4	-0.226839	POLYGON ((0.4913121183582857 -0.6923293281987214, 0.4415212662409735 -0.6575256515703823, 0.4607360184376121 -0.6173736400129832, 0.4788579495510394 -0.6075735506889408, 0.5085822443043884 -0.6783974662229434, 0.5064869729992654 -0.6837910009635028, 0.4914940774679547 -0.6923095129298124, 0.4913121183582857 -0.6923293281987214))
11	110780000	114770000	11:110780000-114760000	341	0.441593	-0.685799	-3.75062	0.274855	3	0.103515	POLYGON ((0.4410317092679442 -0.7258446947228291, 0.4275222966133406 -0.7166027743503894, 0.4128685194240147 -0.6623335028275704, 0.4415212662409735 -0.6575256515703823, 0.4913121183582857 -0.6923293281987214, 0.4410317092679442 -0.7258446947228291))
11	110780000	114770000	11:110780000-114760000	342	0.399859	-0.697068	-0.64379	0.0812384	4	-0.552903	POLYGON ((0.4275222966133406 -0.7166027743503894, 0.372409092643004 -0.7217005914057837, 0.3649488390981482 -0.7004052886576249, 0.3702987708932784 -0.6824361596658984, 0.4047622398314052 -0.6583591802549766, 0.4128685194240147 -0.6623335028275704, 0.4275222966133406 -0.7166027743503894))
11	110780000	114770000	11:110780000-114760000	343	0.403912	-0.74088	-3.75062	0.0321194	3	0.311501	POLYGON ((0.4355539680852401 -0.7805286268944985, 0.409786561933891 -0.7765803222198036, 0.3691843203281991 -0.7320466488551539, 0.372409092643004 -0.7217005914057837, 0.4275222966133406 -0.7166027743503894, 0.4410317092679442 -0.7258446947228291, 0.4411204241401595 -0.7709081911933934, 0.4355539680852401 -0.7805286268944985))
11	110780000	114770000	11:110780000-114760000	344	0.37478	-0.76744	-3.75062	0.00309994	3	0.410688	POLYGON ((0.3209294636265903 -0.7944810846104142, 0.3180932269646189 -0.7851182180482267, 0.3269712697546546 -0.7666165733873616, 0.3691843203281991 -0.7320466488551539, 0.409786561933891 -0.7765803222198036, 0.3559107581403221 -0.8009059554326468, 0.3222046433785869 -0.7962160546849441, 0.3209294636265903 -0.7944810846104142))
11	110780000	114770000	11:110780000-114760000	345	0.393492	-0.808884	-3.75062	0.00443991	3	0.405233	POLYGON ((0.3559107581403221 -0.8009059554326468, 0.409786561933891 -0.7765803222198036, 0.4355539680852401 -0.7805286268944985, 0.4384933449270327 -0.79363314587388, 0.4263809910585309 -0.8500611521637447, 0.4098774298365131 -0.8533973265076168, 0.3559107581403221 -0.8009059554326468))
11	110780000	114770000	11:110780000-114760000	346	0.364927	-0.838251	-3.75062	0.000219996	3	0.503421	POLYGON ((0.3559107581403221 -0.8009059554326468, 0.4098774298365131 -0.8533973265076168, 0.4028600863408428 -0.8586878219057276, 0.3598186557123597 -0.8653120193115068, 0.3221122618732176 -0.8139189572024813, 0.3222046433785869 -0.7962160546849441, 0.3559107581403221 -0.8009059554326468))
11	110780000	114770000	11:110780000-114760000	347	0.332472	-0.862063	-3.75062	1.99996e-05	3	0.503421	POLYGON ((0.303991237073573 -0.8538267326738915, 0.3221122618732176 -0.8139189572024813, 0.3598186557123597 -0.8653120193115068, 0.3426365876235354 -0.8905057756286152, 0.3255394342529099 -0.8930881450837852, 0.303991237073573 -0.8538267326738915))
11	110780000	114770000	11:110780000-114760000	348	0.295644	-0.882276	-3.75062	0.000379992	3	0.503421	POLYGON ((0.2826200004314905 -0.9238125884920521, 0.2742423136268087 -0.8650055776353175, 0.2743378473134109 -0.8648939635871763, 0.303991237073573 -0.8538267326738915, 0.3255394342529099 -0.8930881450837852, 0.2979058866310748 -0.9259568127380409, 0.2826200004314905 -0.9238125884920521))
11	110780000	114770000	11:110780000-114760000	349	0.253876	-0.846525	-3.75062	0.0307594	3	0.281122	POLYGON ((0.2104877154383155 -0.8714159241244143, 0.2101048070167622 -0.8602488947518713, 0.2278329854902905 -0.8193806901449768, 0.2603979107466521 -0.8246673722767902, 0.2743378473134109 -0.8648939635871763, 0.2742423136268087 -0.8650055776353175, 0.2122990770988173 -0.8720064786137921, 0.2104877154383155 -0.8714159241244143))
11	110780000	114770000	11:110780000-114760000	350	0.261126	-0.801869	-3.75062	0.0219996	3	0.327709	POLYGON ((0.227132120717386 -0.8164646208128781, 0.2388701917699443 -0.778456625373164, 0.2671240750719859 -0.7601470221643044, 0.3180932269646189 -0.7851182180482267, 0.3209294636265903 -0.7944810846104142, 0.2603979107466521 -0.8246673722767902, 0.2278329854902905 -0.8193806901449768, 0.227132120717386 -0.8164646208128781))
11	110780000	114770000	11:110780000-114760000	351	0.279046	-0.837803	-3.75062	0.0101198	3	0.347233	POLYGON ((0.2743378473134109 -0.8648939635871763, 0.2603979107466521 -0.8246673722767902, 0.3209294636265903 -0.7944810846104142, 0.3222046433785869 -0.7962160546849441, 0.3221122618732176 -0.8139189572024813, 0.303991237073573 -0.8538267326738915, 0.2743378473134109 -0.8648939635871763))
11	110780000	114770000	11:110780000-114760000	352	0.258515	-0.887565	-3.75062	0.00821984	3	0.352099	POLYGON ((0.2826200004314905 -0.9238125884920521, 0.2733038731752387 -0.9267556299809343, 0.2703076691603976 -0.9263119798737537, 0.2122990770988173 -0.8720064786137921, 0.2742423136268087 -0.8650055776353175, 0.2826200004314905 -0.9238125884920521))
11	110780000	114770000	11:110780000-114760000	353	0.230868	-0.917097	-3.75062	0.00379992	3	0.415154	POLYGON ((0.2121375344783591 -0.9324894450377729, 0.2074504548627657 -0.8743556506560415, 0.2104877154383155 -0.8714159241244143, 0.2122990770988173 -0.8720064786137921, 0.2703076691603976 -0.9263119798737537, 0.2273178852041326 -0.9432787991783704, 0.2121375344783591 -0.9324894450377729))
11	110780000	114770000	11:110780000-114760000	354	0.191183	-0.920297	-3.75062	0.0248795	3	0.338517	POLYGON ((0.1359481435781177 -0.9599095469912707, 0.1310012523624057 -0.9461641338920036, 0.1309827372326971 -0.9461678888337656, 0.1623483099605982 -0.8907328303485618, 0.2074504548627657 -0.8743556506560415, 0.2121375344783591 -0.9324894450377729, 0.1359481435781177 -0.9599095469912707))
11	110780000	114770000	11:110780000-114760000	355	0.203759	-0.955239	-3.75062	0.0397392	3	0.362193	POLYGON ((0.1892554977200667 -1.018987499871169, 0.1892460577272813 -1.018950231283465, 0.1837801003820793 -1.017497977423435, 0.1775657266887783 -1.015149374137331, 0.1716217458733678 -1.012182309955092, 0.166009518593432 -1.008627414351304, 0.1607869807621412 -1.004521385077635, 0.1560080454666229 -0.9999066093261235, 0.1517220464146047 -0.9948307261594629, 0.147973228654717 -0.989346134725396,…
11	110780000	114770000	11:110780000-114760000	356	0.247792	-0.959979	-3.75062	1.99996e-05	3	0.503421	POLYGON ((0.2230774749955682 -0.9826754773722467, 0.2273178852041326 -0.9432787991783704, 0.2703076691603976 -0.9263119798737537, 0.2733038731752387 -0.9267556299809343, 0.2626745453252233 -0.9786958404673531, 0.2230774749955682 -0.9826754773722467))
11	110780000	114770000	11:110780000-114760000	357	0.251815	-1	-3.75062	0.0455991	3	0.503421	POLYGON ((0.2967988052528002 -1.047532331100093, 0.2966581626396736 -1.047479275104262, 0.2938741924850851 -1.050062663973948, 0.288741304869373 -1.053960151609281, 0.2832496518684225 -1.057333383362401, 0.2774525882505757 -1.060149586223301, 0.2714064360351484 -1.062381399058417, 0.2651699372895581 -1.064007138440777, 0.2588036834142047 -1.06501100931776, 0.2523695264599494 -1.065383258469691, 0…
11	110780000	114770000	11:110780000-114760000	358	0.283713	-0.96733	-3.75062	0.000759985	3	0.503421	POLYGON ((0.2866582232866408 -1.002113018858071, 0.2626745453252233 -0.9786958404673531, 0.2733038731752387 -0.9267556299809343, 0.2826200004314905 -0.9238125884920521, 0.2979058866310748 -0.9259568127380409, 0.315748663321002 -0.947993840240088, 0.2866582232866408 -1.002113018858071))
11	110780000	114770000	11:110780000-114760000	359	0.317294	-0.985381	-3.75062	1.99996e-05	3	0.503421	POLYGON ((0.3120338357085266 -1.053279591438705, 0.2967988052528002 -1.047532331100093, 0.2866582232866408 -1.002113018858071, 0.315748663321002 -0.947993840240088, 0.3270927451571858 -0.9522075601312918, 0.3415542175000919 -0.9750259733386842, 0.3120338357085266 -1.053279591438705))
11	110780000	114770000	11:110780000-114760000	360	0.35293	-0.998824	-3.75062	0.0455991	3	0.503421	POLYGON ((0.4108230137048646 -1.029184830120053, 0.4106843467644715 -1.029479483563853, 0.4074714768364383 -1.034887108296656, 0.4037538644788666 -1.039960992093523, 0.3995659137912629 -1.044654179439398, 0.3949463815503765 -1.048923237918817, 0.389938018541282 -1.05272866015484, 0.384587173926494 -1.056035229424291, 0.3789433663144269 -1.058812345565769, 0.3730588254966791 -1.061034308164361, 0.…
11	110780000	114770000	11:110780000-114760000	361	0.361274	-0.957508	-3.75062	1.99996e-05	3	0.503421	POLYGON ((0.3762490137380906 -0.9255806828818323, 0.396118361906907 -0.9736635551563525, 0.3943682918374062 -0.9856917243730511, 0.3415542175000919 -0.9750259733386842, 0.3270927451571858 -0.9522075601312918, 0.3762490137380906 -0.9255806828818323))
11	110780000	114770000	11:110780000-114760000	362	0.341326	-0.920682	-3.75062	1.99996e-05	3	0.503421	POLYGON ((0.315748663321002 -0.947993840240088, 0.2979058866310748 -0.9259568127380409, 0.3255394342529099 -0.8930881450837852, 0.3426365876235354 -0.8905057756286152, 0.3764530865440822 -0.924760760009377, 0.3762490137380906 -0.9255806828818323, 0.3270927451571858 -0.9522075601312918, 0.315748663321002 -0.947993840240088))
11	110780000	114770000	11:110780000-114760000	363	0.372827	-0.889584	-3.75062	1.99996e-05	3	0.503421	POLYGON ((0.3861049455213216 -0.9174139232521845, 0.3764530865440822 -0.924760760009377, 0.3426365876235354 -0.8905057756286152, 0.3598186557123597 -0.8653120193115068, 0.4028600863408428 -0.8586878219057276, 0.3861049455213216 -0.9174139232521845))
11	110780000	114770000	11:110780000-114760000	364	0.412069	-0.90078	-3.75062	0.00139997	3	0.433923	POLYGON ((0.4363087894495433 -0.9210589242408109, 0.3861049455213216 -0.9174139232521845, 0.4028600863408428 -0.8586878219057276, 0.4098774298365131 -0.8533973265076168, 0.4263809910585309 -0.8500611521637447, 0.4345725080991516 -0.8567662159730719, 0.4410546226802387 -0.8692207323273242, 0.4363087894495433 -0.9210589242408109))
11	110780000	114770000	11:110780000-114760000	365	0.409394	-0.937623	-3.75062	0.00141997	3	0.433923	POLYGON ((0.396118361906907 -0.9736635551563525, 0.3762490137380906 -0.9255806828818323, 0.3764530865440822 -0.924760760009377, 0.3861049455213216 -0.9174139232521845, 0.4363087894495433 -0.9210589242408109, 0.4412783018875057 -0.9294850218813123, 0.4395567761353331 -0.9384265671540816, 0.396118361906907 -0.9736635551563525))
11	110780000	114770000	11:110780000-114760000	366	0.434122	-0.968107	-3.75062	0.0257395	3	0.385274	POLYGON ((0.48336413301416 -1.015303067855444, 0.4664939844629432 -1.024916364655371, 0.4606299779285933 -1.027878063134208, 0.4544983743134901 -1.030236381946774, 0.4481610711448911 -1.031967514253594, 0.4416820424531223 -1.033053984559531, 0.4351266929642921 -1.033484825126032, 0.4285611978503686 -1.033255686688631, 0.4220518347017316 -1.032368882362066, 0.4156643144658291 -1.030833364289757, 0…
11	110780000	114770000	11:110780000-114760000	367	0.467862	-0.94888	-3.75062	0.0585988	3	0.355737	POLYGON ((0.5283656037522927 -0.9736406479701104, 0.525857305052554 -0.9790766708735638, 0.5227148405297469 -0.9844674160530911, 0.519072827523937 -0.9895340676232317, 0.5149644340659382 -0.994230483284347, 0.5104270755413058 -0.9985138924974207, 0.5055020739461777 -1.002345285997922, 0.5002342815653769 -1.005689771055517, 0.48336413301416 -1.015303067855444, 0.4395567761353331 -0.938426567154081…
11	110780000	114770000	11:110780000-114760000	368	0.463828	-0.905519	-3.75062	0.00329993	3	0.424656	POLYGON ((0.4851488261806921 -0.9254039713247868, 0.4412783018875057 -0.9294850218813123, 0.4363087894495433 -0.9210589242408109, 0.4410546226802387 -0.8692207323273242, 0.4889619509716744 -0.8917330981364189, 0.4851488261806921 -0.9254039713247868))
11	110780000	114770000	11:110780000-114760000	369	0.510376	-0.91079	-1.55157	1.99996e-05	4	-0.678057	POLYGON ((0.5759672422151243 -0.9154502777278618, 0.5747384005175367 -0.9223138141048571, 0.5732588019363851 -0.9287085769887551, 0.571145532245533 -0.9349227781052584, 0.5684198869742356 -0.9408937966245463, 0.5651093325925166 -0.9465614622805554, 0.5612472297301112 -0.9518686617098989, 0.5568724969996557 -0.9567619139862185, 0.5520292188117909 -0.9611919095502768, 0.5467662011342493 -0.96511400…
11	110780000	114770000	11:110780000-114760000	370	0.518135	-0.867454	-3.75062	0.117718	3	0.240017	POLYGON ((0.5146844692045465 -0.8261846737235152, 0.5579789963348236 -0.8734850392360876, 0.563214966490481 -0.8978876073960037, 0.4985110452483232 -0.8863030725363519, 0.5039300681554862 -0.837826097783101, 0.5146844692045465 -0.8261846737235152))
11	110780000	114770000	11:110780000-114760000	371	0.483533	-0.863586	-3.75062	0.0202196	3	0.359541	POLYGON ((0.5039300681554862 -0.837826097783101, 0.4985110452483232 -0.8863030725363519, 0.4889619509716744 -0.8917330981364189, 0.4410546226802387 -0.8692207323273242, 0.4345725080991516 -0.8567662159730719, 0.5039300681554862 -0.837826097783101))
11	110780000	114770000	11:110780000-114760000	372	0.473272	-0.826009	-3.75062	0.0224396	3	0.317489	POLYGON ((0.4263809910585309 -0.8500611521637447, 0.4384933449270327 -0.79363314587388, 0.5102061643625933 -0.8172019418175903, 0.5147547788191619 -0.8253879902804775, 0.5146844692045465 -0.8261846737235152, 0.5039300681554862 -0.837826097783101, 0.4345725080991516 -0.8567662159730719, 0.4263809910585309 -0.8500611521637447))
11	110780000	114770000	11:110780000-114760000	373	0.485697	-0.788202	-3.75062	0.0249795	3	0.300723	POLYGON ((0.4384933449270327 -0.79363314587388, 0.4355539680852401 -0.7805286268944985, 0.4411204241401595 -0.7709081911933934, 0.5012674973915744 -0.761421447969639, 0.5123881500396522 -0.7681266390981774, 0.5102061643625933 -0.8172019418175903, 0.4384933449270327 -0.79363314587388))
11	110780000	114770000	11:110780000-114760000	374	0.478211	-0.740734	-3.75062	0.320734	3	0.0794627	POLYGON ((0.4411204241401595 -0.7709081911933934, 0.4410317092679442 -0.7258446947228291, 0.4913121183582857 -0.6923293281987214, 0.4914940774679547 -0.6923095129298124, 0.5012674973915744 -0.761421447969639, 0.4411204241401595 -0.7709081911933934))
11	110780000	114770000	11:110780000-114760000	375	0.517684	-0.735152	-3.75062	0.321194	3	0.0794627	POLYGON ((0.5064869729992654 -0.6837910009635028, 0.5499372312365866 -0.7183968461598301, 0.5239964969583859 -0.7640345575168052, 0.5123881500396522 -0.7681266390981774, 0.5012674973915744 -0.761421447969639, 0.4914940774679547 -0.6923095129298124, 0.5064869729992654 -0.6837910009635028))
11	110780000	114770000	11:110780000-114760000	376	0.552043	-0.754681	-1.61662	0.0119598	4	-0.465274	POLYGON ((0.5911475460923465 -0.76683072068987, 0.5724166594013168 -0.7841149596437235, 0.5239964969583859 -0.7640345575168052, 0.5499372312365866 -0.7183968461598301, 0.55941660034431 -0.7193263586525444, 0.5867506808530926 -0.7466009343425948, 0.5911475460923465 -0.76683072068987))
11	110780000	114770000	11:110780000-114760000	377	0.537192	-0.790491	-2.20047	0.0051999	4	-0.275836	POLYGON ((0.5675810545132687 -0.8027921093327612, 0.5147547788191619 -0.8253879902804775, 0.5102061643625933 -0.8172019418175903, 0.5123881500396522 -0.7681266390981774, 0.5239964969583859 -0.7640345575168052, 0.5724166594013168 -0.7841149596437235, 0.5675810545132687 -0.8027921093327612))
11	110780000	114770000	11:110780000-114760000	378	0.555488	-0.833264	-3.75062	0.0620588	3	0.277646	POLYGON ((0.5675810545132687 -0.8027921093327612, 0.5816899056901645 -0.8265731286535893, 0.5579789963348236 -0.8734850392360876, 0.5146844692045465 -0.8261846737235152, 0.5147547788191619 -0.8253879902804775, 0.5675810545132687 -0.8027921093327612))
11	110780000	114770000	11:110780000-114760000	379	0.591841	-0.851639	-3.75062	0.447771	3	0.0518707	POLYGON ((0.659541651440942 -0.8450833271394707, 0.6561403013655075 -0.8635085337781807, 0.6546758924880131 -0.8697237525629721, 0.6526122267395789 -0.8757664937937419, 0.6499689853524135 -0.8815791276952091, 0.6467713769861866 -0.8871062190314856, 0.6430498973124064 -0.8922950557933184, 0.6388400381764332 -0.8970961519138486, 0.6341819491108563 -0.9014637192184772, 0.6291200544283907 -0.90535610…
11	110780000	114770000	11:110780000-114760000	380	0.600121	-0.806784	-3.75062	0.0576388	3	0.323478	POLYGON ((0.5816899056901645 -0.8265731286535893, 0.5675810545132687 -0.8027921093327612, 0.5724166594013168 -0.7841149596437235, 0.5911475460923465 -0.76683072068987, 0.5952970492303181 -0.7681612562189616, 0.6489464704741844 -0.8389888983210501, 0.5816899056901645 -0.8265731286535893))
11	110780000	114770000	11:110780000-114760000	381	0.631169	-0.783266	-3.75062	0.233255	3	0.220653	POLYGON ((0.690323689556519 -0.7475389090544894, 0.6950677400159113 -0.7693992323774655, 0.6960925668616283 -0.7755026116761785, 0.6965357587092657 -0.781675543711593, 0.6963933450767026 -0.7878627262113194, 0.6956666018240092 -0.7940087292354256, 0.6943620397232284 -0.8000584917640599, 0.6924913461294504 -0.8059578149799769, 0.6900712802757413 -0.811653847826737, 0.6871235231299579 -0.8170955604…
11	110780000	114770000	11:110780000-114760000	382	0.621681	-0.739546	-3.75062	0.48683	3	0.0181191	POLYGON ((0.6606202705340378 -0.6850767633443666, 0.6606077448315644 -0.6857920333751816, 0.6685417438183526 -0.6939452704906127, 0.6725744249406197 -0.6984946381681262, 0.6761671419989156 -0.7033988860654211, 0.6792888363900762 -0.708615617554322, 0.6819125214447586 -0.7140997346239084, 0.6840155157239238 -0.7198038277473497, 0.6855796390971267 -0.7256785857315133, 0.690323689556519 -0.747538909…
11	110780000	114770000	11:110780000-114760000	383	0.594755	-0.711875	-3.75062	0.310374	3	0.107384	POLYGON ((0.6433318622036435 -0.6915412041825438, 0.5867506808530926 -0.7466009343425948, 0.55941660034431 -0.7193263586525444, 0.5825760434890093 -0.6904772573149751, 0.6433318622036435 -0.6915412041825438))
11	110780000	114770000	11:110780000-114760000	384	0.595497	-0.669519	-3.75062	0.0135397	2	-0.492468	POLYGON ((0.6527447742771088 -0.6351333317287907, 0.6513023510500748 -0.6355412619329424, 0.6538100274858792 -0.6399402541262726, 0.6564096858176596 -0.6457502813506283, 0.6584321063969572 -0.6517855489329466, 0.6598581237722352 -0.6579888637109628, 0.6606742243018822 -0.6643014400245814, 0.6608726742161226 -0.6706634567976877, 0.6606202705340378 -0.6850767633443666, 0.6433318622036435 -0.6915412…
11	110780000	114770000	11:110780000-114760000	385	0.559051	-0.683213	-3.75062	0.47797	2	-0.00815606	POLYGON ((0.5825760434890093 -0.6904772573149751, 0.55941660034431 -0.7193263586525444, 0.5499372312365866 -0.7183968461598301, 0.5064869729992654 -0.6837910009635028, 0.5085822443043884 -0.6783974662229434, 0.5186405346331644 -0.6703830979619989, 0.5713079186344699 -0.6604871348239134, 0.5825760434890093 -0.6904772573149751))
11	110780000	114770000	11:110780000-114760000	386	0.551638	-0.643761	-1.15513	0.437691	1	0.0386663	POLYGON ((0.5607562104128377 -0.6104035674284788, 0.5931836579719777 -0.623238247135006, 0.5713079186344699 -0.6604871348239134, 0.5186405346331644 -0.6703830979619989, 0.5416801244365305 -0.6166206189082629, 0.5607562104128377 -0.6104035674284788))
11	110780000	114770000	11:110780000-114760000	387	0.51516	-0.628128	-1.18466	0.434431	1	0.0395156	POLYGON ((0.4864159198818652 -0.590504153282745, 0.5416801244365305 -0.6166206189082629, 0.5186405346331644 -0.6703830979619989, 0.5085822443043884 -0.6783974662229434, 0.4788579495510394 -0.6075735506889408, 0.4864159198818652 -0.590504153282745))
11	110780000	114770000	11:110780000-114760000	388	0.533734	-0.588825	-3.75062	0.0824184	2	-0.34121	POLYGON ((0.4837795054084303 -0.5466954746806312, 0.4838159132091345 -0.5467270010093183, 0.4858729328983145 -0.5442759924568649, 0.4906923478466455 -0.5396039563430518, 0.4959653523892552 -0.5354506317727122, 0.5016363773867308 -0.5318597882268339, 0.5076456591927201 -0.5288692675248196, 0.5139298694683697 -0.5265105850314795, 0.5204227825629932 -0.5248085975348641, 0.5420242730232649 -0.5203169…
11	110780000	114770000	11:110780000-114760000	389	0.576937	-0.579842	-0.564861	0.121698	1	0.703969	POLYGON ((0.5420242730232649 -0.520316945414101, 0.5636257634835365 -0.5158252932933379, 0.5712400934538273 -0.5147046724915555, 0.5937143256504516 -0.512739120545505, 0.6031971075870286 -0.6211657859108283, 0.5931836579719777 -0.623238247135006, 0.5607562104128377 -0.6104035674284788, 0.5420242730232649 -0.520316945414101))
11	110780000	114770000	11:110780000-114760000	390	0.621885	-0.575911	-0.200447	0.0136397	1	1.7438	POLYGON ((0.5937143256504516 -0.512739120545505, 0.6100352464749964 -0.511311725055089, 0.6256590584841876 -0.506893171122314, 0.6612465448719934 -0.6327289548791792, 0.6527447742771088 -0.6351333317287907, 0.6031971075870286 -0.6211657859108283, 0.5937143256504516 -0.512739120545505))
11	110780000	114770000	11:110780000-114760000	391	0.66502	-0.563712	-0.598522	0.00779984	1	1.93414	POLYGON ((0.6256590584841876 -0.506893171122314, 0.6472265512183975 -0.50079369106042, 0.6536934344570721 -0.4993145282016105, 0.6602769131746558 -0.4984982503318537, 0.6669092189113107 -0.4983532599836716, 0.6735220805957345 -0.4988810496465229, 0.6800474273081749 -0.5000761864035403, 0.6864180889831426 -0.5019263678564339, 0.7098363686271362 -0.5100367149088195, 0.6670407794854517 -0.6336071450…
11	110780000	114770000	11:110780000-114760000	392	0.711857	-0.579932	-0.544281	0.0219196	1	1.6764	POLYGON ((0.7098363686271362 -0.5100367149088195, 0.7332546482711297 -0.5181470619612052, 0.7396219948891001 -0.5207345123050631, 0.745682561532963 -0.5239760449966465, 0.7513693843625047 -0.5278358439992776, 0.7720262749463704 -0.5435030591018217, 0.6930012136219361 -0.6476959251905146, 0.6806311115718107 -0.6383138234229276, 0.6670407794854517 -0.6336071450736572, 0.7098363686271362 -0.51003671…
11	110780000	114770000	11:110780000-114760000	393	0.753171	-0.611267	-1.39382	0.000439991	1	1.5077	POLYGON ((0.7720262749463704 -0.5435030591018217, 0.7926831655302362 -0.5591702742043658, 0.7976970699961613 -0.5633848214247803, 0.8022641597324185 -0.5680798547161959, 0.8063386048188714 -0.5732082602680225, 0.8098795189354138 -0.5787185754573558, 0.8128513696488019 -0.5845555052670984, 0.8186883377196099 -0.5975970203437159, 0.818752391142937 -0.5975391674773499, 0.8171503532698887 -0.60524990…
11	110780000	114770000	11:110780000-114760000	394	0.775359	-0.660843	-1.68301	0.000159997	1	1.18769	POLYGON ((0.7190949869669068 -0.7041499541546846, 0.7134668730033676 -0.6826123821810821, 0.7045842728096571 -0.6627660230883886, 0.8113485330739212 -0.6149817300361754, 0.8078486214373578 -0.6809572019684016, 0.7190949869669068 -0.7041499541546846))
11	110780000	114770000	11:110780000-114760000	395	0.789353	-0.714395	-0.997473	0.0222396	1	1.18935	POLYGON ((0.750454618406235 -0.7719211229690497, 0.7366233811159193 -0.7530576696989638, 0.7332181266101999 -0.747922501067414, 0.7303113685960166 -0.7424895945736341, 0.727928919929511 -0.7368071960065991, 0.726091937447404 -0.7309257667174206, 0.7190949869669068 -0.7041499541546846, 0.8078486214373578 -0.6809572019684016, 0.8145828207408234 -0.6880858706532718, 0.8143262805996325 -0.72508854659…
11	110780000	114770000	11:110780000-114760000	396	0.817016	-0.752121	-0.958119	0.0119598	1	1.6838	POLYGON ((0.8842970789007646 -0.7670740734158176, 0.8730823791624509 -0.7857638828058915, 0.8695051931787978 -0.7911104058909161, 0.8654199478260011 -0.7960795445554935, 0.8608661852916424 -0.8006232011711519, 0.8558879826670067 -0.8046973964645094, 0.850533525313071 -0.8082626952044789, 0.8448546404614462 -0.8112845879064675, 0.8389062955646758 -0.8137338248589512, 0.8327460662514912 -0.81558669…
11	110780000	114770000	11:110780000-114760000	397	0.839445	-0.714742	-1.03061	0.00327993	1	1.73452	POLYGON ((0.9059384501055785 -0.6969352607337019, 0.9047271106035574 -0.7184221645599903, 0.9040655268748936 -0.7247161145813044, 0.9027985690505385 -0.7309166240581244, 0.9009381061963742 -0.736965605614478, 0.8985015674294269 -0.7428063914124674, 0.8955117786390783 -0.7483842640257437, 0.8842970789007646 -0.7670740734158176, 0.8143262805996325 -0.7250885465963703, 0.8145828207408234 -0.68808587…
11	110780000	114770000	11:110780000-114760000	398	0.842284	-0.664393	-1.21285	0.00137997	1	1.54278	POLYGON ((0.8961192588090502 -0.6926825454038379, 0.8145828207408234 -0.6880858706532718, 0.8078486214373578 -0.6809572019684016, 0.8113485330739212 -0.6149817300361754, 0.8171503532698887 -0.6052499071630099, 0.8961192588090502 -0.6926825454038379))
11	110780000	114770000	11:110780000-114760000	399	0.873438	-0.636254	-0.73365	0.0159597	1	1.76932	POLYGON ((0.818752391142937 -0.5975391674773499, 0.8296119623764725 -0.5877308342028267, 0.8345791356105964 -0.5836687585873028, 0.8399205435835673 -0.5801131110920763, 0.8455847456166953 -0.5770981345462408, 0.8515171923480332 -0.5746528648220864, 0.8576607510725532 -0.5728008512037773, 0.8639562559613273 -0.5715599295948713, 0.8703430778608037 -0.570942050748819, 0.8767597081846981 -0.570953165…

## Sheet: ED_Fig_3b
Dpar	gene	region	LMI_quadrant	LMI_pval	LMIs	log_LMI_pval
0	Sox9	11:110780000-114760000	1	0.0194396	1.1935	-1.71131
3	Sox9	11:110780000-114760000	1	0.0218396	1.16211	-1.66076
4	Sox9	11:110780000-114760000	1	0.0222796	1.16211	-1.65209
5	Sox9	11:110780000-114760000	1	0.0216196	1.16211	-1.66515
6	Sox9	11:110780000-114760000	1	0.0213396	1.16211	-1.67081
7	Sox9	11:110780000-114760000	1	0.0208996	1.16211	-1.67986
8	Sox9	11:110780000-114760000	1	0.0218996	1.16211	-1.65956
9	Sox9	11:110780000-114760000	1	0.0375792	0.983638	-1.42505
10	Sox9	11:110780000-114760000	1	0.0361593	0.983638	-1.44178
11	Sox9	11:110780000-114760000	1	0.0210396	1.16211	-1.67696
12	Sox9	11:110780000-114760000	1	0.0198596	1.16211	-1.70203
13	Sox9	11:110780000-114760000	1	0.0205796	1.16211	-1.68656
14	Sox9	11:110780000-114760000	1	0.0212996	1.16211	-1.67163
15	Sox9	11:110780000-114760000	1	0.0210196	1.18016	-1.67738
16	Sox9	11:110780000-114760000	1	0.0202596	1.18016	-1.69337
17	Sox9	11:110780000-114760000	1	0.0203796	1.18016	-1.6908
18	Sox9	11:110780000-114760000	1	0.0199996	1.18016	-1.69898
19	Sox9	11:110780000-114760000	1	0.0200196	1.18016	-1.69854
20	Sox9	11:110780000-114760000	1	0.0216396	1.16211	-1.66475
21	Sox9	11:110780000-114760000	1	0.0206596	1.16211	-1.68488
22	Sox9	11:110780000-114760000	1	0.0202996	1.16211	-1.69251
23	Sox9	11:110780000-114760000	1	0.0204796	1.16363	-1.68868
24	Sox9	11:110780000-114760000	1	0.0214996	1.16363	-1.66757
25	Sox9	11:110780000-114760000	1	0.0208796	1.16363	-1.68028
26	Sox9	11:110780000-114760000	1	0.0219396	1.16363	-1.65877
27	Sox9	11:110780000-114760000	1	0.0203796	1.18036	-1.6908
28	Sox9	11:110780000-114760000	1	0.0197396	1.17883	-1.70466
29	Sox9	11:110780000-114760000	1	0.0362993	0.952834	-1.4401
30	Sox9	11:110780000-114760000	1	0.0336793	0.999433	-1.47264
31	Sox9	11:110780000-114760000	1	0.0361393	0.952834	-1.44202
32	Sox9	11:110780000-114760000	1	0.0371593	0.937278	-1.42993
33	Sox9	11:110780000-114760000	1	0.0223996	1.10076	-1.64976
34	Sox9	11:110780000-114760000	1	0.0211596	1.16211	-1.67449
35	Sox9	11:110780000-114760000	1	0.0213396	1.16211	-1.67081
36	Sox9	11:110780000-114760000	1	0.0200396	1.16211	-1.69811
37	Sox9	11:110780000-114760000	1	0.0212596	1.16211	-1.67245
38	Sox9	11:110780000-114760000	1	0.0234395	1.10076	-1.63005
39	Sox9	11:110780000-114760000	1	0.0241995	1.10076	-1.61619
40	Sox9	11:110780000-114760000	1	0.0232595	1.10076	-1.6334
41	Sox9	11:110780000-114760000	1	0.0211596	1.16211	-1.67449
42	Sox9	11:110780000-114760000	1	0.0212796	1.16211	-1.67204
43	Sox9	11:110780000-114760000	1	0.0206796	1.16211	-1.68446
44	Sox9	11:110780000-114760000	1	0.0210796	1.16211	-1.67614
45	Sox9	11:110780000-114760000	1	0.0207396	1.16211	-1.6832
46	Sox9	11:110780000-114760000	1	0.0207196	1.16211	-1.68362
47	Sox9	11:110780000-114760000	1	0.0213996	1.16211	-1.66959
48	Sox9	11:110780000-114760000	1	0.0216196	1.16211	-1.66515
49	Sox9	11:110780000-114760000	1	0.0186996	1.18565	-1.72817
50	Sox9	11:110780000-114760000	1	0.0193996	1.19428	-1.71221
51	Sox9	11:110780000-114760000	1	0.0197796	1.19428	-1.70378
52	Sox9	11:110780000-114760000	1	0.0196596	1.19428	-1.70643
53	Sox9	11:110780000-114760000	1	0.0177996	1.21749	-1.74959
54	Sox9	11:110780000-114760000	1	0.0194796	1.19337	-1.71042
55	Sox9	11:110780000-114760000	1	0.0189596	1.18474	-1.72217
56	Sox9	11:110780000-114760000	1	0.0341993	1.00476	-1.46598
57	Sox9	11:110780000-114760000	1	0.0200796	1.18474	-1.69724
58	Sox9	11:110780000-114760000	1	0.0213196	1.16211	-1.67122
59	Sox9	11:110780000-114760000	1	0.0369193	0.983638	-1.43275
60	Sox9	11:110780000-114760000	1	0.0355793	0.983638	-1.4488
61	Sox9	11:110780000-114760000	1	0.0208796	1.16211	-1.68028
62	Sox9	11:110780000-114760000	1	0.0204196	1.16211	-1.68995
63	Sox9	11:110780000-114760000	1	0.0358793	0.983638	-1.44516
64	Sox9	11:110780000-114760000	1	0.0214796	1.16211	-1.66797
65	Sox9	11:110780000-114760000	1	0.0222596	1.16211	-1.65248
66	Sox9	11:110780000-114760000	1	0.0235995	1.10076	-1.6271
67	Sox9	11:110780000-114760000	1	0.0222396	1.10076	-1.65287
68	Sox9	11:110780000-114760000	1	0.0219796	1.10076	-1.65798
69	Sox9	11:110780000-114760000	1	0.0223396	1.10076	-1.65093
70	Sox9	11:110780000-114760000	1	0.0233995	1.10076	-1.63079
71	Sox9	11:110780000-114760000	1	0.0233195	1.10076	-1.63228
72	Sox9	11:110780000-114760000	1	0.0216796	1.11593	-1.66395
73	Sox9	11:110780000-114760000	1	0.0225195	1.11593	-1.64744
74	Sox9	11:110780000-114760000	1	0.0193596	1.18471	-1.7131
75	Sox9	11:110780000-114760000	1	0.0473191	0.957254	-1.32496
76	Sox9	11:110780000-114760000	1	0.0452591	1.01091	-1.34429
77	Sox9	11:110780000-114760000	1	0.0437791	0.996182	-1.35873
78	Sox9	11:110780000-114760000	1	0.0262995	1.205	-1.58005
79	Sox9	11:110780000-114760000	1	0.0265195	1.19788	-1.57644
80	Sox9	11:110780000-114760000	1	0.048399	0.906695	-1.31516
81	Sox9	11:110780000-114760000	1	0.0472591	0.906695	-1.32551
82	Sox9	11:110780000-114760000	1	0.048599	0.906695	-1.31337
83	Sox9	11:110780000-114760000	1	0.0474591	0.906695	-1.32368
84	Sox9	11:110780000-114760000	1	0.0367393	0.983638	-1.43487
85	Sox9	11:110780000-114760000	1	0.0361193	0.983638	-1.44226
86	Sox9	11:110780000-114760000	1	0.0352593	0.983638	-1.45273
87	Sox9	11:110780000-114760000	1	0.0364193	0.983638	-1.43867
88	Sox9	11:110780000-114760000	1	0.0224796	1.16211	-1.64821
89	Sox9	11:110780000-114760000	1	0.0193596	1.16211	-1.7131
90	Sox9	11:110780000-114760000	1	0.0212396	1.16211	-1.67285
91	Sox9	11:110780000-114760000	1	0.0204396	1.16211	-1.68953
92	Sox9	11:110780000-114760000	1	0.0209996	1.16211	-1.67779
93	Sox9	11:110780000-114760000	1	0.0207996	1.16211	-1.68195
94	Sox9	11:110780000-114760000	1	0.0219596	1.16211	-1.65838
95	Sox9	11:110780000-114760000	1	0.0215396	1.16211	-1.66676
96	Sox9	11:110780000-114760000	1	0.0216996	1.16211	-1.66355
97	Sox9	11:110780000-114760000	1	0.0290594	1.07967	-1.53671
98	Sox9	11:110780000-114760000	1	0.0202196	1.16211	-1.69423
99	Sox9	11:110780000-114760000	1	0.0288794	1.07967	-1.53941
100	Sox9	11:110780000-114760000	1	0.048959	0.906695	-1.31017
101	Sox9	11:110780000-114760000	1	0.0293794	1.07967	-1.53196
102	Sox9	11:110780000-114760000	1	0.0446791	0.927576	-1.3499
103	Sox9	11:110780000-114760000	1	0.0199396	1.18523	-1.70028
104	Sox9	11:110780000-114760000	1	0.0196996	1.18523	-1.70554
105	Sox9	11:110780000-114760000	1	0.0189196	1.20632	-1.72309
106	Sox9	11:110780000-114760000	1	0.00947981	1.4156	-2.0232
107	Sox9	11:110780000-114760000	1	0.0201196	1.18282	-1.69638
108	Sox9	11:110780000-114760000	1	0.0212396	1.18282	-1.67285
109	Sox9	11:110780000-114760000	1	0.0199596	1.18282	-1.69985
110	Sox9	11:110780000-114760000	1	0.0115798	1.36803	-1.9363
111	Sox9	11:110780000-114760000	1	0.0110598	1.36803	-1.95625
112	Sox9	11:110780000-114760000	1	0.00465991	1.50118	-2.33162
113	Sox9	11:110780000-114760000	1	0.0048199	1.50118	-2.31696
114	Sox9	11:110780000-114760000	1	0.0107398	1.36803	-1.969
115	Sox9	11:110780000-114760000	1	0.00973981	1.39328	-2.01145
116	Sox9	11:110780000-114760000	1	0.0116998	1.31212	-1.93182
117	Sox9	11:110780000-114760000	1	0.0285794	1.10234	-1.54395
118	Sox9	11:110780000-114760000	1	0.0269195	1.10234	-1.56993
119	Sox9	11:110780000-114760000	1	0.0280794	1.10969	-1.55161
120	Sox9	11:110780000-114760000	1	0.0196596	1.19768	-1.70643
121	Sox9	11:110780000-114760000	1	0.0268395	1.11421	-1.57123
122	Sox9	11:110780000-114760000	1	0.0287394	1.117	-1.54152
123	Sox9	11:110780000-114760000	1	0.0266595	1.117	-1.57415
124	Sox9	11:110780000-114760000	1	0.0213596	1.13094	-1.67041
125	Sox9	11:110780000-114760000	1	0.0234595	1.1035	-1.62968
126	Sox9	11:110780000-114760000	1	0.0207996	1.17386	-1.68195
127	Sox9	11:110780000-114760000	1	0.0454991	0.997987	-1.342
128	Sox9	11:110780000-114760000	1	0.047859	0.915359	-1.32004
129	Sox9	11:110780000-114760000	1	0.048999	0.944531	-1.30981
130	Sox9	11:110780000-114760000	1	0.0218596	1.1097	-1.66036
131	Sox9	11:110780000-114760000	1	0.0243795	1.10076	-1.61297
132	Sox9	11:110780000-114760000	1	0.0203596	1.18284	-1.69123
133	Sox9	11:110780000-114760000	1	0.0202396	1.12104	-1.6938
134	Sox9	11:110780000-114760000	1	0.0196196	1.18284	-1.70731
135	Sox9	11:110780000-114760000	1	0.0212596	1.12104	-1.67245
136	Sox9	11:110780000-114760000	1	0.0201796	1.13185	-1.69509
137	Sox9	11:110780000-114760000	1	0.0208196	1.1729	-1.68153
138	Sox9	11:110780000-114760000	1	0.0206796	1.1729	-1.68446
139	Sox9	11:110780000-114760000	1	0.0205796	1.18992	-1.68656
140	Sox9	11:110780000-114760000	1	0.0196196	1.18992	-1.70731
141	Sox9	11:110780000-114760000	1	0.0290994	1.05727	-1.53612
142	Sox9	11:110780000-114760000	1	0.130937	0.621518	-0.882936
143	Sox9	11:110780000-114760000	1	0.132517	0.651856	-0.877727
144	Sox9	11:110780000-114760000	1	0.134037	0.643415	-0.872774
145	Sox9	11:110780000-114760000	1	0.051759	0.973617	-1.28601
146	Sox9	11:110780000-114760000	1	0.242955	0.405854	-0.614474
147	Sox9	11:110780000-114760000	1	0.0758785	0.808922	-1.11988
148	Sox9	11:110780000-114760000	1	0.0309194	1.03319	-1.50977
149	Sox9	11:110780000-114760000	1	0.0314994	1.0271	-1.5017
150	Sox9	11:110780000-114760000	1	0.0676586	0.850723	-1.16968
151	Sox9	11:110780000-114760000	1	0.0701386	0.832854	-1.15404
152	Sox9	11:110780000-114760000	1	0.0361793	0.983638	-1.44154
153	Sox9	11:110780000-114760000	1	0.0206996	1.17801	-1.68404
154	Sox9	11:110780000-114760000	1	0.0207596	1.1899	-1.68278
155	Sox9	11:110780000-114760000	1	0.0429591	0.957303	-1.36694
156	Sox9	11:110780000-114760000	1	0.0408992	0.957303	-1.38829
157	Sox9	11:110780000-114760000	1	0.0415792	0.957303	-1.38112
158	Sox9	11:110780000-114760000	1	0.0431791	0.94219	-1.36473
159	Sox9	11:110780000-114760000	1	0.0460391	0.930903	-1.33687
160	Sox9	11:110780000-114760000	1	0.0468791	0.919132	-1.32902
161	Sox9	11:110780000-114760000	1	0.0350393	1.00574	-1.45544
162	Sox9	11:110780000-114760000	1	0.0325993	1.02226	-1.48679
163	Sox9	11:110780000-114760000	1	0.0323194	1.03167	-1.49054
164	Sox9	11:110780000-114760000	1	0.0427791	0.949455	-1.36877
165	Sox9	11:110780000-114760000	1	0.0629787	0.86416	-1.20081
166	Sox9	11:110780000-114760000	1	0.0426991	0.952738	-1.36958
167	Sox9	11:110780000-114760000	1	0.0424992	0.947541	-1.37162
168	Sox9	11:110780000-114760000	1	0.0447991	0.938292	-1.34873
169	Sox9	11:110780000-114760000	1	0.0326193	1.01609	-1.48652
170	Sox9	11:110780000-114760000	1	0.0346193	0.994624	-1.46068
171	Sox9	11:110780000-114760000	1	0.0459591	0.930593	-1.33763
172	Sox9	11:110780000-114760000	1	0.0457591	0.919705	-1.33952
173	Sox9	11:110780000-114760000	1	0.0391592	0.985684	-1.40717
174	Sox9	11:110780000-114760000	1	0.0445991	0.931119	-1.35067
175	Sox9	11:110780000-114760000	1	0.0441191	0.946833	-1.35537
176	Sox9	11:110780000-114760000	1	0.0456191	0.933568	-1.34085
177	Sox9	11:110780000-114760000	1	0.0323594	1.03104	-1.49
178	Sox9	11:110780000-114760000	1	0.0396792	0.968117	-1.40144
179	Sox9	11:110780000-114760000	1	0.0428191	0.956389	-1.36836
180	Sox9	11:110780000-114760000	1	0.0436391	0.948586	-1.36012
181	Sox9	11:110780000-114760000	1	0.0421792	0.956384	-1.3749
182	Sox9	11:110780000-114760000	1	0.0438991	0.941296	-1.35754
183	Sox9	11:110780000-114760000	1	0.0438791	0.941079	-1.35774
184	Sox9	11:110780000-114760000	1	0.0421192	0.957674	-1.37552
185	Sox9	11:110780000-114760000	1	0.0313794	1.02757	-1.50336
186	Sox9	11:110780000-114760000	1	0.0208596	1.15434	-1.68069
187	Sox9	11:110780000-114760000	1	0.0470391	0.933241	-1.32754
188	Sox9	11:110780000-114760000	1	0.0468591	0.922878	-1.32921
189	Sox9	11:110780000-114760000	1	0.0453591	0.922473	-1.34334
190	Sox9	11:110780000-114760000	1	0.0408992	0.99034	-1.38829
191	Sox9	11:110780000-114760000	1	0.0333393	1.02024	-1.47704
192	Sox9	11:110780000-114760000	1	0.0309194	1.04437	-1.50977
193	Sox9	11:110780000-114760000	1	0.0298594	1.05675	-1.52492
194	Sox9	11:110780000-114760000	1	0.0313994	1.0476	-1.50308
195	Sox9	11:110780000-114760000	1	0.0315394	1.04309	-1.50115
196	Sox9	11:110780000-114760000	1	0.0282594	1.03103	-1.54884
197	Sox9	11:110780000-114760000	1	0.0375792	1.12177	-1.42505
203	Sox9	11:110780000-114760000	2	0.0140397	-0.415107	-1.85264
204	Sox9	11:110780000-114760000	1	0.00535989	1.62708	-2.27084
205	Sox9	11:110780000-114760000	1	0.0167197	1.34086	-1.77677
206	Sox9	11:110780000-114760000	1	0.0622188	0.948168	-1.20608
207	Sox9	11:110780000-114760000	1	0.0394592	1.10994	-1.40385
208	Sox9	11:110780000-114760000	1	0.0383792	1.11407	-1.4159
209	Sox9	11:110780000-114760000	1	0.0390592	1.11407	-1.40828
210	Sox9	11:110780000-114760000	1	0.0377992	1.09296	-1.42252
211	Sox9	11:110780000-114760000	1	0.0179796	1.25733	-1.74522
212	Sox9	11:110780000-114760000	1	0.0409792	1.07717	-1.38744
213	Sox9	11:110780000-114760000	1	0.0182996	1.24972	-1.73756
214	Sox9	11:110780000-114760000	1	0.0429591	1.06971	-1.36694
215	Sox9	11:110780000-114760000	1	0.0450391	1.00603	-1.34641
216	Sox9	11:110780000-114760000	1	0.101018	0.700475	-0.995601
217	Sox9	11:110780000-114760000	1	0.104318	0.669903	-0.981641
218	Sox9	11:110780000-114760000	1	0.0704386	0.825963	-1.15219
219	Sox9	11:110780000-114760000	1	0.048179	0.906695	-1.31714
220	Sox9	11:110780000-114760000	1	0.0454591	0.918334	-1.34238
221	Sox9	11:110780000-114760000	1	0.0723386	0.82169	-1.14063
222	Sox9	11:110780000-114760000	1	0.0719586	0.82169	-1.14292
223	Sox9	11:110780000-114760000	1	0.0738585	0.82169	-1.1316
224	Sox9	11:110780000-114760000	1	0.0688586	0.838942	-1.16204
225	Sox9	11:110780000-114760000	1	0.0679786	0.839929	-1.16763
226	Sox9	11:110780000-114760000	1	0.0654987	0.852865	-1.18377
227	Sox9	11:110780000-114760000	1	0.0600188	0.933585	-1.22171
228	Sox9	11:110780000-114760000	1	0.0615588	0.891967	-1.21071
229	Sox9	11:110780000-114760000	1	0.0604388	0.894986	-1.21868
230	Sox9	11:110780000-114760000	1	0.0589588	0.899095	-1.22945
231	Sox9	11:110780000-114760000	1	0.0367593	1.08744	-1.43463
232	Sox9	11:110780000-114760000	1	0.0562589	0.953994	-1.24981
233	Sox9	11:110780000-114760000	1	0.0564789	0.945356	-1.24811
234	Sox9	11:110780000-114760000	1	0.0545789	0.945955	-1.26298
235	Sox9	11:110780000-114760000	1	0.0341393	1.153	-1.46675
236	Sox9	11:110780000-114760000	1	0.0621188	0.886413	-1.20678
237	Sox9	11:110780000-114760000	1	0.0576988	0.946497	-1.23883
238	Sox9	11:110780000-114760000	1	0.0177796	1.296	-1.75008
239	Sox9	11:110780000-114760000	1	0.0785584	0.848927	-1.10481
240	Sox9	11:110780000-114760000	1	0.105218	0.70972	-0.97791
241	Sox9	11:110780000-114760000	1	0.0423992	1.10535	-1.37264
242	Sox9	11:110780000-114760000	1	0.0103598	1.44237	-1.98465
243	Sox9	11:110780000-114760000	1	0.00605988	1.43059	-2.21754
244	Sox9	11:110780000-114760000	1	0.0169397	1.19536	-1.7711
245	Sox9	11:110780000-114760000	1	0.0188996	1.19146	-1.72355
246	Sox9	11:110780000-114760000	1	0.0172997	1.19103	-1.76196
247	Sox9	11:110780000-114760000	1	0.0165397	1.21105	-1.78147
248	Sox9	11:110780000-114760000	1	0.0167197	1.26754	-1.77677
249	Sox9	11:110780000-114760000	1	0.0153197	1.28172	-1.81475
250	Sox9	11:110780000-114760000	1	0.0147197	1.29161	-1.8321
251	Sox9	11:110780000-114760000	1	0.0164997	1.20296	-1.78252
252	Sox9	11:110780000-114760000	1	0.0187396	1.18303	-1.72724
253	Sox9	11:110780000-114760000	1	0.0193396	1.15947	-1.71355
254	Sox9	11:110780000-114760000	1	0.0448391	0.976499	-1.34834
255	Sox9	11:110780000-114760000	1	0.0208596	1.17725	-1.68069
256	Sox9	11:110780000-114760000	1	0.0445991	1.00359	-1.35067
257	Sox9	11:110780000-114760000	1	0.0426591	1.02282	-1.36999
258	Sox9	11:110780000-114760000	1	0.0443191	1.02282	-1.35341
259	Sox9	11:110780000-114760000	1	0.0411192	1.0268	-1.38596
260	Sox9	11:110780000-114760000	1	0.0414792	1.0268	-1.38217
261	Sox9	11:110780000-114760000	1	0.0431991	1.0268	-1.36452
262	Sox9	11:110780000-114760000	1	0.0441391	1.0075	-1.35518
263	Sox9	11:110780000-114760000	1	0.0441391	1.01584	-1.35518
264	Sox9	11:110780000-114760000	1	0.0434991	1.01993	-1.36152
265	Sox9	11:110780000-114760000	1	0.0403392	1.03861	-1.39427
266	Sox9	11:110780000-114760000	1	0.0183596	1.2145	-1.73614
267	Sox9	11:110780000-114760000	1	0.0391192	1.06253	-1.40761
268	Sox9	11:110780000-114760000	1	0.0390992	1.06507	-1.40783
269	Sox9	11:110780000-114760000	1	0.0400792	0.97017	-1.39708
270	Sox9	11:110780000-114760000	1	0.0183796	1.21118	-1.73566
271	Sox9	11:110780000-114760000	1	0.0253995	1.15366	-1.59517
272	Sox9	11:110780000-114760000	1	0.0179996	1.22934	-1.74474
273	Sox9	11:110780000-114760000	1	0.0383792	0.986486	-1.4159
274	Sox9	11:110780000-114760000	1	0.0185796	1.23191	-1.73096
275	Sox9	11:110780000-114760000	1	0.0241595	1.15937	-1.61691
276	Sox9	11:110780000-114760000	1	0.0246995	1.14352	-1.60731
277	Sox9	11:110780000-114760000	1	0.0399192	1.04353	-1.39882
278	Sox9	11:110780000-114760000	1	0.0430791	1.02507	-1.36573
279	Sox9	11:110780000-114760000	1	0.0442591	1.01777	-1.354
280	Sox9	11:110780000-114760000	1	0.0198996	1.19221	-1.70116
281	Sox9	11:110780000-114760000	1	0.0258195	1.11613	-1.58805
282	Sox9	11:110780000-114760000	1	0.0184396	1.2098	-1.73425
283	Sox9	11:110780000-114760000	1	0.0184396	1.2098	-1.73425
284	Sox9	11:110780000-114760000	1	0.0266395	1.12118	-1.57447
285	Sox9	11:110780000-114760000	1	0.0154397	1.31846	-1.81136
286	Sox9	11:110780000-114760000	1	0.0670987	0.830019	-1.17329
287	Sox9	11:110780000-114760000	1	0.0172197	1.22773	-1.76398
288	Sox9	11:110780000-114760000	1	0.047619	0.893413	-1.32222
289	Sox9	11:110780000-114760000	1	0.126257	0.641116	-0.898743
290	Sox9	11:110780000-114760000	1	0.0635387	0.923595	-1.19696
291	Sox9	11:110780000-114760000	1	0.0553989	0.960315	-1.2565
292	Sox9	11:110780000-114760000	1	0.0535389	0.964938	-1.27133
293	Sox9	11:110780000-114760000	1	0.0542989	0.969505	-1.26521
294	Sox9	11:110780000-114760000	1	0.0380192	1.08625	-1.42
295	Sox9	11:110780000-114760000	1	0.0145997	1.27623	-1.83566
296	Sox9	11:110780000-114760000	1	0.0154997	1.28122	-1.80968
297	Sox9	11:110780000-114760000	1	0.0158197	1.26916	-1.8008
298	Sox9	11:110780000-114760000	1	0.0173597	1.25786	-1.76046
299	Sox9	11:110780000-114760000	1	0.0162597	1.25337	-1.78889
300	Sox9	11:110780000-114760000	1	0.0159997	1.24939	-1.79589
301	Sox9	11:110780000-114760000	1	0.0166597	1.23629	-1.77833
302	Sox9	11:110780000-114760000	1	0.0173997	1.22134	-1.75946
303	Sox9	11:110780000-114760000	1	0.0183196	1.21067	-1.73708
304	Sox9	11:110780000-114760000	1	0.0186796	1.1927	-1.72863
305	Sox9	11:110780000-114760000	1	0.0384192	1.09718	-1.41545
306	Sox9	11:110780000-114760000	1	0.0274995	1.0949	-1.56068
307	Sox9	11:110780000-114760000	1	0.048199	0.921131	-1.31696
308	Sox9	11:110780000-114760000	1	0.0729585	0.78626	-1.13692
309	Sox9	11:110780000-114760000	1	0.0202196	1.17772	-1.69423
310	Sox9	11:110780000-114760000	1	0.0213996	1.16211	-1.66959
311	Sox9	11:110780000-114760000	1	0.0214396	1.16211	-1.66878
312	Sox9	11:110780000-114760000	1	0.0210396	1.16211	-1.67696
313	Sox9	11:110780000-114760000	1	0.0218996	1.16211	-1.65956
314	Sox9	11:110780000-114760000	1	0.0221996	1.16211	-1.65366
315	Sox9	11:110780000-114760000	1	0.0203796	1.16211	-1.6908
316	Sox9	11:110780000-114760000	1	0.0215196	1.16211	-1.66717
317	Sox9	11:110780000-114760000	1	0.0211596	1.16211	-1.67449
318	Sox9	11:110780000-114760000	1	0.0214196	1.16211	-1.66919
319	Sox9	11:110780000-114760000	1	0.0211396	1.16211	-1.6749
320	Sox9	11:110780000-114760000	1	0.0209196	1.17	-1.67945
321	Sox9	11:110780000-114760000	1	0.0213396	1.17	-1.67081
322	Sox9	11:110780000-114760000	1	0.0195796	1.18684	-1.7082
323	Sox9	11:110780000-114760000	1	0.0196396	1.18684	-1.70687
324	Sox9	11:110780000-114760000	1	0.0205396	1.18684	-1.68741
325	Sox9	11:110780000-114760000	1	0.0195596	1.17886	-1.70864
326	Sox9	11:110780000-114760000	1	0.0182396	1.19689	-1.73898
327	Sox9	11:110780000-114760000	1	0.0194796	1.1956	-1.71042
328	Sox9	11:110780000-114760000	1	0.0184796	1.1956	-1.73331
329	Sox9	11:110780000-114760000	1	0.0193396	1.1956	-1.71355
330	Sox9	11:110780000-114760000	1	0.0196196	1.1956	-1.70731
331	Sox9	11:110780000-114760000	1	0.0448991	1.00391	-1.34776
332	Sox9	11:110780000-114760000	1	0.047519	0.989205	-1.32313
333	Sox9	11:110780000-114760000	1	0.0185796	1.18396	-1.73096
334	Sox9	11:110780000-114760000	1	0.0208196	1.18396	-1.68153
335	Sox9	11:110780000-114760000	1	0.0196996	1.18396	-1.70554
336	Sox9	11:110780000-114760000	1	0.0194996	1.18396	-1.70997
337	Sox9	11:110780000-114760000	1	0.0195596	1.18396	-1.70864
338	Sox9	11:110780000-114760000	1	0.0204996	1.175	-1.68825
339	Sox9	11:110780000-114760000	1	0.0214596	1.175	-1.66838
340	Sox9	11:110780000-114760000	1	0.0189996	1.1976	-1.72126
341	Sox9	11:110780000-114760000	1	0.0195396	1.1976	-1.70908
342	Sox9	11:110780000-114760000	1	0.0187396	1.1976	-1.72724
343	Sox9	11:110780000-114760000	1	0.0194996	1.1845	-1.70997
344	Sox9	11:110780000-114760000	1	0.0202596	1.1845	-1.69337
345	Sox9	11:110780000-114760000	1	0.0220996	1.16211	-1.65562
346	Sox9	11:110780000-114760000	1	0.0207196	1.16211	-1.68362
347	Sox9	11:110780000-114760000	1	0.0205796	1.16211	-1.68656
348	Sox9	11:110780000-114760000	1	0.0219596	1.16211	-1.65838
349	Sox9	11:110780000-114760000	1	0.0217396	1.16211	-1.66275
350	Sox9	11:110780000-114760000	1	0.0209996	1.16211	-1.67779
351	Sox9	11:110780000-114760000	1	0.0208996	1.16211	-1.67986
352	Sox9	11:110780000-114760000	1	0.0208796	1.16211	-1.68028
353	Sox9	11:110780000-114760000	1	0.0209196	1.16211	-1.67945
354	Sox9	11:110780000-114760000	1	0.0210596	1.16211	-1.67655
355	Sox9	11:110780000-114760000	1	0.0205796	1.16211	-1.68656
356	Sox9	11:110780000-114760000	1	0.0219196	1.16211	-1.65917
357	Sox9	11:110780000-114760000	1	0.0234395	1.16211	-1.63005
358	Sox9	11:110780000-114760000	1	0.0223196	1.16211	-1.65131
359	Sox9	11:110780000-114760000	1	0.0203796	1.16211	-1.6908
360	Sox9	11:110780000-114760000	1	0.0214196	1.16211	-1.66919
361	Sox9	11:110780000-114760000	1	0.0215196	1.16211	-1.66717
362	Sox9	11:110780000-114760000	1	0.0209196	1.16211	-1.67945
363	Sox9	11:110780000-114760000	1	0.0203796	1.16211	-1.6908
364	Sox9	11:110780000-114760000	1	0.0200396	1.16211	-1.69811
365	Sox9	11:110780000-114760000	1	0.0213396	1.16211	-1.67081
366	Sox9	11:110780000-114760000	1	0.0214196	1.16211	-1.66919
367	Sox9	11:110780000-114760000	1	0.0204596	1.1745	-1.6891
368	Sox9	11:110780000-114760000	1	0.0201196	1.1745	-1.69638
369	Sox9	11:110780000-114760000	1	0.0202996	1.1745	-1.69251
370	Sox9	11:110780000-114760000	1	0.0213396	1.1745	-1.67081
371	Sox9	11:110780000-114760000	1	0.0210396	1.1745	-1.67696
372	Sox9	11:110780000-114760000	1	0.0215996	1.16211	-1.66555
373	Sox9	11:110780000-114760000	1	0.0204196	1.16211	-1.68995
374	Sox9	11:110780000-114760000	1	0.0196196	1.17389	-1.70731
375	Sox9	11:110780000-114760000	1	0.0197996	1.18096	-1.70334
376	Sox9	11:110780000-114760000	1	0.0203996	1.18096	-1.69038
377	Sox9	11:110780000-114760000	1	0.0196796	1.18096	-1.70598
378	Sox9	11:110780000-114760000	1	0.0199996	1.18096	-1.69898
379	Sox9	11:110780000-114760000	1	0.0195996	1.16913	-1.70775
380	Sox9	11:110780000-114760000	1	0.0216796	1.16211	-1.66395
381	Sox9	11:110780000-114760000	1	0.0205396	1.16211	-1.68741
382	Sox9	11:110780000-114760000	1	0.0202596	1.16211	-1.69337
383	Sox9	11:110780000-114760000	1	0.0205996	1.16211	-1.68614
384	Sox9	11:110780000-114760000	1	0.0201396	1.1785	-1.69595
385	Sox9	11:110780000-114760000	1	0.0202196	1.19478	-1.69423
386	Sox9	11:110780000-114760000	1	0.0199996	1.19478	-1.69898
387	Sox9	11:110780000-114760000	1	0.0168997	1.21877	-1.77212
388	Sox9	11:110780000-114760000	1	0.0174397	1.24844	-1.75846
389	Sox9	11:110780000-114760000	1	0.0172797	1.25543	-1.76246
390	Sox9	11:110780000-114760000	1	0.0155997	1.26357	-1.80688
391	Sox9	11:110780000-114760000	1	0.0164397	1.27858	-1.78411
392	Sox9	11:110780000-114760000	1	0.0159997	1.26533	-1.79589
393	Sox9	11:110780000-114760000	1	0.0165397	1.25444	-1.78147
394	Sox9	11:110780000-114760000	1	0.0174397	1.2498	-1.75846
395	Sox9	11:110780000-114760000	1	0.0161997	1.24358	-1.79049
396	Sox9	11:110780000-114760000	1	0.0163197	1.24555	-1.78729
397	Sox9	11:110780000-114760000	1	0.0171997	1.25627	-1.76448
