# Supplementary material for: Chromatin spatial analysis by METALoci unveils sex-determining 3D regulatory hubs
Source: Nat Struct Mol Biol. 2026 Feb 24;33(4):577–89. doi: 10.1038/s41594-026-01749-z (PMC13095655; doi:10.1038/s41594-026-01749-z)
Supplement: Supplementary file 13 — LMI values for the Bmp2 locus in female 10.5 and 13.5 samples and for Fgf9 locus in male 10.5 and 13.5 samples. [file 41594_2026_1749_MOESM13_ESM.xlsx]

## Sheet: ED_Fig4a_Bmp2_10.5_Female
Chr	Start	End	Region	LDBindex	LDBx	LDBy	Signal	LMIpval	LMIq	LMItype	Geometry
2	131550000	135540000	2:131550000-135530000	1	0.68754	0.790501	-3.33298	0.00963981	3	0.705625	POLYGON ((0.7086518066366578 0.840337076127827, 0.7127773681153056 0.8384164940084023, 0.7173524244298949 0.8357120526583114, 0.7216403689905145 0.8325721999957175, 0.7255999065470167 0.8290271745181793, 0.7369638696095574 0.8178008157394421, 0.6801424464725437 0.7602829182255121, 0.6662536121437677 0.7582913277163512, 0.6565879306059292 0.7859089625484899, 0.6693877698999502 0.8174804654857751, …
2	131550000	135540000	2:131550000-135530000	2	0.710268	0.768048	-3.33298	0.00895982	3	0.574091	POLYGON ((0.7369638696095574 0.8178008157394421, 0.7483278326720981 0.8065744569607047, 0.7519502163226444 0.8026230036435743, 0.7533733837058376 0.8007232788208852, 0.7533981209367081 0.8024938761189678, 0.7565801478094886 0.7955050715242905, 0.7588216008889521 0.7717133857243187, 0.7535217499101626 0.7529731847025921, 0.7199812275412375 0.7435893509203726, 0.6801424464725437 0.7602829182255121,…
2	131550000	135540000	2:131550000-135530000	3	0.695733	0.733362	-3.33298	0.00921982	3	0.574555	POLYGON ((0.6707449505296902 0.6852292996759368, 0.6707437709814644 0.6853003504580564, 0.6696725723575959 0.6858883900705467, 0.6651659174542538 0.6886569796292277, 0.660950827433291 0.6918519823956476, 0.6573377716677755 0.6951930074950121, 0.6593455695720908 0.7458754039236455, 0.6662536121437677 0.7582913277163512, 0.6801424464725437 0.7602829182255121, 0.7199812275412375 0.7435893509203726, …
2	131550000	135540000	2:131550000-135530000	4	0.72437	0.717641	-3.33298	0.0443991	3	0.428091	POLYGON ((0.7535217499101626 0.7529731847025921, 0.7536111014305316 0.7527144711501212, 0.7493726726568147 0.7067069796812593, 0.7417977019027728 0.7007317188075405, 0.6960372894223721 0.6999720281786315, 0.7199812275412375 0.7435893509203726, 0.7535217499101626 0.7529731847025921))
2	131550000	135540000	2:131550000-135530000	5	0.724941	0.683253	-3.33298	0.113458	3	0.428555	POLYGON ((0.7332948163427315 0.627757343110347, 0.718673416913216 0.6294610108003963, 0.7135525188579062 0.630308111281043, 0.708536236584513 0.6316415610441873, 0.7036706493720215 0.6334491110973883, 0.6990004522232984 0.635714157390347, 0.6945685452993796 0.6384158933387528, 0.6904156398410711 0.6415295009523643, 0.6865798841978441 0.6450263788116324, 0.6830965133993019 0.6488744047986874, 0.67…
2	131550000	135540000	2:131550000-135530000	6	0.754184	0.679846	-3.33298	0.113858	3	0.427627	POLYGON ((0.8102927199089969 0.6665750488520622, 0.7994087737573381 0.6500532792748339, 0.7961952605411794 0.6456708229629716, 0.7925587141682667 0.6416324915014068, 0.7885357529093017 0.6379789489431937, 0.7841668860468001 0.6347469847024348, 0.7794961059661256 0.6319691431025982, 0.7745704451733548 0.6296733956708519, 0.7694395027005907 0.6278828594782567, 0.7641549446675947 0.6266155643619928,…
2	131550000	135540000	2:131550000-135530000	7	0.775952	0.712889	-3.33298	0.0430191	3	0.511321	POLYGON ((0.8307023653883444 0.6958944487763539, 0.8203922111603054 0.6819060202641104, 0.8102927199089969 0.6665750488520622, 0.7493726726568147 0.7067069796812593, 0.7536111014305316 0.7527144711501212, 0.8307023653883444 0.6958944487763539))
2	131550000	135540000	2:131550000-135530000	8	0.798264	0.743162	-1.22223	1.99996e-05	4	-0.744086	POLYGON ((0.8551119670776681 0.7464044446718323, 0.8506412359032465 0.7293951063109896, 0.8491078906599132 0.7245125617593496, 0.8471205143293158 0.7197965545228642, 0.8446968540858956 0.7152891983178959, 0.8418585530983187 0.711030743617195, 0.8307023653883444 0.6958944487763539, 0.7536111014305316 0.7527144711501212, 0.7535217499101626 0.7529731847025921, 0.7588216008889521 0.7717133857243187, …
2	131550000	135540000	2:131550000-135530000	9	0.807206	0.777181	-3.33298	0.0427791	3	0.511321	POLYGON ((0.8616025108174231 0.7940377912776181, 0.8613564262370204 0.776423989011606, 0.860865325514238 0.7698649301979221, 0.8595826982520897 0.763413783032675, 0.8551119670776681 0.7464044446718323, 0.7588216008889521 0.7717133857243187, 0.7565801478094886 0.7955050715242905, 0.8616025108174231 0.7940377912776181))
2	131550000	135540000	2:131550000-135530000	10	0.807698	0.812408	-3.33298	0.0695186	3	0.476449	POLYGON ((0.8542748764734875 0.8449661680947405, 0.8594000079649764 0.8285252796824517, 0.8608085315287896 0.8229973317922253, 0.8616277572913987 0.8173518897673036, 0.8618485953978259 0.8116515935436301, 0.8616025108174231 0.7940377912776181, 0.7565801478094886 0.7955050715242905, 0.7533981209367081 0.8024938761189678, 0.7534266053332097 0.8045326813412452, 0.7508706600577277 0.8127318877678317,…
2	131550000	135540000	2:131550000-135530000	11	0.797448	0.84529	-3.33298	0.0256795	3	0.537475	POLYGON ((0.8523062271416735 0.8591597641485733, 0.8519877475277936 0.8523030397131787, 0.8542748764734875 0.8449661680947405, 0.7508706600577277 0.8127318877678317, 0.7457455285662389 0.8291727761801204, 0.744538919522438 0.833734058998944, 0.7437339006587061 0.8383830536178815, 0.7433365822662623 0.8430844730240715, 0.7433499800894499 0.8478026322876199, 0.7439484489654912 0.8606874010054171, 0…
2	131550000	135540000	2:131550000-135530000	12	0.79897	0.878055	-3.33298	1.99996e-05	3	0.720556	POLYGON ((0.831526806230274 0.9244911397704635, 0.8418210590255032 0.9111702132368664, 0.8449307522757689 0.9066982606648467, 0.8475755072289328 0.9019365568568746, 0.849728569871254 0.8969332706192721, 0.8513681600875469 0.8917390145763168, 0.8524776919861304 0.8864063331791989, 0.8530459416796553 0.8809891711728574, 0.8530671608245594 0.875542327897617, 0.8523062271416735 0.8591597641485733, 0.…
2	131550000	135540000	2:131550000-135530000	13	0.778381	0.904697	-3.33298	0.114398	3	0.406907	POLYGON ((0.8234270533372503 0.9394558854427328, 0.8264479433442029 0.9310632689696725, 0.831526806230274 0.9244911397704635, 0.7529581990424611 0.8637742592951825, 0.7438275894769024 0.8608437951022403, 0.7355294436638192 0.8715817275136518, 0.7323192275138286 0.8762156144719397, 0.7296081023920213 0.8811581033839918, 0.7274254440300326 0.8863556411228344, 0.7215159442984516 0.9027733738706895, …
2	131550000	135540000	2:131550000-135530000	14	0.766562	0.937532	-3.33298	0.452951	3	0.0711562	POLYGON ((0.7867792728436254 0.9906657485733213, 0.8003047913139303 0.979891472084406, 0.8040577448225713 0.9766084324713781, 0.8074928332348145 0.9729941307768865, 0.810580936054778 0.9690792067530943, 0.8132958743098538 0.9648968486371677, 0.815614632479395 0.9604825118024986, 0.8175175536056692 0.9558736181905879, 0.8234270533372503 0.9394558854427328, 0.7215159442984516 0.9027733738706895, 0.…
2	131550000	135540000	2:131550000-135530000	15	0.739511	0.959081	-3.33298	0.120498	2	-0.423591	POLYGON ((0.7270839533275436 1.014433660760629, 0.7439241129733789 1.0130567831379, 0.749211438663226 1.012361033208091, 0.7544046993661657 1.011148628908096, 0.7594535363189823 1.009431326855684, 0.7643089912276161 1.007225779634342, 0.7689239810130472 1.00455337431409, 0.7732537543733204 1.001440025062237, 0.7867792728436254 0.9906657485733213, 0.7192936883883045 0.9059475292136416, 0.718664602…
2	131550000	135540000	2:131550000-135530000	16	0.705831	0.961835	-0.341051	0.353593	1	0.205834	POLYGON ((0.7269137695428295 1.014468354214633, 0.7269422488812434 1.014445246736371, 0.7270839533275436 1.014433660760629, 0.7182576516721059 0.9064819252496227, 0.713522537701512 0.9068690755263599, 0.701817740966592 0.913253303027543, 0.67328190710433 0.9483685425942976, 0.7269137695428295 1.014468354214633))
2	131550000	135540000	2:131550000-135530000	17	0.679753	0.982993	-0.709681	0.222176	1	0.377684	POLYGON ((0.6906125162168758 1.03888002307794, 0.7059769461166036 1.030376722296029, 0.7100433884476709 1.027886246419281, 0.713874991299207 1.025047718118795, 0.7269137695428295 1.014468354214633, 0.67328190710433 0.9483685425942976, 0.66190221518856 0.9530664790534916, 0.6512594718679743 0.9677738601011084, 0.6906125162168758 1.03888002307794))
2	131550000	135540000	2:131550000-135530000	18	0.649024	1	-1.37697	0.0821984	1	0.429421	POLYGON ((0.6067861934207229 1.037615163356123, 0.620686915948229 1.046150482414236, 0.6252416816062548 1.048654503957642, 0.6300155192060621 1.05071034652458, 0.6349644547375335 1.052299072805194, 0.6400429012831035 1.053406048312222, 0.6452040789397888 1.054021076185984, 0.6504004457303546 1.054138491122333, 0.6555841355342956 1.053757211558379, 0.6607073990046519 1.052880749635256, 0.665723043…
2	131550000	135540000	2:131550000-135530000	19	0.621223	0.982929	-3.33298	0.0381792	2	-0.633939	POLYGON ((0.5712416204422394 0.9547027532768818, 0.5679057274224493 0.9734339975742724, 0.5672253840224092 0.9787879533662516, 0.5670813141069644 0.9841830394289482, 0.5674749485020281 0.9895656746318451, 0.5684023778397693 0.9948824014997535, 0.5698543913843791 1.000080417124077, 0.5718165685082076 1.005108097573267, 0.5742694219097829 1.009915510594302, 0.577188591151343 1.014454911513319, 0.58…
2	131550000	135540000	2:131550000-135530000	20	0.627895	0.945467	-0.837617	0.295534	1	0.194381	POLYGON ((0.5735814774047664 0.9380064575747312, 0.5751483628353488 0.9334882181387525, 0.5745775134620293 0.9359715089794913, 0.5712416204422394 0.9547027532768818, 0.6491739748032959 0.9685819164975051, 0.6512594718679743 0.9677738601011084, 0.66190221518856 0.9530664790534916, 0.6018921112166307 0.8945592393598377, 0.5891180345994269 0.9076614412404528, 0.5855573505094152 0.9116966163564663, 0…
2	131550000	135540000	2:131550000-135530000	21	0.653443	0.919262	-1.01101	0.390552	1	0.0851018	POLYGON ((0.6060354552319832 0.8872104293737156, 0.6048669697733642 0.8915079661802089, 0.6018921112166307 0.8945592393598377, 0.66190221518856 0.9530664790534916, 0.67328190710433 0.9483685425942976, 0.701817740966592 0.913253303027543, 0.6060354552319832 0.8872104293737156))
2	131550000	135540000	2:131550000-135530000	22	0.663146	0.883576	-3.16084	0.416932	2	-0.0446843	POLYGON ((0.6060610931030248 0.8772993561571139, 0.6072952150084654 0.8825771975548357, 0.6060354552319832 0.8872104293737156, 0.701817740966592 0.913253303027543, 0.713522537701512 0.9068690755263599, 0.7129211782007807 0.9069182436136694, 0.7154043942885651 0.8977852993763125, 0.7165532280424505 0.8925486096274543, 0.7171786565055569 0.887223989663795, 0.7172745503487458 0.8818636218694452, 0.7…
2	131550000	135540000	2:131550000-135530000	23	0.654444	0.846361	-3.33298	0.252095	3	0.225958	POLYGON ((0.597068841561744 0.8517511382444652, 0.6030272058227276 0.864324644490961, 0.6060610931030248 0.8772993561571139, 0.7115281218992981 0.852637915857791, 0.7087621770711927 0.8408090859397468, 0.6693877698999502 0.8174804654857751, 0.597068841561744 0.8517511382444652))
2	131550000	135540000	2:131550000-135530000	24	0.637572	0.810759	-3.33298	0.316794	3	0.123678	POLYGON ((0.5870133259168518 0.8306786028331876, 0.5871931304675432 0.8305572892263955, 0.5886331816503773 0.8339499737061674, 0.597068841561744 0.8517511382444652, 0.6693877698999502 0.8174804654857751, 0.6565879306059292 0.7859089625484899, 0.6013085990504941 0.7968723723118774, 0.5979475882719104 0.7999931301926148, 0.5870133259168518 0.8306786028331876))
2	131550000	135540000	2:131550000-135530000	25	0.629528	0.770197	-3.33298	0.0820784	3	0.375706	POLYGON ((0.6662536121437677 0.7582913277163512, 0.6593455695720908 0.7458754039236455, 0.6121612010964997 0.7562335175067049, 0.6013085990504941 0.7968723723118774, 0.6565879306059292 0.7859089625484899, 0.6662536121437677 0.7582913277163512))
2	131550000	135540000	2:131550000-135530000	26	0.622082	0.736279	-1.22892	0.0609588	4	-0.498484	POLYGON ((0.6573377716677755 0.6951930074950121, 0.6573007566723309 0.6952272355935689, 0.655253089129452 0.6934710893923519, 0.6508433916653317 0.6903919824748416, 0.6461500261959282 0.6877654540236078, 0.6412192824764769 0.6856174089804069, 0.636099791477949 0.6839690330977509, 0.6308420457491981 0.6828365839879316, 0.6254979014187227 0.6822312307773361, 0.6201200667477085 0.6821589439475159, 0…
2	131550000	135540000	2:131550000-135530000	27	0.590145	0.75968	-3.33298	0.184696	3	0.277177	POLYGON ((0.5741050509088043 0.7042954038722197, 0.5581365818671438 0.7159958375921209, 0.5564586896522721 0.7172762528536742, 0.5416081496323609 0.7290737483555056, 0.5979475882719104 0.7999931301926148, 0.6013085990504941 0.7968723723118774, 0.6121612010964997 0.7562335175067049, 0.5741050509088043 0.7042954038722197))
2	131550000	135540000	2:131550000-135530000	28	0.560444	0.783275	-0.964266	0.0923982	4	-0.468827	POLYGON ((0.5416081496323609 0.7290737483555056, 0.5284076341156501 0.7395604392247569, 0.5140554585924277 0.7492438102592515, 0.5140655337196891 0.7495961499795341, 0.5649880315033406 0.8250707572901913, 0.5837408527288942 0.83367479744283, 0.5836989444521016 0.8329148063565557, 0.5870133259168518 0.8306786028331876, 0.5979475882719104 0.7999931301926148, 0.5416081496323609 0.7290737483555056))
2	131550000	135540000	2:131550000-135530000	29	0.527933	0.80521	-3.33298	0.247555	3	0.190872	POLYGON ((0.4968569002068564 0.8288277201811159, 0.5649880315033406 0.8250707572901913, 0.5140655337196891 0.7495961499795341, 0.4924188274027614 0.8147890796674174, 0.4968569002068564 0.8288277201811159))
2	131550000	135540000	2:131550000-135530000	30	0.530341	0.848885	-0.837884	0.419612	4	-0.103858	POLYGON ((0.5854304730367561 0.8677822190558859, 0.5844393415360504 0.846379813375424, 0.5844151681104475 0.845903257273195, 0.5837408527288942 0.83367479744283, 0.5649880315033406 0.8250707572901913, 0.4968569002068564 0.8288277201811159, 0.4876840373876773 0.8597261906947591, 0.4905469706992477 0.8721762123979446, 0.5854304730367561 0.8677822190558859))
2	131550000	135540000	2:131550000-135530000	31	0.532324	0.89169	-3.33298	0.301974	2	-0.153366	POLYGON ((0.5806560886545019 0.9176062503107625, 0.5834901604096037 0.9094339777767494, 0.5849428878055528 0.9044992742837886, 0.5859208595894079 0.8994489983863387, 0.5864152520460721 0.8943287160162761, 0.5864216045374618 0.8891846247363479, 0.5854304730367561 0.8677822190558859, 0.4905469706992477 0.8721762123979446, 0.4843895234981613 0.895583390598147, 0.5753068739659793 0.9271127227315427, …
2	131550000	135540000	2:131550000-135530000	32	0.519621	0.928318	-1.01757	0.429731	4	-0.0761506	POLYGON ((0.5595051730697791 0.9694948337516355, 0.5679724723671828 0.9527113301405691, 0.5707878203195916 0.9460621911762275, 0.5735814774047664 0.9380064575747312, 0.5753068739659793 0.9271127227315427, 0.4843895234981613 0.895583390598147, 0.4797524418000573 0.90141131958272, 0.4768410776926619 0.9115575340288787, 0.4891522314071909 0.934001683613595, 0.5595051730697791 0.9694948337516355))
2	131550000	135540000	2:131550000-135530000	33	0.502687	0.961885	-3.33298	0.455131	3	0.0736959	POLYGON ((0.4948748354329153 1.015554126901152, 0.4949294996496751 1.015467368700313, 0.4997892406765566 1.015963505378817, 0.5050090495553641 1.015991250300452, 0.5102072828176917 1.015516334031636, 0.5153356474402601 1.014543168675726, 0.5203464994987582 1.013080795207764, 0.5251932867930639 1.011142799481321, 0.5298309813300455 1.008747186012164, 0.5342164976460592 1.00591621071133, 0.53830909…
2	131550000	135540000	2:131550000-135530000	34	0.467984	0.956642	-3.33298	0.210996	2	-0.236917	POLYGON ((0.4392622631778235 0.9612544993273405, 0.4810561953532875 0.9875878320334734, 0.4891522314071909 0.934001683613595, 0.4768410776926619 0.9115575340288787, 0.4503960391549446 0.9294822859795917, 0.4392622631778235 0.9612544993273405))
2	131550000	135540000	2:131550000-135530000	35	0.447499	0.989154	-2.55048	0.209376	2	-0.0784795	POLYGON ((0.4168124176676196 1.036856620457287, 0.4330653472990758 1.041351064246744, 0.4382595604393856 1.042515985014707, 0.4435430478297822 1.043165332023724, 0.4488647613182351 1.043292831393991, 0.4541732834186885 1.042897251248385, 0.4594173240980226 1.041982413614656, 0.4645462163315865 1.040557157497641, 0.4695104056393292 1.038635253478318, 0.4742619288727155 1.036235270664798, 0.4787548…
2	131550000	135540000	2:131550000-135530000	36	0.414994	0.980165	-0.395564	0.252075	1	0.385465	POLYGON ((0.3608557692316589 0.9791814996839447, 0.3608434519362835 0.9793698889559279, 0.3610401906490939 0.9848449877880812, 0.3617890961970729 0.9902721927614694, 0.3630825041736689 0.9955959610837239, 0.3649071776565536 1.000761808547967, 0.3672444426761797 1.005716867131979, 0.3700703793278574 1.010410426057109, 0.373356066571482 1.014794450769636, 0.3770678782135974 1.018824074533267, 0.381…
2	131550000	135540000	2:131550000-135530000	37	0.419702	0.939723	-1.09917	0.0301394	1	0.616754	POLYGON ((0.4374345473013095 0.9622823154958217, 0.4392622631778235 0.9612544993273405, 0.4503960391549446 0.9294822859795917, 0.3791513070108617 0.9061842391701783, 0.3702624758043988 0.9544625159912443, 0.4374345473013095 0.9622823154958217))
2	131550000	135540000	2:131550000-135530000	38	0.431683	0.903085	-3.33298	0.0220796	2	-0.579137	POLYGON ((0.3771469317263981 0.8956164154073072, 0.3770078561689729 0.8952110470771732, 0.3791513070108617 0.9061842391701783, 0.4503960391549446 0.9294822859795917, 0.4768410776926619 0.9115575340288787, 0.4797524418000573 0.90141131958272, 0.394859864305891 0.8696650587660242, 0.3790543911525053 0.8897834613832899, 0.3771469317263981 0.8956164154073072))
2	131550000	135540000	2:131550000-135530000	39	0.444576	0.868607	-0.563345	0.419492	4	-0.0932593	POLYGON ((0.4843895234981613 0.895583390598147, 0.4905469706992477 0.8721762123979446, 0.4876840373876773 0.8597261906947591, 0.4239867490891573 0.8392213739242721, 0.3982271398264298 0.8582470568666211, 0.394859864305891 0.8696650587660242, 0.4797524418000573 0.90141131958272, 0.4843895234981613 0.895583390598147))
2	131550000	135540000	2:131550000-135530000	40	0.457852	0.827365	-3.33298	0.323354	2	-0.111157	POLYGON ((0.4876840373876773 0.8597261906947591, 0.4968569002068564 0.8288277201811159, 0.4924188274027614 0.8147890796674174, 0.4518723234306398 0.8032243574982358, 0.4302778502103409 0.8178625404338806, 0.4239867490891573 0.8392213739242721, 0.4876840373876773 0.8597261906947591))
2	131550000	135540000	2:131550000-135530000	41	0.469687	0.78587	-3.33298	0.472831	3	0.0200429	POLYGON ((0.5140554585924277 0.7492438102592515, 0.5127303722653761 0.7501378421456937, 0.5124720464964445 0.749588397789645, 0.4500461995933792 0.7789384215453033, 0.4518723234306398 0.8032243574982358, 0.4924188274027614 0.8147890796674174, 0.5140655337196891 0.7495961499795341, 0.5140554585924277 0.7492438102592515))
2	131550000	135540000	2:131550000-135530000	42	0.457238	0.759391	-3.33298	0.109958	3	0.303322	POLYGON ((0.5124720464964445 0.749588397789645, 0.5062472397550456 0.7363485845658203, 0.5037226842631519 0.7316054681418614, 0.5007405415153254 0.7271358643032126, 0.4973301670736091 0.7229837708540996, 0.4935251319193338 0.7191900600958041, 0.4893628919877085 0.7157920764886536, 0.4848844194597732 0.7128232690413093, 0.4840722444898176 0.7123940851204748, 0.4617914309415848 0.7100944060688237, …
2	131550000	135540000	2:131550000-135530000	43	0.431662	0.78873	-3.33298	0.389792	2	-0.0681681	POLYGON ((0.4518723234306398 0.8032243574982358, 0.4500461995933792 0.7789384215453033, 0.4146847265398342 0.7481130272448471, 0.3926040242242078 0.7673833952992363, 0.4302778502103409 0.8178625404338806, 0.4518723234306398 0.8032243574982358))
2	131550000	135540000	2:131550000-135530000	44	0.401955	0.810901	-1.88063	0.369893	1	0.0312433	POLYGON ((0.3982271398264298 0.8582470568666211, 0.4239867490891573 0.8392213739242721, 0.4302778502103409 0.8178625404338806, 0.3926040242242078 0.7673833952992363, 0.3912691896656568 0.7677789017451412, 0.3804260113094283 0.8304310896728827, 0.3982271398264298 0.8582470568666211))
2	131550000	135540000	2:131550000-135530000	45	0.366713	0.804802	-1.03242	0.203176	1	0.241049	POLYGON ((0.3358097050057318 0.8147069155954181, 0.3804260113094283 0.8304310896728827, 0.3912691896656568 0.7677789017451412, 0.3731096537783604 0.7654744138737862, 0.3520495750524165 0.7737308001000818, 0.3351554815692087 0.7991826953984913, 0.3358097050057318 0.8147069155954181))
2	131550000	135540000	2:131550000-135530000	46	0.353674	0.841799	-0.336022	0.0899182	1	0.590578	POLYGON ((0.3761940231890452 0.8928389399852517, 0.375659869091878 0.8912820225914866, 0.3791360665385598 0.8895337004891763, 0.3790543911525053 0.8897834613832899, 0.394859864305891 0.8696650587660242, 0.3982271398264298 0.8582470568666211, 0.3804260113094283 0.8304310896728827, 0.3358097050057318 0.8147069155954181, 0.3299832591856589 0.8230985001074815, 0.3463265254021936 0.8736305381345808, 0…
2	131550000	135540000	2:131550000-135530000	47	0.321731	0.85213	-1.20846	0.00183996	1	0.805608	POLYGON ((0.2802709530922302 0.8667530322365984, 0.3463265254021936 0.8736305381345808, 0.3299832591856589 0.8230985001074815, 0.2929967735333946 0.8376203527885434, 0.2774963806544777 0.8594313284526932, 0.2802709530922302 0.8667530322365984))
2	131550000	135540000	2:131550000-135530000	48	0.317829	0.889603	-1.56155	1.99996e-05	1	0.745389	POLYGON ((0.2879378371072638 0.9185674699637663, 0.3691140096451868 0.890717190092062, 0.3463265254021936 0.8736305381345808, 0.2802709530922302 0.8667530322365984, 0.2773755671663303 0.9026034867280683, 0.2806029472624424 0.9110463674406954, 0.2879378371072638 0.9185674699637663))
2	131550000	135540000	2:131550000-135530000	49	0.329315	0.923081	-1.18127	0.000199996	1	1.02255	POLYGON ((0.3770078561689729 0.8952110470771732, 0.3761940231890452 0.8928389399852517, 0.3691140096451868 0.890717190092062, 0.2879378371072638 0.9185674699637663, 0.2884993934086225 0.9201872942222304, 0.3658328971356076 0.9611109399939388, 0.3702624758043988 0.9544625159912443, 0.3791513070108617 0.9061842391701783, 0.3770078561689729 0.8952110470771732))
2	131550000	135540000	2:131550000-135530000	50	0.313849	0.952307	-0.447909	0.00157997	1	1.82696	POLYGON ((0.3299766404093182 1.006558203209796, 0.3436975654372044 0.9974948844152872, 0.3480623862357642 0.9942870477022593, 0.3520849189134674 0.9906592235833418, 0.3557249200735986 0.9866477065965608, 0.3589459733530182 0.9822926299322379, 0.3608630026305865 0.9790708670558883, 0.3608557692316589 0.9791814996839447, 0.3658328971356076 0.9611109399939388, 0.2884993934086225 0.9201872942222304, …
2	131550000	135540000	2:131550000-135530000	51	0.286407	0.970434	-0.261837	0.00699986	1	1.86149	POLYGON ((0.2383331394023621 1.001242060364754, 0.2524201274972195 1.012597250849143, 0.2566674780443063 1.015693337498968, 0.2611949565212591 1.018363108622827, 0.2659599170108842 1.020581416704535, 0.2709174766691203 1.022327366717592, 0.2760209384923827 1.023584512942804, 0.2812222311731162 1.02434101387632, 0.2864723619004012 1.024589743768933, 0.2917218778405266 1.024328359746027, 0.29692133…
2	131550000	135540000	2:131550000-135530000	52	0.258233	0.947723	-0.38475	0.00097998	1	1.93501	POLYGON ((0.2041776595791133 0.9650753061865029, 0.214011698673343 0.9789858009012252, 0.2170823552891311 0.9829297422284137, 0.2205035539749176 0.9865737791103294, 0.2242461513075046 0.9898868698803659, 0.2383331394023621 1.001242060364754, 0.2867716614257043 0.9411503442448493, 0.2884993934086225 0.9201872942222304, 0.2879378371072638 0.9185674699637663, 0.2806029472624424 0.9110463674406954, 0…
2	131550000	135540000	2:131550000-135530000	53	0.238565	0.919902	-1.04514	0.000279994	1	1.48409	POLYGON ((0.1848416639090196 0.9028124934174964, 0.1844279484945233 0.9184721768935108, 0.1845243786858955 0.9234347449898103, 0.1850747554212669 0.9283676413338839, 0.1860744554851657 0.9332294291402833, 0.1875150813046099 0.9379792689418518, 0.1893845314894977 0.9425772616450253, 0.1916671024854027 0.946984783685908, 0.1943436204848836 0.9511648114717807, 0.2041776595791133 0.9650753061865029, …
2	131550000	135540000	2:131550000-135530000	54	0.239533	0.883279	-0.172201	0.000119998	1	2.00393	POLYGON ((0.2510798408319774 0.8506222264369425, 0.1920656114604765 0.9003496708230683, 0.2773755671663303 0.9026034867280683, 0.2802709530922302 0.8667530322365984, 0.2774963806544777 0.8594313284526932, 0.2565010729939877 0.8500755700835161, 0.2510798408319774 0.8506222264369425))
2	131550000	135540000	2:131550000-135530000	55	0.216938	0.856465	-0.204617	0.00423992	1	2.25968	POLYGON ((0.1758706219779105 0.816108952009423, 0.1677167430489305 0.8338773867653626, 0.1658103450983449 0.8386074020390727, 0.1643573204290064 0.8434957675067742, 0.1633705538219552 0.8484991353024427, 0.162858795487658 0.8535731377701995, 0.1628265834730058 0.8586727808970894, 0.1632742034199181 0.8637528433001166, 0.1641976860323965 0.8687682772294963, 0.1655888422744891 0.8736746080322053, 0…
2	131550000	135540000	2:131550000-135530000	56	0.233245	0.820928	-0.244104	0.0135397	1	1.54027	POLYGON ((0.2432518086605915 0.7645748197375962, 0.2249522119431827 0.7674105398116606, 0.2197198829309187 0.7684879712070616, 0.2146191620801535 0.7700756651659034, 0.2096996816626364 0.7721581727231625, 0.2050093104004742 0.774715230158469, 0.2005936876822749 0.7777219561710775, 0.1964957794716945 0.7811490939859359, 0.1927554602295911 0.7849632960350578, 0.1894091249178702 0.7891274484441206, …
2	131550000	135540000	2:131550000-135530000	57	0.269844	0.815256	-1.24468	0.000199996	1	0.957241	POLYGON ((0.2641360155456047 0.7607375067618141, 0.2640193331634419 0.7610404360510972, 0.259673120206835 0.7620301602287968, 0.2432518086605915 0.7645748197375962, 0.2565010729939877 0.8500755700835161, 0.2774963806544777 0.8594313284526932, 0.2929967735333946 0.8376203527885434, 0.2793486925024345 0.7776870219210966, 0.2641360155456047 0.7607375067618141))
2	131550000	135540000	2:131550000-135530000	58	0.304183	0.807437	-0.85956	0.00123998	1	1.11073	POLYGON ((0.2929967735333946 0.8376203527885434, 0.3299832591856589 0.8230985001074815, 0.3358097050057318 0.8147069155954181, 0.3351554815692087 0.7991826953984913, 0.2793486925024345 0.7776870219210966, 0.2929967735333946 0.8376203527885434))
2	131550000	135540000	2:131550000-135530000	59	0.317723	0.772284	-3.33298	0.00239995	2	-0.845603	POLYGON ((0.2867020424546334 0.7237117657754348, 0.2747188681116718 0.7393672234741802, 0.2717842877772958 0.7436046758140363, 0.2692658492735857 0.748101922924713, 0.2671863661843104 0.7528182259422127, 0.2641360155456047 0.7607375067618141, 0.2793486925024345 0.7776870219210966, 0.3351554815692087 0.7991826953984913, 0.3520495750524165 0.7737308001000818, 0.2867020424546334 0.7237117657754348))
2	131550000	135540000	2:131550000-135530000	60	0.341689	0.740973	-0.349263	0.449651	4	-0.0755126	POLYGON ((0.3376943302495176 0.6836877037762877, 0.320169658776032 0.6912762460862829, 0.3152321079727778 0.6937196551132376, 0.3105683399668365 0.6966520472415996, 0.306226615930082 0.7000430777628995, 0.3022518644888308 0.7038576559293541, 0.2986852167975951 0.7080563080766894, 0.2867020424546334 0.7237117657754348, 0.3520495750524165 0.7737308001000818, 0.3731096537783604 0.7654744138737862, 0…
2	131550000	135540000	2:131550000-135530000	61	0.376739	0.725796	-3.33298	0.417712	2	-0.0544748	POLYGON ((0.3560492556211998 0.67427702461772, 0.3503531372111725 0.6782061806351596, 0.3376943302495176 0.6836877037762877, 0.3731096537783604 0.7654744138737862, 0.3912691896656568 0.7677789017451412, 0.3926040242242078 0.7673833952992363, 0.4146847265398342 0.7481130272448471, 0.4151517938531076 0.7469938528184816, 0.363553568139472 0.672191630125448, 0.3560492556211998 0.67427702461772))
2	131550000	135540000	2:131550000-135530000	62	0.40898	0.703556	-3.33298	0.263155	2	-0.162049	POLYGON ((0.385775898197444 0.6639877909096388, 0.3681795098525017 0.668792402821029, 0.363553568139472 0.672191630125448, 0.4151517938531076 0.7469938528184816, 0.455777190370841 0.7118810185821496, 0.385775898197444 0.6639877909096388))
2	131550000	135540000	2:131550000-135530000	63	0.431063	0.671279	-3.33298	0.437311	3	0.0492333	POLYGON ((0.4099471860434012 0.6433399861333282, 0.385775898197444 0.6639877909096388, 0.455777190370841 0.7118810185821496, 0.4617914309415848 0.7100944060688237, 0.4416366965541293 0.6394789031896396, 0.4099471860434012 0.6433399861333282))
2	131550000	135540000	2:131550000-135530000	64	0.467403	0.660907	-0.539866	1.99996e-05	4	-1.21758	POLYGON ((0.4840722444898176 0.7123940851204748, 0.4840414928096386 0.7123778347715233, 0.4874667328982434 0.7112092775410885, 0.4924608946432367 0.7089170999501982, 0.4971970656966792 0.7061306302489692, 0.5016264842208783 0.7028785568825127, 0.50570354658693 0.6991943619763412, 0.5093862768925467 0.6951159766169832, 0.5126367591301771 0.6906853903277679, 0.5215446339587185 0.6771540154108843, 0…
2	131550000	135540000	2:131550000-135530000	65	0.485218	0.633844	-3.33298	0.398632	3	0.0835503	POLYGON ((0.5215446339587185 0.6771540154108843, 0.5233486019268513 0.6744137246698603, 0.5252999973430704 0.6732958272891451, 0.4890679885849213 0.6100494354192287, 0.4843649391463198 0.6086366807201823, 0.4515983997053331 0.6302952525160259, 0.4513571677209968 0.6309487208551928, 0.5215446339587185 0.6771540154108843))
2	131550000	135540000	2:131550000-135530000	66	0.511542	0.618765	-3.33298	0.246055	2	-0.261951	POLYGON ((0.5252999973430704 0.6732958272891451, 0.5384616725467198 0.6657558883748216, 0.5428401189218277 0.6629604757464828, 0.546930590916914 0.6597584196445717, 0.5506954523980214 0.6561791819533246, 0.5541000631497411 0.6522556949772222, 0.5571130975973039 0.6480240584332629, 0.5597068330309043 0.6435232073001041, 0.5618574046803285 0.6387945535801683, 0.5635450252929612 0.6338816052708343, …
2	131550000	135540000	2:131550000-135530000	67	0.498968	0.588072	-0.462402	1.99996e-05	4	-1.27133	POLYGON ((0.5553686768297359 0.5828883634805322, 0.5490818300180216 0.5675420519856411, 0.5468825765887265 0.5628317804451103, 0.5442418399047123 0.558354070829972, 0.5411839516305956 0.5541501806155611, 0.537737087052603 0.5502588443138801, 0.5339330054723713 0.5467159165750258, 0.5298067575777429 0.5435540418235731, 0.5253963624868314 0.5408023534738748, 0.5207424574410663 0.5384862054957003, 0…
2	131550000	135540000	2:131550000-135530000	68	0.461508	0.597973	-3.33298	0.363793	2	-0.0984512	POLYGON ((0.4663987136683785 0.5406647662553034, 0.4476685623149947 0.5456154892870158, 0.4436718423802729 0.5468387291581602, 0.4247862646675057 0.5534260579689492, 0.4515983997053331 0.6302952525160259, 0.4843649391463198 0.6086366807201823, 0.4663987136683785 0.5406647662553034))
2	131550000	135540000	2:131550000-135530000	69	0.423737	0.611148	-3.33298	0.177616	2	-0.283668	POLYGON ((0.4247862646675057 0.5534260579689492, 0.4098615477646059 0.5586318302859314, 0.3949451434987472 0.5613615295349169, 0.4099471860434012 0.6433399861333282, 0.4416366965541293 0.6394789031896396, 0.4513571677209968 0.6309487208551928, 0.4515983997053331 0.6302952525160259, 0.4247862646675057 0.5534260579689492))
2	131550000	135540000	2:131550000-135530000	70	0.385651	0.618118	-0.734583	0.395592	4	-0.137608	POLYGON ((0.3949451434987472 0.5613615295349169, 0.3797939771727684 0.564134190197912, 0.3645180320125075 0.5646713779055307, 0.3681795098525017 0.668792402821029, 0.385775898197444 0.6639877909096388, 0.4099471860434012 0.6433399861333282, 0.3949451434987472 0.5613615295349169))
2	131550000	135540000	2:131550000-135530000	71	0.347192	0.61947	-0.0173043	0.430291	4	-0.123417	POLYGON ((0.3270914298234234 0.6732101833173814, 0.3460380696495314 0.6736138237966703, 0.3490948013951642 0.6735926551841682, 0.3574682668175524 0.6732981972866119, 0.3560492556211998 0.67427702461772, 0.363553568139472 0.672191630125448, 0.3681795098525017 0.668792402821029, 0.3645180320125075 0.5646713779055307, 0.3468163667179314 0.5652938675060671, 0.3293983915963942 0.5649227938016621, 0.32…
2	131550000	135540000	2:131550000-135530000	72	0.309298	0.618663	-0.303798	0.00777984	1	2.02665	POLYGON ((0.2976788173096351 0.6747491004527517, 0.3121769681587721 0.6728924446307377, 0.3270914298234234 0.6732101833173814, 0.3293983915963942 0.5649227938016621, 0.3104517517702862 0.5645191533223731, 0.3064275232543221 0.5645830088771101, 0.3024191501227732 0.5649455520039879, 0.28392057578758 0.567314508300262, 0.2976788173096351 0.6747491004527517))
2	131550000	135540000	2:131550000-135530000	73	0.272301	0.623401	-2.25936	1.99996e-05	1	0.0477931	POLYGON ((0.2474542203103295 0.6750822847915702, 0.2661878418357138 0.6772105925180059, 0.2726868275288026 0.6775553674167824, 0.2791802429744418 0.6771180567490258, 0.2976788173096351 0.6747491004527517, 0.28392057578758 0.567314508300262, 0.2719126115170404 0.5688522669431002, 0.2657542016310436 0.568152616246882, 0.2665323019205624 0.5671809010731207, 0.2590770150606906 0.5727770423607049, 0.2…
2	131550000	135540000	2:131550000-135530000	74	0.234834	0.619144	-0.0731033	0.0415392	1	1.19462	POLYGON ((0.2348791423460096 0.6763644836173035, 0.2408288845135846 0.6743295871165725, 0.2474542203103295 0.6750822847915702, 0.2590770150606906 0.5727770423607049, 0.2499097207001818 0.5753662014572876, 0.2107957698604333 0.6059481962221579, 0.2348791423460096 0.6763644836173035))
2	131550000	135540000	2:131550000-135530000	75	0.199874	0.631101	-0.332186	0.00929981	1	1.95992	POLYGON ((0.1519352538830447 0.660495064922876, 0.1630318604446954 0.6707944516497644, 0.1670911752881752 0.6742078020838582, 0.171464903718746 0.6772077183826974, 0.1761110975454941 0.6797654285126209, 0.1809851953767462 0.6818564016152237, 0.1860404500059478 0.6834605832814825, 0.1912283767615721 0.6845625878924991, 0.1964992185209615 0.6851518461821328, 0.2018024229281777 0.6852227066062551, 0…
2	131550000	135540000	2:131550000-135530000	76	0.17768	0.610502	-0.280717	0.0261395	1	1.63281	POLYGON ((0.1492749007811938 0.5601270011442698, 0.1362210842325473 0.5756597572266142, 0.1329059641989537 0.5800371007142917, 0.1300511434087971 0.5847276396068212, 0.1276859706376917 0.5896831531633624, 0.1258347608707282 0.5948526965904883, 0.1245165453340533 0.6001831247763952, 0.1237448758457464 0.6056196386453243, 0.1235276854973484 0.6111063485154381, 0.123867207098296 0.6165868486685931, …
2	131550000	135540000	2:131550000-135530000	77	0.203788	0.579437	-0.586575	0.0473991	1	0.889958	POLYGON ((0.1572411970616117 0.5466706991203146, 0.1552910883648667 0.5529683304264323, 0.1492749007811938 0.5601270011442698, 0.2031041775939781 0.6053654315126649, 0.2107957698604333 0.6059481962221579, 0.2499097207001818 0.5753662014572876, 0.1572411970616117 0.5466706991203146))
2	131550000	135540000	2:131550000-135530000	78	0.214159	0.545943	-3.33298	0.0447791	2	-0.597762	POLYGON ((0.1831876836008587 0.4979793630197972, 0.1718861849839806 0.5120930162855661, 0.1689037124258924 0.5161978986490208, 0.1663185018888508 0.5205638908909651, 0.1641532467627333 0.5251526676360652, 0.1624269540019284 0.5299239478711323, 0.1572411970616117 0.5466706991203146, 0.2499097207001818 0.5753662014572876, 0.2590770150606906 0.5727770423607049, 0.2665323019205624 0.5671809010731207,…
2	131550000	135540000	2:131550000-135530000	79	0.236762	0.517716	-3.33298	0.47679	2	-0.00343766	POLYGON ((0.1850840042800429 0.4956111804049055, 0.1831876836008587 0.4979793630197972, 0.2677342018059453 0.5656799321470062, 0.2776952957988491 0.5532402167137255, 0.2885306885508512 0.5417102512039756, 0.2165566325043564 0.4740719599567967, 0.1850840042800429 0.4956111804049055))
2	131550000	135540000	2:131550000-135530000	80	0.26137	0.491531	-0.992293	0.204916	4	-0.33212	POLYGON ((0.2885306885508512 0.5417102512039756, 0.3008346507290769 0.528617577703793, 0.3042458592589571 0.524614816496322, 0.3072527303224148 0.5203000549355747, 0.3098269076131764 0.5157139833929483, 0.3119441153448448 0.5108998508294094, 0.3182241827929039 0.4945023485357342, 0.2347004134824796 0.4625136410245963, 0.2276332527560997 0.4632747277111389, 0.22037705887558 0.4683384696927947, 0.2…
2	131550000	135540000	2:131550000-135530000	81	0.273931	0.458736	-3.33298	0.159657	3	0.30002	POLYGON ((0.3182241827929039 0.4945023485357342, 0.3245042502409629 0.4781048462420591, 0.3260914394291036 0.4732995246925634, 0.3272231510802839 0.4683670290309758, 0.3278895029100448 0.4633504305866142, 0.3280846762292134 0.4582935350875473, 0.3278069667536139 0.4532405001420755, 0.3270587994861451 0.4482354496475364, 0.3258467075412733 0.4433220884934815, 0.3241812750968475 0.4385433209236941,…
2	131550000	135540000	2:131550000-135530000	82	0.254581	0.428483	-3.33298	0.284634	3	0.145199	POLYGON ((0.2921781293340062 0.4257497115251065, 0.247041165551836 0.4042560509735534, 0.2358863909333197 0.4111473441474561, 0.2276332527560997 0.4632747277111389, 0.2347004134824796 0.4625136410245963, 0.2921781293340062 0.4257497115251065))
2	131550000	135540000	2:131550000-135530000	83	0.270602	0.394838	-0.825282	0.215496	4	-0.275149	POLYGON ((0.2989500002499775 0.4253969632073364, 0.2802149837458602 0.3651561364225121, 0.2687172052613164 0.3639984803112898, 0.2529225357466986 0.3741162690009188, 0.247041165551836 0.4042560509735534, 0.2921781293340062 0.4257497115251065, 0.2989500002499775 0.4253969632073364))
2	131550000	135540000	2:131550000-135530000	84	0.304966	0.384151	-3.33298	0.297914	3	0.1361	POLYGON ((0.3226866185403379 0.4352741563190237, 0.3226775062066492 0.4352542255070713, 0.3267878455121493 0.4337158937687129, 0.3277302247438553 0.4332356269201014, 0.3302018483034118 0.3915831927997728, 0.3015017642593051 0.3531266088096428, 0.2802149837458602 0.3651561364225121, 0.2989500002499775 0.4253969632073364, 0.3226866185403379 0.4352741563190237))
2	131550000	135540000	2:131550000-135530000	85	0.330258	0.365276	-3.33298	0.373073	2	-0.0843336	POLYGON ((0.3547194426311261 0.3626229824211986, 0.353516520527788 0.3412126849545263, 0.3454219733187446 0.3301774025752879, 0.3388663148711913 0.3273202777865711, 0.3078767179671342 0.3421587163382662, 0.3015017642593051 0.3531266088096428, 0.3302018483034118 0.3915831927997728, 0.3547194426311261 0.3626229824211986))
2	131550000	135540000	2:131550000-135530000	86	0.356139	0.387187	-3.33298	0.331153	3	0.16056	POLYGON ((0.3277302247438553 0.4332356269201014, 0.3277508408456195 0.4332251202897643, 0.33017551151687 0.4347137880078374, 0.3351127602864507 0.4370948986944799, 0.3402654158363619 0.4389647260391132, 0.3455806912162827 0.440304114388464, 0.3510041334990372 0.4410993422302805, 0.3564801816296362 0.4413422627648838, 0.3619527356266576 0.4410303873659591, 0.3673657313047175 0.440166911075564, 0.3…
2	131550000	135540000	2:131550000-135530000	87	0.379325	0.362519	-3.33298	0.143797	3	0.396579	POLYGON ((0.4071933678230274 0.4119432162097977, 0.4187861063180832 0.399609201428638, 0.4220125124041882 0.3958451626968085, 0.4248811903156334 0.3918018508305837, 0.427368100305059 0.3875131491025938, 0.4294524018704292 0.3830149971718823, 0.4311166284000854 0.3783450899067263, 0.4323468335443298 0.3735425614986643, 0.4331327080869378 0.3686476575148819, 0.4351978149017308 0.3505155554876508, 0…
2	131550000	135540000	2:131550000-135530000	88	0.383455	0.326255	-0.998508	0.115558	4	-0.540648	POLYGON ((0.4351978149017308 0.3505155554876508, 0.4372629217165237 0.3323834534604196, 0.4375993842380191 0.3273661571421238, 0.4374690257851346 0.3223392817659366, 0.4368729702756713 0.3173461677873062, 0.4358163567503492 0.3124298645794006, 0.4343082950652903 0.3076327592722374, 0.4323617873491299 0.3029962113015071, 0.4299936159019327 0.2985601958179187, 0.4272241985024223 0.2943629590315026,…
2	131550000	135540000	2:131550000-135530000	89	0.360809	0.295176	-3.33298	0.444531	2	-0.053217	POLYGON ((0.4159013443922984 0.2788232642335995, 0.4045784902821745 0.2632835694356963, 0.4012732073862661 0.2591823214412931, 0.3975851315177503 0.2554215733080551, 0.393549152098228 0.2520369019416189, 0.3892034497380118 0.2490603265385773, 0.3845891350452351 0.246520005682936, 0.3797498597170034 0.2444399709641994, 0.3747314035916899 0.2428398996370754, 0.3546501868730552 0.2374979206485249, 0…
2	131550000	135540000	2:131550000-135530000	90	0.320647	0.284492	-3.33298	0.146517	2	-0.321897	POLYGON ((0.3546501868730552 0.2374979206485249, 0.3345689701544206 0.2321559416599745, 0.3294639205588181 0.2310583951228154, 0.3242768991617205 0.2304576049757242, 0.3190561283667032 0.2303591566101461, 0.3138501443368122 0.2307639652752101, 0.3087073457663421 0.2316682675688935, 0.3052189804270869 0.2326356399497526, 0.2869292118848688 0.2442742307466747, 0.2790294510913369 0.2544679006108193,…
2	131550000	135540000	2:131550000-135530000	91	0.3039	0.310229	-0.848052	0.101198	1	0.428076	POLYGON ((0.3348225275158262 0.3120327560398976, 0.2732283106713986 0.2719546771745183, 0.2608129959508214 0.2886752981141102, 0.3078767179671342 0.3421587163382662, 0.3388663148711913 0.3273202777865711, 0.3348225275158262 0.3120327560398976))
2	131550000	135540000	2:131550000-135530000	92	0.276712	0.334154	-1.46172	0.445731	4	-0.0352032	POLYGON ((0.2802149837458602 0.3651561364225121, 0.3015017642593051 0.3531266088096428, 0.3078767179671342 0.3421587163382662, 0.2608129959508214 0.2886752981141102, 0.2450988236674461 0.298240320235213, 0.2418772433739123 0.3019630999545644, 0.2687172052613164 0.3639984803112898, 0.2802149837458602 0.3651561364225121))
2	131550000	135540000	2:131550000-135530000	93	0.24149	0.349392	-0.931805	0.236515	4	-0.231339	POLYGON ((0.1932512918647366 0.3249117951787754, 0.1932572460102919 0.3249131114963619, 0.1923429373401943 0.3266458386041683, 0.190244621548227 0.3318781193410917, 0.1838742058628797 0.350517525255086, 0.2529225357466986 0.3741162690009188, 0.2687172052613164 0.3639984803112898, 0.2418772433739123 0.3019630999545644, 0.1932512918647366 0.3249117951787754))
2	131550000	135540000	2:131550000-135530000	94	0.228749	0.386671	-3.33298	0.428411	2	-0.0444925	POLYGON ((0.1838742058628797 0.350517525255086, 0.1783571766701325 0.3666599799459945, 0.1714501347122637 0.3818526005612786, 0.2358863909333197 0.4111473441474561, 0.247041165551836 0.4042560509735534, 0.2529225357466986 0.3741162690009188, 0.1838742058628797 0.350517525255086))
2	131550000	135540000	2:131550000-135530000	95	0.212751	0.421861	-3.33298	0.295134	3	0.127981	POLYGON ((0.1714501347122637 0.3818526005612786, 0.1704793055115473 0.383988021168058, 0.1702954320070955 0.3840973345602204, 0.22037705887558 0.4683384696927947, 0.2276332527560997 0.4632747277111389, 0.2358863909333197 0.4111473441474561, 0.1714501347122637 0.3818526005612786))
2	131550000	135540000	2:131550000-135530000	96	0.183189	0.439436	-3.33298	0.252375	3	0.17171	POLYGON ((0.1713544849039889 0.4945961095408677, 0.1867967300138363 0.4934722767103089, 0.1850840042800429 0.4956111804049055, 0.2165566325043564 0.4740719599567967, 0.22037705887558 0.4683384696927947, 0.1702954320070955 0.3840973345602204, 0.166505259009296 0.3863506046466701, 0.1634927096903318 0.3865698474966733, 0.1713544849039889 0.4945961095408677))
2	131550000	135540000	2:131550000-135530000	97	0.151658	0.44173	-3.33298	0.162937	3	0.257142	POLYGON ((0.1497605797994768 0.4982955147749613, 0.1606972333752638 0.4953717071995182, 0.1713544849039889 0.4945961095408677, 0.1634927096903318 0.3865698474966733, 0.1520424092650074 0.3874031604926919, 0.1300669605322518 0.4246305125401829, 0.1497605797994768 0.4982955147749613))
2	131550000	135540000	2:131550000-135530000	98	0.119889	0.450223	-1.49559	0.109318	4	-0.267227	POLYGON ((0.09828368053804229 0.5021112423853327, 0.09943543703765879 0.5003234124846062, 0.1032416692827176 0.5017572473070879, 0.1082376078052567 0.5031111885726443, 0.1133399866631938 0.5039819862883304, 0.1185021942523374 0.5043616854826347, 0.1236770724169334 0.5042468175012202, 0.1288173472521107 0.5036384316940141, 0.1338760609637259 0.5025420858291145, 0.1497605797994768 0.498295514774961…
2	131550000	135540000	2:131550000-135530000	99	0.104663	0.413989	-1.31819	0.113558	4	-0.275991	POLYGON ((0.1502229245859674 0.3848119293191807, 0.1502349578113062 0.3848016657982855, 0.1244203882836244 0.380576118996546, 0.08457564393581914 0.3923129396091337, 0.09072355993335474 0.4411628027604274, 0.1300669605322518 0.4246305125401829, 0.1520424092650074 0.3874031604926919, 0.151813224754238 0.3874198397433855, 0.1502229245859674 0.3848119293191807))
2	131550000	135540000	2:131550000-135530000	100	0.0704853	0.41829	-0.506745	0.177636	1	0.364469	POLYGON ((0.09072355993335474 0.4411628027604274, 0.08457564393581914 0.3923129396091337, 0.07095881899839561 0.3875615583292331, 0.05549070133067094 0.391847170294353, 0.0458968676650864 0.4334455616173929, 0.09025466004444782 0.4418882418218423, 0.09072355993335474 0.4411628027604274))
2	131550000	135540000	2:131550000-135530000	101	0.0631988	0.456574	-3.33298	0.0969781	2	-0.320093	POLYGON ((0.09659651296450572 0.4985034833270869, 0.09025466004444782 0.4418882418218423, 0.0458968676650864 0.4334455616173929, 0.02774205767165924 0.4459646143472019, 0.02603924205999383 0.4530490498116543, 0.09659651296450572 0.4985034833270869))
2	131550000	135540000	2:131550000-135530000	102	0.0446107	0.485427	-3.33298	0.0889382	2	-0.363895	POLYGON ((0.08467371541121391 0.5260762255706837, 0.09161618052464585 0.5124609611765992, 0.09828368053804229 0.5021112423853327, 0.09659651296450572 0.4985034833270869, 0.02603924205999383 0.4530490498116543, 0.01600160455712323 0.464642025367114, 0.02350858601635203 0.494887938315177, 0.08467371541121391 0.5260762255706837))
2	131550000	135540000	2:131550000-135530000	103	0.0282448	0.517523	-0.0594952	0.349773	1	0.222788	POLYGON ((-0.00918323914153895 0.5597840388905638, -0.008135172572622846 0.5578968834030298, -0.00451725148279955 0.5606456025089194, -0.0001793478247723301 0.563620524238739, 0.004426698471305297 0.566160584270169, 0.009257435739368158 0.5682418206555484, 0.01426729266529402 0.56984459981271, 0.0194090081891224 0.5709538017406297, 0.02463407734768491 0.5715589626556908, 0.02989320885173882 0.571…
2	131550000	135540000	2:131550000-135530000	104	0.000431843	0.496393	-0.448751	0.0563989	1	0.635861	POLYGON ((-0.02640832111867587 0.4982265685656406, -0.009733015954295491 0.5386412241898328, 0.02350858601635203 0.494887938315177, 0.01600160455712323 0.464642025367114, 0.001898686847577427 0.4668886753604038, -0.02640832111867587 0.4982265685656406))
2	131550000	135540000	2:131550000-135530000	105	-0.0273045	0.471339	-3.33298	0.0256595	2	-0.419122	POLYGON ((-0.0491473783951633 0.4603383330948366, -0.03877723476836585 0.4928282009241827, -0.02640832111867587 0.4982265685656406, 0.001898686847577427 0.4668886753604038, -0.0361241719645327 0.4447647298961151, -0.03622136530214379 0.4447866324221446, -0.0491473783951633 0.4603383330948366))
2	131550000	135540000	2:131550000-135530000	106	-0.0605782	0.481959	-1.02625	0.0137397	1	0.638848	POLYGON ((-0.0805049963815947 0.4629166783004638, -0.08883545573487039 0.4754977682562426, -0.0872201496419117 0.4899575295096802, -0.06368835400571374 0.5030044453740316, -0.03877723476836585 0.4928282009241827, -0.0491473783951633 0.4603383330948366, -0.0805049963815947 0.4629166783004638))
2	131550000	135540000	2:131550000-135530000	107	-0.0467325	0.515853	-3.33298	0.00799984	2	-0.626241	POLYGON ((-0.03877723476836585 0.4928282009241827, -0.06368835400571374 0.5030044453740316, -0.06299589269472498 0.5274735432175539, -0.01013828020606292 0.5568289921607027, -0.009733015954295491 0.5386412241898328, -0.02640832111867587 0.4982265685656406, -0.03877723476836585 0.4928282009241827))
2	131550000	135540000	2:131550000-135530000	108	-0.0642649	0.547422	-0.696366	0.115978	1	0.57906	POLYGON ((-0.1092675745806594 0.5774757617626995, -0.1067689938955198 0.5809816154739098, -0.1032696282240216 0.5849915966469359, -0.0993935565928641 0.5886387294688962, -0.09517821390192653 0.5918877901191214, -0.09066431171348328 0.5947073993374442, -0.08589544506203539 0.5970703254834741, -0.08091767141571618 0.5989537475383766, -0.07577906585563959 0.6003394755090958, -0.07052925676924666 0.6…
2	131550000	135540000	2:131550000-135530000	109	-0.0798904	0.516791	-3.33298	0.00677986	2	-0.675093	POLYGON ((-0.1006358198362929 0.506323571505193, -0.09352567509875963 0.5430477198907592, -0.06299589269472498 0.5274735432175539, -0.06368835400571374 0.5030044453740316, -0.0872201496419117 0.4899575295096802, -0.1006358198362929 0.506323571505193))
2	131550000	135540000	2:131550000-135530000	110	-0.115975	0.523778	-0.733017	0.152437	1	0.552776	POLYGON ((-0.1696074290739359 0.5043842862714519, -0.1701099150914472 0.5222554424294932, -0.1699935458158249 0.5276379262832407, -0.1693433307500885 0.5329822592268779, -0.1681656957742063 0.5382356248250194, -0.1664722791005181 0.5433461056451998, -0.164279816256782 0.5482631963422476, -0.1616099746939864 0.5529383027874236, -0.1584891396534477 0.557325222309583, -0.1549481534094042 0.561380600…
2	131550000	135540000	2:131550000-135530000	111	-0.11497	0.488035	-0.903912	0.375272	1	0.123553	POLYGON ((-0.1628812470307482 0.456683913993419, -0.1674585493442239 0.474698828272387, -0.1686080177490573 0.4805605112986862, -0.1691049430564246 0.4865131301134106, -0.1696074290739359 0.5043842862714519, -0.1006358198362929 0.506323571505193, -0.0872201496419117 0.4899575295096802, -0.08883545573487039 0.4754977682562426, -0.1628812470307482 0.456683913993419))
2	131550000	135540000	2:131550000-135530000	112	-0.105816	0.452005	-1.29639	0.0944581	1	0.38187	POLYGON ((-0.1518193648476204 0.41897535559934, -0.157122265532246 0.4346701319181489, -0.1583039447172724 0.4386689997144511, -0.1628812470307482 0.456683913993419, -0.08883545573487039 0.4754977682562426, -0.0805049963815947 0.4629166783004638, -0.0863028137660487 0.4411118777470566, -0.1518193648476204 0.41897535559934))
2	131550000	135540000	2:131550000-135530000	113	-0.09521	0.420616	-3.33298	0.0128397	2	-0.735864	POLYGON ((-0.07041122410328092 0.3724814636991895, -0.07494472092005347 0.3703944431607125, -0.07984118581307917 0.3686863758792189, -0.08487857412390803 0.3674544743845097, -0.09001069567674598 0.3667100345591118, -0.09519049164227607 0.3664598825209025, -0.1003704660421337 0.3667063120312334, -0.1055031212618061 0.3674470634623567, -0.110541393578535 0.368675344517012, -0.1154390847106616 0.370…
2	131550000	135540000	2:131550000-135530000	114	-0.0639563	0.440875	-0.90527	0.0941581	1	0.423955	POLYGON ((-0.0863028137660487 0.4411118777470566, -0.0805049963815947 0.4629166783004638, -0.0491473783951633 0.4603383330948366, -0.03622136530214379 0.4447866324221446, -0.06779074325490353 0.4125535786705907, -0.0863028137660487 0.4411118777470566))
2	131550000	135540000	2:131550000-135530000	115	-0.0395551	0.416976	-0.208992	0.0295194	1	1.01442	POLYGON ((-0.03889830986158695 0.3628556393011279, -0.0435918943328872 0.3629710400993729, -0.04896621017988262 0.3636443702107169, -0.05424638929647414 0.3648511646251967, -0.05937961559268486 0.3665793521306484, -0.06431454290469234 0.3688116461720577, -0.06900180859551303 0.3715257177639218, -0.07035965449629746 0.3725052040553176, -0.07041122410328092 0.3724814636991895, -0.06779074325490353 …
2	131550000	135540000	2:131550000-135530000	116	-0.00866306	0.439301	-0.540722	0.049579	1	0.629522	POLYGON ((0.001898686847577427 0.4668886753604038, 0.01600160455712323 0.464642025367114, 0.02603924205999383 0.4530490498116543, 0.02774205767165924 0.4459646143472019, 0.01066654933888995 0.4238967197685486, -0.01769005155381288 0.4192562722655946, -0.0361241719645327 0.4447647298961151, 0.001898686847577427 0.4668886753604038))
2	131550000	135540000	2:131550000-135530000	117	-0.00274456	0.403135	-0.964796	0.0279994	1	0.576237	POLYGON ((-0.02445438987334298 0.3535352152552715, -0.02472279644224712 0.3536388123699123, -0.02951054782979454 0.3560553314198415, -0.03403581004952547 0.3589335477964034, -0.03825420467320773 0.3622452353520949, -0.03889029395115752 0.3628554422145583, -0.03889830986158695 0.3628556393011279, -0.01769005155381288 0.4192562722655946, 0.01066654933888995 0.4238967197685486, 0.01587930257396284 0…
2	131550000	135540000	2:131550000-135530000	118	0.0304294	0.409052	-3.33298	0.00689986	2	-0.56035	POLYGON ((0.04953819033910279 0.3888068255888761, 0.01587930257396284 0.394675155909221, 0.01066654933888995 0.4238967197685486, 0.02774205767165924 0.4459646143472019, 0.0458968676650864 0.4334455616173929, 0.05549070133067094 0.391847170294353, 0.04953819033910279 0.3888068255888761))
2	131550000	135540000	2:131550000-135530000	119	0.0247056	0.376222	-0.485578	0.0553989	1	0.834766	POLYGON ((0.01583004675666265 0.3202393295426955, 0.0008132451236389122 0.3276216686214634, -0.003871605008769735 0.3302200214606473, -0.008276816293932791 0.3332685246627276, -0.0123592820521663 0.3367373474562516, -0.01607905379238329 0.3405925460815761, -0.01939973212338003 0.3447963959435562, -0.02228882293582047 0.3493077607611578, -0.02443600701631283 0.3535281200081061, -0.0244543898733429…
2	131550000	135540000	2:131550000-135530000	120	0.0547392	0.361458	-0.611775	0.409612	1	0.0888167	POLYGON ((0.04248668034902744 0.3087599841660326, 0.04112416183925359 0.3090410577988051, 0.03588869847543267 0.3106882983113121, 0.03084684838968643 0.3128569904639275, 0.01583004675666265 0.3202393295426955, 0.04953819033910279 0.3888068255888761, 0.05549070133067094 0.391847170294353, 0.07095881899839561 0.3875615583292331, 0.07366770237075582 0.3334694001760243, 0.04248668034902744 0.30875998…
2	131550000	135540000	2:131550000-135530000	121	0.0897053	0.363209	-3.33298	0.304694	2	-0.124566	POLYGON ((0.08954453765079762 0.3354727069162348, 0.07366770237075582 0.3334694001760243, 0.07095881899839561 0.3875615583292331, 0.08457564393581914 0.3923129396091337, 0.1244203882836244 0.380576118996546, 0.08954453765079762 0.3354727069162348))
2	131550000	135540000	2:131550000-135530000	122	0.116348	0.342608	-3.33298	0.48911	3	0.0108373	POLYGON ((0.1502349578113062 0.3848016657982855, 0.1534275886719455 0.382078569319481, 0.1570390125923791 0.3783440054889669, 0.1602759791536689 0.3742805836282248, 0.1631087005995737 0.3699256968389758, 0.1655111091860089 0.3653194203903585, 0.1674610970660106 0.3605041429315706, 0.1689407197342699 0.3555241764159364, 0.1699363611590683 0.350425348326023, 0.170438859082006 0.3452545799522987, 0.…
2	131550000	135540000	2:131550000-135530000	123	0.0965899	0.308646	-3.33298	0.160297	3	0.291217	POLYGON ((0.05958504843632281 0.2673764071228824, 0.06146474185888556 0.2675070455533904, 0.05973189961364725 0.2689677350990186, 0.05608517536075305 0.2726982083048151, 0.05281430711406968 0.276762251738226, 0.0499496462922487 0.2811221538577392, 0.04751777498705915 0.2857374577557298, 0.04554125929976953 0.2905653365708732, 0.04403843994317289 0.2955609908921059, 0.04302326205232502 0.300678064…
2	131550000	135540000	2:131550000-135530000	124	0.127709	0.293249	-3.33298	0.417532	3	0.0686491	POLYGON ((0.1686304205194146 0.3286547646130105, 0.171092582960444 0.3256632593582066, 0.1739415731860846 0.3214512475582478, 0.1747313626615774 0.3200082152712137, 0.1767163583771781 0.3205467904011079, 0.1755828185044105 0.3164008307020333, 0.1529454491999347 0.2824832123995562, 0.0952351245425119 0.2667627616408341, 0.1203612894260122 0.3175446881950968, 0.1686304205194146 0.3286547646130105))
2	131550000	135540000	2:131550000-135530000	125	0.136655	0.260405	-3.33298	0.144317	3	0.308827	POLYGON ((0.1574291344063655 0.2269997060902078, 0.1573927479014874 0.226984673301157, 0.1187075672339649 0.2322623912782214, 0.08971460486762438 0.2621777969307761, 0.0952351245425119 0.2667627616408341, 0.1529454491999347 0.2824832123995562, 0.1574291344063655 0.2269997060902078))
2	131550000	135540000	2:131550000-135530000	126	0.172569	0.263308	-3.33298	0.419272	2	-0.0437919	POLYGON ((0.1940986605550294 0.2239149710775982, 0.1574291344063655 0.2269997060902078, 0.1529454491999347 0.2824832123995562, 0.1755828185044105 0.3164008307020333, 0.1966766007075024 0.2386566777048866, 0.1940986605550294 0.2239149710775982))
2	131550000	135540000	2:131550000-135530000	127	0.205018	0.272112	0	0.367573	4	-0.213068	POLYGON ((0.1767163583771781 0.3205467904011079, 0.1908371474673916 0.324378086236509, 0.1932512918647366 0.3249117951787754, 0.2418772433739123 0.3019630999545644, 0.2450988236674461 0.298240320235213, 0.1966766007075024 0.2386566777048866, 0.1755828185044105 0.3164008307020333, 0.1767163583771781 0.3205467904011079))
2	131550000	135540000	2:131550000-135530000	128	0.227719	0.253663	-3.33298	0.00773985	2	-0.632565	POLYGON ((0.2732283106713986 0.2719546771745183, 0.2790294510913369 0.2544679006108193, 0.1947806420055832 0.2232703781215552, 0.1940986605550294 0.2239149710775982, 0.1966766007075024 0.2386566777048866, 0.2450988236674461 0.298240320235213, 0.2608129959508214 0.2886752981141102, 0.2732283106713986 0.2719546771745183))
2	131550000	135540000	2:131550000-135530000	129	0.23957	0.22166	-1.09579	0.0130797	1	0.660002	POLYGON ((0.2397590128083228 0.1966410800282609, 0.2201724435477874 0.1945645707303998, 0.2007348343907955 0.2100435725016018, 0.1947806420055832 0.2232703781215552, 0.2790294510913369 0.2544679006108193, 0.2869292118848688 0.2442742307466747, 0.2397590128083228 0.1966410800282609))
2	131550000	135540000	2:131550000-135530000	130	0.264778	0.196696	-0.242325	0.0110998	1	1.36997	POLYGON ((0.3052189804270869 0.2326356399497526, 0.3052083058780093 0.2326386001511511, 0.306473616616669 0.2312561616474866, 0.3096605334144131 0.2270025706882713, 0.3124151452718666 0.2224570687095194, 0.3147109197028539 0.2176634380931612, 0.3165257437540787 0.2126678512019984, 0.3178421369976107 0.2075184256464199, 0.3186474199027778 0.2022647608144472, 0.3189338359657043 0.1969574601292627, …
2	131550000	135540000	2:131550000-135530000	131	0.24482	0.172139	-0.540623	0.0179796	1	1.14586	POLYGON ((0.2201724435477874 0.1945645707303998, 0.2397590128083228 0.1966410800282609, 0.2706360863440691 0.1715464550942102, 0.2463682184000989 0.1507463350872169, 0.2218069060035788 0.1645653282477186, 0.2201724435477874 0.1945645707303998))
2	131550000	135540000	2:131550000-135530000	132	0.267272	0.145944	-0.761056	9.9998e-05	1	1.8734	POLYGON ((0.3137376726042503 0.1736640268893299, 0.3144661464250005 0.1725063067453672, 0.3168382233877028 0.1677622689607022, 0.3187348513575615 0.1628089422035356, 0.3201378375216962 0.1576938397175086, 0.3210337241724469 0.152466026529538, 0.3214139177962423 0.1471756488088324, 0.3212747715042005 0.1418734528553879, 0.3206176200137751 0.1366102983319158, 0.3194487668458933 0.1314366704083746, …
2	131550000	135540000	2:131550000-135530000	133	0.22728	0.140965	-0.359908	0.00441991	1	1.65938	POLYGON ((0.2539670211273384 0.08971298486918163, 0.2339711926379998 0.08722345487426256, 0.2285734851216324 0.08682398227052848, 0.2231628606650506 0.08696528967734922, 0.2177933630153894 0.08764596565288038, 0.2125186251267648 0.08885921129976773, 0.2073913334502405 0.09059290817558771, 0.2024627016778916 0.0928297393372929, 0.1977819591974463 0.09554736231061689, 0.1933958593670516 0.098718632…
2	131550000	135540000	2:131550000-135530000	134	0.198107	0.169594	-0.0932269	0.0417792	1	1.03405	POLYGON ((0.1747617090342715 0.116626455080454, 0.1647540052920951 0.1264475952670085, 0.154347775704243 0.132687779257835, 0.2007348343907955 0.2100435725016018, 0.2201724435477874 0.1945645707303998, 0.2218069060035788 0.1645653282477186, 0.1747617090342715 0.116626455080454))
2	131550000	135540000	2:131550000-135530000	135	0.166291	0.188673	-3.33298	0.142437	2	-0.300986	POLYGON ((0.154347775704243 0.132687779257835, 0.1440636411688447 0.1388547479130541, 0.1314148850399534 0.1427558800484696, 0.1573927479014874 0.226984673301157, 0.1574291344063655 0.2269997060902078, 0.1940986605550294 0.2239149710775982, 0.1947806420055832 0.2232703781215552, 0.2007348343907955 0.2100435725016018, 0.154347775704243 0.132687779257835))
2	131550000	135540000	2:131550000-135530000	136	0.128461	0.20034	-1.32576	0.183816	4	-0.322693	POLYGON ((0.1314148850399534 0.1427558800484696, 0.1124997079924632 0.1485897030959778, 0.1089301946947817 0.1498285455777438, 0.08970808780848184 0.1572608027336347, 0.1187075672339649 0.2322623912782214, 0.1573927479014874 0.226984673301157, 0.1314148850399534 0.1427558800484696))
2	131550000	135540000	2:131550000-135530000	137	0.0900164	0.215205	-3.33298	0.00771985	3	0.581275	POLYGON ((0.08970808780848184 0.1572608027336347, 0.08173722521138536 0.1603427490013519, 0.07684300256592413 0.1600026012106083, 0.07430749207432824 0.1631618918152145, 0.06731639036010571 0.2637534854036052, 0.08971460486762438 0.2621777969307761, 0.1187075672339649 0.2322623912782214, 0.08970808780848184 0.1572608027336347))
2	131550000	135540000	2:131550000-135530000	138	0.0515504	0.212531	-3.33298	0.0357393	3	0.521583	POLYGON ((0.0114099361781564 0.2531785445365247, 0.02774024850507592 0.2611723725608764, 0.03253545697936548 0.2632393844429917, 0.03750744549346266 0.2648349698052929, 0.04260999003267166 0.2659442946711879, 0.04779565281770203 0.2665570457729047, 0.05958504843632281 0.2673764071228824, 0.06731639036010571 0.2637534854036052, 0.07430749207432824 0.1631618918152145, 0.04785196539033704 0.17873239…
2	131550000	135540000	2:131550000-135530000	139	0.0188898	0.196544	-3.33298	1.99996e-05	3	0.720556	POLYGON ((-0.03463388238735834 0.176071287270931, -0.0352380156347603 0.1947974922045169, -0.03515736407613378 0.199975031873196, -0.03458259262519763 0.2051212012712862, -0.03351895606250471 0.2101889521488604, -0.03197617856053409 0.2151319531881142, -0.02996836478158506 0.2199050135820034, -0.02751387092755702 0.2244644961858949, -0.02463513692052723 0.228768716465042, -0.02135848124839614 0.2…
2	131550000	135540000	2:131550000-135530000	140	0.0200981	0.159091	-3.33298	0.0290994	3	0.720556	POLYGON ((-0.02583656764446666 0.1247074765294122, -0.03154460527033993 0.142784749953465, -0.03281508423717816 0.1475557988167269, -0.03364576697827779 0.1524227270311606, -0.03402974913995639 0.1573450823373451, -0.03463388238735834 0.176071287270931, 0.04785196539033704 0.1787323947008335, 0.07430749207432824 0.1631618918152145, 0.07684300256592413 0.1600026012106083, 0.07660710378126025 0.159…
2	131550000	135540000	2:131550000-135530000	141	0.0315141	0.122937	-3.33298	0.0381992	3	0.511582	POLYGON ((-0.02431293058715999 0.1198821397868679, -0.02583656764446666 0.1247074765294122, 0.07744878377004503 0.1573206178060794, 0.0831568213959183 0.1392433443820267, 0.08435864939451398 0.1347828122490332, 0.08517595963331687 0.1302360835985391, 0.08778770120294246 0.1110355299889779, -0.01132780634654716 0.09755341397683136, -0.02431293058715999 0.1198821397868679))
2	131550000	135540000	2:131550000-135530000	142	0.0367376	0.0845357	-3.33298	0.101478	3	0.441924	POLYGON ((0.08778770120294246 0.1110355299889779, 0.09039944277256806 0.09183497637941671, 0.09086447228936466 0.08631190330139356, 0.09076254575940554 0.08077022488604262, 0.09009473082046135 0.07526798789696271, 0.08886802255470455 0.06986282596530885, 0.08709527021814932 0.06461135590161107, 0.08065838459089539 0.04834246789734113, -0.008961385705689072 0.08380108136794083, -0.0097419006971892…
2	131550000	135540000	2:131550000-135530000	143	0.0238639	0.0519979	-3.33298	0.104018	3	0.441924	POLYGON ((0.08065838459089539 0.04834246789734113, 0.07422149896364144 0.03207357989307118, 0.07183633412999682 0.02686799411323834, 0.06891487551641992 0.02194334040317809, 0.06548978268512752 0.01735467243830177, 0.06159934542461833 0.01315328784308859, 0.0482340403755286 0.0001695971472641965, -0.005038103742725644 0.0550075067555484, -0.008961385705689072 0.08380108136794083, 0.08065838459089…
2	131550000	135540000	2:131550000-135530000	144	-0.00286675	0.0260305	-3.33298	0.0237395	3	0.534801	POLYGON ((0.0482340403755286 0.0001695971472641965, 0.03486873532643886 -0.01281409354856021, 0.03100901338763746 -0.01622233319462988, 0.02713545794456552 -0.01903618820847913, 0.02738942778159383 -0.01942200846010387, -0.02910442787200652 -0.00411429034837284, -0.0351178561429145 0.007104179327975347, -0.005038103742725644 0.0550075067555484, 0.0482340403755286 0.0001695971472641965))
2	131550000	135540000	2:131550000-135530000	145	-0.0320813	0.0443751	-0.92371	1.99996e-05	4	-0.951232	POLYGON ((-0.0351178561429145 0.007104179327975347, -0.05600699078787174 0.0213748462300415, -0.06535108081863847 0.04123781764881263, -0.009741900697189283 0.08513856558675477, -0.008961385705689072 0.08380108136794083, -0.005038103742725644 0.0550075067555484, -0.0351178561429145 0.007104179327975347))
2	131550000	135540000	2:131550000-135530000	146	-0.0545773	0.0728709	-3.33298	0.0145797	3	0.553377	POLYGON ((-0.06214526091120456 0.1287595085648039, -0.04657196382843429 0.1264318922012144, -0.04156580553752216 0.1254405333457411, -0.03667519168936512 0.1239823463199421, -0.03194355181177636 0.1220702800860461, -0.02741290371520784 0.1197213141350255, -0.02345695164046625 0.1171712667200057, -0.02431293058715999 0.1198821397868679, -0.01132780634654716 0.09755341397683136, -0.0097419006971892…
2	131550000	135540000	2:131550000-135530000	147	-0.0857239	0.0775261	-3.33298	0.330353	3	0.162206	POLYGON ((-0.1404669872286371 0.08886673290342192, -0.1343677219427648 0.1013304705233342, -0.1318269635898214 0.105940478218705, -0.128850657018979 0.1102820474230122, -0.1254669202094266 0.114314162148948, -0.1217077202448389 0.117998729909985, -0.1176085713116264 0.121300941590476, -0.1132081991867389 0.1241896002968554, -0.1085481753846983 0.126637416083193, -0.103672524420173 0.1286212637667…
2	131550000	135540000	2:131550000-135530000	148	-0.0979224	0.0525986	-3.33298	0.430451	2	-0.0412509	POLYGON ((-0.1422488557749965 0.08522551695460262, -0.1404669872286371 0.08886673290342192, -0.0730394253673094 0.05587032364695858, -0.06654290299200979 0.04197977490572937, -0.1194157063601104 0.02846821577273306, -0.1444129692550135 0.07224190015908044, -0.1422488557749965 0.08522551695460262))
2	131550000	135540000	2:131550000-135530000	149	-0.0889806	0.017608	-3.33298	0.226855	3	0.161897	POLYGON ((-0.1194157063601104 0.02846821577273306, -0.06654290299200979 0.04197977490572937, -0.06535108081863847 0.04123781764881263, -0.05600699078787174 0.0213748462300415, -0.1033026125610275 -0.01424434543921904, -0.1139556904700675 -0.006974474602259015, -0.1210431344609914 0.006538649610463618, -0.1194157063601104 0.02846821577273306))
2	131550000	135540000	2:131550000-135530000	150	-0.0687337	-0.00927611	-3.33298	0.102418	3	0.278307	POLYGON ((-0.09294158509130385 -0.03468112928107451, -0.1033026125610275 -0.01424434543921904, -0.05600699078787174 0.0213748462300415, -0.0351178561429145 0.007104179327975347, -0.02910442787200652 -0.00411429034837284, -0.03969470744413683 -0.0187267685606729, -0.09294158509130385 -0.03468112928107451))
2	131550000	135540000	2:131550000-135530000	151	-0.0587523	-0.0425886	-3.33298	0.293214	3	0.130143	POLYGON ((-0.06199969057668074 -0.06717633616008935, -0.09306516590332481 -0.03719139581072165, -0.09294158509130385 -0.03468112928107451, -0.03969470744413683 -0.0187267685606729, -0.04072495523762709 -0.06689401760659609, -0.06199969057668074 -0.06717633616008935))
2	131550000	135540000	2:131550000-135530000	152	-0.0216748	-0.0433817	-3.33298	0.047979	3	0.42152	POLYGON ((0.02738942778159383 -0.01942200846010387, 0.03225540562157751 -0.0268141965112135, -0.03155643488375399 -0.0688189452649882, -0.03915880035402391 -0.06807545944195645, -0.04072495523762709 -0.06689401760659609, -0.03969470744413683 -0.0187267685606729, -0.02910442787200652 -0.00411429034837284, 0.02738942778159383 -0.01942200846010387))
2	131550000	135540000	2:131550000-135530000	153	-0.00428485	-0.0697998	-3.33298	0.0326993	3	0.532188	POLYGON ((0.03225540562157751 -0.0268141965112135, 0.0409504054491565 -0.04002327307167014, 0.04369277706235904 -0.04467974282300292, 0.04595742361475339 -0.04958633926072883, 0.04772179546155254 -0.05469420619284432, 0.04896832431671402 -0.05995248332734628, 0.04968459818470106 -0.06530881270071524, 0.04986348494978628 -0.07070986001908357, 0.04950320339228859 -0.07610184572096587, 0.04860734092…
2	131550000	135540000	2:131550000-135530000	154	-0.0267903	-0.0956887	-3.33298	0.0545389	3	0.500794	POLYGON ((0.02533402560882274 -0.1182742907593785, 0.0140812974069966 -0.1312187537451301, 0.01039749898071629 -0.1350579785554003, 0.006354739085867516 -0.1385171851728, 0.001992041135536231 -0.1415629830294271, -0.002648483201834934 -0.144165972054284, -0.007522040492338764 -0.1463010264623581, -0.01258158791268322 -0.1479475372854459, -0.01777828733887692 -0.1490896113036503, -0.02306197676435…
2	131550000	135540000	2:131550000-135530000	155	-0.058101	-0.0916692	-1.43274	0.051339	4	-0.345856	POLYGON ((-0.04934131059362985 -0.1473941595179987, -0.06499664972531377 -0.1453844108602415, -0.07027666168543137 -0.1444387639363769, -0.07543722476778709 -0.1429754242367082, -0.0804277115299 -0.1410087477811682, -0.08223457821707095 -0.1400807025277012, -0.0822382471214626 -0.1401065530498915, -0.09553655003124614 -0.1138443664447943, -0.06199969057668074 -0.06717633616008935, -0.040724955237…
2	131550000	135540000	2:131550000-135530000	156	-0.0864571	-0.0712918	-3.33298	0.131437	3	0.258742	POLYGON ((-0.06199969057668074 -0.06717633616008935, -0.09553655003124614 -0.1138443664447943, -0.1060179165985625 -0.1052083616095625, -0.1017701160382432 -0.04838734373534724, -0.09306516590332481 -0.03719139581072165, -0.06199969057668074 -0.06717633616008935))
2	131550000	135540000	2:131550000-135530000	157	-0.120318	-0.0687604	-3.33298	0.0918782	3	0.291729	POLYGON ((-0.1170250126335149 -0.10250714273634, -0.1508871171971227 -0.07091554982246842, -0.1535985362817447 -0.06140011275234376, -0.1017701160382432 -0.04838734373534724, -0.1060179165985625 -0.1052083616095625, -0.1170250126335149 -0.10250714273634))
2	131550000	135540000	2:131550000-135530000	158	-0.127742	-0.0391922	-1.09287	0.0542389	4	-0.379794	POLYGON ((-0.1535985362817447 -0.06140011275234376, -0.1643831575574395 -0.04961835193987513, -0.1648814992111604 -0.04794888580332601, -0.1139556904700675 -0.006974474602259015, -0.1033026125610275 -0.01424434543921904, -0.09294158509130385 -0.03468112928107451, -0.09306516590332481 -0.03719139581072165, -0.1017701160382432 -0.04838734373534724, -0.1535985362817447 -0.06140011275234376))
2	131550000	135540000	2:131550000-135530000	159	-0.148378	-0.0135449	-0.959856	0.0913582	4	-0.365295	POLYGON ((-0.1901584612776352 -0.02004637167603944, -0.1664693474690739 0.003055065807659643, -0.1210431344609914 0.006538649610463618, -0.1139556904700675 -0.006974474602259015, -0.1648814992111604 -0.04794888580332601, -0.1901584612776352 -0.02004637167603944))
2	131550000	135540000	2:131550000-135530000	160	-0.15112	0.0222195	-3.33298	0.190216	3	0.204549	POLYGON ((-0.1444129692550135 0.07224190015908044, -0.1194157063601104 0.02846821577273306, -0.1210431344609914 0.006538649610463618, -0.1664693474690739 0.003055065807659643, -0.1674686891891093 0.05061317865499543, -0.1444129692550135 0.07224190015908044))
2	131550000	135540000	2:131550000-135530000	161	-0.18261	0.0215578	-0.697638	0.179556	4	-0.308927	POLYGON ((-0.1674686891891093 0.05061317865499543, -0.1664693474690739 0.003055065807659643, -0.1901584612776352 -0.02004637167603944, -0.1977520441843819 -0.0183780874175722, -0.2241687186222899 0.001532285850107677, -0.1769439917946188 0.04817282628788215, -0.1674686891891093 0.05061317865499543))
2	131550000	135540000	2:131550000-135530000	162	-0.203627	0.0428388	-3.33298	0.398272	2	-0.0550651	POLYGON ((-0.1769439917946188 0.04817282628788215, -0.2241687186222899 0.001532285850107677, -0.2287754107529485 0.003037057884648895, -0.2334308071935716 0.02631500196981411, -0.2183257374310838 0.06233802816655387, -0.1769439917946188 0.04817282628788215))
2	131550000	135540000	2:131550000-135530000	163	-0.194761	0.0687398	-0.914307	0.49589	4	-0.00791377	POLYGON ((-0.1643111664674647 0.1168348005482939, -0.1531056909900135 0.1033471669408771, -0.1497891757136474 0.09891209416453459, -0.1469429367951761 0.09416150808187035, -0.1445967374718394 0.08914508576661437, -0.1428228973320349 0.08405247347895232, -0.1422488557749965 0.08522551695460262, -0.1444129692550135 0.07224190015908044, -0.1674686891891093 0.05061317865499543, -0.1769439917946188 0.…
2	131550000	135540000	2:131550000-135530000	164	-0.217172	0.095715	-3.33298	0.129597	2	-0.28812	POLYGON ((-0.1953393952563715 0.1453267167729768, -0.1953364325736942 0.1452737232817804, -0.195307000695538 0.1452607345025059, -0.1908292578641458 0.1430321712371367, -0.1865762152290482 0.140400004176352, -0.182584150217643 0.1373866850700255, -0.1788871141811728 0.134017916803006, -0.175516641944916 0.1303224341557108, -0.1643111664674647 0.1168348005482939, -0.2199805104020481 0.070584918140…
2	131550000	135540000	2:131550000-135530000	165	-0.247556	0.109124	-0.751955	0.429651	1	0.0477938	POLYGON ((-0.220903069927681 0.1283896361656969, -0.2402176605563111 0.08462380829188962, -0.2497715995036342 0.08366396122613549, -0.2694657314975791 0.0937388986440159, -0.2770310165202212 0.1252517169358416, -0.220903069927681 0.1283896361656969))
2	131550000	135540000	2:131550000-135530000	166	-0.249537	0.144565	-1.73644	0.159397	1	0.163317	POLYGON ((-0.2332583717695053 0.1985581799181803, -0.2200618936169328 0.1899965543126518, -0.2159301167741698 0.1870312862070815, -0.2120947152280849 0.1836915122930877, -0.208589512616649 0.1800066853678322, -0.2054454206195701 0.1760093011818664, -0.2026901663543818 0.1717346118656159, -0.2003480478565475 0.1672203150479037, -0.1984397197999533 0.1625062214081124, -0.1969820113474757 0.15763390…
2	131550000	135540000	2:131550000-135530000	167	-0.27593	0.161688	-3.33298	0.205936	2	-0.246344	POLYGON ((-0.296397612609518 0.2145128690604621, -0.2798111444184446 0.2157045309567495, -0.2748071370197133 0.215832114539837, -0.2698127250282912 0.2154971272607203, -0.2648705771660607 0.2147024310136666, -0.2600229156471677 0.2134548151210636, -0.2553111554613018 0.2117649383302531, -0.2507755505533302 0.2096472377527363, -0.2464548499220778 0.2071198055237088, -0.2332583717695053 0.198558179…
2	131550000	135540000	2:131550000-135530000	168	-0.309103	0.159304	-1.55325	0.315054	1	0.081243	POLYGON ((-0.3123114679318861 0.2133695313232034, -0.296397612609518 0.2145128690604621, -0.2903963110013372 0.1309821305689076, -0.3100585728591356 0.1268045764588684, -0.3312706886640471 0.1696304396497558, -0.3123114679318861 0.2133695313232034))
2	131550000	135540000	2:131550000-135530000	169	-0.33649	0.145739	-0.699395	0.232755	1	0.227618	POLYGON ((-0.3749252398110707 0.1463490771956183, -0.3748750988547465 0.1465511469410938, -0.3312706886640471 0.1696304396497558, -0.3100585728591356 0.1268045764588684, -0.314459976378442 0.1231076309154388, -0.3521367563453994 0.1238448226275315, -0.3726895055609609 0.1396163489907003, -0.3749252398110707 0.1463490771956183))
2	131550000	135540000	2:131550000-135530000	170	-0.353962	0.178749	-3.33298	0.474891	2	-0.0162615	POLYGON ((-0.3563901793796557 0.2358571606106543, -0.3388320026076526 0.230748512745049, -0.333710913483722 0.2289761279221171, -0.3287925949042714 0.2267008160474875, -0.3241262941147519 0.2239453598751761, -0.3197587349002574 0.2207373498559143, -0.3157336497391104 0.2171089078732841, -0.3123375986678245 0.2133676539493115, -0.3123114679318861 0.2133695313232034, -0.3312706886640471 0.169630439…
2	131550000	135540000	2:131550000-135530000	171	-0.389078	0.188966	-3.33298	0.243455	2	-0.230906	POLYGON ((-0.441455080312258 0.2101606238748157, -0.4314006317173722 0.2227546040801009, -0.427878371970979 0.2267470473900038, -0.4239811097173833 0.2303743417302178, -0.4197465116332572 0.2336014296388074, -0.4152155047146538 0.2363971216117219, -0.4104318807214028 0.2387343975464467, -0.4054418729338302 0.2405906678887772, -0.4002937093124109 0.2419479919587563, -0.3950371463790222 0.242793251…
2	131550000	135540000	2:131550000-135530000	172	-0.409187	0.163778	-3.33298	0.264915	3	0.178027	POLYGON ((-0.4614809011921112 0.1776455472450273, -0.4610777021087926 0.1792768522686721, -0.4593557727226951 0.184172997218045, -0.4571730611574138 0.1888818236534494, -0.4545496147727817 0.1933600828289478, -0.4515095289071438 0.1975666436695306, -0.441455080312258 0.2101606238748157, -0.3784921041080707 0.159893909356688, -0.3748750988547465 0.1465511469410938, -0.3749252398110707 0.1463490771…
2	131550000	135540000	2:131550000-135530000	173	-0.405361	0.122869	-3.33298	0.468371	3	0.0172886	POLYGON ((-0.4244710087024701 0.1071722480430849, -0.419995258835578 0.1421341377489978, -0.3749252398110707 0.1463490771956183, -0.3726895055609609 0.1396163489907003, -0.3908446912930826 0.1064996581888136, -0.4244710087024701 0.1071722480430849))
2	131550000	135540000	2:131550000-135530000	174	-0.43901	0.127177	-0.734781	0.277614	4	-0.20796	POLYGON ((-0.4639892171271978 0.1385587471345111, -0.4605087360650112 0.1751457496190094, -0.419995258835578 0.1421341377489978, -0.4244710087024701 0.1071722480430849, -0.4363789581382509 0.09639043208044815, -0.439790103853597 0.09593574323462484, -0.4639892171271978 0.1385587471345111))
2	131550000	135540000	2:131550000-135530000	175	-0.467017	0.111277	-3.33298	0.48155	2	-0.00596557	POLYGON ((-0.4926779043544394 0.1059630317151963, -0.4639892171271978 0.1385587471345111, -0.439790103853597 0.09593574323462484, -0.4528868522419809 0.08547784906713748, -0.4763470980376081 0.08306740324821854, -0.4909862801189415 0.09037368755142308, -0.4926779043544394 0.1059630317151963))
2	131550000	135540000	2:131550000-135530000	176	-0.490666	0.132091	-3.33298	0.362173	3	0.130768	POLYGON ((-0.5418060625947184 0.1583854562718057, -0.5276983129776971 0.1716066638268057, -0.5236408363746482 0.1750507627758267, -0.5192648967607172 0.1780799683565303, -0.5146127558768251 0.1806650252517176, -0.5097293429473463 0.1827809676221842, -0.504661820764788 0.1844073602206107, -0.4994591302032221 0.1855284957501205, -0.4941715175594451 0.1861335465614621, -0.4888500492866891 0.18621666…
2	131550000	135540000	2:131550000-135530000	177	-0.518881	0.105649	-1.88349	0.416972	1	0.0306835	POLYGON ((-0.5742290494865232 0.09367163622041741, -0.5728488195320811 0.1101649438870302, -0.5720792272098673 0.1157911949090366, -0.5707247244510212 0.1213059292799122, -0.5688002040434206 0.126648512372927, -0.5663268261316348 0.1317602023684694, -0.5633317855606658 0.1365847961216561, -0.5598480128680244 0.1410692471171565, -0.5559138122117399 0.1451642487168056, -0.5418060625947184 0.1583854…
2	131550000	135540000	2:131550000-135530000	178	-0.521642	0.0726621	-1.43092	0.448071	1	0.0245084	POLYGON ((-0.5350983269409124 0.01890642264019667, -0.5456261661760157 0.02410671133164769, -0.5503365190684572 0.02673291485357145, -0.5547623166449468 0.02981458406389084, -0.5588596696357869 0.03332115899940059, -0.5625879458549466 0.03721786603785503, -0.5659101731369205 0.04146606273725595, -0.568793405978292 0.04602362104103319, -0.571209052248131 0.05084534504898976, -0.5731331567273388 0.…
2	131550000	135540000	2:131550000-135530000	179	-0.493281	0.058653	-3.33298	0.463351	2	-0.0178251	POLYGON ((-0.5303855741320546 0.0192481447820961, -0.4968233174515456 0.08719399618848736, -0.4909862801189415 0.09037368755142308, -0.4763470980376081 0.08306740324821854, -0.4788065430338015 0.02327111424253966, -0.5150092261688247 0.01574245709173108, -0.5303855741320546 0.0192481447820961))
2	131550000	135540000	2:131550000-135530000	180	-0.461476	0.0573448	-0.932519	0.315174	1	0.125344	POLYGON ((-0.4788065430338015 0.02327111424253966, -0.4763470980376081 0.08306740324821854, -0.4528868522419809 0.08547784906713748, -0.4369231942558149 0.02893018878120091, -0.4480042779768689 0.01624110693568378, -0.4788065430338015 0.02327111424253966))
2	131550000	135540000	2:131550000-135530000	181	-0.430854	0.0659893	-3.33298	0.430931	2	-0.0332487	POLYGON ((-0.439790103853597 0.09593574323462484, -0.4363789581382509 0.09639043208044815, -0.4049492062884699 0.06481299946971587, -0.4245370080820841 0.03439448847058163, -0.4369231942558149 0.02893018878120091, -0.4528868522419809 0.08547784906713748, -0.439790103853597 0.09593574323462484))
2	131550000	135540000	2:131550000-135530000	182	-0.406004	0.0907234	-3.33298	0.48693	2	-0.00449454	POLYGON ((-0.4363789581382509 0.09639043208044815, -0.4244710087024701 0.1071722480430849, -0.3908446912930826 0.1064996581888136, -0.3839382993857263 0.08592535612000614, -0.3939410500316851 0.06769813134137817, -0.4049492062884699 0.06481299946971587, -0.4363789581382509 0.09639043208044815))
2	131550000	135540000	2:131550000-135530000	183	-0.369237	0.103065	-0.746202	0.47511	1	0.00912725	POLYGON ((-0.3908446912930826 0.1064996581888136, -0.3726895055609609 0.1396163489907003, -0.3521367563453994 0.1238448226275315, -0.3538255714158526 0.09237178174991244, -0.3586055402366078 0.08683937802746042, -0.3839382993857263 0.08592535612000614, -0.3908446912930826 0.1064996581888136))
2	131550000	135540000	2:131550000-135530000	184	-0.341008	0.0786761	-3.33298	0.098838	2	-0.251871	POLYGON ((-0.3586055402366078 0.08683937802746042, -0.3538255714158526 0.09237178174991244, -0.3178613998319003 0.08658427020589397, -0.3093720517973053 0.06627420205275647, -0.312501562328605 0.06365725346724335, -0.3492541440357116 0.05807068271128771, -0.3586055402366078 0.08683937802746042))
2	131550000	135540000	2:131550000-135530000	185	-0.335258	0.0408462	-0.55279	0.267095	1	0.193591	POLYGON ((-0.3645569885254435 0.01809944662330637, -0.3642101305940472 0.04118933724387153, -0.3492541440357116 0.05807068271128771, -0.312501562328605 0.06365725346724335, -0.3263561408247143 0.006699446672442082, -0.3555418745203953 0.01048374396100426, -0.3645569885254435 0.01809944662330637))
2	131550000	135540000	2:131550000-135530000	186	-0.302765	0.0329426	-3.33298	0.0913782	2	-0.267008	POLYGON ((-0.3152448560189033 -0.001276098861944901, -0.3263561408247143 0.006699446672442082, -0.312501562328605 0.06365725346724335, -0.3093720517973053 0.06627420205275647, -0.3016221265634904 0.06545872689398415, -0.2837314549632326 0.04776921141763723, -0.2877612508365897 -0.002608077727880558, -0.3152448560189033 -0.001276098861944901))
2	131550000	135540000	2:131550000-135530000	187	-0.267297	0.0301054	-1.60572	0.214616	1	0.109086	POLYGON ((-0.2470085073583138 -0.005661973530043284, -0.2833483363717028 -0.005179528173635168, -0.2877612508365897 -0.002608077727880558, -0.2837314549632326 0.04776921141763723, -0.2599784072093231 0.04894460989992281, -0.2334308071935716 0.02631500196981411, -0.2287754107529485 0.003037057884648895, -0.2470085073583138 -0.005661973530043284))
2	131550000	135540000	2:131550000-135530000	188	-0.242536	0.0591537	-3.33298	0.326413	2	-0.0934822	POLYGON ((-0.2402176605563111 0.08462380829188962, -0.2199805104020481 0.07058491814032695, -0.2183257374310838 0.06233802816655387, -0.2334308071935716 0.02631500196981411, -0.2599784072093231 0.04894460989992281, -0.2497715995036342 0.08366396122613549, -0.2402176605563111 0.08462380829188962))
2	131550000	135540000	2:131550000-135530000	189	-0.269121	0.0669692	-0.858389	0.0323594	1	0.508107	POLYGON ((-0.2599784072093231 0.04894460989992281, -0.2837314549632326 0.04776921141763723, -0.3016221265634904 0.06545872689398415, -0.2694657314975791 0.0937388986440159, -0.2497715995036342 0.08366396122613549, -0.2599784072093231 0.04894460989992281))
2	131550000	135540000	2:131550000-135530000	190	-0.295972	0.0975006	-0.776398	0.330633	1	0.120745	POLYGON ((-0.3093720517973053 0.06627420205275647, -0.3178613998319003 0.08658427020589397, -0.314459976378442 0.1231076309154388, -0.3100585728591356 0.1268045764588684, -0.2903963110013372 0.1309821305689076, -0.279340136292702 0.1275299632241831, -0.2770310165202212 0.1252517169358416, -0.2694657314975791 0.0937388986440159, -0.3016221265634904 0.06545872689398415, -0.3093720517973053 0.066274…
2	131550000	135540000	2:131550000-135530000	191	-0.337359	0.101355	-3.33298	0.313374	2	-0.0985166	POLYGON ((-0.3538255714158526 0.09237178174991244, -0.3521367563453994 0.1238448226275315, -0.314459976378442 0.1231076309154388, -0.3178613998319003 0.08658427020589397, -0.3538255714158526 0.09237178174991244))
2	131550000	135540000	2:131550000-135530000	192	-0.36804	0.0698893	-0.658778	0.202296	1	0.253319	POLYGON ((-0.3839382993857263 0.08592535612000614, -0.3586055402366078 0.08683937802746042, -0.3492541440357116 0.05807068271128771, -0.3642101305940472 0.04118933724387153, -0.3939410500316851 0.06769813134137817, -0.3839382993857263 0.08592535612000614))
2	131550000	135540000	2:131550000-135530000	193	-0.39316	0.041716	-3.33298	0.390552	2	-0.0528121	POLYGON ((-0.3749245153877223 0.01606076024015984, -0.4245370080820841 0.03439448847058163, -0.4049492062884699 0.06481299946971587, -0.3939410500316851 0.06769813134137817, -0.3642101305940472 0.04118933724387153, -0.3645569885254435 0.01809944662330637, -0.3749245153877223 0.01606076024015984))
2	131550000	135540000	2:131550000-135530000	194	-0.405461	0.0084284	-3.33298	0.340493	2	-0.0831408	POLYGON ((-0.4480042779768689 0.01624110693568378, -0.4369231942558149 0.02893018878120091, -0.4245370080820841 0.03439448847058163, -0.3749245153877223 0.01606076024015984, -0.4154755616443572 -0.02511685566803454, -0.4439021381727032 0.003516086124642498, -0.4480042779768689 0.01624110693568378))
2	131550000	135540000	2:131550000-135530000	195	-0.382088	-0.0145889	-1.20871	0.448491	1	0.0219727	POLYGON ((-0.3773536723385403 -0.05473773457739212, -0.4144101921983325 -0.02863337004307048, -0.4154755616443572 -0.02511685566803454, -0.3749245153877223 0.01606076024015984, -0.3645569885254435 0.01809944662330637, -0.3555418745203953 0.01048374396100426, -0.3707516461303066 -0.05128755742461547, -0.3745322865157589 -0.05414764519146242, -0.3773536723385403 -0.05473773457739212))
2	131550000	135540000	2:131550000-135530000	196	-0.343672	-0.0240479	-0.624639	0.49881	4	-0.0119957	POLYGON ((-0.330453425291823 -0.04697425160880109, -0.3707516461303066 -0.05128755742461547, -0.3555418745203953 0.01048374396100426, -0.3263561408247143 0.006699446672442082, -0.3152448560189033 -0.001276098861944901, -0.330453425291823 -0.04697425160880109))
2	131550000	135540000	2:131550000-135530000	197	-0.306133	-0.0365413	-1.08128	0.265255	1	0.158613	POLYGON ((-0.310421350141851 -0.06517963129713877, -0.330453425291823 -0.04697425160880109, -0.3152448560189033 -0.001276098861944901, -0.2877612508365897 -0.002608077727880558, -0.2833483363717028 -0.005179528173635168, -0.2903544796272559 -0.06639502695108007, -0.310421350141851 -0.06517963129713877))
2	131550000	135540000	2:131550000-135530000	198	-0.268239	-0.0408782	-3.33298	0.345253	3	0.0838145	POLYGON ((-0.2633717457420759 -0.08653625418910484, -0.2649326342520246 -0.08615129689680716, -0.2903544796272559 -0.06639502695108007, -0.2833483363717028 -0.005179528173635168, -0.2470085073583138 -0.005661973530043284, -0.2533488614360054 -0.08088471078187426, -0.2633717457420759 -0.08653625418910484))
2	131550000	135540000	2:131550000-135530000	199	-0.231972	-0.043935	-3.33298	0.352933	3	0.0793117	POLYGON ((-0.2241687186222899 0.001532285850107677, -0.1977520441843819 -0.0183780874175722, -0.2309829548883292 -0.07924854993876822, -0.2533488614360054 -0.08088471078187426, -0.2470085073583138 -0.005661973530043284, -0.2287754107529485 0.003037057884648895, -0.2241687186222899 0.001532285850107677))
2	131550000	135540000	2:131550000-135530000	200	-0.200744	-0.0609834	-3.33298	0.198376	3	0.171221	POLYGON ((-0.1643831575574395 -0.04961835193987513, -0.2079276881542914 -0.09051915259425918, -0.2309829548883292 -0.07924854993876822, -0.1977520441843819 -0.0183780874175722, -0.1901584612776352 -0.02004637167603944, -0.1648814992111604 -0.04794888580332601, -0.1643831575574395 -0.04961835193987513))
2	131550000	135540000	2:131550000-135530000	201	-0.178	-0.0851969	-3.33298	0.0748785	3	0.286231	POLYGON ((-0.1731273003937857 -0.1077236701871748, -0.2065325887657658 -0.09285708479208704, -0.2079276881542914 -0.09051915259425918, -0.1643831575574395 -0.04961835193987513, -0.1535985362817447 -0.06140011275234376, -0.1508871171971227 -0.07091554982246842, -0.1731273003937857 -0.1077236701871748))
2	131550000	135540000	2:131550000-135530000	202	-0.150919	-0.10156	-1.19449	0.0445991	4	-0.382702	POLYGON ((-0.1688068676652671 -0.1180715308696501, -0.1731273003937857 -0.1077236701871748, -0.1508871171971227 -0.07091554982246842, -0.1170250126335149 -0.10250714273634, -0.1570050376695559 -0.1234299053674708, -0.1688068676652671 -0.1180715308696501))
2	131550000	135540000	2:131550000-135530000	203	-0.135567	-0.130895	-3.33298	0.0564789	3	0.347218	POLYGON ((-0.0822382471214626 -0.1401065530498915, -0.0823743753091505 -0.1410656908089829, -0.0835920972576898 -0.1461104854262618, -0.08528710743392146 -0.1510155583081823, -0.08744384041351105 -0.1557358657483, -0.09004249073188142 -0.1602280607571252, -0.09305919475949842 -0.1644508911212577, -0.09646624984363487 -0.1683655782260133, -0.1002323687042149 -0.17193617316278, -0.1043229667475996 …
2	131550000	135540000	2:131550000-135530000	204	-0.169464	-0.142406	-3.33298	0.0137797	3	0.451884	POLYGON ((-0.1418736915467481 -0.1679890014723437, -0.1828868777501658 -0.1665417878813134, -0.1963215603319191 -0.1552100755186174, -0.1980442079034954 -0.1478586196176837, -0.1688068676652671 -0.1180715308696501, -0.1570050376695559 -0.1234299053674708, -0.1418736915467481 -0.1679890014723437))
2	131550000	135540000	2:131550000-135530000	205	-0.193125	-0.119182	-3.33298	0.0558589	3	0.302486	POLYGON ((-0.2125643572528498 -0.1347482039301057, -0.2065325887657658 -0.09285708479208704, -0.1731273003937857 -0.1077236701871748, -0.1688068676652671 -0.1180715308696501, -0.1980442079034954 -0.1478586196176837, -0.2125643572528498 -0.1347482039301057))
2	131550000	135540000	2:131550000-135530000	206	-0.226822	-0.11433	-3.33298	0.0812184	3	0.27742	POLYGON ((-0.2065325887657658 -0.09285708479208704, -0.2125643572528498 -0.1347482039301057, -0.2295654642508757 -0.1350570838008989, -0.2387324133471617 -0.1309050663754089, -0.260786312671941 -0.1020231709969006, -0.2633717457420759 -0.08653625418910484, -0.2533488614360054 -0.08088471078187426, -0.2309829548883292 -0.07924854993876822, -0.2079276881542914 -0.09051915259425918, -0.2065325887657…
2	131550000	135540000	2:131550000-135530000	207	-0.243336	-0.150789	-3.33298	0.0334393	3	0.358009	POLYGON ((-0.2608528490432464 -0.1560814892704487, -0.2387324133471617 -0.1309050663754089, -0.2295654642508757 -0.1350570838008989, -0.2460789652046956 -0.1934630499918721, -0.246996771172413 -0.1945438545413985, -0.2608528490432464 -0.1560814892704487))
2	131550000	135540000	2:131550000-135530000	208	-0.27772	-0.163176	-0.464234	0.0164597	4	-0.74977	POLYGON ((-0.2492978849588747 -0.2027065969332546, -0.2551103083427174 -0.2050837107337713, -0.3086188896305555 -0.1911771720226913, -0.3062037571477884 -0.1735702637913728, -0.2767270735475043 -0.1435439818659445, -0.2608528490432464 -0.1560814892704487, -0.246996771172413 -0.1945438545413985, -0.2492978849588747 -0.2027065969332546))
2	131550000	135540000	2:131550000-135530000	209	-0.288911	-0.124695	-0.988997	0.0469991	4	-0.407436	POLYGON ((-0.2649326342520246 -0.08615129689680716, -0.2633717457420759 -0.08653625418910484, -0.260786312671941 -0.1020231709969006, -0.2772817806959355 -0.1404372155454935, -0.3212215439052734 -0.1242852785439837, -0.2649326342520246 -0.08615129689680716))
2	131550000	135540000	2:131550000-135530000	210	-0.30962	-0.0941263	-3.33298	0.463251	2	-0.0165241	POLYGON ((-0.2649326342520246 -0.08615129689680716, -0.3212215439052734 -0.1242852785439837, -0.3218526888689855 -0.1244503895411212, -0.3379285254562388 -0.1189283054101157, -0.3377031880220501 -0.1011041801588622, -0.310421350141851 -0.06517963129713877, -0.2903544796272559 -0.06639502695108007, -0.2649326342520246 -0.08615129689680716))
2	131550000	135540000	2:131550000-135530000	211	-0.33852	-0.0721789	-2.1801	0.444911	4	-0.00374056	POLYGON ((-0.310421350141851 -0.06517963129713877, -0.3377031880220501 -0.1011041801588622, -0.3745322865157589 -0.05414764519146242, -0.3707516461303066 -0.05128755742461547, -0.330453425291823 -0.04697425160880109, -0.310421350141851 -0.06517963129713877))
2	131550000	135540000	2:131550000-135530000	212	-0.365601	-0.0934186	-1.36772	0.417532	4	-0.0412436	POLYGON ((-0.3379285254562388 -0.1189283054101157, -0.3695652384404107 -0.1365334594940739, -0.382759223509435 -0.1243145938821529, -0.3804034574783861 -0.06000427620409462, -0.3773536723385403 -0.05473773457739212, -0.3745322865157589 -0.05414764519146242, -0.3377031880220501 -0.1011041801588622, -0.3379285254562388 -0.1189283054101157))
2	131550000	135540000	2:131550000-135530000	213	-0.397611	-0.092246	-3.33298	0.385832	2	-0.0538787	POLYGON ((-0.4296656941271865 -0.09314938915390487, -0.3804034574783861 -0.06000427620409462, -0.382759223509435 -0.1243145938821529, -0.412464663464737 -0.1158784233318642, -0.4296656941271865 -0.09314938915390487))
2	131550000	135540000	2:131550000-135530000	214	-0.416752	-0.0637972	-3.33298	0.161437	2	-0.196259	POLYGON ((-0.4403615835128026 -0.08913703741427577, -0.4372937227291968 -0.05423316716527534, -0.4144101921983325 -0.02863337004307048, -0.3773536723385403 -0.05473773457739212, -0.3804034574783861 -0.06000427620409462, -0.4296656941271865 -0.09314938915390487, -0.4403615835128026 -0.08913703741427577))
2	131550000	135540000	2:131550000-135530000	215	-0.459188	-0.0600673	-3.33298	0.188456	2	-0.181549	POLYGON ((-0.4548598547716209 -0.09367756788325461, -0.4802826919375401 -0.04311224376493319, -0.4803815420969781 -0.04242073579085803, -0.4736955568259101 -0.03963687918638517, -0.4372937227291968 -0.05423316716527534, -0.4403615835128026 -0.08913703741427577, -0.4548598547716209 -0.09367756788325461))
2	131550000	135540000	2:131550000-135530000	216	-0.495782	-0.0652983	-1.36181	0.423272	1	0.0325654	POLYGON ((-0.5357942726673521 -0.08432032226276816, -0.5431981159226755 -0.08115422533283104, -0.5507577029004647 -0.0742109866933143, -0.488291669066988 -0.03962324864999445, -0.4803815420969781 -0.04242073579085803, -0.4802826919375401 -0.04311224376493319, -0.4932664211561075 -0.08728049496894784, -0.5357942726673521 -0.08432032226276816))
2	131550000	135540000	2:131550000-135530000	217	-0.514028	-0.0323457	-1.15338	0.0924382	1	0.372749	POLYGON ((-0.5533549966960569 -0.07311909866363345, -0.5614058331750534 -0.05857915322820449, -0.5636957229918959 -0.05393202438064294, -0.5655310897694892 -0.0490873540419284, -0.5668951376242064 -0.04408947695769003, -0.5677753838254515 -0.03898412990540186, -0.5681637730281346 -0.03381803314611125, -0.5680567509890769 -0.02863846287607246, -0.5674552970927456 -0.02349281859088313, -0.566364915…
2	131550000	135540000	2:131550000-135530000	218	-0.477975	-0.0149478	-1.79634	0.268475	1	0.0642448	POLYGON ((-0.488291669066988 -0.03962324864999445, -0.5150092261688247 0.01574245709173108, -0.4788065430338015 0.02327111424253966, -0.4480042779768689 0.01624110693568378, -0.4439021381727032 0.003516086124642498, -0.4736955568259101 -0.03963687918638517, -0.4803815420969781 -0.04242073579085803, -0.488291669066988 -0.03962324864999445))
2	131550000	135540000	2:131550000-135530000	219	-0.449092	-0.0348887	-1.56605	0.325653	1	0.060925	POLYGON ((-0.4372937227291968 -0.05423316716527534, -0.4736955568259101 -0.03963687918638517, -0.4439021381727032 0.003516086124642498, -0.4154755616443572 -0.02511685566803454, -0.4144101921983325 -0.02863337004307048, -0.4372937227291968 -0.05423316716527534))
2	131550000	135540000	2:131550000-135530000	220	-0.479255	-0.0701564	-0.7869	0.441231	4	-0.0503123	POLYGON ((-0.4932664211561075 -0.08728049496894784, -0.4802826919375401 -0.04311224376493319, -0.4548598547716209 -0.09367756788325461, -0.4652931927760456 -0.1014664716669408, -0.4932664211561075 -0.08728049496894784))
2	131550000	135540000	2:131550000-135530000	221	-0.498803	-0.108702	-0.984114	0.312934	4	-0.121655	POLYGON ((-0.5052787243637444 -0.1241769276815703, -0.5357942726673521 -0.08432032226276816, -0.4932664211561075 -0.08728049496894784, -0.4652931927760456 -0.1014664716669408, -0.4671865965773061 -0.1089592303698698, -0.5052787243637444 -0.1241769276815703))
2	131550000	135540000	2:131550000-135530000	222	-0.475663	-0.148642	-3.33298	0.0731985	3	0.252001	POLYGON ((-0.4963443919705203 -0.1506959217008227, -0.4648650562456776 -0.1253518159849793, -0.4532022643209737 -0.1424179435019109, -0.4634894277964725 -0.1720792395025439, -0.4751202372942899 -0.1729231485365405, -0.4963443919705203 -0.1506959217008227))
2	131550000	135540000	2:131550000-135530000	223	-0.439418	-0.161212	-1.89322	0.0387792	4	-0.118442	POLYGON ((-0.4192936270397088 -0.1627000695719742, -0.445031703321349 -0.1803835032489538, -0.4563362004615313 -0.1786169438470701, -0.4634894277964725 -0.1720792395025439, -0.4532022643209737 -0.1424179435019109, -0.4322372169076291 -0.1425155161734078, -0.4192936270397088 -0.1627000695719742))
2	131550000	135540000	2:131550000-135530000	224	-0.445535	-0.200353	-3.33298	0.160137	3	0.184347	POLYGON ((-0.4633508115578955 -0.2364697542002718, -0.4635098006839803 -0.236050673376437, -0.4563362004615313 -0.1786169438470701, -0.445031703321349 -0.1803835032489538, -0.4234930389274293 -0.2043629663784072, -0.4370352289875876 -0.2296723673273292, -0.4575343806205941 -0.2372622479641057, -0.4633508115578955 -0.2364697542002718))
2	131550000	135540000	2:131550000-135530000	225	-0.407928	-0.220476	-3.33298	0.0362993	3	0.331574	POLYGON ((-0.3726736604765016 -0.2274498821619911, -0.3927442929735978 -0.2493909119643731, -0.4370352289875876 -0.2296723673273292, -0.4234930389274293 -0.2043629663784072, -0.4095292651673013 -0.1981193709861927, -0.3726736604765016 -0.2274498821619911))
2	131550000	135540000	2:131550000-135530000	226	-0.424392	-0.257457	-3.33298	0.0331793	3	0.330842	POLYGON ((-0.3927442929735978 -0.2493909119643731, -0.3946447618721643 -0.2755619402947603, -0.403656282450691 -0.2840371060646307, -0.4286153838573185 -0.286222280126238, -0.4575343806205941 -0.2372622479641057, -0.4370352289875876 -0.2296723673273292, -0.3927442929735978 -0.2493909119643731))
2	131550000	135540000	2:131550000-135530000	227	-0.455846	-0.276036	-1.14643	0.00931981	4	-0.475536	POLYGON ((-0.475818415686163 -0.2466649102733804, -0.4633508115578955 -0.2364697542002718, -0.4575343806205941 -0.2372622479641057, -0.4286153838573185 -0.286222280126238, -0.4549839881341143 -0.3116199012607866, -0.455411158976583 -0.3116364222860267, -0.467990156704498 -0.3052798625927424, -0.475818415686163 -0.2466649102733804))
2	131550000	135540000	2:131550000-135530000	228	-0.487383	-0.280248	-3.33298	0.0308394	3	0.376349	POLYGON ((-0.5349478979072037 -0.3010904191701178, -0.47765821846096 -0.2470783719588277, -0.475818415686163 -0.2466649102733804, -0.467990156704498 -0.3052798625927424, -0.5153428293845297 -0.3080511317917847, -0.5349478979072037 -0.3010904191701178))
2	131550000	135540000	2:131550000-135530000	229	-0.511342	-0.254834	-1.09287	0.00599988	4	-0.588661	POLYGON ((-0.542149832278665 -0.3011034261617921, -0.5499257352584938 -0.2928556553010281, -0.5604563642832627 -0.2826316699324591, -0.5145274654654756 -0.2353252451352211, -0.47765821846096 -0.2470783719588277, -0.5349478979072037 -0.3010904191701178, -0.542149832278665 -0.3011034261617921))
2	131550000	135540000	2:131550000-135530000	230	-0.534122	-0.232718	-0.939423	0.0217796	4	-0.606286	POLYGON ((-0.5864432413824975 -0.2464438813792508, -0.5864446035965766 -0.2464426387811929, -0.5303579362820164 -0.2130993218242349, -0.5190858485835074 -0.2220060379466106, -0.5145274654654756 -0.2353252451352211, -0.5604563642832627 -0.2826316699324591, -0.5718461006931729 -0.2715735937118573, -0.5754642438392815 -0.2676991873158966, -0.5786862560006822 -0.2634896003553294, -0.5814812647110082 …
2	131550000	135540000	2:131550000-135530000	231	-0.512142	-0.2049	-3.33298	0.267995	3	0.123031	POLYGON ((-0.5296189089653419 -0.1855241431506509, -0.5131529141240816 -0.185264013234388, -0.4937882236083475 -0.1926268877708216, -0.491783912176086 -0.2028092828419155, -0.5190858485835074 -0.2220060379466106, -0.5303579362820164 -0.2130993218242349, -0.5318166138670722 -0.1876292148501201, -0.5296189089653419 -0.1855241431506509))
2	131550000	135540000	2:131550000-135530000	232	-0.512762	-0.165606	-3.33298	0.360153	3	0.0693604	POLYGON ((-0.5131529141240816 -0.185264013234388, -0.5296189089653419 -0.1855241431506509, -0.5312795527507844 -0.1492504120366659, -0.5080686343077804 -0.1438377089941172, -0.4983779898514504 -0.1502205324283459, -0.5131529141240816 -0.185264013234388))
2	131550000	135540000	2:131550000-135530000	233	-0.521907	-0.126391	-3.33298	0.403512	3	0.0536906	POLYGON ((-0.5080686343077804 -0.1438377089941172, -0.5312795527507844 -0.1492504120366659, -0.5366427722574157 -0.1457940737832123, -0.5431981159226755 -0.08115422533283104, -0.5357942726673521 -0.08432032226276816, -0.5052787243637444 -0.1241769276815703, -0.5080686343077804 -0.1438377089941172))
2	131550000	135540000	2:131550000-135530000	234	-0.554974	-0.129745	-1.00571	0.431891	4	-0.0611034	POLYGON ((-0.6048983554377549 -0.1580833456014403, -0.6082728363871215 -0.139341212744689, -0.6089513838758207 -0.1341378006350714, -0.6091231510865466 -0.1288931442781448, -0.6087865253434613 -0.1236564843325284, -0.6079446671345301 -0.1184769863807008, -0.6066054804385554 -0.1134032793266568, -0.6047815385168605 -0.1084829988322932, -0.6024899658663414 -0.1037623400790761, -0.5997522774422038 -…
2	131550000	135540000	2:131550000-135530000	235	-0.548225	-0.167229	-3.33298	0.359793	3	0.0867744	POLYGON ((-0.602940817726318 -0.1855451716483022, -0.6025227571675513 -0.1712776054187266, -0.6048983554377549 -0.1580833456014403, -0.5366427722574157 -0.1457940737832123, -0.5312795527507844 -0.1492504120366659, -0.5296189089653419 -0.1855241431506509, -0.5318166138670722 -0.1876292148501201, -0.602940817726318 -0.1855451716483022))
2	131550000	135540000	2:131550000-135530000	236	-0.549391	-0.207034	-3.33298	0.129857	3	0.281448	POLYGON ((-0.5864446035965766 -0.2464426387811929, -0.5878661288845581 -0.245145937631756, -0.5915211915899939 -0.2410620405476241, -0.5947447701694852 -0.236629632633601, -0.597503849564152 -0.2318941094662652, -0.5997701719957447 -0.2269039710502982, -0.6015205263755072 -0.2217103250939689, -0.6027369860261513 -0.2163663635771909, -0.6034070922822526 -0.2109268179730082, -0.6035239820886827 -0.…
2	131550000	135540000	2:131550000-135530000	237	-0.500639	-0.221259	-3.33298	0.0549989	3	0.303296	POLYGON ((-0.47765821846096 -0.2470783719588277, -0.5145274654654756 -0.2353252451352211, -0.5190858485835074 -0.2220060379466106, -0.491783912176086 -0.2028092828419155, -0.4635098006839803 -0.236050673376437, -0.4633508115578955 -0.2364697542002718, -0.475818415686163 -0.2466649102733804, -0.47765821846096 -0.2470783719588277))
2	131550000	135540000	2:131550000-135530000	238	-0.472152	-0.197029	-3.33298	0.0724986	3	0.252767	POLYGON ((-0.491783912176086 -0.2028092828419155, -0.4937882236083475 -0.1926268877708216, -0.4751202372942899 -0.1729231485365405, -0.4634894277964725 -0.1720792395025439, -0.4563362004615313 -0.1786169438470701, -0.4635098006839803 -0.236050673376437, -0.491783912176086 -0.2028092828419155))
2	131550000	135540000	2:131550000-135530000	239	-0.499351	-0.17126	-3.33298	0.338553	3	0.0765795	POLYGON ((-0.4937882236083475 -0.1926268877708216, -0.5131529141240816 -0.185264013234388, -0.4983779898514504 -0.1502205324283459, -0.4963443919705203 -0.1506959217008227, -0.4751202372942899 -0.1729231485365405, -0.4937882236083475 -0.1926268877708216))
2	131550000	135540000	2:131550000-135530000	240	-0.489923	-0.13093	-0.769056	0.0556589	4	-0.432054	POLYGON ((-0.4983779898514504 -0.1502205324283459, -0.5080686343077804 -0.1438377089941172, -0.5052787243637444 -0.1241769276815703, -0.4671865965773061 -0.1089592303698698, -0.4648650562456776 -0.1253518159849793, -0.4963443919705203 -0.1506959217008227, -0.4983779898514504 -0.1502205324283459))
2	131550000	135540000	2:131550000-135530000	241	-0.439244	-0.123753	-3.33298	0.253175	3	0.12671	POLYGON ((-0.4532022643209737 -0.1424179435019109, -0.4648650562456776 -0.1253518159849793, -0.4671865965773061 -0.1089592303698698, -0.4652931927760456 -0.1014664716669408, -0.4548598547716209 -0.09367756788325461, -0.4403615835128026 -0.08913703741427577, -0.4296656941271865 -0.09314938915390487, -0.412464663464737 -0.1158784233318642, -0.4322372169076291 -0.1425155161734078, -0.453202264320973…
2	131550000	135540000	2:131550000-135530000	242	-0.41225	-0.14379	-1.67454	0.0770585	4	-0.152774	POLYGON ((-0.3791060011911391 -0.1591025508332383, -0.3998564411996412 -0.1692452313666165, -0.4192936270397088 -0.1627000695719742, -0.4322372169076291 -0.1425155161734078, -0.412464663464737 -0.1158784233318642, -0.382759223509435 -0.1243145938821529, -0.3695652384404107 -0.1365334594940739, -0.371280940854431 -0.148077147631921, -0.3791060011911391 -0.1591025508332383))
2	131550000	135540000	2:131550000-135530000	243	-0.425123	-0.182019	-3.33298	0.0746985	3	0.255857	POLYGON ((-0.3998564411996412 -0.1692452313666165, -0.4095292651673013 -0.1981193709861927, -0.4234930389274293 -0.2043629663784072, -0.445031703321349 -0.1803835032489538, -0.4192936270397088 -0.1627000695719742, -0.3998564411996412 -0.1692452313666165))
2	131550000	135540000	2:131550000-135530000	244	-0.387384	-0.194661	-3.33298	0.0750185	3	0.277246	POLYGON ((-0.3625312339575218 -0.2237129889258323, -0.3726736604765016 -0.2274498821619911, -0.4095292651673013 -0.1981193709861927, -0.3998564411996412 -0.1692452313666165, -0.3791060011911391 -0.1591025508332383, -0.3615512136045513 -0.2224823401088268, -0.3625312339575218 -0.2237129889258323))
2	131550000	135540000	2:131550000-135530000	245	-0.353713	-0.185335	-1.28644	0.0823184	4	-0.257076	POLYGON ((-0.3220165828751997 -0.2048210687698363, -0.3615512136045513 -0.2224823401088268, -0.3791060011911391 -0.1591025508332383, -0.371280940854431 -0.148077147631921, -0.3130768403485442 -0.1932975550750506, -0.3220165828751997 -0.2048210687698363))
2	131550000	135540000	2:131550000-135530000	246	-0.330836	-0.15589	-3.33298	0.167697	3	0.198578	POLYGON ((-0.3130768403485442 -0.1932975550750506, -0.371280940854431 -0.148077147631921, -0.3695652384404107 -0.1365334594940739, -0.3379285254562388 -0.1189283054101157, -0.3218526888689855 -0.1244503895411212, -0.3062037571477884 -0.1735702637913728, -0.3086188896305555 -0.1911771720226913, -0.3130768403485442 -0.1932975550750506))
2	131550000	135540000	2:131550000-135530000	247	-0.296338	-0.1449	-3.33298	0.167697	3	0.198578	POLYGON ((-0.3212215439052734 -0.1242852785439837, -0.2772817806959355 -0.1404372155454935, -0.2767270735475043 -0.1435439818659445, -0.3062037571477884 -0.1735702637913728, -0.3218526888689855 -0.1244503895411212, -0.3212215439052734 -0.1242852785439837))
2	131550000	135540000	2:131550000-135530000	248	-0.257859	-0.138029	-3.33298	0.0375392	3	0.331102	POLYGON ((-0.2772817806959355 -0.1404372155454935, -0.260786312671941 -0.1020231709969006, -0.2387324133471617 -0.1309050663754089, -0.2608528490432464 -0.1560814892704487, -0.2767270735475043 -0.1435439818659445, -0.2772817806959355 -0.1404372155454935))
2	131550000	135540000	2:131550000-135530000	249	-0.226071	-0.155671	-3.33298	0.0291194	3	0.338197	POLYGON ((-0.2125643572528498 -0.1347482039301057, -0.1980442079034954 -0.1478586196176837, -0.1963215603319191 -0.1552100755186174, -0.2460789652046956 -0.1934630499918721, -0.2295654642508757 -0.1350570838008989, -0.2125643572528498 -0.1347482039301057))
2	131550000	135540000	2:131550000-135530000	250	-0.204414	-0.183842	-3.33298	0.0467791	3	0.318974	POLYGON ((-0.1828868777501658 -0.1665417878813134, -0.1938449141644753 -0.2136781029138266, -0.1944438082386688 -0.2139642378744402, -0.2360578645792413 -0.2101111820747103, -0.2492978849588747 -0.2027065969332546, -0.246996771172413 -0.1945438545413985, -0.2460789652046956 -0.1934630499918721, -0.1963215603319191 -0.1552100755186174, -0.1828868777501658 -0.1665417878813134))
2	131550000	135540000	2:131550000-135530000	251	-0.171199	-0.191563	-2.07941	0.00371993	4	-0.108371	POLYGON ((-0.1828868777501658 -0.1665417878813134, -0.1418736915467481 -0.1679890014723437, -0.1263572703263461 -0.1771022094692825, -0.1807847966292922 -0.2152945709793364, -0.1938449141644753 -0.2136781029138266, -0.1828868777501658 -0.1665417878813134))
2	131550000	135540000	2:131550000-135530000	252	-0.155208	-0.214352	-3.33298	0.0107798	3	0.495348	POLYGON ((-0.1129778491529506 -0.1802510270048721, -0.1108774002874459 -0.183244354239826, -0.1079728485929507 -0.1878619172032253, -0.1055475679880345 -0.1927482575776127, -0.1036261665333847 -0.1978537962090423, -0.102837488101733 -0.2008284522797011, -0.1028300654667794 -0.2008297292473979, -0.1374000433273464 -0.2387378157422311, -0.1481214672256675 -0.2427043710109515, -0.1807847966292922 -0…
2	131550000	135540000	2:131550000-135530000	253	-0.177274	-0.240647	-3.33298	0.0397592	3	0.3543	POLYGON ((-0.1938449141644753 -0.2136781029138266, -0.1807847966292922 -0.2152945709793364, -0.1481214672256675 -0.2427043710109515, -0.1544749447130902 -0.2522192915007118, -0.1925774881002185 -0.2692408712140472, -0.1944438082386688 -0.2139642378744402, -0.1938449141644753 -0.2136781029138266))
2	131550000	135540000	2:131550000-135530000	254	-0.209775	-0.241744	-0.917161	0.0567789	4	-0.4062	POLYGON ((-0.2148345763159425 -0.2851335613855284, -0.2360578645792413 -0.2101111820747103, -0.1944438082386688 -0.2139642378744402, -0.1925774881002185 -0.2692408712140472, -0.2018100584978451 -0.2820239239197941, -0.2087038249318184 -0.2859538334610805, -0.2094483163766209 -0.2860030242595322, -0.2148345763159425 -0.2851335613855284))
2	131550000	135540000	2:131550000-135530000	255	-0.241875	-0.250825	-3.33298	0.180956	3	0.183253	POLYGON ((-0.26829211659582 -0.2521925304667526, -0.2703688245826867 -0.2455214913394063, -0.2551103083427174 -0.2050837107337713, -0.2492978849588747 -0.2027065969332546, -0.2360578645792413 -0.2101111820747103, -0.2148345763159425 -0.2851335613855284, -0.2224311514284315 -0.2869261456970927, -0.26829211659582 -0.2521925304667526))
2	131550000	135540000	2:131550000-135530000	256	-0.26245	-0.277992	-1.7979	0.130337	4	-0.108237	POLYGON ((-0.2926176924549447 -0.3100287209465184, -0.26829211659582 -0.2521925304667526, -0.2224311514284315 -0.2869261456970927, -0.2438908061994645 -0.3035913660934897, -0.2926176924549447 -0.3100287209465184))
2	131550000	135540000	2:131550000-135530000	257	-0.290818	-0.266061	-3.33298	0.196696	2	-0.179875	POLYGON ((-0.301067657099556 -0.3140859992175243, -0.3217479882905342 -0.2721988787188823, -0.3074115026155577 -0.2501757904441175, -0.2703688245826867 -0.2455214913394063, -0.26829211659582 -0.2521925304667526, -0.2926176924549447 -0.3100287209465184, -0.3000488592319165 -0.313978855762256, -0.301067657099556 -0.3140859992175243))
2	131550000	135540000	2:131550000-135530000	258	-0.295264	-0.230679	-3.33298	0.195116	3	0.17306	POLYGON ((-0.2703688245826867 -0.2455214913394063, -0.3074115026155577 -0.2501757904441175, -0.3220165828751997 -0.2048210687698363, -0.3130768403485442 -0.1932975550750506, -0.3086188896305555 -0.1911771720226913, -0.2551103083427174 -0.2050837107337713, -0.2703688245826867 -0.2455214913394063))
2	131550000	135540000	2:131550000-135530000	259	-0.328653	-0.241431	-3.33298	0.0635187	3	0.320249	POLYGON ((-0.3217479882905342 -0.2721988787188823, -0.3360347097267666 -0.2675538192571073, -0.3625312339575218 -0.2237129889258323, -0.3615512136045513 -0.2224823401088268, -0.3220165828751997 -0.2048210687698363, -0.3074115026155577 -0.2501757904441175, -0.3217479882905342 -0.2721988787188823))
2	131550000	135540000	2:131550000-135530000	260	-0.362594	-0.261944	-1.1299	0.00691986	4	-0.547943	POLYGON ((-0.3360347097267666 -0.2675538192571073, -0.3678133140563855 -0.2851078098869677, -0.3946447618721643 -0.2755619402947603, -0.3927442929735978 -0.2493909119643731, -0.3726736604765016 -0.2274498821619911, -0.3625312339575218 -0.2237129889258323, -0.3360347097267666 -0.2675538192571073))
2	131550000	135540000	2:131550000-135530000	261	-0.345427	-0.293022	-3.33298	0.0576388	3	0.318436	POLYGON ((-0.3079156186474838 -0.3207749790049104, -0.3520811147885138 -0.3239891761399648, -0.3678133140563855 -0.2851078098869677, -0.3360347097267666 -0.2675538192571073, -0.3217479882905342 -0.2721988787188823, -0.301067657099556 -0.3140859992175243, -0.3079156186474838 -0.3207749790049104))
2	131550000	135540000	2:131550000-135530000	262	-0.378397	-0.306363	-3.33298	0.0632987	3	0.303016	POLYGON ((-0.3520811147885138 -0.3239891761399648, -0.3595606730370192 -0.3299001189085463, -0.3958428711881491 -0.3270806701596091, -0.403656282450691 -0.2840371060646307, -0.3946447618721643 -0.2755619402947603, -0.3678133140563855 -0.2851078098869677, -0.3520811147885138 -0.3239891761399648))
2	131550000	135540000	2:131550000-135530000	263	-0.419458	-0.313816	-2.21642	0.0301994	4	-0.0295227	POLYGON ((-0.4286153838573185 -0.286222280126238, -0.403656282450691 -0.2840371060646307, -0.3958428711881491 -0.3270806701596091, -0.4009970950474541 -0.3324077238043598, -0.4379651257530153 -0.3287867445911797, -0.4549839881341143 -0.3116199012607866, -0.4286153838573185 -0.286222280126238))
2	131550000	135540000	2:131550000-135530000	264	-0.422714	-0.347064	-3.33298	0.122658	3	0.226407	POLYGON ((-0.4009970950474541 -0.3324077238043598, -0.4036632077126601 -0.3666922369785452, -0.4108921572391196 -0.3713554390637746, -0.4378563386019784 -0.3618252365323772, -0.4379651257530153 -0.3287867445911797, -0.4009970950474541 -0.3324077238043598))
2	131550000	135540000	2:131550000-135530000	265	-0.381807	-0.350245	-3.33298	0.164577	3	0.195731	POLYGON ((-0.3595606730370192 -0.3299001189085463, -0.3626053654900801 -0.366204951780369, -0.374767753591588 -0.3748505952467168, -0.4036632077126601 -0.3666922369785452, -0.4009970950474541 -0.3324077238043598, -0.3958428711881491 -0.3270806701596091, -0.3595606730370192 -0.3299001189085463))
2	131550000	135540000	2:131550000-135530000	266	-0.341014	-0.353666	-3.33298	0.336393	3	0.0890199	POLYGON ((-0.3122932765517678 -0.370662045824711, -0.3167423766243788 -0.3769682520086706, -0.3237892536716394 -0.3800682150707999, -0.3626053654900801 -0.366204951780369, -0.3595606730370192 -0.3299001189085463, -0.3520811147885138 -0.3239891761399648, -0.3079156186474838 -0.3207749790049104, -0.3122932765517678 -0.370662045824711))
2	131550000	135540000	2:131550000-135530000	267	-0.353842	-0.389585	-3.33298	0.0773785	3	0.292349	POLYGON ((-0.3587616690139879 -0.4266958273209074, -0.3725336626810142 -0.4096267103365117, -0.374767753591588 -0.3748505952467168, -0.3626053654900801 -0.366204951780369, -0.3237892536716394 -0.3800682150707999, -0.348801679554832 -0.4251369468306784, -0.3587616690139879 -0.4266958273209074))
2	131550000	135540000	2:131550000-135530000	268	-0.393636	-0.392141	-0.627756	0.0552389	4	-0.544329	POLYGON ((-0.3725336626810142 -0.4096267103365117, -0.4117097095380566 -0.4065964189848063, -0.4173882717254184 -0.4004380708360132, -0.4108921572391196 -0.3713554390637746, -0.4036632077126601 -0.3666922369785452, -0.374767753591588 -0.3748505952467168, -0.3725336626810142 -0.4096267103365117))
2	131550000	135540000	2:131550000-135530000	269	-0.435353	-0.382823	-3.33298	0.0580988	3	0.33064	POLYGON ((-0.4173882717254184 -0.4004380708360132, -0.4467174518063169 -0.406050532029482, -0.4611825934638202 -0.3990789573787706, -0.4672048803705614 -0.389082809945508, -0.4671506681014084 -0.3764010109493057, -0.4378563386019784 -0.3618252365323772, -0.4108921572391196 -0.3713554390637746, -0.4173882717254184 -0.4004380708360132))
2	131550000	135540000	2:131550000-135530000	270	-0.453095	-0.347164	-3.33298	0.168077	3	0.195828	POLYGON ((-0.4549839881341143 -0.3116199012607866, -0.4379651257530153 -0.3287867445911797, -0.4378563386019784 -0.3618252365323772, -0.4671506681014084 -0.3764010109493057, -0.4788469415279136 -0.3612276778378077, -0.455411158976583 -0.3116364222860267, -0.4549839881341143 -0.3116199012607866))
2	131550000	135540000	2:131550000-135530000	271	-0.48433	-0.332403	-3.33298	0.0467391	3	0.353402	POLYGON ((-0.5153428293845297 -0.3080511317917847, -0.467990156704498 -0.3052798625927424, -0.455411158976583 -0.3116364222860267, -0.4788469415279136 -0.3612276778378077, -0.4872760461725764 -0.3587615555906278, -0.5153428293845297 -0.3080511317917847))
2	131550000	135540000	2:131550000-135530000	272	-0.511176	-0.347261	-3.33298	0.242355	3	0.194719	POLYGON ((-0.5562845835808696 -0.38256603839703, -0.562371212961744 -0.3649210681308614, -0.5638762385000504 -0.3597313635179595, -0.5648566032079239 -0.3544175117247983, -0.5653025470823778 -0.3490324147060841, -0.5652096305372953 -0.3436296836970688, -0.5645787786016481 -0.3382631054878728, -0.5634162717103869 -0.3329861069500772, -0.5617336831796866 -0.3278512231464763, -0.5595477639890074 -0.…
2	131550000	135540000	2:131550000-135530000	273	-0.499002	-0.382551	-3.33298	0.0907182	3	0.365355	POLYGON ((-0.5442991910188404 -0.4166928971526007, -0.5499872146289524 -0.4008105040299862, -0.5501979541999952 -0.4002110086631985, -0.5562845835808696 -0.38256603839703, -0.4872760461725764 -0.3587615555906278, -0.4788469415279136 -0.3612276778378077, -0.4671506681014084 -0.3764010109493057, -0.4672048803705614 -0.389082809945508, -0.5442991910188404 -0.4166928971526007))
2	131550000	135540000	2:131550000-135530000	274	-0.487626	-0.414316	-3.33298	0.135837	3	0.320955	POLYGON ((-0.4971749682385038 -0.4701814762715524, -0.5120850389489709 -0.4626339398229858, -0.5165483122046478 -0.4601021395696075, -0.5207519278664626 -0.4571592776894658, -0.5246581465724136 -0.4538317747068789, -0.5282318989408866 -0.4501495043899846, -0.5314411004177287 -0.4461455255490214, -0.5342569393260371 -0.4418557852398298, -0.5366541355326004 -0.4373187960371663, -0.5386111674087285 …
2	131550000	135540000	2:131550000-135530000	275	-0.457806	-0.429411	-1.35436	0.101118	4	-0.317308	POLYGON ((-0.4508146478760905 -0.483061235548069, -0.4523887425465327 -0.483295273683555, -0.4575136406744248 -0.4835661205291932, -0.4626411651087703 -0.4833506396477787, -0.467725269343686 -0.4826507661137907, -0.472720296797997 -0.4814727849739826, -0.4775813908232358 -0.4798272748060248, -0.4822648975280367 -0.477729012720119, -0.4971749682385038 -0.4701814762715524, -0.4611825934638202 -0.39…
2	131550000	135540000	2:131550000-135530000	276	-0.42758	-0.423441	-0.704574	0.0738385	4	-0.514365	POLYGON ((-0.4117097095380566 -0.4065964189848063, -0.4119485765943697 -0.4411289396960261, -0.4364511959175029 -0.4580290779374628, -0.4467174518063169 -0.406050532029482, -0.4173882717254184 -0.4004380708360132, -0.4117097095380566 -0.4065964189848063))
2	131550000	135540000	2:131550000-135530000	277	-0.396074	-0.423659	-3.33298	0.147297	3	0.233129	POLYGON ((-0.3587616690139879 -0.4266958273209074, -0.3646534922600058 -0.4352188232399559, -0.3813506548734561 -0.4450321046770606, -0.4119485765943697 -0.4411289396960261, -0.4117097095380566 -0.4065964189848063, -0.3725336626810142 -0.4096267103365117, -0.3587616690139879 -0.4266958273209074))
2	131550000	135540000	2:131550000-135530000	278	-0.400968	-0.462025	-3.33298	0.444111	2	-0.0376635	POLYGON ((-0.3960970806531598 -0.5182491798611184, -0.4116605604949388 -0.5151145872844037, -0.4169035819817105 -0.5137830138852936, -0.4219876069868398 -0.5119350280154383, -0.4268619102582344 -0.5095890677330728, -0.4314778590173443 -0.5067685395766388, -0.4357893981868997 -0.5035015850288446, -0.4397535098999426 -0.4998207997383827, -0.4433306427054544 -0.4957629083007398, -0.4464851061882336 …
2	131550000	135540000	2:131550000-135530000	279	-0.369841	-0.468294	-3.33298	0.443751	2	-0.0376635	POLYGON ((-0.3413738941520001 -0.5164727901259859, -0.3549251228446973 -0.5203552732825086, -0.35996035632402 -0.5215408913290664, -0.3650857393301684 -0.5222406880023224, -0.370254508290392 -0.5224482784150197, -0.3754195037820657 -0.5221617685293172, -0.3805336008113809 -0.5213837724378331, -0.3960970806531598 -0.5182491798611184, -0.3813506548734561 -0.4450321046770606, -0.3646534922600058 -0.…
2	131550000	135540000	2:131550000-135530000	280	-0.342738	-0.460529	-0.810968	0.149217	4	-0.441948	POLYGON ((-0.3012680247715853 -0.4990930948199742, -0.3155949541801285 -0.5073914727946656, -0.3195240420923975 -0.5094570265826187, -0.3236090942129838 -0.5111938608998065, -0.3278226654593029 -0.5125903069694632, -0.3413738941520001 -0.5164727901259859, -0.3646534922600058 -0.4352188232399559, -0.3587616690139879 -0.4266958273209074, -0.348801679554832 -0.4251369468306784, -0.3419881354010901 -…
2	131550000	135540000	2:131550000-135530000	281	-0.314085	-0.443932	-3.33298	0.128677	3	0.326766	POLYGON ((-0.259998944259232 -0.443110711940902, -0.2600006838621345 -0.4431096913289017, -0.2599806009782969 -0.4463041092057359, -0.2604892394292331 -0.4517042985818209, -0.2615355138495399 -0.4570265225726696, -0.2631089286547524 -0.4622173918854236, -0.2651937003107754 -0.4672248348969412, -0.2677689156646342 -0.4719986200044427, -0.2708087417324227 -0.4764908595181983, -0.2742826848399832 -0…
2	131550000	135540000	2:131550000-135530000	282	-0.315966	-0.410606	-3.33298	0.389672	3	0.0677926	POLYGON ((-0.2858947730467525 -0.4256246592125428, -0.3419881354010901 -0.4287909041658203, -0.348801679554832 -0.4251369468306784, -0.3237892536716394 -0.3800682150707999, -0.3167423766243788 -0.3769682520086706, -0.2858947730467525 -0.4256246592125428))
2	131550000	135540000	2:131550000-135530000	283	-0.28665	-0.39202	-3.33298	0.271375	2	-0.153174	POLYGON ((-0.26318794244666 -0.4376246434061818, -0.2858947730467525 -0.4256246592125428, -0.3167423766243788 -0.3769682520086706, -0.3122932765517678 -0.370662045824711, -0.2596225029468164 -0.3795732520969956, -0.2585106817948293 -0.3813452995222878, -0.26318794244666 -0.4376246434061818))
2	131550000	135540000	2:131550000-135530000	284	-0.281052	-0.358928	-1.31497	0.0838383	4	-0.277817	POLYGON ((-0.3122932765517678 -0.370662045824711, -0.3079156186474838 -0.3207749790049104, -0.301067657099556 -0.3140859992175243, -0.3000488592319165 -0.313978855762256, -0.2586866868946854 -0.3554847155877528, -0.2596225029468164 -0.3795732520969956, -0.3122932765517678 -0.370662045824711))
2	131550000	135540000	2:131550000-135530000	285	-0.255166	-0.333132	-0.933557	0.171137	4	-0.255337	POLYGON ((-0.3000488592319165 -0.313978855762256, -0.2926176924549447 -0.3100287209465184, -0.2438908061994645 -0.3035913660934897, -0.2376335140963512 -0.3413250704237057, -0.2586866868946854 -0.3554847155877528, -0.3000488592319165 -0.313978855762256))
2	131550000	135540000	2:131550000-135530000	286	-0.223684	-0.327911	-0.642087	0.207096	4	-0.277845	POLYGON ((-0.2224311514284315 -0.2869261456970927, -0.2148345763159425 -0.2851335613855284, -0.2094483163766209 -0.2860030242595322, -0.2159540471219956 -0.3499143699322857, -0.2376335140963512 -0.3413250704237057, -0.2438908061994645 -0.3035913660934897, -0.2224311514284315 -0.2869261456970927))
2	131550000	135540000	2:131550000-135530000	287	-0.187883	-0.344174	-3.33298	0.245415	3	0.15574	POLYGON ((-0.2102087029306892 -0.358512665229986, -0.2115190608236544 -0.3546343444062499, -0.1846435499644505 -0.3243413308374927, -0.1433489634404637 -0.3441430615563074, -0.1575732547526104 -0.3735213114346902, -0.2102087029306892 -0.358512665229986))
2	131550000	135540000	2:131550000-135530000	288	-0.198803	-0.38247	-1.69722	0.185116	4	-0.13599	POLYGON ((-0.1558721259793415 -0.4154051615518294, -0.1565898948306965 -0.4163956616961888, -0.1601802012588903 -0.4204327974329105, -0.1641548897585052 -0.4240921165684977, -0.1684744030898888 -0.4273372005096379, -0.1730957522177874 -0.4301357532504517, -0.1779729441505522 -0.4324599227916039, -0.1948311629756374 -0.4394843870518567, -0.2208658235790959 -0.3770030376949545, -0.2102087029306892 …
2	131550000	135540000	2:131550000-135530000	289	-0.232519	-0.396519	-3.33298	0.49721	3	0.00591865	POLYGON ((-0.1948311629756374 -0.4394843870518567, -0.2116893818007225 -0.4465088513121095, -0.2166498590456594 -0.448297659787793, -0.2217607908021882 -0.4495955607240435, -0.2269737209747744 -0.4503902488867554, -0.232239226433842 -0.4506741899382841, -0.2375073855901944 -0.4504446918695452, -0.2427282516952675 -0.4497039305226106, -0.2478523263799164 -0.4484589289618267, -0.2528310289421726 -0…
2	131550000	135540000	2:131550000-135530000	290	-0.236656	-0.360653	-0.748305	0.180336	4	-0.314306	POLYGON ((-0.2376335140963512 -0.3413250704237057, -0.2159540471219956 -0.3499143699322857, -0.2115190608236544 -0.3546343444062499, -0.2102087029306892 -0.358512665229986, -0.2208658235790959 -0.3770030376949545, -0.2585106817948293 -0.3813452995222878, -0.2596225029468164 -0.3795732520969956, -0.2586866868946854 -0.3554847155877528, -0.2376335140963512 -0.3413250704237057))
2	131550000	135540000	2:131550000-135530000	291	-0.203949	-0.32992	-3.33298	0.319454	3	0.0968778	POLYGON ((-0.2115190608236544 -0.3546343444062499, -0.2159540471219956 -0.3499143699322857, -0.2094483163766209 -0.2860030242595322, -0.2087038249318184 -0.2859538334610805, -0.1846435499644505 -0.3243413308374927, -0.2115190608236544 -0.3546343444062499))
2	131550000	135540000	2:131550000-135530000	292	-0.171207	-0.309399	-3.33298	0.218816	3	0.156806	POLYGON ((-0.1433489634404637 -0.3441430615563074, -0.1846435499644505 -0.3243413308374927, -0.2087038249318184 -0.2859538334610805, -0.2018100584978451 -0.2820239239197941, -0.1391445396712927 -0.3015875842908386, -0.1258174516234143 -0.3134696437208433, -0.1249095727258475 -0.3158912563688444, -0.14086975534538 -0.3421705545464974, -0.1433489634404637 -0.3441430615563074))
2	131550000	135540000	2:131550000-135530000	293	-0.161068	-0.276922	-3.33298	0.112398	3	0.25024	POLYGON ((-0.1925774881002185 -0.2692408712140472, -0.1544749447130902 -0.2522192915007118, -0.1391445396712927 -0.3015875842908386, -0.2018100584978451 -0.2820239239197941, -0.1925774881002185 -0.2692408712140472))
2	131550000	135540000	2:131550000-135530000	294	-0.135048	-0.268842	-3.33298	0.116638	3	0.262113	POLYGON ((-0.1544749447130902 -0.2522192915007118, -0.1481214672256675 -0.2427043710109515, -0.1374000433273464 -0.2387378157422311, -0.1148061658427341 -0.275176694133528, -0.1258174516234143 -0.3134696437208433, -0.1391445396712927 -0.3015875842908386, -0.1544749447130902 -0.2522192915007118))
2	131550000	135540000	2:131550000-135530000	295	-0.11148	-0.254229	-3.33298	0.0426391	3	0.433089	POLYGON ((-0.1028300654667794 -0.2008297292473979, -0.09972894465881031 -0.2013632367040495, -0.09467866797754738 -0.2027451286148794, -0.08978544327246421 -0.2046082635525823, -0.08509500982070169 -0.2069352259169347, -0.08065121131399512 -0.2097042644941882, -0.07649558603102719 -0.2128894957759138, -0.07266697855956308 -0.2164611459043522, -0.06920117669778408 -0.220385828982693, -0.0661305769…
2	131550000	135540000	2:131550000-135530000	296	-0.0942911	-0.280562	-2.78315	0.00809984	3	0.269599	POLYGON ((-0.1148061658427341 -0.275176694133528, -0.06138785439092787 -0.2403078207914832, -0.08727634194511999 -0.3094162722830981, -0.1004061015356675 -0.3170627836500734, -0.1249095727258475 -0.3158912563688444, -0.1258174516234143 -0.3134696437208433, -0.1148061658427341 -0.275176694133528))
2	131550000	135540000	2:131550000-135530000	297	-0.0630306	-0.292273	-3.33298	0.283214	3	0.205532	POLYGON ((-0.05820185247318821 -0.2362503677551044, -0.04403261031223615 -0.2415582605152345, -0.03913210218805781 -0.2436749637603876, -0.03446378854957124 -0.2462638361550607, -0.03007302616804251 -0.2492997245278656, -0.02600247516025996 -0.2527531325541811, -0.02229168450799394 -0.2565905073388789, -0.01897670780486835 -0.260774565412199, -0.0160897529640012 -0.2652646549714365, -0.0136588692…
2	131550000	135540000	2:131550000-135530000	298	-0.0656417	-0.329756	-0.993599	0.0537389	4	-0.483502	POLYGON ((-0.01031104365013619 -0.314777690792551, -0.01054929343867935 -0.3181978614081465, -0.02524315752510513 -0.3433942889827052, -0.05239720999380865 -0.3628127332646409, -0.06487331435393268 -0.3642352940808943, -0.1004061015356675 -0.3170627836500734, -0.08727634194511999 -0.3094162722830981, -0.01031104365013619 -0.314777690792551))
2	131550000	135540000	2:131550000-135530000	299	-0.0978013	-0.35398	-3.33298	0.00827983	3	0.49628	POLYGON ((-0.07556229590620618 -0.3739333628959195, -0.09304989995228864 -0.3763507168409249, -0.14086975534538 -0.3421705545464974, -0.1249095727258475 -0.3158912563688444, -0.1004061015356675 -0.3170627836500734, -0.06487331435393268 -0.3642352940808943, -0.07556229590620618 -0.3739333628959195))
2	131550000	135540000	2:131550000-135530000	300	-0.115754	-0.379097	-3.33298	0.098318	3	0.309442	POLYGON ((-0.1382304102463305 -0.4308156643668902, -0.1503301690502563 -0.4207785064877685, -0.1543157906953248 -0.4171213003822942, -0.1558607333513441 -0.4153894400564556, -0.1558721259793415 -0.4154051615518294, -0.1575732547526104 -0.3735213114346902, -0.1433489634404637 -0.3441430615563074, -0.14086975534538 -0.3421705545464974, -0.09304989995228864 -0.3763507168409249, -0.1382304102463305 -…
2	131550000	135540000	2:131550000-135530000	301	-0.0915544	-0.399171	-3.33298	0.374473	3	0.101209	POLYGON ((-0.07282990709639485 -0.4527103478662254, -0.08967711430377533 -0.4532946951913658, -0.09529949235613125 -0.4531975927414955, -0.1008814928321733 -0.452518008651886, -0.1063629337291492 -0.4512632698175686, -0.1116847172213665 -0.4494469041298975, -0.1167894668198493 -0.4470884946264029, -0.1216221459735074 -0.4442134683574476, -0.1261306514424046 -0.4408528222460119, -0.138230410246330…
2	131550000	135540000	2:131550000-135530000	302	-0.05786	-0.398003	-3.33298	0.261775	2	-0.168176	POLYGON ((-0.041874997263195 -0.4496826967009918, -0.04186554076566054 -0.4496628701921602, -0.04461562309404456 -0.4505140639025882, -0.05025632550553799 -0.451622103612687, -0.05598269988901437 -0.4521260005410851, -0.07282990709639485 -0.4527103478662254, -0.07556229590620618 -0.3739333628959195, -0.06487331435393268 -0.3642352940808943, -0.05239720999380865 -0.3628127332646409, -0.02563576090…
2	131550000	135540000	2:131550000-135530000	303	-0.0253971	-0.386033	-3.33298	0.260655	2	-0.153671	POLYGON ((-0.05239720999380865 -0.3628127332646409, -0.02524315752510513 -0.3433942889827052, 0.00219597927721564 -0.4050982199894804, -0.01133717125944353 -0.4299487723420652, -0.0256357609058455 -0.435390109362779, -0.05239720999380865 -0.3628127332646409))
2	131550000	135540000	2:131550000-135530000	304	0.00652065	-0.371839	-3.33298	0.199636	2	-0.196584	POLYGON ((-0.01054929343867935 -0.3181978614081465, -0.01071008376192924 -0.3205060705453469, -0.01054616160615334 -0.3204425820873676, -0.005444805005199885 -0.3190214299375104, -0.003836652754894314 -0.3186571141748976, 0.01645289349762328 -0.343337297390197, 0.02717174012122562 -0.3906521244918343, 0.00219597927721564 -0.4050982199894804, -0.02524315752510513 -0.3433942889827052, -0.0105492934…
2	131550000	135540000	2:131550000-135530000	305	0.0376988	-0.364776	-0.402189	0.234135	1	0.325215	POLYGON ((0.01645289349762328 -0.343337297390197, 0.05638109116611034 -0.3567742830668772, 0.05588754965785852 -0.3766801214627744, 0.03213743536814917 -0.391074058139706, 0.02717174012122562 -0.3906521244918343, 0.01645289349762328 -0.343337297390197))
2	131550000	135540000	2:131550000-135530000	306	0.0711395	-0.337928	-3.33298	0.0555789	2	-0.637237	POLYGON ((0.0561692094512147 -0.2844216296916489, 0.06857022591786346 -0.2838326248733541, 0.07380168043482713 -0.2838371127726039, 0.07900829321679097 -0.2843463473383887, 0.08414147865320437 -0.2853555766382471, 0.08915333632224962 -0.2868553830289294, 0.09399709797457909 -0.2888317710373229, 0.09862756395216266 -0.2912662979594867, 0.103001524969794 -0.2941362459591098, 0.1070781653233934 -0.2…
2	131550000	135540000	2:131550000-135530000	307	0.0463375	-0.339106	-1.02666	0.179956	1	0.309791	POLYGON ((-0.003836652754894314 -0.3186571141748976, -0.0037364886073825 -0.3186344226804945, -0.00240804177619916 -0.3155102763820014, 0.0001204442521294952 -0.3108770563136629, 0.003087956261505966 -0.3065119856073268, 0.006466305212078263 -0.3024565290158597, 0.01022339943483185 -0.2987492102005352, 0.01432354947731018 -0.2954252457864249, 0.01872780712546012 -0.2925162108320423, 0.02339433538…
2	131550000	135540000	2:131550000-135530000	308	0.0746439	-0.365692	-1.26914	0.154397	1	0.320165	POLYGON ((0.1247635413785216 -0.3452624978959235, 0.1247547833422331 -0.3453136613067895, 0.1260273482351109 -0.3485858438658814, 0.1274673312939278 -0.3537520248533531, 0.1283892695976515 -0.3590353010120561, 0.128784121597013 -0.3643838586777818, 0.1286480149354872 -0.3697452439634782, 0.1279822844259147 -0.3750668771802282, 0.1267934589598469 -0.380296568491981, 0.1250931974779963 -0.385383029…
2	131550000	135540000	2:131550000-135530000	309	0.0580242	-0.398313	-0.850128	0.275454	1	0.193013	POLYGON ((0.1145882907628431 -0.4065869250173618, 0.1062784068959502 -0.422897472568611, 0.103353977072406 -0.4279453422155756, 0.09990353628956636 -0.4326493549886978, 0.09596712375870239 -0.4369549251196373, 0.09159041794899905 -0.4408120904027034, 0.08900070293399004 -0.4428574730445317, 0.08900253693263452 -0.4428868277797727, 0.06449771224137085 -0.4320462914982139, 0.03213743536814917 -0.39…
2	131550000	135540000	2:131550000-135530000	310	0.033182	-0.417934	-0.513301	0.136757	1	0.45045	POLYGON ((-0.01133717125944353 -0.4299487723420652, 0.00219597927721564 -0.4050982199894804, 0.02717174012122562 -0.3906521244918343, 0.03213743536814917 -0.391074058139706, 0.06449771224137085 -0.4320462914982139, 0.001338902023390397 -0.43599227061794, -0.01133717125944353 -0.4299487723420652))
2	131550000	135540000	2:131550000-135530000	311	0.0351821	-0.449947	-3.33298	0.0536389	2	-0.397088	POLYGON ((0.08900253693263452 -0.4428868277797727, 0.08923266078052877 -0.4465701590886302, 0.08930733257708175 -0.4517707967457847, 0.08930141135923757 -0.4518430924567542, 0.06082820770414701 -0.4798791793627077, 0.03245679741870757 -0.4750755166709808, 0.001338902023390397 -0.43599227061794, 0.06449771224137085 -0.4320462914982139, 0.08900253693263452 -0.4428868277797727))
2	131550000	135540000	2:131550000-135530000	312	0.00735658	-0.472102	-1.09347	0.267955	1	0.148129	POLYGON ((-0.04638848395310118 -0.4658526338118789, -0.04579185238665183 -0.4617037814779885, -0.04447667934390995 -0.4564113603746499, -0.04263591537435534 -0.4512780389084051, -0.041874997263195 -0.4496826967009918, -0.0256357609058455 -0.435390109362779, -0.01133717125944353 -0.4299487723420652, 0.001338902023390397 -0.43599227061794, 0.03245679741870757 -0.4750755166709808, 0.0055102189540943…
2	131550000	135540000	2:131550000-135530000	313	0.0267581	-0.499701	-3.33298	0.292834	2	-0.124664	POLYGON ((0.06082820770414701 -0.4798791793627077, 0.05900942814872709 -0.4982852061438441, 0.02548679886823561 -0.5415695230891381, 0.01548849617053603 -0.5433588555383266, 0.005510218954094363 -0.4940185054028734, 0.03245679741870757 -0.4750755166709808, 0.06082820770414701 -0.4798791793627077))
2	131550000	135540000	2:131550000-135530000	314	-0.0118601	-0.50751	-0.854529	0.308214	4	-0.181983	POLYGON ((-0.06410037039335618 -0.4870508399660268, -0.06408616230525999 -0.4870551249116385, -0.05540789415089934 -0.4753163368328804, -0.05179572544545428 -0.4709315291346612, -0.04774409142739867 -0.4669492479930674, -0.04639150664200451 -0.4658736529644286, -0.04638848395310118 -0.4658526338118789, 0.005510218954094363 -0.4940185054028734, 0.01548849617053603 -0.5433588555383266, 0.0128665991…
2	131550000	135540000	2:131550000-135530000	315	-0.0304811	-0.532698	-1.83145	0.355933	4	-0.0440022	POLYGON ((-0.06339104436871135 -0.4930060880494548, -0.06352215211919063 -0.4887947208126632, 0.01286659912127249 -0.5452675068271822, 0.00483858012440861 -0.5573315296532433, -0.02996557013973227 -0.5796423781758721, -0.06339104436871135 -0.4930060880494548))
2	131550000	135540000	2:131550000-135530000	316	-0.0611135	-0.544517	-3.33298	0.324194	3	0.116644	POLYGON ((-0.08612998017811956 -0.5684041986614865, -0.06339104436871135 -0.4930060880494548, -0.02996557013973227 -0.5796423781758721, -0.03185056221781254 -0.582155652548647, -0.08612998017811956 -0.5684041986614865))
2	131550000	135540000	2:131550000-135530000	317	-0.0937682	-0.534669	-1.51457	0.336933	4	-0.0916695	POLYGON ((-0.142487032848875 -0.5054722261759083, -0.1296697984027648 -0.4941230645896138, -0.1253651195403767 -0.4906856597849316, -0.1207335119226282 -0.4877033414292294, -0.115822898168077 -0.4852069671677943, -0.1106840877341003 -0.4832223666479929, -0.1053702511983013 -0.4817700742633985, -0.09993637010972267 -0.4808651166871933, -0.09443866810218367 -0.4805168573932109, -0.08893402915593349…
2	131550000	135540000	2:131550000-135530000	318	-0.119403	-0.557367	-3.33298	0.332973	3	0.121874	POLYGON ((-0.156934403139646 -0.5147471122079564, -0.1490005619083181 -0.5112397023115327, -0.142487032848875 -0.5054722261759083, -0.08663958120639219 -0.568543835076422, -0.09572429588229796 -0.5776169339078965, -0.1261476498741896 -0.5843874507053907, -0.156934403139646 -0.5147471122079564))
2	131550000	135540000	2:131550000-135530000	319	-0.150672	-0.571191	-3.33298	0.199636	3	0.226065	POLYGON ((-0.180424393261265 -0.522857600641248, -0.1683901481337148 -0.5198114930282389, -0.156934403139646 -0.5147471122079564, -0.1261476498741896 -0.5843874507053907, -0.1312958398557633 -0.590613126795264, -0.1601180471551703 -0.5965926357961547, -0.1620379755455686 -0.5954967473553214, -0.180424393261265 -0.522857600641248))
2	131550000	135540000	2:131550000-135530000	320	-0.183599	-0.579525	-3.33298	0.162057	3	0.301806	POLYGON ((-0.2362670125572286 -0.5567614165437997, -0.2234226454820677 -0.5428242091004837, -0.2197061456406024 -0.5391623541290604, -0.2156545169002709 -0.5358751277216058, -0.211305364616432 -0.5329930404024347, -0.2066990556211984 -0.5305428423810947, -0.2018783435570582 -0.5285472752692186, -0.1968879720572202 -0.5270248610033396, -0.180424393261265 -0.522857600641248, -0.1620379755455686 -0.…
2	131550000	135540000	2:131550000-135530000	321	-0.209288	-0.6074	-3.33298	0.0890982	3	0.452572	POLYGON ((-0.2576062088787788 -0.6318107997980774, -0.257831526910661 -0.6314074660095461, -0.2599919977576136 -0.6264247492519359, -0.2616425503381971 -0.6212507008615715, -0.2627665854812812 -0.6159373548758283, -0.263352799062468 -0.6105381462111873, -0.2633952956866834 -0.6051073732824015, -0.2628936479766077 -0.5996996519376873, -0.2618529008706965 -0.5943693662015714, -0.2602835208875676 -0…
2	131550000	135540000	2:131550000-135530000	322	-0.177187	-0.617644	-3.33298	0.268815	2	-0.140393	POLYGON ((-0.1892661437528484 -0.6000768665168469, -0.1620379755455686 -0.5954967473553214, -0.1601180471551703 -0.5965926357961547, -0.1576414067464953 -0.6556543001214817, -0.1593648751763991 -0.6583204565208534, -0.205545130730266 -0.6510889812782517, -0.1892661437528484 -0.6000768665168469))
2	131550000	135540000	2:131550000-135530000	323	-0.141347	-0.616141	-3.33298	0.266615	2	-0.143071	POLYGON ((-0.1601180471551703 -0.5965926357961547, -0.1312958398557633 -0.590613126795264, -0.1187708669655484 -0.631073128535565, -0.1576414067464953 -0.6556543001214817, -0.1601180471551703 -0.5965926357961547))
2	131550000	135540000	2:131550000-135530000	324	-0.10858	-0.605997	-0.927068	0.237495	4	-0.21918	POLYGON ((-0.1261476498741896 -0.5843874507053907, -0.09572429588229796 -0.5776169339078965, -0.0889639255270278 -0.6254350249750108, -0.09369438130373467 -0.6337501821708614, -0.09430607850128829 -0.6340806226985298, -0.1187708669655484 -0.631073128535565, -0.1312958398557633 -0.590613126795264, -0.1261476498741896 -0.5843874507053907))
2	131550000	135540000	2:131550000-135530000	325	-0.0755047	-0.601321	-3.33298	0.411512	3	0.0542202	POLYGON ((-0.08663958120639219 -0.568543835076422, -0.08612998017811956 -0.5684041986614865, -0.03185056221781254 -0.582155652548647, -0.03150786485498734 -0.6008693846023127, -0.0889639255270278 -0.6254350249750108, -0.09572429588229796 -0.5776169339078965, -0.08663958120639219 -0.568543835076422))
2	131550000	135540000	2:131550000-135530000	326	-0.0622318	-0.632365	-3.33298	0.217616	2	-0.181674	POLYGON ((-0.0889639255270278 -0.6254350249750108, -0.03150786485498734 -0.6008693846023127, -0.01734655206516677 -0.6332677739215351, -0.01667311142449825 -0.655889829578799, -0.02889794021299906 -0.6703585502418993, -0.09369438130373467 -0.6337501821708614, -0.0889639255270278 -0.6254350249750108))
2	131550000	135540000	2:131550000-135530000	327	-0.078644	-0.661414	-0.995335	0.139697	1	0.308411	POLYGON ((-0.04097802338657672 -0.7019559607899822, -0.04076226052604141 -0.7000927772056924, -0.04101897268744108 -0.7003657854100223, -0.04493221579435772 -0.7037979737999432, -0.0491568830842148 -0.7068386275204037, -0.04951614867805313 -0.7070480187478072, -0.06104855404832213 -0.7113888870077784, -0.09840032488176328 -0.6760350512753788, -0.09430607850128829 -0.6340806226985298, -0.093694381…
2	131550000	135540000	2:131550000-135530000	328	-0.114957	-0.65787	-0.431028	0.180116	1	0.374439	POLYGON ((-0.1576414067464953 -0.6556543001214817, -0.1187708669655484 -0.631073128535565, -0.09430607850128829 -0.6340806226985298, -0.09840032488176328 -0.6760350512753788, -0.1494351215760695 -0.6800486047195164, -0.1593648751763991 -0.6583204565208534, -0.1576414067464953 -0.6556543001214817))
2	131550000	135540000	2:131550000-135530000	329	-0.111914	-0.696565	-0.71267	0.0276994	1	0.638442	POLYGON ((-0.1406802072413897 -0.7000534048683715, -0.1494629015941228 -0.6804788510143357, -0.1494351215760695 -0.6800486047195164, -0.09840032488176328 -0.6760350512753788, -0.06104855404832213 -0.7113888870077784, -0.08054196673776512 -0.7328903001295637, -0.1406802072413897 -0.7000534048683715))
2	131550000	135540000	2:131550000-135530000	330	-0.128062	-0.726139	-1.48991	0.0180596	1	0.356845	POLYGON ((-0.1507895577390327 -0.7502527699883802, -0.1406802072413897 -0.7000534048683715, -0.08054196673776512 -0.7328903001295637, -0.08806286603608124 -0.7518411087532326, -0.09799034162331308 -0.7580595976353636, -0.1327814264281454 -0.7600903651085065, -0.1507895577390327 -0.7502527699883802))
2	131550000	135540000	2:131550000-135530000	331	-0.162411	-0.719222	-0.122382	0.00837983	1	1.09659	POLYGON ((-0.1507895577390327 -0.7502527699883802, -0.1849681193470207 -0.7522060415723411, -0.1862132589966175 -0.7155497382292508, -0.1494629015941228 -0.6804788510143357, -0.1406802072413897 -0.7000534048683715, -0.1507895577390327 -0.7502527699883802))
2	131550000	135540000	2:131550000-135530000	332	-0.188768	-0.691602	-0.629575	0.146037	1	0.383698	POLYGON ((-0.1494629015941228 -0.6804788510143357, -0.1862132589966175 -0.7155497382292508, -0.2199044549745685 -0.6914074142231489, -0.2226120814259595 -0.685143935373941, -0.2200833992863876 -0.6546318143619128, -0.205545130730266 -0.6510889812782517, -0.1593648751763991 -0.6583204565208534, -0.1494351215760695 -0.6800486047195164, -0.1494629015941228 -0.6804788510143357))
2	131550000	135540000	2:131550000-135530000	333	-0.209711	-0.720828	-1.04551	0.0133797	1	0.562839	POLYGON ((-0.1868706702402282 -0.7537790171576226, -0.2202137898516715 -0.7469610688649519, -0.2293870895580457 -0.7364531685171721, -0.2199044549745685 -0.6914074142231489, -0.1862132589966175 -0.7155497382292508, -0.1849681193470207 -0.7522060415723411, -0.1868706702402282 -0.7537790171576226))
2	131550000	135540000	2:131550000-135530000	334	-0.241094	-0.714222	-3.33298	0.0182596	2	-0.496041	POLYGON ((-0.2636074885517995 -0.7308979244784582, -0.2628142075447182 -0.7078377085457026, -0.2226120814259595 -0.685143935373941, -0.2199044549745685 -0.6914074142231489, -0.2293870895580457 -0.7364531685171721, -0.2636074885517995 -0.7308979244784582))
2	131550000	135540000	2:131550000-135530000	335	-0.257057	-0.685943	-3.33298	0.129997	2	-0.347358	POLYGON ((-0.3085096341153384 -0.6602757718512839, -0.2945772171674421 -0.6468901155924932, -0.2906649974409031 -0.6434765720224744, -0.2864438677761517 -0.6404533606096731, -0.2819526270699865 -0.6378482694764452, -0.2772325569693826 -0.6356852435546118, -0.2723270424274833 -0.6339841644934419, -0.2672811729268609 -0.6327606679156673, -0.2621413280354423 -0.6320259997012362, -0.2576028631754877 …
2	131550000	135540000	2:131550000-135530000	336	-0.284922	-0.712714	-0.882834	0.167617	1	0.465607	POLYGON ((-0.3418003186794251 -0.7093750732410644, -0.3353225816136435 -0.6928988101923067, -0.3329004617555207 -0.6875957457970111, -0.3299223168437583 -0.6825837791697971, -0.3264226607254881 -0.6779209942035329, -0.3224420510632346 -0.6736614281100748, -0.3085096341153384 -0.6602757718512839, -0.2628142075447182 -0.7078377085457026, -0.2636074885517995 -0.7308979244784582, -0.2706855693926887 …
2	131550000	135540000	2:131550000-135530000	337	-0.297877	-0.745667	-1.20669	0.139497	1	0.408588	POLYGON ((-0.3379527212440103 -0.7855413943924938, -0.3456137449641805 -0.771242275925461, -0.3478511054721565 -0.766535293065707, -0.3496256569680896 -0.7616350444319184, -0.3509209652345168 -0.7565869114919503, -0.3517250343514657 -0.751437645278223, -0.3520304177913189 -0.7462349334238793, -0.351834287381509 -0.741026958525033, -0.351138459496378 -0.7358619519191379, -0.3499493782356364 -0.730…
2	131550000	135540000	2:131550000-135530000	338	-0.282555	-0.774265	-1.29959	0.0328393	1	0.543353	POLYGON ((-0.2798937957241904 -0.8283349185123525, -0.2798993416938435 -0.8283068734529423, -0.2811610013325436 -0.8284028983756468, -0.2865958014050914 -0.8282699189776747, -0.2919898857911719 -0.8275927269925678, -0.2972888979302835 -0.8263781465306805, -0.3024394393115163 -0.8246384170031222, -0.3073896075740309 -0.8223910697843677, -0.3120895195307289 -0.8196587515473871, -0.3164918138445713 …
2	131550000	135540000	2:131550000-135530000	339	-0.247525	-0.75384	-0.588233	0.0364793	1	0.720889	POLYGON ((-0.2728486561063575 -0.7506606576219731, -0.2706855693926887 -0.7373342437165074, -0.2636074885517995 -0.7308979244784582, -0.2293870895580457 -0.7364531685171721, -0.2202137898516715 -0.7469610688649519, -0.2518496987050313 -0.7866746138871515, -0.2728486561063575 -0.7506606576219731))
2	131550000	135540000	2:131550000-135530000	340	-0.220812	-0.775119	-0.958393	0.0197196	1	0.598174	POLYGON ((-0.2518496987050313 -0.7866746138871515, -0.2202137898516715 -0.7469610688649519, -0.1868706702402282 -0.7537790171576226, -0.1879167409063141 -0.7626811290882004, -0.2098858250768901 -0.7976179009684723, -0.2519081987183718 -0.7909031278635879, -0.2518496987050313 -0.7866746138871515))
2	131550000	135540000	2:131550000-135530000	341	-0.22728	-0.815591	-3.33298	0.0357793	2	-0.558681	POLYGON ((-0.238386277726526 -0.8715663037043208, -0.2540294054754441 -0.8626798003708297, -0.2586432518730352 -0.8597410378359835, -0.2629370964297322 -0.8563518192328688, -0.2668671292996343 -0.8525467245614756, -0.2703932525862889 -0.8483645769810945, -0.2734794894591941 -0.8438480466998836, -0.2760943512233049 -0.8390432156132202, -0.2782111585963543 -0.8339991071328067, -0.2798083139160162 -…
2	131550000	135540000	2:131550000-135530000	342	-0.195993	-0.833364	-0.886756	0.459551	4	-0.0500454	POLYGON ((-0.1629652022239952 -0.8762353974089835, -0.1665755779402089 -0.8788338263329103, -0.1712219053267852 -0.8815229851086398, -0.1761116496549554 -0.8837389123433338, -0.1811967617118952 -0.8854598331644924, -0.1864272724981924 -0.8866688368943296, -0.1917517842496525 -0.8873540432230334, -0.1971179754989017 -0.8875087189509704, -0.2024731152137864 -0.887131344152666, -0.2077645809603725 -…
2	131550000	135540000	2:131550000-135530000	343	-0.184874	-0.797718	-0.470982	0.0705186	1	0.57756	POLYGON ((-0.2098858250768901 -0.7976179009684723, -0.1879167409063141 -0.7626811290882004, -0.1635381077845168 -0.8041942337022358, -0.1758638982598205 -0.820085875253896, -0.2041323177603507 -0.8112682256472563, -0.2098858250768901 -0.7976179009684723))
2	131550000	135540000	2:131550000-135530000	344	-0.1588	-0.782406	-3.33298	0.00681986	2	-0.543528	POLYGON ((-0.1879167409063141 -0.7626811290882004, -0.1868706702402282 -0.7537790171576226, -0.1849681193470207 -0.7522060415723411, -0.1507895577390327 -0.7502527699883802, -0.1327814264281454 -0.7600903651085065, -0.1456589936250912 -0.801198752411749, -0.1635381077845168 -0.8041942337022358, -0.1879167409063141 -0.7626811290882004))
2	131550000	135540000	2:131550000-135530000	345	-0.151958	-0.823249	-3.33298	0.190816	2	-0.234191	POLYGON ((-0.1367716127102451 -0.8751975452883425, -0.1368059272422225 -0.875176745103997, -0.1389889595632661 -0.875828779975658, -0.1441346978675858 -0.8768365004085543, -0.1493537718581529 -0.8773418615154929, -0.1545972554477824 -0.8773401258005841, -0.1598159937220733 -0.8768313095352468, -0.1629401200059391 -0.8762173454481916, -0.1629652022239952 -0.8762353974089835, -0.1758638982598205 -0…
2	131550000	135540000	2:131550000-135530000	346	-0.124144	-0.793262	-1.67303	0.104378	1	0.168495	POLYGON ((-0.1456589936250912 -0.801198752411749, -0.1327814264281454 -0.7600903651085065, -0.09799034162331308 -0.7580595976353636, -0.1045728935596316 -0.8055666011570036, -0.1300516953068859 -0.8156750199330439, -0.1456589936250912 -0.801198752411749))
2	131550000	135540000	2:131550000-135530000	347	-0.110386	-0.827942	-3.33298	0.304074	2	-0.127805	POLYGON ((-0.1107823137165962 -0.8820774119023934, -0.1107899018675474 -0.8820699421488905, -0.1155878977950828 -0.8818474006519339, -0.1209284982228339 -0.881061720307285, -0.1261643514688711 -0.8797482716715075, -0.1312434371155542 -0.8779201044126057, -0.136115292297682 -0.875595382145917, -0.1367716127102451 -0.8751975452883425, -0.1300516953068859 -0.8156750199330439, -0.1045728935596316 -0.…
2	131550000	135540000	2:131550000-135530000	348	-0.0823932	-0.799047	-0.75963	0.48391	1	0.00438471	POLYGON ((-0.08806286603608124 -0.7518411087532326, -0.06180264068288204 -0.7798645123554837, -0.06012837379273364 -0.817133265431696, -0.08735731345475142 -0.8222447494358912, -0.1045728935596316 -0.8055666011570036, -0.09799034162331308 -0.7580595976353636, -0.08806286603608124 -0.7518411087532326))
2	131550000	135540000	2:131550000-135530000	349	-0.0743182	-0.842063	-3.33298	0.281094	3	0.174342	POLYGON ((-0.08290387462541257 -0.8980644714671707, -0.09788951928014397 -0.8908197840024608, -0.1023383496527032 -0.8884063354753788, -0.1065424415739504 -0.8855881025903281, -0.1104650748750124 -0.8823897008860266, -0.1107823137165962 -0.8820774119023934, -0.08735731345475142 -0.8222447494358912, -0.06012837379273364 -0.817133265431696, -0.05395965075471707 -0.8219024504572252, -0.0514381828834…
2	131550000	135540000	2:131550000-135530000	350	-0.044347	-0.856552	-1.26894	0.0769785	4	-0.459727	POLYGON ((0.00894713503380154 -0.874683989730802, 0.0002137894532581175 -0.8873287305625829, -0.003123176788549155 -0.8916727458595967, -0.006881898145113807 -0.8956574448900575, -0.01102391962833846 -0.8992420607177518, -0.01550686475650857 -0.9023899196055463, -0.02028486910255138 -0.9050688162196109, -0.02530904952700898 -0.9072513431179899, -0.03052800429506427 -0.9089151711525668, -0.0358883…
2	131550000	135540000	2:131550000-135530000	351	-0.0268803	-0.831262	-3.33298	0.0819584	3	0.350521	POLYGON ((0.02054444048444643 -0.8573863652619184, 0.02042652034620837 -0.8576241510556322, 0.01768048061434499 -0.8620392488990211, 0.00894713503380154 -0.874683989730802, -0.05143818288344293 -0.8329776505991361, -0.05395965075471707 -0.8219024504572252, -0.01669285693180145 -0.8080445455869059, 0.02054444048444643 -0.8573863652619184))
2	131550000	135540000	2:131550000-135530000	352	-0.039575	-0.797124	-3.33298	0.48341	3	0.0104105	POLYGON ((-0.06180264068288204 -0.7798645123554837, -0.02542022931002568 -0.7781239748428865, -0.01378202443461083 -0.789393089021145, -0.01669285693180145 -0.8080445455869059, -0.05395965075471707 -0.8219024504572252, -0.06012837379273364 -0.817133265431696, -0.06180264068288204 -0.7798645123554837))
2	131550000	135540000	2:131550000-135530000	353	-0.0413241	-0.760562	-3.33298	0.0748185	2	-0.343473	POLYGON ((-0.04149753861937094 -0.7064421464622024, -0.04128565465216091 -0.704612458403282, -0.03569447920309646 -0.7094811417141731, -0.0219278684720741 -0.7352054042673362, -0.02542022931002568 -0.7781239748428865, -0.06180264068288204 -0.7798645123554837, -0.08806286603608124 -0.7518411087532326, -0.08054196673776512 -0.7328903001295637, -0.06104855404832213 -0.7113888870077784, -0.0495161486…
2	131550000	135540000	2:131550000-135530000	354	-0.00688634	-0.763364	-3.33298	0.48119	2	-0.0082835	POLYGON ((0.01831414749751507 -0.7575896317992588, 0.02058688085113671 -0.7675924532906807, 0.01395331852060571 -0.779095876883405, -0.01378202443461083 -0.789393089021145, -0.02542022931002568 -0.7781239748428865, -0.0219278684720741 -0.7352054042673362, 0.01831414749751507 -0.7575896317992588))
2	131550000	135540000	2:131550000-135530000	355	0.00842878	-0.804615	-3.33298	0.373293	3	0.0759209	POLYGON ((0.02997020213729915 -0.8543647390427496, 0.0298777644663915 -0.8542832431483474, 0.02848426580583791 -0.8549209747999528, 0.02337925460063938 -0.8566668824193029, 0.02057593614164006 -0.8573228543132694, 0.02054444048444643 -0.8573863652619184, -0.01669285693180145 -0.8080445455869059, -0.01378202443461083 -0.789393089021145, 0.01395331852060571 -0.779095876883405, 0.03595405130635518 -…
2	131550000	135540000	2:131550000-135530000	356	0.0380075	-0.789253	-2.1044	0.165917	4	-0.0385526	POLYGON ((0.05127303113615508 -0.7721350843263143, 0.0500285626753813 -0.8054915340831459, 0.03595405130635518 -0.8214557131336173, 0.01395331852060571 -0.779095876883405, 0.02058688085113671 -0.7675924532906807, 0.05127303113615508 -0.7721350843263143))
2	131550000	135540000	2:131550000-135530000	357	0.0676456	-0.815383	-3.33298	0.206296	3	0.215297	POLYGON ((0.08877658350171549 -0.865230767010046, 0.08867167209402925 -0.8652205563136133, 0.08642129361800006 -0.8661799257696511, 0.08136762892160788 -0.8677715432934366, 0.07618262030450453 -0.8688617078893331, 0.07091589750174188 -0.8694399847472846, 0.06561787239815862 -0.8695008387314086, 0.06033925649716899 -0.8690436873610708, 0.05513057552167012 -0.8680729063862582, 0.05004168579319847 -…
2	131550000	135540000	2:131550000-135530000	358	0.0930109	-0.780557	-1.1517	0.288334	4	-0.141384	POLYGON ((0.08206223428003703 -0.7975649541800708, 0.0706161578564297 -0.762186891653602, 0.07740515547452903 -0.7504628389269392, 0.1231767511512856 -0.7780093219426725, 0.1236128753236929 -0.7807713107456746, 0.1145844791397816 -0.7938367144233434, 0.08206223428003703 -0.7975649541800708))
2	131550000	135540000	2:131550000-135530000	359	0.111304	-0.750161	-3.33298	0.362353	2	-0.0790582	POLYGON ((0.07740515547452903 -0.7504628389269392, 0.07696361157567004 -0.7333324496860532, 0.1114553240520383 -0.7191410476244972, 0.1349168003978177 -0.7548641710696387, 0.1231767511512856 -0.7780093219426725, 0.07740515547452903 -0.7504628389269392))
2	131550000	135540000	2:131550000-135530000	360	0.139982	-0.731326	-0.571877	0.374693	4	-0.203402	POLYGON ((0.1748364487014882 -0.6868846899909116, 0.1736435449349654 -0.6889305637748161, 0.1740485961591022 -0.6892270098151853, 0.1779669743524499 -0.692725397134809, 0.1815279945208302 -0.6965869430512258, 0.184698154636692 -0.700775318194883, 0.1874476298783491 -0.7052511183914648, 0.1897505532214821 -0.7099722353758087, 0.1915852587957388 -0.7148942529458706, 0.1979240870056792 -0.7348003264…
2	131550000	135540000	2:131550000-135530000	361	0.15266	-0.771139	-0.654826	0.252315	4	-0.364175	POLYGON ((0.1979240870056792 -0.7348003264991635, 0.2042629152156196 -0.7547064000524564, 0.2055736491647523 -0.7596049775489315, 0.2064204608582398 -0.764604677032916, 0.2067959258325506 -0.7696616633911582, 0.2066967521798964 -0.7747315992448944, 0.2061238094101965 -0.7797700336800172, 0.2050821208276071 -0.784732791972669, 0.2035808194884521 -0.7895763628933259, 0.2016330681266994 -0.794258280…
2	131550000	135540000	2:131550000-135530000	362	0.134635	-0.80932	-3.33298	0.442511	2	-0.0348553	POLYGON ((0.192620492498917 -0.8133490935036279, 0.1836079168711346 -0.8324399068135954, 0.1811348467588602 -0.8370804707959409, 0.1782233785316769 -0.8414593134074732, 0.1749009613230272 -0.8455351512043114, 0.1711989186666731 -0.8492695574522982, 0.1671521531804534 -0.8526273244117534, 0.1627988175066688 -0.8555767952737593, 0.1581799546114464 -0.8580901626184994, 0.1533391108343202 -0.86014373…
2	131550000	135540000	2:131550000-135530000	363	0.0965756	-0.811654	-3.33298	0.431811	3	0.0556687	POLYGON ((0.1189192987213272 -0.8645414411355329, 0.09988964488821347 -0.8657081257392596, 0.09417892124927717 -0.8657565595047205, 0.08877658350171549 -0.865230767010046, 0.08038930919128595 -0.8001647438617776, 0.08206223428003703 -0.7975649541800708, 0.1145844791397816 -0.7938367144233434, 0.1189192987213272 -0.8645414411355329))
2	131550000	135540000	2:131550000-135530000	364	0.0632262	-0.790194	-3.33298	0.237615	3	0.155285	POLYGON ((0.0500285626753813 -0.8054915340831459, 0.05127303113615508 -0.7721350843263143, 0.0706161578564297 -0.762186891653602, 0.08206223428003703 -0.7975649541800708, 0.08038930919128595 -0.8001647438617776, 0.0500285626753813 -0.8054915340831459))
2	131550000	135540000	2:131550000-135530000	365	0.0435358	-0.751908	-0.797272	0.104898	4	-0.390746	POLYGON ((0.0706161578564297 -0.762186891653602, 0.05127303113615508 -0.7721350843263143, 0.02058688085113671 -0.7675924532906807, 0.01831414749751507 -0.7575896317992588, 0.03978435315890664 -0.7191584004226226, 0.06297793916836752 -0.7215756845153385, 0.07696361157567004 -0.7333324496860532, 0.07740515547452903 -0.7504628389269392, 0.0706161578564297 -0.762186891653602))
2	131550000	135540000	2:131550000-135530000	366	0.00992943	-0.733133	-0.909861	0.359713	4	-0.108313	POLYGON ((0.03857494215115618 -0.718081787907502, 0.03978435315890664 -0.7191584004226226, 0.01831414749751507 -0.7575896317992588, -0.0219278684720741 -0.7352054042673362, -0.03569447920309646 -0.7094811417141731, 0.03857494215115618 -0.718081787907502))
2	131550000	135540000	2:131550000-135530000	367	0.0141275	-0.696882	-0.620402	0.404792	4	-0.10167	POLYGON ((-0.04128565465216091 -0.704612458403282, -0.04097802338657672 -0.7019559607899822, -0.02889794021299906 -0.6703585502418993, -0.01667311142449825 -0.655889829578799, 0.02512884778734175 -0.6641512710272762, 0.03857494215115618 -0.718081787907502, -0.03569447920309646 -0.7094811417141731, -0.04128565465216091 -0.704612458403282))
2	131550000	135540000	2:131550000-135530000	368	0.0502083	-0.687886	-3.33298	0.310914	3	0.113203	POLYGON ((0.03857494215115618 -0.718081787907502, 0.02512884778734175 -0.6641512710272762, 0.0429484755428441 -0.6571682962877804, 0.07686283599672089 -0.6630338581859314, 0.06297793916836752 -0.7215756845153385, 0.03978435315890664 -0.7191584004226226, 0.03857494215115618 -0.718081787907502))
2	131550000	135540000	2:131550000-135530000	369	0.0895172	-0.697209	-2.16036	0.446791	4	-0.00445481	POLYGON ((0.1114553240520383 -0.7191410476244972, 0.07696361157567004 -0.7333324496860532, 0.06297793916836752 -0.7215756845153385, 0.07686283599672089 -0.6630338581859314, 0.08435804621068094 -0.6597204439483947, 0.1194339835434324 -0.7073392132558274, 0.1114553240520383 -0.7191410476244972))
2	131550000	135540000	2:131550000-135530000	370	0.118631	-0.675764	-3.33298	0.49517	3	0.00591236	POLYGON ((0.1723735102994322 -0.6869956435990421, 0.1194339835434324 -0.7073392132558274, 0.08435804621068094 -0.6597204439483947, 0.08629243303551121 -0.6572096397633249, 0.1063969346684805 -0.6485261611746507, 0.1723735102994322 -0.6869956435990421))
2	131550000	135540000	2:131550000-135530000	371	0.136128	-0.645757	-3.33298	0.216096	3	0.265622	POLYGON ((0.1823716426843091 -0.6129459718521323, 0.1875969728016132 -0.628911305478443, 0.1889484920930834 -0.6338060380587612, 0.1898356240498695 -0.6388058388867236, 0.1902505692447612 -0.6438667510489017, 0.1901896795904373 -0.6489442803573391, 0.1896534904124748 -0.6539937865305684, 0.1886467157429098 -0.6589708756590417, 0.1871782068757268 -0.663831790504526, 0.1852608745486462 -0.668533795…
2	131550000	135540000	2:131550000-135530000	372	0.125677	-0.613826	-3.33298	0.232675	3	0.190122	POLYGON ((0.1659579299104542 -0.5733437661016153, 0.157892357118531 -0.570354395825895, 0.1589493176051386 -0.5710965814875024, 0.1630024738580098 -0.5745874999243799, 0.1666914628632705 -0.5784612509827448, 0.1699802929505926 -0.5826800403588389, 0.1728368766054563 -0.5872027073779643, 0.1752333435314133 -0.5919851265791545, 0.1771463125670049 -0.5969806382258216, 0.1823716426843091 -0.612945971…
2	131550000	135540000	2:131550000-135530000	373	0.0949542	-0.620946	-3.33298	0.0147797	3	0.532252	POLYGON ((0.1022405898112244 -0.5825437899608187, 0.1144393240559834 -0.6351796939136563, 0.1063969346684805 -0.6485261611746507, 0.08629243303551121 -0.6572096397633249, 0.06985528771793341 -0.598315429032195, 0.07139204507126505 -0.5962781418721124, 0.1022405898112244 -0.5825437899608187))
2	131550000	135540000	2:131550000-135530000	374	0.0601034	-0.630673	-3.33298	0.050239	3	0.391089	POLYGON ((0.07686283599672089 -0.6630338581859314, 0.0429484755428441 -0.6571682962877804, 0.04442078230863821 -0.607878872149723, 0.06985528771793341 -0.598315429032195, 0.08629243303551121 -0.6572096397633249, 0.08435804621068094 -0.6597204439483947, 0.07686283599672089 -0.6630338581859314))
2	131550000	135540000	2:131550000-135530000	375	0.0274055	-0.629696	-3.33298	0.181516	3	0.220604	POLYGON ((-0.01667311142449825 -0.655889829578799, -0.01734655206516677 -0.6332677739215351, 0.03752391145380507 -0.6059489546500579, 0.04442078230863821 -0.607878872149723, 0.0429484755428441 -0.6571682962877804, 0.02512884778734175 -0.6641512710272762, -0.01667311142449825 -0.655889829578799))
2	131550000	135540000	2:131550000-135530000	376	0.012476	-0.59971	-3.33298	0.245375	3	0.145983	POLYGON ((-0.03185056221781254 -0.582155652548647, -0.02996557013973227 -0.5796423781758721, 0.00483858012440861 -0.5573315296532433, 0.03752391145380507 -0.6059489546500579, -0.01734655206516677 -0.6332677739215351, -0.03150786485498734 -0.6008693846023127, -0.03185056221781254 -0.582155652548647))
2	131550000	135540000	2:131550000-135530000	377	0.0412002	-0.580399	-3.33298	0.0795984	3	0.309523	POLYGON ((0.03752391145380507 -0.6059489546500579, 0.00483858012440861 -0.5573315296532433, 0.01286659912127249 -0.5452675068271822, 0.01548849617053603 -0.5433588555383266, 0.02548679886823561 -0.5415695230891381, 0.04014057314422992 -0.5486759162980646, 0.07139204507126505 -0.5962781418721124, 0.06985528771793341 -0.598315429032195, 0.04442078230863821 -0.607878872149723, 0.03752391145380507 -0…
2	131550000	135540000	2:131550000-135530000	378	0.0688267	-0.562262	-3.33298	0.0939581	3	0.327109	POLYGON ((0.1094828966402297 -0.5455602549819921, 0.1230528257042497 -0.5595981411898584, 0.1022405898112244 -0.5825437899608187, 0.07139204507126505 -0.5962781418721124, 0.04014057314422992 -0.5486759162980646, 0.1020445118785134 -0.5427140775705194, 0.1094828966402297 -0.5455602549819921))
2	131550000	135540000	2:131550000-135530000	379	0.0657067	-0.529865	-1.52052	0.200996	4	-0.143856	POLYGON ((0.05900942814872709 -0.4982852061438441, 0.1020445118785134 -0.5427140775705194, 0.04014057314422992 -0.5486759162980646, 0.02548679886823561 -0.5415695230891381, 0.05900942814872709 -0.4982852061438441))
2	131550000	135540000	2:131550000-135530000	380	0.09036	-0.505985	-0.832481	0.396532	1	0.0873888	POLYGON ((0.08930141135923757 -0.4518430924567542, 0.08930044885036591 -0.4518548443066308, 0.08964389035651395 -0.4518340447621126, 0.1082402129968027 -0.4515881277370278, 0.1094828966402297 -0.5455602549819921, 0.1020445118785134 -0.5427140775705194, 0.05900942814872709 -0.4982852061438441, 0.06082820770414701 -0.4798791793627077, 0.08930141135923757 -0.4518430924567542))
2	131550000	135540000	2:131550000-135530000	381	0.127553	-0.505493	-3.33298	0.334053	2	-0.113075	POLYGON ((0.1082402129968027 -0.4515881277370278, 0.1268365356370914 -0.4513422107119429, 0.1316965306790781 -0.4514962501445983, 0.1365231197371419 -0.4520855870766899, 0.1412773933510823 -0.4531054705792225, 0.1603292417785338 -0.458096731757583, 0.1336893460270656 -0.5597823053718224, 0.1230528257042497 -0.5595981411898584, 0.1094828966402297 -0.5455602549819921, 0.1082402129968027 -0.45158812…
2	131550000	135540000	2:131550000-135530000	382	0.165656	-0.515476	-1.40885	0.294654	1	0.1451	POLYGON ((0.1603292417785338 -0.458096731757583, 0.1793810902059852 -0.4630879929359436, 0.184477218681894 -0.4646956261235849, 0.2025360731417758 -0.4713888398764865, 0.1650496762719976 -0.5725302960272367, 0.1336893460270656 -0.5597823053718224, 0.1603292417785338 -0.458096731757583))
2	131550000	135540000	2:131550000-135530000	383	0.201774	-0.528862	-1.24057	0.172097	1	0.340797	POLYGON ((0.2025360731417758 -0.4713888398764865, 0.2205949276016575 -0.478082053629388, 0.2255322893232833 -0.4801960362881363, 0.2302359749668087 -0.482788680656066, 0.2346597210815034 -0.4858344865862571, 0.2496107135101515 -0.4972613378634475, 0.1838393419749005 -0.5833171772186186, 0.1753395802236451 -0.5768209185998903, 0.1659579299104542 -0.5733437661016153, 0.1650496762719976 -0.572530296…
2	131550000	135540000	2:131550000-135530000	384	0.231676	-0.551716	-0.75331	0.202276	1	0.414708	POLYGON ((0.2496107135101515 -0.4972613378634475, 0.2504992131545755 -0.4979404067175803, 0.2475390774560126 -0.60632552327823, 0.2301975026282495 -0.605851902763293, 0.224574077876811 -0.6054044000541652, 0.2190277128870585 -0.6043743515066607, 0.2136185885991658 -0.6027729336823884, 0.208405396820427 -0.6006175227963022, 0.2034447033886711 -0.5979315061757463, 0.1987903344035486 -0.594744028495…
2	131550000	135540000	2:131550000-135530000	385	0.266359	-0.552663	-1.27696	0.0755985	1	0.462001	POLYGON ((0.2504992131545755 -0.4979404067175803, 0.2506533747183494 -0.4980582304186028, 0.2509903298177065 -0.498067433091904, 0.252942612605939 -0.4967991975189222, 0.2982649213685005 -0.5665669640168061, 0.2862166259712667 -0.6052950607227258, 0.2855209118627182 -0.6032828932140484, 0.2810338178445267 -0.6047932348061584, 0.2757258858761432 -0.6060031551592989, 0.2703232987847277 -0.606674051…
2	131550000	135540000	2:131550000-135530000	386	0.29853	-0.531764	-0.759051	0.175876	1	0.410381	POLYGON ((0.252942612605939 -0.4967991975189222, 0.2639073217572058 -0.4896763389469702, 0.2724871214955708 -0.4808303344566091, 0.3289444776848827 -0.5355887070517907, 0.326909824589997 -0.5431433097583424, 0.2982649213685005 -0.5665669640168061, 0.252942612605939 -0.4967991975189222))
2	131550000	135540000	2:131550000-135530000	387	0.324193	-0.505306	-3.33298	0.232295	2	-0.294902	POLYGON ((0.2724871214955708 -0.4808303344566091, 0.2853184282496896 -0.467600911786452, 0.289099960393645 -0.4640581246832404, 0.2932027796282864 -0.4608929706360718, 0.2975893233857169 -0.4581344276005914, 0.302219431513052 -0.4558077508839771, 0.3070507139509311 -0.45393424192486, 0.3120389388275062 -0.4525310532721237, 0.3171384374147892 -0.4516110315480603, 0.3223025222398574 -0.451182599833…
2	131550000	135540000	2:131550000-135530000	388	0.361339	-0.514879	-3.33298	0.309474	2	-0.192099	POLYGON ((0.3562822569796764 -0.4576503357515663, 0.3748553655878746 -0.4624372797368391, 0.3798388258592443 -0.4639812032228031, 0.3846505995936209 -0.4659974892977423, 0.3892460310032685 -0.4684674257677866, 0.3935824720708627 -0.4713680903251101, 0.3976196783454934 -0.4746725632789885, 0.4013201824323081 -0.4783501773846687, 0.4046496417096169 -0.4823668024515094, 0.407577157046461 -0.48668516…
2	131550000	135540000	2:131550000-135530000	389	0.357165	-0.547556	-0.64588	0.258975	1	0.332823	POLYGON ((0.4129718251311714 -0.538079448820218, 0.4108849354003365 -0.5544179078203547, 0.4100340088898411 -0.5592943216024971, 0.4087413766559097 -0.564072667467829, 0.4070178383573637 -0.5687130233846072, 0.4048777937786899 -0.5731766201968452, 0.4023391225230001 -0.5774261655321096, 0.3994230346318673 -0.5814261553711119, 0.3961538933800811 -0.585143170676004, 0.3944599227151235 -0.5869003141…
2	131550000	135540000	2:131550000-135530000	390	0.332427	-0.573217	-3.33298	0.0378792	2	-0.55018	POLYGON ((0.2875074185540573 -0.6090283340078572, 0.2862166259712667 -0.6052950607227258, 0.2982649213685005 -0.5665669640168061, 0.326909824589997 -0.5431433097583424, 0.3668101444176528 -0.5816091330756632, 0.2875074185540573 -0.6090283340078572))
2	131550000	135540000	2:131550000-135530000	391	0.344954	-0.609446	-1.24122	0.112738	1	0.43974	POLYGON ((0.3945209833890992 -0.5870769158876072, 0.3961365391793388 -0.5917494801343751, 0.3978335703133049 -0.5977596480577954, 0.4020500821434531 -0.6168388095636136, 0.2962900663630536 -0.6402118680472754, 0.2927485111798246 -0.6241867966032763, 0.2875074185540573 -0.6090283340078572, 0.3668101444176528 -0.5816091330756632, 0.3945209833890992 -0.5870769158876072))
2	131550000	135540000	2:131550000-135530000	392	0.353387	-0.647605	-0.671064	0.422732	1	0.0704593	POLYGON ((0.4020500821434531 -0.6168388095636136, 0.4062665939736014 -0.6359179710694318, 0.4070680882698009 -0.6404514224283252, 0.4074816497525474 -0.6450365659626413, 0.4075042897933002 -0.6496402668389849, 0.4067719246482332 -0.669109061216177, 0.298536517228436 -0.6650375281607327, 0.2990077983746642 -0.652509247983057, 0.2962900663630536 -0.6402118680472754, 0.4020500821434531 -0.6168388095…
2	131550000	135540000	2:131550000-135530000	393	0.351922	-0.686542	-3.33298	0.415292	2	-0.104086	POLYGON ((0.4067719246482332 -0.669109061216177, 0.4061722169836052 -0.6850513617034576, 0.4061789945444312 -0.6851243892710588, 0.3810102563767606 -0.7032235439566363, 0.2997809774098366 -0.7107622912699211, 0.2979976123431707 -0.6915467037883242, 0.2978041520833691 -0.6845063225379246, 0.298536517228436 -0.6650375281607327, 0.4067719246482332 -0.669109061216177))
2	131550000	135540000	2:131550000-135530000	394	0.355489	-0.724973	-3.33298	0.321054	3	0.258781	POLYGON ((0.3537669905470519 -0.7817019379714204, 0.3377283847426152 -0.7761342399195736, 0.3329385537375695 -0.7742111178454061, 0.3283535571271 -0.771840741155715, 0.3240150429672701 -0.7690446412909028, 0.3199624203779356 -0.7658482167700571, 0.3162325015679471 -0.7622805024821774, 0.3128591674495295 -0.7583739059462439, 0.3098730598792466 -0.7541639129358284, 0.3073013033210981 -0.74968876514…
2	131550000	135540000	2:131550000-135530000	395	0.387566	-0.736109	-3.33298	0.355273	2	-0.105732	POLYGON ((0.4061789945444312 -0.6851243892710588, 0.4061949924919822 -0.6852967656209376, 0.4101333430267048 -0.6868788308550632, 0.4137797653024092 -0.688766444578268, 0.4137105059376804 -0.6883495498740342, 0.4242030133578465 -0.701620655809974, 0.4252813464188594 -0.7058293863355627, 0.4219898063025131 -0.7251801573476355, 0.3661301520934015 -0.7892655955430185, 0.3598920845478503 -0.783828224…
2	131550000	135540000	2:131550000-135530000	396	0.415863	-0.760774	-3.33298	0.339033	3	0.247155	POLYGON ((0.4533497539754044 -0.8041579535968677, 0.4358490408974218 -0.8111070136166217, 0.4307483715749477 -0.8128439362680933, 0.4255003464784813 -0.8140653945855486, 0.4201569180375261 -0.8147592968342945, 0.4147709831198154 -0.814918773781239, 0.4093958593827499 -0.8145422466963471, 0.4040847574592611 -0.8136334429811605, 0.3988902542031553 -0.8122013592696657, 0.3938637722085053 -0.81026017…
2	131550000	135540000	2:131550000-135530000	397	0.450865	-0.746876	-3.33298	0.245075	2	-0.263673	POLYGON ((0.5067628926171758 -0.7608750113240346, 0.495739979306843 -0.7771917307785602, 0.4924968442692131 -0.7815112032271936, 0.4888395568241029 -0.7854861265787371, 0.4848044991362378 -0.7890769588725662, 0.4804318113738926 -0.7922479790301562, 0.4757649924003229 -0.7949676422031864, 0.4708504670533871 -0.7972088935771137, 0.4533497539754044 -0.8041579535968677, 0.4219898063025131 -0.72518015…
2	131550000	135540000	2:131550000-135530000	398	0.47291	-0.714242	-0.604047	0.379692	4	-0.34143	POLYGON ((0.5229853683773833 -0.6852097897433449, 0.52633409630553 -0.7053668752816075, 0.5269345117345243 -0.7104661604901847, 0.5270493105304077 -0.7155993884767691, 0.5266774607809698 -0.7207204172884076, 0.5258223049977233 -0.7257832146290256, 0.5244915300704815 -0.7307422716380561, 0.5226970981708534 -0.7355530119639712, 0.5204551392257593 -0.7401721924556062, 0.5177858059275086 -0.744558291…
2	131550000	135540000	2:131550000-135530000	399	0.466213	-0.673928	-0.38829	0.280314	1	0.393987	POLYGON ((0.4137105059376804 -0.6883495498740342, 0.412789123445611 -0.6828034481588136, 0.4121764348644623 -0.6775242667828543, 0.4120841468080492 -0.6722104521255304, 0.4125131480608049 -0.6669131791268188, 0.4134593071061493 -0.6616834634214809, 0.4149135119152525 -0.6565716700306125, 0.4168617577008538 -0.6516270283189581, 0.4192852817910184 -0.6468971578892172, 0.4221607443239248 -0.64242760…

## Sheet: ED_Fig4a_Bmp2_13.5_Female
Chr	Start	End	Region	LDBindex	LDBx	LDBy	Signal	LMIpval	LMIq	LMItype	Geometry
2	131550000	135540000	2:131550000-135530000	1	0.72027	0.383281	-3.45161	0.290794	3	0.185895	POLYGON ((0.7665597388742372 0.3242127670796204, 0.7430885524853644 0.3162257124844711, 0.7364060763046917 0.3143120013823756, 0.7295682015836912 0.3130625025278572, 0.7226407807938886 0.3124892492779303, 0.7156905287844032 0.3125977623747639, 0.7087843802814805 0.3133869967779161, 0.7019888452704883 0.3148493517286452, 0.6953693684684001 0.3169707439493711, 0.688989699055394 0.3197307432733373, …
2	131550000	135540000	2:131550000-135530000	2	0.767212	0.399255	-1.36756	0.151797	4	-0.388184	POLYGON ((0.8296458118648886 0.365931387616567, 0.8296277628203341 0.3659383675440171, 0.8275232020741726 0.3621104407941623, 0.823570197706718 0.3563492375201285, 0.8190688216497267 0.3510055196863165, 0.8140628731512926 0.3461312826870643, 0.808601061045659 0.3417739537785919, 0.8027365298069662 0.3379759306027475, 0.7965263424433755 0.3347741686498608, 0.7900309252631097 0.3321998216747696, 0.…
2	131550000	135540000	2:131550000-135530000	3	0.747234	0.433083	-3.45161	0.122878	3	0.273883	POLYGON ((0.7944697778158085 0.4381670040384408, 0.7389417661333891 0.4053724208870365, 0.7181647617247732 0.4166215376008963, 0.738168399932143 0.4623494663161572, 0.7784894687643165 0.4732753008006022, 0.7944697778158085 0.4381670040384408))
2	131550000	135540000	2:131550000-135530000	4	0.710523	0.449142	-3.45161	0.099158	3	0.260738	POLYGON ((0.738168399932143 0.4623494663161572, 0.7181647617247732 0.4166215376008963, 0.6541441985269703 0.4071468428707659, 0.6578089153320351 0.4795603984334275, 0.6922138349858741 0.4844425930149366, 0.738168399932143 0.4623494663161572))
2	131550000	135540000	2:131550000-135530000	5	0.731218	0.492189	-3.45161	0.0801184	3	0.271732	POLYGON ((0.738168399932143 0.4623494663161572, 0.6922138349858741 0.4844425930149366, 0.7471072857873622 0.5393087684590224, 0.7756452116142821 0.5101878346178271, 0.781588890799276 0.4872624871833641, 0.7784894687643165 0.4732753008006022, 0.738168399932143 0.4623494663161572))
2	131550000	135540000	2:131550000-135530000	6	0.699979	0.523443	-3.45161	0.0412592	3	0.345668	POLYGON ((0.6922138349858741 0.4844425930149366, 0.6578089153320351 0.4795603984334275, 0.6486522411329707 0.4925571887065595, 0.6358767083860266 0.5426295605400682, 0.6392437048747871 0.5481920569749268, 0.7445708332974283 0.5470961895086477, 0.7471072857873622 0.5393087684590224, 0.6922138349858741 0.4844425930149366))
2	131550000	135540000	2:131550000-135530000	7	0.700481	0.571672	-3.45161	0.0778384	3	0.274144	POLYGON ((0.7445708332974283 0.5470961895086477, 0.6392437048747871 0.5481920569749268, 0.6422147636771587 0.5657349089699959, 0.6691460099366929 0.6079573987547222, 0.6981931674638753 0.6139024991853026, 0.746733998596997 0.5587692016607407, 0.7445708332974283 0.5470961895086477))
2	131550000	135540000	2:131550000-135530000	8	0.739794	0.606284	-3.45161	0.0773985	3	0.274144	POLYGON ((0.7663346849138266 0.6475377101182102, 0.7592697442100581 0.57195617803524, 0.746733998596997 0.5587692016607407, 0.6981931674638753 0.6139024991853026, 0.7290623336804765 0.6504664962219545, 0.7663346849138266 0.6475377101182102))
2	131550000	135540000	2:131550000-135530000	9	0.78477	0.60208	-1.4067	0.0306594	4	-0.404083	POLYGON ((0.8235923864135648 0.6109244021299769, 0.8191609634225283 0.5841859812994337, 0.7592697442100581 0.57195617803524, 0.7663346849138266 0.6475377101182102, 0.7852110091298066 0.6555201011980278, 0.8156488367379647 0.6312343595473644, 0.8235923864135648 0.6109244021299769))
2	131550000	135540000	2:131550000-135530000	10	0.794539	0.554242	-3.45161	0.0557989	3	0.286783	POLYGON ((0.8191609634225283 0.5841859812994337, 0.8215634957577361 0.579960046104437, 0.8187050580926121 0.5425189282985977, 0.7756452116142821 0.5101878346178271, 0.7471072857873622 0.5393087684590224, 0.7445708332974283 0.5470961895086477, 0.746733998596997 0.5587692016607407, 0.7592697442100581 0.57195617803524, 0.8191609634225283 0.5841859812994337))
2	131550000	135540000	2:131550000-135530000	11	0.823221	0.516042	-0.547281	0.151357	4	-0.41806	POLYGON ((0.781588890799276 0.4872624871833641, 0.7756452116142821 0.5101878346178271, 0.8187050580926121 0.5425189282985977, 0.8509031751188753 0.5227206582323763, 0.8504205319319955 0.4964785910393807, 0.781588890799276 0.4872624871833641))
2	131550000	135540000	2:131550000-135530000	12	0.829326	0.470449	-3.45161	0.47587	3	0.0196074	POLYGON ((0.8608839005727186 0.4849787556781888, 0.8599242722959468 0.463316088311495, 0.8054643862582617 0.428574705284924, 0.7944697778158085 0.4381670040384408, 0.7784894687643165 0.4732753008006022, 0.781588890799276 0.4872624871833641, 0.8504205319319955 0.4964785910393807, 0.8608839005727186 0.4849787556781888))
2	131550000	135540000	2:131550000-135530000	13	0.853495	0.432562	-3.45161	0.0869383	2	-0.444906	POLYGON ((0.9206804348717069 0.3984375458313306, 0.9019110507891659 0.3808607676366849, 0.8966464923784753 0.3763918921385837, 0.8909717909452987 0.3724568969516227, 0.8849408828643672 0.3690931830523057, 0.8786110901502489 0.3663327215558531, 0.8720425756283924 0.3642017498401176, 0.8652977711050963 0.3627205221669937, 0.8584407839714788 0.3619031171715922, 0.8515367878815057 0.3617573040489374,…
2	131550000	135540000	2:131550000-135530000	14	0.891034	0.467716	-1.04259	0.47503	4	-0.0156205	POLYGON ((0.9530826932704266 0.5097523069442379, 0.9594391063587884 0.4860958837556084, 0.9609121183832061 0.4792975609063926, 0.9617111994234626 0.4723875372105322, 0.9618286428740144 0.4654324552539935, 0.9612633160708369 0.4584993921797197, 0.9600206712152162 0.4516552127731694, 0.9581126927908904 0.4449659245959, 0.9555577819816706 0.4384960413865073, 0.9523805792042519 0.4323079608684944, 0.…
2	131550000	135540000	2:131550000-135530000	15	0.878321	0.515028	-0.759098	0.389292	4	-0.147185	POLYGON ((0.9252265320263091 0.5684532626973277, 0.9294488226182596 0.5640495053105009, 0.9341036451663165 0.5586794979216614, 0.9381969377406246 0.5528700824423549, 0.9416874957529799 0.5466797385849854, 0.9445401819629116 0.5401707806270818, 0.9467262801820648 0.5334087301328674, 0.9530826932704266 0.5097523069442379, 0.8608839005727186 0.4849787556781888, 0.8504205319319955 0.4964785910393807,…
2	131550000	135540000	2:131550000-135530000	16	0.844371	0.550438	-3.45161	0.471811	3	0.0217696	POLYGON ((0.8215634957577361 0.579960046104437, 0.8877395326293607 0.5580390902203651, 0.8509031751188753 0.5227206582323763, 0.8187050580926121 0.5425189282985977, 0.8215634957577361 0.579960046104437))
2	131550000	135540000	2:131550000-135530000	17	0.857485	0.590028	-3.45161	0.471811	3	0.0217696	POLYGON ((0.9286227917415687 0.6093044636569157, 0.9283086385614464 0.588936013625, 0.9278335756454443 0.581766481713896, 0.9266346076345595 0.5746819670299269, 0.9249858176953482 0.5687043225166365, 0.9252265320263091 0.5684532626973277, 0.8877395326293607 0.5580390902203651, 0.8215634957577361 0.579960046104437, 0.8191609634225283 0.5841859812994337, 0.8235923864135648 0.6109244021299769, 0.928…
2	131550000	135540000	2:131550000-135530000	18	0.858114	0.630765	-3.45161	0.207896	3	0.217161	POLYGON ((0.9093640580003668 0.6840836041723445, 0.9198109839185653 0.6655585338353289, 0.9231397043534247 0.6588498632454954, 0.9257414973401948 0.6518272345303815, 0.9275872774043887 0.6445691537392237, 0.9286564105488984 0.637156759042794, 0.928936944921691 0.6296729136888313, 0.9286227917415687 0.6093044636569157, 0.8235923864135648 0.6109244021299769, 0.8156488367379647 0.6312343595473644, 0…
2	131550000	135540000	2:131550000-135530000	19	0.83722	0.667815	-3.45161	0.0160797	3	0.452756	POLYGON ((0.9082138591971609 0.6903148595473592, 0.9081843242899345 0.68617557363167, 0.9093640580003668 0.6840836041723445, 0.8156488367379647 0.6312343595473644, 0.7852110091298066 0.6555201011980278, 0.7948781626527114 0.6911235399214777, 0.9082138591971609 0.6903148595473592))
2	131550000	135540000	2:131550000-135530000	20	0.837548	0.713825	-3.45161	0.0622788	3	0.399498	POLYGON ((0.878766532491476 0.775653699042573, 0.892816026994925 0.7581262135774642, 0.8968678950265199 0.752532902041705, 0.9003557520745666 0.7465715580913941, 0.9032464357167223 0.7402988619754889, 0.9055124614344184 0.7337744542684048, 0.9071322839346988 0.7270603688095278, 0.9080905020021079 0.7202204428876476, 0.9083780049329071 0.7133197102782576, 0.9082138591971609 0.6903148595473592, 0.7…
2	131550000	135540000	2:131550000-135530000	21	0.809449	0.74888	-3.45161	0.0835383	3	0.577024	POLYGON ((0.7688284176138178 0.81115028886401, 0.7906082560835951 0.8171600954173657, 0.7973115459974451 0.8186641553203741, 0.8041290137236702 0.8195117552630606, 0.810996527237227 0.8196949218595679, 0.817849483731572 0.819211932058871, 0.8246234173382677 0.8180673293535446, 0.8312546055584114 0.8162718810390585, 0.8376806687011735 0.8138424769256606, 0.8438411566905218 0.8108019704556696, 0.84…
2	131550000	135540000	2:131550000-135530000	22	0.765889	0.73686	-3.45161	0.0616788	3	0.400925	POLYGON ((0.7001690206185709 0.7633496075707566, 0.7009366931123552 0.765114401802435, 0.7040482961157695 0.7713976447004802, 0.7077658587951967 0.7773424695331581, 0.7120529540262914 0.7828906249965729, 0.7168675740301593 0.7879877466142164, 0.7221625419932052 0.7925838894358672, 0.7278859743365824 0.796634017431064, 0.7339817891056257 0.8000984447817538, 0.7403902554977295 0.8029432247500413, 0…
2	131550000	135540000	2:131550000-135530000	23	0.746563	0.692431	-3.45161	0.0345793	3	0.370743	POLYGON ((0.7948781626527114 0.6911235399214777, 0.7852110091298066 0.6555201011980278, 0.7663346849138266 0.6475377101182102, 0.7290623336804765 0.6504664962219545, 0.7254539069536144 0.6563130325548087, 0.7258060329548468 0.7278781599476625, 0.7931209302079889 0.6985966753895378, 0.7948781626527114 0.6911235399214777))
2	131550000	135540000	2:131550000-135530000	24	0.704701	0.692637	-3.45161	0.466771	3	0.0244115	POLYGON ((0.6536459170419874 0.7417319974121678, 0.6537162956096676 0.7417193028389204, 0.6547916733380686 0.7428976827638586, 0.6599681427639289 0.7475555875691329, 0.6655769707216603 0.7516826884683638, 0.6715639464607417 0.7552390959803784, 0.6778712043360485 0.75819043652092, 0.6844377830940482 0.7605081846320939, 0.6912002150788401 0.7621699386881823, 0.698093139663212 0.7631596374130609, 0.…
2	131550000	135540000	2:131550000-135530000	25	0.683706	0.653636	-3.45161	0.050519	3	0.35199	POLYGON ((0.6739216392323011 0.6840549943788904, 0.7254539069536144 0.6563130325548087, 0.7290623336804765 0.6504664962219545, 0.6981931674638753 0.6139024991853026, 0.6691460099366929 0.6079573987547222, 0.6529708889097934 0.6380956325509499, 0.6739216392323011 0.6840549943788904))
2	131550000	135540000	2:131550000-135530000	26	0.644543	0.671489	-1.42314	0.379672	4	-0.0843147	POLYGON ((0.6217534085816393 0.7405610948479475, 0.6208149788119857 0.7381525682492646, 0.6256357613558011 0.7397504054745638, 0.6325242093539954 0.7412933328267661, 0.6395320265047398 0.7421429441612811, 0.6465896095902519 0.7422908009470408, 0.6536268611062808 0.7417354346371583, 0.6536459170419874 0.7417319974121678, 0.6739216392323011 0.6840549943788904, 0.6529708889097934 0.6380956325509499,…
2	131550000	135540000	2:131550000-135530000	27	0.623032	0.621073	-3.45161	0.271255	3	0.145243	POLYGON ((0.5592751442560537 0.6598927420016188, 0.5603738564947638 0.6599502050259357, 0.5640080790163349 0.6632268343336177, 0.5686376479385471 0.6740774858595733, 0.6529708889097934 0.6380956325509499, 0.6691460099366929 0.6079573987547222, 0.6422147636771587 0.5657349089699959, 0.5608090667481402 0.6560247737618452, 0.5592751442560537 0.6598927420016188))
2	131550000	135540000	2:131550000-135530000	28	0.589153	0.590527	-3.45161	0.113078	3	0.282039	POLYGON ((0.6392437048747871 0.5481920569749268, 0.6358767083860266 0.5426295605400682, 0.5974275543349885 0.5427708073829057, 0.5780704967924157 0.5511608695822615, 0.5654299261894591 0.5676723961783658, 0.5608090667481402 0.6560247737618452, 0.6422147636771587 0.5657349089699959, 0.6392437048747871 0.5481920569749268))
2	131550000	135540000	2:131550000-135530000	29	0.539453	0.587927	-3.45161	0.435311	2	-0.0292935	POLYGON ((0.521606695865253 0.6593269661173187, 0.5173401838889791 0.6551502977518219, 0.522163703805998 0.6566168273250531, 0.5289087146507423 0.6579700350594395, 0.5357531858151358 0.6586625355633446, 0.5592751442560537 0.6598927420016188, 0.5608090667481402 0.6560247737618452, 0.5654299261894591 0.5676723961783658, 0.4850947196534647 0.5725886698252728, 0.4812628253554603 0.5915637845654471, 0…
2	131550000	135540000	2:131550000-135530000	30	0.537177	0.550736	-0.625908	0.00809984	4	-1.14014	POLYGON ((0.4850947196534647 0.5725886698252728, 0.5654299261894591 0.5676723961783658, 0.5780704967924157 0.5511608695822615, 0.4952937316315048 0.5038975406940273, 0.4819618159093801 0.5498451233137078, 0.4850947196534647 0.5725886698252728))
2	131550000	135540000	2:131550000-135530000	31	0.556919	0.516159	-3.45161	0.0419192	3	0.405308	POLYGON ((0.5003248668835926 0.4736807592938767, 0.5002004297698079 0.4726817235691645, 0.4946854150481571 0.4886950480061759, 0.4952937316315048 0.5038975406940273, 0.5780704967924157 0.5511608695822615, 0.5974275543349885 0.5427708073829057, 0.5471885861646786 0.4667947867427497, 0.5124809727103424 0.4610031749776475, 0.507542310848798 0.4653747840950378, 0.5030142229559554 0.4702093204137299, …
2	131550000	135540000	2:131550000-135530000	32	0.588802	0.495077	-3.45161	0.0473791	3	0.343901	POLYGON ((0.6358767083860266 0.5426295605400682, 0.6486522411329707 0.4925571887065595, 0.5615635731013923 0.4635156238632704, 0.5471885861646786 0.4667947867427497, 0.5974275543349885 0.5427708073829057, 0.6358767083860266 0.5426295605400682))
2	131550000	135540000	2:131550000-135530000	33	0.602293	0.45462	-3.45161	0.0133997	3	0.468993	POLYGON ((0.652836729060819 0.4049845969885899, 0.638640078102805 0.3900833976739058, 0.5615635731013923 0.4635156238632704, 0.6486522411329707 0.4925571887065595, 0.6578089153320351 0.4795603984334275, 0.6541441985269703 0.4071468428707659, 0.652836729060819 0.4049845969885899))
2	131550000	135540000	2:131550000-135530000	34	0.57242	0.423264	-3.45161	0.437151	3	0.0469343	POLYGON ((0.638640078102805 0.3900833976739058, 0.6359691266737258 0.3872798928386981, 0.6347679742417319 0.3829275058458915, 0.521969626222522 0.4140570929602957, 0.5066285098308126 0.449415307728827, 0.5091424062593343 0.4550926155991413, 0.5124864820805982 0.460998298188364, 0.5124809727103424 0.4610031749776475, 0.5471885861646786 0.4667947867427497, 0.5615635731013923 0.4635156238632704, 0.6…
2	131550000	135540000	2:131550000-135530000	35	0.560557	0.380278	-1.67389	0.0614588	4	-0.345935	POLYGON ((0.6347679742417319 0.3829275058458915, 0.6288363461885448 0.3614341965062916, 0.6266939852663092 0.3549193317903788, 0.6239316233729657 0.3486421883829066, 0.6205751562787899 0.3426616113845323, 0.6166560491951349 0.3370336657331767, 0.6122110418037087 0.3318111106230861, 0.6072818038403114 0.3270429049136005, 0.601914544461767 0.3227737481641716, 0.5961595790580357 0.3190436615982023, …
2	131550000	135540000	2:131550000-135530000	36	0.522425	0.358107	-1.07666	0.189716	4	-0.460783	POLYGON ((0.5770933408847905 0.3079582035151208, 0.5580271027115452 0.2968727454320393, 0.5518867087198097 0.293693037218668, 0.5454655307628411 0.2911272125284638, 0.5388247647924218 0.2891997245201891, 0.5320276995068014 0.2879289427926942, 0.525139113188449 0.2873269783165585, 0.5182246563455755 0.2873995680125314, 0.5113502260410555 0.2881460200767779, 0.5045813378716013 0.2895592205739987, 0…
2	131550000	135540000	2:131550000-135530000	37	0.480781	0.383504	-3.45161	0.335553	3	0.111298	POLYGON ((0.4968273830359654 0.4524941371801062, 0.4968139359982574 0.4524468432374943, 0.4979494081921873 0.4522233320921548, 0.504786612085108 0.450143520773049, 0.5066126825532586 0.4493795638825795, 0.5066285098308126 0.449415307728827, 0.521969626222522 0.4140570929602957, 0.521542747352971 0.4035014674023621, 0.4822061892645032 0.3390008095685683, 0.4449653632359812 0.3980498266424337, 0.46…
2	131550000	135540000	2:131550000-135530000	38	0.44266	0.359462	-3.45161	0.347013	2	-0.121564	POLYGON ((0.4815446162032302 0.3000729593573092, 0.4814069331479923 0.3001569271443373, 0.4804452552782477 0.2995504195339255, 0.4742667869869097 0.296073287126798, 0.4677716703565928 0.2932312139112832, 0.461024976359565 0.291052673043125, 0.454094296382243 0.2895594901153785, 0.4470490650645682 0.2887666244998934, 0.439959864672847 0.2886820194776629, 0.4328977179751603 0.2893065226594951, 0.40…
2	131550000	135540000	2:131550000-135530000	39	0.39608	0.365944	-0.706849	1.99996e-05	4	-1.09095	POLYGON ((0.4096073540525561 0.292547496710291, 0.3863169901299525 0.2957884707610867, 0.3795513754913929 0.2970678340998868, 0.3729419464693917 0.2989980568832145, 0.3665511600094622 0.3015608991362086, 0.360439406956319 0.3047321428366432, 0.3546644413801194 0.3084818207673273, 0.3492808348193635 0.3127744996965201, 0.3443394605976794 0.3175696152103974, 0.3398870130875313 0.3228218550335134, 0…
2	131550000	135540000	2:131550000-135530000	40	0.414458	0.421791	-3.45161	0.187016	3	0.299028	POLYGON ((0.3379869132177287 0.4160095640510808, 0.3467232822614876 0.4425562902669757, 0.3534668897242336 0.4662739142720885, 0.4658961045300847 0.4343070320990695, 0.4449653632359812 0.3980498266424337, 0.4228991687382105 0.3880654479091546, 0.3379869132177287 0.4160095640510808))
2	131550000	135540000	2:131550000-135530000	41	0.428738	0.472014	-3.45161	0.306534	3	0.153882	POLYGON ((0.3534668897242336 0.4662739142720885, 0.3591210176460232 0.4861597811269795, 0.3615030612529075 0.5052838719124504, 0.4946854150481571 0.4886950480061759, 0.5002004297698079 0.4726817235691645, 0.499026732452173 0.4632587667466099, 0.4981513575558713 0.457909086491274, 0.4968694295617957 0.4526420170346017, 0.4968273830359654 0.4524941371801062, 0.4658961045300847 0.4343070320990695, 0…
2	131550000	135540000	2:131550000-135530000	42	0.434845	0.521044	-3.45161	0.0956381	3	0.362379	POLYGON ((0.3615030612529075 0.5052838719124504, 0.3634418387439954 0.520849227914009, 0.3617049519995354 0.5341991622636607, 0.4819618159093801 0.5498451233137078, 0.4952937316315048 0.5038975406940273, 0.4946854150481571 0.4886950480061759, 0.3615030612529075 0.5052838719124504))
2	131550000	135540000	2:131550000-135530000	43	0.429044	0.565631	-3.45161	0.234615	3	0.197776	POLYGON ((0.3617049519995354 0.5341991622636607, 0.3588044594924222 0.5564927197884246, 0.3582374626746951 0.5637498883407952, 0.3575857570545272 0.5882776728279698, 0.4812628253554603 0.5915637845654471, 0.4850947196534647 0.5725886698252728, 0.4819618159093801 0.5498451233137078, 0.3617049519995354 0.5341991622636607))
2	131550000	135540000	2:131550000-135530000	44	0.427741	0.614687	-3.45161	0.333133	2	-0.11579	POLYGON ((0.3575857570545272 0.5882776728279698, 0.3569340514343592 0.6128054573151447, 0.3569114925379083 0.6152735676882453, 0.3571116198632482 0.6394311406312094, 0.4885041354268568 0.6383426524469239, 0.4921473747743284 0.6370033506166968, 0.4812628253554603 0.5915637845654471, 0.3575857570545272 0.5882776728279698))
2	131550000	135540000	2:131550000-135530000	45	0.428141	0.663002	-3.45161	0.108278	2	-0.361686	POLYGON ((0.3571116198632482 0.6394311406312094, 0.3573117471885882 0.6635887135741735, 0.357750314998397 0.6708936427063632, 0.3589402534562472 0.6781143336578335, 0.360868860825995 0.6851737107524126, 0.3635155506127894 0.6919964202231869, 0.3668520713090802 0.6985096345596983, 0.3708428079591166 0.7046438298891748, 0.3754451623229529 0.7103335280938067, 0.3901398650105394 0.7266936559052658, 0…
2	131550000	135540000	2:131550000-135530000	46	0.45753	0.695722	-0.660617	0.133917	1	0.512047	POLYGON ((0.3901398650105394 0.7266936559052658, 0.4048345676981259 0.7430537837167249, 0.4079806277149786 0.7463379102705798, 0.4085915862586317 0.7469360033349135, 0.429248184779825 0.7534238250060293, 0.5214308160083664 0.6592582687004273, 0.4921473747743284 0.6370033506166968, 0.4885041354268568 0.6383426524469239, 0.3901398650105394 0.7266936559052658))
2	131550000	135540000	2:131550000-135530000	47	0.486335	0.72392	-1.08782	0.0384192	1	0.619285	POLYGON ((0.5422357707950239 0.6804798367745734, 0.5422095033595032 0.6804816050494605, 0.5415552637224142 0.679559616835692, 0.5358847591071226 0.6733043639060763, 0.521606695865253 0.6593269661173187, 0.5214308160083664 0.6592582687004273, 0.429248184779825 0.7534238250060293, 0.4412670254856694 0.7620650536869401, 0.4603672585783107 0.767728494515689, 0.5212994097557976 0.7297386567753961, 0.5…
2	131550000	135540000	2:131550000-135530000	48	0.511134	0.763695	-3.45161	9.9998e-05	2	-0.89569	POLYGON ((0.5191619406532459 0.8155624378779908, 0.5373905932390115 0.778212138296527, 0.5212994097557976 0.7297386567753961, 0.4603672585783107 0.767728494515689, 0.5080444736041158 0.8136342137031238, 0.5191619406532459 0.8155624378779908))
2	131550000	135540000	2:131550000-135530000	49	0.549754	0.750875	-0.490024	0.050279	1	0.811943	POLYGON ((0.6233706710928956 0.7447118793833224, 0.6217534085816393 0.7405610948479475, 0.5713008852559639 0.6803195054833789, 0.5728796707148079 0.6840198177880453, 0.5698313415258847 0.6829481714810766, 0.5628579341382522 0.6812657494749831, 0.5557501198168746 0.6802972816266296, 0.5485808008258591 0.6800527011581949, 0.5422357707950239 0.6804798367745734, 0.5212994097557976 0.7297386567753961,…
2	131550000	135540000	2:131550000-135530000	50	0.56499	0.789979	-0.483624	0.0361593	1	0.932778	POLYGON ((0.6381692842579462 0.7804983096556842, 0.6304554321463579 0.7628952703992273, 0.6233706710928956 0.7447118793833224, 0.5373905932390115 0.778212138296527, 0.5191619406532459 0.8155624378779908, 0.5311425197779303 0.8273986557352851, 0.6381692842579462 0.7804983096556842))
2	131550000	135540000	2:131550000-135530000	51	0.581597	0.827876	-0.988437	0.0569389	1	0.740909	POLYGON ((0.6447942147261776 0.8661705844953, 0.6501224663440205 0.8458027075178156, 0.6515201917416952 0.839183016125741, 0.6522799687429497 0.8324601678214896, 0.6523948655078985 0.8256954986391115, 0.6518638337737268 0.818950726166232, 0.6506917184185361 0.8122873864624695, 0.6488892132590069 0.8057662726340287, 0.6464727634851595 0.7994468801866423, 0.6381692842579462 0.7804983096556842, 0.53…
2	131550000	135540000	2:131550000-135530000	52	0.57094	0.868612	-1.31887	0.0286994	1	0.857035	POLYGON ((0.5713747993620858 0.9425229902488352, 0.5915747031363917 0.9363716012394709, 0.5983625471262755 0.9339201973643571, 0.6048657124793935 0.9307908128593896, 0.6110166881496333 0.9270159346767136, 0.6167516192633201 0.92263475080575, 0.6220109700132208 0.9176927434525135, 0.6267401417151997 0.9122412168770371, 0.6308900396113182 0.9063367647905419, 0.6344175825352496 0.9000406828414449, 0…
2	131550000	135540000	2:131550000-135530000	53	0.53054	0.880915	-3.45161	0.000259995	2	-0.87688	POLYGON ((0.5576119720102252 0.9467141243183798, 0.5713747993620858 0.9425229902488352, 0.5397557326912735 0.8386924402362331, 0.5329920368600967 0.8321815255567265, 0.502509885561442 0.8899237053151585, 0.5576119720102252 0.9467141243183798))
2	131550000	135540000	2:131550000-135530000	54	0.494136	0.861697	-1.54188	1.99996e-05	1	0.917038	POLYGON ((0.4766344725833044 0.8892410619397016, 0.502509885561442 0.8899237053151585, 0.5329920368600967 0.8321815255567265, 0.5311425197779303 0.8273986557352851, 0.5191619406532459 0.8155624378779908, 0.5080444736041158 0.8136342137031238, 0.4696496660448802 0.8456061375061827, 0.471157293374299 0.8843370497846351, 0.4766344725833044 0.8892410619397016))
2	131550000	135540000	2:131550000-135530000	55	0.492659	0.91767	-0.385975	0.000819984	1	1.90175	POLYGON ((0.4807023210619999 0.9874283257163032, 0.4859980961531694 0.9881874628843796, 0.4928156023597068 0.9885012164000812, 0.4996316586625075 0.988157401592601, 0.5063829878837669 0.9871592102828013, 0.5130069137425726 0.9855159092264404, 0.5194419427130922 0.983242754085812, 0.5256283349025994 0.9803608478030895, 0.5315086586495656 0.9768969446901753, 0.537028323693178 0.9728832020537928, 0.…
2	131550000	135540000	2:131550000-135530000	56	0.451185	0.909669	-0.754398	3.99992e-05	1	1.60106	POLYGON ((0.463061724921141 0.959597872173704, 0.4766344725833044 0.8892410619397016, 0.471157293374299 0.8843370497846351, 0.4135594824821305 0.8902026449332237, 0.4213781766127599 0.9321843467794162, 0.463061724921141 0.959597872173704))
2	131550000	135540000	2:131550000-135530000	57	0.446488	0.863552	-0.765704	5.99988e-05	1	1.54171	POLYGON ((0.4135594824821305 0.8902026449332237, 0.471157293374299 0.8843370497846351, 0.4696496660448802 0.8456061375061827, 0.438014101225585 0.8373208987836764, 0.4056211997055635 0.8561016264826063, 0.4029584738530095 0.8607408629895021, 0.4052088899229605 0.8814704282528834, 0.4135594824821305 0.8902026449332237))
2	131550000	135540000	2:131550000-135530000	58	0.458258	0.818611	-0.595054	1.99996e-05	1	1.73289	POLYGON ((0.4696496660448802 0.8456061375061827, 0.5080444736041158 0.8136342137031238, 0.4603672585783107 0.767728494515689, 0.4412670254856694 0.7620650536869401, 0.438014101225585 0.8373208987836764, 0.4696496660448802 0.8456061375061827))
2	131550000	135540000	2:131550000-135530000	59	0.41946	0.816934	-0.995897	1.99996e-05	1	1.39592	POLYGON ((0.4085915862586317 0.7469360033349135, 0.4086785719058265 0.7470211572505502, 0.4064526556186689 0.7473070007343816, 0.3860099005008016 0.751126070650302, 0.4056211997055635 0.8561016264826063, 0.438014101225585 0.8373208987836764, 0.4412670254856694 0.7620650536869401, 0.429248184779825 0.7534238250060293, 0.4085915862586317 0.7469360033349135))
2	131550000	135540000	2:131550000-135530000	60	0.378575	0.824572	-0.249154	3.99992e-05	1	1.87188	POLYGON ((0.3860099005008016 0.751126070650302, 0.3655671453829345 0.7549451405662223, 0.3590664850544407 0.7564799591353587, 0.3527392993319575 0.7586202800411633, 0.3492127061625981 0.7601973795759878, 0.3476857863694012 0.7577288598080341, 0.3458841489727161 0.7616530936559743, 0.3377644027225312 0.8370591181562642, 0.4029584738530095 0.8607408629895021, 0.4056211997055635 0.8561016264826063, …
2	131550000	135540000	2:131550000-135530000	61	0.361046	0.872827	-0.783537	1.99996e-05	1	1.67782	POLYGON ((0.3566245101782757 0.9056419511407396, 0.4052088899229605 0.8814704282528834, 0.4029584738530095 0.8607408629895021, 0.3377644027225312 0.8370591181562642, 0.3320273278310972 0.8431851410206403, 0.3259125605840069 0.8930164462219925, 0.3566245101782757 0.9056419511407396))
2	131550000	135540000	2:131550000-135530000	62	0.385465	0.921908	-0.0496218	1.99996e-05	1	2.33423	POLYGON ((0.3804125825000519 0.95598024838913, 0.4213781766127599 0.9321843467794162, 0.4135594824821305 0.8902026449332237, 0.4052088899229605 0.8814704282528834, 0.3566245101782757 0.9056419511407396, 0.365035985267173 0.9459832786777385, 0.3804125825000519 0.95598024838913))
2	131550000	135540000	2:131550000-135530000	63	0.412512	0.968472	-0.305623	0.000859983	1	1.75626	POLYGON ((0.4529767842975127 1.03018768771117, 0.4664154978408266 1.014423545812501, 0.470522468994346 1.00911583928954, 0.4741086804988245 1.0034432695337, 0.4771419388506524 0.9974567593348627, 0.4795950144194587 0.9912100497335249, 0.4806809450965598 0.9874252615208664, 0.4807023210619999 0.9874283257163032, 0.463061724921141 0.959597872173704, 0.4213781766127599 0.9321843467794162, 0.38041258…
2	131550000	135540000	2:131550000-135530000	64	0.385635	1	-0.530255	0.00223996	1	1.89444	POLYGON ((0.326147258808055 1.044002838040749, 0.343303586755932 1.05679092773303, 0.3492065746142619 1.060746399082821, 0.3554761651661106 1.064090536275997, 0.3620492630690346 1.066789684884945, 0.3688597185705629 1.068816681460253, 0.375838993220136 1.070151126895794, 0.3829168496202109 1.070779591719414, 0.3900220582750757 1.070695751243251, 0.3970831144238527 1.069900449213561, 0.40402895764…
2	131550000	135540000	2:131550000-135530000	65	0.351322	0.974424	-3.45161	7.99984e-05	2	-0.976749	POLYGON ((0.3019300181345035 1.025104774848524, 0.3019478661944902 1.025103587091964, 0.3035543961022485 1.026724717180363, 0.3089909308601779 1.031214748348467, 0.326147258808055 1.044002838040749, 0.381722251135392 0.9694441809612614, 0.3804125825000519 0.95598024838913, 0.365035985267173 0.9459832786777385, 0.3251426380171117 0.9597697713206894, 0.3019300181345035 1.025104774848524))
2	131550000	135540000	2:131550000-135530000	66	0.336688	0.932079	-0.812592	3.99992e-05	1	1.62806	POLYGON ((0.3251426380171117 0.9597697713206894, 0.365035985267173 0.9459832786777385, 0.3566245101782757 0.9056419511407396, 0.3259125605840069 0.8930164462219925, 0.3218378732464965 0.8954429054752964, 0.3074471582230917 0.9275057906657589, 0.3251426380171117 0.9597697713206894))
2	131550000	135540000	2:131550000-135530000	67	0.295586	0.954622	-0.631472	0.0117398	1	1.31715	POLYGON ((0.2212041132238723 0.9481457973096323, 0.2266994371802331 0.9711076829054586, 0.2286132937161867 0.9776824893348462, 0.2311530863015415 0.9840417644545045, 0.2342950776510411 0.9901260735183013, 0.2380099022387893 0.9958785516544084, 0.2422628407528921 1.001245435332987, 0.2470141445873926 1.006176564848259, 0.2522194073387484 1.010625853118699, 0.2578299798347883 1.01455171642386, 0.26…
2	131550000	135540000	2:131550000-135530000	68	0.284595	0.908698	-1.50458	0.00135997	1	0.87938	POLYGON ((0.2223813129987496 0.8679291883159108, 0.2163275988760126 0.8898121487273597, 0.2147717832160395 0.8967888627376833, 0.2139270576578805 0.9038868581928136, 0.2138020249827677 0.9110338482991318, 0.2143979585376958 0.9181570472959146, 0.2157087892675114 0.925183911713806, 0.2212041132238723 0.9481457973096323, 0.3074471582230917 0.9275057906657589, 0.3218378732464965 0.8954429054752964, …
2	131550000	135540000	2:131550000-135530000	69	0.296703	0.864932	-2.68092	1.99996e-05	2	-0.184031	POLYGON ((0.2268038997272961 0.8503123236461163, 0.2266240964145232 0.8525923786087908, 0.2223813129987496 0.8679291883159108, 0.3218378732464965 0.8954429054752964, 0.3259125605840069 0.8930164462219925, 0.3320273278310972 0.8431851410206403, 0.2443026566492195 0.8362672435363101, 0.2268038997272961 0.8503123236461163))
2	131550000	135540000	2:131550000-135530000	70	0.300548	0.81617	-0.249671	5.99988e-05	1	2.2835	POLYGON ((0.3377644027225312 0.8370591181562642, 0.3458841489727161 0.7616530936559743, 0.2531100441448318 0.8190391509996643, 0.2443026566492195 0.8362672435363101, 0.3320273278310972 0.8431851410206403, 0.3377644027225312 0.8370591181562642))
2	131550000	135540000	2:131550000-135530000	71	0.27686	0.777874	-0.0607234	0.000259995	1	2.42199	POLYGON ((0.3476857863694012 0.7577288598080341, 0.3370987335242572 0.7406131282882463, 0.3333205826283495 0.7351039394369946, 0.3290402333310257 0.7299751778044068, 0.3242957577581617 0.7252724618306847, 0.3191293562674098 0.721037620437272, 0.3135869820916063 0.7173083209740495, 0.3077179326017401 0.7141177341821715, 0.3015744108250475 0.7114942391525768, 0.2952110611183684 0.7094611709044572, …
2	131550000	135540000	2:131550000-135530000	72	0.227656	0.778906	-0.337289	0.00165997	1	1.99421	POLYGON ((0.1977386531915872 0.8473940757303976, 0.2214911004057119 0.8494691343030866, 0.2268563885288481 0.8496467221584809, 0.2268038997272961 0.8503123236461163, 0.2443026566492195 0.8362672435363101, 0.2531100441448318 0.8190391509996643, 0.2507727256862301 0.707574067820615, 0.2300022499719218 0.7080096052543692, 0.2207103674738777 0.7071978488799557, 0.2089578577136443 0.718971887218723, 0…
2	131550000	135540000	2:131550000-135530000	73	0.180151	0.774756	-1.70568	0.00375992	1	0.583379	POLYGON ((0.1209371897871965 0.8196423300845717, 0.1392681306913962 0.8325984913826695, 0.1455942828762203 0.8365863547715982, 0.1523056165620867 0.839885029661803, 0.159327324227625 0.8424577475503467, 0.1665811387845289 0.8442758317751178, 0.1739862059774626 0.8453190171577086, 0.1977386531915872 0.8473940757303976, 0.2089578577136443 0.718971887218723, 0.1849934483833755 0.7290127474594249, 0.…
2	131550000	135540000	2:131550000-135530000	74	0.143489	0.748844	-0.623687	0.0772585	1	0.683148	POLYGON ((0.1073958742920537 0.8100714374249751, 0.1209371897871965 0.8196423300845717, 0.1849934483833755 0.7290127474594249, 0.11086749683132 0.7205987582458159, 0.09588471069439827 0.7513602444692474, 0.1073958742920537 0.8100714374249751))
2	131550000	135540000	2:131550000-135530000	75	0.148989	0.700384	-0.61358	0.049559	1	0.731667	POLYGON ((0.2207103674738777 0.7071978488799557, 0.2194504937678625 0.7070877839375688, 0.2198150685225329 0.7013190755190337, 0.2195556962005022 0.6942562248856952, 0.2185937595166297 0.6872543814936656, 0.2169388356104681 0.6803832564085648, 0.2146074010729031 0.6737112592512411, 0.2116226679035379 0.667304817104622, 0.2080143524096613 0.6612277131589142, 0.2021303506529597 0.6523580325555695, …
2	131550000	135540000	2:131550000-135530000	76	0.123302	0.661662	-0.748476	0.271675	1	0.2249	POLYGON ((0.09642815940964784 0.6875554178806896, 0.1077858008954055 0.6998361470669943, 0.1657519835097648 0.6613823249300891, 0.1053561641782276 0.6402902437479002, 0.09642815940964784 0.6875554178806896))
2	131550000	135540000	2:131550000-135530000	77	0.078258	0.630103	-0.924983	0.447691	4	-0.0581164	POLYGON ((0.05529296563525381 0.6445462251820516, 0.104914626427515 0.639079248480656, 0.1082631745397949 0.5997325516349656, 0.09748058725196659 0.5802694872237096, 0.07699620117718446 0.575123696120919, 0.07232359436961888 0.5758069074186621, 0.01799471051688712 0.6072786871004368, 0.0143038929940608 0.6115757273998144, 0.05529296563525381 0.6445462251820516))
2	131550000	135540000	2:131550000-135530000	78	0.0461076	0.670073	-3.45161	0.468531	3	0.0199452	POLYGON ((-0.007385593732300787 0.6235652757491302, -0.007511783017156485 0.6237221548413918, 0.004472260540193833 0.6737127322509687, 0.04610678603061417 0.6971434587172819, 0.07333644563702491 0.6827021652077365, 0.05529296563525381 0.6445462251820516, 0.0143038929940608 0.6115757273998144, -0.007764630562769639 0.6226674194558514, -0.007537602537917222 0.6236144505640258, -0.007385593732300787…
2	131550000	135540000	2:131550000-135530000	79	0.022967	0.711192	-3.45161	0.395472	2	-0.0553372	POLYGON ((0.04516326921040734 0.7349755765746037, 0.04610678603061417 0.6971434587172819, 0.004472260540193833 0.6737127322509687, -0.008792556540272811 0.7084777026213411, 0.02510374129270779 0.7449984090241532, 0.04516326921040734 0.7349755765746037))
2	131550000	135540000	2:131550000-135530000	80	-0.00844992	0.740351	-1.02503	0.48177	4	-0.00162893	POLYGON ((0.02510374129270779 0.7449984090241532, -0.008792556540272811 0.7084777026213411, -0.02810897423329192 0.7182629008128723, -0.03026709224159492 0.7233010956643656, -0.01181342885460771 0.7653045968099124, 0.02014215086100937 0.7560375526001718, 0.02510374129270779 0.7449984090241532))
2	131550000	135540000	2:131550000-135530000	81	-0.0342879	0.689346	-3.45161	0.154497	2	-0.200074	POLYGON ((-0.007511783017156485 0.6237221548413918, -0.007564526897350383 0.6237877262728857, -0.007804208437077112 0.6237006975132606, -0.007537602537917222 0.6236144505640258, -0.007764630562769639 0.6226674194558514, -0.01361661085402185 0.6217940602490505, -0.06021555786505593 0.6295086529171051, -0.09639009226439035 0.6649309930657046, -0.02810897423329192 0.7182629008128723, -0.008792556540…
2	131550000	135540000	2:131550000-135530000	82	-0.0576615	0.719271	-3.45161	0.0350393	2	-0.429132	POLYGON ((-0.118040448289205 0.6887113977877065, -0.09946231498037145 0.7604866646244656, -0.09156655693063716 0.772126058234179, -0.03026709224159492 0.7233010956643656, -0.02810897423329192 0.7182629008128723, -0.09639009226439035 0.6649309930657046, -0.1078186128549057 0.6709738586399657, -0.118040448289205 0.6887113977877065))
2	131550000	135540000	2:131550000-135530000	83	-0.0324671	0.750903	-3.45161	0.253235	2	-0.163846	POLYGON ((-0.08406620648786182 0.7994153172255289, -0.08025979590215174 0.8031808764890984, -0.06183706747934898 0.8200229693162728, -0.01181342885460771 0.7653045968099124, -0.03026709224159492 0.7233010956643656, -0.09156655693063716 0.772126058234179, -0.08406620648786182 0.7994153172255289))
2	131550000	135540000	2:131550000-135530000	84	0.00437836	0.784587	-1.44879	0.416532	4	-0.0955279	POLYGON ((-0.06183706747934898 0.8200229693162728, -0.0434143390565462 0.8368650621434474, -0.03794486468906567 0.8413838533415351, -0.03205078095670911 0.8453328279811613, -0.02579122047821145 0.8486723678243839, -0.01922898253163379 0.851368968810985, -0.01242990301822278 0.8533955771892259, -0.00546219396123288 0.8547318609336387, 0.001604240833785754 0.8553644137268437, 0.008698507091569354 0…
2	131550000	135540000	2:131550000-135530000	85	0.0508547	0.767006	-3.45161	0.164277	2	-0.226482	POLYGON ((0.0526776309468373 0.8420465973392753, 0.07591581836558656 0.8332560615731024, 0.08238135416378703 0.8304347098766411, 0.08853418880330752 0.8269842310038392, 0.09431329453666604 0.8229388490100593, 0.09966135049859801 0.8183386885801416, 0.1045253112510433 0.8132293770461277, 0.1071289154470549 0.8098827530648087, 0.1073958742920537 0.8100714374249751, 0.09588471069439827 0.75136024446…
2	131550000	135540000	2:131550000-135530000	86	0.0685175	0.712328	-3.45161	0.0969581	2	-0.265979	POLYGON ((0.09588471069439827 0.7513602444692474, 0.11086749683132 0.7205987582458159, 0.1077858008954055 0.6998361470669943, 0.09642815940964784 0.6875554178806896, 0.07333644563702491 0.6827021652077365, 0.04610678603061417 0.6971434587172819, 0.04516326921040734 0.7349755765746037, 0.09588471069439827 0.7513602444692474))
2	131550000	135540000	2:131550000-135530000	87	0.0808515	0.653643	-3.45161	0.302374	2	-0.103258	POLYGON ((0.09642815940964784 0.6875554178806896, 0.1053561641782276 0.6402902437479002, 0.104914626427515 0.639079248480656, 0.05529296563525381 0.6445462251820516, 0.07333644563702491 0.6827021652077365, 0.09642815940964784 0.6875554178806896))
2	131550000	135540000	2:131550000-135530000	88	0.132705	0.634737	-1.10164	0.297314	1	0.161469	POLYGON ((0.2021303506529597 0.6523580325555695, 0.2019517751104066 0.6520888436444323, 0.2054490943626965 0.6430837997365998, 0.1939189324480681 0.6329989670204063, 0.1082631745397949 0.5997325516349656, 0.104914626427515 0.639079248480656, 0.1053561641782276 0.6402902437479002, 0.1657519835097648 0.6613823249300891, 0.2021303506529597 0.6523580325555695))
2	131550000	135540000	2:131550000-135530000	89	0.149924	0.5904	-3.45161	0.427771	2	-0.0343296	POLYGON ((0.1939189324480681 0.6329989670204063, 0.157235353115903 0.5577008134514637, 0.1250188112972409 0.5602775285142211, 0.09748058725196659 0.5802694872237096, 0.1082631745397949 0.5997325516349656, 0.1939189324480681 0.6329989670204063))
2	131550000	135540000	2:131550000-135530000	90	0.187492	0.572098	-3.45161	0.201336	2	-0.224498	POLYGON ((0.2054490943626965 0.6430837997365998, 0.2059011648820291 0.6419197896527732, 0.2185135610162319 0.6357753118372036, 0.2246077529882356 0.63242668831876, 0.2303442387226442 0.6284966518457952, 0.2356677330768308 0.6240230779813272, 0.2405269310954148 0.6190490806073736, 0.2448750024596353 0.6136225964167071, 0.2486700428126 0.6077959229249731, 0.2518754776107812 0.6016252144555575, 0.25…
2	131550000	135540000	2:131550000-135530000	91	0.193749	0.526153	-3.45161	0.418192	3	0.0695499	POLYGON ((0.2608040438061653 0.5586840858444971, 0.263932721181766 0.5357114801974918, 0.2645449342641762 0.5284012073484623, 0.2643977735373387 0.5210668200048589, 0.2634928174787615 0.5137869883778515, 0.2618397728411549 0.5066397975022968, 0.2594563705357216 0.4997019096799126, 0.2563681754466006 0.493047742182993, 0.2526083122164393 0.4867486690387903, 0.2482171099443745 0.4808722554563963, 0…
2	131550000	135540000	2:131550000-135530000	92	0.163739	0.490054	-3.45161	0.49785	3	0.00680467	POLYGON ((0.2332119424628521 0.4628225370312137, 0.2182067749813296 0.4447728186060311, 0.2134895104155899 0.439635558141885, 0.2082898815375481 0.4349871294191555, 0.2026583017346295 0.4308726016232813, 0.1966493724064875 0.4273318674636673, 0.1903213535730842 0.4243992563909617, 0.1837355990103456 0.4221032017533213, 0.1769559613900768 0.4204659651187757, 0.1700481731916469 0.4195034204365429, …
2	131550000	135540000	2:131550000-135530000	93	0.144819	0.526579	-0.791089	0.327393	4	-0.20976	POLYGON ((0.1694571642854841 0.5462434023765627, 0.1691941867550419 0.5160420456993754, 0.1238745922542849 0.4925677024898897, 0.1250188112972409 0.5602775285142211, 0.157235353115903 0.5577008134514637, 0.1694571642854841 0.5462434023765627))
2	131550000	135540000	2:131550000-135530000	94	0.104091	0.527267	-3.45161	0.457531	3	0.0308901	POLYGON ((0.1007296180270052 0.455470124612157, 0.0920291301136112 0.4543868281944141, 0.07699620117718446 0.575123696120919, 0.09748058725196659 0.5802694872237096, 0.1250188112972409 0.5602775285142211, 0.1238745922542849 0.4925677024898897, 0.1007296180270052 0.455470124612157))
2	131550000	135540000	2:131550000-135530000	95	0.0624639	0.522084	-3.45161	0.407432	2	-0.045146	POLYGON ((0.0920291301136112 0.4543868281944141, 0.07121556283809012 0.4517953341202353, 0.06430393681566951 0.4512764988584158, 0.0631992085429067 0.4513018736126775, 0.06478423267011099 0.4500254710828635, 0.05228726868043103 0.4529397158871217, 0.01214323494601591 0.4801092069038412, 0.07232359436961888 0.5758069074186621, 0.07699620117718446 0.575123696120919, 0.0920291301136112 0.45438682819…
2	131550000	135540000	2:131550000-135530000	96	0.0281753	0.543647	-3.45161	0.329933	3	0.0967923	POLYGON ((0.005892651037437142 0.4819118732082924, -0.003184011554768117 0.489184034661941, 0.01799471051688712 0.6072786871004368, 0.07232359436961888 0.5758069074186621, 0.01214323494601591 0.4801092069038412, 0.005892651037437142 0.4819118732082924))
2	131550000	135540000	2:131550000-135530000	97	-0.0136633	0.55115	-3.45161	0.48643	3	0.0121218	POLYGON ((-0.003184011554768117 0.489184034661941, -0.04948831665801463 0.5050697250097365, -0.05093205538185921 0.5064448481417748, -0.01361661085402185 0.6217940602490505, -0.007764630562769639 0.6226674194558514, 0.0143038929940608 0.6115757273998144, 0.01799471051688712 0.6072786871004368, -0.003184011554768117 0.489184034661941))
2	131550000	135540000	2:131550000-135530000	98	-0.0549551	0.564508	-0.623997	0.270935	1	0.244272	POLYGON ((-0.07143559671109598 0.5146106837649872, -0.08121979116857819 0.593666335485096, -0.06021555786505593 0.6295086529171051, -0.01361661085402185 0.6217940602490505, -0.05093205538185921 0.5064448481417748, -0.07143559671109598 0.5146106837649872))
2	131550000	135540000	2:131550000-135530000	99	-0.0995834	0.558985	-1.1931	0.342133	1	0.11407	POLYGON ((-0.09350662186807128 0.5132154048452525, -0.1433603521495865 0.5409926419814962, -0.1502315009864348 0.5535198261530847, -0.1416996355328412 0.5658834598381182, -0.08121979116857819 0.593666335485096, -0.07143559671109598 0.5146106837649872, -0.09350662186807128 0.5132154048452525))
2	131550000	135540000	2:131550000-135530000	100	-0.119495	0.60233	-0.437078	0.0185596	1	0.93447	POLYGON ((-0.1078186128549057 0.6709738586399657, -0.09639009226439035 0.6649309930657046, -0.06021555786505593 0.6295086529171051, -0.08121979116857819 0.593666335485096, -0.1416996355328412 0.5658834598381182, -0.1409470482999518 0.6339628455320763, -0.1078186128549057 0.6709738586399657))
2	131550000	135540000	2:131550000-135530000	101	-0.163093	0.602812	-0.535543	0.00165997	1	1.19492	POLYGON ((-0.1982356068896434 0.5637430005178561, -0.2151665432693704 0.5778840968586129, -0.2048742626537632 0.6187428921967861, -0.1409470482999518 0.6339628455320763, -0.1416996355328412 0.5658834598381182, -0.1502315009864348 0.5535198261530847, -0.1982356068896434 0.5637430005178561))
2	131550000	135540000	2:131550000-135530000	102	-0.174755	0.651793	-0.638796	0.000819984	1	1.26123	POLYGON ((-0.1844863789766949 0.6807080494075544, -0.1354110137675389 0.6922149662336229, -0.118040448289205 0.6887113977877065, -0.1078186128549057 0.6709738586399657, -0.1409470482999518 0.6339628455320763, -0.2048742626537632 0.6187428921967861, -0.2062551084638039 0.6225110486424719, -0.1910185591511263 0.6737230880860076, -0.1844863789766949 0.6807080494075544))
2	131550000	135540000	2:131550000-135530000	103	-0.213988	0.688483	0	3.99992e-05	1	2.03929	POLYGON ((-0.2543426458365335 0.7207349259045212, -0.2245679584894277 0.7259901178754721, -0.1844863789766949 0.6807080494075544, -0.1910185591511263 0.6737230880860076, -0.2352085609460857 0.6785321963823114, -0.2543426458365335 0.7207349259045212))
2	131550000	135540000	2:131550000-135530000	104	-0.256677	0.669129	-0.123527	0.000699986	1	1.52918	POLYGON ((-0.2705580709920344 0.7193640379266328, -0.2567042724672295 0.7214555502754766, -0.2543426458365335 0.7207349259045212, -0.2352085609460857 0.6785321963823114, -0.2387833465426556 0.6491850664957086, -0.2664520352962348 0.6445593423042643, -0.3008857888253423 0.6833020722679227, -0.2705580709920344 0.7193640379266328))
2	131550000	135540000	2:131550000-135530000	105	-0.291999	0.637735	-0.616202	0.0048599	1	1.06964	POLYGON ((-0.2664520352962348 0.6445593423042643, -0.274956752596345 0.6170560201943405, -0.3128636825746482 0.6144820908491466, -0.3155763572404551 0.6735122005667129, -0.312981543688537 0.679056098802579, -0.3008857888253423 0.6833020722679227, -0.2664520352962348 0.6445593423042643))
2	131550000	135540000	2:131550000-135530000	106	-0.335773	0.635724	-0.717728	0.0899982	1	0.695408	POLYGON ((-0.3545824525131444 0.5674644883841925, -0.3608752325187284 0.5694888150711211, -0.3674918438072555 0.5723904437591626, -0.3737784520947499 0.5759509985230072, -0.3796696506389691 0.5801334348583648, -0.3851041465953365 0.5848942381190504, -0.3900253987161746 0.5901838762493837, -0.394382205613667 0.5959473151225473, -0.4055717783292443 0.6124347459552046, -0.3155763572404551 0.67351220…
2	131550000	135540000	2:131550000-135530000	107	-0.358153	0.668698	-1.15435	0.0132197	1	1.0361	POLYGON ((-0.4055717783292443 0.6124347459552046, -0.4167613510448216 0.6289221767878619, -0.4204457164784502 0.6349834079493187, -0.4235053909727471 0.641382741026295, -0.4259096913705439 0.648056001956177, -0.4276345067649045 0.6549362696614708, -0.4322305126968382 0.678140520256978, -0.3400390936508063 0.6964006363104991, -0.312981543688537 0.679056098802579, -0.3155763572404551 0.673512200566…
2	131550000	135540000	2:131550000-135530000	108	-0.367345	0.715107	-1.78918	0.0165197	1	0.475177	POLYGON ((-0.4322305126968382 0.678140520256978, -0.4368265186287719 0.701344770852485, -0.4378369625645321 0.7081816046486529, -0.4381763168623558 0.7150843672814167, -0.4378413508596551 0.7219873442537645, -0.4368352534423233 0.7288248190281655, -0.4351676026864498 0.7355316986498798, -0.4328542746747635 0.7420441334337435, -0.4299172923558721 0.7483001248149916, -0.4263846158851635 0.754240115…
2	131550000	135540000	2:131550000-135530000	109	-0.32243	0.724426	-3.45161	0.00225995	2	-0.617311	POLYGON ((-0.3522470597655072 0.7552382579004514, -0.2951476237680685 0.7456640877173444, -0.2705580709920344 0.7193640379266328, -0.3008857888253423 0.6833020722679227, -0.312981543688537 0.679056098802579, -0.3400390936508063 0.6964006363104991, -0.3522470597655072 0.7552382579004514))
2	131550000	135540000	2:131550000-135530000	110	-0.31401	0.774639	-3.45161	0.0726585	2	-0.475066	POLYGON ((-0.3842730288480472 0.7839298425771195, -0.3838667784826159 0.7863526809324276, -0.3823726186397322 0.7931791658072069, -0.3802130657032115 0.7998251977433356, -0.3774091392942536 0.8062260887809043, -0.3739881309276866 0.8123195369949745, -0.3699833383749012 0.8180462329001918, -0.3654337415659655 0.8233504367290242, -0.3603836231854662 0.8281805209647928, -0.35488213765494 0.832489472…
2	131550000	135540000	2:131550000-135530000	111	-0.272126	0.771459	-0.70918	0.00339993	1	1.18383	POLYGON ((-0.2877041144905359 0.8436773906039348, -0.2667617954924343 0.8420869499069633, -0.2617611991998009 0.841527948214202, -0.2531286490668729 0.8402510550901044, -0.2524812306739918 0.8409215960022349, -0.2428211983793208 0.8153133139373583, -0.2567042724672295 0.7214555502754766, -0.2705580709920344 0.7193640379266328, -0.2951476237680685 0.7456640877173444, -0.2877041144905359 0.84367739…
2	131550000	135540000	2:131550000-135530000	112	-0.227468	0.764853	-3.45161	7.99984e-05	2	-0.867357	POLYGON ((-0.2567042724672295 0.7214555502754766, -0.2428211983793208 0.8153133139373583, -0.1892583853607435 0.7635975279273777, -0.1935578933837525 0.7483315820905501, -0.2245679584894277 0.7259901178754721, -0.2543426458365335 0.7207349259045212, -0.2567042724672295 0.7214555502754766))
2	131550000	135540000	2:131550000-135530000	113	-0.191853	0.801739	-0.796864	0.0135997	1	1.16978	POLYGON ((-0.2524812306739918 0.8409215960022349, -0.242809783282099 0.8509384587097066, -0.2379279905206895 0.8555374571513243, -0.2326331009700824 0.8596541101459577, -0.2269725875875349 0.8632515085777904, -0.2209972014429787 0.8662973988671473, -0.2147605166947274 0.8687644721498614, -0.2083184502539178 0.8706306091232765, -0.2017287604442827 0.8718790783636436, -0.1950505291521733 0.87249868…
2	131550000	135540000	2:131550000-135530000	114	-0.153211	0.784089	-0.223464	0.0185796	1	1.24111	POLYGON ((-0.1431035518589705 0.8573429513168985, -0.1237825066239135 0.8485178299003389, -0.1174294707238792 0.8452182943738991, -0.1114419305733841 0.8412943470267024, -0.1058810464352873 0.8367860693688793, -0.1008036204565584 0.8317395116046314, -0.0962615164576814 0.8262062222483129, -0.09230113016503516 0.8202427215775338, -0.08896291529760836 0.8139099243017437, -0.08628097034887917 0.8072…
2	131550000	135540000	2:131550000-135530000	115	-0.15601	0.744728	-0.136821	0.00113998	1	1.56991	POLYGON ((-0.1935578933837525 0.7483315820905501, -0.1892583853607435 0.7635975279273777, -0.1845792069409636 0.7665393271889483, -0.09946231498037145 0.7604866646244656, -0.118040448289205 0.6887113977877065, -0.1354110137675389 0.6922149662336229, -0.1935578933837525 0.7483315820905501))
2	131550000	135540000	2:131550000-135530000	116	-0.188622	0.710936	-2.03867	3.99992e-05	1	0.371646	POLYGON ((-0.2245679584894277 0.7259901178754721, -0.1935578933837525 0.7483315820905501, -0.1354110137675389 0.6922149662336229, -0.1844863789766949 0.6807080494075544, -0.2245679584894277 0.7259901178754721))
2	131550000	135540000	2:131550000-135530000	117	-0.216626	0.66425	-0.710718	0.000699986	1	1.21852	POLYGON ((-0.1910185591511263 0.6737230880860076, -0.2062551084638039 0.6225110486424719, -0.2387833465426556 0.6491850664957086, -0.2352085609460857 0.6785321963823114, -0.1910185591511263 0.6737230880860076))
2	131550000	135540000	2:131550000-135530000	118	-0.249217	0.624506	-3.45161	0.00149997	2	-0.620607	POLYGON ((-0.2151665432693704 0.5778840968586129, -0.2208239240911948 0.5768445847397345, -0.2507759613339036 0.5852096732803677, -0.274956752596345 0.6170560201943405, -0.2664520352962348 0.6445593423042643, -0.2387833465426556 0.6491850664957086, -0.2062551084638039 0.6225110486424719, -0.2048742626537632 0.6187428921967861, -0.2151665432693704 0.5778840968586129))
2	131550000	135540000	2:131550000-135530000	119	-0.289047	0.594263	-1.10694	0.0106198	1	0.800213	POLYGON ((-0.3441947446979586 0.5438561266153952, -0.3538163429477272 0.5655915779853363, -0.354534558351054 0.5674490812937839, -0.3545824525131444 0.5674644883841925, -0.3128636825746482 0.6144820908491466, -0.274956752596345 0.6170560201943405, -0.2507759613339036 0.5852096732803677, -0.3441947446979586 0.5438561266153952))
2	131550000	135540000	2:131550000-135530000	120	-0.269804	0.550792	-3.45161	0.0356593	2	-0.471657	POLYGON ((-0.2917207817486329 0.4791757963754, -0.311413048982263 0.4934702285107403, -0.3172038873542569 0.4981579247444061, -0.3224703018281596 0.5034279516531373, -0.3271540261648919 0.5092220030308162, -0.3312032408573992 0.5154759750009856, -0.33457314644819 0.522120675245454, -0.3441947446979586 0.5438561266153952, -0.2507759613339036 0.5852096732803677, -0.2208239240911948 0.57684458473973…
2	131550000	135540000	2:131550000-135530000	121	-0.230419	0.522203	-3.45161	0.257055	2	-0.161438	POLYGON ((-0.2833405144092848 0.4730926388934751, -0.2917207817486329 0.4791757963754, -0.2208239240911948 0.5768445847397345, -0.2151665432693704 0.5778840968586129, -0.1982356068896434 0.5637430005178561, -0.2150734319490953 0.4674670355376321, -0.2229812389605654 0.4646004725688039, -0.2833405144092848 0.4730926388934751))
2	131550000	135540000	2:131550000-135530000	122	-0.182061	0.513746	-3.45161	0.170057	2	-0.219213	POLYGON ((-0.2150734319490953 0.4674670355376321, -0.1982356068896434 0.5637430005178561, -0.1502315009864348 0.5535198261530847, -0.1433603521495865 0.5409926419814962, -0.1757813565327019 0.4635756717656194, -0.2150734319490953 0.4674670355376321))
2	131550000	135540000	2:131550000-135530000	123	-0.135625	0.494299	-1.99432	0.115538	1	0.140336	POLYGON ((-0.138792492357462 0.4436702812895043, -0.1483183903447498 0.4439766383936152, -0.1757813565327019 0.4635756717656194, -0.1433603521495865 0.5409926419814962, -0.09350662186807128 0.5132154048452525, -0.138792492357462 0.4436702812895043))
2	131550000	135540000	2:131550000-135530000	124	-0.0937712	0.467045	-3.45161	0.254595	2	-0.158485	POLYGON ((-0.09558221454191797 0.4173641253849164, -0.138792492357462 0.4436702812895043, -0.09350662186807128 0.5132154048452525, -0.07143559671109598 0.5146106837649872, -0.05093205538185921 0.5064448481417748, -0.04948831665801463 0.5050697250097365, -0.08969501939916995 0.4175663707574325, -0.09558221454191797 0.4173641253849164))
2	131550000	135540000	2:131550000-135530000	125	-0.0494967	0.446702	-3.45161	0.0704586	2	-0.330184	POLYGON ((-0.05253608306298744 0.3982883934127801, -0.08969501939916995 0.4175663707574325, -0.04948831665801463 0.5050697250097365, -0.003184011554768117 0.489184034661941, 0.005892651037437142 0.4819118732082924, -0.05253608306298744 0.3982883934127801))
2	131550000	135540000	2:131550000-135530000	126	-0.00812119	0.417792	-3.45161	0.184136	2	-0.217576	POLYGON ((-0.01305822368636069 0.3717943251611245, -0.04634070610882786 0.3880705559166808, -0.05253608306298744 0.3982883934127801, 0.005892651037437142 0.4819118732082924, 0.01214323494601591 0.4801092069038412, 0.05228726868043103 0.4529397158871217, -0.01305822368636069 0.3717943251611245))
2	131550000	135540000	2:131550000-135530000	127	0.0308289	0.386426	-0.204345	0.201576	1	0.475174	POLYGON ((0.06478423267011099 0.4500254710828635, 0.07525479657181341 0.4415936409148994, 0.08027049911309199 0.4371473684414144, 0.08484347008912688 0.43224690444875, 0.08893276023710442 0.4269361307784914, 0.1018617339413073 0.4083920565062207, 0.01589957345996987 0.3484590290548814, -0.00555095570698784 0.3594090658141725, -0.01305822368636069 0.3717943251611245, 0.05228726868043103 0.45293971…
2	131550000	135540000	2:131550000-135530000	128	0.0566868	0.349338	-1.85274	0.0118198	1	0.458812	POLYGON ((0.1018617339413073 0.4083920565062207, 0.1147907076455101 0.3898479822339499, 0.1180255153015963 0.3847595586215278, 0.1208158400011557 0.3794144558627067, 0.1231414620191205 0.3738514065495254, 0.1317944306889328 0.350393817997859, 0.04851095680926109 0.3196724465914729, 0.02785345468460568 0.3271632306957368, 0.01589957345996987 0.3484590290548814, 0.1018617339413073 0.408392056506220…
2	131550000	135540000	2:131550000-135530000	129	0.0739927	0.302423	-1.04561	0.00349993	1	1.67921	POLYGON ((0.1317944306889328 0.350393817997859, 0.1404473993587452 0.3269362294461925, 0.1425098841234936 0.3203820106060444, 0.1439276176688902 0.3136587926560127, 0.1446872590197398 0.3068298415632422, 0.1447816598959924 0.2999594182513979, 0.1442099319785751 0.2931121739007253, 0.1429774552685392 0.2863525415757693, 0.1410958274608611 0.2797441299055762, 0.1385827548092936 0.2733491245218947, …
2	131550000	135540000	2:131550000-135530000	130	0.0357724	0.291662	-0.205855	0.0135397	1	1.72207	POLYGON ((0.07407900985998735 0.2288612288284011, 0.05496882673294788 0.2234807242163384, 0.04835897913811651 0.2219571320168272, 0.04163370172945641 0.2210727892134555, 0.03485467101959914 0.2208358059817251, 0.02808405648465702 0.221248355659388, 0.02138395041726173 0.2223066548150912, 0.01481579848744117 0.2240009979456594, 0.008439836233575349 0.226315846483812, 0.002314536651288591 0.2292299…
2	131550000	135540000	2:131550000-135530000	131	-0.00609311	0.314098	-0.539535	0.0288594	1	1.01452	POLYGON ((-0.01861820622848757 0.2404480712930586, -0.03955094910826373 0.2516661712860788, -0.04406775705882662 0.2543059820948109, -0.06418766128170092 0.2670844218411076, -0.00555095570698784 0.3594090658141725, 0.01589957345996987 0.3484590290548814, 0.02785345468460568 0.3271632306957368, -0.01861820622848757 0.2404480712930586))
2	131550000	135540000	2:131550000-135530000	132	-0.0463329	0.339655	-0.887727	0.0385592	1	0.730305	POLYGON ((-0.06418766128170092 0.2670844218411076, -0.08430756550457517 0.2798628615874043, -0.08460007231837759 0.2800496440875171, -0.1046137747800228 0.2928986811781144, -0.1061644833034158 0.2948888436636741, -0.04634070610882786 0.3880705559166808, -0.01305822368636069 0.3717943251611245, -0.00555095570698784 0.3594090658141725, -0.06418766128170092 0.2670844218411076))
2	131550000	135540000	2:131550000-135530000	133	-0.0903661	0.367925	-0.698059	0.368233	1	0.126909	POLYGON ((-0.04634070610882786 0.3880705559166808, -0.1061644833034158 0.2948888436636741, -0.1194024395651032 0.3030263460301796, -0.1406441993761565 0.3299743177637386, -0.09558221454191797 0.4173641253849164, -0.08969501939916995 0.4175663707574325, -0.05253608306298744 0.3982883934127801, -0.04634070610882786 0.3880705559166808))
2	131550000	135540000	2:131550000-135530000	134	-0.138884	0.392943	-0.645298	0.364233	1	0.136535	POLYGON ((-0.1496737199479991 0.334393207087974, -0.1760401884920414 0.3645431283091346, -0.1781391269763187 0.3743939667710363, -0.1483183903447498 0.4439766383936152, -0.138792492357462 0.4436702812895043, -0.09558221454191797 0.4173641253849164, -0.1406441993761565 0.3299743177637386, -0.1496737199479991 0.334393207087974))
2	131550000	135540000	2:131550000-135530000	135	-0.19178	0.415612	-3.45161	0.184896	2	-0.229935	POLYGON ((-0.1781391269763187 0.3743939667710363, -0.2181451587950184 0.40395555263744, -0.2229812389605654 0.4646004725688039, -0.2150734319490953 0.4674670355376321, -0.1757813565327019 0.4635756717656194, -0.1483183903447498 0.4439766383936152, -0.1781391269763187 0.3743939667710363))
2	131550000	135540000	2:131550000-135530000	136	-0.246024	0.411286	-1.49147	0.436831	4	-0.0800685	POLYGON ((-0.292335969965806 0.3534467968979906, -0.3045754275243404 0.371424972587812, -0.3082445829682093 0.3774366870843803, -0.3112985805216527 0.3837830649334433, -0.3137072259359803 0.3904013607962432, -0.3154467054270048 0.3972261409362785, -0.3164998211170511 0.4041899301492641, -0.3168561610668531 0.411223878876664, -0.3165122022162662 0.4182584439071843, -0.3154713452160414 0.4252240759…
2	131550000	135540000	2:131550000-135530000	137	-0.221546	0.37533	-3.45161	0.129797	2	-0.333982	POLYGON ((-0.2834956237763582 0.3341233782406, -0.28656707217788 0.3449730342764081, -0.292335969965806 0.3534467968979906, -0.2181451587950184 0.40395555263744, -0.1781391269763187 0.3743939667710363, -0.1760401884920414 0.3645431283091346, -0.2834956237763582 0.3341233782406))
2	131550000	135540000	2:131550000-135530000	138	-0.209139	0.331504	-0.477778	0.386392	1	0.161627	POLYGON ((-0.263126122347127 0.280194152778355, -0.2730519214117624 0.3009713741516447, -0.2754107946577817 0.3065009192374474, -0.2772922884841128 0.312210571838805, -0.2834956237763582 0.3341233782406, -0.1760401884920414 0.3645431283091346, -0.1496737199479991 0.334393207087974, -0.263126122347127 0.280194152778355))
2	131550000	135540000	2:131550000-135530000	139	-0.189287	0.28995	-3.45161	0.175056	2	-0.287289	POLYGON ((-0.237602101125123 0.232643609606192, -0.2501466344060009 0.2537107016739967, -0.2532003232824915 0.2594169314050652, -0.263126122347127 0.280194152778355, -0.1496737199479991 0.334393207087974, -0.1406441993761565 0.3299743177637386, -0.1194024395651032 0.3030263460301796, -0.237602101125123 0.232643609606192))
2	131550000	135540000	2:131550000-135530000	140	-0.164198	0.247816	-3.45161	0.49291	3	0.0171844	POLYGON ((-0.2007881582632934 0.1824274311985745, -0.2170567587912042 0.2006657720123079, -0.2213182734618151 0.2059296736792904, -0.2250575678442451 0.2115765175383874, -0.237602101125123 0.232643609606192, -0.1194024395651032 0.3030263460301796, -0.1061644833034158 0.2948888436636741, -0.1046137747800228 0.2928986811781144, -0.1110750741480814 0.2970469128904994, -0.1068157818229126 0.289893924…
2	131550000	135540000	2:131550000-135530000	141	-0.131661	0.211339	-3.45161	0.294094	3	0.16106	POLYGON ((-0.1884912807365186 0.16864169450332, -0.2007881582632934 0.1824274311985745, -0.09507100519041249 0.2767271347656692, -0.07880240466250168 0.2584887939519359, -0.07304171242041366 0.2510997138477694, -0.05970770055356658 0.2314413925299229, -0.1483528329118655 0.1713144250390245, -0.1884912807365186 0.16864169450332))
2	131550000	135540000	2:131550000-135530000	142	-0.104993	0.172022	-3.45161	0.368453	3	0.109264	POLYGON ((-0.05970770055356658 0.2314413925299229, -0.0463736886867195 0.2117830712120765, -0.04266892456894843 0.2056801746915673, -0.03959732920623263 0.1992353376078149, -0.03719010786757451 0.1925140350156772, -0.03547171624474031 0.1855845506669728, -0.03445961199946923 0.1785172832951329, -0.03416407740579241 0.1713840314131154, -0.03458811488929205 0.1642572638905316, -0.03572741652454921 …
2	131550000	135540000	2:131550000-135530000	143	-0.126502	0.133856	-3.45161	0.0859183	3	0.295184	POLYGON ((-0.1951526010810775 0.1117567848546309, -0.1968058903653077 0.1252283688429674, -0.1973240182061174 0.1327069021906833, -0.1970488646147779 0.1401983111365016, -0.1959835115844075 0.1476186844703033, -0.1941398921255561 0.154884906651276, -0.1915386566046516 0.1619155887844049, -0.1883067080796684 0.1684347744910697, -0.1884912807365186 0.16864169450332, -0.1483528329118655 0.1713144250…
2	131550000	135540000	2:131550000-135530000	144	-0.122386	0.100324	-3.45161	0.0405192	3	0.335447	POLYGON ((-0.1132990583024513 0.05497725398116442, -0.1181449628941723 0.04989949988506022, -0.1492586325028067 0.04130201486794906, -0.1504091715333736 0.04226714969032164, -0.1920810548625003 0.1087892628817241, -0.09208636342570997 0.1210610307729739, -0.1132990583024513 0.05497725398116442))
2	131550000	135540000	2:131550000-135530000	145	-0.079517	0.0865626	-3.45161	0.00407992	3	0.577024	POLYGON ((-0.03951838273312627 0.1450135064793018, -0.03418275227145975 0.1409863684695603, -0.02917575085468931 0.1363912979538443, -0.02463216046131111 0.1313375347451902, -0.02059380663789386 0.1258716007327056, -0.01709786402855788 0.1200438120007617, -0.01417651416767332 0.1139078156495361, -0.01185664923610841 0.1075200959522388, -0.00961883676748744 0.1002954114395568, -0.00848168216403178…
2	131550000	135540000	2:131550000-135530000	146	-0.0675779	0.0480177	-3.45161	0.00583988	3	0.460519	POLYGON ((-0.1132990583024513 0.05497725398116442, -0.02692158646876845 0.08173227465204129, -0.04301836260310634 0.04401326392128539, -0.07862169742761536 0.02421038770752064, -0.1181449628941723 0.04989949988506022, -0.1132990583024513 0.05497725398116442))
2	131550000	135540000	2:131550000-135530000	147	-0.023135	0.0290514	-3.45161	0.0184796	3	0.577024	POLYGON ((-0.008481682164031789 0.09981012503550397, 0.004666989998877321 0.09419886354773729, 0.01076092250351036 0.09124632647206027, 0.01654506756292636 0.08772536715876168, 0.02196656172220638 0.08366816496572729, 0.0269758559280092 0.07911180017414388, 0.03152716837581505 0.07409791509800601, 0.03557890292687999 0.06867233349950642, 0.03909402927083255 0.062884641788615, 0.04204042135946523 …
2	131550000	135540000	2:131550000-135530000	148	-0.0302381	-0.0119664	-3.45161	0.00407992	3	0.577024	POLYGON ((-0.05810010042571026 -0.006763215825367921, -0.0336894217757457 0.009755230610553552, -0.02670658103126304 0.008546001464441393, -0.01518160089407073 -0.0284457909627567, -0.04346343801139646 -0.03817632551889121, -0.04800402832213001 -0.03533793171555505, -0.05810010042571026 -0.006763215825367921))
2	131550000	135540000	2:131550000-135530000	149	-0.076509	-0.0283149	-3.45161	0.00625987	3	0.458394	POLYGON ((-0.06874123741131312 -0.001601485118910583, -0.05810010042571026 -0.006763215825367921, -0.04800402832213001 -0.03533793171555505, -0.08653813988281454 -0.0530531664212498, -0.1076192945285464 -0.02460261739678534, -0.06874123741131312 -0.001601485118910583))
2	131550000	135540000	2:131550000-135530000	150	-0.0958945	0.00445182	-3.45161	0.0254595	3	0.357565	POLYGON ((-0.1181449628941723 0.04989949988506022, -0.07862169742761536 0.02421038770752064, -0.06874123741131312 -0.001601485118910583, -0.1076192945285464 -0.02460261739678534, -0.1269982882424546 -0.01902812050549078, -0.1492949787916851 0.009414132049025303, -0.1492586325028067 0.04130201486794906, -0.1181449628941723 0.04989949988506022))
2	131550000	135540000	2:131550000-135530000	151	-0.0525703	0.0210358	-3.45161	0.00141997	3	0.577024	POLYGON ((-0.07862169742761536 0.02421038770752064, -0.04301836260310634 0.04401326392128539, -0.0336894217757457 0.009755230610553552, -0.05810010042571026 -0.006763215825367921, -0.06874123741131312 -0.001601485118910583, -0.07862169742761536 0.02421038770752064))
2	131550000	135540000	2:131550000-135530000	152	-0.0121494	-0.00633074	-3.45161	0.0115998	3	0.577024	POLYGON ((0.04760401851058389 0.03161827337935369, 0.04760415597969525 0.03161624352250972, 0.05056072760739738 0.02660220620551574, 0.05349314358965802 0.02028120343744839, 0.05579029361175996 0.01370265942962342, 0.05742994664265067 0.006930239077546655, 0.05839623468194084 2.948354557354236e-05, 0.05867980632497664 -0.006932824018029109, 0.05827791726253089 -0.0138893047855163, 0.0558969312785…
2	131550000	135540000	2:131550000-135530000	153	-0.0169114	-0.0507006	-3.45161	0.0305794	3	0.577024	POLYGON ((0.05589693127854277 -0.03607425144409088, 0.05351594529455465 -0.05825919810266535, 0.05238040930892889 -0.06539035405712995, 0.05052472786448875 -0.07236884054048059, 0.04796818695335622 -0.07912213053804863, 0.04473735656038473 -0.08558003748948412, 0.04086581452281192 -0.09167544473370115, 0.03639379755769945 -0.09734500304853425, 0.03136778308401217 -0.1025297890356154, 0.0258400061…
2	131550000	135540000	2:131550000-135530000	154	-0.0612315	-0.0615466	-3.45161	0.00235995	3	0.577024	POLYGON ((-0.02223442662435823 -0.1249251482152742, -0.04439447908457489 -0.1303481152526691, -0.05059426762043757 -0.1315750411454145, -0.05687874164382707 -0.132244452293399, -0.06319786883829354 -0.1323510193420472, -0.06950134100456626 -0.1318938938836352, -0.0954479012521956 -0.1288436747292364, -0.08653813988281454 -0.0530531664212498, -0.04800402832213001 -0.03533793171555505, -0.043463438…
2	131550000	135540000	2:131550000-135530000	155	-0.113125	-0.0554461	-3.45161	0.0286394	3	0.359553	POLYGON ((-0.0954479012521956 -0.1288436747292364, -0.121394461499825 -0.1257934555748375, -0.1314609701317942 -0.123863336378526, -0.1448567335842096 -0.1202731602206902, -0.1520526322562632 -0.1125115739933934, -0.1269982882424546 -0.01902812050549078, -0.1076192945285464 -0.02460261739678534, -0.08653813988281454 -0.0530531664212498, -0.0954479012521956 -0.1288436747292364))
2	131550000	135540000	2:131550000-135530000	156	-0.157225	-0.0436269	-3.45161	0.362753	3	0.0697228	POLYGON ((-0.1894312693339487 -0.09274682173690615, -0.1727850656365271 -0.012750961900977, -0.1492949787916851 0.009414132049025303, -0.1269982882424546 -0.01902812050549078, -0.1520526322562632 -0.1125115739933934, -0.1894312693339487 -0.09274682173690615))
2	131550000	135540000	2:131550000-135530000	157	-0.19937	-0.034857	-0.71862	0.396292	1	0.0840174	POLYGON ((-0.2153286218767095 -0.08985480607980353, -0.2614327474641157 -0.04412463912261715, -0.2473030500532605 -0.01905651685223721, -0.1727850656365271 -0.012750961900977, -0.1894312693339487 -0.09274682173690615, -0.2153286218767095 -0.08985480607980353))
2	131550000	135540000	2:131550000-135530000	158	-0.202707	0.00457357	-3.45161	0.406232	2	-0.0401669	POLYGON ((-0.1727850656365271 -0.012750961900977, -0.2473030500532605 -0.01905651685223721, -0.244925181631002 0.002389066013587009, -0.2356040961990859 0.01485068470200203, -0.1504091715333736 0.04226714969032164, -0.1492586325028067 0.04130201486794906, -0.1492949787916851 0.009414132049025303, -0.1727850656365271 -0.012750961900977))
2	131550000	135540000	2:131550000-135530000	159	-0.214875	0.0423854	-0.767589	0.424252	4	-0.092666	POLYGON ((-0.2082111024502567 0.1144765343020241, -0.2079311311103923 0.1128147120775592, -0.2061987389974816 0.1126837800329737, -0.1995888174340761 0.1115480748791242, -0.1949733419930971 0.1102961186043648, -0.1951526010810775 0.1117567848546309, -0.1920810548625003 0.1087892628817241, -0.1504091715333736 0.04226714969032164, -0.2356040961990859 0.01485068470200203, -0.2337624727967414 0.08043…
2	131550000	135540000	2:131550000-135530000	160	-0.254756	0.0435053	-0.960486	0.178836	1	0.278631	POLYGON ((-0.244925181631002 0.002389066013587009, -0.2825613991891551 0.04147831592870057, -0.279063186134635 0.05920958128469406, -0.2337624727967414 0.08043091044629481, -0.2356040961990859 0.01485068470200203, -0.244925181631002 0.002389066013587009))
2	131550000	135540000	2:131550000-135530000	161	-0.28564	0.0137691	-0.31034	0.00177996	1	1.24018	POLYGON ((-0.2614327474641157 -0.04412463912261715, -0.2814198607013589 -0.04669651790405505, -0.3071197511209912 -0.04225359423379463, -0.3391675937986169 0.004387804460338825, -0.3370226757316855 0.01180346251754452, -0.2825613991891551 0.04147831592870057, -0.244925181631002 0.002389066013587009, -0.2473030500532605 -0.01905651685223721, -0.2614327474641157 -0.04412463912261715))
2	131550000	135540000	2:131550000-135530000	162	-0.307514	0.0539141	-0.948605	0.131257	1	0.325136	POLYGON ((-0.2825613991891551 0.04147831592870057, -0.3370226757316855 0.01180346251754452, -0.3440577869369815 0.05066086622428256, -0.3279708382681382 0.08103299928176186, -0.3099059175189917 0.08816741605106819, -0.279063186134635 0.05920958128469406, -0.2825613991891551 0.04147831592870057))
2	131550000	135540000	2:131550000-135530000	163	-0.27557	0.0879373	-3.06132	0.282694	2	-0.0675526	POLYGON ((-0.2093983593812194 0.1215237197567207, -0.2082111024502567 0.1144765343020241, -0.2337624727967414 0.08043091044629481, -0.279063186134635 0.05920958128469406, -0.3099059175189917 0.08816741605106819, -0.3013300196632139 0.1060357633879877, -0.2093983593812194 0.1215237197567207))
2	131550000	135540000	2:131550000-135530000	164	-0.282922	0.131575	-3.45161	0.420852	3	0.0502904	POLYGON ((-0.2575260557468788 0.2017902460112052, -0.2389959643727492 0.1871421355504672, -0.2334143230557124 0.182232602273744, -0.228377951061752 0.176765135408206, -0.223942318472884 0.1707999530703493, -0.2201562788892379 0.1644027551635803, -0.2170615313605409 0.1576439997662509, -0.2146921611170821 0.1505981271136467, -0.2130742641584992 0.1433427397209079, -0.2093983593812194 0.12152371975…
2	131550000	135540000	2:131550000-135530000	165	-0.319982	0.160872	-3.45161	0.290414	3	0.134531	POLYGON ((-0.3064254595082309 0.2351793426918211, -0.2838584969250526 0.2217997197135044, -0.2760561471210084 0.2164383564719431, -0.2575260557468788 0.2017902460112052, -0.3110119404386422 0.1341297560646673, -0.3415396209480362 0.1418064531173055, -0.3467501207757177 0.1671650852289999, -0.3064254595082309 0.2351793426918211))
2	131550000	135540000	2:131550000-135530000	166	-0.365116	0.187631	-3.45161	0.131097	3	0.266106	POLYGON ((-0.3935628861121936 0.2524626085409888, -0.3935294815353861 0.2524172431861196, -0.390517737192721 0.2537510288787598, -0.383774914820858 0.2559607373100143, -0.3768448429353105 0.2574847348660483, -0.3697970668637692 0.2583077277791802, -0.3627023131303573 0.2584214570713246, -0.3556317796939739 0.2578247814352888, -0.3486564214556508 0.2565236886881285, -0.3418462382050666 0.254531235…
2	131550000	135540000	2:131550000-135530000	167	-0.368868	0.150827	-3.45161	0.0944781	3	0.252529	POLYGON ((-0.4010370207146335 0.1726998464510508, -0.3467501207757177 0.1671650852289999, -0.3415396209480362 0.1418064531173055, -0.3657437247352857 0.1167362285610606, -0.369803521564919 0.1163207709638503, -0.4027274034110811 0.1536049509337666, -0.4010370207146335 0.1726998464510508))
2	131550000	135540000	2:131550000-135530000	168	-0.331564	0.114812	-3.45161	0.251775	2	-0.122193	POLYGON ((-0.3657437247352857 0.1167362285610606, -0.3415396209480362 0.1418064531173055, -0.3110119404386422 0.1341297560646673, -0.3013300196632139 0.1060357633879877, -0.3099059175189917 0.08816741605106819, -0.3279708382681382 0.08103299928176186, -0.3657437247352857 0.1167362285610606))
2	131550000	135540000	2:131550000-135530000	169	-0.361898	0.0827194	-1.11876	0.156617	1	0.243209	POLYGON ((-0.3782759935383167 0.06499808138246552, -0.3810375021960539 0.1034693147534251, -0.369803521564919 0.1163207709638503, -0.3657437247352857 0.1167362285610606, -0.3279708382681382 0.08103299928176186, -0.3440577869369815 0.05066086622428256, -0.3782759935383167 0.06499808138246552))
2	131550000	135540000	2:131550000-135530000	170	-0.40416	0.119662	-3.45161	0.418852	2	-0.0327881	POLYGON ((-0.3810375021960539 0.1034693147534251, -0.4237537109489384 0.09573716245261424, -0.4358663721766063 0.1038190356638427, -0.4403476754367239 0.1208123161820753, -0.4027274034110811 0.1536049509337666, -0.369803521564919 0.1163207709638503, -0.3810375021960539 0.1034693147534251))
2	131550000	135540000	2:131550000-135530000	171	-0.436548	0.156818	-3.45161	0.122518	3	0.204725	POLYGON ((-0.4103294408627583 0.1942422905325061, -0.4010370207146335 0.1726998464510508, -0.4027274034110811 0.1536049509337666, -0.4403476754367239 0.1208123161820753, -0.4737287662546519 0.1419382325809473, -0.4483383131937532 0.1836394617169333, -0.4103294408627583 0.1942422905325061))
2	131550000	135540000	2:131550000-135530000	172	-0.477579	0.1818	-3.45161	0.195816	3	0.157653	POLYGON ((-0.4737287662546519 0.1419382325809473, -0.493568517774141 0.140368451167143, -0.5052137268667805 0.1464861367325658, -0.5132742616528077 0.1588464508332014, -0.503288915820747 0.1943177025722388, -0.4790241027155339 0.2089155187934927, -0.4483383131937532 0.1836394617169333, -0.4737287662546519 0.1419382325809473))
2	131550000	135540000	2:131550000-135530000	173	-0.452134	0.212691	-3.45161	0.0112398	3	0.577024	POLYGON ((-0.4630985968005541 0.2872036048132913, -0.4380146259286388 0.2821009774940994, -0.431287375314128 0.2803853006091813, -0.4247603991118132 0.278019285043236, -0.4184964017306361 0.2750256610166616, -0.412555561152134 0.2714331881601598, -0.40699495080289 0.267276379222073, -0.4018679912523218 0.2625951685057396, -0.3972239370033294 0.2574345282221803, -0.3935628861121936 0.2524626085409…
2	131550000	135540000	2:131550000-135530000	174	-0.502302	0.222896	-3.45161	0.052419	3	0.577024	POLYGON ((-0.5637479236326337 0.2632121408943596, -0.54902229998221 0.2761347601506954, -0.5433395368034137 0.280628759594214, -0.5372274357765711 0.2845187530880771, -0.5307499423536424 0.2877640431060174, -0.5239748247607547 0.290330677078202, -0.5169729649998023 0.2921918026066344, -0.5098176172733924 0.2933279483978022, -0.5025836415915753 0.2937272279734241, -0.4953467205784461 0.29338546402…
2	131550000	135540000	2:131550000-135530000	175	-0.531753	0.197051	-3.45161	0.107958	3	0.281203	POLYGON ((-0.5770450547106668 0.2548921742980466, -0.5697597422554429 0.2579364089494871, -0.5637479236326337 0.2632121408943596, -0.503288915820747 0.1943177025722388, -0.5132742616528077 0.1588464508332014, -0.5399753993660861 0.166178900613659, -0.5770450547106668 0.2548921742980466))
2	131550000	135540000	2:131550000-135530000	176	-0.567718	0.182023	-3.45161	0.205776	3	0.215465	POLYGON ((-0.6316800863216475 0.2184964894552512, -0.6173272382365423 0.2325801383122229, -0.612306084556052 0.237059355027436, -0.606882561548262 0.2410419126037829, -0.6011056118594731 0.2444918718728393, -0.5950273675088376 0.24737809990938, -0.5770450547106668 0.2548921742980466, -0.5399753993660861 0.166178900613659, -0.5687862147085234 0.1544004448921674, -0.6316800863216475 0.2184964894552…
2	131550000	135540000	2:131550000-135530000	177	-0.596424	0.153855	-1.13392	0.333473	4	-0.16362	POLYGON ((-0.6657435429837807 0.1313575743845444, -0.6647184786584092 0.1317706153328301, -0.6664568505949346 0.1432490454987951, -0.6671452475735783 0.1499058534787152, -0.6672023273439638 0.1565979177926276, -0.6666275803664125 0.1632654997226471, -0.6654261372920861 0.1698490791002258, -0.6636087231626919 0.1762898856307781, -0.6611915616701827 0.18253042352433, -0.658196230331108 0.1885149847…
2	131550000	135540000	2:131550000-135530000	178	-0.590149	0.112426	-3.45161	0.371013	2	-0.0552874	POLYGON ((-0.5955212616611034 0.08300318252926114, -0.6466284861621954 0.1250619623371452, -0.5759751097710859 0.1357621926790308, -0.5624451400672518 0.1113762410163548, -0.5944016410961454 0.082699022384138, -0.5955212616611034 0.08300318252926114))
2	131550000	135540000	2:131550000-135530000	179	-0.548673	0.135438	-3.45161	0.335253	3	0.0810236	POLYGON ((-0.5687862147085234 0.1544004448921674, -0.5399753993660861 0.166178900613659, -0.5132742616528077 0.1588464508332014, -0.5052137268667805 0.1464861367325658, -0.5471867326480345 0.1067392100917552, -0.5624451400672518 0.1113762410163548, -0.5759751097710859 0.1357621926790308, -0.5687862147085234 0.1544004448921674))
2	131550000	135540000	2:131550000-135530000	180	-0.518612	0.103693	-3.45161	0.235695	2	-0.116969	POLYGON ((-0.4954555703685165 0.08860279189118284, -0.5365990898406416 0.08247134849268857, -0.5471867326480345 0.1067392100917552, -0.5052137268667805 0.1464861367325658, -0.493568517774141 0.140368451167143, -0.4954555703685165 0.08860279189118284))
2	131550000	135540000	2:131550000-135530000	181	-0.471262	0.101967	-3.45161	0.136837	2	-0.175181	POLYGON ((-0.4358663721766063 0.1038190356638427, -0.4700914055735973 0.07017399345213547, -0.481103790628567 0.07117970224228946, -0.4954555703685165 0.08860279189118284, -0.493568517774141 0.140368451167143, -0.4737287662546519 0.1419382325809473, -0.4403476754367239 0.1208123161820753, -0.4358663721766063 0.1038190356638427))
2	131550000	135540000	2:131550000-135530000	182	-0.438323	0.0684601	-3.45161	0.0098798	2	-0.379672	POLYGON ((-0.4157061622693469 0.0400764986806113, -0.4467975434984111 0.03946707314822821, -0.4700914055735973 0.07017399345213547, -0.4358663721766063 0.1038190356638427, -0.4237537109489384 0.09573716245261424, -0.4108717549860751 0.05040661394082313, -0.4157061622693469 0.0400764986806113))
2	131550000	135540000	2:131550000-135530000	183	-0.397017	0.0801986	-0.668101	0.145397	1	0.318669	POLYGON ((-0.4108717549860751 0.05040661394082313, -0.4237537109489384 0.09573716245261424, -0.3810375021960539 0.1034693147534251, -0.3782759935383167 0.06499808138246552, -0.4108717549860751 0.05040661394082313))
2	131550000	135540000	2:131550000-135530000	184	-0.379423	0.040895	-3.45161	0.00455991	2	-0.449339	POLYGON ((-0.3391675937986169 0.004387804460338825, -0.3700545910993191 -0.000184535265997203, -0.413873880450675 0.03655588584642968, -0.4157061622693469 0.0400764986806113, -0.4108717549860751 0.05040661394082313, -0.3782759935383167 0.06499808138246552, -0.3440577869369815 0.05066086622428256, -0.3370226757316855 0.01180346251754452, -0.3391675937986169 0.004387804460338825))
2	131550000	135540000	2:131550000-135530000	185	-0.412138	0.00187577	-0.217373	9.9998e-05	1	1.49399	POLYGON ((-0.3700545910993191 -0.000184535265997203, -0.3858553847369313 -0.01631754426167474, -0.4307928985212708 -0.0107949565500717, -0.413873880450675 0.03655588584642968, -0.3700545910993191 -0.000184535265997203))
2	131550000	135540000	2:131550000-135530000	186	-0.46854	-0.00287564	-1.30332	1.99996e-05	1	0.903869	POLYGON ((-0.4599103939403455 -0.05314335229653282, -0.4945022417551954 -0.03189039776853123, -0.4906416116213509 0.01452089394867577, -0.4601616972802204 0.02066253027904423, -0.443348096378066 -0.01779624215346371, -0.4599103939403455 -0.05314335229653282))
2	131550000	135540000	2:131550000-135530000	187	-0.515314	0.00101518	-0.578013	0.00259995	1	0.948614	POLYGON ((-0.5366380513775724 -0.03317205380154999, -0.5444656995040785 0.01873084522517691, -0.5351548320216014 0.03487938975964752, -0.5100982321772588 0.0340838338478025, -0.4906416116213509 0.01452089394867577, -0.4945022417551954 -0.03189039776853123, -0.5333766207740256 -0.0356342299423268, -0.5366380513775724 -0.03317205380154999))
2	131550000	135540000	2:131550000-135530000	188	-0.567096	-0.00679425	-3.45161	0.00565989	2	-0.413569	POLYGON ((-0.5366380513775724 -0.03317205380154999, -0.5943416057556835 -0.03668049249797074, -0.6016005275818939 -0.03272491132787909, -0.5887329415945394 0.01100742469226031, -0.5444656995040785 0.01873084522517691, -0.5366380513775724 -0.03317205380154999))
2	131550000	135540000	2:131550000-135530000	189	-0.574403	0.0350844	-0.842107	0.0662787	1	0.420251	POLYGON ((-0.5444656995040785 0.01873084522517691, -0.5887329415945394 0.01100742469226031, -0.6002935476490994 0.02884531753767328, -0.5796518355289328 0.06151377597746767, -0.5455134395329163 0.05448560561327957, -0.5351548320216014 0.03487938975964752, -0.5444656995040785 0.01873084522517691))
2	131550000	135540000	2:131550000-135530000	190	-0.62336	0.0720699	-3.45161	0.424832	2	-0.0360759	POLYGON ((-0.6719817531355676 0.1288439406808582, -0.6657435429837807 0.1313575743845444, -0.6466284861621954 0.1250619623371452, -0.5955212616611034 0.08300318252926114, -0.6365654074483709 0.04094942889058449, -0.6719817531355676 0.1288439406808582))
2	131550000	135540000	2:131550000-135530000	191	-0.667658	0.0542204	-1.47145	0.368693	4	-0.100989	POLYGON ((-0.7332620290634373 0.02158406258572629, -0.7370390582066587 0.03995856363811875, -0.7381113011316669 0.04690851111216318, -0.7384891198626291 0.05393052847106612, -0.7381687904248809 0.0609554031200198, -0.7371534701492074 0.06791389430130379, -0.7354531665515758 0.07473741556660962, -0.733084638693939 0.08135871080015715, -0.7300712319983497 0.08771251712937253, -0.7264426481425384 0.…
2	131550000	135540000	2:131550000-135530000	192	-0.657356	0.00410193	-3.45161	0.0726185	2	-0.292374	POLYGON ((-0.6410994308281344 -0.03912675450613122, -0.7027365525801694 -0.01047158646149561, -0.7241935919169418 0.01648095305439646, -0.6394675927844418 0.03389707591942205, -0.6330907027297796 -0.03720193460239976, -0.6353945011604388 -0.03872098919641956, -0.6410994308281344 -0.03912675450613122))
2	131550000	135540000	2:131550000-135530000	193	-0.616563	0.00776064	-3.45161	0.0118398	2	-0.403359	POLYGON ((-0.6330907027297796 -0.03720193460239976, -0.6394675927844418 0.03389707591942205, -0.6365230899017003 0.03713534634557342, -0.6002935476490994 0.02884531753767328, -0.5887329415945394 0.01100742469226031, -0.6016005275818939 -0.03272491132787909, -0.6330907027297796 -0.03720193460239976))
2	131550000	135540000	2:131550000-135530000	194	-0.605775	0.054907	-3.45161	0.0465391	2	-0.313256	POLYGON ((-0.6365654074483709 0.04094942889058449, -0.5955212616611034 0.08300318252926114, -0.5944016410961454 0.082699022384138, -0.5796518355289328 0.06151377597746767, -0.6002935476490994 0.02884531753767328, -0.6365230899017003 0.03713534634557342, -0.6365654074483709 0.04094942889058449))
2	131550000	135540000	2:131550000-135530000	195	-0.56439	0.0837205	-0.414588	0.466791	1	0.012833	POLYGON ((-0.5796518355289328 0.06151377597746767, -0.5944016410961454 0.082699022384138, -0.5624451400672518 0.1113762410163548, -0.5471867326480345 0.1067392100917552, -0.5365990898406416 0.08247134849268857, -0.5455134395329163 0.05448560561327957, -0.5796518355289328 0.06151377597746767))
2	131550000	135540000	2:131550000-135530000	196	-0.513206	0.0674168	-0.280348	0.0709586	1	0.528702	POLYGON ((-0.4954555703685165 0.08860279189118284, -0.481103790628567 0.07117970224228946, -0.5100982321772588 0.0340838338478025, -0.5351548320216014 0.03487938975964752, -0.5455134395329163 0.05448560561327957, -0.5365990898406416 0.08247134849268857, -0.4954555703685165 0.08860279189118284))
2	131550000	135540000	2:131550000-135530000	197	-0.477002	0.0391193	-0.711684	0.0283594	1	0.563768	POLYGON ((-0.4467975434984111 0.03946707314822821, -0.4601616972802204 0.02066253027904423, -0.4906416116213509 0.01452089394867577, -0.5100982321772588 0.0340838338478025, -0.481103790628567 0.07117970224228946, -0.4700914055735973 0.07017399345213547, -0.4467975434984111 0.03946707314822821))
2	131550000	135540000	2:131550000-135530000	198	-0.437194	0.0108284	-1.15019	3.99992e-05	1	0.885735	POLYGON ((-0.443348096378066 -0.01779624215346371, -0.4601616972802204 0.02066253027904423, -0.4467975434984111 0.03946707314822821, -0.4157061622693469 0.0400764986806113, -0.413873880450675 0.03655588584642968, -0.4307928985212708 -0.0107949565500717, -0.443348096378066 -0.01779624215346371))
2	131550000	135540000	2:131550000-135530000	199	-0.415761	-0.0276055	-0.747716	1.99996e-05	1	1.24969	POLYGON ((-0.4019200541534469 -0.06979992033188498, -0.4278625376700456 -0.07556593353037701, -0.4529434778643937 -0.06909995178056383, -0.4599103939403455 -0.05314335229653282, -0.443348096378066 -0.01779624215346371, -0.4307928985212708 -0.0107949565500717, -0.3858553847369313 -0.01631754426167474, -0.4019200541534469 -0.06979992033188498))
2	131550000	135540000	2:131550000-135530000	200	-0.367119	-0.0422163	-1.25541	0.000299994	1	0.820469	POLYGON ((-0.3071197511209912 -0.04225359423379463, -0.3212918720285426 -0.05675747411411845, -0.3987005413983896 -0.07112358434188529, -0.4019200541534469 -0.06979992033188498, -0.3858553847369313 -0.01631754426167474, -0.3700545910993191 -0.000184535265997203, -0.3391675937986169 0.004387804460338825, -0.3071197511209912 -0.04225359423379463))
2	131550000	135540000	2:131550000-135530000	201	-0.35885	-0.0867739	-0.0618285	0.0377192	1	0.807432	POLYGON ((-0.337866945942737 -0.1137386557702251, -0.351708184359351 -0.1235998057360249, -0.3604709939876708 -0.1243341374197369, -0.3987005413983896 -0.07112358434188529, -0.3212918720285426 -0.05675747411411845, -0.337866945942737 -0.1137386557702251))
2	131550000	135540000	2:131550000-135530000	202	-0.396585	-0.113885	-0.919811	0.00525989	1	0.704706	POLYGON ((-0.3604709939876708 -0.1243341374197369, -0.3834991458250518 -0.1457761774048819, -0.4126046689872298 -0.1459249635715386, -0.4278625376700456 -0.07556593353037701, -0.4019200541534469 -0.06979992033188498, -0.3987005413983896 -0.07112358434188529, -0.3604709939876708 -0.1243341374197369))
2	131550000	135540000	2:131550000-135530000	203	-0.440457	-0.123399	-1.14173	0.00425991	1	0.612021	POLYGON ((-0.4278625376700456 -0.07556593353037701, -0.4126046689872298 -0.1459249635715386, -0.4319351765137316 -0.1616306131345781, -0.4838213442474955 -0.1131905247722053, -0.4815761757422659 -0.1044497851295181, -0.4529434778643937 -0.06909995178056383, -0.4278625376700456 -0.07556593353037701))
2	131550000	135540000	2:131550000-135530000	204	-0.470661	-0.155752	-3.45161	0.0841983	2	-0.237242	POLYGON ((-0.4838213442474955 -0.1131905247722053, -0.4319351765137316 -0.1616306131345781, -0.4389308604112316 -0.1852384655570758, -0.4439940123604025 -0.1894339725743651, -0.4956517004102508 -0.1864718670346841, -0.4954549016413847 -0.1251571831790916, -0.4838213442474955 -0.1131905247722053))
2	131550000	135540000	2:131550000-135530000	205	-0.520444	-0.155592	-0.443305	0.121878	1	0.419978	POLYGON ((-0.5351537096909313 -0.1297531633617273, -0.4954549016413847 -0.1251571831790916, -0.4956517004102508 -0.1864718670346841, -0.5058463784545003 -0.1937872414434841, -0.5545467829709044 -0.1916514009841633, -0.5577033795952135 -0.1822818399714647, -0.555548930072462 -0.1686801347004748, -0.5351537096909313 -0.1297531633617273))
2	131550000	135540000	2:131550000-135530000	206	-0.564771	-0.132368	-3.45161	0.0178196	2	-0.372989	POLYGON ((-0.5933930499228796 -0.1101833491777298, -0.5754524669933677 -0.09752931732043037, -0.5613464988971169 -0.09775210855096968, -0.5351537096909313 -0.1297531633617273, -0.555548930072462 -0.1686801347004748, -0.5933930499228796 -0.1101833491777298))
2	131550000	135540000	2:131550000-135530000	207	-0.526737	-0.101237	-0.612378	0.0133597	1	0.754189	POLYGON ((-0.5613464988971169 -0.09775210855096968, -0.5369600338720971 -0.07416535179860362, -0.4815761757422659 -0.1044497851295181, -0.4838213442474955 -0.1131905247722053, -0.4954549016413847 -0.1251571831790916, -0.5351537096909313 -0.1297531633617273, -0.5613464988971169 -0.09775210855096968))
2	131550000	135540000	2:131550000-135530000	208	-0.508652	-0.068163	-0.604675	5.99988e-05	1	1.31699	POLYGON ((-0.5369600338720971 -0.07416535179860362, -0.5333766207740256 -0.0356342299423268, -0.4945022417551954 -0.03189039776853123, -0.4599103939403455 -0.05314335229653282, -0.4529434778643937 -0.06909995178056383, -0.4815761757422659 -0.1044497851295181, -0.5369600338720971 -0.07416535179860362))
2	131550000	135540000	2:131550000-135530000	209	-0.563676	-0.0630457	-0.338698	0.00663987	1	0.915248	POLYGON ((-0.5943416057556835 -0.03668049249797074, -0.5366380513775724 -0.03317205380154999, -0.5333766207740256 -0.0356342299423268, -0.5369600338720971 -0.07416535179860362, -0.5613464988971169 -0.09775210855096968, -0.5754524669933677 -0.09752931732043037, -0.5943416057556835 -0.03668049249797074))
2	131550000	135540000	2:131550000-135530000	210	-0.604686	-0.0757764	-0.388461	0.0223596	1	0.79966	POLYGON ((-0.6240586359926745 -0.1009899082459147, -0.6353945011604388 -0.03872098919641956, -0.6330907027297796 -0.03720193460239976, -0.6016005275818939 -0.03272491132787909, -0.5943416057556835 -0.03668049249797074, -0.5754524669933677 -0.09752931732043037, -0.5933930499228796 -0.1101833491777298, -0.5991373747025388 -0.1118169929790717, -0.6240586359926745 -0.1009899082459147))
2	131550000	135540000	2:131550000-135530000	211	-0.651074	-0.0842211	-0.153909	0.0858383	1	0.635867	POLYGON ((-0.6836156403490142 -0.08722597609836821, -0.6410994308281344 -0.03912675450613122, -0.6353945011604388 -0.03872098919641956, -0.6240586359926745 -0.1009899082459147, -0.6728099029598666 -0.1230748138157826, -0.6770936125647202 -0.1222761867584538, -0.6836156403490142 -0.08722597609836821))
2	131550000	135540000	2:131550000-135530000	212	-0.684628	-0.0545613	-3.45161	0.00967981	2	-0.448858	POLYGON ((-0.6836156403490142 -0.08722597609836821, -0.7071238733305535 -0.0700147893191579, -0.7027365525801694 -0.01047158646149561, -0.6410994308281344 -0.03912675450613122, -0.6836156403490142 -0.08722597609836821))
2	131550000	135540000	2:131550000-135530000	213	-0.727111	-0.051431	-3.45161	0.0920982	2	-0.388082	POLYGON ((-0.7327487029028938 0.01908683216481393, -0.7332620290634373 0.02158406258572629, -0.7241935919169418 0.01648095305439646, -0.7027365525801694 -0.01047158646149561, -0.7071238733305535 -0.0700147893191579, -0.7894754846880645 -0.0922185170786201, -0.795501049000379 -0.06987024584087953, -0.7970049064986994 -0.06292222076738067, -0.7978047414137227 -0.05585844671196763, -0.79789249716579…
2	131550000	135540000	2:131550000-135530000	214	-0.71506	-0.0961275	-0.913205	0.00785984	1	1.00258	POLYGON ((-0.7886812607433284 -0.1043938535010509, -0.7876598044311637 -0.0989527103855113, -0.7894754846880645 -0.0922185170786201, -0.7071238733305535 -0.0700147893191579, -0.6836156403490142 -0.08722597609836821, -0.6770936125647202 -0.1222761867584538, -0.6806136367995534 -0.1246812001622265, -0.7886812607433284 -0.1043938535010509))
2	131550000	135540000	2:131550000-135530000	215	-0.723071	-0.138798	-0.15087	0.0141997	1	1.49216	POLYGON ((-0.7708175533080602 -0.1955208656947621, -0.7826620273643816 -0.1770865115605917, -0.7860117546699265 -0.1712874208729283, -0.7887988284504016 -0.1651978933405627, -0.790998333979764 -0.1588723655956583, -0.7925906090308857 -0.1523673839671811, -0.7935614196437754 -0.1457410989914838, -0.7939020873684294 -0.1390527455822634, -0.7936095668448394 -0.1323621135068516, -0.7926864730266383 -…
2	131550000	135540000	2:131550000-135530000	216	-0.699382	-0.175667	-0.949463	0.0812184	1	0.53143	POLYGON ((-0.7603709927540745 -0.21613302403767, -0.763589662497524 -0.2067701198373238, -0.7708175533080602 -0.1955208656947621, -0.6901450949391847 -0.1436870540377191, -0.678646803208222 -0.1880388376003636, -0.7603709927540745 -0.21613302403767))
2	131550000	135540000	2:131550000-135530000	217	-0.687392	-0.210545	-0.866391	0.187476	1	0.36134	POLYGON ((-0.7037407829072819 -0.2794028217346514, -0.7052814218240002 -0.2790806975953879, -0.7119302128881431 -0.2769907877532175, -0.7183414299371048 -0.2742575768732942, -0.7244530018430814 -0.2709075269332031, -0.7302057585361845 -0.2669730719273624, -0.735544003868055 -0.2624923038526021, -0.740416054842202 -0.2575086039149714, -0.7447747419904307 -0.2520702225283001, -0.7485778660508898 -0…
2	131550000	135540000	2:131550000-135530000	218	-0.666535	-0.167151	-0.666761	0.0819584	1	0.508313	POLYGON ((-0.6806136367995534 -0.1246812001622265, -0.6770936125647202 -0.1222761867584538, -0.6728099029598666 -0.1230748138157826, -0.632616871215262 -0.1661241781619007, -0.6400444178518203 -0.1946154805476661, -0.6484006821642029 -0.202576263055845, -0.678646803208222 -0.1880388376003636, -0.6901450949391847 -0.1436870540377191, -0.6806136367995534 -0.1246812001622265))
2	131550000	135540000	2:131550000-135530000	219	-0.629268	-0.132357	-1.6307	0.0364593	1	0.280011	POLYGON ((-0.6728099029598666 -0.1230748138157826, -0.6240586359926745 -0.1009899082459147, -0.5991373747025388 -0.1118169929790717, -0.6120435466703407 -0.1557816031296692, -0.632616871215262 -0.1661241781619007, -0.6728099029598666 -0.1230748138157826))
2	131550000	135540000	2:131550000-135530000	220	-0.58489	-0.145384	-3.45161	0.051819	2	-0.287229	POLYGON ((-0.5991373747025388 -0.1118169929790717, -0.5933930499228796 -0.1101833491777298, -0.555548930072462 -0.1686801347004748, -0.5577033795952135 -0.1822818399714647, -0.6120435466703407 -0.1557816031296692, -0.5991373747025388 -0.1118169929790717))
2	131550000	135540000	2:131550000-135530000	221	-0.603517	-0.183579	-3.45161	0.0807984	2	-0.225967	POLYGON ((-0.632616871215262 -0.1661241781619007, -0.6120435466703407 -0.1557816031296692, -0.5577033795952135 -0.1822818399714647, -0.5545467829709044 -0.1916514009841633, -0.5676812815130509 -0.2139580385881522, -0.6400444178518203 -0.1946154805476661, -0.632616871215262 -0.1661241781619007))
2	131550000	135540000	2:131550000-135530000	222	-0.613895	-0.222405	-3.45161	0.444251	2	-0.0219918	POLYGON ((-0.6484006821642029 -0.202576263055845, -0.6400444178518203 -0.1946154805476661, -0.5676812815130509 -0.2139580385881522, -0.5691066235243827 -0.2297210615321663, -0.5973931771940824 -0.2570685439424581, -0.5999698081462581 -0.2568512516775605, -0.6513566455886801 -0.2208947582780382, -0.6484006821642029 -0.202576263055845))
2	131550000	135540000	2:131550000-135530000	223	-0.637102	-0.255571	-3.45161	0.329153	3	0.0888592	POLYGON ((-0.6907172065270593 -0.3054814685676386, -0.6995346059302781 -0.2890275823319433, -0.7025688908946286 -0.2826128387393761, -0.7037077311016195 -0.2794097323639589, -0.7037407829072819 -0.2794028217346514, -0.6513566455886801 -0.2208947582780382, -0.5999698081462581 -0.2568512516775605, -0.6907172065270593 -0.3054814685676386))
2	131550000	135540000	2:131550000-135530000	224	-0.619467	-0.288479	-3.45161	0.111318	3	0.24164	POLYGON ((-0.6708551431513428 -0.3371541395241486, -0.6708424117651061 -0.3371165325644216, -0.6738767314989638 -0.3338304181099568, -0.678190233330811 -0.3280865575175939, -0.6818998071238405 -0.3219353548033339, -0.6907172065270593 -0.3054814685676386, -0.5999698081462581 -0.2568512516775605, -0.5973931771940824 -0.2570685439424581, -0.5898143223661786 -0.288029383716863, -0.6242369791975961 -0…
2	131550000	135540000	2:131550000-135530000	225	-0.563306	-0.274731	-3.45161	0.338733	3	0.0678275	POLYGON ((-0.5639816440892418 -0.3024754744825599, -0.5898143223661786 -0.288029383716863, -0.5973931771940824 -0.2570685439424581, -0.5691066235243827 -0.2297210615321663, -0.5411533611361176 -0.2547641042190031, -0.5476039079304715 -0.2896437809060088, -0.5639816440892418 -0.3024754744825599))
2	131550000	135540000	2:131550000-135530000	226	-0.587266	-0.317576	-3.45161	0.0802784	3	0.250001	POLYGON ((-0.584126110688468 -0.3419797348613935, -0.6242369791975961 -0.3261239462074819, -0.5898143223661786 -0.288029383716863, -0.5639816440892418 -0.3024754744825599, -0.5596024878728582 -0.326674100202771, -0.584126110688468 -0.3419797348613935))
2	131550000	135540000	2:131550000-135530000	227	-0.603103	-0.35764	-3.45161	0.0728385	3	0.316118	POLYGON ((-0.6057350213337591 -0.4293706350615854, -0.6058152669410588 -0.4283934351121209, -0.6063951481709603 -0.4283954821170381, -0.6134452189771272 -0.4277129619335346, -0.6203918756008053 -0.4263297432503301, -0.6271656543061193 -0.4242596576906749, -0.6336988200659394 -0.4215234052667252, -0.6399260438845554 -0.4181483473878557, -0.6457850560610151 -0.4141682332577138, -0.6512172688607629 …
2	131550000	135540000	2:131550000-135530000	228	-0.563584	-0.355522	-1.09513	0.134157	4	-0.29405	POLYGON ((-0.5285692099169595 -0.3572723548834376, -0.5812597927800414 -0.3954547087921051, -0.584126110688468 -0.3419797348613935, -0.5596024878728582 -0.326674100202771, -0.5327569667897066 -0.3419050757546098, -0.5281889842878854 -0.3523923294190373, -0.5285692099169595 -0.3572723548834376))
2	131550000	135540000	2:131550000-135530000	229	-0.536882	-0.308458	-3.45161	0.099798	3	0.204824	POLYGON ((-0.5327569667897066 -0.3419050757546098, -0.5596024878728582 -0.326674100202771, -0.5639816440892418 -0.3024754744825599, -0.5476039079304715 -0.2896437809060088, -0.5101102942803295 -0.3024643179906901, -0.5327569667897066 -0.3419050757546098))
2	131550000	135540000	2:131550000-135530000	230	-0.491075	-0.265723	-1.14118	0.148057	4	-0.231032	POLYGON ((-0.4601918925022707 -0.2853693621109548, -0.4851731280964808 -0.2990840439224769, -0.4994612902915266 -0.2966491225225612, -0.5165569963512322 -0.2566410187465996, -0.4962970700534108 -0.2378263752161457, -0.4488084813871575 -0.2551532167012415, -0.4601918925022707 -0.2853693621109548))
2	131550000	135540000	2:131550000-135530000	231	-0.474337	-0.219847	-1.70625	0.0765785	4	-0.175686	POLYGON ((-0.4488084813871575 -0.2551532167012415, -0.4962970700534108 -0.2378263752161457, -0.5058463784545003 -0.1937872414434841, -0.4956517004102508 -0.1864718670346841, -0.4439940123604025 -0.1894339725743651, -0.4462312860315207 -0.2533304048713242, -0.4488084813871575 -0.2551532167012415))
2	131550000	135540000	2:131550000-135530000	232	-0.523732	-0.230558	-3.45161	0.291074	3	0.0880738	POLYGON ((-0.5411533611361176 -0.2547641042190031, -0.5691066235243827 -0.2297210615321663, -0.5676812815130509 -0.2139580385881522, -0.5545467829709044 -0.1916514009841633, -0.5058463784545003 -0.1937872414434841, -0.4962970700534108 -0.2378263752161457, -0.5165569963512322 -0.2566410187465996, -0.5411533611361176 -0.2547641042190031))
2	131550000	135540000	2:131550000-135530000	233	-0.527607	-0.281333	-3.45161	0.153657	3	0.157705	POLYGON ((-0.5476039079304715 -0.2896437809060088, -0.5411533611361176 -0.2547641042190031, -0.5165569963512322 -0.2566410187465996, -0.4994612902915266 -0.2966491225225612, -0.5101102942803295 -0.3024643179906901, -0.5476039079304715 -0.2896437809060088))
2	131550000	135540000	2:131550000-135530000	234	-0.501792	-0.328607	-3.45161	0.311954	3	0.0766101	POLYGON ((-0.4798811863457345 -0.3322608039097557, -0.4843964614185653 -0.3414504576469148, -0.5281889842878854 -0.3523923294190373, -0.5327569667897066 -0.3419050757546098, -0.5101102942803295 -0.3024643179906901, -0.4994612902915266 -0.2966491225225612, -0.4851731280964808 -0.2990840439224769, -0.4798811863457345 -0.3322608039097557))
2	131550000	135540000	2:131550000-135530000	235	-0.4636	-0.347372	-3.45161	0.426651	3	0.031118	POLYGON ((-0.435019939091746 -0.3411191617560365, -0.4662131662144188 -0.3817188907120989, -0.4843964614185653 -0.3414504576469148, -0.4798811863457345 -0.3322608039097557, -0.4361116424892168 -0.3381291627311568, -0.435019939091746 -0.3411191617560365))
2	131550000	135540000	2:131550000-135530000	236	-0.433699	-0.370346	-1.48324	0.164677	4	-0.164142	POLYGON ((-0.4644912303333475 -0.4119884421578775, -0.4705518300531254 -0.409477316864048, -0.4662131662144188 -0.3817188907120989, -0.435019939091746 -0.3411191617560365, -0.3867384215287963 -0.368790545137484, -0.3825391303839334 -0.3746830307647656, -0.3854248517245982 -0.3788568496605586, -0.441960499008276 -0.4111263486389649, -0.4644912303333475 -0.4119884421578775))
2	131550000	135540000	2:131550000-135530000	237	-0.409134	-0.327486	-3.45161	0.273515	3	0.0962097	POLYGON ((-0.3911601831652627 -0.3015225982196235, -0.3867384215287963 -0.368790545137484, -0.435019939091746 -0.3411191617560365, -0.4361116424892168 -0.3381291627311568, -0.4337477784471174 -0.3162378468199742, -0.3940882050448099 -0.3000615730321443, -0.3911601831652627 -0.3015225982196235))
2	131550000	135540000	2:131550000-135530000	238	-0.369942	-0.324909	-0.588985	0.0299594	4	-0.586819	POLYGON ((-0.3911601831652627 -0.3015225982196235, -0.3453335480049713 -0.2918339272155485, -0.3528728436122541 -0.3717416939891611, -0.3825391303839334 -0.3746830307647656, -0.3867384215287963 -0.368790545137484, -0.3911601831652627 -0.3015225982196235))
2	131550000	135540000	2:131550000-135530000	239	-0.327346	-0.328928	-3.45161	0.0150397	3	0.360407	POLYGON ((-0.3528728436122541 -0.3717416939891611, -0.3453335480049713 -0.2918339272155485, -0.3429369449151056 -0.2895835684930445, -0.2668185610077872 -0.3432955002373131, -0.2692679382860222 -0.3662889278360975, -0.3152356032055719 -0.3852571037909066, -0.3528728436122541 -0.3717416939891611))
2	131550000	135540000	2:131550000-135530000	240	-0.300642	-0.291085	-3.45161	0.0712386	3	0.245511	POLYGON ((-0.2668185610077872 -0.3432955002373131, -0.3429369449151056 -0.2895835684930445, -0.3401672211124787 -0.2781592896173509, -0.3380962685790281 -0.2765101573510034, -0.2876285334791061 -0.2605708302790206, -0.2388723090091635 -0.2905933349132398, -0.2668185610077872 -0.3432955002373131))
2	131550000	135540000	2:131550000-135530000	241	-0.315808	-0.243067	-3.45161	0.0262395	3	0.315976	POLYGON ((-0.3380962685790281 -0.2765101573510034, -0.3261227989667285 -0.2232837353731902, -0.291826225905803 -0.234072425428463, -0.2876285334791061 -0.2605708302790206, -0.3380962685790281 -0.2765101573510034))
2	131550000	135540000	2:131550000-135530000	242	-0.365189	-0.228678	-3.45161	0.343113	3	0.0653651	POLYGON ((-0.3928608410315239 -0.2427626928322511, -0.3881788493866501 -0.207791060528877, -0.3651491089529718 -0.1937279875878204, -0.3418404635530657 -0.1980630195106233, -0.3416650572351189 -0.1987201207115994, -0.3626478283829356 -0.2540623593208763, -0.3928608410315239 -0.2427626928322511))
2	131550000	135540000	2:131550000-135530000	243	-0.415853	-0.221895	-3.45161	0.377112	3	0.0526452	POLYGON ((-0.3881788493866501 -0.207791060528877, -0.3928608410315239 -0.2427626928322511, -0.413554151102043 -0.2571944619790247, -0.4462312860315207 -0.2533304048713242, -0.4439940123604025 -0.1894339725743651, -0.4389308604112316 -0.1852384655570758, -0.3881788493866501 -0.207791060528877))
2	131550000	135540000	2:131550000-135530000	244	-0.396258	-0.1778	-3.45161	0.165097	2	-0.163208	POLYGON ((-0.3651491089529718 -0.1937279875878204, -0.3881788493866501 -0.207791060528877, -0.4389308604112316 -0.1852384655570758, -0.4319351765137316 -0.1616306131345781, -0.4126046689872298 -0.1459249635715386, -0.3834991458250518 -0.1457761774048819, -0.3651491089529718 -0.1937279875878204))
2	131550000	135540000	2:131550000-135530000	245	-0.352621	-0.161101	-3.45161	0.375452	2	-0.0521694	POLYGON ((-0.351708184359351 -0.1235998057360249, -0.3205858649116028 -0.1790978761797686, -0.3418404635530657 -0.1980630195106233, -0.3651491089529718 -0.1937279875878204, -0.3834991458250518 -0.1457761774048819, -0.3604709939876708 -0.1243341374197369, -0.351708184359351 -0.1235998057360249))
2	131550000	135540000	2:131550000-135530000	246	-0.319235	-0.142378	-3.45161	0.271735	2	-0.103222	POLYGON ((-0.2908195949667549 -0.1296082467913406, -0.2875814829468988 -0.1340049400461782, -0.2865549540139559 -0.1728815892024311, -0.3205858649116028 -0.1790978761797686, -0.351708184359351 -0.1235998057360249, -0.337866945942737 -0.1137386557702251, -0.2908195949667549 -0.1296082467913406))
2	131550000	135540000	2:131550000-135530000	247	-0.305694	-0.102236	-2.0285	0.00337993	1	0.245001	POLYGON ((-0.2814198607013589 -0.04669651790405505, -0.2908195949667549 -0.1296082467913406, -0.337866945942737 -0.1137386557702251, -0.3212918720285426 -0.05675747411411845, -0.3071197511209912 -0.04225359423379463, -0.2814198607013589 -0.04669651790405505))
2	131550000	135540000	2:131550000-135530000	248	-0.270195	-0.106261	-1.14427	0.0766185	1	0.38513	POLYGON ((-0.2875814829468988 -0.1340049400461782, -0.2908195949667549 -0.1296082467913406, -0.2814198607013589 -0.04669651790405505, -0.2614327474641157 -0.04412463912261715, -0.2153286218767095 -0.08985480607980353, -0.2286493692029236 -0.108908764030698, -0.2875814829468988 -0.1340049400461782))
2	131550000	135540000	2:131550000-135530000	249	-0.25553	-0.140696	-3.45161	0.359573	3	0.0683305	POLYGON ((-0.2875814829468988 -0.1340049400461782, -0.2286493692029236 -0.108908764030698, -0.23695680529118 -0.1662465503182505, -0.251234304237209 -0.1796180959118689, -0.2694432163708092 -0.1849116828950095, -0.2865549540139559 -0.1728815892024311, -0.2875814829468988 -0.1340049400461782))
2	131550000	135540000	2:131550000-135530000	250	-0.211895	-0.147018	-3.45161	0.194056	3	0.156547	POLYGON ((-0.1448567335842096 -0.1202731602206902, -0.1465705955225109 -0.119813830949121, -0.1457544394925035 -0.1216702743858356, -0.143620849632889 -0.1281574001533873, -0.1421218810104989 -0.1348198396076843, -0.1412714667514264 -0.1415956644284017, -0.1410775115769085 -0.1484218923621408, -0.1411002812682453 -0.1495706377084698, -0.1402839525865848 -0.1493608173212459, -0.1575357736068595 -0…
2	131550000	135540000	2:131550000-135530000	251	-0.212677	-0.186453	-1.17453	0.0726185	4	-0.378613	POLYGON ((-0.251234304237209 -0.1796180959118689, -0.23695680529118 -0.1662465503182505, -0.1575357736068595 -0.1678207829215724, -0.1686054557993632 -0.1935776971080708, -0.1926774925874284 -0.2236885436100469, -0.251234304237209 -0.1796180959118689))
2	131550000	135540000	2:131550000-135530000	252	-0.233994	-0.214777	-3.45161	0.0765985	3	0.24584	POLYGON ((-0.251234304237209 -0.1796180959118689, -0.1926774925874284 -0.2236885436100469, -0.1959947612977468 -0.2371468372392209, -0.2206449860067397 -0.2714941106566537, -0.2696738650718492 -0.1941385507848147, -0.2694432163708092 -0.1849116828950095, -0.251234304237209 -0.1796180959118689))
2	131550000	135540000	2:131550000-135530000	253	-0.266239	-0.235214	-3.45161	0.0697786	3	0.245511	POLYGON ((-0.2876285334791061 -0.2605708302790206, -0.291826225905803 -0.234072425428463, -0.2696738650718492 -0.1941385507848147, -0.2206449860067397 -0.2714941106566537, -0.2237214785730333 -0.2818514098551291, -0.2388723090091635 -0.2905933349132398, -0.2876285334791061 -0.2605708302790206))
2	131550000	135540000	2:131550000-135530000	254	-0.30634	-0.212969	-1.35142	0.163257	4	-0.211206	POLYGON ((-0.3205858649116028 -0.1790978761797686, -0.2865549540139559 -0.1728815892024311, -0.2694432163708092 -0.1849116828950095, -0.2696738650718492 -0.1941385507848147, -0.291826225905803 -0.234072425428463, -0.3261227989667285 -0.2232837353731902, -0.3416650572351189 -0.1987201207115994, -0.3418404635530657 -0.1980630195106233, -0.3205858649116028 -0.1790978761797686))
2	131550000	135540000	2:131550000-135530000	255	-0.343915	-0.236744	-3.45161	0.102558	3	0.213842	POLYGON ((-0.3626478283829356 -0.2540623593208763, -0.3416650572351189 -0.1987201207115994, -0.3261227989667285 -0.2232837353731902, -0.3380962685790281 -0.2765101573510034, -0.3401672211124787 -0.2781592896173509, -0.3626478283829356 -0.2540623593208763))
2	131550000	135540000	2:131550000-135530000	256	-0.381223	-0.271549	-3.45161	0.139657	3	0.178918	POLYGON ((-0.3453335480049713 -0.2918339272155485, -0.3911601831652627 -0.3015225982196235, -0.3940882050448099 -0.3000615730321443, -0.413554151102043 -0.2571944619790247, -0.3928608410315239 -0.2427626928322511, -0.3626478283829356 -0.2540623593208763, -0.3401672211124787 -0.2781592896173509, -0.3429369449151056 -0.2895835684930445, -0.3453335480049713 -0.2918339272155485))
2	131550000	135540000	2:131550000-135530000	257	-0.424023	-0.290984	-3.45161	0.115658	3	0.181932	POLYGON ((-0.413554151102043 -0.2571944619790247, -0.3940882050448099 -0.3000615730321443, -0.4337477784471174 -0.3162378468199742, -0.4601918925022707 -0.2853693621109548, -0.4488084813871575 -0.2551532167012415, -0.4462312860315207 -0.2533304048713242, -0.413554151102043 -0.2571944619790247))
2	131550000	135540000	2:131550000-135530000	258	-0.460195	-0.321972	-1.33643	0.245315	4	-0.135944	POLYGON ((-0.4337477784471174 -0.3162378468199742, -0.4361116424892168 -0.3381291627311568, -0.4798811863457345 -0.3322608039097557, -0.4851731280964808 -0.2990840439224769, -0.4601918925022707 -0.2853693621109548, -0.4337477784471174 -0.3162378468199742))
2	131550000	135540000	2:131550000-135530000	259	-0.493706	-0.360966	-1.08538	0.230635	4	-0.185162	POLYGON ((-0.4867679553101188 -0.4128924835104895, -0.4928401915702906 -0.4095789645308831, -0.5285692099169595 -0.3572723548834376, -0.5281889842878854 -0.3523923294190373, -0.4843964614185653 -0.3414504576469148, -0.4662131662144188 -0.3817188907120989, -0.4705518300531254 -0.409477316864048, -0.4867679553101188 -0.4128924835104895))
2	131550000	135540000	2:131550000-135530000	260	-0.537808	-0.391091	-3.45161	0.299914	3	0.0923037	POLYGON ((-0.4928401915702906 -0.4095789645308831, -0.5926965600382734 -0.4177789597671107, -0.5812597927800414 -0.3954547087921051, -0.5285692099169595 -0.3572723548834376, -0.4928401915702906 -0.4095789645308831))
2	131550000	135540000	2:131550000-135530000	261	-0.53419	-0.435155	-3.45161	0.185116	3	0.180101	POLYGON ((-0.5806935492533565 -0.4927030950975479, -0.5927312746960611 -0.4750303487548627, -0.5965278144484442 -0.4687871141847005, -0.5996609620055096 -0.4621859719823883, -0.6020973748398165 -0.4552971705996862, -0.6038111249794758 -0.4481940197179781, -0.6047839749300771 -0.440952110096676, -0.6057350213337591 -0.4293706350615854, -0.5926965600382734 -0.4177789597671107, -0.4928401915702906 -…
2	131550000	135540000	2:131550000-135530000	262	-0.510114	-0.470501	-3.45161	0.281514	3	0.140949	POLYGON ((-0.5489332290109199 -0.5297280771750783, -0.5492420764289971 -0.5295442876249793, -0.5547707980464318 -0.5254818551662312, -0.5598805591516782 -0.5209035954911703, -0.5645234206434282 -0.5158524612251461, -0.5686558238106519 -0.5103758414402332, -0.5806935492533565 -0.4927030950975479, -0.4971190526670295 -0.4357766375786882, -0.4858488988410584 -0.494396992393236, -0.4869991339809349 -…
2	131550000	135540000	2:131550000-135530000	263	-0.472174	-0.463206	-0.998418	0.0737585	4	-0.387445	POLYGON ((-0.4971190526670295 -0.4357766375786882, -0.4867679553101188 -0.4128924835104895, -0.4705518300531254 -0.409477316864048, -0.4644912303333475 -0.4119884421578775, -0.4456862864334792 -0.4768588321824233, -0.4858488988410584 -0.494396992393236, -0.4971190526670295 -0.4357766375786882))
2	131550000	135540000	2:131550000-135530000	264	-0.430607	-0.451157	-3.45161	0.0675386	3	0.224275	POLYGON ((-0.4456862864334792 -0.4768588321824233, -0.4644912303333475 -0.4119884421578775, -0.441960499008276 -0.4111263486389649, -0.4021178553319364 -0.4533166837607321, -0.4149830286514452 -0.4847280991103561, -0.4256379966188395 -0.485359100096741, -0.4456862864334792 -0.4768588321824233))
2	131550000	135540000	2:131550000-135530000	265	-0.402645	-0.424751	-1.86637	0.0917382	4	-0.146976	POLYGON ((-0.441960499008276 -0.4111263486389649, -0.3854248517245982 -0.3788568496605586, -0.3797760960098295 -0.4426963936697362, -0.4021178553319364 -0.4533166837607321, -0.441960499008276 -0.4111263486389649))
2	131550000	135540000	2:131550000-135530000	266	-0.360413	-0.421014	-3.45161	0.0269195	3	0.307529	POLYGON ((-0.3825391303839334 -0.3746830307647656, -0.3528728436122541 -0.3717416939891611, -0.3152356032055719 -0.3852571037909066, -0.321817981609601 -0.424747694362189, -0.353302266777374 -0.4530701503085789, -0.3797760960098295 -0.4426963936697362, -0.3854248517245982 -0.3788568496605586, -0.3825391303839334 -0.3746830307647656))
2	131550000	135540000	2:131550000-135530000	267	-0.380299	-0.471761	-3.45161	0.0369993	3	0.293345	POLYGON ((-0.4021178553319364 -0.4533166837607321, -0.3797760960098295 -0.4426963936697362, -0.353302266777374 -0.4530701503085789, -0.3508597091023302 -0.4703005785932447, -0.3834926742161582 -0.5053298262516122, -0.3933137298575975 -0.5055371405480723, -0.4149830286514452 -0.4847280991103561, -0.4021178553319364 -0.4533166837607321))
2	131550000	135540000	2:131550000-135530000	268	-0.426535	-0.519909	-3.45161	0.0262595	3	0.34888	POLYGON ((-0.4034501214263695 -0.5311949604846904, -0.4496269178318962 -0.5390362961354491, -0.4507823525301127 -0.5329430376998945, -0.4256379966188395 -0.485359100096741, -0.4149830286514452 -0.4847280991103561, -0.3933137298575975 -0.5055371405480723, -0.4034501214263695 -0.5311949604846904))
2	131550000	135540000	2:131550000-135530000	269	-0.478118	-0.52969	-3.45161	0.0432391	3	0.41138	POLYGON ((-0.4709725442541802 -0.6001246948315683, -0.4717998812471677 -0.6002399001912819, -0.4787388355229265 -0.600519524811482, -0.4856718218086438 -0.6001183047579576, -0.4925321967172172 -0.599040096761739, -0.4992540148389984 -0.5972952651059659, -0.5057726626425797 -0.5949005819991314, -0.5120254795728909 -0.5918790663520915, -0.5179523603762949 -0.5882597625085968, -0.5234963328628272 -0…
2	131550000	135540000	2:131550000-135530000	270	-0.453676	-0.505567	-3.45161	0.0578988	3	0.277715	POLYGON ((-0.4858488988410584 -0.494396992393236, -0.4456862864334792 -0.4768588321824233, -0.4256379966188395 -0.485359100096741, -0.4507823525301127 -0.5329430376998945, -0.4869991339809349 -0.4962482485135662, -0.4858488988410584 -0.494396992393236))
2	131550000	135540000	2:131550000-135530000	271	-0.421516	-0.549469	-3.45161	0.0119798	3	0.452791	POLYGON ((-0.3829039392444153 -0.6127887412641462, -0.4042192624807792 -0.6181561664563349, -0.4110767427662303 -0.6195269631822103, -0.4180359740840055 -0.6202148723293492, -0.425029121922708 -0.6202131885622407, -0.4319880211725571 -0.6195219282932608, -0.4388448405589596 -0.6181478295226931, -0.4455327438220507 -0.6161042861606487, -0.4519865411974146 -0.6134112174710741, -0.4581433248477309 -…
2	131550000	135540000	2:131550000-135530000	272	-0.378885	-0.538734	-3.45161	0.00149997	3	0.577024	POLYGON ((-0.3578174035677846 -0.6090513844507683, -0.3692162284597298 -0.609342030047317, -0.3829039392444153 -0.6127887412641462, -0.4034501214263695 -0.5311949604846904, -0.3933137298575975 -0.5055371405480723, -0.3834926742161582 -0.5053298262516122, -0.3600220398236123 -0.5225877912326846, -0.3578174035677846 -0.6090513844507683))
2	131550000	135540000	2:131550000-135530000	273	-0.340361	-0.537752	-3.45161	0.00253995	3	0.577024	POLYGON ((-0.3429911799625077 -0.6086733475351065, -0.3578174035677846 -0.6090513844507683, -0.3600220398236123 -0.5225877912326846, -0.3305819503870704 -0.5149351020933417, -0.3156830257681121 -0.5306078737658775, -0.3429911799625077 -0.6086733475351065))
2	131550000	135540000	2:131550000-135530000	274	-0.350234	-0.499769	-3.45161	0.00447991	3	0.432663	POLYGON ((-0.3600220398236123 -0.5225877912326846, -0.3834926742161582 -0.5053298262516122, -0.3508597091023302 -0.4703005785932447, -0.3266314174706306 -0.4890558518076857, -0.3305819503870704 -0.5149351020933417, -0.3600220398236123 -0.5225877912326846))
2	131550000	135540000	2:131550000-135530000	275	-0.322175	-0.463522	-3.45161	0.0047999	3	0.391352	POLYGON ((-0.353302266777374 -0.4530701503085789, -0.321817981609601 -0.424747694362189, -0.2862606572589942 -0.4702002280776173, -0.2899173580474118 -0.4762966694276232, -0.3266314174706306 -0.4890558518076857, -0.3508597091023302 -0.4703005785932447, -0.353302266777374 -0.4530701503085789))
2	131550000	135540000	2:131550000-135530000	276	-0.284098	-0.433735	-3.45161	0.00921982	3	0.40809	POLYGON ((-0.3152356032055719 -0.3852571037909066, -0.2692679382860222 -0.3662889278360975, -0.2583652985422113 -0.3757346597410698, -0.2512624839344975 -0.3879546849821726, -0.2499071934718908 -0.4051718232591787, -0.2759960539430658 -0.4669412207184051, -0.2862606572589942 -0.4702002280776173, -0.321817981609601 -0.424747694362189, -0.3152356032055719 -0.3852571037909066))
2	131550000	135540000	2:131550000-135530000	277	-0.246543	-0.449596	-3.45161	1.99996e-05	3	0.577024	POLYGON ((-0.2499071934718908 -0.4051718232591787, -0.2213144186887583 -0.4514155024137039, -0.240757444540238 -0.479070944691457, -0.2759960539430658 -0.4669412207184051, -0.2499071934718908 -0.4051718232591787))
2	131550000	135540000	2:131550000-135530000	278	-0.263459	-0.49874	-3.45161	1.99996e-05	3	0.577024	POLYGON ((-0.2862606572589942 -0.4702002280776173, -0.2759960539430658 -0.4669412207184051, -0.240757444540238 -0.479070944691457, -0.2357634172265665 -0.4898832694089597, -0.2436216548223716 -0.5101545350191466, -0.2825265071974333 -0.5190257151278964, -0.2899173580474118 -0.4762966694276232, -0.2862606572589942 -0.4702002280776173))
2	131550000	135540000	2:131550000-135530000	279	-0.3073	-0.506323	-3.45161	0.000259995	3	0.523505	POLYGON ((-0.3266314174706306 -0.4890558518076857, -0.2899173580474118 -0.4762966694276232, -0.2825265071974333 -0.5190257151278964, -0.2858013710588161 -0.526341679627039, -0.3156830257681121 -0.5306078737658775, -0.3305819503870704 -0.5149351020933417, -0.3266314174706306 -0.4890558518076857))
2	131550000	135540000	2:131550000-135530000	280	-0.300839	-0.551577	-3.45161	0.00245995	3	0.577024	POLYGON ((-0.2465719984861181 -0.6034376562169798, -0.2687166941884918 -0.6147057217716587, -0.2751784478759041 -0.6175968026477912, -0.2818965083812841 -0.6198284550389974, -0.2888037737899407 -0.6213783885612815, -0.2958312523543554 -0.6222311220341884, -0.3029087516035396 -0.6223781381112747, -0.309965579445562 -0.6218179683538064, -0.3169312502604334 -0.6205562078979465, -0.3237361889306908 -…
2	131550000	135540000	2:131550000-135530000	281	-0.25655	-0.52904	-3.45161	0.00451991	3	0.577024	POLYGON ((-0.2128681806843376 -0.5879368874883424, -0.227402158109023 -0.5936833104835821, -0.2465719984861181 -0.6034376562169798, -0.2858013710588161 -0.526341679627039, -0.2825265071974333 -0.5190257151278964, -0.2436216548223716 -0.5101545350191466, -0.2128681806843376 -0.5879368874883424))
2	131550000	135540000	2:131550000-135530000	282	-0.221274	-0.515093	-3.45161	0.0138997	3	0.51547	POLYGON ((-0.1474805673556439 -0.5121091798005303, -0.1525854106323872 -0.5323859695776652, -0.1545299045454188 -0.5388078814143339, -0.1570733344418819 -0.5450169854219618, -0.1601928764867561 -0.5509575633101833, -0.1638605370195629 -0.5565763064464953, -0.1680434037595165 -0.5618227942289602, -0.1727039411486213 -0.5666499465427492, -0.1778003271824165 -0.5710144462403436, -0.1832868287057644 …
2	131550000	135540000	2:131550000-135530000	283	-0.211064	-0.47454	-3.45161	0.00525989	3	0.526662	POLYGON ((-0.1403628652065608 -0.4777307683452257, -0.1404238650222089 -0.4797446120389684, -0.141138110266369 -0.4858307561785498, -0.1423757240789007 -0.4918323900233954, -0.1474805673556439 -0.5121091798005303, -0.2357634172265665 -0.4898832694089597, -0.240757444540238 -0.479070944691457, -0.2213144186887583 -0.4514155024137039, -0.1811984250330891 -0.4508943934517153, -0.1403628652065608 -0.…
2	131550000	135540000	2:131550000-135530000	284	-0.211668	-0.428033	-3.45161	0.00189996	3	0.487768	POLYGON ((-0.2512624839344975 -0.3879546849821726, -0.196133360524976 -0.4076742122138689, -0.1811984250330891 -0.4508943934517153, -0.2213144186887583 -0.4514155024137039, -0.2499071934718908 -0.4051718232591787, -0.2512624839344975 -0.3879546849821726))
2	131550000	135540000	2:131550000-135530000	285	-0.171343	-0.414099	-3.45161	0.00889982	3	0.465454	POLYGON ((-0.1005599072050942 -0.4161711068492733, -0.1006019849577086 -0.416178877393, -0.1006048508711313 -0.4177304281541183, -0.101309119140149 -0.4246972716522853, -0.1026978385891936 -0.4315605332977817, -0.1047574371479431 -0.4382531378654739, -0.1074677861889096 -0.4447096779759998, -0.1108023972461854 -0.4508670533275105, -0.1147286808894159 -0.4566650873801527, -0.1192082652230054 -0.46…
2	131550000	135540000	2:131550000-135530000	286	-0.195231	-0.382081	-3.45161	0.00939981	3	0.441373	POLYGON ((-0.2512624839344975 -0.3879546849821726, -0.2583652985422113 -0.3757346597410698, -0.1824546208632925 -0.3579469865794276, -0.1567878094966227 -0.3783186636169311, -0.196133360524976 -0.4076742122138689, -0.2512624839344975 -0.3879546849821726))
2	131550000	135540000	2:131550000-135530000	287	-0.204623	-0.342001	-3.45161	0.00387992	3	0.45833	POLYGON ((-0.2692679382860222 -0.3662889278360975, -0.2668185610077872 -0.3432955002373131, -0.2388723090091635 -0.2905933349132398, -0.2237214785730333 -0.2818514098551291, -0.1849823846524776 -0.3032477048352109, -0.1824546208632925 -0.3579469865794276, -0.2583652985422113 -0.3757346597410698, -0.2692679382860222 -0.3662889278360975))
2	131550000	135540000	2:131550000-135530000	288	-0.161851	-0.340025	-1.24846	0.00361993	4	-0.631768	POLYGON ((-0.1567878094966227 -0.3783186636169311, -0.1824546208632925 -0.3579469865794276, -0.1849823846524776 -0.3032477048352109, -0.1452837652392542 -0.3028252857106477, -0.135354513170753 -0.3195677692663151, -0.1447992642033445 -0.3798549369059189, -0.1567878094966227 -0.3783186636169311))
2	131550000	135540000	2:131550000-135530000	289	-0.116383	-0.347148	-3.45161	0.0442191	3	0.350533	POLYGON ((-0.05496814451408131 -0.3822746724903132, -0.05496976013700743 -0.3822734856284842, -0.05664682267507436 -0.3852093028106779, -0.06059527061632577 -0.390792054123943, -0.06506363749387026 -0.3959680613513528, -0.07001028023864879 -0.4006890865499792, -0.07538909847639118 -0.4049111319945315, -0.08114996416133288 -0.4085948502153781, -0.08723918874592791 -0.4117059106983805, -0.093600023…
2	131550000	135540000	2:131550000-135530000	290	-0.104696	-0.306128	-3.45161	0.00949981	3	0.407155	POLYGON ((-0.06375707471694279 -0.3399674926358862, -0.135354513170753 -0.3195677692663151, -0.1452837652392542 -0.3028252857106477, -0.1282582584474448 -0.2782494893631877, -0.1071922880502568 -0.2785696347378743, -0.06315829621568034 -0.2949874281095795, -0.05860493829286167 -0.3155970700987664, -0.06375707471694279 -0.3399674926358862))
2	131550000	135540000	2:131550000-135530000	291	-0.0872632	-0.259372	-2.10425	0.0156397	4	-0.180555	POLYGON ((-0.06315829621568034 -0.2949874281095795, -0.1071922880502568 -0.2785696347378743, -0.08510918671610182 -0.2342662007950659, -0.07656675922316254 -0.2332522356458819, -0.05708073594319324 -0.2806718791573916, -0.06315829621568034 -0.2949874281095795))
2	131550000	135540000	2:131550000-135530000	292	-0.0930806	-0.210362	-3.45161	0.0315194	3	0.364499	POLYGON ((-0.1307264648999757 -0.1469042629794169, -0.1107132931184005 -0.1417602915042897, -0.1037589941021985 -0.1403400197011166, -0.09669746815424635 -0.139622873908384, -0.08959962338920936 -0.139616055325447, -0.0825367326161357 -0.140319632420915, -0.07557971765454397 -0.1417265402451256, -0.06879843717496255 -0.1438226513726387, -0.06226098521504972 -0.1465869177623827, -0.056033007415225…
2	131550000	135540000	2:131550000-135530000	293	-0.133107	-0.22065	-3.45161	0.0212796	3	0.37968	POLYGON ((-0.1402839525865848 -0.1493608173212459, -0.1307264648999757 -0.1469042629794169, -0.1099621484496182 -0.2276900593348904, -0.128831828678359 -0.2458147623402915, -0.1686054557993632 -0.1935776971080708, -0.1575357736068595 -0.1678207829215724, -0.1402839525865848 -0.1493608173212459))
2	131550000	135540000	2:131550000-135530000	294	-0.162639	-0.265987	-2.52965	0.0175596	3	0.0107073	POLYGON ((-0.2206449860067397 -0.2714941106566537, -0.1959947612977468 -0.2371468372392209, -0.1331820467067909 -0.258809075751829, -0.1282582584474448 -0.2782494893631877, -0.1452837652392542 -0.3028252857106477, -0.1849823846524776 -0.3032477048352109, -0.2237214785730333 -0.2818514098551291, -0.2206449860067397 -0.2714941106566537))
2	131550000	135540000	2:131550000-135530000	295	-0.151952	-0.234999	-3.45161	0.051339	3	0.30358	POLYGON ((-0.1926774925874284 -0.2236885436100469, -0.1686054557993632 -0.1935776971080708, -0.128831828678359 -0.2458147623402915, -0.1331820467067909 -0.258809075751829, -0.1959947612977468 -0.2371468372392209, -0.1926774925874284 -0.2236885436100469))
2	131550000	135540000	2:131550000-135530000	296	-0.10386	-0.251099	-3.45161	0.051219	3	0.30358	POLYGON ((-0.1331820467067909 -0.258809075751829, -0.128831828678359 -0.2458147623402915, -0.1099621484496182 -0.2276900593348904, -0.08510918671610182 -0.2342662007950659, -0.1071922880502568 -0.2785696347378743, -0.1282582584474448 -0.2782494893631877, -0.1331820467067909 -0.258809075751829))
2	131550000	135540000	2:131550000-135530000	297	-0.0505954	-0.244304	-3.45161	0.00925981	3	0.462103	POLYGON ((-0.02986634610920955 -0.1747973043833063, -0.02048184960682926 -0.1754824348461487, -0.02663086509933895 -0.2597078743969365, -0.05708073594319324 -0.2806718791573916, -0.07656675922316254 -0.2332522356458819, -0.02986634610920955 -0.1747973043833063))
2	131550000	135540000	2:131550000-135530000	298	-0.000683246	-0.247948	-3.45161	0.00951981	3	0.495145	POLYGON ((-0.02048184960682926 -0.1754824348461487, 0.004474215202442802 -0.1773043930331613, 0.01138719088335723 -0.178152417123583, 0.01818346310363192 -0.1796752636459786, 0.02479732185824744 -0.1818582089033879, 0.03116482081340815 -0.1846801470102353, 0.0372243955739951 -0.1881137939553517, 0.04291745892115822 -0.1921259513984286, 0.04818896726497155 -0.1966778276493779, 0.05298795283538335 …
2	131550000	135540000	2:131550000-135530000	299	-0.0207932	-0.287591	-3.45161	0.00577988	3	0.502589	POLYGON ((0.00656767374313617 -0.3015891606179893, -0.05860493829286167 -0.3155970700987664, -0.06315829621568034 -0.2949874281095795, -0.05708073594319324 -0.2806718791573916, -0.02663086509933895 -0.2597078743969365, 0.01913713005748055 -0.2829247061924589, 0.00656767374313617 -0.3015891606179893))
2	131550000	135540000	2:131550000-135530000	300	-0.0126253	-0.325593	-3.45161	0.0185196	3	0.411053	POLYGON ((0.01510144431499669 -0.3941692389117704, -0.006123785561067031 -0.3961257207536041, -0.01296640843078044 -0.3964239109792198, -0.01980584187891418 -0.3960598295922645, -0.02657813697337433 -0.3950368807659155, -0.03321997252792522 -0.3933646291060026, -0.03966924715740419 -0.3910587102216234, -0.04586565992775535 -0.3881406845316736, -0.05175127417178513 -0.3846378356742075, -0.05496814…
2	131550000	135540000	2:131550000-135530000	301	0.0298252	-0.32168	-3.45161	0.0169397	3	0.421986	POLYGON ((0.02280984644112009 -0.3934587001389338, 0.01510144431499669 -0.3941692389117704, 0.00656767374313617 -0.3015891606179893, 0.01913713005748055 -0.2829247061924589, 0.04842774164152513 -0.2708049821514827, 0.05427949706591409 -0.3781597007732843, 0.02280984644112009 -0.3934587001389338))
2	131550000	135540000	2:131550000-135530000	302	0.0724499	-0.319357	-3.45161	0.050579	3	0.352974	POLYGON ((0.1073331254996908 -0.3489955179614013, 0.0544565036530394 -0.3781422349164379, 0.05427949706591409 -0.3781597007732843, 0.04842774164152513 -0.2708049821514827, 0.05692358534058449 -0.2621039405522212, 0.1135487823978404 -0.3367142378291244, 0.1073331254996908 -0.3489955179614013))
2	131550000	135540000	2:131550000-135530000	303	0.107888	-0.292461	-3.45161	0.153497	3	0.268955	POLYGON ((0.06862739775926113 -0.2335570528346491, 0.0686309082471193 -0.2335775100787815, 0.07029406700457649 -0.2324290412889849, 0.07582372689553754 -0.2293022691978905, 0.08161128771341045 -0.2266834942937087, 0.08761019894812502 -0.224593779907156, 0.109972032068071 -0.217912291011232, 0.1375063821261404 -0.3100651854716776, 0.1316187253464925 -0.3248677799633858, 0.1135487823978404 -0.33671…
2	131550000	135540000	2:131550000-135530000	304	0.152612	-0.279098	-3.45161	0.410152	3	0.0841135	POLYGON ((0.109972032068071 -0.217912291011232, 0.132333865188017 -0.211230802115308, 0.1392755786731014 -0.2095329396148799, 0.1463530439737433 -0.2085431880816294, 0.1534942186125629 -0.208271622330397, 0.1606264116062025 -0.2087210066657268, 0.1676770233966867 -0.2098867667436359, 0.1745742848521508 -0.2117570361344808, 0.1812479878145494 -0.2143127771129517, 0.1876301997580012 -0.217527974445…
2	131550000	135540000	2:131550000-135530000	305	0.171125	-0.317613	-1.3653	0.0388792	4	-0.511728	POLYGON ((0.2257081482069268 -0.2676698315968754, 0.2349645043956774 -0.2869272947078477, 0.2376507855696015 -0.2932940783757042, 0.2397038845058043 -0.2998923225040179, 0.2411042602486043 -0.3066592264192247, 0.2418385843217917 -0.3135303841800536, 0.2418998675862086 -0.3204403975794737, 0.2412875267608778 -0.3273234985908128, 0.2400073899745458 -0.3341141753337407, 0.23957735678039 -0.335587856…
2	131550000	135540000	2:131550000-135530000	306	0.151873	-0.359553	-1.48234	0.00729985	4	-0.506222	POLYGON ((0.1533149011703223 -0.3993989187101211, 0.1073331254996908 -0.3489955179614013, 0.1135487823978404 -0.3367142378291244, 0.1316187253464925 -0.3248677799633858, 0.1975544915746838 -0.3551330003253954, 0.1716451525022982 -0.3923094945808554, 0.1533149011703223 -0.3993989187101211))
2	131550000	135540000	2:131550000-135530000	307	0.113769	-0.394315	-3.45161	0.0792984	3	0.290934	POLYGON ((0.1371252474094286 -0.4291496471602322, 0.1250088791777882 -0.4342251430236618, 0.0544565036530394 -0.3781422349164379, 0.1073331254996908 -0.3489955179614013, 0.1533149011703223 -0.3993989187101211, 0.1371252474094286 -0.4291496471602322))
2	131550000	135540000	2:131550000-135530000	308	0.0835922	-0.432277	-3.45161	0.166717	3	0.209946	POLYGON ((0.01521471836526119 -0.4016601768536031, 0.02290736094969101 -0.3934497115264924, 0.02280984644112009 -0.3934587001389338, 0.05427949706591409 -0.3781597007732843, 0.0544565036530394 -0.3781422349164379, 0.1250088791777882 -0.4342251430236618, 0.1016609031806435 -0.472352140719855, 0.09366948643267345 -0.4751669107282506, 0.01521471836526119 -0.4016601768536031))
2	131550000	135540000	2:131550000-135530000	309	0.0502153	-0.467901	-3.45161	0.105238	3	0.285367	POLYGON ((-0.01956853349188498 -0.4400391378047316, -0.003029102458888905 -0.4211874213271702, -0.001473721836385986 -0.4194719831523275, 0.01521471836526119 -0.4016601768536031, 0.09366948643267345 -0.4751669107282506, 0.06657363583755758 -0.5111846013396577, 0.06286921935396506 -0.5123653649327502, -0.01956853349188498 -0.4400391378047316))
2	131550000	135540000	2:131550000-135530000	310	0.0171365	-0.505605	-0.236826	0.0745585	4	-0.897172	POLYGON ((-0.0367667917262053 -0.4540325751959071, -0.02755054780875096 -0.4491370729465872, -0.01956853349188498 -0.4400391378047316, 0.06286921935396506 -0.5123653649327502, 0.03438333536875599 -0.5469607990024613, 0.01567004057918034 -0.5527498491696293, -0.0367667917262053 -0.4540325751959071))
2	131550000	135540000	2:131550000-135530000	311	-0.0242145	-0.527569	-3.45161	0.109598	3	0.298403	POLYGON ((-0.09469689679630484 -0.5066195396958276, -0.08420210963662503 -0.4899047558133584, -0.079951736588064 -0.4838601495013581, -0.07509475964186293 -0.478291243732441, -0.069684038660173 -0.4732586464927142, -0.06377846005905063 -0.4688171289699555, -0.05744229593083554 -0.4650150294631926, -0.0367667917262053 -0.4540325751959071, 0.01567004057918034 -0.5527498491696293, 0.0104483352429752…
2	131550000	135540000	2:131550000-135530000	312	-0.0452041	-0.560999	-2.54	0.172937	3	0.0118977	POLYGON ((-0.1184220120959118 -0.5774809149971882, -0.1155642912927237 -0.552839250293261, -0.1145599549969034 -0.546614861953211, -0.1130060995633962 -0.5405044417635176, -0.1109150364737676 -0.5345564037039517, -0.1083033336043631 -0.5288178751708872, -0.1051916839559847 -0.523334323578297, -0.09469689679630484 -0.5066195396958276, -0.005171268246424651 -0.5628304021020692, -0.02964610289509685…
2	131550000	135540000	2:131550000-135530000	313	-0.0509195	-0.610282	-3.45161	0.0219196	3	0.507776	POLYGON ((-0.1079441279623689 -0.652266699166753, -0.1078950258258336 -0.6522604011111288, -0.1108487034417407 -0.6480398900588551, -0.1142176841065137 -0.6420704249538806, -0.1169938896720126 -0.6358032703349792, -0.1191513214985771 -0.6292971169189545, -0.1206697756454948 -0.6226128936011088, -0.1215350320770821 -0.6158131968676713, -0.1217389878306266 -0.6089617045915523, -0.1212797328990999 -…
2	131550000	135540000	2:131550000-135530000	314	-0.00257702	-0.602821	-3.45161	0.0580788	3	0.307266	POLYGON ((0.005538646321986342 -0.6732389078856983, 0.001384535824261925 -0.6738800614252333, -0.01765734970346652 -0.6654529206728383, -0.02964610289509685 -0.5877763542701964, -0.005171268246424651 -0.5628304021020692, 0.01044833524297523 -0.5583392118589483, 0.03418730533160665 -0.6495749679614071, 0.005538646321986342 -0.6732389078856983))
2	131550000	135540000	2:131550000-135530000	315	0.0435019	-0.590832	-3.45161	0.104398	3	0.241609	POLYGON ((0.03418730533160665 -0.6495749679614071, 0.01044833524297523 -0.5583392118589483, 0.01567004057918034 -0.5527498491696293, 0.03438333536875599 -0.5469607990024613, 0.09048883480803595 -0.6029020094143823, 0.09076969259585377 -0.6114114847335054, 0.0881757067067525 -0.6171635414235644, 0.05682810039608232 -0.6430989761011963, 0.03418730533160665 -0.6495749679614071))
2	131550000	135540000	2:131550000-135530000	316	0.0782807	-0.555951	-3.45161	0.0947781	3	0.25722	POLYGON ((0.1173183932871751 -0.5537309134235345, 0.09048883480803595 -0.6029020094143823, 0.03438333536875599 -0.5469607990024613, 0.06286921935396506 -0.5123653649327502, 0.06657363583755758 -0.5111846013396577, 0.1173183932871751 -0.5537309134235345))
2	131550000	135540000	2:131550000-135530000	317	0.112695	-0.514904	-1.38706	0.0165197	4	-0.501123	POLYGON ((0.09366948643267345 -0.4751669107282506, 0.1016609031806435 -0.472352140719855, 0.1580164442781305 -0.5138223766939867, 0.1577963244555551 -0.5158566542738365, 0.1324257309853962 -0.5487786773562258, 0.1173183932871751 -0.5537309134235345, 0.06657363583755758 -0.5111846013396577, 0.09366948643267345 -0.4751669107282506))
2	131550000	135540000	2:131550000-135530000	318	0.145569	-0.470231	-3.45161	0.0344593	3	0.31791	POLYGON ((0.1250088791777882 -0.4342251430236618, 0.1371252474094286 -0.4291496471602322, 0.1860515695704294 -0.4697219524454523, 0.1844847704247678 -0.4863095576093811, 0.1580164442781305 -0.5138223766939867, 0.1016609031806435 -0.472352140719855, 0.1250088791777882 -0.4342251430236618))
2	131550000	135540000	2:131550000-135530000	319	0.179059	-0.429845	-3.45161	0.0546989	3	0.311369	POLYGON ((0.1371252474094286 -0.4291496471602322, 0.1533149011703223 -0.3993989187101211, 0.1716451525022982 -0.3923094945808554, 0.2098973318510282 -0.4303548497246984, 0.2109297311451306 -0.445514816754396, 0.1860515695704294 -0.4697219524454523, 0.1371252474094286 -0.4291496471602322))
2	131550000	135540000	2:131550000-135530000	320	0.20922	-0.39952	-3.45161	0.118818	3	0.241244	POLYGON ((0.23957735678039 -0.3355878567794575, 0.2395697343865741 -0.3356139779731028, 0.2431781852886825 -0.3373590511413908, 0.24916075199008 -0.3410231442330586, 0.2547515139060982 -0.3452610757709054, 0.2703321106462821 -0.3583354726267799, 0.2098973318510282 -0.4303548497246984, 0.1716451525022982 -0.3923094945808554, 0.1975544915746838 -0.3551330003253954, 0.23957735678039 -0.3355878567794…
2	131550000	135540000	2:131550000-135530000	321	0.240381	-0.425669	-3.45161	0.198396	3	0.171706	POLYGON ((0.2703321106462821 -0.3583354726267799, 0.2775882885640615 -0.3644244659648337, 0.2776515736803339 -0.3642295497360993, 0.2816414434698974 -0.3726940848877546, 0.2908830842019436 -0.4319710631443096, 0.2578669955096705 -0.4587128638771708, 0.2109297311451306 -0.445514816754396, 0.2098973318510282 -0.4303548497246984, 0.2703321106462821 -0.3583354726267799))
2	131550000	135540000	2:131550000-135530000	322	0.225723	-0.477802	-3.45161	0.0315394	3	0.314192	POLYGON ((0.2109297311451306 -0.445514816754396, 0.2578669955096705 -0.4587128638771708, 0.2560682489038786 -0.4811426502134687, 0.222855405349146 -0.5057240915572653, 0.1844847704247678 -0.4863095576093811, 0.1860515695704294 -0.4697219524454523, 0.2109297311451306 -0.445514816754396))
2	131550000	135540000	2:131550000-135530000	323	0.202057	-0.524574	-3.45161	0.00235995	3	0.469213	POLYGON ((0.1844847704247678 -0.4863095576093811, 0.222855405349146 -0.5057240915572653, 0.2306449694845868 -0.5337548197486836, 0.2081266666527946 -0.5621133795596495, 0.1577963244555551 -0.5158566542738365, 0.1580164442781305 -0.5138223766939867, 0.1844847704247678 -0.4863095576093811))
2	131550000	135540000	2:131550000-135530000	324	0.170209	-0.559226	-3.45161	0.0147797	3	0.38316	POLYGON ((0.183984155896921 -0.6095494570347878, 0.1324257309853962 -0.5487786773562258, 0.1577963244555551 -0.5158566542738365, 0.2081266666527946 -0.5621133795596495, 0.2080730842973782 -0.5760054997961075, 0.1848574847765091 -0.609935711684233, 0.183984155896921 -0.6095494570347878))
2	131550000	135540000	2:131550000-135530000	325	0.136578	-0.58776	-3.45161	0.0151397	3	0.38316	POLYGON ((0.09048883480803595 -0.6029020094143823, 0.1173183932871751 -0.5537309134235345, 0.1324257309853962 -0.5487786773562258, 0.183984155896921 -0.6095494570347878, 0.09076969259585377 -0.6114114847335054, 0.09048883480803595 -0.6029020094143823))
2	131550000	135540000	2:131550000-135530000	326	0.137486	-0.633215	-3.45161	0.0614388	3	0.251123	POLYGON ((0.09076969259585377 -0.6114114847335054, 0.183984155896921 -0.6095494570347878, 0.1848574847765091 -0.609935711684233, 0.1854865529198373 -0.6121814290197379, 0.1460168126347649 -0.6682969391701911, 0.1414590875263225 -0.6688978328344437, 0.0881757067067525 -0.6171635414235644, 0.09076969259585377 -0.6114114847335054))
2	131550000	135540000	2:131550000-135530000	327	0.105675	-0.665979	-1.36334	0.0348593	4	-0.392609	POLYGON ((0.09948217454117057 -0.6917171848107013, 0.05682810039608232 -0.6430989761011963, 0.0881757067067525 -0.6171635414235644, 0.1414590875263225 -0.6688978328344437, 0.1159057983518774 -0.6963019669574597, 0.09948217454117057 -0.6917171848107013))
2	131550000	135540000	2:131550000-135530000	328	0.0731566	-0.694508	-3.45161	0.0373193	3	0.303228	POLYGON ((0.004241391984948816 -0.6783009064056944, 0.004257906329801787 -0.6783229315798488, 0.004548605312179876 -0.6768983201023465, 0.005692767758067038 -0.6732151204817967, 0.005538646321986342 -0.6732389078856983, 0.03418730533160665 -0.6495749679614071, 0.05682810039608232 -0.6430989761011963, 0.09948217454117057 -0.6917171848107013, 0.06393617797504027 -0.7206992359218598, 0.0067378326899…
2	131550000	135540000	2:131550000-135530000	329	0.0817102	-0.751738	-2.55586	0.126517	3	0.0102089	POLYGON ((0.05978225030177958 -0.7684151217857271, 0.06932732343523966 -0.7295118190401491, 0.107389404694922 -0.7401635124050596, 0.1059508877448454 -0.7726486876121504, 0.09124952985970977 -0.788756450540259, 0.05978225030177958 -0.7684151217857271))
2	131550000	135540000	2:131550000-135530000	330	0.131945	-0.753962	-1.13878	0.351633	4	-0.0968966	POLYGON ((0.1059508877448454 -0.7726486876121504, 0.107389404694922 -0.7401635124050596, 0.122175664094465 -0.7239887373755084, 0.1471219962472049 -0.7314993877691913, 0.1450417759103909 -0.7754778672972995, 0.1059508877448454 -0.7726486876121504))
2	131550000	135540000	2:131550000-135530000	331	0.170915	-0.792819	-1.04278	0.231015	4	-0.207337	POLYGON ((0.2012090062082098 -0.8047841807909814, 0.1871584584706378 -0.8374876699180704, 0.151071281568688 -0.8166364393411941, 0.1492057700171019 -0.7787519043723332, 0.1839308934259018 -0.7687535303214892, 0.2012090062082098 -0.8047841807909814))
2	131550000	135540000	2:131550000-135530000	332	0.210845	-0.773671	-3.45161	0.318274	3	0.089341	POLYGON ((0.2458446563834771 -0.7769585790263629, 0.241156144910212 -0.7870629772393115, 0.2012090062082098 -0.8047841807909814, 0.1839308934259018 -0.7687535303214892, 0.1901287946637729 -0.7516421317651379, 0.2330232361341075 -0.7478619991642781, 0.2458446563834771 -0.7769585790263629))
2	131550000	135540000	2:131550000-135530000	333	0.230741	-0.818522	-0.944757	0.410552	4	-0.104753	POLYGON ((0.2783736525772981 -0.8753064905658896, 0.258267350343714 -0.8837865071623026, 0.2518155858062613 -0.8861460485037397, 0.2451655914464807 -0.8878694973725978, 0.2383799191053071 -0.8889406424920441, 0.2315223968514511 -0.8893494083499043, 0.2246575285954462 -0.8890919499719518, 0.2178498873465246 -0.8881706890888882, 0.2111635078195306 -0.8865942913568174, 0.2046612841051919 -0.88437758…
2	131550000	135540000	2:131550000-135530000	334	0.270954	-0.801562	-3.45161	0.391972	2	-0.063265	POLYGON ((0.3422245183019628 -0.8140171715894748, 0.3405391309286842 -0.8144081179076644, 0.340181282316339 -0.8165527847695443, 0.338429018366639 -0.8231087174252669, 0.3360574233926154 -0.8294668790475422, 0.333088265496668 -0.8355689101294625, 0.3295487976177802 -0.8413588021034211, 0.3254715073856159 -0.8467834114256199, 0.3208938189270854 -0.8517929473634513, 0.3158577493624016 -0.8563414290…
2	131550000	135540000	2:131550000-135530000	335	0.267036	-0.74891	-1.29755	0.232275	4	-0.187586	POLYGON ((0.2897581342855711 -0.7736909737228175, 0.2458446563834771 -0.7769585790263629, 0.2330232361341075 -0.7478619991642781, 0.2378709474510908 -0.7349025780673732, 0.2891128210443202 -0.7220705303842125, 0.2897581342855711 -0.7736909737228175))
2	131550000	135540000	2:131550000-135530000	336	0.311853	-0.74835	-3.45161	0.48455	3	0.0165307	POLYGON ((0.3474679004843756 -0.8128009046400627, 0.3422245183019628 -0.8140171715894748, 0.2897581342855711 -0.7736909737228175, 0.2891128210443202 -0.7220705303842125, 0.2953319015080089 -0.7134431302013733, 0.3232173539676563 -0.7082556947410351, 0.3474679004843756 -0.8128009046400627))
2	131550000	135540000	2:131550000-135530000	337	0.351072	-0.739253	-3.45161	0.339593	2	-0.100534	POLYGON ((0.3937002066420703 -0.8004132520414652, 0.3714285650609012 -0.807096024714241, 0.3670769742092936 -0.8082523389527856, 0.3474679004843756 -0.8128009046400627, 0.3232173539676563 -0.7082556947410351, 0.3438567744349819 -0.6912890490349849, 0.3643628798008118 -0.7026408961120337, 0.3937002066420703 -0.8004132520414652))
2	131550000	135540000	2:131550000-135530000	338	0.395615	-0.725887	-1.98418	0.47911	4	-0.0147369	POLYGON ((0.4420692959736421 -0.7793563197632041, 0.4420498661167051 -0.7792979116351172, 0.4409936116312571 -0.7802737206280347, 0.4352809649085597 -0.7845704412148921, 0.4291643464019267 -0.7882695111553208, 0.4227060497178919 -0.7913332579335085, 0.4159718482232395 -0.7937304793686892, 0.3937002066420703 -0.8004132520414652, 0.3643628798008118 -0.7026408961120337, 0.437845330436144 -0.69272314…
2	131550000	135540000	2:131550000-135530000	339	0.388334	-0.671941	-0.925014	0.0887182	4	-0.464618	POLYGON ((0.4268702839396368 -0.6448881881046761, 0.4413680154900967 -0.6768385266543145, 0.437845330436144 -0.6927231403524722, 0.3643628798008118 -0.7026408961120337, 0.3438567744349819 -0.6912890490349849, 0.3425012080875999 -0.6504091439566672, 0.34393543611356 -0.6480411720652537, 0.4268702839396368 -0.6448881881046761))
2	131550000	135540000	2:131550000-135530000	340	0.386391	-0.620839	-0.679982	0.386452	4	-0.137906	POLYGON ((0.4268702839396368 -0.6448881881046761, 0.34393543611356 -0.6480411720652537, 0.3445842798941373 -0.5971932985690425, 0.3641593115142219 -0.571999630790254, 0.3749834084863182 -0.5734475270655506, 0.429773313974732 -0.6254306741346902, 0.4268702839396368 -0.6448881881046761))
2	131550000	135540000	2:131550000-135530000	341	0.422909	-0.58235	-3.45161	0.425111	2	-0.036277	POLYGON ((0.4422159772479705 -0.6133889382655194, 0.429773313974732 -0.6254306741346902, 0.3749834084863182 -0.5734475270655506, 0.4159960438538539 -0.5540150675644253, 0.4283307940834409 -0.5570281720281338, 0.4422159772479705 -0.6133889382655194))
2	131550000	135540000	2:131550000-135530000	342	0.435194	-0.532059	-0.914233	0.472831	4	-0.0548015	POLYGON ((0.4776326131778771 -0.4696273055751977, 0.4928155544272614 -0.4908656153532488, 0.4964838298034123 -0.4965528258544939, 0.4995925979707607 -0.5025641624781101, 0.5021134795064133 -0.5088447487408687, 0.5040234617058794 -0.5153372502247707, 0.505305108662189 -0.521982397973326, 0.5059467204353612 -0.5287195295479113, 0.5059424398591921 -0.5354871428049921, 0.5054730167738155 -0.540351035…
2	131550000	135540000	2:131550000-135530000	343	0.404828	-0.489582	-3.45161	0.331633	3	0.099836	POLYGON ((0.4647044308087265 -0.4441725771075574, 0.4689363086338389 -0.4574626790514636, 0.4776326131778771 -0.4696273055751977, 0.417503517873038 -0.5126126716863694, 0.3756955279231722 -0.5061269821738587, 0.3721562450348778 -0.4736420737889062, 0.4647044308087265 -0.4441725771075574))
2	131550000	135540000	2:131550000-135530000	344	0.389596	-0.441746	-2.43792	0.349113	4	-0.00688091	POLYGON ((0.4641914567245146 -0.4290584890020066, 0.4625671826580618 -0.437460605029062, 0.4647044308087265 -0.4441725771075574, 0.3721562450348778 -0.4736420737889062, 0.3678838226242563 -0.4700427748035858, 0.3569426702000083 -0.4369446429716367, 0.3721697321159429 -0.4112691011441555, 0.4641914567245146 -0.4290584890020066))
2	131550000	135540000	2:131550000-135530000	345	0.399699	-0.389483	-3.45161	0.395972	2	-0.0606285	POLYGON ((0.3941175363611383 -0.3140501038188884, 0.4195860472609334 -0.3215004783121554, 0.4261736534778666 -0.3237851324860572, 0.4325047185836554 -0.3267064019001932, 0.4385178943849695 -0.3302359793743667, 0.4441549130444984 -0.3343396632067089, 0.4493611516978815 -0.338977688589102, 0.4540861617507521 -0.3441051129292532, 0.4582841577269909 -0.3496722513456378, 0.4619144609312369 -0.35562515…
2	131550000	135540000	2:131550000-135530000	346	0.348762	-0.374582	-1.92083	0.116118	4	-0.214499	POLYGON ((0.2776515736803339 -0.3642295497360993, 0.2813920990736843 -0.3527088455626523, 0.2838085497800029 -0.3463298767580462, 0.2868273975972822 -0.3402129302254767, 0.2904206448026808 -0.334414736407821, 0.2945549665168258 -0.3289890695372736, 0.2991920197689895 -0.3239862489165833, 0.3042887991015895 -0.3194526722423681, 0.3097980354160246 -0.3154303852986114, 0.3156686343608289 -0.31195669…
2	131550000	135540000	2:131550000-135530000	347	0.337069	-0.410595	-1.85486	0.052059	4	-0.231109	POLYGON ((0.3569426702000083 -0.4369446429716367, 0.2914195644851689 -0.4323469780438483, 0.2908830842019436 -0.4319710631443096, 0.2816414434698974 -0.3726940848877546, 0.368694067633253 -0.4009582036723782, 0.3721697321159429 -0.4112691011441555, 0.3569426702000083 -0.4369446429716367))
2	131550000	135540000	2:131550000-135530000	348	0.333584	-0.460261	-3.45161	0.0411792	3	0.321963	POLYGON ((0.3678838226242563 -0.4700427748035858, 0.3162939509805222 -0.4845227425613157, 0.2914195644851689 -0.4323469780438483, 0.3569426702000083 -0.4369446429716367, 0.3678838226242563 -0.4700427748035858))
2	131550000	135540000	2:131550000-135530000	349	0.332209	-0.513216	-3.45161	0.0846783	3	0.236917	POLYGON ((0.3151548951603204 -0.4893201384887811, 0.3650416351807684 -0.5230493382406086, 0.3571664758116582 -0.5528485266334555, 0.2913045445575898 -0.5249761350802873, 0.3151548951603204 -0.4893201384887811))
2	131550000	135540000	2:131550000-135530000	350	0.311341	-0.562526	-3.45161	0.0377592	3	0.310611	POLYGON ((0.3641593115142219 -0.571999630790254, 0.3445842798941373 -0.5971932985690425, 0.2775305554055016 -0.5864704018793223, 0.2797566734635469 -0.5381525157611787, 0.2907113291504497 -0.525160255272266, 0.2913045445575898 -0.5249761350802873, 0.3571664758116582 -0.5528485266334555, 0.3641593115142219 -0.571999630790254))
2	131550000	135540000	2:131550000-135530000	351	0.302188	-0.619764	-3.45161	0.173737	3	0.176011	POLYGON ((0.34393543611356 -0.6480411720652537, 0.3425012080875999 -0.6504091439566672, 0.2679140630506836 -0.6450116662091802, 0.2644257042882348 -0.6364562276321755, 0.2751562319775485 -0.5886822257850549, 0.2775305554055016 -0.5864704018793223, 0.3445842798941373 -0.5971932985690425, 0.34393543611356 -0.6480411720652537))
2	131550000	135540000	2:131550000-135530000	352	0.298196	-0.67493	-3.45161	0.347273	3	0.0793576	POLYGON ((0.3425012080875999 -0.6504091439566672, 0.3438567744349819 -0.6912890490349849, 0.3232173539676563 -0.7082556947410351, 0.2953319015080089 -0.7134431302013733, 0.2596291607365153 -0.6700141615140969, 0.2679140630506836 -0.6450116662091802, 0.3425012080875999 -0.6504091439566672))
2	131550000	135540000	2:131550000-135530000	353	0.256993	-0.708803	-3.45161	0.256635	3	0.120655	POLYGON ((0.2891128210443202 -0.7220705303842125, 0.2378709474510908 -0.7349025780673732, 0.2222888210637331 -0.6901658922801931, 0.2596291607365153 -0.6700141615140969, 0.2953319015080089 -0.7134431302013733, 0.2891128210443202 -0.7220705303842125))
2	131550000	135540000	2:131550000-135530000	354	0.206673	-0.72633	-1.03862	0.197416	4	-0.232823	POLYGON ((0.2378709474510908 -0.7349025780673732, 0.2330232361341075 -0.7478619991642781, 0.1901287946637729 -0.7516421317651379, 0.1733538244732315 -0.7246757336030553, 0.1823390787867176 -0.7001827384280476, 0.2131508898152625 -0.6878529280738601, 0.2222888210637331 -0.6901658922801931, 0.2378709474510908 -0.7349025780673732))
2	131550000	135540000	2:131550000-135530000	355	0.160111	-0.755295	-3.45161	0.471371	3	0.0143435	POLYGON ((0.1839308934259018 -0.7687535303214892, 0.1492057700171019 -0.7787519043723332, 0.1450417759103909 -0.7754778672972995, 0.1471219962472049 -0.7314993877691913, 0.1733538244732315 -0.7246757336030553, 0.1901287946637729 -0.7516421317651379, 0.1839308934259018 -0.7687535303214892))
2	131550000	135540000	2:131550000-135530000	356	0.128983	-0.794883	-3.45161	0.332793	3	0.0798274	POLYGON ((0.151071281568688 -0.8166364393411941, 0.09979564507901004 -0.8280970864245227, 0.09140379432888432 -0.8198964135168655, 0.09124952985970977 -0.788756450540259, 0.1059508877448454 -0.7726486876121504, 0.1450417759103909 -0.7754778672972995, 0.1492057700171019 -0.7787519043723332, 0.151071281568688 -0.8166364393411941))
2	131550000	135540000	2:131550000-135530000	357	0.140347	-0.845723	-3.45161	0.49371	3	0.00139469	POLYGON ((0.2007326572708617 -0.8825967955782555, 0.2007239096782406 -0.8825928304220545, 0.1992299907297372 -0.885092119469102, 0.1949535148023329 -0.8908369795185851, 0.190118776971555 -0.8961206310450827, 0.1743642969816683 -0.9116797224226812, 0.1014373934704225 -0.8378370143744143, 0.09979564507901004 -0.8280970864245227, 0.151071281568688 -0.8166364393411941, 0.1871584584706378 -0.837487669…
2	131550000	135540000	2:131550000-135530000	358	0.108838	-0.876842	-3.45161	0.423632	2	-0.037792	POLYGON ((0.1743642969816683 -0.9116797224226812, 0.1586098169917817 -0.9272388138002797, 0.1533122594538005 -0.9319701496487069, 0.1475674894374049 -0.9361471428540589, 0.1414332732797176 -0.9397277918049618, 0.1349712933801275 -0.9426760914091621, 0.1282465279550462 -0.9449623951414921, 0.1213265976516898 -0.9465637131534823, 0.114281085590989 -0.9474639434469927, 0.1071808376769119 -0.94765403…
2	131550000	135540000	2:131550000-135530000	359	0.0672632	-0.858042	-3.45161	0.227955	3	0.151325	POLYGON ((0.05886638655682231 -0.9319821051512416, 0.03999598297158524 -0.9234491898939409, 0.03140382760085304 -0.9201631052239683, 0.03327199940410448 -0.8764795637833753, 0.03661444601419392 -0.8677400383369707, 0.07227683271168509 -0.824065407841866, 0.09140379432888432 -0.8198964135168655, 0.09979564507901004 -0.8280970864245227, 0.1014373934704225 -0.8378370143744143, 0.05886638655682231 -0…
2	131550000	135540000	2:131550000-135530000	360	0.0202588	-0.840065	-1.12343	0.0145397	4	-0.558199	POLYGON ((0.02355105458013355 -0.8077211188373785, 0.03661444601419392 -0.8677400383369707, 0.03327199940410448 -0.8764795637833753, -0.003172901726876537 -0.8300761157674887, 0.007884013773693613 -0.7960711409749868, 0.02355105458013355 -0.8077211188373785))
2	131550000	135540000	2:131550000-135530000	361	-0.0279986	-0.824374	-3.45161	0.0303794	3	0.356277	POLYGON ((0.007884013773693613 -0.7960711409749868, -0.003172901726876537 -0.8300761157674887, -0.02059272680819741 -0.8464474777912048, -0.05708305674362933 -0.8285874828160136, -0.002656688357964399 -0.7886689450976303, 0.005170971787653252 -0.7884701036023697, 0.007884013773693613 -0.7960711409749868))
2	131550000	135540000	2:131550000-135530000	362	-0.0725602	-0.791351	-3.45161	0.0370193	3	0.364848	POLYGON ((-0.1135962903757766 -0.8495108272178636, -0.1136104585303654 -0.8490916599509496, -0.1146169694356588 -0.8483457692205375, -0.1312808658104457 -0.8361018551494019, -0.07036868636547275 -0.7532007305305718, -0.06753403417123809 -0.7539301338044566, -0.04989249884422113 -0.7742981406352534, -0.07076131883443232 -0.8290498178958393, -0.1135962903757766 -0.8495108272178636))
2	131550000	135540000	2:131550000-135530000	363	-0.106121	-0.766692	-3.45161	0.0321194	3	0.577024	POLYGON ((-0.1312808658104457 -0.8361018551494019, -0.1480613381025686 -0.8237722861100332, -0.1533821626297142 -0.8194512235695773, -0.1582604139076585 -0.8146360995217012, -0.1626504097762065 -0.8093720049745515, -0.1665110403205347 -0.8037082352999091, -0.1698061528431018 -0.797697828608942, -0.1725048904139261 -0.7913970690792487, -0.1745819808288893 -0.7848649598842591, -0.1760179732701326 -…
2	131550000	135540000	2:131550000-135530000	364	-0.0959243	-0.722052	-3.45161	0.0530189	3	0.577024	POLYGON ((-0.1700758777011773 -0.7285985852925658, -0.1649774428011357 -0.706278689828284, -0.1631141725627233 -0.6996320917445021, -0.1606127830344004 -0.6931984230790919, -0.157497030553644 -0.6870387860323701, -0.1537965062203566 -0.6812116802561349, -0.149546354862606 -0.6757724472674778, -0.1447869412571852 -0.6707727448562115, -0.1395634667749812 -0.6662600564776007, -0.1339255400919706 -0.…
2	131550000	135540000	2:131550000-135530000	365	-0.0538738	-0.718731	-3.45161	0.00665987	3	0.457336	POLYGON ((0.0009741593457172652 -0.6739433997336161, 0.004241391984948816 -0.6783009064056944, 0.006737832689928648 -0.6913926390921188, 0.003186569512912837 -0.7060182101422419, -0.06753403417123809 -0.7539301338044566, -0.07036868636547275 -0.7532007305305718, -0.07249016706511377 -0.7508896571144956, -0.07937119810569636 -0.6637717521359959, -0.01765734970346652 -0.6654529206728383, 0.00138453…
2	131550000	135540000	2:131550000-135530000	366	-0.0297788	-0.754296	-3.45161	0.00951981	3	0.395232	POLYGON ((0.003186569512912837 -0.7060182101422419, 0.01255374166005006 -0.7734457265698191, 0.005170971787653252 -0.7884701036023697, -0.002656688357964399 -0.7886689450976303, -0.04989249884422113 -0.7742981406352534, -0.06753403417123809 -0.7539301338044566, 0.003186569512912837 -0.7060182101422419))
2	131550000	135540000	2:131550000-135530000	367	-0.0443262	-0.802113	-3.45161	0.0303794	3	0.356277	POLYGON ((-0.04989249884422113 -0.7742981406352534, -0.002656688357964399 -0.7886689450976303, -0.05708305674362933 -0.8285874828160136, -0.07076131883443232 -0.8290498178958393, -0.04989249884422113 -0.7742981406352534))
2	131550000	135540000	2:131550000-135530000	368	-0.0425676	-0.85414	-3.45161	0.0782784	3	0.322413	POLYGON ((-0.0225295149750083 -0.9254845445777202, -0.04430279541264433 -0.9249509945154668, -0.05142198734015299 -0.9244166469737281, -0.05845122872403886 -0.9231683735408883, -0.06531911045415145 -0.9212188552575032, -0.07195586265118489 -0.9185878970154859, -0.0782940634494218 -0.9153022263628952, -0.08426932392632572 -0.911395221982399, -0.08982094222087497 -0.9069065746017627, -0.09489252019…
2	131550000	135540000	2:131550000-135530000	369	0.000978963	-0.855208	-3.45161	0.0771385	3	0.322413	POLYGON ((0.03140382760085304 -0.9201631052239683, 0.03012931598136972 -0.919675666052564, 0.02625552005597088 -0.9213758157166529, 0.0197045806220291 -0.923519299824935, 0.01297632064520992 -0.9250159124247632, 0.006134452775515954 -0.9258514814783312, -0.0007562345373722731 -0.9260180946399735, -0.0225295149750083 -0.9254845445777202, -0.02059272680819741 -0.8464474777912048, -0.003172901726876…
2	131550000	135540000	2:131550000-135530000	370	0.0399884	-0.835771	-3.45161	0.102818	3	0.226449	POLYGON ((0.03661444601419392 -0.8677400383369707, 0.02355105458013355 -0.8077211188373785, 0.07227683271168509 -0.824065407841866, 0.03661444601419392 -0.8677400383369707))
2	131550000	135540000	2:131550000-135530000	371	0.0535783	-0.795257	-1.59	0.0117798	4	-0.333407	POLYGON ((0.01255374166005006 -0.7734457265698191, 0.05978225030177958 -0.7684151217857271, 0.09124952985970977 -0.788756450540259, 0.09140379432888432 -0.8198964135168655, 0.07227683271168509 -0.824065407841866, 0.02355105458013355 -0.8077211188373785, 0.007884013773693613 -0.7960711409749868, 0.005170971787653252 -0.7884701036023697, 0.01255374166005006 -0.7734457265698191))
2	131550000	135540000	2:131550000-135530000	372	0.0480634	-0.743482	-3.45161	0.049099	3	0.273604	POLYGON ((0.006737832689928648 -0.6913926390921188, 0.06393617797504027 -0.7206992359218598, 0.06932732343523966 -0.7295118190401491, 0.05978225030177958 -0.7684151217857271, 0.01255374166005006 -0.7734457265698191, 0.003186569512912837 -0.7060182101422419, 0.006737832689928648 -0.6913926390921188))
2	131550000	135540000	2:131550000-135530000	373	0.0914479	-0.716942	-3.45161	0.202976	3	0.135436	POLYGON ((0.06932732343523966 -0.7295118190401491, 0.06393617797504027 -0.7206992359218598, 0.09948217454117057 -0.6917171848107013, 0.1159057983518774 -0.6963019669574597, 0.122175664094465 -0.7239887373755084, 0.107389404694922 -0.7401635124050596, 0.06932732343523966 -0.7295118190401491))
2	131550000	135540000	2:131550000-135530000	374	0.14687	-0.704391	-3.45161	0.296094	3	0.0945225	POLYGON ((0.1823390787867176 -0.7001827384280476, 0.1733538244732315 -0.7246757336030553, 0.1471219962472049 -0.7314993877691913, 0.122175664094465 -0.7239887373755084, 0.1159057983518774 -0.6963019669574597, 0.1414590875263225 -0.6688978328344437, 0.1460168126347649 -0.6682969391701911, 0.1823390787867176 -0.7001827384280476))
2	131550000	135540000	2:131550000-135530000	375	0.181917	-0.664467	-2.50019	0.0824984	4	-0.000442203	POLYGON ((0.1915298593914386 -0.6178436619761279, 0.2131508898152625 -0.6878529280738601, 0.1823390787867176 -0.7001827384280476, 0.1460168126347649 -0.6682969391701911, 0.1854865529198373 -0.6121814290197379, 0.1915298593914386 -0.6178436619761279))
2	131550000	135540000	2:131550000-135530000	376	0.225758	-0.650927	-3.45161	0.0195396	3	0.333731	POLYGON ((0.2222888210637331 -0.6901658922801931, 0.2131508898152625 -0.6878529280738601, 0.1915298593914386 -0.6178436619761279, 0.2644257042882348 -0.6364562276321755, 0.2679140630506836 -0.6450116662091802, 0.2596291607365153 -0.6700141615140969, 0.2222888210637331 -0.6901658922801931))
2	131550000	135540000	2:131550000-135530000	377	0.237429	-0.605219	-3.45161	0.00293994	3	0.456757	POLYGON ((0.1848574847765091 -0.609935711684233, 0.2080730842973782 -0.5760054997961075, 0.2751562319775485 -0.5886822257850549, 0.2644257042882348 -0.6364562276321755, 0.1915298593914386 -0.6178436619761279, 0.1854865529198373 -0.6121814290197379, 0.1848574847765091 -0.609935711684233))
2	131550000	135540000	2:131550000-135530000	378	0.246065	-0.559519	-3.45161	0.00223996	3	0.465995	POLYGON ((0.2797566734635469 -0.5381525157611787, 0.2775305554055016 -0.5864704018793223, 0.2751562319775485 -0.5886822257850549, 0.2080730842973782 -0.5760054997961075, 0.2081266666527946 -0.5621133795596495, 0.2306449694845868 -0.5337548197486836, 0.2797566734635469 -0.5381525157611787))
2	131550000	135540000	2:131550000-135530000	379	0.250397	-0.51114	-3.45161	0.00229995	3	0.450376	POLYGON ((0.2907113291504497 -0.525160255272266, 0.2797566734635469 -0.5381525157611787, 0.2306449694845868 -0.5337548197486836, 0.222855405349146 -0.5057240915572653, 0.2560682489038786 -0.4811426502134687, 0.2907113291504497 -0.525160255272266))
2	131550000	135540000	2:131550000-135530000	380	0.286559	-0.48268	-3.45161	0.00947981	3	0.37566	POLYGON ((0.2914195644851689 -0.4323469780438483, 0.3162939509805222 -0.4845227425613157, 0.3151548951603204 -0.4893201384887811, 0.2913045445575898 -0.5249761350802873, 0.2907113291504497 -0.525160255272266, 0.2560682489038786 -0.4811426502134687, 0.2578669955096705 -0.4587128638771708, 0.2908830842019436 -0.4319710631443096, 0.2914195644851689 -0.4323469780438483))
2	131550000	135540000	2:131550000-135530000	381	0.343684	-0.496244	-1.29704	0.049979	4	-0.373024	POLYGON ((0.3721562450348778 -0.4736420737889062, 0.3756955279231722 -0.5061269821738587, 0.3650416351807684 -0.5230493382406086, 0.3151548951603204 -0.4893201384887811, 0.3162939509805222 -0.4845227425613157, 0.3678838226242563 -0.4700427748035858, 0.3721562450348778 -0.4736420737889062))
2	131550000	135540000	2:131550000-135530000	382	0.398446	-0.530721	-3.45161	0.419052	3	0.0453158	POLYGON ((0.417503517873038 -0.5126126716863694, 0.4159960438538539 -0.5540150675644253, 0.3749834084863182 -0.5734475270655506, 0.3641593115142219 -0.571999630790254, 0.3571664758116582 -0.5528485266334555, 0.3650416351807684 -0.5230493382406086, 0.3756955279231722 -0.5061269821738587, 0.417503517873038 -0.5126126716863694))
2	131550000	135540000	2:131550000-135530000	383	0.444895	-0.576933	-1.33107	0.443751	4	-0.0591365	POLYGON ((0.5054730167738155 -0.5403510359220168, 0.5054721814055931 -0.5403596915290236, 0.5085478442081276 -0.5458613882586768, 0.5224035542625634 -0.5742458802801645, 0.4422159772479705 -0.6133889382655194, 0.4283307940834409 -0.5570281720281338, 0.5054730167738155 -0.5403510359220168))
2	131550000	135540000	2:131550000-135530000	384	0.472606	-0.633702	-3.45161	0.304594	2	-0.11718	POLYGON ((0.5224035542625634 -0.5742458802801645, 0.5362592643169991 -0.6026303723016523, 0.5384647300644716 -0.6076287438530023, 0.540278393609015 -0.6127822302336783, 0.54972532588498 -0.6433413294741126, 0.4413680154900967 -0.6768385266543145, 0.4268702839396368 -0.6448881881046761, 0.429773313974732 -0.6254306741346902, 0.4422159772479705 -0.6133889382655194, 0.5224035542625634 -0.57424588028…
2	131550000	135540000	2:131550000-135530000	385	0.4915	-0.69482	-3.45161	0.191536	2	-0.218655	POLYGON ((0.54972532588498 -0.6433413294741126, 0.5591722581609452 -0.673900428714547, 0.5596697066424947 -0.6755831761787895, 0.5680126108358071 -0.7051474101887798, 0.4524378977301903 -0.7377621147768947, 0.437845330436144 -0.6927231403524722, 0.4413680154900967 -0.6768385266543145, 0.54972532588498 -0.6433413294741126))
2	131550000	135540000	2:131550000-135530000	386	0.508186	-0.753949	-3.45161	0.238135	2	-0.240296	POLYGON ((0.5680126108358071 -0.7051474101887798, 0.5745768965683481 -0.7284088638754759, 0.5843068098962421 -0.7480753897414937, 0.4573333340619068 -0.8108948690550346, 0.4446993520986978 -0.7853585128001496, 0.4420772447508185 -0.7793802145966533, 0.4420692959736421 -0.7793563197632041, 0.4524378977301903 -0.7377621147768947, 0.5680126108358071 -0.7051474101887798))
2	131550000	135540000	2:131550000-135530000	387	0.533454	-0.805021	-0.604216	0.281134	1	0.331969	POLYGON ((0.5843068098962421 -0.7480753897414937, 0.584591302201691 -0.7486504180172088, 0.5880453788098766 -0.7612459610473808, 0.5876825365566297 -0.7639079675100944, 0.520195042735463 -0.8793210134519334, 0.497699486628996 -0.8661667925287289, 0.4919435382170135 -0.8624149933076856, 0.4865781679687267 -0.8581231706627919, 0.4816538593922901 -0.8533317069448391, 0.4772169459857983 -0.8480856856…
2	131550000	135540000	2:131550000-135530000	388	0.578445	-0.83133	-1.04167	0.0809584	1	0.893052	POLYGON ((0.6217254705331458 -0.8931789635154668, 0.5964833905885131 -0.899826351464341, 0.5896719559220527 -0.9012663045018057, 0.582752062506103 -0.9020306225491257, 0.5757905614176042 -0.902111921752025, 0.5688547056931149 -0.9015094167025587, 0.5620115006167939 -0.9002289280267098, 0.5553270564018447 -0.8982828261530161, 0.5488659495189806 -0.8956899118054588, 0.54269059884193 -0.892475234375…
2	131550000	135540000	2:131550000-135530000	389	0.628929	-0.818035	-1.21478	0.0713986	1	0.822848	POLYGON ((0.7037474404486954 -0.8311849437831369, 0.6895470575206258 -0.8546770438476458, 0.6857472990102833 -0.8603300163577917, 0.6814221357436354 -0.8655918815835673, 0.6766115631874944 -0.8704139822274246, 0.6713600654649223 -0.8747517275642566, 0.6657162040035299 -0.8785650057788637, 0.6597321684802974 -0.881818554886235, 0.6534632942154003 -0.8844822888046844, 0.6469675504777784 -0.88653157…
2	131550000	135540000	2:131550000-135530000	390	0.65733	-0.771051	-0.915755	0.0248595	1	1.18498	POLYGON ((0.584591302201691 -0.7486504180172088, 0.5861722409992958 -0.7518458805776563, 0.5879967177139815 -0.7488275965099752, 0.5889161279520048 -0.7368580780166064, 0.7254752111133871 -0.74734754083194, 0.7298041030130292 -0.7523873223568316, 0.7279538078247412 -0.7764757450853216, 0.7271399483878473 -0.7830393447722398, 0.725717433718383 -0.789498420561259, 0.7236986663772554 -0.795796657334…
2	131550000	135540000	2:131550000-135530000	391	0.66175	-0.713515	-3.45161	0.0191796	2	-0.67296	POLYGON ((0.5889161279520048 -0.7368580780166064, 0.5901324335104376 -0.7210233708606895, 0.5851124945620145 -0.7039261482323336, 0.7016108244485098 -0.6697209140644437, 0.7254752111133871 -0.74734754083194, 0.5889161279520048 -0.7368580780166064))
2	131550000	135540000	2:131550000-135530000	392	0.644401	-0.654428	-0.62951	0.228775	1	0.397298	POLYGON ((0.5851124945620145 -0.7039261482323336, 0.5769293935977878 -0.6760556302015025, 0.5673546477514272 -0.6485340245794707, 0.6864079720135712 -0.6071154628273225, 0.6917672850600253 -0.6138550794850824, 0.7029700009702089 -0.664365194115983, 0.7016108244485098 -0.6697209140644437, 0.5851124945620145 -0.7039261482323336))
2	131550000	135540000	2:131550000-135530000	393	0.624106	-0.596092	-3.45161	0.48837	3	0.00168466	POLYGON ((0.5673546477514272 -0.6485340245794707, 0.5572070501975411 -0.6193658166321758, 0.5551561986900969 -0.6123113945148237, 0.5538470599007647 -0.6050824928731058, 0.5532937166304911 -0.5977568751830671, 0.5535021213597877 -0.5904133453244654, 0.5544700322161021 -0.5831308998636608, 0.5561870370903175 -0.5759878782637153, 0.5586346656429516 -0.5690611201631537, 0.5617865879951717 -0.5624251…
2	131550000	135540000	2:131550000-135530000	394	0.648793	-0.550395	-1.76695	0.285694	4	-0.181187	POLYGON ((0.5741300156831106 -0.5395765749835467, 0.5842922341869237 -0.5207655847337278, 0.5914471958826568 -0.5020924740423639, 0.6806495947759124 -0.5362720897367071, 0.6929830819384474 -0.572061730280909, 0.685175150961973 -0.5995662360010008, 0.5741300156831106 -0.5395765749835467))
2	131550000	135540000	2:131550000-135530000	395	0.666387	-0.504478	-3.45161	0.182356	3	0.321084	POLYGON ((0.5914471958826568 -0.5020924740423639, 0.600244142193139 -0.479134090868967, 0.6030229785188211 -0.4728205853816663, 0.6064027527027955 -0.4668073159441267, 0.610351411135438 -0.4611513121034783, 0.6148315049373121 -0.4559062151177672, 0.619800545122472 -0.4511217692249417, 0.625211405561883 -0.4468433498709837, 0.631012769925278 -0.4431115333714438, 0.6371496183626704 -0.4399617120876…
2	131550000	135540000	2:131550000-135530000	396	0.714444	-0.527771	-3.45161	0.49979	3	0.0731397	POLYGON ((0.7213090598415781 -0.4523849558272076, 0.7453375052365765 -0.4640313632151891, 0.751630282455877 -0.4674856592407538, 0.7575411132348542 -0.4715591449307097, 0.7630092872120371 -0.476209981362927, 0.7679786405703322 -0.4813903996244557, 0.7723981328976655 -0.4870471914477971, 0.7762223714249418 -0.493122255714986, 0.7899838380865609 -0.5176592273699103, 0.6929830819384474 -0.5720617302…
2	131550000	135540000	2:131550000-135530000	397	0.741966	-0.576845	-3.45161	0.259615	2	-0.204647	POLYGON ((0.7899838380865609 -0.5176592273699103, 0.8037453047481801 -0.5421961990248347, 0.8071697821232873 -0.5491739565408111, 0.8098090841537755 -0.5564849229636754, 0.8116314284835751 -0.5640410599653471, 0.8165710220593001 -0.590917688386288, 0.6917672850600253 -0.6138550794850824, 0.6864079720135712 -0.6071154628273225, 0.685175150961973 -0.5995662360010008, 0.6929830819384474 -0.572061730…
2	131550000	135540000	2:131550000-135530000	398	0.751846	-0.630598	-1.81958	0.304014	1	0.103888	POLYGON ((0.8165710220593001 -0.590917688386288, 0.8215106156350251 -0.617794316807229, 0.8220060834609906 -0.6208689414984176, 0.825678081680002 -0.6473496299164694, 0.7029700009702089 -0.664365194115983, 0.6917672850600253 -0.6138550794850824, 0.8165710220593001 -0.590917688386288))
2	131550000	135540000	2:131550000-135530000	399	0.75919	-0.683559	-0.336855	0.215976	1	0.621456	POLYGON ((0.825678081680002 -0.6473496299164694, 0.8293500798990135 -0.6738303183345212, 0.8299658408934725 -0.6807540901740062, 0.8298999885144379 -0.6877048772914279, 0.8291531569563183 -0.6946157398071591, 0.8277325386152783 -0.7014201223373113, 0.8256518148225308 -0.7080524949584655, 0.8229310240856396 -0.7144489842966563, 0.8195963691067362 -0.7205479886628799, 0.8156799644361754 -0.72629077…

## Sheet: ED_Fig4b_Fgf9_10.5_Male
Chr	Start	End	Region	LDBindex	LDBx	LDBy	Signal	LMIpval	LMIq	LMItype	Geometry
14	56070000	60060000	14:56070000-60050000	1	0.760051	0.865857	-3.66917	0.297434	3	0.292336	POLYGON ((0.773968088426212 0.9198461955218276, 0.7888732557306677 0.9101460493781611, 0.7930755229540892 0.907107667232999, 0.7969597415831362 0.9036720215121996, 0.8004885044690812 0.8998721993621694, 0.8036278276963145 0.8957447951474073, 0.8063474778660291 0.8913295580267701, 0.8086212632603788 0.8866690091473435, 0.8104272860830383 0.8818080321425517, 0.811748153346953 0.876793440878231, 0.8…
14	56070000	60060000	14:56070000-60050000	2	0.73024	0.885258	-3.66917	0.404012	2	-0.0977224	POLYGON ((0.7373477028880145 0.9381584757525673, 0.7373946092394283 0.9380061307297178, 0.7436157214599198 0.9363784070778214, 0.7489990935129469 0.9346574535994356, 0.7541678697958597 0.9323713811436111, 0.7590629211217562 0.9295463416654941, 0.773968088426212 0.9198461955218276, 0.7163226662614459 0.8312686989587655, 0.7085880290727674 0.8363023298845983, 0.6995203419705406 0.8386748459622981, …
14	56070000	60060000	14:56070000-60050000	3	0.695551	0.894334	-2.13414	0.187916	4	-0.088424	POLYGON ((0.6995203419705406 0.8386748459622981, 0.6863966364933891 0.8421085994534054, 0.6669731875731123 0.8536626776239628, 0.6443265436173872 0.88113217809801, 0.6416079115052836 0.8899619006996257, 0.6406615579009385 0.896853396134674, 0.7212332824702299 0.9216610699002756, 0.6995203419705406 0.8386748459622981))
14	56070000	60060000	14:56070000-60050000	4	0.684628	0.929811	-3.66917	0.157137	3	0.360561	POLYGON ((0.7036430599386869 0.9822623673124211, 0.7176260155073955 0.9710828015788578, 0.7215668215642941 0.9675967038284307, 0.7251414121693988 0.9637359873263395, 0.728314348135385 0.959538927967768, 0.7310541723572327 0.9550471362164733, 0.7333337216840916 0.9503051445705466, 0.7351303962200478 0.9453599660585544, 0.7373477028880145 0.9381584757525673, 0.7212332824702299 0.9216610699002756, 0…
14	56070000	60060000	14:56070000-60050000	5	0.656662	0.95217	-1.19985	0.0903382	4	-0.510882	POLYGON ((0.6795365907644454 1.003455804212776, 0.6915261931398785 0.9919499693502369, 0.7036430599386869 0.9822623673124211, 0.6385666198141263 0.9008673478172032, 0.6136510366244495 0.9242856517757356, 0.6179397153698174 0.9392690631049949, 0.6795365907644454 1.003455804212776))
14	56070000	60060000	14:56070000-60050000	6	0.629236	0.97849	-3.66917	0.411312	3	0.0698467	POLYGON ((0.5997825143503684 1.026325769921383, 0.6184466480486622 1.03021850190961, 0.6235094322827596 1.03102046486587, 0.6286260990594359 1.031328117073233, 0.6337485006679777 1.031138563531863, 0.6388284354330427 1.030453587936003, 0.6438181012912587 1.029279635889456, 0.6486705456074862 1.02762775425261, 0.6533401069979788 1.025513487191745, 0.6577828450029023 1.022956729908808, 0.6619569535…
14	56070000	60060000	14:56070000-60050000	7	0.591907	0.970704	-3.66917	0.272115	3	0.233083	POLYGON ((0.5921460329852565 1.026392448929247, 0.5951853524157674 1.025366951279856, 0.5997825143503684 1.026325769921383, 0.6179397153698174 0.9392690631049949, 0.6136510366244495 0.9242856517757356, 0.5881472395834794 0.9252446620267581, 0.5622441500995594 0.9377707210126978, 0.5921460329852565 1.026392448929247))
14	56070000	60060000	14:56070000-60050000	8	0.558598	0.981944	-1.76235	0.0621188	4	-0.277976	POLYGON ((0.5675104048480073 1.037313489814721, 0.5799039505953983 1.03052305349434, 0.5921460329852565 1.026392448929247, 0.5622441500995594 0.9377707210126978, 0.5485032879021572 0.9383569836451515, 0.5365541748477566 0.9514151439816279, 0.5318436027266867 0.9722163262602961, 0.5675104048480073 1.037313489814721))
14	56070000	60060000	14:56070000-60050000	9	0.525642	1	-3.66917	0.103778	3	0.490494	POLYGON ((0.4717925421294081 1.015748062284319, 0.4828589159473508 1.03101387856986, 0.4860398069702169 1.034984545601338, 0.4895878117066538 1.038630903615086, 0.493470039921525 1.04191915063468, 0.4976505031062671 1.044818804395946, 0.5020904480947095 1.047302984919543, 0.5067487163074503 1.049348663690117, 0.51158212529457 1.050936877132145, 0.5165458690397564 1.052052902403513, 0.521593933314…
14	56070000	60060000	14:56070000-60050000	10	0.503509	0.969468	-3.66917	0.459851	3	0.0681274	POLYGON ((0.4510189381892794 0.949844301107031, 0.4506763637149726 0.9684981010553585, 0.450811553049627 0.9733681099720148, 0.4513946945081411 0.9782049693915015, 0.4524208311360711 0.9829675639181575, 0.453881240328561 0.98761540944001, 0.4557635079762544 0.9921089972612238, 0.458051633990589 0.9964101299430925, 0.4607261683114652 1.000482245998778, 0.4717925421294081 1.015748062284319, 0.53184…
14	56070000	60060000	14:56070000-60050000	11	0.504194	0.932161	-3.66917	0.459671	3	0.0681274	POLYGON ((0.461976467951542 0.8950500816699379, 0.4549893998660798 0.9128962292360047, 0.4534762783766528 0.9173308316032115, 0.452361949507494 0.9218820408895837, 0.4516551751613512 0.926514071202593, 0.4513615126635862 0.9311905011587035, 0.4510189381892794 0.949844301107031, 0.5365541748477566 0.9514151439816279, 0.5485032879021572 0.9383569836451515, 0.5384527313159333 0.9249918299980067, 0.4…
14	56070000	60060000	14:56070000-60050000	12	0.518168	0.896468	-1.69838	0.0605588	4	-0.355081	POLYGON ((0.5295307645779587 0.8427705928339472, 0.5147191230451067 0.8437395019082631, 0.5097664203538707 0.8442990513220723, 0.5048884694981515 0.8453227480268927, 0.5001286692281862 0.8468014842725798, 0.4955293671176185 0.848722103857505, 0.4911314828004226 0.8510675191782604, 0.4869741439120952 0.85381686325674, 0.4830943379741182 0.8569456753920255, 0.4795265833188509 0.8604261187853434, 0.…
14	56070000	60060000	14:56070000-60050000	13	0.554848	0.894069	-2.064	0.0829983	4	-0.144064	POLYGON ((0.5485032879021572 0.9383569836451515, 0.5622441500995594 0.9377707210126978, 0.5881472395834794 0.9252446620267581, 0.5607056705683614 0.8613186177572588, 0.5333554997217115 0.847070826691438, 0.5384527313159333 0.9249918299980067, 0.5485032879021572 0.9383569836451515))
14	56070000	60060000	14:56070000-60050000	14	0.588483	0.879631	-3.66917	0.408092	2	-0.065364	POLYGON ((0.6416079115052836 0.8899619006996257, 0.6389163705870625 0.8987036350346922, 0.6371666826910404 0.900102534627177, 0.6374501654944369 0.8994909736973903, 0.6391509145732907 0.8946298279901023, 0.6403703699293758 0.8896262079354597, 0.6410969480526849 0.8845276425247353, 0.6411916258536828 0.8823798179801932, 0.641197168016337 0.8823777150399107, 0.6053753918891623 0.8567374443421968, 0…
14	56070000	60060000	14:56070000-60050000	15	0.584187	0.837749	-2.92707	0.415232	3	0.0391574	POLYGON ((0.5896464076935237 0.7839063386865718, 0.5780364415035605 0.785267042631738, 0.5729685753817556 0.7861124976925817, 0.5680067733850378 0.7874461326628072, 0.5631979447562205 0.7892553392588343, 0.5585875525165906 0.7915230131077821, 0.554219183655145 0.7942277154534741, 0.5501341370539745 0.7973438758400246, 0.5463710330455807 0.8008420338568173, 0.5429654482933973 0.8046891176594055, 0…
14	56070000	60060000	14:56070000-60050000	16	0.621599	0.833365	-3.66917	0.309094	3	0.175027	POLYGON ((0.6443725730613059 0.8809826811434572, 0.6443265436173872 0.88113217809801, 0.6669731875731123 0.8536626776239628, 0.6061379636406479 0.7952191229240774, 0.5977809659266304 0.7919393455563443, 0.6053753918891623 0.8567374443421968, 0.641197168016337 0.8823777150399107, 0.6427518714267261 0.8817877921825337, 0.6443725730613059 0.8809826811434572))
14	56070000	60060000	14:56070000-60050000	17	0.644873	0.809138	-0.973747	0.0629787	4	-0.58493	POLYGON ((0.6863966364933891 0.8421085994534054, 0.6860583193132299 0.842197118492521, 0.6864911860218113 0.8416981869259765, 0.6895752245275634 0.8373150638210572, 0.692199420732263 0.8326420930382383, 0.6943367802163254 0.8277273442050092, 0.6959653165221018 0.8226213740563882, 0.6970682773228157 0.8173767063710218, 0.6976343167493637 0.8120472916728179, 0.697657612102302 0.8066879522560267, 0.…
14	56070000	60060000	14:56070000-60050000	18	0.643417	0.777771	-3.66917	0.195796	3	0.304218	POLYGON ((0.5964655101407178 0.7524482910088718, 0.5966150957971011 0.7526696309858537, 0.5945842188469956 0.7575816603307582, 0.5926687197762138 0.7630445639599543, 0.591362297727733 0.7686842194621361, 0.5906806323628306 0.7744329397616756, 0.5906319050207908 0.7802217287885951, 0.5907966871830201 0.783771524354317, 0.5896464076935237 0.7839063386865718, 0.5977809659266304 0.7919393455563443, 0…
14	56070000	60060000	14:56070000-60050000	19	0.656299	0.746613	-3.66917	0.455331	3	0.0405999	POLYGON ((0.6986904776129356 0.7823819955342237, 0.7051317089293011 0.7668027566041347, 0.706882564439435 0.7618957917677891, 0.7081416914914862 0.7568402603427763, 0.7088968499240498 0.7516853079022366, 0.7091406987296511 0.7464810465057937, 0.7088708674177712 0.7412780675527681, 0.7080899790587382 0.7361269499756569, 0.7069256005737534 0.7315494293249982, 0.6630798382582394 0.7203183203966266, …
14	56070000	60060000	14:56070000-60050000	20	0.636153	0.716804	-1.85615	0.163997	1	0.143507	POLYGON ((0.5948370003110706 0.7500386059032011, 0.5964655101407178 0.7524482910088718, 0.6196190379502051 0.7496899342807046, 0.6630798382582394 0.7203183203966266, 0.6428276778504632 0.6904555002717616, 0.6248929469559997 0.6939531746053843, 0.5948370003110706 0.7500386059032011))
14	56070000	60060000	14:56070000-60050000	21	0.669776	0.694002	-3.66917	0.392352	2	-0.0951321	POLYGON ((0.7069256005737534 0.7315494293249982, 0.7069197352832857 0.7315263711110372, 0.70767062588787 0.7308285905469065, 0.711219697780299 0.7267833632971482, 0.7143389310026945 0.7223981427891097, 0.7169959743852966 0.7177184103968902, 0.7191632703665504 0.7127927020285986, 0.7208183408067302 0.7076721047355223, 0.7256021103188002 0.6898101018783095, 0.6544773230847064 0.670761589153124, 0.6…
14	56070000	60060000	14:56070000-60050000	22	0.679343	0.658278	-1.47674	0.362033	1	0.13361	POLYGON ((0.7256021103188002 0.6898101018783095, 0.7303858798308701 0.6719480990210966, 0.7314924656259255 0.6668033473987498, 0.7320818422562668 0.6615740418458999, 0.732148164380255 0.6563120457651973, 0.7316907742258424 0.6510695467786352, 0.7307142081142491 0.6458985391391951, 0.7292281514694668 0.6408503080602965, 0.7272473427597971 0.6359749210773838, 0.7247914273241177 0.6313207314862465, …
14	56070000	60060000	14:56070000-60050000	23	0.648044	0.639631	-0.71633	0.233335	1	0.399398	POLYGON ((0.6907383391288245 0.6035584145904574, 0.6750887463545571 0.5942351520573718, 0.6705072375833918 0.5918021027597196, 0.665709240561667 0.5898300033492967, 0.6607409955049049 0.5883378597365604, 0.6556503833770062 0.5873400523060608, 0.6504864644422578 0.5868461973269259, 0.6452990054519521 0.5868610542770312, 0.6401380000223081 0.5873844799740087, 0.6350531868260051 0.5884114299551529, …
14	56070000	60060000	14:56070000-60050000	24	0.626742	0.668546	-1.27439	0.308714	1	0.15217	POLYGON ((0.6428276778504632 0.6904555002717616, 0.6544773230847064 0.670761589153124, 0.6535455621599019 0.6659884718415805, 0.605580907364293 0.6306525167388265, 0.5957502445935126 0.655791397197094, 0.5980357165123562 0.66856892194506, 0.6248929469559997 0.6939531746053843, 0.6428276778504632 0.6904555002717616))
14	56070000	60060000	14:56070000-60050000	25	0.59963	0.697231	-3.66917	0.331753	2	-0.160579	POLYGON ((0.5563627978338391 0.7320355807639117, 0.5706274020226818 0.7414018795640355, 0.5751639392742204 0.744067242839532, 0.5799430556778281 0.7462682376204731, 0.5849173675725607 0.7479830416322727, 0.5900375559863857 0.749194653051786, 0.5946861436662924 0.7498153852609947, 0.5948370003110706 0.7500386059032011, 0.6248929469559997 0.6939531746053843, 0.5980357165123562 0.66856892194506, 0.5…
14	56070000	60060000	14:56070000-60050000	26	0.571101	0.678498	-1.02656	0.195456	4	-0.309823	POLYGON ((0.515988832533426 0.6721392220958462, 0.5192574728543726 0.6887191500219904, 0.5205275302867665 0.6938131064898118, 0.5222967869116548 0.6987558961245146, 0.5245477788920156 0.7034987300328429, 0.5272582873159459 0.7079947930285584, 0.5304015575133221 0.7121997057320427, 0.5339465631436627 0.7160719626267349, 0.5378583124484521 0.7195733417484693, 0.5420981936449965 0.722669281963788, 0…
14	56070000	60060000	14:56070000-60050000	27	0.564327	0.644139	-0.494172	0.406532	4	-0.120881	POLYGON ((0.6052607353336151 0.6247056873011582, 0.5319834615263693 0.6261795048504064, 0.5120597224561624 0.6508538340065706, 0.5160719500378335 0.6714995285863916, 0.5957502445935126 0.655791397197094, 0.605580907364293 0.6306525167388265, 0.6052607353336151 0.6247056873011582))
14	56070000	60060000	14:56070000-60050000	28	0.563579	0.606934	-3.66917	0.111018	2	-0.452674	POLYGON ((0.6156119106107913 0.5979659284055381, 0.6155911829499399 0.5979830472671019, 0.61516360640417 0.5954764745381507, 0.6137747365621188 0.5904224838699945, 0.6118920117129976 0.5855309474800174, 0.6095339552537142 0.5808499912906474, 0.6067237671838585 0.5764256694076907, 0.6034890958499367 0.5723015110119117, 0.5998617659240529 0.5685180920923686, 0.5887538102487739 0.5580270807666303, 0…
14	56070000	60060000	14:56070000-60050000	29	0.541363	0.585952	-3.66917	0.338093	3	0.274461	POLYGON ((0.5887538102487739 0.5580270807666303, 0.5776458545734949 0.5475360694408919, 0.5735961041363238 0.5440801493166717, 0.5692191598414489 0.5410492713666513, 0.564559451760408 0.5384742018320872, 0.5596642802811975 0.5363810800732105, 0.5545833359651678 0.5347911532303136, 0.5493681951414273 0.5337205605454362, 0.5440717963589426 0.5331801695339892, 0.5387479030108359 0.5331754656693255, …
14	56070000	60060000	14:56070000-60050000	30	0.507614	0.598344	-3.66917	0.262035	3	0.199464	POLYGON ((0.4831592798841123 0.6274781913239315, 0.4848141645896606 0.631603372594014, 0.5120597224561624 0.6508538340065706, 0.5319834615263693 0.6261795048504064, 0.5334576384156992 0.6165750516593391, 0.5064699964216445 0.5430752939859145, 0.4831592798841123 0.6274781913239315))
14	56070000	60060000	14:56070000-60050000	31	0.477123	0.589923	-3.66917	0.0578188	3	0.55222	POLYGON ((0.5064336120286952 0.5424866635270109, 0.5053273331218422 0.5428928670306521, 0.4911902087491742 0.5389884216940503, 0.4858815962083731 0.5378124848936756, 0.4804802462282888 0.5371882951312891, 0.4750433481811174 0.5371224613140665, 0.4696284678211909 0.5376156804889849, 0.4515546775898835 0.540205209674392, 0.4610445579557781 0.6064404573865793, 0.4831592798841123 0.6274781913239315, …
14	56070000	60060000	14:56070000-60050000	32	0.440975	0.595102	-3.66917	0.0347793	3	0.589806	POLYGON ((0.4515546775898835 0.540205209674392, 0.4334808873585761 0.5427947388597992, 0.4283531024668068 0.5437902394824141, 0.4233486587027486 0.5452871503008193, 0.4185164584362107 0.5472708438179614, 0.4139037209098443 0.5497219357988409, 0.4095555208226538 0.5526164746891714, 0.4055143478695373 0.5559261756649214, 0.401819691540943 0.5596186970256529, 0.39850765523989 0.5636579562308027, 0.3…
14	56070000	60060000	14:56070000-60050000	33	0.44535	0.623323	-1.35247	1.99996e-05	4	-0.763278	POLYGON ((0.4093437246002523 0.6144549726664248, 0.4499092818605851 0.6450352438433804, 0.4848141645896606 0.631603372594014, 0.4831592798841123 0.6274781913239315, 0.4610445579557781 0.6064404573865793, 0.4093437246002523 0.6144549726664248))
14	56070000	60060000	14:56070000-60050000	34	0.42778	0.646629	-3.66917	0.116618	3	0.327767	POLYGON ((0.3896602753421221 0.6094145107768979, 0.3855852309323661 0.6148201674627329, 0.3827257067441009 0.61901907223288, 0.3802826076612547 0.6234731654877894, 0.3782785143631771 0.6281412796578407, 0.376731949957862 0.6329802690556641, 0.3756572087795733 0.6379454086560906, 0.3750642242714946 0.642990807473351, 0.3749584771745135 0.6480698327148234, 0.3750976891708829 0.6499136677401275, 0.4…
14	56070000	60060000	14:56070000-60050000	35	0.461081	0.664203	-3.66917	0.127697	3	0.311438	POLYGON ((0.4960802180569063 0.7037269856137145, 0.4960827863307554 0.7037061317640596, 0.49768589963519 0.7023128032250895, 0.5012909432254369 0.6984876460940564, 0.5044981275918502 0.6943232572067757, 0.5072757188709399 0.6898608415996187, 0.5095962338586207 0.6851445531694416, 0.5114367119460119 0.6802210577876516, 0.5127789423058866 0.675139071559246, 0.5136096440818467 0.6699488787955724, 0.…
14	56070000	60060000	14:56070000-60050000	36	0.42368	0.670553	-3.66917	0.116418	3	0.327767	POLYGON ((0.3750976891708829 0.6499136677401275, 0.3750980819255397 0.6499188696969374, 0.3739440139955135 0.6527055943222024, 0.3724598168343286 0.6575648239393964, 0.3714491658329996 0.6625441349599491, 0.3709214047051948 0.6675974924456077, 0.3708814127305636 0.672678176880588, 0.3711735188618164 0.675977007111405, 0.3710976482309292 0.6758187312554185, 0.3742829760472935 0.686914789473799, 0.…
14	56070000	60060000	14:56070000-60050000	37	0.443544	0.698533	-3.66917	0.0658187	3	0.439846	POLYGON ((0.4957162763755323 0.7066821163950209, 0.4960802180569063 0.7037269856137145, 0.4440383886136385 0.6771410504888826, 0.4202075111402805 0.6940592925564362, 0.4382759063119392 0.7199273710006718, 0.4957162763755323 0.7066821163950209))
14	56070000	60060000	14:56070000-60050000	38	0.416375	0.717509	-3.66917	0.0161797	3	0.531451	POLYGON ((0.3654285917042113 0.7318319033710735, 0.3655265544337196 0.7316912357313834, 0.3659102709326505 0.7331784067850174, 0.3676668113403733 0.7379964765483625, 0.3681548670705131 0.7390154356293723, 0.3738925207192546 0.7457151616772739, 0.4186793214996484 0.747354610307704, 0.4256575302475221 0.7434123052365617, 0.4382759063119392 0.7199273710006718, 0.4202075111402805 0.6940592925564362, …
14	56070000	60060000	14:56070000-60050000	39	0.452381	0.736855	-3.66917	0.0306394	3	0.590237	POLYGON ((0.4978279473467708 0.767559936173414, 0.5024915936013713 0.7536216208050021, 0.503915663855927 0.748532738488255, 0.5048243407531502 0.7433270679627545, 0.5052085367819801 0.7380566701850679, 0.5050644096683672 0.7327742534371453, 0.5043934008011518 0.7275326462004544, 0.5032022208169986 0.722384268828023, 0.5015027824885494 0.717380609298098, 0.4993120815869683 0.7125717082923148, 0.49…
14	56070000	60060000	14:56070000-60050000	40	0.443053	0.764732	-3.66917	1.99996e-05	3	0.81532	POLYGON ((0.4642108072987735 0.8131561166375904, 0.4642134995768774 0.813123765450672, 0.4681433556150305 0.811236643849346, 0.4724039966977213 0.8086720895920998, 0.4764046874748782 0.8057183674861047, 0.4801099950970519 0.8024016377113214, 0.4834871028297198 0.7987512754915099, 0.486506100700697 0.7947996109271893, 0.4891402504032736 0.7905816426581896, 0.4913662221089183 0.7861347278917992, 0.…
14	56070000	60060000	14:56070000-60050000	41	0.414199	0.776951	-3.66917	0.0594188	3	0.392254	POLYGON ((0.4389978869290967 0.7953307716614869, 0.4186793214996484 0.747354610307704, 0.3738925207192546 0.7457151616772739, 0.3763984106135358 0.7749518151534152, 0.3874766970326353 0.7910431586044189, 0.4389978869290967 0.7953307716614869))
14	56070000	60060000	14:56070000-60050000	42	0.411503	0.809358	-3.66917	0.0707386	3	0.432752	POLYGON ((0.4413567672267292 0.8563859173828851, 0.4524834362622479 0.8427169271728358, 0.4556099704745726 0.8384575742629472, 0.4582955112137291 0.8339072803900039, 0.4605132079924345 0.8291115401562618, 0.4622408879058857 0.8241183021779084, 0.4634612773201852 0.8189774896867471, 0.4641621745770332 0.8137405013893422, 0.4642108072987735 0.8131561166375904, 0.4389978869290967 0.7953307716614869,…
14	56070000	60060000	14:56070000-60050000	43	0.389249	0.836696	-3.66917	0.238255	3	0.218282	POLYGON ((0.3643770248326365 0.8858424298214116, 0.3651877010650872 0.8836724836690479, 0.3681503652022219 0.8851428080251952, 0.3730858208196749 0.8870050421985933, 0.3781823558282106 0.8883659129401371, 0.3833891797013415 0.8892118582236008, 0.3886544028071113 0.8895344476141391, 0.3939255535244737 0.8893304662834506, 0.3991501011595981 0.8886019470477843, 0.4042759794508767 0.8873561501095079,…
14	56070000	60060000	14:56070000-60050000	44	0.364776	0.810977	-3.66917	0.257515	3	0.177358	POLYGON ((0.3428898020728659 0.8056277119379269, 0.3474031722823907 0.8353652461999351, 0.3554739450404414 0.8443322289399657, 0.3882428248314524 0.8131507369399751, 0.3874766970326353 0.7910431586044189, 0.3763984106135358 0.7749518151534152, 0.3428898020728659 0.8056277119379269))
14	56070000	60060000	14:56070000-60050000	45	0.339489	0.783355	-3.66917	0.334993	2	-0.108829	POLYGON ((0.362610342260281 0.7358787127987532, 0.3629204455676224 0.7354334261012231, 0.3469658813200879 0.7384229952652273, 0.298588823880883 0.7724046057529292, 0.2948962853445538 0.7792778635499965, 0.2946224221464345 0.7829544133701072, 0.3428898020728659 0.8056277119379269, 0.3763984106135358 0.7749518151534152, 0.3738925207192546 0.7457151616772739, 0.3681548670705131 0.7390154356293723, 0…
14	56070000	60060000	14:56070000-60050000	46	0.323576	0.817231	-1.21779	0.276094	1	0.155783	POLYGON ((0.2946224221464345 0.7829544133701072, 0.280382786187751 0.808738777432609, 0.2801347797529838 0.8151748823450158, 0.2909892113447712 0.8315035399987701, 0.3474031722823907 0.8353652461999351, 0.3428898020728659 0.8056277119379269, 0.2946224221464345 0.7829544133701072))
14	56070000	60060000	14:56070000-60050000	47	0.321327	0.850084	-0.586952	0.342773	4	-0.189897	POLYGON ((0.3554739450404414 0.8443322289399657, 0.3474031722823907 0.8353652461999351, 0.2909892113447712 0.8315035399987701, 0.2937877451585556 0.8579319328396406, 0.3632711152940709 0.8838904187947347, 0.3554739450404414 0.8443322289399657))
14	56070000	60060000	14:56070000-60050000	48	0.309436	0.881914	-2.1932	0.422472	1	0.0123349	POLYGON ((0.3038287308035824 0.9374807946094875, 0.3214346310347315 0.9333757121756718, 0.3264331506319331 0.9319476602357807, 0.3312671610034523 0.9300353646951594, 0.3358898764962175 0.9276573335810687, 0.3402565564608152 0.9248365825120418, 0.3443249382709378 0.9216004119427271, 0.348055646359447 0.9179801429382238, 0.3514125733122236 0.914010814035203, 0.3543632293314127 0.9097308421237229, 0…
14	56070000	60060000	14:56070000-60050000	49	0.274224	0.890125	-3.66917	0.0748185	2	-0.502974	POLYGON ((0.2241361961439848 0.9071600495973212, 0.2242287489711447 0.9070781868548756, 0.2246703541634155 0.9084737722850228, 0.2266653724445542 0.9131557088934164, 0.229101539598072 0.9176240103545104, 0.2319562579184947 0.92183722903601, 0.235203047250828 0.9257562834345275, 0.238811790618508 0.9293448206927039, 0.2427490135862369 0.9325695538056114, 0.2469781947663575 0.9354005703885383, 0.25…
14	56070000	60060000	14:56070000-60050000	50	0.265215	0.856026	-3.66917	0.0554989	2	-0.414619	POLYGON ((0.2909892113447712 0.8315035399987701, 0.2801347797529838 0.8151748823450158, 0.2534743213471652 0.833236462337332, 0.2409416034525187 0.8806779485407371, 0.2877037640580431 0.8683239481077043, 0.2937877451585556 0.8579319328396406, 0.2909892113447712 0.8315035399987701))
14	56070000	60060000	14:56070000-60050000	51	0.23201	0.847254	-0.284379	0.0946981	1	0.615006	POLYGON ((0.2210027159947006 0.8287080894554805, 0.2199948694422422 0.8294517756964837, 0.2238854789884773 0.8873317003309652, 0.2272455822259752 0.8941640985471584, 0.2409416034525187 0.8806779485407371, 0.2534743213471652 0.833236462337332, 0.2210027159947006 0.8287080894554805))
14	56070000	60060000	14:56070000-60050000	52	0.206528	0.812721	-0.860506	0.252935	1	0.216551	POLYGON ((0.1863727627236963 0.7809744764239508, 0.1853224293263888 0.7819307256376443, 0.1887195932195675 0.8328782981728783, 0.2199948694422422 0.8294517756964837, 0.2210027159947006 0.8287080894554805, 0.2225818650296496 0.7877073804400421, 0.2123653153895166 0.7753220381792032, 0.1863727627236963 0.7809744764239508))
14	56070000	60060000	14:56070000-60050000	53	0.168392	0.815264	-1.66389	0.105618	1	0.23843	POLYGON ((0.1132516085147586 0.8171048651046889, 0.1127767573151386 0.8189024066509621, 0.184722560947443 0.8379081154387542, 0.1887195932195675 0.8328782981728783, 0.1853224293263888 0.7819307256376443, 0.143229150465273 0.7905515288724443, 0.1132516085147586 0.8171048651046889))
14	56070000	60060000	14:56070000-60050000	54	0.159339	0.849533	-3.66917	0.0811384	2	-0.489596	POLYGON ((0.1127767573151386 0.8189024066509621, 0.1082503110329915 0.8360371959399947, 0.1071500737681406 0.8412560091528783, 0.1065815262220434 0.8465591485134608, 0.1065504605886936 0.8518925872087452, 0.1070571933555619 0.8572019897450871, 0.1080965620793156 0.8624332655021099, 0.1096579779792617 0.8675331197919232, 0.1117255338127083 0.8724495968096171, 0.1142781659332417 0.8771326089436131,…
14	56070000	60060000	14:56070000-60050000	55	0.187183	0.869299	-0.954187	0.329233	1	0.163354	POLYGON ((0.142672852258992 0.9025045333304821, 0.1565945896372325 0.912387565718017, 0.1608574457852932 0.9151164802477679, 0.1653618389544176 0.917425020745071, 0.1700664411797823 0.9192920062701454, 0.1749280875714725 0.9207003071655188, 0.1799021723538562 0.9216370022212348, 0.1849430581251353 0.9220934972274055, 0.1900044945821032 0.9220656038263879, 0.1950400428682932 0.9215535779411117, 0.…
14	56070000	60060000	14:56070000-60050000	56	0.21047	0.848702	-3.66917	0.0443391	2	-0.489398	POLYGON ((0.1887195932195675 0.8328782981728783, 0.184722560947443 0.8379081154387542, 0.184807830998852 0.8431510793041735, 0.2238854789884773 0.8873317003309652, 0.2199948694422422 0.8294517756964837, 0.1887195932195675 0.8328782981728783))
14	56070000	60060000	14:56070000-60050000	57	0.236664	0.813881	-0.784302	0.0570589	1	0.494156	POLYGON ((0.280382786187751 0.808738777432609, 0.2225818650296496 0.7877073804400421, 0.2210027159947006 0.8287080894554805, 0.2534743213471652 0.833236462337332, 0.2801347797529838 0.8151748823450158, 0.280382786187751 0.808738777432609))
14	56070000	60060000	14:56070000-60050000	58	0.250192	0.776703	-0.811772	0.0534189	1	0.530916	POLYGON ((0.2238503617269286 0.754890522535088, 0.2123653153895166 0.7753220381792032, 0.2225818650296496 0.7877073804400421, 0.280382786187751 0.808738777432609, 0.2946224221464345 0.7829544133701072, 0.2948962853445538 0.7792778635499965, 0.2350154431716021 0.7483946294803017, 0.2238503617269286 0.754890522535088))
14	56070000	60060000	14:56070000-60050000	59	0.266879	0.744347	-3.66917	0.0261195	2	-0.508596	POLYGON ((0.2770427802146457 0.7186112915973195, 0.2419129492943774 0.7337941398306447, 0.2350154431716021 0.7483946294803017, 0.2948962853445538 0.7792778635499965, 0.298588823880883 0.7724046057529292, 0.2770427802146457 0.7186112915973195))
14	56070000	60060000	14:56070000-60050000	60	0.302162	0.730215	-0.379937	0.152017	1	0.43919	POLYGON ((0.3469658813200879 0.7384229952652273, 0.2968529766021373 0.7035237324313776, 0.2798377695972695 0.7121053291652976, 0.2770427802146457 0.7186112915973195, 0.298588823880883 0.7724046057529292, 0.3469658813200879 0.7384229952652273))
14	56070000	60060000	14:56070000-60050000	61	0.323729	0.699246	-1.95923	0.466191	4	-0.015095	POLYGON ((0.3710976482309292 0.6758187312554185, 0.363457053462854 0.6598794717155932, 0.3017969223882967 0.6894366838125521, 0.2968529766021373 0.7035237324313776, 0.3469658813200879 0.7384229952652273, 0.3629204455676224 0.7354334261012231, 0.3654285917042113 0.7318319033710735, 0.3742829760472935 0.686914789473799, 0.3710976482309292 0.6758187312554185))
14	56070000	60060000	14:56070000-60050000	62	0.307886	0.666195	-0.54064	0.452831	1	0.063015	POLYGON ((0.363457053462854 0.6598794717155932, 0.3555354701997045 0.6433540341769806, 0.3530915283471967 0.6388336963438357, 0.3502200722666974 0.6345721184808882, 0.3469482573947373 0.6306096024433409, 0.3433070253715866 0.6269836218507588, 0.3393308114253407 0.6237284676980527, 0.3350572187170517 0.620874924064628, 0.3305266627266343 0.6184499769885266, 0.3257819890425971 0.6164765592587479, 0…
14	56070000	60060000	14:56070000-60050000	63	0.278545	0.683389	-1.64969	0.102538	1	0.265683	POLYGON ((0.2577366287782905 0.6372097514554675, 0.2405784365311724 0.6512873698629419, 0.2344619395864878 0.6626989969770318, 0.2798377695972695 0.7121053291652976, 0.2968529766021373 0.7035237324313776, 0.3017969223882967 0.6894366838125521, 0.2689449120495823 0.6333745115438647, 0.2577366287782905 0.6372097514554675))
14	56070000	60060000	14:56070000-60050000	64	0.251335	0.708379	-0.657314	0.0320194	1	0.766925	POLYGON ((0.2798377695972695 0.7121053291652976, 0.2344619395864878 0.6626989969770318, 0.219393920845445 0.6751274210521031, 0.2419129492943774 0.7337941398306447, 0.2770427802146457 0.7186112915973195, 0.2798377695972695 0.7121053291652976))
14	56070000	60060000	14:56070000-60050000	65	0.217906	0.721211	-1.38673	0.00797984	1	0.568931	POLYGON ((0.208738228697745 0.6783177899723024, 0.1806686357953405 0.7042904654847669, 0.2238503617269286 0.754890522535088, 0.2350154431716021 0.7483946294803017, 0.2419129492943774 0.7337941398306447, 0.219393920845445 0.6751274210521031, 0.208738228697745 0.6783177899723024))
14	56070000	60060000	14:56070000-60050000	66	0.191524	0.743725	-3.66917	0.050299	2	-0.429853	POLYGON ((0.1806686357953405 0.7042904654847669, 0.1785949545295859 0.7049519383258069, 0.1623142938936975 0.7219418198768345, 0.1863727627236963 0.7809744764239508, 0.2123653153895166 0.7753220381792032, 0.2238503617269286 0.754890522535088, 0.1806686357953405 0.7042904654847669))
14	56070000	60060000	14:56070000-60050000	67	0.156652	0.757937	-1.1775	0.316054	1	0.127014	POLYGON ((0.143229150465273 0.7905515288724443, 0.1853224293263888 0.7819307256376443, 0.1863727627236963 0.7809744764239508, 0.1623142938936975 0.7219418198768345, 0.1501932800217672 0.7252140845921403, 0.1367290141341066 0.7417693089402606, 0.143229150465273 0.7905515288724443))
14	56070000	60060000	14:56070000-60050000	68	0.121735	0.76259	-3.66917	0.375052	3	0.104172	POLYGON ((0.0669017892898611 0.7509976978396917, 0.06934876430773573 0.7695128987727513, 0.07028043041415008 0.7746177391258037, 0.0717083054397267 0.7796065836488699, 0.0736186194609629 0.7844313216836508, 0.07599295008271391 0.7890454251569822, 0.07880840009727882 0.7934043972811738, 0.08203781829700166 0.7974662016653474, 0.08565006131094885 0.8011916676995749, 0.08961029394060216 0.8045448683…
14	56070000	60060000	14:56070000-60050000	69	0.116841	0.725559	-3.66917	0.452451	2	-0.0129933	POLYGON ((0.08488277466714701 0.679179711638592, 0.07365010595690388 0.6951158746159236, 0.07100508715785023 0.6992662722186983, 0.0687576819012518 0.7036447530421205, 0.06692738580492871 0.7082133349783724, 0.06553007618032146 0.7129323868451611, 0.06457787430121366 0.7177609721752434, 0.06407904025504096 0.7226572043289348, 0.06403790128892156 0.7275786098491016, 0.06445481427198646 0.732482496…
14	56070000	60060000	14:56070000-60050000	70	0.139306	0.693687	-3.66917	0.366873	2	-0.105383	POLYGON ((0.1153243909864794 0.6427145854368514, 0.1016352823935488 0.6566309487600608, 0.09874039936226137 0.6598245884964796, 0.09611544337739018 0.6632435486612605, 0.08488277466714701 0.679179711638592, 0.1501932800217672 0.7252140845921403, 0.1623142938936975 0.7219418198768345, 0.1785949545295859 0.7049519383258069, 0.1153243909864794 0.6427145854368514))
14	56070000	60060000	14:56070000-60050000	71	0.166685	0.665854	-0.0827985	0.453631	4	-0.0807191	POLYGON ((0.1408701112768834 0.6158692832711301, 0.1283958691661584 0.6294261058923354, 0.1153243909864794 0.6427145854368514, 0.1785949545295859 0.7049519383258069, 0.1806686357953405 0.7042904654847669, 0.208738228697745 0.6783177899723024, 0.1408701112768834 0.6158692832711301))
14	56070000	60060000	14:56070000-60050000	72	0.192826	0.637444	-1.22008	0.351613	1	0.118392	POLYGON ((0.1633768298326692 0.5896400431276405, 0.1526880194381638 0.6030257547205318, 0.1408701112768834 0.6158692832711301, 0.208738228697745 0.6783177899723024, 0.219393920845445 0.6751274210521031, 0.2344619395864878 0.6626989969770318, 0.2405784365311724 0.6512873698629419, 0.1633768298326692 0.5896400431276405))
14	56070000	60060000	14:56070000-60050000	73	0.216512	0.607781	-3.66917	0.0449191	2	-0.585926	POLYGON ((0.2016529198812431 0.5540651733200164, 0.1869627793274206 0.5639741485647414, 0.1826892121985905 0.5671827653878221, 0.1787615809395939 0.5708066183946819, 0.1752200567268509 0.5748086434036654, 0.1633768298326692 0.5896400431276405, 0.2405784365311724 0.6512873698629419, 0.2577366287782905 0.6372097514554675, 0.2016529198812431 0.5540651733200164))
14	56070000	60060000	14:56070000-60050000	74	0.245892	0.587963	-3.66917	0.232555	2	-0.248176	POLYGON ((0.210639933752467 0.5449815117315918, 0.2072524155069652 0.5502881322947833, 0.2016529198812431 0.5540651733200164, 0.2577366287782905 0.6372097514554675, 0.2689449120495823 0.6333745115438647, 0.2904959630166108 0.6162968787469078, 0.2997203774044974 0.6018466341942298, 0.210639933752467 0.5449815117315918))
14	56070000	60060000	14:56070000-60050000	75	0.264468	0.558865	-0.340979	0.338113	4	-0.260053	POLYGON ((0.2276699896270693 0.519295635535835, 0.2301359241709007 0.5187091104822169, 0.2299608202164381 0.5188458706101184, 0.2262463725610352 0.5223768866473524, 0.2228914548230935 0.5262511249739885, 0.2199276250029392 0.5304321426057494, 0.210639933752467 0.5449815117315918, 0.2997203774044974 0.6018466341942298, 0.3004901206805891 0.6006408147118666, 0.3022425145801431 0.5998571948155975, 0…
14	56070000	60060000	14:56070000-60050000	76	0.296876	0.544373	-3.66917	0.427631	3	0.0820539	POLYGON ((0.3022425145801431 0.5998571948155975, 0.3184463701598153 0.5926112989974632, 0.3232039768603244 0.5901883709258036, 0.3276928023484137 0.5872977226084455, 0.3318670211621406 0.5839688640574863, 0.3356840195919955 0.5802357788798281, 0.3391048307151727 0.5761365773457836, 0.3420945322005739 0.5717131073294552, 0.3446226028234371 0.5670105270927148, 0.3466632340500103 0.56207684427414, 0…
14	56070000	60060000	14:56070000-60050000	77	0.301457	0.511739	-3.66917	0.387712	2	-0.0749861	POLYGON ((0.2998869186949206 0.4683724197205613, 0.2690982932088472 0.4867848497623595, 0.2514464982943312 0.5105647284469503, 0.2681904181711375 0.5237071553662758, 0.3316503354863031 0.5326165068171255, 0.2998869186949206 0.4683724197205613))
14	56070000	60060000	14:56070000-60050000	78	0.333393	0.49595	-3.66917	0.48363	3	0.0170986	POLYGON ((0.3501855551223478 0.5465942893849597, 0.3568122998294322 0.5433179091978644, 0.3592292481754728 0.5420441388331378, 0.3736033899402139 0.533987216796766, 0.3333722158374456 0.4622118418701417, 0.3165210106635659 0.4513753139353858, 0.3149467903251968 0.4509721045140244, 0.3130292005317951 0.4511252082462176, 0.3109044778746887 0.4525700042264236, 0.2998869186949206 0.4683724197205613, …
14	56070000	60060000	14:56070000-60050000	79	0.362141	0.479836	-3.66917	0.0828183	3	0.50521	POLYGON ((0.3736033899402139 0.533987216796766, 0.387977531704955 0.5259302947603941, 0.3924446232076269 0.5231245764259209, 0.3966097129117826 0.5198874496718415, 0.4004312923104311 0.5162511750994988, 0.4038712762562036 0.5122519911429311, 0.406895382510828 0.507929752923399, 0.4094734733955196 0.5033275350606821, 0.4115798561374664 0.4984912023994532, 0.4131935389192093 0.4934689529287928, 0.4…
14	56070000	60060000	14:56070000-60050000	80	0.364078	0.448233	-3.66917	0.250215	3	0.256179	POLYGON ((0.4158519887951226 0.4672668951993428, 0.41682042921171 0.4514655296189346, 0.4168981221759998 0.4467337976184008, 0.4165521663575273 0.4420140901599622, 0.4157853365132437 0.4373442619070719, 0.4146037830424985 0.4327617674643753, 0.4130169826574353 0.4283033609710709, 0.4073497503412717 0.4143869049145732, 0.3165210106635659 0.4513753139353858, 0.3333722158374456 0.4622118418701417, 0…
14	56070000	60060000	14:56070000-60050000	81	0.352743	0.4204	-3.66917	0.375552	3	0.113903	POLYGON ((0.4073497503412717 0.4143869049145732, 0.4016825180251082 0.4004704488580755, 0.3993499375054901 0.3954991048371394, 0.3965140218966298 0.3907966824917495, 0.3932053980519123 0.3864139662667165, 0.3894597979011177 0.3823982878974535, 0.3853176725586228 0.3787930152445102, 0.3808237554661315 0.3756370839365102, 0.3674632299087912 0.3672558313255894, 0.3149467903251968 0.4509721045140244,…
14	56070000	60060000	14:56070000-60050000	82	0.326022	0.403638	-0.483414	0.0470391	4	-0.783463	POLYGON ((0.3674632299087912 0.3672558313255894, 0.3674362699603354 0.36723891895658, 0.3673358688021343 0.3670208809085611, 0.3028778966547093 0.3967021916600417, 0.3005944053673219 0.4025131964076463, 0.3130292005317951 0.4511252082462176, 0.3149467903251968 0.4509721045140244, 0.3674632299087912 0.3672558313255894))
14	56070000	60060000	14:56070000-60050000	83	0.312655	0.374607	-1.17819	0.219216	4	-0.412352	POLYGON ((0.3673358688021343 0.3670208809085611, 0.3606520431810229 0.352505826323165, 0.3582280429481973 0.3478624042551098, 0.355356228249264 0.3434817848964084, 0.3520648181286267 0.3394070131176942, 0.34838615466197 0.3356781284681074, 0.3443563851563436 0.332331771738414, 0.3400151069592571 0.3294008249210287, 0.3354049783669641 0.326914088104765, 0.3305712994552324 0.3248959964792137, 0.325…
14	56070000	60060000	14:56070000-60050000	84	0.281204	0.386026	-3.66917	0.299054	2	-0.191032	POLYGON ((0.2788965930744837 0.3306469920149918, 0.26317115083953 0.3363561050930868, 0.2585300491720349 0.3382957583120845, 0.2540944060172841 0.3406679195843647, 0.2499044152406085 0.343451093418204, 0.2459980447125379 0.3466200599051544, 0.2424106922605035 0.3501461032518642, 0.2391748649091511 0.353997271990083, 0.2363198843158497 0.3581386685069438, 0.2338716210706098 0.362532765271923, 0.23…
14	56070000	60060000	14:56070000-60050000	85	0.27883	0.415709	-3.66917	0.48263	3	0.011241	POLYGON ((0.2622747737644903 0.4266353397391298, 0.3109044778746887 0.4525700042264236, 0.3130292005317951 0.4511252082462176, 0.3005944053673219 0.4025131964076463, 0.2631586753669174 0.3995192765888307, 0.2622747737644903 0.4266353397391298))
14	56070000	60060000	14:56070000-60050000	86	0.246467	0.414654	-3.66917	0.191796	2	-0.250282	POLYGON ((0.2334508950041432 0.3634726976832207, 0.2327347033672336 0.3636280757020985, 0.2277837950464701 0.3652256210021116, 0.2230139679153014 0.3673022512833524, 0.2184714532491689 0.3698378389261227, 0.2142002791105055 0.3728078078928651, 0.2102418436092707 0.3761833719299947, 0.2070259788192372 0.3795250350603677, 0.2060968015954442 0.3789659840272804, 0.2065916989667239 0.388095068901241, …
14	56070000	60060000	14:56070000-60050000	87	0.262425	0.44647	-1.11087	0.47587	4	-0.0285053	POLYGON ((0.2998869186949206 0.4683724197205613, 0.3109044778746887 0.4525700042264236, 0.2622747737644903 0.4266353397391298, 0.2389138594227899 0.4383526356869805, 0.2690982932088472 0.4867848497623595, 0.2998869186949206 0.4683724197205613))
14	56070000	60060000	14:56070000-60050000	88	0.235845	0.463035	-1.02695	0.390492	4	-0.108483	POLYGON ((0.2259358178827294 0.4355035106953601, 0.2160087614895808 0.4493562211929667, 0.231952184422704 0.5163873516027899, 0.2514464982943312 0.5105647284469503, 0.2690982932088472 0.4867848497623595, 0.2389138594227899 0.4383526356869805, 0.2259358178827294 0.4355035106953601))
14	56070000	60060000	14:56070000-60050000	89	0.204455	0.470501	-1.01118	0.290114	4	-0.19142	POLYGON ((0.178853514004533 0.5166566632999547, 0.1788542036524392 0.5166535130486497, 0.1809195642700508 0.5178122493164971, 0.1857259924470389 0.5199125386363419, 0.190716967269209 0.521525962750474, 0.1958433108605712 0.5226366240088689, 0.2010545115078027 0.523233578665349, 0.2062992213703874 0.5233109447102642, 0.2115257624294181 0.522867959828055, 0.2166826356897653 0.5219089889086238, 0.22…
14	56070000	60060000	14:56070000-60050000	90	0.19668	0.434969	-1.56595	0.166497	4	-0.212051	POLYGON ((0.2065916989667239 0.388095068901241, 0.1738883989238378 0.4424499662974823, 0.1777140575632295 0.4577360911772601, 0.2160087614895808 0.4493562211929667, 0.2259358178827294 0.4355035106953601, 0.2065916989667239 0.388095068901241))
14	56070000	60060000	14:56070000-60050000	91	0.169822	0.418809	-3.66917	0.347333	3	0.125756	POLYGON ((0.2060968015954442 0.3789659840272804, 0.1970638824791398 0.3735312158964505, 0.1924111236859498 0.3710394475417494, 0.1875329997177054 0.3690242600885492, 0.182478177654452 0.3675057582512297, 0.1772970874220317 0.3664990915116301, 0.1720414186730049 0.3660143029787639, 0.1667636050997838 0.3660562291927617, 0.1615163013247819 0.3666244518726561, 0.1563518575864314 0.3677133020894027, …
14	56070000	60060000	14:56070000-60050000	92	0.15026	0.446586	-3.66917	0.431191	3	0.0440108	POLYGON ((0.1777140575632295 0.4577360911772601, 0.1738883989238378 0.4424499662974823, 0.1215444553669109 0.405586948652277, 0.1162206332513747 0.4289452508873053, 0.1176426420066719 0.4368338467572427, 0.166751350753132 0.4825793509910647, 0.1777140575632295 0.4577360911772601))
14	56070000	60060000	14:56070000-60050000	93	0.129681	0.468678	-3.66917	0.216456	3	0.207684	POLYGON ((0.166751350753132 0.4825793509910647, 0.1176426420066719 0.4368338467572427, 0.1070441933712911 0.4735428469051293, 0.1150273004468675 0.4864045803422126, 0.1665735312305932 0.4898729976895039, 0.166751350753132 0.4825793509910647))
14	56070000	60060000	14:56070000-60050000	94	0.127174	0.505934	-3.66917	0.454471	2	-0.0331201	POLYGON ((0.1698054324442959 0.5424667685627746, 0.1765562357809893 0.5247390667160069, 0.1781715471573365 0.5197718281991924, 0.178853514004533 0.5166566632999547, 0.1665735312305932 0.4898729976895039, 0.1150273004468675 0.4864045803422126, 0.1024632139480469 0.5168224928831435, 0.1698054324442959 0.5424667685627746))
14	56070000	60060000	14:56070000-60050000	95	0.113672	0.541389	-3.66917	0.153457	3	0.290233	POLYGON ((0.1458187493582176 0.5872577555295114, 0.1566339900163646 0.572155267403705, 0.1591143532487341 0.5683572535683359, 0.1612598365780578 0.5643605033707703, 0.1630546291076024 0.5601944704095424, 0.1698054324442959 0.5424667685627746, 0.1024632139480469 0.5168224928831435, 0.1008020126662604 0.5175252296112282, 0.08686479007518909 0.5450394632795706, 0.1458187493582176 0.5872577555295114))
14	56070000	60060000	14:56070000-60050000	96	0.0920418	0.571594	-3.66917	0.228655	3	0.21836	POLYGON ((0.09720765161857799 0.6271309526367775, 0.1135199438658476 0.6198741384526238, 0.1185143581181426 0.6173267505233786, 0.1232107608993887 0.6142645356547098, 0.1275562829669017 0.6107219663969041, 0.1315020050794072 0.6067389228374541, 0.1350035087000706 0.6023602436553178, 0.1458187493582176 0.5872577555295114, 0.08686479007518909 0.5450394632795706, 0.07240282851270881 0.55023890967604…
14	56070000	60060000	14:56070000-60050000	97	0.0594173	0.586108	-3.66917	0.0412992	3	0.81532	POLYGON ((0.02485979654385729 0.6292901631051314, 0.04005403018703931 0.6352741495237411, 0.04501950250908139 0.6369503994070504, 0.05012659752731132 0.6381265412042126, 0.05532507959126805 0.6387910058631532, 0.06056381412699895 0.6389372574149444, 0.06579127061939595 0.6385638572644928, 0.07095602948918456 0.6376744783411982, 0.0760072878786987 0.636277868970392, 0.08089535937130855 0.634387766…
14	56070000	60060000	14:56070000-60050000	98	0.0290288	0.57414	-3.66917	1.99996e-05	3	0.81532	POLYGON ((-0.02287257519652858 0.5838129720608251, -0.02286213987066879 0.5837892249641972, -0.02245702555706385 0.586033446409214, -0.02106551002925718 0.59095680512378, -0.01920438719533427 0.59572251580462, -0.01689110408786045 0.6002859024594079, -0.0141473465004724 0.6046041857755038, -0.01099883569514487 0.6086368841531606, -0.007475087279097178 0.6123461931989025, -0.003609134511739286 0.6…
14	56070000	60060000	14:56070000-60050000	99	0.0445697	0.54205	-3.66917	0.0904782	3	0.352937	POLYGON ((0.01303469298094015 0.4997109662572269, 0.009865697812446374 0.5022015328291336, 0.006031115251249893 0.5058969425460206, 0.002587958803797481 0.5099595463997899, -0.0004288002833507665 0.5143480815773183, -0.002988521570976031 0.5190179748656036, -0.01075896234566989 0.535063155204238, 0.05032004232177745 0.5646428033184357, 0.06692001965148658 0.5590486383336509, 0.07240282851270881 0…
14	56070000	60060000	14:56070000-60050000	100	0.0739479	0.521267	-3.66917	0.0601788	3	0.391469	POLYGON ((0.1008020126662604 0.5175252296112282, 0.04934700333511663 0.4850304509315739, 0.03759623218930387 0.4893171041382957, 0.03231003020342004 0.4935635471434999, 0.07240282851270881 0.5502389096760458, 0.08686479007518909 0.5450394632795706, 0.1008020126662604 0.5175252296112282))
14	56070000	60060000	14:56070000-60050000	101	0.0926394	0.49167	-0.943823	0.0211196	4	-0.666647	POLYGON ((0.1150273004468675 0.4864045803422126, 0.1070441933712911 0.4735428469051293, 0.05818785875886965 0.4766124973472732, 0.04934700333511663 0.4850304509315739, 0.1008020126662604 0.5175252296112282, 0.1024632139480469 0.5168224928831435, 0.1150273004468675 0.4864045803422126))
14	56070000	60060000	14:56070000-60050000	102	0.0904838	0.457362	-1.34649	0.0308594	4	-0.467584	POLYGON ((0.1162206332513747 0.4289452508873053, 0.06685327505838075 0.4517298178697958, 0.05818785875886965 0.4766124973472732, 0.1070441933712911 0.4735428469051293, 0.1176426420066719 0.4368338467572427, 0.1162206332513747 0.4289452508873053))
14	56070000	60060000	14:56070000-60050000	103	0.0778988	0.430094	-3.66917	0.281374	3	0.179543	POLYGON ((0.1204992445965532 0.3970727405370927, 0.119832538865869 0.3980194347950587, 0.1174041333710504 0.3950000654883534, 0.1137818065537474 0.3913039732458979, 0.109815301105511 0.387979941963674, 0.105542662560653 0.3850598547558864, 0.1010048727906164 0.3825717202259535, 0.09624545691811913 0.3805394038163577, 0.09131006583718926 0.3789823988984561, 0.08624603834343943 0.3779156397978914, …
14	56070000	60060000	14:56070000-60050000	104	0.0448362	0.441465	-3.66917	0.289914	3	0.154863	POLYGON ((0.04418201111172128 0.3858103805987791, 0.03151733826125791 0.3901660631239573, 0.02024151883565825 0.3921806372612528, 0.03759623218930387 0.4893171041382957, 0.04934700333511663 0.4850304509315739, 0.05818785875886965 0.4766124973472732, 0.06685327505838075 0.4517298178697958, 0.04418201111172128 0.3858103805987791))
14	56070000	60060000	14:56070000-60050000	105	0.0142342	0.446932	-1.25282	0.323514	4	-0.134288	POLYGON ((0.02024151883565825 0.3921806372612528, 0.01070645861783895 0.3938842017639587, 0.0005302218456426763 0.3934362445596693, -0.003127931642332493 0.4765384598744591, 0.008211906891221539 0.4996183628458055, 0.008252894028532062 0.4995618770337834, 0.01191037164587683 0.4997228789330997, 0.0130355794768251 0.4997102695452094, 0.01303469298094015 0.4997109662572269, 0.03231003020342004 0.49…
14	56070000	60060000	14:56070000-60050000	106	-0.0178214	0.445521	-1.44087	0.270295	4	-0.16954	POLYGON ((0.0005302218456426763 0.3934362445596693, -0.0154975999112816 0.3927307010089632, -0.02071127419545772 0.3927586580356612, -0.02589681517278596 0.3933002722057776, -0.03100374029024838 0.3943502707683731, -0.0359823323401075 0.3958984317218598, -0.03852074257532635 0.3969722289212405, -0.03852030960064495 0.3969700033657212, -0.06580191799476379 0.4310610701996758, -0.003127931642332493…
14	56070000	60060000	14:56070000-60050000	107	-0.0371729	0.47219	-3.66917	0.253895	3	0.179353	POLYGON ((-0.02984496954618284 0.5257779721486917, -0.01901053960479638 0.5218124420595792, -0.01420903944299671 0.5197811619959035, -0.009631076098965154 0.5172866171232761, -0.005321212812078965 0.5143530900739378, -0.001321403057039296 0.5110091366615324, 0.002329417843569929 0.5072873079104311, 0.005595711727144306 0.5032238331945047, 0.008211906891221539 0.4996183628458055, -0.00312793164233…
14	56070000	60060000	14:56070000-60050000	108	-0.0682705	0.483572	-0.913257	0.49057	1	0.000723857	POLYGON ((-0.08782797345588177 0.4374485826134333, -0.1000452589798097 0.4460039421439398, -0.1120331054649688 0.4686782825703772, -0.04875662245905184 0.5230655391994835, -0.03604249329947502 0.5234512423586293, -0.06910004736538572 0.4331329884273225, -0.08782797345588177 0.4374485826134333))
14	56070000	60060000	14:56070000-60050000	109	-0.0907334	0.509707	-3.66917	0.262475	2	-0.158583	POLYGON ((-0.1281747728977597 0.517895345885329, -0.06888674222915531 0.5309093026137018, -0.04875662245905184 0.5230655391994835, -0.1120331054649688 0.4686782825703772, -0.1162122162582216 0.4722162026956671, -0.1268778726091442 0.4920308029938942, -0.1281747728977597 0.517895345885329))
14	56070000	60060000	14:56070000-60050000	110	-0.0976052	0.541013	-0.803138	0.272775	4	-0.215986	POLYGON ((-0.1394503467367471 0.5394748415037625, -0.1381107160718691 0.5461715893283055, -0.09660956144215339 0.5668360687134412, -0.09573919424150885 0.5666101286836391, -0.06888674222915531 0.5309093026137018, -0.1281747728977597 0.517895345885329, -0.1394503467367471 0.5394748415037625))
14	56070000	60060000	14:56070000-60050000	111	-0.0706286	0.561303	-3.66917	0.384592	3	0.105707	POLYGON ((-0.03051104922900695 0.5992253782045718, -0.02336586841968259 0.5849355322945464, -0.02287257519652858 0.5838129720608251, -0.01871654805680537 0.5515478262224622, -0.01874753324381978 0.5516205917546594, -0.01919202447335655 0.5491985649801328, -0.02064468277116262 0.5441611469143488, -0.02258936379896786 0.5392924702358494, -0.02500692483572294 0.534640460397808, -0.02787356830440385 …
14	56070000	60060000	14:56070000-60050000	112	-0.0849189	0.589883	-3.66917	0.422632	3	0.0667069	POLYGON ((-0.1027791681909559 0.6398776130032219, -0.09781485523790384 0.6411269226343741, -0.09280751688229114 0.64213254462509, -0.08772648435693246 0.6426500593321747, -0.08261922392011239 0.6426746322093759, -0.07753344684740542 0.6422060337004905, -0.07251666371995936 0.6412486413838439, -0.06761574058763641 0.6398113990775979, -0.06287646115327064 0.6379077332879175, -0.05834309906805239 0.…
14	56070000	60060000	14:56070000-60050000	113	-0.117817	0.581604	-0.959859	0.303334	4	-0.186519	POLYGON ((-0.1381107160718691 0.5461715893283055, -0.1466562889575762 0.5668884932281963, -0.1451739612640006 0.5762215102848846, -0.1088201085864637 0.6153564481620888, -0.09660956144215339 0.5668360687134412, -0.1381107160718691 0.5461715893283055))
14	56070000	60060000	14:56070000-60050000	114	-0.141819	0.603901	-1.55401	0.386552	1	0.0744993	POLYGON ((-0.1796203444091072 0.6439594251648619, -0.1657712014424746 0.6510020524099618, -0.1608711666968632 0.6531882252478056, -0.1557746929294867 0.6548662143191549, -0.1505343278480032 0.6560187185481681, -0.1452041027660019 0.6566338549235581, -0.1398389755076853 0.6567052810195815, -0.1344942637596712 0.6562322603902592, -0.1292250747123956 0.6552196701625775, -0.1240857368718591 0.6536779…
14	56070000	60060000	14:56070000-60050000	115	-0.169517	0.589815	-3.66917	0.115338	2	-0.367979	POLYGON ((-0.2099008230218305 0.6238401168506568, -0.2093438674653352 0.624544237600437, -0.2058390912674402 0.628194763418831, -0.2020011801351261 0.6314932832518092, -0.197865334498979 0.6344095438406551, -0.1934694873757396 0.6369167979197622, -0.1796203444091072 0.6439594251648619, -0.1451739612640006 0.5762215102848846, -0.1466562889575762 0.5668884932281963, -0.1893826566476844 0.5772582842…
14	56070000	60060000	14:56070000-60050000	116	-0.177484	0.556992	-3.66917	0.0661387	2	-0.395756	POLYGON ((-0.1466562889575762 0.5668884932281963, -0.1381107160718691 0.5461715893283055, -0.1394503467367471 0.5394748415037625, -0.181221207919976 0.5289280127569972, -0.1990641962944719 0.5366726673998448, -0.2018770382404567 0.5465917465257377, -0.1893826566476844 0.5772582842003542, -0.1466562889575762 0.5668884932281963))
14	56070000	60060000	14:56070000-60050000	117	-0.212057	0.571078	-1.21081	0.417652	1	0.0657908	POLYGON ((-0.266102296670072 0.5828192608423037, -0.2580814119240126 0.5970389335239112, -0.2553727690784284 0.6013428393576379, -0.2522629554015084 0.6053664459966326, -0.2487807724361271 0.6090724888034724, -0.2449584704237438 0.612426644258524, -0.2408314496187552 0.6153978478472593, -0.2364379324289992 0.6179585817642914, -0.2318186094188814 0.6200851297695614, -0.2270162624536676 0.621757796…
14	56070000	60060000	14:56070000-60050000	118	-0.228099	0.542639	-0.54961	0.335333	4	-0.234745	POLYGON ((-0.2831364654972234 0.5360693906705362, -0.2800099287721765 0.5525103579489714, -0.2786348663206511 0.5580762972155426, -0.2766648869547186 0.5634605017029812, -0.2741231814161313 0.5685995881606962, -0.266102296670072 0.5828192608423037, -0.2018770382404567 0.5465917465257377, -0.1990641962944719 0.5366726673998448, -0.2156112980093594 0.5232283021603322, -0.2831364654972234 0.53606939…
14	56070000	60060000	14:56070000-60050000	119	-0.234352	0.509757	-3.66917	0.0754585	2	-0.435422	POLYGON ((-0.2888758065830598 0.516776805409475, -0.2851748222215218 0.5253506436500721, -0.2831364654972234 0.5360693906705362, -0.2156112980093594 0.5232283021603322, -0.2180647992126489 0.4915468846269637, -0.2222879143867072 0.4880334654057435, -0.2888758065830598 0.516776805409475))
14	56070000	60060000	14:56070000-60050000	120	-0.24637	0.481913	-3.66917	0.0348593	2	-0.73841	POLYGON ((-0.2801782704143538 0.4376189242969396, -0.2901037356871581 0.4522544660834362, -0.2928548047911878 0.4567846011728459, -0.2951382325147882 0.4615675357296362, -0.2969310471239381 0.4665551524872332, -0.2982152125494754 0.4716972750356853, -0.2989778098335147 0.47694217260626, -0.2992111670967177 0.4822370804931977, -0.2989129367189134 0.487528730877076, -0.2980861189566221 0.4927638887…
14	56070000	60060000	14:56070000-60050000	121	-0.22652	0.452642	-0.786777	0.234075	1	0.340947	POLYGON ((-0.2163606101759045 0.4008132071285345, -0.2208894134833601 0.4001013227412106, -0.2260745772665857 0.3998024012645201, -0.2312640399412277 0.400013954228574, -0.2364076671704857 0.4007339378634839, -0.2414557674244163 0.4019553965547082, -0.246359572039634 0.4036665300398203, -0.2510717063633864 0.4058508074084291, -0.255546647430379 0.4084871268039207, -0.2597411637508257 0.4115500192…
[truncated: 278 more rows]

## Sheet: ED_Fig4b_Fgf9_13.5_Male
Chr	Start	End	Region	LDBindex	LDBx	LDBy	Signal	LMIpval	LMIq	LMItype	Geometry
[truncated: 399 more rows]
