# Supplementary material for: Chromatin spatial analysis by METALoci unveils sex-determining 3D regulatory hubs
Source: Nat Struct Mol Biol. 2026 Feb 24;33(4):577–89. doi: 10.1038/s41594-026-01749-z (PMC13095655; doi:10.1038/s41594-026-01749-z)
Supplement: Supplementary file 17 — RSS for all samples. [file 41594_2026_1749_MOESM17_ESM.xlsx]

## Sheet: ED_Fig8b_Male_10.5
Gene	Coelomic Epithelium XY10.5
Onecut2(+)	0.253639
Tfap2b(+)	0.248372
Hoxa5(+)	0.244059
Hoxa11(-)	0.241565
Nr2c1(+)	0.240275
Hoxb2(-)	0.239616
Elf3(+)	0.234499
Srebf1(+)	0.234115
Alx1(+)	0.233972
Cebpd(+)	0.232955
Nr2f1(+)	0.230832
Rarb(+)	0.230759
Hoxd10(-)	0.230675
Alx3(+)	0.230063
Meis2(+)	0.229969
Myf5(+)	0.229932
Meox1(+)	0.229759
Spi1(-)	0.229518
Hoxb2(+)	0.228429
Hoxc10(+)	0.228294
Pax3(+)	0.228132
Hoxa10(-)	0.227731
Hand1(+)	0.227441
Hoxa9(+)	0.226967
Hoxc8(+)	0.226206
Maff(-)	0.2261
Klf4(-)	0.225942
Hoxc4(+)	0.225806
Lbx2(-)	0.22577
Nfia(-)	0.225656
Tbx2(-)	0.225512
Hoxa7(+)	0.225314
Mafb(+)	0.225196
Mzf1(-)	0.225073
Msx2(+)	0.224995
Gata5(+)	0.224913
Irf3(+)	0.224794
Tbx3(+)	0.22464
Mecom(+)	0.223902
Hoxb3(+)	0.22373
Tfap2b(-)	0.22322
Maf(-)	0.22318
Gata2(+)	0.22313
Hoxd9(-)	0.22274
Usf1(+)	0.222613
Elf5(+)	0.222605
Gata3(+)	0.222283
Gata4(-)	0.22227
Fli1(+)	0.222247
Hoxd10(+)	0.221996
Hand2(-)	0.221964
Hoxd12(-)	0.221929
Gli1(+)	0.221907
Jun(+)	0.221781
Jund(-)	0.221776
Hoxc9(+)	0.22176
Xbp1(+)	0.221488
Pparg(-)	0.221303
Cebpe(+)	0.221084
Meis1(+)	0.22108
Thra(-)	0.221067
Hoxb4(-)	0.221014
Junb(-)	0.220955
Nr6a1(+)	0.220805
Isl1(+)	0.220671
Pbx1(+)	0.220656
Irf8(+)	0.220578
Nfyc(+)	0.220567
Fosb(-)	0.220541
Atf4(+)	0.220448
Ascl1(+)	0.220392
Nfyb(+)	0.220372
Tlx2(-)	0.22034
Tbp(+)	0.220279
Tfap4(+)	0.220257
Fev(-)	0.220159
Lef1(+)	0.220131
Hoxa9(-)	0.219996
Etv4(+)	0.219753
Hoxa10(+)	0.21975
Pou3f3(+)	0.219719
Hoxc10(-)	0.219611
Esr1(+)	0.219562
E2f3(+)	0.219533
Hoxa4(+)	0.219519
Elf5(-)	0.219511
Ascl1(-)	0.219204
Hnf4a(+)	0.219035
Arid3a(+)	0.218876
Ebf1(+)	0.218842
Hoxd4(+)	0.218777
Rxrg(+)	0.218771
E2f8(+)	0.21874
Msx1(-)	0.218549
Nfatc2(-)	0.218543
Hes7(-)	0.218527
E2f1(+)	0.218442
E2f7(+)	0.218168
Phox2b(+)	0.218094
Gabpa(+)	0.217944
Tfdp1(+)	0.217938
Phox2b(-)	0.21792
Nfib(+)	0.217856
E2f6(+)	0.217714
Tlx2(+)	0.217632
Pou3f2(-)	0.217476
Pou2f1(+)	0.217418
Etv2(+)	0.217378
Pbx3(+)	0.217341
Pou3f4(+)	0.217258
Gata3(-)	0.217104
Erf(+)	0.217096
Ikzf1(+)	0.217039
Creb1(+)	0.216993
Nfic(+)	0.21697
Cebpa(+)	0.216803
Foxj3(+)	0.216782
Ets1(+)	0.216674
Tcf3(+)	0.216617
Emx2(+)	0.216515
Fos(-)	0.216499
Ikzf1(-)	0.216356
Atf2(+)	0.21626
Hnf4a(-)	0.216187
Hoxd9(+)	0.216148
Ar(+)	0.216022
Tal1(-)	0.216011
Elf3(-)	0.215918
Elk1(+)	0.215856
Srebf2(+)	0.215796
Sox12(+)	0.21575
Nfe2l2(+)	0.21572
Bhlha15(-)	0.215664
Wt1(+)	0.215649
Sp2(+)	0.215568
E2f1(-)	0.215537
Sox5(+)	0.215429
Rfx3(+)	0.215342
Mybl2(+)	0.215325
Eomes(-)	0.2153
Nfya(+)	0.215296
Cdx2(+)	0.215253
Tcf12(+)	0.215081
Fli1(-)	0.215055
Lhx6(-)	0.214915
Foxa2(-)	0.21485
Pou5f1(+)	0.214739
Tal1(+)	0.214565
Prdm1(+)	0.214425
Myc(+)	0.214272
Myb(+)	0.214247
Rxrg(-)	0.214226
Spi1(+)	0.214215
Crem(+)	0.213939
Rbpj(+)	0.213781
Otx2(+)	0.213671
Zbtb7a(+)	0.213582
Sox9(+)	0.213574
Rax(-)	0.213454
Klf7(+)	0.213438
Hesx1(+)	0.213422
Sox9(-)	0.213356
Pknox2(+)	0.213284
Gmeb1(+)	0.213266
Prrx1(-)	0.213218
Fos(+)	0.213081
Etv5(+)	0.213031
Nr5a1(+)	0.212997
Rorb(-)	0.212949
Mafg(+)	0.212489
Yy1(+)	0.212435
Ctcf(+)	0.21231
Erg(+)	0.212014
Lmx1b(+)	0.211892
Irf7(-)	0.211861
Tcf7l1(+)	0.211835
Dbp(+)	0.211687
Myod1(+)	0.211619
Foxa3(-)	0.211403
Ets2(+)	0.211388
Nr2f2(+)	0.211167
Six4(+)	0.211103
Sox2(+)	0.211073
Pitx2(+)	0.210957
Myf5(-)	0.210941
Hoxa13(-)	0.210839
Hoxc11(-)	0.210645
Foxo1(+)	0.210453
Zkscan1(+)	0.210433
Dlx6(-)	0.210237
Dlx2(-)	0.210086
Dmrt1(+)	0.209868
Erg(-)	0.209867
Cebpg(+)	0.209498
Nfia(+)	0.209349
Hey1(+)	0.209282
Hic1(+)	0.209162
Gata1(+)	0.208995
E2f2(+)	0.208948
Alx1(-)	0.208846
Tcf7(+)	0.208823
Gata4(+)	0.20876
Hoxd8(+)	0.20864
Etv1(+)	0.20862
Ebf1(-)	0.208038
Rora(+)	0.207774
Wt1(-)	0.207672
Gfi1b(+)	0.207594
Plagl1(+)	0.207503
Maf(+)	0.207413
Hoxa2(+)	0.20738
Nfe2l1(+)	0.207176
Elf4(+)	0.207115
Mef2c(+)	0.207087
Gata5(-)	0.206296
Nr1d1(-)	0.206128
Gli2(+)	0.205976
Nr2f2(-)	0.205939
Sox4(+)	0.205873
Cebpb(+)	0.205817
Pbx1(-)	0.205725
Rxra(+)	0.205653
Cdx2(-)	0.205575
Hey2(+)	0.205003
Gata2(-)	0.204653
Hoxa11(+)	0.204373
Jund(+)	0.204165
Nr3c1(+)	0.204126
Sox10(+)	0.204083
Nr3c2(-)	0.203853
Pitx1(+)	0.203792
Pax7(-)	0.203619
Tfap2c(+)	0.203399
Sox2(-)	0.203348
Etv5(-)	0.202494
Hoxc8(-)	0.202389
Sox15(+)	0.202382
Cux1(+)	0.202289
Ovol1(-)	0.202246
Nr5a1(-)	0.201568
Foxd3(-)	0.2014
Elf2(+)	0.201392
Srf(+)	0.201155
Nfatc1(-)	0.201102
Maff(+)	0.201098
Tcf21(+)	0.200949
Gli3(+)	0.200902
Meis1(-)	0.20008
Ets1(-)	0.200078
Fosl1(-)	0.200059
Twist1(+)	0.200055
Stat4(-)	0.20005
Atf3(+)	0.19943
Lmx1a(-)	0.199419
Fosb(+)	0.199387
Foxa1(-)	0.19895
E2f8(-)	0.198521
Pax5(-)	0.198519
Pitx3(-)	0.197838
Bach1(+)	0.197136
Myog(+)	0.196471
Hoxd11(+)	0.196466
Ovol2(+)	0.196288
Junb(+)	0.19626
Hoxc9(-)	0.196236
Tead4(-)	0.19616
Fosl2(+)	0.196128
Dlx3(+)	0.196003
E2f7(-)	0.195694
Irf5(-)	0.195632
Tfdp1(-)	0.195313
Nr2f1(-)	0.194512
Spdef(-)	0.193567
Pax1(-)	0.193072
Hes7(+)	0.192968
Runx1(-)	0.19241
Etv2(-)	0.192304
Fosl1(+)	0.192088
Tead1(+)	0.192074
Gata6(-)	0.19202
Nhlh1(+)	0.191819
Bhlhe40(-)	0.191491
Hoxb3(-)	0.191129
Ebf2(+)	0.190877
Foxa3(+)	0.190841
E2f3(-)	0.190576
Nfkb2(+)	0.190398
Hand2(+)	0.190217
Stat3(+)	0.190158
Sox17(+)	0.190104
Sp4(+)	0.190064
Snai3(+)	0.189746
Nfkb1(+)	0.189654
Hnf1a(-)	0.189042
Rel(+)	0.189016
Myf6(-)	0.189008
Alx4(-)	0.188819
Hoxd12(+)	0.188799
Pax9(+)	0.188494
Thra(+)	0.188307
Gfi1b(-)	0.188226
Cebpe(-)	0.188047
Sox11(-)	0.187917
Nr1h4(-)	0.187722
Mixl1(-)	0.187126
Prrx2(+)	0.187124
Gcm1(-)	0.186843
Stat2(+)	0.186405
Foxn3(+)	0.186174
Neurog2(+)	0.186119
Fev(+)	0.185865
Sox10(-)	0.18584
Relb(+)	0.185498
Emx1(+)	0.185035
Ovol2(-)	0.184992
Hmbox1(+)	0.184848
Thrb(+)	0.184814
Myf6(+)	0.184428
Jun(-)	0.184108
Tead4(+)	0.184023
Pax1(+)	0.183895
Ebf3(+)	0.183374
Bhlha15(+)	0.182847
Hoxd3(-)	0.182516
Irf9(+)	0.181881
Nfatc1(+)	0.18162
Klf4(+)	0.181436
Tfec(+)	0.181186
En1(-)	0.180194
Bhlhe41(+)	0.180013
Tbx5(+)	0.180011
Foxg1(-)	0.17966
Zic4(-)	0.179636
Otx2(-)	0.179286
Nfib(-)	0.178934
Hoxa13(+)	0.178443
Nfe2(+)	0.177974
Lhx1(-)	0.177907
Myod1(-)	0.177774
Jdp2(+)	0.177455
Hoxd8(-)	0.177428
Bcl6(-)	0.17696
Meis3(-)	0.176824
Irf6(-)	0.176648
Elk3(+)	0.176358
Irf7(+)	0.176235
Rfx4(+)	0.176152
Nhlh1(-)	0.175801
Hoxb13(+)	0.175727
Elf1(+)	0.175605
Nr1h4(+)	0.175415
Atoh1(-)	0.175344
Lmx1b(-)	0.175238
Tfap2c(-)	0.175138
Bhlhe40(+)	0.174964
Mitf(+)	0.174878
Gata1(-)	0.174377
Tbx3(-)	0.174105
Foxg1(+)	0.173299
Nobox(-)	0.172881
Hes5(+)	0.172345
Hoxb13(-)	0.171983
Hoxc11(+)	0.171744
Dlx4(+)	0.171471
Otx1(-)	0.171317
Esrra(+)	0.170886
Foxa1(+)	0.170189
Tbx4(+)	0.170172
Six1(+)	0.169958
Ppard(+)	0.169938
Lhx1(+)	0.169859
Mybl1(+)	0.169725
Hey2(-)	0.169718
Foxl1(+)	0.169703
Lhx2(+)	0.169681
Myb(-)	0.16961
Nfe2(-)	0.1695
Rax(+)	0.169472
Tfap2a(+)	0.169194
Gbx1(+)	0.168766
Vax2(+)	0.168633
Vdr(+)	0.168616
Ehf(-)	0.168567
Thrb(-)	0.168464
Irf2(+)	0.168376
Nr1h3(+)	0.1682
Stat6(+)	0.168132
Rxra(-)	0.168127
En2(-)	0.167949
Hnf1a(+)	0.167915
Olig1(-)	0.16774
Dlx3(-)	0.167445
Tfeb(+)	0.167445
Klf12(+)	0.167445

## Sheet: ED_Fig8b_Male_13.5
Gene	Sertoli XY13.5
Irf9(-)	0.574618
Thra(+)	0.485329
Sox9(+)	0.463255
Sox8(+)	0.447754
Sox10(-)	0.398519
Foxa3(+)	0.393105
Ets1(-)	0.382344
Mafk(+)	0.381464
Dlx3(-)	0.377971
Hoxa2(-)	0.373913
Vdr(+)	0.365056
Nr2f2(-)	0.362101
Nfil3(+)	0.350896
Hoxc8(-)	0.348417
Emx1(+)	0.345838
Mafb(-)	0.33145
Fev(+)	0.331271
Isx(+)	0.330242
Bhlhe40(+)	0.330176
Mybl1(+)	0.326568
Gata4(+)	0.319983
Elf4(+)	0.317591
Stat1(+)	0.315084
Usf1(-)	0.314239
Emx1(-)	0.308231
Foxf2(+)	0.307658
Tcf3(-)	0.305049
Rxrg(-)	0.304719
Pou3f4(-)	0.30334
Hoxb2(-)	0.302657
Etv4(-)	0.29974
Gata6(-)	0.296046
Ebf1(-)	0.295228
Nfatc3(+)	0.293694
Mxi1(+)	0.292873
Nr2f1(-)	0.291498
Meis3(-)	0.290538
Meis1(-)	0.284934
Nfib(-)	0.284399
Jund(+)	0.283111
Hoxd3(-)	0.280795
Sox17(-)	0.280651
Klf13(+)	0.280641
Fosl2(+)	0.279418
Otx1(-)	0.279171
Irf1(+)	0.277589
Rxra(+)	0.275692
Bhlhe40(-)	0.275518
Runx3(+)	0.274658
Sox3(-)	0.27437
Tbr1(-)	0.273827
Spdef(+)	0.272486
Vax2(-)	0.271313
Gata2(-)	0.269354
Wt1(+)	0.268647
Sox10(+)	0.268346
Rara(+)	0.268145
Hes1(+)	0.26782
Cebpa(-)	0.267727
Mzf1(-)	0.26752
Lhx5(+)	0.267445
Junb(+)	0.267047
Bhlhe41(-)	0.266962
Thrb(+)	0.266734
Sox13(+)	0.26642
Foxk2(+)	0.26558
Cebpb(+)	0.265146
Maff(+)	0.265045
Irf8(+)	0.264064
Egr1(+)	0.263601
Sox5(+)	0.260962
Foxa1(-)	0.260708
Nfyb(-)	0.260098
Myc(+)	0.259496
Npas2(-)	0.25854
Tead1(+)	0.258166
Lhx9(-)	0.257095
Etv6(+)	0.256373
Pbx1(-)	0.256115
Elf2(+)	0.255318
Msx1(-)	0.255046
Bhlhe41(+)	0.254047
Etv5(+)	0.253577
Mnt(+)	0.253491
Lbx2(+)	0.252645
Tbx2(-)	0.252046
Nfib(+)	0.251295
Bhlhe22(-)	0.250619
Isx(-)	0.250431
Mitf(+)	0.250284
Ets2(+)	0.250216
Nfe2l1(+)	0.249908
Tcfl5(-)	0.249759
Nfkb2(+)	0.249661
Fosl1(-)	0.24918
Arntl(+)	0.248547
Irf8(-)	0.24847
Hoxa10(-)	0.248454
Rax(-)	0.248205
Sp9(-)	0.248173
Pparg(-)	0.247895
Elk4(+)	0.247894
Isl1(-)	0.247476
Sox17(+)	0.24742
Isl1(+)	0.246853
Vezf1(-)	0.245877
Usf2(+)	0.245866
Elf1(+)	0.245668
Gata5(-)	0.245658
Pou5f1(-)	0.245239
Pitx3(+)	0.245232
Fos(+)	0.245187
Pitx1(-)	0.245092
Ikzf1(+)	0.244963
Hic1(+)	0.244823
Irf2(+)	0.244755
Yy1(+)	0.244667
Gata6(+)	0.244208
Lmx1b(-)	0.243985
Elk3(-)	0.243607
Runx1(+)	0.243532
Pou3f3(+)	0.243309
Atoh7(-)	0.243263
Lhx4(-)	0.243254
Runx1(-)	0.243081
Nfkb1(+)	0.24306
Lhx5(-)	0.242917
Hoxb13(-)	0.242755
Nfia(+)	0.242714
Nfe2l2(+)	0.242518
Otx2(-)	0.242503
Erg(+)	0.242197
Shox2(-)	0.241816
Hic1(-)	0.241811
Tfeb(+)	0.241225
Fosb(+)	0.241137
Nfe2(-)	0.240731
Sox15(+)	0.240701
Lhx6(-)	0.24066
Mafg(+)	0.24058
Egr4(+)	0.240347
Myb(+)	0.240317
Pou3f2(-)	0.240221
Mixl1(-)	0.240207
Cebpa(+)	0.24007
Tcf12(-)	0.239906
Jun(-)	0.23989
Prdm1(-)	0.239614
Bach1(+)	0.239573
Foxj2(+)	0.239526
Trps1(+)	0.239266
Hoxa13(-)	0.238945
Ebf1(+)	0.238754
Jun(+)	0.238724
Pax7(-)	0.238679
Foxo4(+)	0.238679
Tfec(+)	0.238409
Gcm1(-)	0.238027
Etv1(+)	0.237913
Foxo1(+)	0.237232
Hoxd10(-)	0.237138
Maf(+)	0.237098
E2f1(-)	0.237045
Fos(-)	0.236775
Srebf2(+)	0.236728
E2f7(+)	0.236658
Maz(+)	0.236535
Max(+)	0.236505
Hes7(-)	0.23627
Eomes(-)	0.236256
E2f6(+)	0.235954
Bach2(+)	0.235651
Runx3(-)	0.235513
Onecut2(-)	0.235187
Dlx2(-)	0.235031
Nr3c1(+)	0.235029
Stat5a(+)	0.234925
Hnf1b(+)	0.234883
Thrb(-)	0.234683
Atf2(+)	0.234606
Tal1(-)	0.234512
Nfya(+)	0.234492
E2f8(+)	0.234367
Tcf4(+)	0.234213
Hesx1(+)	0.234207
Nr3c1(-)	0.234188
Zfx(+)	0.233945
Klf7(+)	0.233913
Gfi1b(+)	0.233911
Sp5(+)	0.233908
Foxp2(-)	0.233875
E2f2(+)	0.233854
Zfp42(-)	0.233601
Pou5f1(+)	0.233513
Erg(-)	0.233445
Lhx8(-)	0.233398
Gmeb1(+)	0.233369
Zbtb7a(+)	0.233316
Barhl2(-)	0.233008
Pou4f1(+)	0.232959
Elk1(+)	0.232903
Gata1(-)	0.232899
Foxa2(+)	0.232816
Hand1(+)	0.232779
Mzf1(+)	0.232724
Pbx3(+)	0.23258
Cebpg(+)	0.232547
Spdef(-)	0.232537
Gata3(-)	0.232494
Cebpb(-)	0.232263
Tfdp1(-)	0.232212
Elk3(+)	0.232023
Thap11(+)	0.232015
Ets1(+)	0.232001
Tcf12(+)	0.231881
Pitx1(+)	0.231796
Phox2b(-)	0.23164
Ascl1(+)	0.231498
Tgif1(+)	0.231453
Tfap2a(-)	0.231331
E2f3(+)	0.231276
Tfdp1(+)	0.231169
Cux1(+)	0.230957
Gata1(+)	0.230803
Nobox(-)	0.230453
Pax2(-)	0.230403
Hsf1(+)	0.230122
Etv4(+)	0.22981
Nr1d1(-)	0.22977
Gata2(+)	0.229687
Fli1(+)	0.229239
Hoxa7(+)	0.229227
Tcf7l2(+)	0.229225
Etv2(+)	0.229208
Myod1(+)	0.228879
Rfx2(+)	0.228791
Creb1(+)	0.228622
Hoxa10(+)	0.228608
Gabpa(+)	0.228543
Foxa1(+)	0.228531
Sox11(+)	0.228313
Tal1(+)	0.228146
Relb(+)	0.227993
Foxo1(-)	0.227798
E2f1(+)	0.227601
Tcf3(+)	0.227461
Phox2a(-)	0.227028
Usf1(+)	0.226765
Nfyc(+)	0.226743
Hoxc8(+)	0.22668
Hoxb13(+)	0.226527
Msx2(+)	0.2265
Tead2(+)	0.226423
Junb(-)	0.226358
Hand2(+)	0.226285
Plagl1(-)	0.226101
Nfic(+)	0.226
Nr1h4(-)	0.225539
Meis1(+)	0.22545
Etv5(-)	0.225255
Hand2(-)	0.22516
Nfyb(+)	0.225124
Mafb(+)	0.225116
Elf5(+)	0.225097
Spi1(+)	0.224843
Nr2f2(+)	0.224728
Elf5(-)	0.22472
Thap11(-)	0.224621
Tlx2(-)	0.22438
Hand1(-)	0.224268
Atf6(+)	0.224239
Maff(-)	0.224171
Pbx2(+)	0.223938
Cebpd(-)	0.223193
Tfap2a(+)	0.223069
Tead4(-)	0.222911
Foxa2(-)	0.222907
Ikzf1(-)	0.222842
Olig3(+)	0.22249
Tfap4(+)	0.222433
Tead4(+)	0.222432
Pou3f1(+)	0.22236
Tfap2c(+)	0.222095
Hnf4a(+)	0.221741
Nfix(+)	0.221591
Cdx2(+)	0.221452
Foxo6(-)	0.221279
Etv1(-)	0.220704
Etv2(-)	0.220007
Alx1(+)	0.219753
Hoxb5(+)	0.219515
Nfe2l1(-)	0.219494
Rfx4(+)	0.219418
Pbx1(+)	0.219243
Hoxd12(-)	0.219013
Hoxd12(+)	0.218639
Foxl1(-)	0.218276
Elf3(+)	0.218271
Mafk(-)	0.218228
Ets2(-)	0.217945
Zbtb12(+)	0.217218
Zfp57(+)	0.217037
Cebpe(-)	0.216823
Nfkb2(-)	0.216773
Hnf4a(-)	0.216638
Tlx2(+)	0.216529
Ehf(-)	0.216499
Jund(-)	0.216459
Myb(-)	0.216421
Hnf1a(-)	0.215835
Rarb(+)	0.215815
Gata4(-)	0.215613
Stat1(-)	0.215528
Maf(-)	0.215401
Isl2(+)	0.215359
Dlx3(+)	0.215271
Hes7(+)	0.215224
Gata3(+)	0.215191
Gfi1b(-)	0.215037
Wt1(-)	0.214772
Nfia(-)	0.214666
Fli1(-)	0.214497
Olig1(-)	0.214394
Hoxb2(+)	0.213958
Irf7(-)	0.213927
Sox8(-)	0.213883
Nfe2(+)	0.213706
Gbx1(-)	0.213584
Rfx3(+)	0.213224
Dlx2(+)	0.212833
Ovol2(-)	0.212539
Cebpe(+)	0.212362
Nr1h4(+)	0.212171
Gbx1(+)	0.212079
Sox3(+)	0.211945
Hoxa5(-)	0.211941
Thra(-)	0.211746
E2f3(-)	0.211599
E2f8(-)	0.211489
Atf1(-)	0.210801
Hoxa1(+)	0.210311
Sp2(+)	0.210054
Lhx2(+)	0.209477
Dbp(-)	0.208447
Mafg(-)	0.207703
Arid3a(-)	0.20719
Hoxc4(+)	0.207183
Dlx1(+)	0.207145
Myf5(-)	0.206415
Fosl2(-)	0.206209
Pax7(+)	0.206172
Foxc1(-)	0.206018
Pou2f1(+)	0.205883
Dlx5(+)	0.205806
Myf6(-)	0.205652
Gsc(+)	0.20507
Irf5(-)	0.205019
Sp1(-)	0.204276
Dmrt1(-)	0.204264
Irf6(-)	0.204197
Hoxb3(-)	0.203994
Otx1(+)	0.203498
Lhx1(-)	0.20347
Dmrt3(+)	0.203321
Mybl1(-)	0.203076
Creb5(-)	0.202984
Rax(+)	0.202518
Hoxa13(+)	0.200256
Myc(-)	0.199682
Zscan29(+)	0.199341
Tfap2c(-)	0.199301
Olig3(-)	0.199168
Rfx5(+)	0.19912
Prdm5(+)	0.198823
Gcm1(+)	0.198795
Pou3f1(-)	0.198767
Pknox2(+)	0.19859
Mxi1(-)	0.198369
Nr5a1(-)	0.197965
Myf5(+)	0.197191
Hoxc10(+)	0.197073
Foxb1(-)	0.196578
Egr1(-)	0.196355
Nfatc1(+)	0.196248
Arnt2(+)	0.195654
E2f7(-)	0.195579
Fosl1(+)	0.194963
Rxrg(+)	0.194799
Mga(-)	0.19474
Tgif1(-)	0.192502
Esx1(+)	0.192389
Sox15(-)	0.191867
Elf1(-)	0.191755
Dbp(+)	0.191569
Pax3(+)	0.191035
Sox9(-)	0.190102
Alx4(+)	0.18988
Tcf21(+)	0.189116
Pbx2(-)	0.188424
Lhx4(+)	0.18817
Pax5(+)	0.187967
Foxd2(-)	0.186895
Ahr(+)	0.186427
Onecut3(+)	0.185737
Lbx2(-)	0.185663
Foxd3(+)	0.185247
Sp4(+)	0.185191
Zbtb14(+)	0.184518
En2(+)	0.184311
Elf4(-)	0.183475
Hoxd3(+)	0.183321
Esrrb(-)	0.182187
Tfeb(-)	0.181737
Pou2f1(-)	0.181302
Irf2(-)	0.181191
Pparg(+)	0.180779
Dlx6(+)	0.180553
Bach2(-)	0.180079
Foxo4(-)	0.1799
Myog(-)	0.179217
Gbx2(-)	0.178685
Stat6(+)	0.178616
Shox2(+)	0.178365
Irf6(+)	0.177979
Atf3(-)	0.177966
Foxg1(+)	0.177787
Irf3(-)	0.177682
Ar(-)	0.177056
Foxb1(+)	0.176819
Rxra(-)	0.176747
Stat4(-)	0.176618
Foxa3(-)	0.176551
Gata5(+)	0.176328
Irf7(+)	0.176187
Vdr(-)	0.175255
Zeb1(-)	0.175243
Foxd2(+)	0.175038
Myf6(+)	0.174186
Pax9(-)	0.173811
Hoxa5(+)	0.173545
Myod1(-)	0.173441
Hmx1(-)	0.173243
Esrrg(+)	0.17317
Yy1(-)	0.17302
Six1(+)	0.172828
Nfatc1(-)	0.172737
Ehf(+)	0.172645
Creb3l4(-)	0.172519
Tbx5(-)	0.172423
Mlxipl(+)	0.172344
Twist1(+)	0.172153
Gli1(+)	0.172079
Stat6(-)	0.171667
Lhx6(+)	0.170879
E2f2(-)	0.17072
Hnf1a(+)	0.170644
Esr2(+)	0.170523
Irf1(-)	0.170315
Lmx1a(+)	0.170234
Sox6(-)	0.170194
Foxk1(+)	0.170101
Alx3(+)	0.169966
Tcf7l1(-)	0.169744
Otx2(+)	0.169674
Pbx3(-)	0.169556
Sox18(+)	0.169526
Nr3c2(+)	0.169463
Elf3(-)	0.169459
Nfatc4(-)	0.169413
Vax2(+)	0.16935
Hoxd8(-)	0.169142
Creb3l2(-)	0.169141
Grhl1(-)	0.168931
Cdx2(-)	0.168793
Ppara(-)	0.168662
Figla(-)	0.168579
Egr2(-)	0.168247
Gsc2(-)	0.168197
Tfec(-)	0.168086
Prrx2(-)	0.168074
Meox1(+)	0.1677
Elk1(-)	0.167688
Ascl1(-)	0.167445
Spi1(-)	0.167445
Nr1h3(-)	0.167445

## Sheet: ED_Fig8b_Female_10.5
Gene	Coelomic Epithelium XX10.5
Foxo6(+)	0.2286
Hoxa7(-)	0.220516
Irf5(+)	0.216513
Alx3(+)	0.215495
Rxrg(+)	0.210314
Meox1(-)	0.209919
Prrx1(-)	0.209798
Cebpd(+)	0.208033
Olig1(-)	0.206925
Hoxc11(+)	0.206324
Hoxb2(-)	0.205219
Hoxb7(-)	0.204973
Hoxa11(+)	0.204369
Pax1(+)	0.204125
Alx1(+)	0.203274
Rarb(+)	0.203017
Hoxb8(-)	0.202801
Hoxb4(-)	0.202774
Hnf4a(+)	0.20276
Hoxc10(+)	0.202161
Hes1(-)	0.201689
Tbx18(+)	0.201604
Tfap2b(-)	0.201154
Hoxb6(-)	0.200802
Hoxb5(+)	0.200777
Thra(-)	0.200748
Hoxa2(+)	0.200634
Meox1(+)	0.200601
Nfya(+)	0.200499
Hoxc4(+)	0.20031
Cebpe(+)	0.200125
Tbx3(+)	0.200083
Tbx5(+)	0.199964
Hoxa5(+)	0.199949
Tfap4(+)	0.199913
Hoxc9(+)	0.199875
Hoxb4(+)	0.199859
Hoxc8(+)	0.199801
Tlx1(+)	0.199741
Foxp1(+)	0.199647
Hoxb7(+)	0.199427
Maf(-)	0.199378
Myog(+)	0.199351
Elf3(+)	0.199246
Nfia(-)	0.199092
Maff(-)	0.19905
Hoxb2(+)	0.199047
Gata6(+)	0.199046
Gata5(+)	0.19899
Hoxa7(+)	0.198825
Myod1(+)	0.198806
Hnf1b(+)	0.198796
Myf6(+)	0.19858
Isl1(-)	0.198489
Pax2(-)	0.198439
Hoxa9(+)	0.198313
Osr1(+)	0.198184
Pou3f2(-)	0.198175
Gata2(+)	0.198161
Irf3(+)	0.198115
Hoxd9(-)	0.198002
Junb(-)	0.19787
Tead4(+)	0.197739
Fli1(+)	0.197587
Spi1(+)	0.197491
Tfap2a(+)	0.197403
Tbp(+)	0.197299
Tcf7l2(+)	0.197088
Hoxb6(+)	0.196875
E2f3(+)	0.196865
Sox2(-)	0.196798
Gabpa(+)	0.196762
Gata3(-)	0.19673
Arid3a(+)	0.196609
Hoxa4(+)	0.196567
Jun(+)	0.196564
E2f7(+)	0.19649
E2f8(+)	0.196483
Hoxa10(-)	0.196462
E2f6(+)	0.196439
Pbx1(+)	0.19643
Hoxa10(+)	0.196426
Emx2(-)	0.196405
Thrb(-)	0.196333
Ebf1(+)	0.196256
Tead2(+)	0.196243
Gata4(-)	0.196213
Hoxd4(+)	0.1962
Gfi1b(+)	0.196192
Creb1(+)	0.196161
Nr1d1(-)	0.196085
Cebpe(-)	0.196046
Etv4(+)	0.196038
Etv2(+)	0.196025
Mafb(+)	0.195918
Glis3(-)	0.195719
Ets1(+)	0.195688
E2f2(+)	0.195676
Tfdp1(+)	0.195551
Atf4(+)	0.195538
Ascl1(+)	0.19535
Atf2(+)	0.195334
Tal1(-)	0.195327
Tcf4(+)	0.19525
Twist1(+)	0.195185
Sox10(+)	0.195169
Fos(-)	0.195151
Nfic(+)	0.195056
Hoxc10(-)	0.195049
E2f8(-)	0.195047
Sp2(+)	0.195016
E2f1(+)	0.195012
Rxrg(-)	0.194864
Nfe2(+)	0.194825
Thrb(+)	0.194762
Patz1(+)	0.194685
Bach1(+)	0.194685
Pou2f1(+)	0.194639
Neurog2(+)	0.194637
Sox12(+)	0.194603
Mybl2(+)	0.194569
Tlx2(+)	0.194543
Pou5f1(-)	0.194518
Hand2(-)	0.194511
Ctcf(+)	0.194506
Gata1(+)	0.194454
Rxrb(+)	0.194392
Cebpg(+)	0.194307
Ehf(-)	0.194302
Yy1(+)	0.194277
Dbp(+)	0.194216
Thap11(+)	0.194106
Ets1(-)	0.194087
Pknox1(+)	0.194056
Max(+)	0.194012
Sox2(+)	0.194008
Klf7(+)	0.193894
Etv5(+)	0.193845
Cdx2(+)	0.193845
Elf1(+)	0.19383
Gcm1(-)	0.193824
Crem(+)	0.193821
Fosb(-)	0.193817
Pbx3(+)	0.1938
Pou5f1(+)	0.193798
Lhx5(-)	0.193797
Nfib(+)	0.193777
Elk1(+)	0.193768
Nr3c1(+)	0.193754
Ikzf1(+)	0.193738
Etv5(-)	0.193635
Sox18(+)	0.193609
Hoxc9(-)	0.193477
Nfyc(+)	0.193442
Tal1(+)	0.193436
Gata3(+)	0.193417
Stat5a(+)	0.193387
Dlx6(-)	0.193342
Tlx2(-)	0.193294
Lmx1b(-)	0.193286
Sox4(+)	0.193241
Msx3(-)	0.193109
Hoxb8(+)	0.19298
Spi1(-)	0.192968
Tfap2c(-)	0.192768
Rest(+)	0.192747
Myf5(-)	0.192711
Foxa1(-)	0.19263
Mafg(+)	0.192618
Zfx(+)	0.192609
Erg(-)	0.192597
Pou3f1(-)	0.192533
Hoxd10(+)	0.192396
Hoxb9(+)	0.192366
Rela(+)	0.19228
Emx1(-)	0.192121
Elf2(+)	0.192108
Gata2(-)	0.191841
Hoxd3(-)	0.191832
Hoxa9(-)	0.191807
Pax7(-)	0.191737
Stat4(-)	0.191597
Foxo1(+)	0.191537
Jund(+)	0.19144
Irf8(+)	0.191432
Tfeb(+)	0.191422
Esrra(+)	0.191341
Tcf12(+)	0.19124
Foxl1(+)	0.191176
Nfat5(+)	0.190939
Hey2(+)	0.190749
Plagl1(+)	0.190738
Sox10(-)	0.190712
Fli1(-)	0.190644
Hoxd9(+)	0.190585
Trps1(+)	0.190385
Mzf1(-)	0.190383
E2f1(-)	0.190331
Zbtb7a(+)	0.190252
Cebpa(-)	0.190206
Etv6(+)	0.190155
Erg(+)	0.189941
Npas2(-)	0.189928
Hoxc8(-)	0.189647
Cebpd(-)	0.189577
Pbx1(-)	0.189536
Cebpa(+)	0.189467
Klf2(+)	0.189373
Wt1(-)	0.189334
Hoxa13(-)	0.189332
Emx2(+)	0.189236
Dlx1(-)	0.189184
Fosl2(+)	0.188962
Myb(+)	0.188933
Esrrg(-)	0.188821
Tbr1(+)	0.18868
Myc(+)	0.188608
Fosl1(-)	0.188589
Nfe2l2(+)	0.188461
Egr1(+)	0.18822
Maf(+)	0.188108
Sox13(+)	0.18795
Elf5(+)	0.187876
Meis1(-)	0.187587
Hand2(+)	0.187559
Foxp1(-)	0.187311
E2f7(-)	0.187294
Atf3(+)	0.187222
Gata4(+)	0.187045
Fos(+)	0.18701
Nr2f2(+)	0.186859
Foxa3(-)	0.186842
Nfe2l1(+)	0.186813
Fosb(+)	0.186808
Lhx3(-)	0.186682
Rfx4(-)	0.186606
Klf4(+)	0.186599
Prrx1(+)	0.186541
Otx2(+)	0.186535
Hoxa11(-)	0.18636
Pax5(-)	0.186259
Nr1h4(-)	0.186208
Glis2(+)	0.186097
Nr2f2(-)	0.186011
Foxc2(+)	0.185996
Usf1(-)	0.185976
Junb(+)	0.185911
Nr2e3(+)	0.185845
Hoxc11(-)	0.185828
Gata5(-)	0.185517
Sox15(-)	0.185024
Hnf1b(-)	0.184618
Gfi1b(-)	0.184517
Mybl1(+)	0.184501
Lhx9(-)	0.18441
Nr5a1(-)	0.184391
Foxn3(+)	0.184153
Bhlhe40(+)	0.184017
Ascl1(-)	0.183531
Srebf1(+)	0.183343
Alx3(-)	0.183285
Prdm1(+)	0.182863
Hnf4a(-)	0.182596
Tfap2c(+)	0.182529
Nfyb(+)	0.182521
Hsf2(+)	0.182411
Pax1(-)	0.181929
Gli1(+)	0.181234
Dlx4(-)	0.181187
Nr2f1(-)	0.181037
Hoxa6(+)	0.180827
Sox3(+)	0.18073
Hic1(+)	0.180626
Ascl2(-)	0.180483
Foxg1(-)	0.180416
Cebpb(+)	0.180335
Gata6(-)	0.180244
Tfcp2l1(-)	0.179798
Otx1(-)	0.179705
Cdx2(-)	0.179689
Hoxb13(+)	0.179619
Foxa3(+)	0.179354
Foxo3(+)	0.179308
Zeb1(+)	0.17912
Fev(+)	0.178729
Pax9(+)	0.178505
Rel(+)	0.178483
Sox9(+)	0.17804
Tcf7l1(+)	0.177751
Etv2(-)	0.177627
Hes7(+)	0.177518
Thra(+)	0.177387
Relb(+)	0.177151
Nhlh1(+)	0.176995
Gata1(-)	0.176945
Tlx1(-)	0.176927
Lmx1b(+)	0.176685
Hoxd12(-)	0.176425
Rax(+)	0.176083
Sox11(-)	0.175689
Hoxa13(+)	0.175586
En2(-)	0.175517
Bhlha15(+)	0.175378
Etv1(+)	0.175243
Rax(-)	0.17489
Maff(+)	0.174851
Foxl2(+)	0.174714
Pax3(+)	0.174646
Dlx2(-)	0.174428
Eomes(+)	0.174395
Spdef(-)	0.174212
Rora(+)	0.174193
Vdr(+)	0.174183
Dlx3(+)	0.174105
Nfkb1(+)	0.17399
Bcl6(-)	0.173951
Nfkb2(+)	0.173714
Sox21(-)	0.173704
Hoxb13(-)	0.173498
Ikzf1(-)	0.173248
Pitx3(-)	0.173198
Esx1(+)	0.172955
Nr1h4(+)	0.172948
Cux2(+)	0.172915
Prrx2(+)	0.172774
Ets2(+)	0.172737
Elk3(+)	0.172653
Mixl1(-)	0.172503
Tcf7(-)	0.172175
Rfx5(+)	0.171939
Alx4(-)	0.171908
Foxd3(-)	0.171814
Zbtb18(+)	0.171018
Fev(-)	0.170914
Smad3(+)	0.170834
Foxa2(+)	0.170811
Hnf1a(-)	0.170636
Ovol2(+)	0.170516
Bach2(+)	0.170506
Jdp2(+)	0.170438
Zbtb7b(+)	0.17038
Atoh1(-)	0.170353
Six3(-)	0.170323
Stat2(+)	0.170262
Vax2(+)	0.169645
Mxi1(+)	0.169256
Gsc2(+)	0.168861
Mitf(+)	0.16885
Ovol2(-)	0.168781
Irf2(+)	0.168359
Pitx3(+)	0.168259
Creb3(-)	0.16822
Hoxa1(+)	0.168164
Sox15(+)	0.168059
Isl2(+)	0.168053
Klf4(-)	0.167993
Stat4(+)	0.167868
Hmx3(-)	0.167821
Fosl1(+)	0.167705
Dlx3(-)	0.167615
Otx1(+)	0.167445
Tgif1(-)	0.167445
Nr2c1(+)	0.167445
Rxra(-)	0.167445
Msx3(+)	0.167445
Hesx1(-)	0.167445
Rxra(+)	0.167445
Pax5(+)	0.167445
Ehf(+)	0.167445

## Sheet: ED_Fig8b_Female_13.5
Gene	Granulosa XX13.5
Isx(-)	0.519448
Esr1(-)	0.505589
Ppara(+)	0.505331
Foxl2(+)	0.496532
Meis1(-)	0.4732
Bhlhe41(+)	0.435526
Dbp(+)	0.43136
Smad3(+)	0.426592
Pbx1(-)	0.411822
Hes7(+)	0.402016
Rarb(-)	0.401842
Nr2f2(-)	0.397452
Irf7(-)	0.386189
Elk3(-)	0.384636
Bach2(-)	0.381964
Hes1(+)	0.379929
Usf1(-)	0.375874
Twist2(-)	0.368745
Hey1(+)	0.367452
Tcf3(-)	0.363544
Elk4(+)	0.361882
Ets1(-)	0.359338
Ebf1(-)	0.35706
Sox9(+)	0.356505
Gata4(+)	0.346238
Twist1(-)	0.345081
Nr2f1(-)	0.344901
Runx1(+)	0.338625
Bhlhe40(-)	0.338104
Nr1h4(+)	0.33753
Elf4(+)	0.33478
Foxg1(+)	0.334349
Nr2e3(-)	0.333612
Cebpd(+)	0.32971
Cebpb(+)	0.329476
Myb(+)	0.328601
Hoxd4(+)	0.327783
Ppara(-)	0.327476
Cebpa(+)	0.325609
Elf1(+)	0.3253
Stat6(+)	0.323051
Atf3(-)	0.321161
Hic1(-)	0.318786
Maff(-)	0.318317
Nr3c1(-)	0.31764
Pitx3(+)	0.315929
Thap11(-)	0.31444
Wt1(+)	0.313498
Irf8(+)	0.313198
Six2(-)	0.310124
Zbtb7a(+)	0.310074
Tcf12(+)	0.309583
Nfatc1(+)	0.309466
Hoxc11(-)	0.309363
Mafk(-)	0.308846
Klf4(+)	0.30817
Foxp1(-)	0.306621
Tfap2a(-)	0.306317
Pou5f1(-)	0.305845
Zfp42(-)	0.305828
Etv4(+)	0.305713
Nfia(+)	0.305081
Gata1(+)	0.304401
Cebpe(-)	0.304264
Sox2(-)	0.303899
Rfx5(+)	0.302545
Fli1(-)	0.301727
Rela(+)	0.30161
Gata3(+)	0.30139
Rfx5(-)	0.301293
Nr5a1(+)	0.301058
Nfatc2(+)	0.300082
Junb(+)	0.298871
Klf9(+)	0.298764
Rfx1(-)	0.298762
Tcf21(+)	0.29859
Pou3f1(+)	0.298298
Rara(+)	0.298111
Hoxc11(+)	0.298041
Srebf1(-)	0.297892
Thra(+)	0.297742
Ascl1(-)	0.297694
Hand1(+)	0.297567
Sox10(-)	0.297393
Erg(+)	0.29693
Spi1(+)	0.29675
Rxra(+)	0.29666
En1(-)	0.296219
Cdx2(-)	0.296172
Elf3(+)	0.296142
Nr1h3(+)	0.295794
Vdr(+)	0.295764
Rxrg(+)	0.295752
Lef1(+)	0.295037
Myc(+)	0.295
Cdx2(+)	0.29481
Pou6f1(+)	0.294222
Mzf1(-)	0.29342
Rfx4(-)	0.293333
Pax3(-)	0.293158
Eomes(-)	0.293051
Hand2(+)	0.292576
Sox5(+)	0.29242
Foxa3(+)	0.291895
Klf7(+)	0.291489
Sox15(-)	0.291427
Thra(-)	0.291052
Foxl1(+)	0.290992
Relb(+)	0.290937
Atf3(+)	0.290935
Foxj3(+)	0.290648
Hoxa13(-)	0.290544
Ascl2(+)	0.290245
Irf1(+)	0.290146
Maf(-)	0.289972
Otx2(-)	0.289594
Egr1(+)	0.289561
Nhlh1(-)	0.289405
Ets1(+)	0.289396
Pou3f2(-)	0.289279
Hnf4a(+)	0.289143
Pou3f1(-)	0.289041
Nfix(-)	0.288908
Bhlhe40(+)	0.28888
Jun(+)	0.288815
Myod1(-)	0.288679
Elk1(+)	0.288572
Tfeb(+)	0.288432
Usf1(+)	0.28843
Atf2(+)	0.288349
Klf4(-)	0.288095
Hoxb8(-)	0.288085
Onecut2(+)	0.287932
Nfic(+)	0.287842
Hsf1(+)	0.287632
Ikzf1(+)	0.287453
Tbx4(-)	0.287266
Atf1(+)	0.287207
Nfe2(+)	0.287156
Pou5f1(+)	0.286769
Cebpb(-)	0.286654
Sox9(-)	0.286477
Max(+)	0.285529
Rxrg(-)	0.285433
Tcf4(+)	0.285429
Rxrb(+)	0.285222
Hnf1b(+)	0.285209
Crem(+)	0.285115
Spi1(-)	0.285006
Elk3(+)	0.284929
Hey2(-)	0.284826
Ets2(-)	0.28463
Pax9(-)	0.284531
Nfib(+)	0.284444
Yy1(+)	0.284434
Figla(-)	0.284383
Foxj2(+)	0.284295
E2f1(-)	0.28429
Gata2(+)	0.284116
Foxa2(-)	0.284055
Tal1(+)	0.284026
Sox2(+)	0.283724
Irf5(+)	0.283628
Arx(+)	0.283318
Hic1(+)	0.283318
E2f6(+)	0.283147
Tbx3(+)	0.282869
Tal1(-)	0.282776
Tfap2c(+)	0.282707
Myf5(+)	0.282099
Myf6(+)	0.282034
Arid3a(+)	0.281956
Hoxb2(-)	0.281588
Mafb(+)	0.281514
E2f1(+)	0.281255
Maf(+)	0.280814
Atf4(+)	0.279937
Hmbox1(+)	0.279762
Pbx1(+)	0.279741
Nfyc(+)	0.279607
Etv2(+)	0.279607
Nfe2l1(+)	0.278837
Jund(-)	0.278828
Foxd3(-)	0.278825
Otx1(-)	0.278798
Hnf4a(-)	0.2786
Jund(+)	0.278378
Sox12(+)	0.277972
Erg(-)	0.277931
Batf3(-)	0.277594
Foxc1(+)	0.277504
Zbtb12(+)	0.277405
Elf4(-)	0.277156
Etv1(+)	0.277145
Rax(-)	0.276736
Runx3(-)	0.276688
Pknox2(-)	0.276479
Nfyb(+)	0.276411
Etv1(-)	0.27626
Ascl1(+)	0.27616
Fosl1(-)	0.276144
Foxo1(+)	0.276099
Tbp(+)	0.275968
Sox11(+)	0.275716
Tfdp1(+)	0.275685
Onecut2(-)	0.275626
Runx3(+)	0.275516
Smad4(+)	0.275489
Foxa3(-)	0.274671
Nr3c1(+)	0.27465
Elf3(-)	0.27453
Insm1(-)	0.274362
Dlx6(-)	0.274276
Srebf2(+)	0.273968
Dlx2(-)	0.273843
Mafg(+)	0.273816
Etv5(+)	0.273704
Foxl2(-)	0.273416
Jun(-)	0.272974
Mxi1(-)	0.272748
Gata3(-)	0.272654
Esx1(+)	0.272622
Nr2f1(+)	0.272599
Fosb(-)	0.272361
Atf7(+)	0.272243
Irf2(+)	0.272168
Otx2(+)	0.272162
Pou2f1(+)	0.271954
Klf10(+)	0.271635
Ikzf1(-)	0.271364
Sox4(-)	0.271282
Creb5(+)	0.2711
Pitx1(+)	0.270509
Rel(-)	0.269986
Fli1(+)	0.269788
Gmeb1(+)	0.269386
Tcf7l1(+)	0.268345
Twist2(+)	0.26829
E2f3(+)	0.268049
Hoxa13(+)	0.267758
Hnf1a(+)	0.267414
E2f8(+)	0.26702
Lmx1a(-)	0.266815
Stat1(+)	0.266785
Gata2(-)	0.266234
Pparg(+)	0.266113
Tfap4(+)	0.266078
Nfatc1(-)	0.266044
Clock(+)	0.26604
Gabpa(+)	0.266024
Myb(-)	0.26586
Dlx4(-)	0.265828
Pax6(-)	0.265632
Cebpg(+)	0.265352
Hoxb6(+)	0.265293
Rarg(+)	0.265209
Etv4(-)	0.265013
Hoxb3(+)	0.264989
Elf5(+)	0.26473
Hoxc9(+)	0.264299
Pax7(-)	0.264017
Creb1(+)	0.263965
Patz1(+)	0.263787
Dmrtc2(+)	0.263386
E2f7(+)	0.263283
Hoxb2(+)	0.262859
Nfia(-)	0.262404
Hoxb13(-)	0.2623
Tbx20(+)	0.262214
Tead4(+)	0.261921
Pou6f2(-)	0.26046
Gbx1(-)	0.260361
Etv3(+)	0.258899
Fos(-)	0.258555
Gsc2(-)	0.258165
Pbx3(+)	0.257961
Nfatc2(-)	0.257756
Xbp1(+)	0.25768
Tbx4(+)	0.257663
Dlx3(+)	0.257338
Hoxa2(+)	0.25665
Pparg(-)	0.255663
Spdef(-)	0.255205
Nfe2(-)	0.255156
Mga(+)	0.255043
Hoxd12(+)	0.254793
Atoh7(+)	0.25477
Gsx1(-)	0.254616
Etv5(-)	0.254517
Dlx1(-)	0.254422
Fosl2(+)	0.253782
Gata4(-)	0.25338
Irf8(-)	0.252353
Foxo1(-)	0.252097
Cux1(+)	0.250488
Foxh1(-)	0.250396
Bach1(+)	0.250232
Prdm1(+)	0.249214
Lmx1b(+)	0.248857
Bcl6(-)	0.247885
Ovol2(+)	0.247138
Hoxa5(-)	0.246909
Tead4(-)	0.246878
Nfya(+)	0.246752
E2f2(+)	0.246104
Ehf(-)	0.245907
Foxc1(-)	0.245828
Lhx5(-)	0.24572
Mxi1(+)	0.244847
Thrb(-)	0.244157
Rfx4(+)	0.243863
Srf(+)	0.243433
Sox18(+)	0.243059
Six1(-)	0.242976
Rax(+)	0.24291
Ebf1(+)	0.241341
Sox6(+)	0.241084
Elf2(+)	0.240731
Zbtb7a(-)	0.240547
Hoxa1(-)	0.240071
Gata5(+)	0.239824
Tbx5(-)	0.239733
En2(-)	0.239521
Tbx1(+)	0.23907
Foxa1(-)	0.238971
Zbtb14(+)	0.238506
Nr2f6(+)	0.237824
Cebpa(-)	0.237476
Zic3(+)	0.237341
Tbx18(-)	0.236377
Thrb(+)	0.235974
Sp9(-)	0.235435
Bhlha15(+)	0.235346
Ovol2(-)	0.235055
Alx4(-)	0.23481
Msc(+)	0.233875
Sp4(+)	0.233492
Srebf1(+)	0.233135
Fosl1(+)	0.232781
Stat2(+)	0.232494
Wt1(-)	0.232487
Gata6(-)	0.232286
Vax2(-)	0.23162
Nr2f2(+)	0.230932
Cux1(-)	0.23066
Zbtb26(-)	0.230579
Runx2(+)	0.230365
Gsc2(+)	0.229584
Rhox11(-)	0.229276
E2f8(-)	0.227674
Hoxa6(+)	0.226732
Hoxc13(-)	0.226574
Nr1h4(-)	0.226302
Myf6(-)	0.226268
Rfx2(+)	0.22608
Zic4(-)	0.224536
Dbp(-)	0.224396
Hoxb4(+)	0.223657
Nr4a1(+)	0.223549
Tcf4(-)	0.223307
Bach2(+)	0.223269
Plagl1(+)	0.22189
Dlx5(+)	0.221752
Mef2c(+)	0.221622
Hnf1a(-)	0.221208
Maff(+)	0.219048
Hoxb5(+)	0.218738
Sox8(+)	0.2187
Eomes(+)	0.218611
Foxl1(-)	0.217824
Foxg1(-)	0.217187
Hoxb13(+)	0.216268
Stat1(-)	0.216205
Mitf(+)	0.213887
Alx1(+)	0.211351
Ets2(+)	0.210872
Stat4(-)	0.20999
Tbx5(+)	0.209603
Tfap2c(-)	0.209296
Ehf(+)	0.208844
Fev(+)	0.2086
Pax7(+)	0.2084
Pitx1(-)	0.207714
Stat5a(-)	0.207489
Elf1(-)	0.206986
Rhox11(+)	0.205998
Sox17(-)	0.205073
Sox10(+)	0.204071
Irf7(+)	0.203004
Zfx(+)	0.202785
Jdp2(-)	0.202514
Etv2(-)	0.201697
Meis1(+)	0.201205
Lhx4(-)	0.201138
Nfkb1(+)	0.199485
Hsf2(+)	0.199015
Klf12(-)	0.198823
Elf2(-)	0.198499
Runx1(-)	0.197845
Gbx1(+)	0.197658
Pou2f3(+)	0.197642
Otx1(+)	0.196824
Gata5(-)	0.195305
Hoxa4(+)	0.194899
Sox3(-)	0.193435
Dlx2(+)	0.193416
Foxa2(+)	0.192594
Ctcf(+)	0.191005
Yy1(-)	0.190729
Sp2(+)	0.190624
Vdr(-)	0.190242
Hoxa10(-)	0.189506
Hey1(-)	0.18937
Irf9(+)	0.188387
Vsx2(-)	0.187444
Nr2c2(+)	0.186252
Mzf1(+)	0.185821
Tfeb(-)	0.185765
Foxf2(-)	0.184949
Zic3(-)	0.184255
Irf1(-)	0.184107
Tlx2(+)	0.183019
Irf9(-)	0.181879
Irf6(-)	0.181397
Pou3f2(+)	0.181391
Gcm1(+)	0.180894
Stat5a(+)	0.180222
Jdp2(+)	0.180095
Zbtb18(+)	0.179969
Elk1(-)	0.179832
Creb3(-)	0.179781
E2f3(-)	0.179158
Cebpe(+)	0.178436
Gbx2(-)	0.178428
Foxj2(-)	0.178321
Hoxa1(+)	0.177745
Foxa1(+)	0.176503
Zeb1(-)	0.175588
Sox21(-)	0.175564
Lhx4(+)	0.175521
Olig3(-)	0.175307
Nr1h3(-)	0.174044
Foxo6(-)	0.17398
Nhlh1(+)	0.173844
Stat6(-)	0.173288
Olig1(+)	0.17291
Bhlhe22(-)	0.172756
Alx3(-)	0.172547
Atf2(-)	0.172088
Dlx3(-)	0.172036
Myod1(+)	0.172021
Tfdp1(-)	0.171867
Tcf7l1(-)	0.171489
Myf5(-)	0.171248
Esrra(-)	0.170903
Rorc(+)	0.170724
Cebpd(-)	0.1705
Nfe2l2(-)	0.169651
Nr1d1(-)	0.16961
Srebf2(-)	0.169562
Vax2(+)	0.169554
Nr5a2(-)	0.169477
Onecut3(+)	0.16945
Scrt1(+)	0.16924
Arid5a(-)	0.168845
Zbtb12(-)	0.168627
Tbx20(-)	0.168527
Nfyb(-)	0.168438
Rfx7(-)	0.168368
Erf(-)	0.168016
Sox18(-)	0.167584
Esrra(+)	0.167445
Klf13(-)	0.167445
