# Supplementary material for: Chromatin spatial analysis by METALoci unveils sex-determining 3D regulatory hubs
Source: Nat Struct Mol Biol. 2026 Feb 24;33(4):577–89. doi: 10.1038/s41594-026-01749-z (PMC13095655; doi:10.1038/s41594-026-01749-z)
Supplement: Supplementary file 18 — RNA-seq and DESeq data from Meis1 mutants. [file 41594_2026_1749_MOESM18_ESM.xlsx]

## Sheet: ED_Fig9a
gene	meis1KO_rep1	meis1KO_rep2	meis1KO_rep3	meis1KO_rep4	wt_rep1	wt_rep2	wt_rep3
ENSMUSG00000051951	411	154	286	268	346	263	201
ENSMUSG00000089699	0	0	0	0	0	1	0
ENSMUSG00000102343	0	0	0	0	0	0	0
ENSMUSG00000025900	7	7	12	8	23	5	6
ENSMUSG00000025902	592	405	823	598	962	947	510
ENSMUSG00000104328	2	2	0	0	1	2	2
ENSMUSG00000033845	2439	2753	2930	3055	1220	2971	2542
ENSMUSG00000025903	1853	2103	2209	2303	765	1801	1637
ENSMUSG00000104217	0	0	0	0	0	0	2
ENSMUSG00000033813	4650	4826	5230	5443	2644	4908	4158
ENSMUSG00000002459	3	9	11	6	20	8	3
ENSMUSG00000085623	0	0	0	0	0	0	0
ENSMUSG00000033793	2123	2293	2579	2505	1449	2522	2048
ENSMUSG00000025905	1	0	3	4	0	4	0
ENSMUSG00000033774	158	123	150	153	135	198	121
ENSMUSG00000025907	3230	2937	3427	3410	2391	3582	2819
ENSMUSG00000090031	112	87	101	103	38	51	67
ENSMUSG00000087247	0	2	0	0	0	0	1
ENSMUSG00000033740	3	1	10	4	6	1	2
ENSMUSG00000051285	2074	2077	2301	1940	1725	1753	1399
ENSMUSG00000097797	28	40	40	27	41	38	41
ENSMUSG00000103067	0	1	1	1	0	1	5
ENSMUSG00000025909	12	7	23	8	10	5	8
ENSMUSG00000061024	3090	3550	4341	4919	2357	5229	3618
ENSMUSG00000025911	483	357	531	489	372	520	371
ENSMUSG00000067879	396	513	753	539	343	581	527
ENSMUSG00000099827	0	0	0	0	0	0	1
ENSMUSG00000025912	1454	1601	1710	1810	1263	2217	1317
ENSMUSG00000045210	4840	4428	5440	5076	3464	5032	3665
ENSMUSG00000097893	14	16	28	20	27	23	23
ENSMUSG00000025915	2033	1995	2501	2149	1795	2527	2103
ENSMUSG00000046101	59	62	54	83	16	62	74
ENSMUSG00000098234	818	1089	999	942	634	857	607
ENSMUSG00000099032	315	251	399	266	307	320	258
ENSMUSG00000025916	0	0	1	4	4	0	1
ENSMUSG00000087199	0	0	1	0	0	0	0
ENSMUSG00000025917	4607	5330	5819	5726	2795	4927	4029
ENSMUSG00000056763	1769	1827	1849	1938	1670	2135	1604
ENSMUSG00000067851	7051	6948	7829	7630	4552	8204	6248
ENSMUSG00000042501	6	7	10	6	10	3	6
ENSMUSG00000048960	1123	660	1116	1014	739	901	481
ENSMUSG00000057715	21	18	27	24	10	40	20
ENSMUSG00000097171	0	0	0	0	0	0	0
ENSMUSG00000101314	0	0	0	0	0	0	0
ENSMUSG00000016918	6573	6312	9034	6254	7129	6621	4440
ENSMUSG00000025938	147	160	207	164	92	156	116
ENSMUSG00000099498	2	8	3	2	0	5	9
ENSMUSG00000042414	214	328	287	342	9	440	444
ENSMUSG00000005886	5671	4708	5975	5522	4562	5825	4482
ENSMUSG00000101476	1	1	5	1	1	7	1
ENSMUSG00000025935	5022	4642	5757	5121	2697	4581	3516
ENSMUSG00000025937	882	753	917	839	416	648	554
ENSMUSG00000067813	1	0	2	0	0	3	1
ENSMUSG00000025932	550	452	550	515	345	468	358
ENSMUSG00000054493	13	4	8	22	6	9	12
ENSMUSG00000025930	256	123	159	153	162	141	196
ENSMUSG00000032769	19	12	13	17	10	33	8
ENSMUSG00000092083	41	44	46	28	64	22	14
ENSMUSG00000025925	1747	2382	2217	2388	929	2474	2441
ENSMUSG00000032719	45	32	45	30	68	21	14
ENSMUSG00000067795	6	3	3	5	4	3	2
ENSMUSG00000043716	47077	50456	53942	50868	32513	47234	41359
ENSMUSG00000025921	1231	1068	1700	1320	1277	1054	789
ENSMUSG00000100868	0	3	1	4	3	1	0
ENSMUSG00000025920	2170	1917	2431	2145	1550	2097	1719
ENSMUSG00000089982	2	1	0	2	0	0	0
ENSMUSG00000025939	1698	1570	1771	1649	1086	1330	1036
ENSMUSG00000079658	3369	3712	4023	3885	1697	2830	2265
ENSMUSG00000097744	0	1	1	0	0	5	0
ENSMUSG00000025940	1649	1860	2060	1969	1179	1496	1243
ENSMUSG00000025779	138	120	164	153	74	86	95
ENSMUSG00000101640	0	0	0	0	0	0	0
ENSMUSG00000042686	204	170	203	202	133	170	119
ENSMUSG00000100110	0	0	0	0	0	0	0
ENSMUSG00000025777	6	8	16	9	16	7	3
ENSMUSG00000099899	0	0	0	0	0	0	0
ENSMUSG00000067780	1051	454	737	482	753	330	384
ENSMUSG00000100053	4	3	1	7	6	1	1
ENSMUSG00000085125	5	3	2	6	4	2	4
ENSMUSG00000025776	548	249	450	312	313	222	255
ENSMUSG00000099895	6	0	0	0	0	1	0
ENSMUSG00000025774	0	0	0	0	0	0	0
ENSMUSG00000073735	0	0	0	0	0	0	0
ENSMUSG00000067773	0	0	0	0	0	0	0
ENSMUSG00000089787	0	0	0	0	0	0	0
ENSMUSG00000042596	0	0	0	0	0	0	0
ENSMUSG00000025927	20	10	17	10	25	1	0
ENSMUSG00000100538	0	0	0	0	0	0	0
ENSMUSG00000043760	240	2	259	1	41	0	75
ENSMUSG00000089914	0	0	0	0	0	0	0
ENSMUSG00000099906	1	2	5	2	1	0	16
ENSMUSG00000025929	0	0	0	0	0	0	0
ENSMUSG00000041872	4	2	1	1	1	1	1
ENSMUSG00000041859	10293	10894	13237	13200	7729	15889	11964
ENSMUSG00000102121	0	0	2	0	0	3	1
ENSMUSG00000097934	10	8	5	9	2	3	8
ENSMUSG00000025931	1181	892	1233	1017	1058	1002	781
ENSMUSG00000041809	248	213	253	192	176	182	157
ENSMUSG00000041779	1600	1529	2002	1648	1196	1393	1077
ENSMUSG00000099971	0	0	0	1	0	0	0
ENSMUSG00000025933	197	159	215	153	155	136	96
ENSMUSG00000025934	819	654	862	631	652	636	471
ENSMUSG00000099343	1	0	6	0	2	1	0
ENSMUSG00000067750	58	69	55	132	3	139	126
ENSMUSG00000041722	15	29	18	30	1	49	64
ENSMUSG00000085079	2	0	5	1	0	2	0
ENSMUSG00000028033	111	49	115	41	166	72	57
ENSMUSG00000097109	1	0	1	0	11	0	1
ENSMUSG00000041670	55	57	77	88	53	65	60
ENSMUSG00000073730	0	0	0	1	0	0	0
ENSMUSG00000097970	6	8	2	1	14	15	9
ENSMUSG00000100775	0	0	0	0	3	4	2
ENSMUSG00000026158	776	769	905	768	552	780	584
ENSMUSG00000099503	0	0	0	0	0	0	0
ENSMUSG00000026156	68	41	95	36	65	61	46
ENSMUSG00000026155	1863	1985	2183	2352	1413	2477	1901
ENSMUSG00000026154	799	1047	1004	925	473	749	553
ENSMUSG00000026153	2753	2600	2938	2737	1753	2643	1917
ENSMUSG00000026147	788	802	1155	1106	786	1436	928
ENSMUSG00000026141	4	2	1	1	4	0	12
ENSMUSG00000073725	1508	1339	1780	1416	1180	1153	959
ENSMUSG00000100483	0	0	0	0	0	0	0
ENSMUSG00000099392	0	0	0	0	0	0	0
ENSMUSG00000033569	135	51	137	68	145	73	65
ENSMUSG00000073722	0	0	0	0	0	2	0
ENSMUSG00000101514	0	0	0	0	0	0	0
ENSMUSG00000048411	0	0	0	0	0	1	0
ENSMUSG00000053185	0	0	0	0	0	0	0
ENSMUSG00000048874	6457	5711	6942	6891	5319	8000	5927
ENSMUSG00000026064	1927	1903	2262	2221	1379	1944	1303
ENSMUSG00000100371	0	0	0	0	0	0	0
ENSMUSG00000100237	0	0	0	0	0	0	0
ENSMUSG00000086727	0	0	0	0	0	0	0
ENSMUSG00000100910	0	0	0	0	0	0	0
ENSMUSG00000050217	0	0	0	0	0	0	0
ENSMUSG00000026063	0	0	0	0	0	0	0
ENSMUSG00000026058	29	25	28	16	82	18	27
ENSMUSG00000091318	1	0	2	1	4	1	1
ENSMUSG00000102917	0	0	0	0	0	0	0
ENSMUSG00000104230	0	0	0	0	0	0	0
ENSMUSG00000026134	1779	1804	2174	2183	1171	2024	1685
ENSMUSG00000004768	1876	1675	2287	2031	1540	2240	1665
ENSMUSG00000042215	1075	894	1108	985	663	1135	744
ENSMUSG00000042197	4665	4601	5301	5402	2965	5512	4405
ENSMUSG00000042182	95	81	91	79	49	77	57
ENSMUSG00000026131	8946	6670	7489	8507	10738	12031	4756
ENSMUSG00000104397	0	0	0	0	0	0	0
ENSMUSG00000102336	485	411	465	533	363	491	275
ENSMUSG00000042111	1517	1531	1638	1436	905	1149	958
ENSMUSG00000101711	4	4	2	1	5	3	2
ENSMUSG00000026127	2923	2727	3582	3282	2239	3510	2683
ENSMUSG00000026126	109	109	136	114	65	89	63
ENSMUSG00000101223	0	0	1	1	4	2	1
ENSMUSG00000026125	0	0	0	0	1	0	0
ENSMUSG00000026124	0	0	0	0	3	1	1
ENSMUSG00000037529	0	0	1	0	2	2	1
ENSMUSG00000045815	0	0	0	0	0	0	0
ENSMUSG00000045174	3	0	2	0	0	0	0
ENSMUSG00000037509	713	545	723	676	1050	835	633
ENSMUSG00000104002	28	24	27	41	88	37	30
ENSMUSG00000037503	16415	14747	19443	18822	13130	15987	10984
ENSMUSG00000026123	506	465	571	503	413	421	365
ENSMUSG00000104417	0	0	0	0	2	0	1
ENSMUSG00000101714	0	0	0	0	0	0	0
ENSMUSG00000102531	5	0	1	1	0	0	0
ENSMUSG00000102279	1	0	0	0	0	0	0
ENSMUSG00000103708	3	1	6	6	2	6	1
ENSMUSG00000104201	0	1	0	0	0	0	0
ENSMUSG00000045216	13353	10224	14866	14350	10579	15227	10121
ENSMUSG00000104523	0	0	0	0	0	0	0
ENSMUSG00000102202	46	38	47	35	64	50	23
ENSMUSG00000037470	7097	5913	7619	7049	6642	8093	5394
ENSMUSG00000047180	142	76	166	58	138	106	54
ENSMUSG00000037447	278	198	318	291	279	337	273
ENSMUSG00000102762	0	4	5	7	6	4	1
ENSMUSG00000010453	5201	4345	6001	5330	5154	5930	4292
ENSMUSG00000037432	233	234	329	262	284	359	269
ENSMUSG00000001143	1689	1603	2046	1863	1697	2020	1617
ENSMUSG00000037408	688	626	907	818	746	977	680
ENSMUSG00000001138	1648	1603	2273	2208	1612	2251	1803
ENSMUSG00000102845	0	0	0	0	0	0	0
ENSMUSG00000067653	29	38	35	23	79	41	28
ENSMUSG00000109510	0	0	0	1	0	0	1
ENSMUSG00000079610	291	307	394	360	379	335	237
ENSMUSG00000026121	3423	2751	3785	3084	3198	2777	1919
ENSMUSG00000046337	100	120	119	119	18	159	187
ENSMUSG00000061518	4972	5090	5869	5912	2801	5122	3734
ENSMUSG00000037351	5740	5151	7120	6071	4759	6709	4908
ENSMUSG00000102416	1	7	2	3	1	6	3
ENSMUSG00000104237	1	2	2	0	0	0	0
ENSMUSG00000026117	13	6	13	14	10	17	9
ENSMUSG00000026116	7532	5786	7883	7565	6586	8566	5911
ENSMUSG00000050122	28	11	20	18	16	25	17
ENSMUSG00000103603	0	0	0	0	6	0	0
ENSMUSG00000026114	3	12	9	6	2	7	20
ENSMUSG00000026113	1109	1063	1394	1215	1152	1248	932
ENSMUSG00000086064	0	0	0	0	2	3	0
ENSMUSG00000026112	4436	4114	5215	4727	2980	4141	3094
ENSMUSG00000026111	1707	1632	2081	1867	1224	1752	1311
ENSMUSG00000026110	500	539	595	455	275	629	555
ENSMUSG00000026090	382	347	393	327	259	552	552
ENSMUSG00000089767	0	1	4	0	0	0	0
ENSMUSG00000060771	315	311	397	352	299	323	256
ENSMUSG00000097268	5	8	0	0	4	8	1
ENSMUSG00000037216	223	231	251	231	138	265	222
ENSMUSG00000026088	528	552	615	529	361	567	482
ENSMUSG00000026087	2314	2344	2721	2489	1397	2352	2058
ENSMUSG00000061584	0	0	0	0	0	0	0
ENSMUSG00000087374	0	1	0	2	0	0	0
ENSMUSG00000026085	0	0	0	0	1	0	1
ENSMUSG00000058407	2914	3128	3452	3235	2013	3048	2512
ENSMUSG00000026083	10747	11168	11669	11921	7439	15845	12440
ENSMUSG00000026082	1817	1797	1949	2153	1244	2386	1798
ENSMUSG00000102716	1	0	0	0	0	0	0
ENSMUSG00000037138	5703	5236	7145	6127	5147	6823	5259
ENSMUSG00000085391	1	2	4	3	6	5	1
ENSMUSG00000085280	1	6	2	4	17	1	1
ENSMUSG00000087131	2	6	3	3	5	4	3
ENSMUSG00000048814	520	413	570	518	404	589	429
ENSMUSG00000026080	580	620	761	691	631	863	602
ENSMUSG00000103647	0	0	0	0	0	0	0
ENSMUSG00000067604	2	2	1	0	0	0	0
ENSMUSG00000026078	2183	2267	2504	2351	1750	2272	1838
ENSMUSG00000104188	0	0	0	0	0	0	0
ENSMUSG00000026077	139	50	99	65	88	85	70
ENSMUSG00000073702	19766	18285	21241	21670	12927	18137	15148
ENSMUSG00000003134	1308	1123	1460	1256	1518	1432	1063
ENSMUSG00000003135	2563	2723	3437	3228	1599	3224	2349
ENSMUSG00000048234	2364	2487	3048	3363	1771	3046	2188
ENSMUSG00000050967	18	25	37	23	6	28	48
ENSMUSG00000097083	14	8	5	3	2	5	19
ENSMUSG00000057173	20	26	31	26	18	15	15
ENSMUSG00000091937	1	3	1	6	0	2	1
ENSMUSG00000101634	1	2	0	3	2	3	1
ENSMUSG00000026074	20813	18182	22206	21337	17156	24450	16863
ENSMUSG00000026073	23	8	14	14	5	6	3
ENSMUSG00000097899	7	3	10	3	1	9	7
ENSMUSG00000026072	1169	939	1255	1022	977	783	580
ENSMUSG00000070942	1197	908	1279	1025	924	769	559
ENSMUSG00000026069	49	30	33	27	43	23	23
ENSMUSG00000026070	0	0	1	0	0	1	0
ENSMUSG00000026068	5	0	5	1	1	17	1
ENSMUSG00000104441	0	0	0	0	0	0	0
ENSMUSG00000026065	0	0	3	0	0	0	0
ENSMUSG00000026062	118	92	145	117	197	204	123
ENSMUSG00000103679	1	0	0	0	0	0	0
ENSMUSG00000103270	1	2	0	1	0	0	4
ENSMUSG00000041945	54	68	77	62	59	73	57
ENSMUSG00000079588	1	4	5	0	4	2	17
ENSMUSG00000104072	0	0	0	0	0	0	0
ENSMUSG00000100185	0	0	0	0	0	0	0
ENSMUSG00000100832	0	0	0	0	1	0	0
ENSMUSG00000053640	0	0	0	0	0	0	0
ENSMUSG00000101919	0	0	0	0	0	0	0
ENSMUSG00000101299	0	0	1	0	0	0	0
ENSMUSG00000100180	0	0	0	0	0	0	0
ENSMUSG00000060424	16	3	8	2	7	2	4
ENSMUSG00000045515	153	51	200	79	95	57	41
ENSMUSG00000099784	0	0	0	0	0	0	0
ENSMUSG00000060679	1805	2040	2254	2140	1263	2232	1980
ENSMUSG00000041907	24	28	36	23	45	35	23
ENSMUSG00000070939	1461	1260	1719	1432	1324	1559	1155
ENSMUSG00000100269	0	0	0	0	0	0	0
ENSMUSG00000041878	7	15	9	6	3	3	6
ENSMUSG00000010290	1974	1952	2233	2117	1175	1780	1274
ENSMUSG00000008136	700	485	768	572	513	431	406
ENSMUSG00000099576	2	0	0	0	0	0	0
ENSMUSG00000066877	3654	3674	4471	4243	3286	4333	3000
ENSMUSG00000026051	69	60	55	46	26	34	28
ENSMUSG00000100764	3	5	1	2	2	7	4
ENSMUSG00000100635	0	1	1	1	2	1	3
ENSMUSG00000100480	4	5	5	3	2	4	4
ENSMUSG00000057363	2427	2324	2709	2661	1700	2528	1791
ENSMUSG00000041763	6483	5993	7300	6941	4135	6978	5203
ENSMUSG00000047343	64	55	82	75	88	84	65
ENSMUSG00000091844	7	4	8	11	3	14	7
ENSMUSG00000026049	1162	1633	1541	1645	526	1570	1494
ENSMUSG00000026047	2880	2475	3206	2654	2253	2719	2003
ENSMUSG00000041684	1536	1522	1583	1523	944	1292	1048
ENSMUSG00000026048	1297	1379	1580	1382	1305	1437	1022
ENSMUSG00000046828	0	0	0	0	0	0	0
ENSMUSG00000056870	1266	832	1276	819	684	740	612
ENSMUSG00000101701	0	0	0	1	0	1	0
ENSMUSG00000026043	106468	66377	115732	78459	103826	85973	69106
ENSMUSG00000026042	10838	8274	13549	9119	11328	8617	7798
ENSMUSG00000025995	3083	3570	4011	4161	1622	4359	3941
ENSMUSG00000098549	10	6	14	9	2	6	0
ENSMUSG00000025993	2613	1883	2652	2021	2217	2405	1851
ENSMUSG00000041144	390	393	428	414	498	466	229
ENSMUSG00000101337	56	43	86	73	54	63	31
ENSMUSG00000025986	8421	7088	9606	8755	5751	7975	6369
ENSMUSG00000100213	67	81	58	63	53	32	27
ENSMUSG00000101447	0	0	0	0	1	0	0
ENSMUSG00000051616	0	0	0	0	0	0	0
ENSMUSG00000099608	0	0	0	0	0	1	0
ENSMUSG00000100451	0	0	0	0	0	0	0
ENSMUSG00000100816	2	0	7	1	0	2	2
ENSMUSG00000026109	161	86	148	87	225	169	214
ENSMUSG00000100671	0	0	0	0	0	0	0
ENSMUSG00000101242	0	3	0	0	0	0	0
ENSMUSG00000099625	0	0	0	0	0	0	0
ENSMUSG00000101799	4	1	2	2	11	2	4
ENSMUSG00000045954	725	622	849	595	715	583	517
ENSMUSG00000101702	0	0	0	0	0	0	0
ENSMUSG00000026107	2100	1979	2198	2205	1523	2565	1910
ENSMUSG00000099413	4	0	5	1	1	2	0
ENSMUSG00000101741	1	2	1	1	0	0	3
ENSMUSG00000018417	5678	5069	5555	5322	4239	6075	4596
ENSMUSG00000062939	31	38	30	33	20	19	28
ENSMUSG00000109599	14	8	14	17	2	7	12
ENSMUSG00000026104	1237	938	1155	1097	749	1100	633
ENSMUSG00000026103	2957	3023	3121	3516	2329	2507	1625
ENSMUSG00000002881	3469	2958	3408	3097	2273	2866	2187
ENSMUSG00000100120	0	0	2	3	0	2	1
ENSMUSG00000099878	0	0	1	0	0	0	0
ENSMUSG00000043015	887	917	983	983	752	796	536
ENSMUSG00000041439	103	84	107	86	100	95	89
ENSMUSG00000026102	787	689	861	703	553	675	457
ENSMUSG00000041426	964	1010	1093	1022	640	837	662
ENSMUSG00000043629	88	89	104	142	28	136	124
ENSMUSG00000026100	0	2	0	0	0	4	47
ENSMUSG00000060715	5	5	19	13	5	13	16
ENSMUSG00000026098	710	746	816	771	410	834	731
ENSMUSG00000100763	0	1	1	0	2	0	0
ENSMUSG00000026097	770	992	864	902	455	820	602
ENSMUSG00000100679	0	0	0	3	0	0	0
ENSMUSG00000026096	377	425	402	382	283	371	278
ENSMUSG00000099913	3	5	18	10	19	9	14
ENSMUSG00000026095	522	633	728	599	436	534	434
ENSMUSG00000096141	5	6	8	10	5	10	11
ENSMUSG00000026094	904	1000	1018	1096	409	1166	1294
ENSMUSG00000042807	1252	844	1287	1074	1147	1386	810
ENSMUSG00000025983	33	44	51	40	41	53	26
ENSMUSG00000041303	2666	2852	3110	2905	1578	2889	2644
ENSMUSG00000109809	0	0	0	0	0	0	0
ENSMUSG00000073678	1293	1295	1435	1345	972	1300	923
ENSMUSG00000052331	895	738	1045	849	714	728	443
ENSMUSG00000101674	0	0	0	0	0	0	0
ENSMUSG00000025982	20690	20622	23353	21748	15577	22147	16083
ENSMUSG00000025981	583	497	686	682	402	567	527
ENSMUSG00000025980	30552	30714	33776	32282	18766	33813	28522
ENSMUSG00000073676	8151	9534	8680	8760	5136	8591	7843
ENSMUSG00000025979	4924	4300	5362	4884	2969	3440	2972
ENSMUSG00000025978	1234	935	1160	907	902	908	690
ENSMUSG00000097649	92	61	81	45	57	44	37
ENSMUSG00000046994	636	662	833	935	380	623	440
ENSMUSG00000025977	36	51	59	46	10	40	39
ENSMUSG00000038349	1017	483	1062	637	694	504	459
ENSMUSG00000099950	1	0	0	0	2	0	0
ENSMUSG00000100372	0	0	0	0	0	0	0
ENSMUSG00000101332	0	0	0	0	0	0	0
ENSMUSG00000045336	0	0	0	0	0	0	0
ENSMUSG00000038331	177	147	177	182	66	225	172
ENSMUSG00000099945	0	0	0	0	0	0	0
ENSMUSG00000101429	1	2	1	0	2	2	0
ENSMUSG00000097519	68	80	81	92	38	107	101
ENSMUSG00000038323	517	524	626	580	328	463	377
ENSMUSG00000048495	354	400	432	399	279	411	337
ENSMUSG00000025971	715	706	887	870	566	688	516
ENSMUSG00000038305	3514	2384	3463	2716	3078	3492	2882
ENSMUSG00000091283	0	1	0	3	2	4	6
ENSMUSG00000054770	994	1170	1156	1123	676	1470	1298
ENSMUSG00000026039	1120	1175	1298	1466	672	1514	1315
ENSMUSG00000063558	147	146	105	105	97	79	86
ENSMUSG00000064294	56	40	59	44	32	69	46
ENSMUSG00000038242	91	81	74	59	28	64	28
ENSMUSG00000089822	4	5	0	1	1	1	2
ENSMUSG00000079554	72	56	66	92	62	50	48
ENSMUSG00000051223	21081	21596	25357	24511	12717	21224	17034
ENSMUSG00000026034	3911	3894	4546	3824	4541	3887	3158
ENSMUSG00000026035	806	957	928	950	564	901	717
ENSMUSG00000026036	1652	1640	1898	1749	1133	1830	1496
ENSMUSG00000026037	1960	2181	2330	2505	1409	2568	2155
ENSMUSG00000085054	22	13	23	21	22	14	24
ENSMUSG00000038174	1029	875	1019	904	672	755	490
ENSMUSG00000026032	1833	2034	2099	1995	1185	1801	1358
ENSMUSG00000047528	13	16	8	10	0	4	5
ENSMUSG00000026031	3161	2645	3305	2827	2301	2351	1638
ENSMUSG00000026029	1377	1161	1303	1252	1114	1183	800
ENSMUSG00000026028	2691	2123	2867	2357	2295	2652	1852
ENSMUSG00000026027	813	914	1086	941	664	928	733
ENSMUSG00000047383	0	2	0	2	0	1	1
ENSMUSG00000099752	0	0	0	0	0	0	0
ENSMUSG00000072295	7	28	22	18	0	21	49
ENSMUSG00000038079	1153	1128	1248	1197	948	1160	1056
ENSMUSG00000097573	48	34	41	42	40	35	27
ENSMUSG00000079550	13	15	17	17	7	12	4
ENSMUSG00000101586	16	5	14	2	23	14	6
ENSMUSG00000026024	2843	2968	3260	3453	2049	4020	3083
ENSMUSG00000026023	29	14	28	38	11	29	17
ENSMUSG00000099922	2	0	5	0	1	3	1
ENSMUSG00000041075	3501	2971	4481	3830	3069	3420	2845
ENSMUSG00000097819	21	9	22	21	14	18	10
ENSMUSG00000047361	15	14	19	28	5	16	14
ENSMUSG00000099811	1	0	2	0	0	0	2
ENSMUSG00000101409	0	0	0	0	0	0	0
ENSMUSG00000026021	4775	5333	5223	5257	3098	4636	3630
ENSMUSG00000026020	8583	9924	10909	11141	5248	10938	9228
ENSMUSG00000067336	9373	7087	9817	8589	6169	6965	4263
ENSMUSG00000041040	2366	2396	2888	2631	1724	2567	2154
ENSMUSG00000026018	15	34	44	50	32	29	25
ENSMUSG00000026019	1809	2103	2358	2388	1165	2409	1904
ENSMUSG00000026017	640	668	732	643	490	517	405
ENSMUSG00000073664	1996	1663	1740	1868	1335	1640	891
ENSMUSG00000049439	1507	1343	1754	1692	1108	1439	1040
ENSMUSG00000026782	3955	3730	4337	4123	2465	3572	2628
ENSMUSG00000026014	3586	3425	4279	3986	3071	4076	2803
ENSMUSG00000026012	25	27	27	30	17	20	14
ENSMUSG00000086795	3	0	0	0	0	2	1
ENSMUSG00000085965	0	0	0	0	0	0	1
ENSMUSG00000026011	0	0	0	1	0	0	0
ENSMUSG00000026009	4	14	18	7	17	7	4
ENSMUSG00000100893	0	0	0	0	0	0	0
ENSMUSG00000085248	0	0	2	0	0	0	0
ENSMUSG00000085447	1	2	1	0	0	0	3
ENSMUSG00000086408	0	0	0	0	0	0	0
ENSMUSG00000100965	0	0	0	0	0	0	0
ENSMUSG00000086009	0	0	0	0	0	0	0
ENSMUSG00000052062	1076	807	1184	952	1177	1086	746
ENSMUSG00000085842	5	1	0	1	0	0	0
ENSMUSG00000085019	2	0	0	0	2	0	1
ENSMUSG00000085400	0	0	0	0	0	0	0
ENSMUSG00000100750	0	0	3	0	2	1	0
ENSMUSG00000025969	3775	3287	5698	4700	3490	3300	2349
ENSMUSG00000100811	1	0	2	0	0	1	2
ENSMUSG00000100426	2	1	2	0	3	5	0
ENSMUSG00000040865	1930	1732	2183	2007	1873	1900	1038
ENSMUSG00000084799	93	93	85	93	123	86	62
ENSMUSG00000101599	149	179	178	188	261	139	105
ENSMUSG00000025968	6060	6229	7177	6760	3983	6768	5595
ENSMUSG00000025967	24242	27753	28535	28024	16696	25160	19951
ENSMUSG00000046856	3	4	14	11	0	5	5
ENSMUSG00000087561	1	0	0	0	5	0	0
ENSMUSG00000027520	4529	2962	3337	4648	4052	4420	2029
ENSMUSG00000025964	1129	671	922	909	1257	913	801
ENSMUSG00000115378	0	0	0	0	0	0	0
ENSMUSG00000069085	3	0	0	0	0	0	0
ENSMUSG00000025963	6	4	8	7	1	4	6
ENSMUSG00000025962	1252	1408	1559	1524	799	1264	1135
ENSMUSG00000025961	8	4	9	7	2	9	6
ENSMUSG00000044689	12	4	10	14	2	5	1
ENSMUSG00000025959	970	871	1098	975	685	916	694
ENSMUSG00000097272	0	0	0	0	0	0	0
ENSMUSG00000086836	0	0	0	0	1	0	0
ENSMUSG00000101895	0	0	0	0	1	0	0
ENSMUSG00000025958	4275	3875	4954	4443	3350	4016	2854
ENSMUSG00000025956	624	646	774	667	462	536	381
ENSMUSG00000101832	8	4	17	8	17	15	7
ENSMUSG00000100437	7	11	4	4	6	6	4
ENSMUSG00000070871	1695	1665	1948	2092	1046	2136	1617
ENSMUSG00000045005	768	834	947	1014	493	968	736
ENSMUSG00000051344	1007	899	1154	1120	851	959	674
ENSMUSG00000025955	12588	11675	13170	10985	8435	10526	7108
ENSMUSG00000070870	18	29	30	25	25	14	23
ENSMUSG00000067299	1	0	3	0	0	0	0
ENSMUSG00000025952	4	21	12	12	4	10	5
ENSMUSG00000073658	4	16	7	7	2	4	1
ENSMUSG00000044429	0	1	0	1	0	0	0
ENSMUSG00000100846	0	0	0	0	0	0	0
ENSMUSG00000044816	24	30	21	21	1	18	19
ENSMUSG00000025950	14536	12889	14696	12232	8013	10201	8340
ENSMUSG00000025949	2228	2088	2410	2423	1663	2356	1408
ENSMUSG00000025946	3	2	14	3	5	2	4
ENSMUSG00000025945	0	0	0	0	0	0	1
ENSMUSG00000015222	3495	3321	2919	3036	2029	3254	2120
ENSMUSG00000073656	4	3	0	2	2	0	0
ENSMUSG00000055567	30	37	40	37	25	37	23
ENSMUSG00000026005	1620	1683	1782	1789	1001	1526	1254
ENSMUSG00000026004	1632	1369	1850	1608	1432	1479	1258
ENSMUSG00000026003	3950	3773	4185	3798	2750	3823	3101
ENSMUSG00000061816	68	48	102	61	146	17	245
ENSMUSG00000026000	2252	2479	2866	2409	1831	2340	1937
ENSMUSG00000025991	21	21	24	26	7	12	15
ENSMUSG00000086204	0	0	0	0	0	0	0
ENSMUSG00000085075	0	0	0	0	0	0	0
ENSMUSG00000087329	0	0	0	0	0	0	0
ENSMUSG00000062209	542	333	450	448	440	597	395
ENSMUSG00000099804	0	0	0	0	0	0	0
ENSMUSG00000100354	1	2	0	0	2	0	0
ENSMUSG00000101156	0	1	0	0	1	1	0
ENSMUSG00000025997	147	170	204	132	169	103	70
ENSMUSG00000053153	30	30	47	33	10	24	22
ENSMUSG00000045648	0	0	3	0	0	0	0
ENSMUSG00000026196	931	1022	1216	1423	605	1352	1003
ENSMUSG00000050296	148	95	92	73	119	106	79
ENSMUSG00000026192	5245	5689	6788	6549	3601	7497	5855
ENSMUSG00000026193	26578	19312	27492	23005	33277	31631	22134
ENSMUSG00000073652	22	20	29	14	8	26	30
ENSMUSG00000099707	0	0	0	0	0	0	0
ENSMUSG00000101211	1	5	9	9	1	2	0
ENSMUSG00000101848	1	0	5	1	11	2	3
ENSMUSG00000101764	3	0	0	0	0	0	0
ENSMUSG00000102123	0	0	1	2	3	1	1
ENSMUSG00000039395	204	338	333	386	24	437	398
ENSMUSG00000097131	132	169	171	131	160	156	155
ENSMUSG00000026189	667	706	812	852	427	777	672
ENSMUSG00000026188	32	26	36	18	7	18	32
ENSMUSG00000026187	2884	3253	3556	3498	1648	3876	3535
ENSMUSG00000039372	7	2	1	6	3	2	0
ENSMUSG00000039354	2389	2445	2886	2752	2041	2931	2347
ENSMUSG00000110712	8	6	10	4	14	1	6
ENSMUSG00000039342	0	0	2	2	0	2	2
ENSMUSG00000046330	19333	23792	24474	22438	11139	18000	13380
ENSMUSG00000039323	7135	5504	7566	6094	8290	5096	3379
ENSMUSG00000026185	85399	51176	76878	54743	80858	73318	53200
ENSMUSG00000101968	1	0	0	0	0	0	0
ENSMUSG00000026182	0	0	0	0	0	0	0
ENSMUSG00000101112	0	0	0	0	0	0	0
ENSMUSG00000099877	2	1	5	8	5	5	5
ENSMUSG00000101812	0	1	1	2	2	2	1
ENSMUSG00000100444	2	3	3	3	1	5	3
ENSMUSG00000100429	0	0	0	0	0	0	0
ENSMUSG00000100301	59	30	34	46	36	57	36
ENSMUSG00000101344	10	13	17	8	2	12	3
ENSMUSG00000055322	10780	8767	11951	10281	10365	10836	7717
ENSMUSG00000061815	87	90	109	87	106	96	76
ENSMUSG00000026180	3	2	5	2	4	3	3
ENSMUSG00000048480	0	1	0	0	0	2	0
ENSMUSG00000006304	9557	9339	10942	10071	6557	11014	8711
ENSMUSG00000064272	5	3	7	6	4	7	7
ENSMUSG00000006299	8099	8660	10411	9265	6449	10361	7774
ENSMUSG00000101503	0	0	0	0	0	0	0
ENSMUSG00000026179	3678	3518	4322	4011	3381	5218	4447
ENSMUSG00000006301	1071	987	1238	1019	963	1081	935
ENSMUSG00000073650	39	36	34	45	26	44	54
ENSMUSG00000026177	111	144	138	164	78	169	185
ENSMUSG00000026176	8796	8369	11186	9225	7545	9577	6869
ENSMUSG00000026175	103	24	134	23	3	11	61
ENSMUSG00000033364	4164	3985	4728	4844	3039	4599	3413
ENSMUSG00000026174	4648	5203	5846	5880	3149	5775	4472
ENSMUSG00000026173	14	28	29	26	8	10	15
ENSMUSG00000026135	1539	1316	1808	1685	1472	1982	1327
ENSMUSG00000026172	777	845	1054	834	689	1008	792
ENSMUSG00000026171	1640	1510	1987	1752	1470	1875	1406
ENSMUSG00000033276	567	537	639	463	598	512	430
ENSMUSG00000033257	5193	4952	6073	5916	4056	5755	3903
ENSMUSG00000026170	56	77	77	55	99	75	58
ENSMUSG00000006542	15	10	10	12	2	5	8
ENSMUSG00000033227	10144	9467	13994	13364	11576	13674	8412
ENSMUSG00000099472	87	63	101	47	152	88	58
ENSMUSG00000026167	28	19	45	19	28	20	7
ENSMUSG00000090071	22	7	17	12	23	17	10
ENSMUSG00000055197	17	12	30	29	15	7	8
ENSMUSG00000006546	0	1	0	0	0	0	0
ENSMUSG00000047021	0	0	0	0	0	0	0
ENSMUSG00000089653	0	0	0	0	0	0	0
ENSMUSG00000006538	32	5	44	4	8	8	5
ENSMUSG00000026162	174	218	232	192	156	222	187
ENSMUSG00000026205	10	3	21	3	8	3	5
ENSMUSG00000033159	1911	1752	2376	1910	1763	1962	1559
ENSMUSG00000049339	3261	3171	4137	3486	3065	3778	2908
ENSMUSG00000026197	666	689	744	641	597	655	449
ENSMUSG00000026198	1171	1197	1547	1467	959	1459	1170
ENSMUSG00000033124	2362	2152	2734	2248	2232	2358	1782
ENSMUSG00000026199	1455	1135	1450	1120	1280	1457	1178
ENSMUSG00000026200	623	389	744	455	544	470	362
ENSMUSG00000026201	2432	2629	2929	2833	2011	2702	1885
ENSMUSG00000026202	296	339	396	377	386	403	278
ENSMUSG00000096094	3	0	2	1	0	0	0
ENSMUSG00000026203	1501	1375	1632	1332	1405	1525	1131
ENSMUSG00000026204	22	14	27	13	47	31	9
ENSMUSG00000101840	0	0	0	0	0	0	0
ENSMUSG00000033061	5	0	2	0	2	0	1
ENSMUSG00000100556	0	0	0	0	0	0	0
ENSMUSG00000026209	4659	4313	5555	4626	4099	5084	3592
ENSMUSG00000026208	1331	800	1200	991	1316	1184	1162
ENSMUSG00000085653	1	0	0	0	6	0	0
ENSMUSG00000026207	1980	2027	2224	2009	2403	2099	1515
ENSMUSG00000086053	2	0	1	1	3	2	0
ENSMUSG00000033021	1403	1231	1698	1316	1162	1414	1195
ENSMUSG00000033007	138	178	239	168	301	130	83
ENSMUSG00000032997	3678	3105	5275	4337	3879	4284	2912
ENSMUSG00000026211	30206	26644	37509	33777	31561	36076	21826
ENSMUSG00000051703	187	177	265	254	303	259	156
ENSMUSG00000032968	11654	8133	9824	7682	7493	6080	5071
ENSMUSG00000026213	2318	2264	3166	2581	2367	2990	2094
ENSMUSG00000006576	1740	1409	2187	1672	2636	1884	1260
ENSMUSG00000099996	0	0	0	0	0	3	0
ENSMUSG00000100827	0	0	0	0	0	0	0
ENSMUSG00000100553	0	1	2	2	0	0	0
ENSMUSG00000100534	0	0	0	0	0	0	0
ENSMUSG00000026235	1270	1302	1705	1708	888	1582	1179
ENSMUSG00000101849	3	3	8	10	1	1	2
ENSMUSG00000102052	0	0	0	0	0	0	0
ENSMUSG00000004872	1	3	1	4	1	3	6
ENSMUSG00000032908	130	146	140	98	188	134	101
ENSMUSG00000099561	22	23	28	16	10	17	24
ENSMUSG00000026245	3079	3094	3835	3770	1796	4146	3475
ENSMUSG00000090486	16	12	6	13	16	4	10
ENSMUSG00000012187	2	9	0	6	2	3	7
ENSMUSG00000099364	1	3	0	1	0	1	0
ENSMUSG00000100562	0	2	0	0	0	0	1
ENSMUSG00000032883	5279	5070	5456	5109	2399	5143	5176
ENSMUSG00000079470	1236	1340	1344	1436	605	1205	1072
ENSMUSG00000099706	1	0	0	0	0	0	0
ENSMUSG00000047330	346	253	353	243	317	265	208
ENSMUSG00000101324	0	3	4	1	2	2	0
ENSMUSG00000050711	8	3	3	6	4	2	9
ENSMUSG00000054702	109	123	141	133	74	125	125
ENSMUSG00000073643	2231	2050	2570	2236	1620	2088	1595
ENSMUSG00000026248	1430	1555	1815	1771	941	1766	1553
ENSMUSG00000026249	10165	8749	11832	10732	10085	13349	10236
ENSMUSG00000099552	1	0	0	0	0	0	3
ENSMUSG00000043230	90	65	98	83	60	49	27
ENSMUSG00000101257	0	0	1	0	0	0	0
ENSMUSG00000004364	7365	7446	8355	8008	4497	8309	7070
ENSMUSG00000101722	3	2	2	2	0	0	0
ENSMUSG00000101483	0	0	0	0	0	0	0
ENSMUSG00000110100	0	0	0	0	0	0	0
ENSMUSG00000038608	959	651	915	778	963	1108	553
ENSMUSG00000054976	9	1	11	4	5	1	1
ENSMUSG00000055980	1514	1211	1866	1825	1246	1216	906
ENSMUSG00000022591	0	0	0	0	0	0	0
ENSMUSG00000026142	657	570	653	621	491	647	560
ENSMUSG00000100786	0	1	0	0	1	0	0
ENSMUSG00000067158	1083	918	1353	1459	1107	1146	1206
ENSMUSG00000079465	266	187	309	269	237	253	247
ENSMUSG00000026150	3903	4106	4613	4276	3145	4041	3242
ENSMUSG00000026149	1	0	2	0	2	0	4
ENSMUSG00000114299	1	0	0	0	1	1	0
ENSMUSG00000100170	0	0	0	0	0	0	0
ENSMUSG00000026159	3705	3357	4188	4195	2645	3834	2822
ENSMUSG00000113880	1	3	3	2	4	3	1
ENSMUSG00000113973	0	0	0	0	0	0	0
ENSMUSG00000113846	0	0	0	0	0	0	0
ENSMUSG00000113084	0	0	0	0	0	0	0
ENSMUSG00000113925	0	0	0	0	0	0	0
ENSMUSG00000114011	0	0	0	0	0	0	0
ENSMUSG00000113097	0	0	0	0	0	0	0
ENSMUSG00000038496	37	37	55	38	37	58	31
ENSMUSG00000100190	0	2	0	0	1	0	0
ENSMUSG00000113267	0	0	0	0	0	0	0
ENSMUSG00000104423	0	0	0	0	0	0	0
ENSMUSG00000101315	0	0	0	0	2	0	0
ENSMUSG00000026166	1	0	3	4	0	2	1
ENSMUSG00000053161	2	1	3	0	2	0	1
ENSMUSG00000026163	990	1019	1044	912	462	630	294
ENSMUSG00000100580	0	0	0	0	0	0	0
ENSMUSG00000045658	192	152	238	167	236	134	167
ENSMUSG00000036766	22	10	34	19	25	17	49
ENSMUSG00000026219	23089	20666	24774	23854	16528	26554	18659
ENSMUSG00000073633	158	168	176	163	87	150	110
ENSMUSG00000026220	29	26	25	40	11	14	5
ENSMUSG00000052477	0	1	0	0	1	0	0
ENSMUSG00000089844	21	13	26	18	8	11	9
ENSMUSG00000073631	0	0	0	0	0	0	0
ENSMUSG00000072109	0	0	1	0	0	0	0
ENSMUSG00000090252	0	0	0	1	0	0	0
ENSMUSG00000089652	0	0	0	0	0	0	0
ENSMUSG00000089714	4	9	14	3	1	7	2
ENSMUSG00000094127	0	0	0	0	0	0	0
ENSMUSG00000070034	15	19	33	13	35	27	21
ENSMUSG00000090103	0	0	0	0	0	0	0
ENSMUSG00000070031	93	79	122	86	76	56	48
ENSMUSG00000073628	0	0	0	0	0	0	1
ENSMUSG00000090246	1	0	0	1	3	0	1
ENSMUSG00000026222	31	17	22	11	16	11	14
ENSMUSG00000052760	166	147	215	200	189	186	129
ENSMUSG00000100217	0	0	0	0	0	0	0
ENSMUSG00000036707	5460	5166	6320	6360	3685	5624	4198
ENSMUSG00000026223	12497	10204	14572	11081	10762	11888	8800
ENSMUSG00000026224	10	4	15	2	1	1	3
ENSMUSG00000099767	3	1	0	0	0	0	0
ENSMUSG00000049608	15	7	17	9	6	3	0
ENSMUSG00000100108	1	2	0	0	0	4	0
ENSMUSG00000026226	1	1	0	0	0	0	0
ENSMUSG00000026227	23	11	22	16	27	4	10
ENSMUSG00000026229	8988	9708	10865	10785	5442	11080	9003
ENSMUSG00000026228	9	11	8	17	10	10	5
ENSMUSG00000094638	2	0	0	0	5	0	0
ENSMUSG00000062590	908	945	1164	972	795	1113	790
ENSMUSG00000087538	1	3	1	1	1	0	0
ENSMUSG00000079445	431	529	486	475	334	509	344
ENSMUSG00000099644	0	0	0	0	0	0	0
ENSMUSG00000026234	47794	52283	55217	58768	27784	60923	53008
ENSMUSG00000026237	0	0	0	0	3	0	2
ENSMUSG00000036574	0	0	0	4	0	0	0
ENSMUSG00000026238	80968	90811	89712	90971	60169	95747	71854
ENSMUSG00000026239	1675	1731	1871	1807	1404	1835	1240
ENSMUSG00000026240	1829	1681	2110	2042	1317	2100	1585
ENSMUSG00000026241	872	624	707	619	670	639	656
ENSMUSG00000053333	1540	1453	1798	1489	1267	1728	1307
ENSMUSG00000099401	1	0	0	0	0	0	0
ENSMUSG00000101625	0	1	0	1	6	0	0
ENSMUSG00000026246	14	13	18	22	30	42	15
ENSMUSG00000079440	0	0	0	0	0	0	0
ENSMUSG00000036500	0	0	1	0	0	0	0
ENSMUSG00000099839	0	0	0	0	2	0	0
ENSMUSG00000026247	29	9	47	20	81	8	9
ENSMUSG00000036480	10	7	7	5	27	1	16
ENSMUSG00000026251	0	1	6	11	7	4	12
ENSMUSG00000026253	1	7	16	0	7	6	51
ENSMUSG00000026254	5176	4989	6120	6010	4078	6166	4349
ENSMUSG00000026255	859	561	721	571	896	979	690
ENSMUSG00000089821	0	0	0	0	0	0	0
ENSMUSG00000048000	6312	5566	6627	6673	5129	7602	5609
ENSMUSG00000079436	2	1	0	2	4	0	3
ENSMUSG00000026258	3	1	1	2	4	3	2
ENSMUSG00000026259	207	200	289	207	202	258	164
ENSMUSG00000079434	0	1	2	3	2	0	1
ENSMUSG00000026288	462	457	556	481	398	651	493
ENSMUSG00000026289	1521	1558	1913	1751	1578	1973	1417
ENSMUSG00000056055	8	13	10	14	12	11	6
ENSMUSG00000070738	5229	5146	6447	5844	4644	7469	5816
ENSMUSG00000101942	1	1	3	3	3	2	1
ENSMUSG00000005501	3213	3223	3617	3423	2599	3386	2417
ENSMUSG00000090165	0	0	2	0	0	0	0
ENSMUSG00000090175	1	0	0	1	0	0	0
ENSMUSG00000089675	0	0	0	0	0	1	0
ENSMUSG00000090124	24	18	23	11	22	10	14
ENSMUSG00000090145	1	2	1	0	0	0	0
ENSMUSG00000054545	3	0	0	0	0	0	2
ENSMUSG00000089943	0	0	0	0	0	0	0
ENSMUSG00000090171	0	0	0	0	0	0	0
ENSMUSG00000081984	261	209	279	313	172	285	152
ENSMUSG00000089960	0	0	0	0	0	0	0
ENSMUSG00000079429	496	517	569	515	471	524	305
ENSMUSG00000044783	9123	9723	10621	10561	8690	10992	6939
ENSMUSG00000036251	4	1	0	2	0	1	3
ENSMUSG00000085420	0	0	0	0	0	0	0
ENSMUSG00000026295	24	0	31	12	2	0	4
ENSMUSG00000099553	0	0	1	0	0	1	5
ENSMUSG00000100908	0	0	0	0	0	0	0
ENSMUSG00000062310	0	0	0	0	0	0	0
ENSMUSG00000100798	0	0	0	1	0	2	0
ENSMUSG00000100367	0	0	0	0	1	0	0
ENSMUSG00000049866	1526	1345	1771	1406	1388	1306	954
ENSMUSG00000097398	0	3	3	2	0	2	6
ENSMUSG00000099848	0	0	1	0	0	0	0
ENSMUSG00000099378	0	0	0	0	0	0	0
ENSMUSG00000036206	2603	2528	3222	3067	2661	3267	2665
ENSMUSG00000101288	0	0	0	0	0	0	0
ENSMUSG00000099938	0	0	0	0	0	0	0
ENSMUSG00000055013	7198	5944	8270	8325	5779	8374	5380
ENSMUSG00000034486	15	20	38	25	3	42	24
ENSMUSG00000067081	1	0	0	0	0	2	0
ENSMUSG00000026301	2	4	6	3	4	4	1
ENSMUSG00000100850	0	0	3	1	0	0	0
ENSMUSG00000044337	1109	697	1225	843	777	848	531
ENSMUSG00000101951	3	0	0	2	1	0	1
ENSMUSG00000101028	10	7	8	7	8	10	6
ENSMUSG00000101997	0	3	3	4	2	0	3
ENSMUSG00000034432	3896	4060	4971	4479	2996	5036	4123
ENSMUSG00000056128	1	0	0	1	1	0	4
ENSMUSG00000048126	10229	7309	10244	7809	14501	12041	9601
ENSMUSG00000026303	123	121	166	122	41	159	194
ENSMUSG00000090550	2	0	1	0	0	0	1
ENSMUSG00000026304	21	19	49	11	24	3	14
ENSMUSG00000100791	0	0	0	0	0	0	0
ENSMUSG00000026305	2657	2868	2857	2956	1528	4215	4057
ENSMUSG00000070732	509	855	765	736	70	966	1165
ENSMUSG00000034353	45	38	42	62	42	52	35
ENSMUSG00000034343	1619	1861	2159	2060	1307	2093	1588
ENSMUSG00000097285	1	5	4	6	0	1	3
ENSMUSG00000026307	473	296	446	345	380	293	282
ENSMUSG00000090322	0	2	0	2	7	0	3
ENSMUSG00000049515	28	47	49	29	44	49	21
ENSMUSG00000026308	86	50	79	74	104	106	82
ENSMUSG00000047443	94	74	131	118	97	105	85
ENSMUSG00000026309	2950	3361	3775	3457	2628	3801	2740
ENSMUSG00000100253	0	0	0	0	0	0	0
ENSMUSG00000067071	1481	1334	1551	1345	799	1233	1037
ENSMUSG00000055866	838	641	957	772	535	529	400
ENSMUSG00000100151	257	208	154	149	126	91	79
ENSMUSG00000034292	878	845	1099	1035	702	1086	880
ENSMUSG00000026311	844	717	993	958	853	872	583
ENSMUSG00000101705	13	8	14	18	10	6	12
ENSMUSG00000100980	23	21	44	22	15	10	10
ENSMUSG00000007805	155	79	202	107	166	81	100
ENSMUSG00000026313	1992	1639	2262	2095	1594	1871	1244
ENSMUSG00000096941	0	0	0	0	0	0	0
ENSMUSG00000101265	0	0	0	0	0	0	0
ENSMUSG00000026260	4817	4451	5690	4896	3133	5434	4285
ENSMUSG00000067064	0	0	0	0	0	0	0
ENSMUSG00000057464	0	0	0	0	0	0	0
ENSMUSG00000042849	0	0	0	0	0	0	0
ENSMUSG00000058904	0	0	0	0	0	0	0
ENSMUSG00000097001	0	0	0	0	0	0	0
ENSMUSG00000046300	0	0	0	0	0	0	0
ENSMUSG00000062497	0	0	0	0	0	1	1
ENSMUSG00000063583	0	0	0	0	0	0	0
ENSMUSG00000061616	0	0	0	1	0	0	0
ENSMUSG00000073616	1556	2027	1785	1613	1001	1227	945
ENSMUSG00000044055	0	5	3	1	2	6	2
ENSMUSG00000100546	0	0	0	0	0	0	0
ENSMUSG00000099665	0	0	0	0	0	0	0
ENSMUSG00000100781	0	1	0	0	2	0	0
ENSMUSG00000034220	9475	7932	11106	10430	9784	11702	8370
ENSMUSG00000101995	2	0	0	2	9	3	3
ENSMUSG00000034212	27	17	21	38	21	41	20
ENSMUSG00000047067	264	312	411	346	176	246	220
ENSMUSG00000097251	24	24	30	22	22	13	16
ENSMUSG00000026269	2587	2029	2893	2686	2683	2714	1977
ENSMUSG00000100632	3	4	10	6	3	6	0
ENSMUSG00000026270	1009	1131	1262	1099	1070	1154	921
ENSMUSG00000026271	15	10	20	14	8	17	12
ENSMUSG00000045091	55	43	70	41	86	52	38
ENSMUSG00000014602	1381	1074	1250	910	1032	746	536
ENSMUSG00000101378	0	0	0	0	0	0	0
ENSMUSG00000026272	0	0	0	0	0	0	1
ENSMUSG00000034159	14	17	14	14	23	5	9
ENSMUSG00000084989	138	132	171	143	159	111	115
ENSMUSG00000047793	2425	1800	2735	1895	4180	1921	1256
ENSMUSG00000026273	767	821	906	733	506	814	648
ENSMUSG00000101172	4	7	11	2	4	4	1
ENSMUSG00000026274	2273	2526	2684	2725	1650	3027	2431
ENSMUSG00000026275	3161	3166	3794	3706	2238	3947	2801
ENSMUSG00000034107	14	20	10	18	21	9	19
ENSMUSG00000034088	34085	28847	36966	35155	25305	40528	28796
ENSMUSG00000026276	142	161	133	141	148	132	89
ENSMUSG00000116048	0	0	0	0	0	0	0
ENSMUSG00000034066	673	442	666	649	550	668	334
ENSMUSG00000026277	5895	5198	7272	5838	5227	6348	5113
ENSMUSG00000100927	2	1	3	2	4	2	1
ENSMUSG00000026278	2481	2496	3158	2857	2164	2469	1511
ENSMUSG00000026279	1469	1531	1940	1760	1268	1838	1491
ENSMUSG00000101952	3	7	4	8	0	4	3
ENSMUSG00000026280	2973	3063	3899	3363	2880	3753	2911
ENSMUSG00000026281	4207	4901	5239	5527	3235	4920	3640
ENSMUSG00000026283	1933	1986	2231	2201	1327	2196	1520
ENSMUSG00000073609	780	735	892	780	865	951	687
ENSMUSG00000094651	2	0	10	4	4	5	1
ENSMUSG00000093805	16	9	6	8	5	8	7
ENSMUSG00000073608	4	0	2	7	1	3	1
ENSMUSG00000034000	0	0	0	0	0	0	0
ENSMUSG00000026285	21	12	15	18	45	19	12
ENSMUSG00000100518	0	0	0	0	0	0	0
ENSMUSG00000051185	844	814	961	907	653	808	607
ENSMUSG00000040710	363	242	439	327	320	307	232
ENSMUSG00000100777	0	0	0	0	0	0	0
ENSMUSG00000100062	0	0	0	0	0	0	0
ENSMUSG00000100336	0	0	0	0	0	0	0
ENSMUSG00000100589	0	0	0	0	0	0	0
ENSMUSG00000040693	49	70	75	155	3	109	90
ENSMUSG00000097814	40	57	42	82	6	66	68
ENSMUSG00000100454	25	19	18	27	13	13	14
ENSMUSG00000026331	0	0	0	0	0	0	0
ENSMUSG00000044768	658	628	867	713	472	650	477
ENSMUSG00000040648	4342	4048	4870	4743	2911	4040	2635
ENSMUSG00000026333	403	474	499	480	246	435	415
ENSMUSG00000026335	6266	6153	7917	7156	5981	6155	4596
ENSMUSG00000100182	16	16	10	9	21	15	7
ENSMUSG00000100711	0	0	0	0	0	0	0
ENSMUSG00000026336	0	0	0	0	0	0	0
ENSMUSG00000100009	0	3	2	1	0	0	0
ENSMUSG00000067028	10	14	27	12	17	0	2
ENSMUSG00000100684	0	0	0	0	0	0	0
ENSMUSG00000099375	0	0	0	0	4	0	0
ENSMUSG00000050840	37	42	49	38	19	33	18
ENSMUSG00000089866	0	0	0	0	0	0	0
ENSMUSG00000099669	0	0	0	0	0	0	0
ENSMUSG00000047496	373	366	387	378	230	214	177
ENSMUSG00000097482	9	8	5	7	8	6	0
ENSMUSG00000056536	2300	2226	2717	2318	1679	1979	1438
ENSMUSG00000026319	2074	2127	2442	2322	1341	2225	1721
ENSMUSG00000026321	16	17	37	19	21	12	13
ENSMUSG00000099843	57	33	51	36	20	36	18
ENSMUSG00000038866	1396	1272	1591	1615	838	1803	1198
ENSMUSG00000101583	7	5	5	2	3	4	0
ENSMUSG00000044340	1528	1282	1628	1407	1466	1597	1079
ENSMUSG00000100247	0	0	0	0	0	0	0
ENSMUSG00000057329	1563	1426	1978	1773	1344	1639	1111
ENSMUSG00000054006	1	0	1	0	3	2	0
ENSMUSG00000009905	805	810	1037	949	748	842	641
ENSMUSG00000009907	4622	4488	5188	4802	3320	4396	3454
ENSMUSG00000067006	5	9	14	4	7	7	4
ENSMUSG00000059956	3	0	1	2	0	2	1
ENSMUSG00000048775	0	0	0	0	0	0	0
ENSMUSG00000044594	0	0	0	0	0	0	0
ENSMUSG00000058017	0	0	0	0	0	0	0
ENSMUSG00000073602	0	0	0	0	0	0	0
ENSMUSG00000073601	0	0	0	0	0	0	0
ENSMUSG00000026327	1	0	0	2	0	0	0
ENSMUSG00000087210	0	0	0	0	0	0	0
ENSMUSG00000067001	3	3	0	3	2	0	1
ENSMUSG00000062345	2	1	1	3	13	0	1
ENSMUSG00000026315	43	36	59	38	56	54	45
ENSMUSG00000086161	0	1	0	0	0	4	0
ENSMUSG00000100457	2	2	0	0	1	2	3
ENSMUSG00000026312	20	15	14	14	12	5	0
ENSMUSG00000047216	38	7	17	27	23	25	17
ENSMUSG00000101253	0	0	1	2	1	2	0
ENSMUSG00000038702	1486	1236	1715	1467	1086	1126	822
ENSMUSG00000101453	0	0	0	0	0	0	0
ENSMUSG00000097648	5	3	10	12	0	3	14
ENSMUSG00000070695	73	53	97	76	50	24	32
ENSMUSG00000094429	0	0	0	0	0	0	0
ENSMUSG00000107979	0	0	0	0	0	0	0
ENSMUSG00000100265	0	0	0	0	0	0	0
ENSMUSG00000101303	0	0	0	0	0	0	0
ENSMUSG00000100305	0	0	0	0	0	0	0
ENSMUSG00000101415	0	0	0	0	0	0	0
ENSMUSG00000100617	0	0	0	0	0	0	0
ENSMUSG00000102030	14	36	27	18	3	5	10
ENSMUSG00000026374	6533	7255	8304	7882	4353	7700	5621
ENSMUSG00000026377	2836	2826	3389	3173	1900	3170	2560
ENSMUSG00000099936	0	0	0	0	1	0	0
ENSMUSG00000064302	6549	5555	7016	6481	5918	7661	5241
ENSMUSG00000107722	4	4	4	1	1	1	2
ENSMUSG00000026380	439	335	579	551	219	678	457
ENSMUSG00000048402	4436	3497	4919	4713	3939	4674	3264
ENSMUSG00000097408	17	23	9	14	13	5	15
ENSMUSG00000099860	2	2	1	5	1	3	0
ENSMUSG00000101179	0	0	0	0	2	0	0
ENSMUSG00000037035	10210	9577	12755	12943	10466	14558	8401
ENSMUSG00000004451	6419	6065	6553	6030	4454	6521	4317
ENSMUSG00000098447	3	4	11	4	10	8	10
ENSMUSG00000098923	1663	1261	1927	1700	1517	1844	1339
ENSMUSG00000101731	17	14	15	8	14	13	4
ENSMUSG00000026383	2876	2906	3429	3356	1994	3168	2203
ENSMUSG00000026384	1790	1641	1888	1946	917	1240	863
ENSMUSG00000101224	0	2	0	1	2	1	0
ENSMUSG00000036975	681	649	778	649	459	747	544
ENSMUSG00000036962	7	11	0	2	7	4	5
ENSMUSG00000026387	7	13	0	11	11	2	8
ENSMUSG00000050777	277	233	342	252	179	175	127
ENSMUSG00000026385	3707	3918	4157	3466	1750	2916	2320
ENSMUSG00000026388	106	130	142	163	106	115	119
ENSMUSG00000026389	3119	2728	3296	2946	2491	3106	2140
ENSMUSG00000036907	69	49	102	82	141	108	74
ENSMUSG00000101275	0	0	0	0	0	0	0
ENSMUSG00000026390	2	10	6	13	7	3	1
ENSMUSG00000058665	3	2	4	0	7	2	7
ENSMUSG00000099957	0	0	0	0	0	0	0
ENSMUSG00000101386	0	0	0	0	0	0	0
ENSMUSG00000101922	0	0	0	2	0	0	0
ENSMUSG00000099336	0	0	0	0	0	0	0
ENSMUSG00000100979	0	0	0	0	0	0	0
ENSMUSG00000097881	0	5	3	1	1	2	1
ENSMUSG00000101700	0	0	0	0	1	0	0
ENSMUSG00000003721	1025	993	1028	938	862	831	654
ENSMUSG00000101791	0	0	0	0	0	0	0
ENSMUSG00000026339	2161	1802	2315	2099	1976	2492	1704
ENSMUSG00000085857	1	1	0	1	3	0	0
ENSMUSG00000050534	6	6	6	5	6	5	0
ENSMUSG00000001674	3581	3696	4375	4034	2195	4853	4163
ENSMUSG00000099960	0	1	1	2	0	1	0
ENSMUSG00000036815	95	63	87	75	88	47	73
ENSMUSG00000100851	0	0	0	0	0	0	0
ENSMUSG00000099574	0	1	0	0	0	0	0
ENSMUSG00000026341	12248	12274	14052	13785	8422	13799	10617
ENSMUSG00000102063	0	1	0	0	0	0	0
ENSMUSG00000026342	2681	2521	3037	2558	1749	1799	1445
ENSMUSG00000026343	74	60	117	76	35	66	22
ENSMUSG00000026344	11	7	10	14	14	13	6
ENSMUSG00000049690	1117	824	915	821	543	510	374
ENSMUSG00000101600	0	2	0	0	0	0	0
ENSMUSG00000036155	2319	1955	2959	2552	2489	3005	1967
ENSMUSG00000026347	2	9	3	1	2	2	9
ENSMUSG00000026348	8	8	11	4	22	12	5
ENSMUSG00000102014	29	18	34	19	19	28	19
ENSMUSG00000026349	3772	3669	4237	3806	3649	4432	3081
ENSMUSG00000051590	0	0	0	2	0	1	0
ENSMUSG00000036104	2389	2304	2781	2572	2076	2649	1959
ENSMUSG00000036086	1518	1592	1705	1687	1283	2024	1447
ENSMUSG00000099760	18	21	16	17	39	23	13
ENSMUSG00000056211	4798	4387	5051	4607	3944	5456	4106
ENSMUSG00000026353	5118	4880	5748	5444	3853	5649	4612
ENSMUSG00000026354	36	29	30	35	17	35	17
ENSMUSG00000026355	13035	13776	16226	15485	8852	17392	14418
ENSMUSG00000026356	5969	6374	6967	6744	3477	6766	5673
ENSMUSG00000045382	1137	813	1013	975	398	634	513
ENSMUSG00000097283	1	0	0	1	0	0	0
ENSMUSG00000042581	551	664	593	666	472	586	352
ENSMUSG00000086633	2	1	3	0	0	1	0
ENSMUSG00000026401	0	0	0	0	0	0	1
ENSMUSG00000087691	12	27	19	8	31	17	12
ENSMUSG00000086825	32	51	45	29	72	47	19
ENSMUSG00000026399	705	764	753	561	787	862	640
ENSMUSG00000085526	4	6	5	5	13	10	6
ENSMUSG00000042554	0	0	0	0	2	0	0
ENSMUSG00000026405	12	2	3	1	0	1	3
ENSMUSG00000101904	1	2	0	0	2	0	1
ENSMUSG00000026409	391	353	459	440	485	355	220
ENSMUSG00000046404	471	477	631	531	337	327	215
ENSMUSG00000042510	93	58	96	63	83	64	51
ENSMUSG00000099556	2	0	5	8	1	0	0
ENSMUSG00000100106	0	0	0	0	0	0	0
ENSMUSG00000026415	1	0	3	0	5	7	2
ENSMUSG00000086706	0	0	0	0	1	1	1
ENSMUSG00000026417	0	0	1	0	0	0	0
ENSMUSG00000042474	0	1	1	0	0	0	0
ENSMUSG00000026420	0	0	0	0	1	0	0
ENSMUSG00000026416	0	0	0	0	0	0	0
ENSMUSG00000016524	0	3	0	0	0	0	0
ENSMUSG00000016529	0	2	0	0	1	0	1
ENSMUSG00000016528	10120	8980	12889	11517	9619	12549	8728
ENSMUSG00000016526	389	469	493	509	227	656	529
ENSMUSG00000026427	2427	2728	3000	2752	1913	3149	2533
ENSMUSG00000026430	777	710	893	899	1036	1305	1149
ENSMUSG00000042349	230	251	296	200	320	197	141
ENSMUSG00000102027	5	0	2	0	6	1	0
ENSMUSG00000102055	6	8	6	4	1	2	2
ENSMUSG00000026425	4052	3486	4309	3911	3230	4178	2747
ENSMUSG00000055184	127	174	198	170	107	179	131
ENSMUSG00000026432	0	0	1	0	0	0	1
ENSMUSG00000004552	204	160	127	182	260	367	214
ENSMUSG00000052688	248	183	174	172	155	209	178
ENSMUSG00000042268	27	5	25	20	40	16	7
ENSMUSG00000042251	324	235	331	234	348	341	239
ENSMUSG00000013275	2848	2015	2822	2516	2148	2749	2056
ENSMUSG00000026433	342	315	324	256	293	273	211
ENSMUSG00000026434	11030	10915	13519	13656	6824	9977	6474
ENSMUSG00000026435	1500	1317	1491	1427	1121	947	747
ENSMUSG00000026436	1348	1119	1628	1559	1264	1229	771
ENSMUSG00000059149	629	504	769	684	516	526	259
ENSMUSG00000097454	0	0	0	0	0	0	0
ENSMUSG00000026437	210	222	214	182	179	134	107
ENSMUSG00000099874	0	0	0	0	0	0	0
ENSMUSG00000079330	117	184	136	111	120	82	84
ENSMUSG00000097540	3	4	7	3	6	1	2
ENSMUSG00000066936	0	0	1	0	0	0	0
ENSMUSG00000101549	0	2	2	1	0	1	0
ENSMUSG00000042115	60	61	56	31	51	11	22
ENSMUSG00000009772	933	781	1060	795	906	952	736
ENSMUSG00000100658	3	2	2	1	4	3	6
ENSMUSG00000042066	1681	1471	1840	1706	2339	2671	1592
ENSMUSG00000090079	0	1	0	0	4	0	0
ENSMUSG00000042046	2946	2613	3181	3052	2566	3148	2222
ENSMUSG00000026439	2900	2939	3348	2997	2260	3798	2908
ENSMUSG00000048174	143	116	180	146	166	138	130
ENSMUSG00000053024	39	45	36	34	45	33	27
ENSMUSG00000026442	80	89	114	83	40	97	109
ENSMUSG00000101126	0	0	0	0	0	0	0
ENSMUSG00000026443	762	561	797	518	592	386	430
ENSMUSG00000054387	4889	5758	5749	5889	4497	6289	4566
ENSMUSG00000026447	897	900	1228	1277	792	1151	647
ENSMUSG00000101102	0	0	2	0	1	1	1
ENSMUSG00000046062	6791	5952	8341	8058	4392	6921	5123
ENSMUSG00000041757	2448	2608	3022	2894	2998	2903	2001
ENSMUSG00000101693	304	278	383	378	300	425	260
ENSMUSG00000103421	2	2	3	1	3	1	1
ENSMUSG00000115958	0	2	0	0	5	0	0
ENSMUSG00000098306	3	0	2	0	1	0	0
ENSMUSG00000116158	0	0	0	0	0	0	0
ENSMUSG00000070645	11674	8200	10790	7947	10895	7207	7482
ENSMUSG00000070644	7641	6821	9184	8790	8250	10035	6760
ENSMUSG00000070643	4594	3605	5786	5733	3966	5593	3839
ENSMUSG00000090553	3745	5312	4600	4900	1998	3906	2949
ENSMUSG00000097014	6	3	2	9	1	8	0
ENSMUSG00000102976	968	889	988	994	651	728	375
ENSMUSG00000116275	0	0	0	0	0	0	0
ENSMUSG00000094410	646	549	650	766	540	541	264
ENSMUSG00000102049	0	0	0	0	0	0	0
ENSMUSG00000051998	55	73	72	51	77	63	40
ENSMUSG00000026463	11890	10037	13167	11544	11973	12846	8162
ENSMUSG00000100830	0	2	4	0	2	0	0
ENSMUSG00000010311	40	34	46	46	20	33	24
ENSMUSG00000090208	2	0	0	0	1	2	0
ENSMUSG00000041577	110	87	131	88	64	61	63
ENSMUSG00000100987	5	7	11	11	9	4	6
ENSMUSG00000041559	1230	1280	1482	1327	938	1217	1078
ENSMUSG00000020423	2224	2082	2213	2213	1122	1736	1138
ENSMUSG00000026450	72	69	87	77	76	117	60
ENSMUSG00000064246	18	26	34	27	14	23	30
ENSMUSG00000042451	6	6	22	10	34	12	109
ENSMUSG00000042429	1940	1688	2126	2061	2164	2987	2057
ENSMUSG00000026459	33	21	102	30	68	7	287
ENSMUSG00000026458	431	448	460	364	444	340	362
ENSMUSG00000042305	3434	3746	4242	4149	2438	4118	3106
ENSMUSG00000050526	0	1	1	0	0	0	1
ENSMUSG00000026456	1440	1486	1765	1475	1268	1828	1412
ENSMUSG00000026457	5340	5444	6714	5940	4275	6399	4707
ENSMUSG00000101061	0	0	0	0	0	5	0
ENSMUSG00000026455	1884	2181	2349	2382	1331	2474	1967
ENSMUSG00000042229	1351	1300	1690	1469	939	1437	1120
ENSMUSG00000046367	4	4	5	6	5	9	2
ENSMUSG00000042207	12694	11877	14021	12229	10314	14323	11153
ENSMUSG00000097435	1	1	2	1	0	0	0
ENSMUSG00000026452	276	213	295	173	328	314	228
ENSMUSG00000073557	1878	1578	1816	1559	1545	1730	1206
ENSMUSG00000101168	0	0	0	5	1	0	0
ENSMUSG00000026429	525	756	693	702	289	830	649
ENSMUSG00000042793	52	88	99	95	56	53	38
ENSMUSG00000097988	1393	1036	1535	1492	1180	1279	907
ENSMUSG00000031506	78	72	103	89	106	56	65
ENSMUSG00000026426	2031	1862	2461	2146	1864	2088	1593
ENSMUSG00000085311	6	12	14	6	17	14	8
ENSMUSG00000026424	0	0	3	1	0	0	0
ENSMUSG00000097680	15	7	13	7	23	10	4
ENSMUSG00000003051	155	170	188	131	112	152	119
ENSMUSG00000041926	1248	1082	1437	1285	1292	1492	1026
ENSMUSG00000062580	2260	2210	2634	2436	1565	2601	1911
ENSMUSG00000048096	46	44	73	40	76	69	64
ENSMUSG00000041889	758	606	841	696	490	655	447
ENSMUSG00000041879	11155	10474	13571	12878	9524	13523	9484
ENSMUSG00000009418	8495	6343	8120	7645	9254	10352	6133
ENSMUSG00000054412	30	18	16	15	21	24	11
ENSMUSG00000090399	122	84	123	122	132	188	72
ENSMUSG00000026421	7968	7507	9006	8225	5791	7153	5654
ENSMUSG00000041801	2021	2028	2765	2543	1754	2275	1437
ENSMUSG00000026418	941	1236	1613	1377	1062	1321	1014
ENSMUSG00000041782	103	62	91	75	104	103	46
ENSMUSG00000026414	148	109	103	144	452	470	505
ENSMUSG00000026413	3	0	3	0	2	0	0
ENSMUSG00000051985	14	14	21	13	12	8	9
ENSMUSG00000026411	4230	3871	5061	4261	3333	3537	2667
ENSMUSG00000097918	1	6	2	1	1	1	0
ENSMUSG00000026407	22	18	27	16	16	21	61
ENSMUSG00000102717	0	0	0	0	0	0	0
ENSMUSG00000041642	2588	1947	2517	2042	2300	2225	1562
ENSMUSG00000087230	0	2	3	1	6	4	0
ENSMUSG00000041605	293	271	367	294	222	381	327
ENSMUSG00000097315	0	0	0	0	0	0	0
ENSMUSG00000103594	0	0	0	0	0	0	0
ENSMUSG00000102941	0	0	0	0	1	0	0
ENSMUSG00000097433	5	4	14	5	15	9	5
ENSMUSG00000052759	0	0	0	0	0	1	0
ENSMUSG00000041570	3804	3157	4360	3974	3372	4367	2977
ENSMUSG00000026404	811	813	1042	966	620	947	704
ENSMUSG00000041498	1544	1641	1849	1924	1121	1964	1443
ENSMUSG00000104414	0	1	0	3	0	4	3
ENSMUSG00000104509	0	3	0	0	0	0	0
ENSMUSG00000104366	0	0	0	1	0	0	0
ENSMUSG00000097229	1	0	6	0	0	0	1
ENSMUSG00000041483	2803	2603	3297	3202	1480	2629	2255
ENSMUSG00000097113	23	27	37	27	14	50	29
ENSMUSG00000097448	6	7	15	17	2	11	5
ENSMUSG00000026398	337	387	434	425	86	645	542
ENSMUSG00000098045	0	2	0	1	3	1	0
ENSMUSG00000098145	1	0	0	2	0	0	0
ENSMUSG00000098206	10	11	13	10	23	13	8
ENSMUSG00000026395	82	46	68	38	76	63	53
ENSMUSG00000099459	0	0	0	0	0	0	0
ENSMUSG00000026394	0	0	0	0	0	0	0
ENSMUSG00000026393	3039	2928	3312	2966	2053	2733	2074
ENSMUSG00000099510	0	0	0	0	0	0	0
ENSMUSG00000100459	0	0	0	0	1	0	0
ENSMUSG00000019230	10806	10093	10219	11474	5844	9137	5264
ENSMUSG00000079283	540	550	698	675	478	545	386
ENSMUSG00000099808	0	0	0	0	0	0	0
ENSMUSG00000056268	1513	1340	1596	1570	1089	1451	996
ENSMUSG00000063681	25	13	22	18	27	32	13
ENSMUSG00000103844	1	2	0	1	0	0	0
ENSMUSG00000102661	0	0	0	0	0	0	0
ENSMUSG00000033964	3140	2653	3215	3264	1751	2322	1510
ENSMUSG00000033952	5380	4740	5931	6366	4203	6266	3745
ENSMUSG00000026368	0	1	0	1	6	0	0
ENSMUSG00000057037	0	0	0	3	0	0	0
ENSMUSG00000070594	0	1	1	1	1	0	0
ENSMUSG00000033898	0	8	4	0	0	0	0
ENSMUSG00000026365	3808	2058	4741	2597	3009	1712	1687
ENSMUSG00000052726	100	39	107	62	133	48	42
ENSMUSG00000102368	0	0	0	0	0	0	0
ENSMUSG00000026361	3338	3270	3608	3683	2202	4170	3148
ENSMUSG00000033849	9	7	8	0	10	6	6
ENSMUSG00000018196	1240	1406	1529	1419	918	1739	1346
ENSMUSG00000018199	3217	3039	3306	3043	1977	2650	1700
ENSMUSG00000018189	1538	1774	1819	1980	942	1920	1454
ENSMUSG00000026360	2419	2366	2836	2471	2535	3027	2286
ENSMUSG00000051079	0	0	0	0	0	0	0
ENSMUSG00000026358	0	1	0	0	0	0	1
ENSMUSG00000098509	0	0	0	0	0	0	0
ENSMUSG00000026357	4	11	20	14	22	2	14
ENSMUSG00000099964	1	8	3	7	0	1	0
ENSMUSG00000035131	10	3	4	2	5	1	8
ENSMUSG00000085822	0	0	0	0	0	0	0
ENSMUSG00000099629	0	0	0	0	0	0	0
ENSMUSG00000102074	0	0	0	0	0	0	0
ENSMUSG00000101011	0	0	0	0	0	0	0
ENSMUSG00000056220	3316	3023	3239	3192	2386	2885	2016
ENSMUSG00000032487	5	15	4	7	16	4	2
ENSMUSG00000097754	2	0	0	0	0	2	1
ENSMUSG00000006007	0	0	0	0	0	0	0
ENSMUSG00000099447	0	0	0	0	0	0	0
ENSMUSG00000006010	1734	1575	1844	1473	1185	1466	1215
ENSMUSG00000006005	14861	13427	15125	15736	11066	18783	12426
ENSMUSG00000006014	11	13	25	11	15	10	10
ENSMUSG00000066842	8312	6911	6673	8114	7410	8010	3506
ENSMUSG00000093650	1	2	0	3	13	7	3
ENSMUSG00000099622	3	1	3	4	1	5	2
ENSMUSG00000102095	1	0	0	1	1	0	0
ENSMUSG00000114212	4	3	7	3	3	10	4
ENSMUSG00000114943	2	1	3	1	0	1	1
ENSMUSG00000114694	0	0	1	0	0	4	0
ENSMUSG00000114582	1	0	0	0	0	2	0
ENSMUSG00000114591	3	0	1	0	0	0	0
ENSMUSG00000100954	232	232	365	241	190	307	179
ENSMUSG00000023150	15947	14827	17157	16742	10526	16219	12002
ENSMUSG00000052748	1484	1636	1659	1549	849	1626	1511
ENSMUSG00000053286	1766	1670	1973	1799	1385	2245	1721
ENSMUSG00000026484	7498	6919	8103	7413	4145	6602	5400
ENSMUSG00000100357	0	0	0	0	0	0	0
ENSMUSG00000026483	5111	3002	3723	2940	3710	2787	2637
ENSMUSG00000100594	87	76	91	76	48	77	71
ENSMUSG00000043019	6063	4764	6317	5951	4418	5607	4134
ENSMUSG00000032666	2635	2399	2853	2413	2445	2902	2473
ENSMUSG00000100685	0	1	0	0	0	0	0
ENSMUSG00000014980	1407	1522	1657	1572	929	1308	849
ENSMUSG00000032649	289	219	253	256	252	214	166
ENSMUSG00000026482	4054	3555	4852	3962	4059	4342	3408
ENSMUSG00000055547	0	1	0	2	1	0	0
ENSMUSG00000008475	4933	4616	5520	5397	3449	5089	3841
ENSMUSG00000026480	387	287	422	288	291	300	242
ENSMUSG00000042772	4362	3963	5142	4839	3748	5576	4334
ENSMUSG00000042751	38	29	33	44	31	29	46
ENSMUSG00000099969	2	4	5	4	0	0	0
ENSMUSG00000026479	422	200	460	172	299	196	233
ENSMUSG00000026478	17752	12929	18192	16523	15643	17413	11357
ENSMUSG00000042708	34	32	26	27	21	59	38
ENSMUSG00000042699	22311	21717	26054	25698	14905	25558	19765
ENSMUSG00000042684	764	664	893	699	606	873	619
ENSMUSG00000042671	32	29	28	30	27	26	19
ENSMUSG00000100945	0	0	0	0	0	0	0
ENSMUSG00000100334	1	4	1	3	1	4	1
ENSMUSG00000026475	290	253	342	312	271	399	426
ENSMUSG00000099568	0	0	1	2	1	0	0
ENSMUSG00000066800	1112	933	1271	776	1552	969	878
ENSMUSG00000042641	3	2	3	2	0	0	6
ENSMUSG00000045968	18	20	40	15	20	19	17
ENSMUSG00000043282	0	0	2	0	0	0	0
ENSMUSG00000047053	0	4	0	1	0	1	0
ENSMUSG00000026473	11985	6690	13915	7699	6508	8468	8700
ENSMUSG00000100014	0	1	0	0	0	0	0
ENSMUSG00000101903	0	0	0	2	0	2	1
ENSMUSG00000100502	0	0	0	0	0	0	0
ENSMUSG00000100627	0	3	0	1	0	0	1
ENSMUSG00000066797	19	30	50	41	12	19	25
ENSMUSG00000099933	0	0	0	0	0	0	0
ENSMUSG00000100221	0	0	0	0	0	0	0
ENSMUSG00000004110	203	150	186	156	198	102	36
ENSMUSG00000101880	2	0	0	0	0	0	1
ENSMUSG00000096950	15	21	20	29	22	28	14
ENSMUSG00000056708	2438	2419	3140	3113	2184	2922	1804
ENSMUSG00000026471	828	699	863	736	631	571	489
ENSMUSG00000026470	3668	3225	4278	3695	3408	3841	2849
ENSMUSG00000033722	5745	4794	6127	6170	5040	5772	3794
ENSMUSG00000103670	42	30	28	32	50	57	28
ENSMUSG00000026469	4578	3591	4746	4069	3382	4090	2876
ENSMUSG00000073535	18	27	21	16	13	10	11
ENSMUSG00000033701	2350	2577	2984	2705	1897	2939	2172
ENSMUSG00000026468	8	7	7	3	6	7	2
ENSMUSG00000033684	4832	4195	5155	4286	3884	3469	2636
ENSMUSG00000102558	3	0	1	2	1	0	1
ENSMUSG00000033671	4778	4015	4535	4653	4113	4988	2893
ENSMUSG00000026466	4073	3213	4741	4111	3504	4089	3310
ENSMUSG00000050565	9242	8625	10922	9545	6275	9184	7069
ENSMUSG00000015484	97	86	94	73	51	72	62
ENSMUSG00000060985	488	729	703	679	78	1222	1483
ENSMUSG00000103705	0	0	2	0	0	0	0
ENSMUSG00000026602	22	5	62	7	3	12	10
ENSMUSG00000026601	31	33	43	33	54	30	22
ENSMUSG00000078193	171	296	207	206	64	165	124
ENSMUSG00000026600	6748	6271	7883	6951	5027	5620	3740
ENSMUSG00000101523	63	75	102	95	81	106	84
ENSMUSG00000026596	4909	5141	5991	6295	2974	6833	4481
ENSMUSG00000060519	338	402	437	484	146	572	656
ENSMUSG00000033557	5034	4160	5532	5266	4011	5692	4177
ENSMUSG00000026594	11068	9458	12161	11718	7401	11345	7794
ENSMUSG00000033544	78	41	78	75	94	83	171
ENSMUSG00000101905	21	14	18	29	15	21	17
ENSMUSG00000101768	2	0	1	0	0	0	0
ENSMUSG00000026592	3	0	3	5	4	0	0
ENSMUSG00000070565	2041	1776	2326	2222	1363	2323	1793
ENSMUSG00000033488	1011	809	1104	785	892	942	766
ENSMUSG00000087093	1	0	2	5	4	1	0
ENSMUSG00000026589	536	427	489	449	342	360	262
ENSMUSG00000004031	28	14	15	29	12	34	23
ENSMUSG00000026587	126	78	157	95	228	107	142
ENSMUSG00000103971	0	0	0	0	0	0	0
ENSMUSG00000073530	463	316	485	361	488	240	285
ENSMUSG00000047661	0	0	0	0	0	0	2
ENSMUSG00000104014	0	0	0	0	0	0	0
ENSMUSG00000040782	4092	3887	4704	4135	2620	4130	3239
ENSMUSG00000015829	21	6	4	4	1	0	4
ENSMUSG00000103719	0	0	0	0	0	0	0
ENSMUSG00000104111	0	0	0	2	0	0	0
ENSMUSG00000090394	121	87	112	66	77	87	66
ENSMUSG00000026729	1	0	0	0	1	0	0
ENSMUSG00000026725	13	8	13	10	10	52	14
ENSMUSG00000058267	1365	1538	1676	1687	844	1355	1058
ENSMUSG00000014226	6006	7503	7054	7800	2910	7937	7280
ENSMUSG00000026721	1152	886	1079	893	825	760	692
ENSMUSG00000104302	0	0	0	0	0	0	0
ENSMUSG00000102852	0	0	0	1	0	0	1
ENSMUSG00000103631	0	0	0	0	0	0	0
ENSMUSG00000040423	2756	2471	3400	2856	1726	2418	1515
ENSMUSG00000026715	3	8	15	9	9	10	13
ENSMUSG00000043467	1644	1455	1814	1784	1348	1333	682
ENSMUSG00000104016	3	8	4	6	15	6	0
ENSMUSG00000026709	1807	1958	2301	1977	1071	2533	2106
ENSMUSG00000102864	0	0	0	0	0	0	0
ENSMUSG00000026708	869	1071	1173	1077	657	966	760
ENSMUSG00000026705	1545	1387	1967	1755	1059	1809	1435
ENSMUSG00000044835	118	125	153	144	92	102	61
ENSMUSG00000049160	0	0	2	1	8	5	0
ENSMUSG00000026701	5870	5730	7065	5863	4947	6198	4490
ENSMUSG00000026700	2	4	0	2	0	4	0
ENSMUSG00000066755	0	2	2	7	1	0	5
ENSMUSG00000000817	0	6	0	0	0	2	2
ENSMUSG00000040297	3914	3656	4332	3723	2934	3734	2732
ENSMUSG00000103158	0	0	0	0	0	0	1
ENSMUSG00000086277	3	0	2	2	0	0	0
ENSMUSG00000026698	1150	970	1255	997	910	1104	731
ENSMUSG00000103393	0	1	2	1	2	0	0
ENSMUSG00000040265	399	326	419	317	340	310	213
ENSMUSG00000090260	16	10	7	3	12	7	12
ENSMUSG00000078190	814	797	1085	735	369	414	520
ENSMUSG00000026694	1486	1437	1869	1842	1268	1781	1431
ENSMUSG00000026696	1635	1782	1840	1549	1183	1383	1130
ENSMUSG00000026697	224	159	186	194	147	134	95
ENSMUSG00000091060	2	2	3	3	2	8	1
ENSMUSG00000040225	28104	22290	27189	27892	23094	32351	18879
ENSMUSG00000026692	59	43	40	35	23	31	24
ENSMUSG00000040181	242	89	222	92	104	64	79
ENSMUSG00000040170	165	23	146	264	163	38	12
ENSMUSG00000095576	6	2	3	1	10	4	1
ENSMUSG00000026691	2	0	0	0	0	1	0
ENSMUSG00000103288	0	0	0	0	0	0	0
ENSMUSG00000071890	0	0	0	0	0	0	0
ENSMUSG00000026586	1352	832	1779	728	1386	529	573
ENSMUSG00000092188	1	0	0	0	0	0	0
ENSMUSG00000096984	0	0	0	2	0	0	1
ENSMUSG00000040124	1006	937	1066	929	799	967	769
ENSMUSG00000101869	0	0	0	0	0	0	0
ENSMUSG00000040113	2	1	0	0	0	0	6
ENSMUSG00000026585	4512	4159	5299	4397	3194	4178	3243
ENSMUSG00000026584	1145	1037	1263	1332	1132	1455	1122
ENSMUSG00000041406	1695	1829	2013	2001	958	2130	1700
ENSMUSG00000041396	253	260	299	223	140	246	183
ENSMUSG00000026582	4	1	0	3	0	0	0
ENSMUSG00000026581	2	0	1	4	12	2	1
ENSMUSG00000026580	3	4	1	16	0	4	4
ENSMUSG00000090081	8	0	7	3	0	5	1
ENSMUSG00000086593	0	0	0	0	0	0	0
ENSMUSG00000026579	32	20	27	30	60	31	11
ENSMUSG00000040918	672	732	795	727	338	668	486
ENSMUSG00000026578	342	424	361	371	253	416	396
ENSMUSG00000026577	939	927	1138	1118	714	1154	910
ENSMUSG00000026575	934	993	1155	1110	763	1097	854
ENSMUSG00000026576	4098	3177	4272	3547	2827	4098	2929
ENSMUSG00000104011	21	14	27	7	20	13	25
ENSMUSG00000097281	1	0	0	7	4	3	0
ENSMUSG00000103383	4	0	3	1	5	1	1
ENSMUSG00000102897	0	1	0	0	0	0	0
ENSMUSG00000102761	0	0	0	0	0	0	0
ENSMUSG00000102163	0	0	0	0	0	0	0
ENSMUSG00000026574	11	5	47	6	3	6	5
ENSMUSG00000103659	1	3	0	4	0	4	2
ENSMUSG00000026573	0	0	0	0	0	0	0
ENSMUSG00000101189	0	0	0	0	0	0	0
ENSMUSG00000102408	0	0	0	0	0	2	0
ENSMUSG00000026572	0	0	0	0	0	0	0
ENSMUSG00000040848	3245	2758	3756	3270	2956	3823	2566
ENSMUSG00000040843	1878	1943	2403	2204	1444	2087	1522
ENSMUSG00000040836	1524	1160	1649	1399	1478	1585	1092
ENSMUSG00000026571	1927	1740	2149	1766	1465	2110	1851
ENSMUSG00000026568	1293	1364	1377	1430	942	1305	816
ENSMUSG00000026567	6	11	16	26	10	18	11
ENSMUSG00000103583	2	0	0	0	2	0	0
ENSMUSG00000026566	6461	5398	7374	6197	5122	5930	4277
ENSMUSG00000040723	2582	2057	2809	2293	2996	3144	2329
ENSMUSG00000103686	3	5	16	6	9	9	2
ENSMUSG00000040713	2051	1670	1986	1932	1647	2217	1393
ENSMUSG00000104306	1	0	0	0	4	1	1
ENSMUSG00000005763	29	16	28	21	34	13	14
ENSMUSG00000102154	0	0	1	0	0	0	0
ENSMUSG00000026565	2201	1874	2289	2417	1325	2091	1204
ENSMUSG00000097196	1	1	0	0	0	0	0
ENSMUSG00000102484	0	0	0	0	0	0	0
ENSMUSG00000026564	257	292	383	363	208	317	239
ENSMUSG00000000544	35	16	43	33	32	60	28
ENSMUSG00000040629	312	631	470	472	12	782	718
ENSMUSG00000040612	1555	1173	1365	1411	1038	1096	701
ENSMUSG00000091393	2	8	5	5	4	5	5
ENSMUSG00000103400	51	49	54	76	41	67	34
ENSMUSG00000026563	965	863	1076	1081	910	1097	851
ENSMUSG00000040596	5004	3996	5293	4805	4139	4843	3340
ENSMUSG00000086056	0	0	0	0	1	0	1
ENSMUSG00000051081	0	0	0	0	0	0	0
ENSMUSG00000026560	0	0	0	0	0	0	0
ENSMUSG00000102548	0	0	0	0	1	0	1
ENSMUSG00000097823	13	15	23	18	9	8	19
ENSMUSG00000060568	202	130	211	140	155	157	196
ENSMUSG00000026558	5800	5410	6818	6441	4048	6644	4851
ENSMUSG00000103139	0	6	3	2	5	1	1
ENSMUSG00000102909	14	17	7	6	5	3	4
ENSMUSG00000052428	2384	2190	2691	2501	1617	2122	1739
ENSMUSG00000026687	3814	3451	4373	3830	3092	4140	2798
ENSMUSG00000026688	1058	1043	1248	1182	942	1133	814
ENSMUSG00000040485	8	0	7	4	1	3	3
ENSMUSG00000015843	80	102	95	73	58	56	68
ENSMUSG00000026686	122	75	65	80	87	122	48
ENSMUSG00000093538	0	0	1	0	3	0	0
ENSMUSG00000052534	13527	10956	16253	13594	8967	10292	7279
ENSMUSG00000103530	0	0	0	0	0	0	0
ENSMUSG00000026683	2506	2640	2814	2831	1690	2995	2468
ENSMUSG00000026678	823	534	776	407	611	323	439
ENSMUSG00000038530	119	62	80	51	43	39	29
ENSMUSG00000070532	5	3	3	5	22	4	4
ENSMUSG00000026675	3031	2329	2527	1886	1412	1311	1348
ENSMUSG00000097503	44	39	33	26	34	28	31
ENSMUSG00000026674	1862	967	1978	1090	2144	1031	1100
ENSMUSG00000026670	1821	1644	2074	1829	1220	1938	1469
ENSMUSG00000104266	3	3	6	6	3	4	3
ENSMUSG00000103908	0	0	1	0	0	0	0
ENSMUSG00000026667	3819	3371	4383	4128	2884	3544	2285
ENSMUSG00000044306	0	0	0	2	1	1	0
ENSMUSG00000073494	2	0	0	1	0	0	0
ENSMUSG00000102418	1	5	2	2	1	0	4
ENSMUSG00000102752	887	856	962	900	625	838	545
ENSMUSG00000038473	373	329	442	421	294	430	215
ENSMUSG00000042800	10	13	12	15	21	11	2
ENSMUSG00000038463	3032	2259	2862	2795	2229	2694	1895
ENSMUSG00000026663	2364	1938	2461	2293	1969	2227	1770
ENSMUSG00000026659	752	761	876	923	627	700	524
ENSMUSG00000096968	4	6	6	2	4	5	0
ENSMUSG00000070524	1	2	0	0	0	0	0
ENSMUSG00000038421	0	0	0	0	0	0	0
ENSMUSG00000026656	15	4	11	7	16	11	9
ENSMUSG00000103676	0	0	0	1	0	0	0
ENSMUSG00000104340	0	0	0	0	0	0	0
ENSMUSG00000059089	1	4	0	0	3	5	3
ENSMUSG00000059498	89	58	90	51	94	93	72
ENSMUSG00000026649	40	41	45	61	30	39	29
ENSMUSG00000058076	5935	6066	7337	6384	4497	6081	4487
ENSMUSG00000056569	33	26	28	36	19	18	14
ENSMUSG00000038370	2571	2312	2702	2785	1242	2045	1434
ENSMUSG00000005677	3	4	3	3	8	1	0
ENSMUSG00000005674	446	465	555	506	371	401	401
ENSMUSG00000005681	11	23	32	52	33	10	9
ENSMUSG00000058715	58	67	85	50	85	84	71
ENSMUSG00000013593	8644	8835	10290	9340	6468	9452	7223
ENSMUSG00000006403	619	495	627	450	553	390	294
ENSMUSG00000052423	1346	1209	1621	1280	1364	1397	1062
ENSMUSG00000062729	1354	1328	1740	1519	1827	1524	1054
ENSMUSG00000053483	3413	3522	4184	3534	2956	3952	3149
ENSMUSG00000062963	2191	2563	2793	2662	1717	2296	1710
ENSMUSG00000103983	136	189	119	131	128	136	129
ENSMUSG00000013973	401	441	434	434	388	518	399
ENSMUSG00000013997	1339	1308	1450	1331	1050	1369	1085
ENSMUSG00000006412	3118	3598	3793	3918	1978	4175	3505
ENSMUSG00000045259	29	24	35	29	21	18	23
ENSMUSG00000006411	26	12	29	17	21	9	7
ENSMUSG00000048865	59	59	98	51	85	104	97
ENSMUSG00000026641	3477	3581	4074	3598	2996	3866	3074
ENSMUSG00000103711	37	45	51	38	61	40	36
ENSMUSG00000097045	20	16	15	27	11	14	18
ENSMUSG00000038235	5342	4767	5983	5054	4806	5821	4479
ENSMUSG00000091993	8	1	10	7	6	5	3
ENSMUSG00000060244	146	132	169	131	123	145	106
ENSMUSG00000038209	2	3	1	5	6	3	2
ENSMUSG00000004709	7	5	4	1	5	0	0
ENSMUSG00000004707	2	7	3	3	15	7	7
ENSMUSG00000038179	0	0	0	0	0	2	0
ENSMUSG00000103219	0	0	0	0	0	0	0
ENSMUSG00000015355	6	14	10	2	11	7	6
ENSMUSG00000015316	8	4	2	15	8	4	7
ENSMUSG00000038147	25	20	37	14	42	25	17
ENSMUSG00000073492	0	3	0	2	0	1	0
ENSMUSG00000104413	0	0	0	0	0	0	0
ENSMUSG00000015314	5	3	5	4	3	5	1
ENSMUSG00000026556	2371	1983	2686	2535	2049	2287	1529
ENSMUSG00000051251	0	1	1	0	3	1	0
ENSMUSG00000003458	6920	5721	8080	6554	7146	7533	5574
ENSMUSG00000026553	21940	19481	25384	22215	17264	23982	17845
ENSMUSG00000103380	1	2	1	2	3	0	1
ENSMUSG00000003464	6807	6579	7725	6551	4853	6226	4745
ENSMUSG00000026554	9439	9088	11143	10231	8286	10953	8521
ENSMUSG00000013698	4947	3756	5095	3867	4028	4380	3083
ENSMUSG00000007122	63	59	84	44	59	79	50
ENSMUSG00000092085	0	0	3	4	8	2	1
ENSMUSG00000007107	5	4	10	6	6	5	4
ENSMUSG00000103617	0	0	0	0	0	0	0
ENSMUSG00000038034	2401	2222	2716	2192	2098	2544	2127
ENSMUSG00000007097	1554	1437	1664	1355	1128	1240	890
ENSMUSG00000038026	0	0	4	1	8	1	1
ENSMUSG00000102413	0	0	0	0	0	0	0
ENSMUSG00000044708	30	44	97	69	18	27	29
ENSMUSG00000050229	2345	2051	2842	2531	1560	2058	1318
ENSMUSG00000026548	10	10	4	5	2	8	7
ENSMUSG00000037995	1348	1391	1747	1432	1451	1275	1133
ENSMUSG00000026547	4353	3671	4752	3730	3653	5004	3360
ENSMUSG00000026546	122	73	74	100	61	86	60
ENSMUSG00000049598	5	8	7	9	11	8	4
ENSMUSG00000053318	1	2	1	1	0	1	3
ENSMUSG00000070504	0	1	3	0	0	0	0
ENSMUSG00000026544	193	154	252	198	181	157	116
ENSMUSG00000037942	88	0	104	2	5	0	60
ENSMUSG00000026542	8	0	14	0	0	0	1
ENSMUSG00000037924	0	0	0	0	0	0	0
ENSMUSG00000062527	0	0	0	0	0	0	0
ENSMUSG00000058981	0	0	0	0	0	0	0
ENSMUSG00000046643	0	0	0	0	0	0	0
ENSMUSG00000049456	0	0	0	0	0	0	0
ENSMUSG00000005339	0	0	0	0	0	0	0
ENSMUSG00000049605	0	0	0	0	0	0	0
ENSMUSG00000079180	0	0	1	0	0	0	0
ENSMUSG00000037872	20	21	25	38	45	21	20
ENSMUSG00000005338	233	250	289	247	302	186	158
ENSMUSG00000037860	240	207	296	277	211	212	161
ENSMUSG00000037849	3	0	0	0	0	0	0
ENSMUSG00000070501	0	0	0	0	0	0	0
ENSMUSG00000073491	2	0	0	0	0	1	0
ENSMUSG00000043263	6	0	0	2	1	4	2
ENSMUSG00000066677	3	0	3	0	0	2	0
ENSMUSG00000073490	34	16	35	11	33	30	17
ENSMUSG00000073489	36	16	11	11	15	16	13
ENSMUSG00000090272	38	14	14	17	18	17	31
ENSMUSG00000026536	4	6	3	4	4	2	2
ENSMUSG00000039997	42	19	32	17	40	27	19
ENSMUSG00000026535	11	11	13	8	12	25	5
ENSMUSG00000054203	2	0	0	0	0	0	4
ENSMUSG00000045381	0	1	0	0	0	1	0
ENSMUSG00000047048	0	0	0	0	0	6	0
ENSMUSG00000050134	0	0	0	0	0	0	0
ENSMUSG00000049528	0	0	0	0	0	0	0
ENSMUSG00000059371	0	0	0	0	0	0	0
ENSMUSG00000046486	0	0	0	0	0	0	0
ENSMUSG00000051528	0	0	0	0	0	0	0
ENSMUSG00000055033	1	2	2	0	2	0	2
ENSMUSG00000026532	436	248	244	258	499	596	295
ENSMUSG00000050788	0	0	1	0	0	0	0
ENSMUSG00000026531	0	0	0	0	0	0	0
ENSMUSG00000066672	0	0	0	0	0	0	0
ENSMUSG00000059503	0	0	0	0	0	0	0
ENSMUSG00000051509	0	0	0	0	0	0	0
ENSMUSG00000066671	0	0	0	0	0	0	0
ENSMUSG00000028354	259	264	322	274	246	295	225
ENSMUSG00000050069	2917	2798	3271	2786	3605	4445	3229
ENSMUSG00000026527	74	101	107	95	109	124	68
ENSMUSG00000103079	0	0	0	0	0	0	0
ENSMUSG00000026526	5300	5299	6212	6078	3857	5954	4680
ENSMUSG00000039783	9	14	9	18	16	12	8
ENSMUSG00000026525	330	270	401	337	167	248	215
ENSMUSG00000078185	1104	876	1068	1149	578	1034	590
ENSMUSG00000026523	14	18	10	27	1	26	28
ENSMUSG00000039748	2458	2731	3305	3384	1518	3630	2850
ENSMUSG00000104158	0	4	7	4	4	2	5
ENSMUSG00000055214	47	47	58	42	82	57	54
ENSMUSG00000078184	37	59	41	49	8	27	18
ENSMUSG00000104157	9	4	5	2	2	5	10
ENSMUSG00000104021	0	0	0	2	0	0	0
ENSMUSG00000057335	4528	3653	4311	4017	3383	4525	3148
ENSMUSG00000103435	0	0	6	4	3	5	0
ENSMUSG00000026504	665	563	747	624	671	705	607
ENSMUSG00000087082	0	2	0	2	4	1	1
ENSMUSG00000019699	3143	3074	3466	3082	2150	3400	3136
ENSMUSG00000097892	0	0	2	0	0	9	1
ENSMUSG00000063659	1601	1464	1884	1574	1252	1811	1297
ENSMUSG00000103043	0	0	2	0	0	0	0
ENSMUSG00000102885	1	0	0	0	0	0	0
ENSMUSG00000101746	0	0	0	0	0	0	0
ENSMUSG00000015962	0	1	2	3	0	4	0
ENSMUSG00000015961	4844	5588	6084	6113	3039	6029	4944
ENSMUSG00000091476	36	31	24	41	16	23	20
ENSMUSG00000026502	2563	2391	3124	2645	1737	2505	2008
ENSMUSG00000086350	34	17	33	43	30	38	36
ENSMUSG00000026500	32	24	25	27	53	38	21
ENSMUSG00000039630	49511	52706	57653	59650	37649	66435	48742
ENSMUSG00000026495	344	381	413	390	352	343	336
ENSMUSG00000026494	5783	6930	7146	6558	8575	8464	5314
ENSMUSG00000089713	0	0	0	0	4	0	1
ENSMUSG00000055067	922	989	1186	1133	753	1133	805
ENSMUSG00000026492	625	634	824	767	509	604	498
ENSMUSG00000038949	1292	1028	1454	1284	1337	1361	1030
ENSMUSG00000038936	1888	1987	2216	2160	1322	1937	1465
ENSMUSG00000087236	3	5	8	2	2	4	14
ENSMUSG00000026491	7191	6539	8080	7987	5319	8486	5580
ENSMUSG00000073486	5	7	2	4	2	2	3
ENSMUSG00000026490	4471	3763	4545	4430	3265	4430	3194
ENSMUSG00000026489	429	577	603	485	308	693	536
ENSMUSG00000104520	2	1	0	0	0	0	1
ENSMUSG00000010609	648	636	786	652	561	768	435
ENSMUSG00000102923	1	3	7	6	3	7	6
ENSMUSG00000038855	8077	6937	8391	7327	6609	7835	5177
ENSMUSG00000053963	41	35	60	30	31	62	60
ENSMUSG00000102608	0	0	0	0	0	0	0
ENSMUSG00000026496	20599	21535	25074	25758	13915	31762	24297
ENSMUSG00000058729	851	867	963	987	578	975	864
ENSMUSG00000026497	8	13	11	9	3	11	20
ENSMUSG00000026499	3684	3338	4057	4088	2644	4296	3166
ENSMUSG00000103649	114	75	133	111	95	101	75
ENSMUSG00000103156	8	10	5	19	10	7	6
ENSMUSG00000060743	11864	10518	13426	12324	8291	10172	7729
ENSMUSG00000097347	145	206	197	151	288	249	131
ENSMUSG00000073485	104	112	112	92	101	76	77
ENSMUSG00000038806	2612	2828	3271	3269	1901	3196	2316
ENSMUSG00000066652	1824	2505	2229	3056	275	3519	3197
ENSMUSG00000026520	2453	2981	3130	3439	1571	3581	2911
ENSMUSG00000038793	594	949	723	1031	62	1271	1322
ENSMUSG00000026519	566	667	687	690	438	903	756
ENSMUSG00000085563	1	0	5	0	3	6	5
ENSMUSG00000038776	2428	1871	1980	1786	1460	1211	1166
ENSMUSG00000038768	0	0	1	0	0	0	0
ENSMUSG00000103328	0	0	0	0	0	0	0
ENSMUSG00000026516	4601	4657	5462	5373	3712	5884	4324
ENSMUSG00000062169	1833	1566	2002	1647	1321	1788	1306
ENSMUSG00000038733	10838	10212	12447	11706	8022	11582	8427
ENSMUSG00000054135	15	18	10	12	16	9	11
ENSMUSG00000026514	13	16	12	17	0	4	16
ENSMUSG00000050625	8	6	5	16	7	9	10
ENSMUSG00000047369	25	33	34	44	9	52	42
ENSMUSG00000004880	3818	3776	4511	4545	2184	5038	3907
ENSMUSG00000056699	0	0	0	0	0	5	2
ENSMUSG00000022995	11427	9625	11653	11293	8759	12544	8947
ENSMUSG00000026511	2743	3175	3138	3251	1800	2747	2296
ENSMUSG00000091013	1	4	4	6	0	2	1
ENSMUSG00000038633	3767	2930	4213	3749	2396	3668	2925
ENSMUSG00000100147	3	2	2	0	5	3	0
ENSMUSG00000047539	2256	2215	2899	2755	1843	2853	2199
ENSMUSG00000026510	2913	2536	3406	3007	2562	3337	2582
ENSMUSG00000026509	3943	3348	4351	3473	3556	3753	2802
ENSMUSG00000102234	0	2	0	0	2	3	0
ENSMUSG00000038599	4	3	3	5	2	1	2
ENSMUSG00000102688	0	0	0	0	0	0	4
ENSMUSG00000043429	0	0	0	0	0	0	0
ENSMUSG00000038576	339	221	425	170	282	213	216
ENSMUSG00000079164	115	46	113	58	66	43	48
ENSMUSG00000104367	5	3	9	5	6	4	3
ENSMUSG00000030768	1318	1154	1660	1427	1143	1271	943
ENSMUSG00000046836	2080	1842	2474	2117	1692	2108	1508
ENSMUSG00000042901	3337	3023	3583	3315	2302	3097	2455
ENSMUSG00000056050	4555	3735	4841	4389	3806	5026	3480
ENSMUSG00000072258	706	680	747	677	687	871	546
ENSMUSG00000104212	12	5	9	7	9	9	9
ENSMUSG00000053461	16	20	20	19	24	33	8
ENSMUSG00000103451	0	0	0	0	0	0	0
ENSMUSG00000103305	0	0	0	0	0	0	0
ENSMUSG00000102743	0	0	0	0	0	0	0
ENSMUSG00000039384	77	95	117	87	97	54	64
ENSMUSG00000044854	21	29	33	31	32	14	13
ENSMUSG00000102682	0	0	0	0	0	0	0
ENSMUSG00000102794	0	0	0	0	0	0	0
ENSMUSG00000101574	0	0	0	2	0	1	0
ENSMUSG00000103308	1	1	0	1	2	0	0
ENSMUSG00000092578	0	0	0	0	0	0	0
ENSMUSG00000039377	354	288	722	289	438	337	319
ENSMUSG00000102158	0	1	0	1	1	0	1
ENSMUSG00000026621	0	3	2	3	3	3	0
ENSMUSG00000073481	2770	2879	3685	3042	2304	2975	2099
ENSMUSG00000039349	1961	1436	2521	2003	1751	2104	1430
ENSMUSG00000026620	2261	1890	2220	2113	1509	2259	1768
ENSMUSG00000102784	1	0	1	3	1	2	1
ENSMUSG00000103942	0	0	0	0	0	0	0
ENSMUSG00000103478	0	0	0	0	0	0	0
ENSMUSG00000104461	0	0	0	0	1	0	0
ENSMUSG00000039318	3093	2944	3542	3186	2436	3921	2758
ENSMUSG00000103613	2	1	9	2	0	2	6
ENSMUSG00000026618	6516	6214	7647	7142	4852	7680	5937
ENSMUSG00000104368	2	6	7	3	0	2	2
ENSMUSG00000026617	1105	1182	1394	1419	695	1663	1372
ENSMUSG00000097261	9	14	14	11	3	5	5
ENSMUSG00000026615	11762	11670	13833	13221	8139	16239	12381
ENSMUSG00000051295	4	4	0	7	1	5	2
ENSMUSG00000097615	18	15	7	9	8	8	4
ENSMUSG00000026614	30	27	32	35	49	34	14
ENSMUSG00000103799	0	0	0	0	0	0	0
ENSMUSG00000039246	612	603	639	645	372	540	385
ENSMUSG00000103449	1	0	0	0	0	0	0
ENSMUSG00000103690	0	0	0	0	0	0	0
ENSMUSG00000039239	3639	2597	3735	2741	2867	3042	2750
ENSMUSG00000100393	8	0	10	8	4	3	2
ENSMUSG00000001305	1711	2018	2097	2307	1182	2893	2375
ENSMUSG00000097784	47	58	52	41	45	61	30
ENSMUSG00000103503	0	0	0	0	0	0	0
ENSMUSG00000104312	1	1	2	0	0	1	1
ENSMUSG00000039224	68	104	88	91	11	127	110
ENSMUSG00000026611	18	20	40	21	6	25	16
ENSMUSG00000089730	0	0	0	0	5	0	0
ENSMUSG00000039210	1837	1548	2000	1892	1400	1954	1382
ENSMUSG00000104245	42	41	39	34	94	56	21
ENSMUSG00000103923	3	0	3	2	1	0	2
ENSMUSG00000026610	121	62	163	64	55	44	52
ENSMUSG00000103961	0	1	0	0	0	0	0
ENSMUSG00000103577	0	0	0	0	0	0	0
ENSMUSG00000104482	0	0	0	0	0	0	0
ENSMUSG00000026609	3	0	5	3	2	9	9
ENSMUSG00000026608	3999	3990	4694	4495	2947	5514	4637
ENSMUSG00000037624	677	471	919	687	699	740	451
ENSMUSG00000104507	12	9	9	9	18	12	13
ENSMUSG00000026605	9808	11413	10458	11457	6847	15659	9638
ENSMUSG00000026604	2430	1975	2787	2459	2337	2619	1793
ENSMUSG00000097925	9	5	4	5	11	12	4
ENSMUSG00000104435	72	92	126	84	172	136	85
ENSMUSG00000026603	1407	1478	1716	1590	1162	1838	1430
ENSMUSG00000010175	247	125	228	206	244	186	109
ENSMUSG00000099404	0	0	0	0	1	0	0
ENSMUSG00000079045	2	1	1	2	3	0	0
ENSMUSG00000103644	0	0	0	0	0	0	0
ENSMUSG00000103510	0	0	0	0	0	0	0
ENSMUSG00000103963	0	0	0	0	0	0	0
ENSMUSG00000089872	1539	1385	1763	1725	1558	1671	1213
ENSMUSG00000026634	2437	2502	2948	2788	1839	2814	2201
ENSMUSG00000037568	2923	2159	3146	2687	2119	2225	1667
ENSMUSG00000104487	0	0	0	1	0	0	0
ENSMUSG00000066595	395	338	479	357	232	330	241
ENSMUSG00000097845	0	0	0	5	4	5	0
ENSMUSG00000057072	0	4	4	7	2	3	1
ENSMUSG00000026632	269	344	391	304	279	250	170
ENSMUSG00000062510	1156	1240	1455	1449	928	1284	895
ENSMUSG00000103576	4	5	20	9	29	18	5
ENSMUSG00000026630	141	114	169	136	175	152	108
ENSMUSG00000102777	0	0	0	0	0	0	0
ENSMUSG00000091017	1	0	0	0	0	0	0
ENSMUSG00000026628	107	86	106	66	95	90	80
ENSMUSG00000073478	62	61	70	62	38	56	55
ENSMUSG00000103174	2	3	6	4	1	7	4
ENSMUSG00000037499	2332	2368	2815	2616	1993	2095	1349
ENSMUSG00000026627	3938	3015	3902	3362	3605	3755	2843
ENSMUSG00000026626	3244	2893	3961	3448	2382	3322	2613
ENSMUSG00000103114	3	3	4	3	3	3	2
ENSMUSG00000103517	0	1	0	0	0	1	0
ENSMUSG00000037474	3568	3678	4229	4405	2346	3576	2472
ENSMUSG00000037461	4842	4993	6249	5980	3486	5989	4905
ENSMUSG00000026623	3837	3247	4245	4147	2816	3886	2271
ENSMUSG00000102840	43	45	53	37	35	66	52
ENSMUSG00000026622	1934	2346	2539	2741	1423	3124	2589
ENSMUSG00000055833	47	45	36	29	60	28	28
ENSMUSG00000037434	1810	1428	1872	1622	933	1110	880
ENSMUSG00000049353	6	12	12	12	1	11	3
ENSMUSG00000097416	17	15	27	7	3	18	14
ENSMUSG00000026637	347	397	463	375	399	379	345
ENSMUSG00000097089	2	0	0	0	0	0	0
ENSMUSG00000037395	804	628	854	732	819	668	498
ENSMUSG00000097316	30	35	36	23	32	17	21
ENSMUSG00000058248	4569	3340	4638	4377	4884	5243	3452
ENSMUSG00000037375	614	482	763	608	675	621	511
ENSMUSG00000100872	2	1	0	0	0	0	1
ENSMUSG00000016262	1400	907	1457	1148	858	1185	1038
ENSMUSG00000089812	20	16	26	12	15	28	11
ENSMUSG00000016200	635	549	644	732	447	610	450
ENSMUSG00000103640	0	0	0	0	0	3	0
ENSMUSG00000016181	1328	1318	1562	1518	1126	1787	1338
ENSMUSG00000026638	109	89	136	72	87	102	68
ENSMUSG00000079144	509	507	587	543	270	501	359
ENSMUSG00000037318	11	9	25	6	22	13	17
ENSMUSG00000090080	0	1	0	0	0	0	0
ENSMUSG00000089683	0	0	0	0	0	0	0
ENSMUSG00000026639	32	16	25	22	32	11	20
ENSMUSG00000016194	9	7	7	9	8	8	8
ENSMUSG00000009633	679	568	611	506	345	369	264
ENSMUSG00000103736	0	0	0	0	0	0	0
ENSMUSG00000016179	581	567	748	544	604	560	411
ENSMUSG00000097850	0	0	1	0	0	0	1
ENSMUSG00000103692	0	1	0	0	0	0	0
ENSMUSG00000026640	2893	1693	2708	2096	2403	1679	1281
ENSMUSG00000016494	3115	2246	4105	3172	2874	3163	2295
ENSMUSG00000097325	12	11	13	12	27	18	19
ENSMUSG00000104206	0	0	0	0	1	0	0
ENSMUSG00000104077	0	0	0	0	0	0	0
ENSMUSG00000016493	73	91	104	79	101	54	48
ENSMUSG00000016481	2069	1835	2429	1986	1874	1989	1556
ENSMUSG00000026616	5	17	4	13	4	5	1
ENSMUSG00000050530	4068	3086	4942	3944	3307	3910	2887
ENSMUSG00000026643	5213	5286	5744	5539	3071	6316	4954
ENSMUSG00000049950	413	416	484	464	159	503	440
ENSMUSG00000026644	7	16	6	10	7	9	19
ENSMUSG00000026645	0	1	0	0	2	0	2
ENSMUSG00000026650	6	17	4	9	2	6	10
ENSMUSG00000026648	333	304	366	315	343	380	252
ENSMUSG00000026646	1029	1214	1390	1603	561	1451	1245
ENSMUSG00000085043	2	7	4	3	3	9	2
ENSMUSG00000109865	2804	2985	3290	3568	1600	3572	3054
ENSMUSG00000051396	456	499	594	615	366	631	411
ENSMUSG00000039496	43	60	38	41	32	52	32
ENSMUSG00000026655	1651	1357	1906	1442	1143	1214	859
ENSMUSG00000085205	0	0	0	2	0	1	0
ENSMUSG00000085656	0	0	0	0	0	0	0
ENSMUSG00000086445	0	0	0	0	0	0	0
ENSMUSG00000026657	4705	3416	4819	3931	4062	4305	3450
ENSMUSG00000084859	0	0	0	0	0	0	0
ENSMUSG00000086921	0	0	0	0	0	0	0
ENSMUSG00000086874	0	0	0	1	1	0	0
ENSMUSG00000086018	0	0	0	0	3	0	1
ENSMUSG00000039449	2121	2147	2613	2321	1607	2411	1715
ENSMUSG00000048186	398	277	485	366	509	515	273
ENSMUSG00000026662	6417	6088	7957	7463	4482	6510	5084
ENSMUSG00000026664	1550	1424	1524	1290	1221	1300	1084
ENSMUSG00000026668	22	18	28	30	0	36	57
ENSMUSG00000026669	2059	2207	2577	2721	1375	3262	2465
ENSMUSG00000026672	654	764	727	706	426	923	889
ENSMUSG00000086430	0	1	2	0	3	2	0
ENSMUSG00000097770	0	0	0	0	0	0	0
ENSMUSG00000026676	120	96	141	97	87	114	121
ENSMUSG00000039145	250	266	295	255	97	361	348
ENSMUSG00000039128	3689	3869	4459	4230	2790	3912	3024
ENSMUSG00000025817	2037	2314	2463	2300	1569	2553	1975
ENSMUSG00000056718	36	23	23	16	46	36	16
ENSMUSG00000025816	1647	1777	2027	1921	1660	1780	1249
ENSMUSG00000085818	1	0	2	0	2	2	1
ENSMUSG00000025815	848	791	933	800	701	775	637
ENSMUSG00000043241	3933	3853	4146	4024	3342	4754	3429
ENSMUSG00000045319	1061	974	1198	1055	676	931	660
ENSMUSG00000102887	1	5	3	4	0	3	0
ENSMUSG00000039063	356	398	346	313	264	289	215
ENSMUSG00000087125	3	8	10	15	5	1	3
ENSMUSG00000087485	0	0	1	3	0	0	0
ENSMUSG00000039046	2190	1898	2416	2234	1663	2258	1591
ENSMUSG00000085716	1	0	0	4	3	0	0
ENSMUSG00000086109	0	3	2	1	5	0	1
ENSMUSG00000002107	2578	1762	2471	1964	1866	1842	1449
ENSMUSG00000087079	0	1	2	0	0	0	0
ENSMUSG00000097774	0	0	0	0	0	0	0
ENSMUSG00000099424	0	0	0	0	0	0	0
ENSMUSG00000085070	0	0	0	0	0	0	0
ENSMUSG00000085580	0	0	0	0	0	0	0
ENSMUSG00000079604	0	0	0	0	0	0	0
ENSMUSG00000079603	0	0	0	0	0	0	0
ENSMUSG00000015619	96	98	153	99	203	70	50
ENSMUSG00000086618	0	2	1	6	3	0	2
ENSMUSG00000025783	1	1	9	1	9	2	2
ENSMUSG00000079602	0	0	1	1	1	0	3
ENSMUSG00000075534	3	0	2	2	7	1	3
ENSMUSG00000025782	1348	1291	1675	1506	1055	1951	1504
ENSMUSG00000025781	10064	10445	11847	10645	6715	10647	8400
ENSMUSG00000037262	890	841	1003	945	659	999	701
ENSMUSG00000037254	132	115	163	146	78	55	50
ENSMUSG00000025780	4954	3553	4499	4004	3100	3051	2295
ENSMUSG00000061186	462	530	611	618	235	581	461
ENSMUSG00000085257	2	0	0	0	0	0	0
ENSMUSG00000026778	151	161	211	171	103	229	161
ENSMUSG00000102196	1	0	0	0	0	0	0
ENSMUSG00000102674	0	2	0	3	3	0	0
ENSMUSG00000086006	13	5	3	5	4	7	0
ENSMUSG00000086491	3	7	6	2	1	0	1
ENSMUSG00000026773	2249	1799	2086	1771	1005	1993	1546
ENSMUSG00000102329	0	2	2	1	0	0	2
ENSMUSG00000037197	5536	6038	6517	6367	4099	7672	6019
ENSMUSG00000091312	0	0	0	0	0	0	0
ENSMUSG00000026770	2	0	1	1	0	3	3
ENSMUSG00000023206	73	48	57	81	81	64	56
ENSMUSG00000058594	5930	5870	6987	6262	5317	6562	5102
ENSMUSG00000047909	1125	1058	1339	1043	1632	1228	822
ENSMUSG00000026768	4148	2618	4900	3208	3452	3344	2704
ENSMUSG00000086843	87	47	130	90	62	54	67
ENSMUSG00000026767	755	786	987	853	572	829	568
ENSMUSG00000104045	0	0	0	1	0	0	0
ENSMUSG00000026730	538	534	623	507	376	471	420
ENSMUSG00000049630	10	8	15	18	15	20	21
ENSMUSG00000026727	2911	2312	3176	2763	2274	2972	2399
ENSMUSG00000026726	161	79	174	111	62	105	66
ENSMUSG00000026723	356	430	536	489	211	342	313
ENSMUSG00000026728	54097	49951	63734	53729	53166	66018	46880
ENSMUSG00000003418	101	88	80	81	73	89	71
ENSMUSG00000104354	0	0	0	0	0	0	0
ENSMUSG00000063275	565	661	717	695	381	628	406
ENSMUSG00000026718	2388	2321	2583	2464	1670	2208	1848
ENSMUSG00000061531	1	4	12	1	2	4	4
ENSMUSG00000026712	632	246	702	422	515	510	305
ENSMUSG00000036949	1	0	2	2	0	6	1
ENSMUSG00000057914	566	489	546	461	474	480	354
ENSMUSG00000104106	0	0	0	0	3	1	0
ENSMUSG00000087086	0	0	0	0	0	0	0
ENSMUSG00000026707	498	491	514	477	357	405	344
ENSMUSG00000017418	4150	3569	4558	4220	2580	3228	2349
ENSMUSG00000075520	3	3	2	1	0	0	5
ENSMUSG00000026748	2905	2402	3212	2747	2522	2771	1887
ENSMUSG00000085193	0	0	0	0	0	0	0
ENSMUSG00000053702	34	17	42	29	69	59	36
ENSMUSG00000085100	0	0	0	0	0	0	0
ENSMUSG00000062651	1	0	0	0	0	0	0
ENSMUSG00000054057	749	713	921	672	604	696	549
ENSMUSG00000085319	1	3	1	0	6	1	4
ENSMUSG00000054074	833	755	935	900	518	718	591
ENSMUSG00000026743	2863	2859	3272	3204	2199	3359	2783
ENSMUSG00000026740	1783	1452	1876	1745	1701	1929	1428
ENSMUSG00000051154	2313	2743	2696	2333	1315	2106	1576
ENSMUSG00000026739	2710	2705	3028	2802	1474	2525	2036
ENSMUSG00000037708	7	1	10	2	5	7	2
ENSMUSG00000097638	0	0	1	1	1	0	0
ENSMUSG00000026737	1503	1378	1731	1512	1235	2201	1763
ENSMUSG00000026736	26	30	23	23	17	29	21
ENSMUSG00000037683	5	6	12	6	4	0	2
ENSMUSG00000087674	3	3	5	1	5	6	2
ENSMUSG00000023094	650	757	804	657	747	694	497
ENSMUSG00000109733	0	0	0	0	0	1	0
ENSMUSG00000087103	0	0	0	0	0	0	0
ENSMUSG00000085388	0	0	0	0	0	0	0
ENSMUSG00000026735	0	0	1	0	3	0	0
ENSMUSG00000026734	5	3	7	4	1	8	5
ENSMUSG00000086621	0	0	0	0	0	0	0
ENSMUSG00000043415	266	316	362	389	244	344	307
ENSMUSG00000087246	9	8	10	12	1	7	0
ENSMUSG00000036617	8964	6164	8514	7012	11333	10869	8030
ENSMUSG00000091457	6	0	7	0	5	1	4
ENSMUSG00000085477	0	0	0	0	2	0	1
ENSMUSG00000086418	0	0	0	0	6	1	0
ENSMUSG00000036591	4260	3598	4461	4449	3604	5601	3794
ENSMUSG00000075514	229	214	268	197	193	225	196
ENSMUSG00000087219	0	1	0	0	0	0	0
ENSMUSG00000026679	23	28	16	18	2	26	38
ENSMUSG00000048550	579	786	722	679	309	766	729
ENSMUSG00000085680	0	0	0	0	0	0	0
ENSMUSG00000045967	13	12	13	18	6	1	8
ENSMUSG00000025716	1	3	1	2	5	0	0
ENSMUSG00000026787	32	47	36	49	27	47	64
ENSMUSG00000085353	0	0	0	0	0	0	0
ENSMUSG00000026786	150	140	166	135	117	107	95
ENSMUSG00000026784	497	450	504	572	312	461	350
ENSMUSG00000058835	4600	4014	4952	4313	3210	4262	3562
ENSMUSG00000026781	1990	1698	2197	1936	1613	1887	1459
ENSMUSG00000026779	1310	1211	1419	1360	738	1274	891
ENSMUSG00000026775	9142	8439	9334	9166	5675	8426	7134
ENSMUSG00000026774	0	0	1	2	0	0	0
ENSMUSG00000069132	0	2	0	0	0	1	0
ENSMUSG00000026771	1290	1153	1330	1342	1054	1058	761
ENSMUSG00000026986	152	158	146	123	71	45	49
ENSMUSG00000061809	0	0	0	0	0	0	0
ENSMUSG00000026985	0	0	0	0	0	0	0
ENSMUSG00000044103	0	0	0	0	0	0	0
ENSMUSG00000026984	0	0	3	1	0	1	1
ENSMUSG00000026983	0	0	0	0	1	0	0
ENSMUSG00000046845	0	0	0	0	0	0	0
ENSMUSG00000085999	0	0	0	0	0	0	0
ENSMUSG00000026981	5	6	10	8	10	10	11
ENSMUSG00000026979	82	90	124	114	90	125	94
ENSMUSG00000026976	306	181	384	176	285	220	220
ENSMUSG00000085330	1	1	0	0	0	0	0
ENSMUSG00000004113	96	75	103	95	99	95	73
ENSMUSG00000036893	7016	6438	7975	7697	5693	8030	5579
ENSMUSG00000026972	439	366	492	365	413	452	327
ENSMUSG00000026974	3176	3569	4194	4714	1755	4566	3756
ENSMUSG00000026975	742	700	889	838	624	719	583
ENSMUSG00000036850	1418	1569	1487	1546	818	1293	971
ENSMUSG00000036833	1093	1303	1381	1236	653	1962	1907
ENSMUSG00000006476	2276	1938	2720	2055	2150	2058	1545
ENSMUSG00000036813	5	3	3	1	0	0	0
ENSMUSG00000036805	7	8	13	1	1	6	0
ENSMUSG00000087028	28	26	20	20	30	33	10
ENSMUSG00000078202	406	330	366	263	163	193	151
ENSMUSG00000103217	0	0	0	0	0	0	0
ENSMUSG00000059555	1297	1247	1525	1428	1434	1589	1057
ENSMUSG00000013465	4336	4314	5298	4594	3705	4767	3629
ENSMUSG00000036770	16	6	8	2	4	10	3
ENSMUSG00000026969	2	1	5	4	3	1	2
ENSMUSG00000036752	11307	11244	14936	14255	7687	15700	12790
ENSMUSG00000006469	5	1	2	2	0	10	5
ENSMUSG00000089953	5	15	8	7	3	11	9
ENSMUSG00000036731	1	0	3	2	1	4	9
ENSMUSG00000044628	392	358	384	338	235	338	316
ENSMUSG00000115018	0	0	0	0	0	0	0
ENSMUSG00000006471	377	334	452	416	342	541	465
ENSMUSG00000115074	0	0	0	0	0	0	0
ENSMUSG00000078201	294	282	364	351	264	313	197
ENSMUSG00000048707	498	571	690	673	344	954	792
ENSMUSG00000026966	1941	2228	2549	2455	1634	2388	1765
ENSMUSG00000026965	7711	7670	9727	8463	7106	9803	7387
ENSMUSG00000026963	0	0	0	0	0	0	0
ENSMUSG00000026961	0	0	0	1	0	0	0
ENSMUSG00000026959	43	23	23	18	19	7	27
ENSMUSG00000085830	1	1	2	3	0	4	1
ENSMUSG00000097345	39	29	52	54	28	39	31
ENSMUSG00000036646	6735	6344	8405	7008	6291	7544	5283
ENSMUSG00000026958	517	512	638	556	467	615	575
ENSMUSG00000026956	603	602	655	598	373	546	462
ENSMUSG00000026955	637	847	818	944	427	1018	788
ENSMUSG00000015085	89	93	137	95	44	110	109
ENSMUSG00000015094	671	531	785	531	714	682	499
ENSMUSG00000036587	0	0	1	0	0	0	4
ENSMUSG00000026944	2086	1670	2540	2294	2505	2836	1864
ENSMUSG00000047617	347	296	457	344	356	347	282
ENSMUSG00000015093	21	22	35	11	37	35	29
ENSMUSG00000015090	5184	3914	5668	4531	5126	6289	4984
ENSMUSG00000026943	0	2	2	2	0	3	0
ENSMUSG00000015083	144	141	209	127	132	129	134
ENSMUSG00000015095	2463	2209	3120	2578	2310	2445	2050
ENSMUSG00000026942	1292	1122	1572	1452	1221	1489	1125
ENSMUSG00000015092	3717	4069	4434	4279	2691	4652	3357
ENSMUSG00000026941	240	314	385	297	430	312	234
ENSMUSG00000036504	147	138	166	162	156	160	112
ENSMUSG00000029419	1	4	1	3	0	0	3
ENSMUSG00000097872	0	0	0	0	0	0	0
ENSMUSG00000015087	4854	4748	5570	5143	4599	5786	4147
ENSMUSG00000052403	11	17	15	11	26	16	9
ENSMUSG00000026940	20	24	31	22	13	20	11
ENSMUSG00000026939	450	366	480	414	311	275	193
ENSMUSG00000026938	7	8	18	10	16	6	9
ENSMUSG00000036449	1	1	2	5	5	0	4
ENSMUSG00000026937	1	0	0	0	0	0	0
ENSMUSG00000045684	0	0	0	0	0	0	0
ENSMUSG00000047356	0	0	0	0	0	0	0
ENSMUSG00000062061	22	13	22	16	12	22	14
ENSMUSG00000087612	42	30	43	37	24	31	31
ENSMUSG00000049086	1156	956	1215	968	1085	1383	977
ENSMUSG00000079539	0	0	0	0	1	0	0
ENSMUSG00000026936	37	23	51	11	24	38	9
ENSMUSG00000069080	8	8	2	9	2	5	1
ENSMUSG00000085484	10	6	10	13	11	12	17
ENSMUSG00000036401	2	0	1	0	1	1	2
ENSMUSG00000023210	0	1	0	0	0	1	1
ENSMUSG00000059625	25	12	6	15	13	11	13
ENSMUSG00000058740	1391	984	1392	1141	2457	1852	960
ENSMUSG00000026933	3816	3403	4357	4143	3537	5185	3859
ENSMUSG00000036352	2308	2656	2990	2746	1873	3030	2312
ENSMUSG00000026932	1345	1261	1443	1282	902	1161	829
ENSMUSG00000087515	0	0	0	0	0	0	0
ENSMUSG00000087679	1644	1621	2079	1790	1317	1889	1380
ENSMUSG00000087595	54	67	72	74	37	47	46
ENSMUSG00000085545	1	0	0	1	6	0	0
ENSMUSG00000026934	39	15	29	37	50	48	31
ENSMUSG00000098977	0	0	0	0	0	0	0
ENSMUSG00000036327	3782	2902	3996	3841	3451	4334	2779
ENSMUSG00000048038	191	169	161	206	135	92	66
ENSMUSG00000026930	2466	2123	3028	2787	2869	2815	1953
ENSMUSG00000075467	1613	1562	2409	2021	1472	1800	1257
ENSMUSG00000026928	53	57	73	57	88	76	64
ENSMUSG00000036281	1315	1308	1749	1590	1682	1903	1484
ENSMUSG00000085767	154	157	201	173	201	185	98
[truncated: 29,054 more rows]

## Sheet: ED_Fig9b
gene	baseMean	log2FoldChange	lfcSE	stat	pvalue	padj	mgi_symbol
ENSMUSG00000020160	1465.66	-7.50817	0.312514	-24.025	1.52266e-127	2.57603e-123	Meis1
ENSMUSG00000053093	392.916	-2.18189	0.129541	-16.8432	1.17678e-63	6.63625e-60	Myh7
ENSMUSG00000013936	118.25	-5.86014	0.375717	-15.5972	7.60284e-55	3.21562e-51	Myl2
ENSMUSG00000050397	166.011	2.88655	0.213877	13.4963	1.64354e-41	5.56107e-38	Foxl2
ENSMUSG00000027400	2498.12	1.56008	0.120883	12.9057	4.17863e-38	1.17823e-34	Pdyn
ENSMUSG00000038580	1370.81	1.4786	0.118094	12.5205	5.76606e-36	1.39357e-32	Sct
ENSMUSG00000067276	7333.84	1.04341	0.0934401	11.1666	5.94023e-29	1.25621e-25	Capn6
ENSMUSG00000059741	59.9109	-4.17385	0.38204	-10.9252	8.73807e-28	1.64256e-24	Myl3
ENSMUSG00000026414	292.011	-2.15737	0.215904	-9.99228	1.64754e-23	2.7873e-20	Tnnt2
ENSMUSG00000086784	2671.89	0.91684	0.0923599	9.92682	3.18247e-23	4.89463e-20	Isoc2a
ENSMUSG00000002100	2063.52	-1.12696	0.122419	-9.20574	3.39315e-20	4.78377e-17	Mybpc3
ENSMUSG00000068457	396.051	-3.48142	0.38257	-9.10008	9.02664e-20	1.17471e-16	Uty
ENSMUSG00000064358	424.762	2.98226	0.328114	9.08911	9.98488e-20	1.2066e-16	mt-Co3
ENSMUSG00000038583	36.8862	-3.41693	0.401955	-8.50079	1.8831e-17	2.12388e-14	Pln
ENSMUSG00000031937	445.172	1.18163	0.143808	8.21674	2.09111e-16	2.08102e-13	Vstm5
ENSMUSG00000024614	3403.26	0.501135	0.0636071	7.87861	3.31042e-15	3.11142e-12	Tmx3
ENSMUSG00000064360	50.5819	4.07543	0.520958	7.82296	5.15965e-15	4.59426e-12	mt-Nd3
ENSMUSG00000024529	3252.68	0.992903	0.127284	7.80068	6.15735e-15	5.2085e-12	Lox
ENSMUSG00000090122	3280.59	1.13858	0.148965	7.64332	2.11692e-14	1.70543e-11	Kcne1l
ENSMUSG00000050069	3303.39	-0.577082	0.076015	-7.59168	3.15774e-14	2.4283e-11	Grem2
ENSMUSG00000001657	1359.79	0.920368	0.121355	7.5841	3.34797e-14	2.46265e-11	Hoxc8
ENSMUSG00000064356	36.942	3.49723	0.483108	7.23903	4.51918e-13	3.18565e-10	mt-Atp8
ENSMUSG00000059857	293.955	-1.00193	0.13866	-7.22578	4.98225e-13	3.37159e-10	Ntng1
ENSMUSG00000039701	1449.14	0.607227	0.084629	7.17516	7.22206e-13	4.69934e-10	Usp53
ENSMUSG00000026384	1427.81	0.632998	0.0885439	7.14897	8.74306e-13	5.47834e-10	Ptpn4
ENSMUSG00000006262	1515.42	0.657656	0.0921214	7.13901	9.40028e-13	5.67979e-10	Mob1b
ENSMUSG00000060935	3273.21	0.480117	0.0675755	7.1049	1.20412e-12	6.79043e-10	Tmem263
ENSMUSG00000017144	5977.31	0.443067	0.0624809	7.09125	1.32908e-12	7.25337e-10	Rnd3
ENSMUSG00000096255	520.467	0.853582	0.120564	7.07988	1.44283e-12	7.62807e-10	Dynlt1b
ENSMUSG00000021904	2619.7	0.789385	0.111647	7.07035	1.54549e-12	7.9232e-10	Sema3g
ENSMUSG00000033186	2057.7	0.568205	0.0809048	7.02313	2.16958e-12	1.07956e-09	Mzt1
ENSMUSG00000026430	976.706	-0.740832	0.10666	-6.94576	3.7643e-12	1.81956e-09	Rassf5
ENSMUSG00000028989	346.35	1.24465	0.179874	6.91958	4.52995e-12	2.07129e-09	Angptl7
ENSMUSG00000074595	147.692	1.22867	0.177525	6.92114	4.4801e-12	2.07129e-09	Wfdc6a
ENSMUSG00000068696	310.28	1.4285	0.208928	6.83727	8.07169e-12	3.5936e-09	Gpr88
ENSMUSG00000055775	1316.71	1.11861	0.167675	6.67128	2.53579e-11	1.10001e-08	Myh8
ENSMUSG00000034892	13796.7	1.0937	0.16668	6.56165	5.32168e-11	2.2508e-08	Rps29
ENSMUSG00000027737	286.121	0.934187	0.142885	6.53805	6.23255e-11	2.57176e-08	Slc7a11
ENSMUSG00000059456	5988.99	-0.812648	0.124842	-6.50942	7.54419e-11	3.03887e-08	Ptk2b
ENSMUSG00000042429	2142.42	-0.518145	0.0798741	-6.48702	8.75496e-11	3.44457e-08	Adora1
ENSMUSG00000048040	2254.89	0.623723	0.0972919	6.41084	1.44717e-10	5.56435e-08	Arxes2
ENSMUSG00000057191	115.773	-2.16193	0.337989	-6.39645	1.59029e-10	5.97879e-08	AB124611
ENSMUSG00000042460	4581.67	0.677858	0.10635	6.37385	1.84347e-10	6.77995e-08	C1galt1
ENSMUSG00000060510	6373.87	0.367996	0.0578001	6.36671	1.93131e-10	6.95188e-08	Zfp266
ENSMUSG00000021215	5934.51	0.567004	0.0892962	6.34969	2.15747e-10	7.449e-08	Net1
ENSMUSG00000037573	1662.76	0.645786	0.10169	6.35056	2.14539e-10	7.449e-08	Tob1
ENSMUSG00000046785	4715.27	0.48956	0.0778422	6.28913	3.19246e-10	1.0802e-07	Epm2aip1
ENSMUSG00000001131	1786.03	0.702804	0.11246	6.24938	4.12073e-10	1.36695e-07	Timp1
ENSMUSG00000078974	1897.33	0.890151	0.142637	6.24065	4.35748e-10	1.41769e-07	Sec61g
ENSMUSG00000060377	112.389	1.9274	0.309544	6.22658	4.76716e-10	1.52171e-07	Rpl36a-ps1
ENSMUSG00000049295	3898.98	-0.383534	0.0619007	-6.19595	5.7935e-10	1.81508e-07	Zfp219
ENSMUSG00000028885	1099.32	0.885767	0.1432	6.18554	6.18888e-10	1.9037e-07	Smpdl3b
ENSMUSG00000063406	1549.91	0.431948	0.0698746	6.18176	6.339e-10	1.91506e-07	Tmed5
ENSMUSG00000036169	755.407	-1.42868	0.231393	-6.17425	6.64793e-10	1.97315e-07	Sostdc1
ENSMUSG00000098559	50.3372	3.73498	0.605684	6.16655	6.97947e-10	2.03584e-07	Gm15013
ENSMUSG00000064357	300.675	2.67062	0.435481	6.13258	8.64649e-10	2.47934e-07	mt-Atp6
ENSMUSG00000001229	2801.73	-0.402727	0.0657734	-6.12295	9.18605e-10	2.59016e-07	Dpp9
ENSMUSG00000028626	12592.9	-0.479875	0.0784358	-6.11806	9.47191e-10	2.62698e-07	Col9a2
ENSMUSG00000096606	185.903	1.25967	0.207605	6.0676	1.29833e-09	3.48652e-07	Tpbgl
ENSMUSG00000069919	25358.4	-1.01279	0.167548	-6.04477	1.49623e-09	3.92505e-07	Hba-a1
ENSMUSG00000070923	5636.28	0.386974	0.0640313	6.0435	1.50803e-09	3.92505e-07	Klhl9
ENSMUSG00000031785	8246.34	-0.465327	0.0771325	-6.03283	1.61116e-09	4.0683e-07	Adgrg1
ENSMUSG00000042423	4232.63	-0.362692	0.0601194	-6.03287	1.61076e-09	4.0683e-07	Fbrs
ENSMUSG00000090698	332.731	1.65999	0.275478	6.02586	1.68208e-09	4.18491e-07	Apold1
ENSMUSG00000025270	1982.27	-1.04304	0.173248	-6.02051	1.73863e-09	4.26292e-07	Alas2
ENSMUSG00000056880	140.951	1.24869	0.207549	6.01637	1.78372e-09	4.31099e-07	Gadl1
ENSMUSG00000046574	8519.45	-0.38153	0.0634441	-6.01365	1.81393e-09	4.32226e-07	Prr12
ENSMUSG00000020108	6750.59	0.643644	0.107357	5.99539	2.03004e-09	4.58513e-07	Ddit4
ENSMUSG00000053441	444.93	-1.00082	0.166876	-5.99742	2.00474e-09	4.58513e-07	Adamts19
ENSMUSG00000054871	397.896	1.15244	0.192227	5.99518	2.03265e-09	4.58513e-07	Tmem158
ENSMUSG00000070469	98.7974	-1.56643	0.261105	-5.99921	1.98275e-09	4.58513e-07	Adamtsl3
ENSMUSG00000021798	82.9283	-1.27922	0.213688	-5.98642	2.14508e-09	4.77506e-07	Ldb3
ENSMUSG00000027162	2968.49	0.477857	0.0802504	5.95458	2.60747e-09	5.72899e-07	Lin7c
ENSMUSG00000025355	279.06	0.955342	0.161198	5.92652	3.0942e-09	6.71123e-07	Mmp19
ENSMUSG00000032291	905.142	1.3562	0.230346	5.88767	3.91678e-09	8.28302e-07	Crabp1
ENSMUSG00000070394	1444.81	0.614211	0.104384	5.88412	4.00176e-09	8.35824e-07	Tmem256
ENSMUSG00000064354	242.908	2.14658	0.36532	5.87588	4.2061e-09	8.6779e-07	mt-Co2
ENSMUSG00000000031	32523.2	-7.15485	1.22073	-5.86114	4.59714e-09	9.37041e-07	H19
ENSMUSG00000031776	3240.97	0.431886	0.0738192	5.85059	4.89834e-09	9.86549e-07	Arl2bp
ENSMUSG00000020827	2989.59	-0.477737	0.0819904	-5.82674	5.65205e-09	1.12496e-06	Mink1
ENSMUSG00000025239	5613.4	0.59171	0.101605	5.82362	5.75859e-09	1.13283e-06	Limd1
ENSMUSG00000024747	5709.19	0.628479	0.108048	5.81665	6.00394e-09	1.16752e-06	Aldh1a7
ENSMUSG00000110631	2403.4	-0.729142	0.126624	-5.75834	8.49433e-09	1.63303e-06	Gm42047
ENSMUSG00000070529	127.427	1.11111	0.193177	5.75174	8.83287e-09	1.66381e-06	Wfdc10
ENSMUSG00000086266	810.192	0.915434	0.159268	5.74775	9.0439e-09	1.68137e-06	Igf2os
ENSMUSG00000067847	1858.23	0.728885	0.127179	5.73118	9.97347e-09	1.83403e-06	Romo1
ENSMUSG00000044424	92.8199	1.69659	0.296139	5.72903	1.01006e-08	1.83744e-06	Gm9493
ENSMUSG00000028778	209.301	-1.02107	0.179541	-5.68715	1.29178e-08	2.32493e-06	Hcrtr1
ENSMUSG00000037434	1343.74	0.556885	0.0986483	5.64516	1.65028e-08	2.93306e-06	Slc30a1
ENSMUSG00000093565	202.516	1.11613	0.197765	5.6437	1.66434e-08	2.93306e-06	Rab26os
ENSMUSG00000007613	8671.39	0.443965	0.0786942	5.64165	1.68427e-08	2.93758e-06	Tgfbr1
ENSMUSG00000019920	6846.13	0.383809	0.0684171	5.60985	2.02503e-08	3.49587e-06	Lims1
ENSMUSG00000042351	194.224	-1.10745	0.200064	-5.53546	3.1041e-08	5.30456e-06	Grap2
ENSMUSG00000041141	566.312	0.612259	0.110941	5.51879	3.41336e-08	5.74002e-06	Pnma8a
ENSMUSG00000045672	6585.48	-0.579772	0.105067	-5.5181	3.42678e-08	5.74002e-06	Col27a1
ENSMUSG00000027869	682.425	-1.02524	0.186019	-5.51148	3.55839e-08	5.90204e-06	Hsd3b6
ENSMUSG00000024423	2249.56	0.387595	0.0704834	5.4991	3.81732e-08	6.20975e-06	Impact
ENSMUSG00000029778	1617.44	-0.567908	0.103265	-5.49953	3.80809e-08	6.20975e-06	Adcyap1r1
ENSMUSG00000051319	385.954	0.683935	0.124634	5.48754	4.07575e-08	6.50506e-06	Mtln
ENSMUSG00000066798	897.301	0.569667	0.103804	5.48791	4.06717e-08	6.50506e-06	Zbtb6
ENSMUSG00000027828	16385.7	0.309763	0.0564777	5.4847	4.14173e-08	6.54858e-06	Ssr3
ENSMUSG00000025326	6550.04	0.487205	0.089264	5.45803	4.81451e-08	7.54184e-06	Ube3a
ENSMUSG00000014294	2535.46	0.677723	0.124336	5.45073	5.01629e-08	7.73203e-06	Ndufa2
ENSMUSG00000065952	251.1	1.52212	0.279271	5.45034	5.02733e-08	7.73203e-06	Rps23rg1
ENSMUSG00000052681	7596.78	0.320363	0.05899	5.4308	5.61009e-08	8.55058e-06	Rap1b
ENSMUSG00000017418	3441.42	0.374876	0.0690707	5.42743	5.71712e-08	8.55949e-06	Arl5b
ENSMUSG00000033006	1362.92	-0.678921	0.125078	-5.428	5.6989e-08	8.55949e-06	Sox10
ENSMUSG00000018846	6577.32	0.459823	0.0847594	5.42504	5.79413e-08	8.59869e-06	Pank3
ENSMUSG00000069769	4391.26	0.555912	0.102589	5.41882	5.99943e-08	8.82595e-06	Msi2
ENSMUSG00000056537	7980.88	0.57326	0.106344	5.39061	7.022e-08	1.02412e-05	Rlim
ENSMUSG00000027285	1348.93	0.425311	0.0789584	5.38651	7.18374e-08	1.03361e-05	Haus2
ENSMUSG00000110277	573.918	0.590303	0.109602	5.38588	7.20928e-08	1.03361e-05	Gm45871
ENSMUSG00000022843	2709.01	-0.596427	0.110907	-5.37773	7.54318e-08	1.0724e-05	Clcn2
ENSMUSG00000027314	884.338	0.854324	0.159479	5.35696	8.46317e-08	1.19317e-05	Dll4
ENSMUSG00000046949	1305.95	0.412531	0.0770864	5.35155	8.72046e-08	1.21928e-05	Nqo2
ENSMUSG00000031137	903.148	-0.592832	0.111006	-5.34057	9.26571e-08	1.2849e-05	Fgf13
ENSMUSG00000028488	520.458	-0.851715	0.159584	-5.33709	9.44487e-08	1.28862e-05	Sh3gl2
ENSMUSG00000090919	1102.03	0.553492	0.103687	5.33808	9.39351e-08	1.28862e-05	Pabpc4l
ENSMUSG00000027570	18972.6	-0.514786	0.0966629	-5.32558	1.00631e-07	1.35118e-05	Col9a3
ENSMUSG00000091803	293.017	0.810495	0.152182	5.32583	1.00493e-07	1.35118e-05	Cox16
ENSMUSG00000027861	804.91	-1.02077	0.191987	-5.31686	1.05571e-07	1.40634e-05	Casq2
ENSMUSG00000016763	4566.63	-0.852885	0.160583	-5.31117	1.08923e-07	1.43965e-05	Scube1
ENSMUSG00000068762	6251.65	-0.565193	0.106707	-5.29669	1.17921e-07	1.5465e-05	Gstm6
ENSMUSG00000031825	1422.25	-0.772613	0.146001	-5.29182	1.21106e-07	1.56402e-05	Crispld2
ENSMUSG00000048355	897.051	0.497951	0.094085	5.29257	1.20608e-07	1.56402e-05	Arxes1
ENSMUSG00000020877	1798.82	-0.443843	0.0839624	-5.2862	1.2488e-07	1.58851e-05	Scrn2
ENSMUSG00000041616	14.2228	-4.23889	0.801704	-5.28736	1.24097e-07	1.58851e-05	Nppa
ENSMUSG00000025666	1791.9	0.522819	0.0990577	5.27792	1.30655e-07	1.63735e-05	Tmem47
ENSMUSG00000033964	2482.85	0.504889	0.0956386	5.27914	1.29795e-07	1.63735e-05	Zbtb41
ENSMUSG00000031246	7639.75	0.485178	0.092129	5.26629	1.3921e-07	1.73173e-05	Sh3bgrl
ENSMUSG00000044734	1313.9	0.585068	0.111292	5.25707	1.46367e-07	1.80747e-05	Serpinb1a
ENSMUSG00000012422	4105.95	0.311849	0.0593433	5.255	1.48026e-07	1.81471e-05	Tmem167
ENSMUSG00000040752	315.434	-1.29059	0.24575	-5.25165	1.5074e-07	1.83469e-05	Myh6
ENSMUSG00000020585	16416.7	0.347313	0.0662724	5.24069	1.59976e-07	1.93319e-05	Laptm4a
ENSMUSG00000022358	579.973	-0.771366	0.147301	-5.23668	1.63493e-07	1.96169e-05	Fbxo32
ENSMUSG00000022676	2731.06	0.511955	0.0979911	5.22451	1.7462e-07	2.08044e-05	Snai2
ENSMUSG00000096768	2705.88	-0.740449	0.141827	-5.22078	1.78176e-07	2.10795e-05	Gm47283
ENSMUSG00000022185	15283.9	-0.444524	0.0852344	-5.21531	1.83509e-07	2.1411e-05	Acin1
ENSMUSG00000035840	1659.67	0.52474	0.100609	5.21566	1.8316e-07	2.1411e-05	Lysmd3
ENSMUSG00000025889	353.5	-1.01975	0.195655	-5.212	1.86818e-07	2.16478e-05	Snca
ENSMUSG00000051243	3356.78	-0.672867	0.1292	-5.20794	1.9095e-07	2.19762e-05	Islr2
ENSMUSG00000020802	4731.26	-0.457388	0.0879364	-5.20135	1.97848e-07	2.26162e-05	Ube2o
ENSMUSG00000064036	2542.39	-0.648981	0.124834	-5.19874	2.00647e-07	2.27822e-05	Mro
ENSMUSG00000036782	3762.77	0.362123	0.0697025	5.19527	2.04427e-07	2.30567e-05	Klhl13
ENSMUSG00000025316	1776.5	-0.595399	0.114716	-5.19019	2.10075e-07	2.35368e-05	Banp
ENSMUSG00000034551	298.743	0.774606	0.149625	5.17699	2.25498e-07	2.49345e-05	Hdx
ENSMUSG00000047996	642.146	0.678934	0.131115	5.17817	2.24071e-07	2.49345e-05	Prrg1
ENSMUSG00000041607	873.437	-0.422316	0.0819307	-5.15455	2.54234e-07	2.79294e-05	Mbp
ENSMUSG00000021969	3674.47	0.340342	0.0660974	5.14911	2.61731e-07	2.85676e-05	Zdhhc20
ENSMUSG00000024041	18.9161	6.39065	1.24213	5.14489	2.67675e-07	2.89681e-05	Cryaa
ENSMUSG00000068614	512.691	-3.57966	0.695878	-5.14409	2.68826e-07	2.89681e-05	Actc1
ENSMUSG00000078134	48.2401	2.1553	0.42051	5.12544	2.96838e-07	3.17843e-05	Srsf3-ps
ENSMUSG00000027298	9665.69	-0.434366	0.0849228	-5.11483	3.14018e-07	3.34123e-05	Tyro3
ENSMUSG00000071722	499.863	0.544297	0.106489	5.11129	3.19967e-07	3.38325e-05	Spin4
ENSMUSG00000016427	1043.77	0.580536	0.113622	5.10938	3.23226e-07	3.39648e-05	Ndufa1
ENSMUSG00000029211	983.088	0.670887	0.131387	5.10617	3.28756e-07	3.43326e-05	Gabra4
ENSMUSG00000029641	613.066	0.657809	0.128932	5.10198	3.36112e-07	3.44627e-05	Rasl11a
ENSMUSG00000045004	202.463	-0.900197	0.176413	-5.10278	3.34706e-07	3.44627e-05	Spata21
ENSMUSG00000048379	1497.32	0.499992	0.0979783	5.10309	3.34151e-07	3.44627e-05	Socs4
ENSMUSG00000008305	3815.11	-0.3613	0.0708691	-5.09814	3.43008e-07	3.49579e-05	Tle1
ENSMUSG00000020362	9098.9	0.367935	0.0723177	5.08775	3.62327e-07	3.63752e-05	Cnot6
ENSMUSG00000026163	737.613	0.906893	0.178308	5.08609	3.65515e-07	3.63752e-05	Sphkap
ENSMUSG00000053774	4420.55	0.311093	0.0611572	5.08678	3.64198e-07	3.63752e-05	Ubxn7
ENSMUSG00000079641	9052.29	0.761529	0.149674	5.08791	3.62035e-07	3.63752e-05	Rpl39
ENSMUSG00000059049	5172.73	-1.08149	0.213364	-5.06875	4.00447e-07	3.96185e-05	Frem1
ENSMUSG00000037326	1995.26	-0.437742	0.0863897	-5.06706	4.04001e-07	3.97378e-05	Capn15
ENSMUSG00000027351	6486.45	0.330913	0.065356	5.06323	4.12209e-07	4.03107e-05	Spred1
ENSMUSG00000058498	144.21	-1.83465	0.362706	-5.05823	4.23165e-07	4.11443e-05	Rnf207
ENSMUSG00000035165	140.211	2.68191	0.530341	5.05696	4.25996e-07	4.11828e-05	Kcne3
ENSMUSG00000047141	1615.54	0.465091	0.0920668	5.05167	4.37971e-07	4.21e-05	Zfp654
ENSMUSG00000032324	8443.86	0.317395	0.0629518	5.04188	4.60981e-07	4.40614e-05	Tspan3
ENSMUSG00000045767	7126.29	0.375327	0.074579	5.0326	4.83868e-07	4.59892e-05	B230219D22Rik
ENSMUSG00000042406	5784.83	0.296268	0.0589331	5.0272	4.97694e-07	4.70391e-05	Atf4
ENSMUSG00000075415	3521.43	-0.386175	0.0768603	-5.02438	5.05067e-07	4.74707e-05	Fnbp1
ENSMUSG00000006373	10836.9	0.418743	0.08347	5.01669	5.2569e-07	4.9136e-05	Pgrmc1
ENSMUSG00000039831	5588.18	0.406964	0.0814198	4.99834	5.78269e-07	5.37536e-05	Arhgap29
ENSMUSG00000038406	9730.09	-0.347359	0.0695186	-4.99663	5.834e-07	5.39342e-05	Scaf1
ENSMUSG00000096361	42.0895	1.8338	0.367653	4.98786	6.10527e-07	5.61353e-05	Gm5814
ENSMUSG00000024803	34.2116	-2.38716	0.479135	-4.98222	6.28577e-07	5.74825e-05	Ankrd1
ENSMUSG00000027739	1037.65	0.436214	0.0877138	4.97315	6.58745e-07	5.99175e-05	Rab33b
ENSMUSG00000026249	10680.6	-0.343733	0.0694276	-4.95096	7.38478e-07	6.68105e-05	Serpine2
ENSMUSG00000022528	2018.47	0.462583	0.0938009	4.93155	8.15814e-07	7.34145e-05	Hes1
ENSMUSG00000028788	13549.2	0.347798	0.0707105	4.91862	8.71581e-07	7.8018e-05	Ptp4a2
ENSMUSG00000024997	4433.8	0.375109	0.0763103	4.91557	8.85252e-07	7.88247e-05	Prdx3
ENSMUSG00000028795	839.972	0.471857	0.0960177	4.91427	8.91117e-07	7.89315e-05	Ccdc28b
ENSMUSG00000032122	758.256	0.698866	0.142372	4.90873	9.16675e-07	8.07724e-05	Slc37a2
ENSMUSG00000024308	1944.36	-0.408592	0.0833122	-4.90435	9.37382e-07	8.2169e-05	Tapbp
ENSMUSG00000060862	1372.35	-0.436738	0.0890883	-4.9023	9.47212e-07	8.26027e-05	Zbtb40
ENSMUSG00000046873	1759.88	0.395715	0.0807982	4.89757	9.70272e-07	8.37503e-05	Mbtps2
ENSMUSG00000062742	68.989	2.11363	0.431511	4.89821	9.67125e-07	8.37503e-05	Gm5239
ENSMUSG00000024063	21473.3	0.38237	0.0781256	4.8943	9.86565e-07	8.47244e-05	Lbh
ENSMUSG00000067377	3648.79	0.450785	0.0922933	4.88427	1.03813e-06	8.87023e-05	Tspan6
ENSMUSG00000025979	4037.31	0.40189	0.0823594	4.8797	1.06245e-06	9.0324e-05	Mob4
ENSMUSG00000027822	642.581	0.457524	0.0940029	4.86712	1.13234e-06	9.48365e-05	Slc33a1
ENSMUSG00000041515	1212.46	0.583104	0.1198	4.86731	1.13127e-06	9.48365e-05	Irf8
ENSMUSG00000051118	104.847	1.59579	0.327744	4.86901	1.12159e-06	9.48365e-05	Or7d10
ENSMUSG00000003541	199.888	1.09041	0.224192	4.86374	1.1519e-06	9.59991e-05	Ier3
ENSMUSG00000028266	2469.53	0.33868	0.0697819	4.85341	1.21356e-06	0.000100151	Lmo4
ENSMUSG00000046593	78.309	1.47224	0.303289	4.85426	1.20837e-06	0.000100151	Tmem215
ENSMUSG00000021806	8687.36	-0.557013	0.114856	-4.84968	1.23661e-06	0.000100582	Nid2
ENSMUSG00000040952	20284.9	0.327121	0.0674391	4.85061	1.23085e-06	0.000100582	Rps19
ENSMUSG00000110221	144.963	1.03554	0.213473	4.85094	1.22878e-06	0.000100582	Gm36210
ENSMUSG00000059534	2863.1	0.57272	0.118365	4.83857	1.30775e-06	0.000105859	Uqcr10
ENSMUSG00000027104	3480.12	0.315598	0.06535	4.82934	1.36985e-06	0.000110357	Atf2
ENSMUSG00000073371	59.4752	1.83222	0.379487	4.82815	1.37811e-06	0.000110497	Gm6594
ENSMUSG00000091449	91.6087	2.14607	0.444815	4.82464	1.40255e-06	0.000111926	Gm10269
ENSMUSG00000025574	2917.24	0.424205	0.0880387	4.81839	1.44719e-06	0.000114946	Tk1
ENSMUSG00000029022	1351.53	-0.481775	0.100095	-4.81317	1.48552e-06	0.00011744	Miip
ENSMUSG00000042066	1901.86	-0.613517	0.127899	-4.79688	1.61155e-06	0.000126811	Tmcc2
ENSMUSG00000033910	9347.75	-0.573011	0.119927	-4.77801	1.77035e-06	0.000138661	Gucy1a1
ENSMUSG00000005057	816.652	-0.56816	0.119104	-4.77029	1.83964e-06	0.000142766	Sh2b2
ENSMUSG00000032580	7742.2	-0.366327	0.0767836	-4.7709	1.83405e-06	0.000142766	Rbm5
ENSMUSG00000020766	4159.01	0.338167	0.0710682	4.75834	1.95189e-06	0.000150786	Galk1
ENSMUSG00000010406	1695.96	0.537669	0.113103	4.7538	1.9963e-06	0.000153032	Mrpl52
ENSMUSG00000050856	2117.58	0.800541	0.16841	4.75352	1.99906e-06	0.000153032	Atp5k
ENSMUSG00000060594	486.591	0.520194	0.109611	4.74583	2.07649e-06	0.000158243	Layn
ENSMUSG00000027962	2675.16	0.632253	0.133484	4.73653	2.17411e-06	0.00016494	Vcam1
ENSMUSG00000024647	61.9066	-1.49603	0.316454	-4.72747	2.27335e-06	0.000171699	Cbln2
ENSMUSG00000025409	3430.04	-0.543954	0.115116	-4.72526	2.29823e-06	0.000172806	Mbd6
ENSMUSG00000020463	4668.93	0.317582	0.0672612	4.72162	2.33971e-06	0.000173611	Ppp4r3b
ENSMUSG00000021754	4936.87	0.294494	0.0623649	4.7221	2.33419e-06	0.000173611	Map3k1
ENSMUSG00000027881	6270.44	-0.409738	0.0867541	-4.72298	2.32414e-06	0.000173611	Prpf38b
ENSMUSG00000101603	60.9243	1.38669	0.29378	4.72015	2.35668e-06	0.000174106	Gm28730
ENSMUSG00000042515	1884.06	0.467965	0.0994726	4.70446	2.54537e-06	0.000187229	Pwwp3b
ENSMUSG00000043753	208.755	0.712592	0.151563	4.70162	2.58104e-06	0.000189031	Dmrta1
ENSMUSG00000059970	925.719	-0.558079	0.118781	-4.69836	2.62253e-06	0.000191241	Hspa2
ENSMUSG00000028675	4139.17	0.424852	0.0905319	4.69285	2.69427e-06	0.00019563	Pnrc2
ENSMUSG00000037224	319.782	-0.678092	0.144741	-4.68486	2.80151e-06	0.000202547	Zfyve28
ENSMUSG00000031385	212.538	-0.711966	0.152079	-4.68157	2.84692e-06	0.000204954	Plxnb3
ENSMUSG00000012819	2169.28	-1.17569	0.251351	-4.6775	2.904e-06	0.000208177	Cdh23
ENSMUSG00000094248	35.0774	2.04016	0.436956	4.66902	3.02639e-06	0.000216036	H2ac23
ENSMUSG00000032637	8461.39	-0.327095	0.0701025	-4.66595	3.07192e-06	0.000217583	Atxn2l
ENSMUSG00000068617	118.6	1.28783	0.276014	4.66583	3.07379e-06	0.000217583	Efcab1
ENSMUSG00000040289	2069.67	0.724272	0.155305	4.66353	3.10832e-06	0.000219111	Hey1
ENSMUSG00000020423	1771.86	0.505889	0.108666	4.65544	3.23283e-06	0.000226942	Btg2
ENSMUSG00000031924	7154.9	0.40611	0.087351	4.64917	3.33267e-06	0.000232025	Cyb5b
ENSMUSG00000062380	238.437	-0.647256	0.139195	-4.64998	3.31971e-06	0.000232025	Tubb3
ENSMUSG00000038807	316.101	-0.63363	0.136505	-4.64181	3.45375e-06	0.000239469	Rap1gap2
ENSMUSG00000036054	2116.66	-0.35694	0.0771473	-4.62674	3.71465e-06	0.000256508	Sugp2
ENSMUSG00000022013	1456.94	0.533054	0.115477	4.6161	3.91023e-06	0.000265733	Dnajc15
ENSMUSG00000029372	39.3581	-2.9321	0.635197	-4.61605	3.91108e-06	0.000265733	Ppbp
ENSMUSG00000058135	17950.3	-0.419299	0.0908124	-4.6172	3.88951e-06	0.000265733	Gstm1
ENSMUSG00000059343	31.5583	2.1139	0.457819	4.61733	3.88714e-06	0.000265733	Aldoart1
ENSMUSG00000000320	179.519	-0.747577	0.162003	-4.61459	3.93878e-06	0.000266545	Alox12
ENSMUSG00000045382	760.302	0.713755	0.154747	4.6124	3.98038e-06	0.000268287	Cxcr4
ENSMUSG00000040734	1234.25	-0.376862	0.0817793	-4.60828	4.06012e-06	0.000272576	Ppp1r13l
ENSMUSG00000004864	3554.57	-0.440581	0.0956295	-4.60716	4.08199e-06	0.000272961	Mapk13
ENSMUSG00000026434	10057.8	0.44752	0.0971597	4.60602	4.10445e-06	0.000273383	Nucks1
ENSMUSG00000044217	1441.31	0.548245	0.119063	4.60464	4.13171e-06	0.000274119	Aqp5
ENSMUSG00000025040	1466.13	0.382253	0.083184	4.59527	4.3218e-06	0.000285611	Fundc1
ENSMUSG00000036596	894.368	0.479642	0.104435	4.59271	4.37521e-06	0.000288015	Cpz
ENSMUSG00000036751	5303.34	0.379016	0.0825943	4.58889	4.4562e-06	0.000292209	Cox6b1
ENSMUSG00000041096	2618.81	-0.4978	0.108508	-4.58769	4.48171e-06	0.000292748	Tspyl2
ENSMUSG00000035133	6437.39	0.344207	0.0750687	4.58523	4.53485e-06	0.000293949	Arhgap5
ENSMUSG00000086324	1366.92	3.889	0.848091	4.58559	4.52703e-06	0.000293949	Gm15564
ENSMUSG00000021917	2919.98	0.344674	0.0752045	4.58316	4.58002e-06	0.000295743	Spcs1
ENSMUSG00000058979	2090.38	-0.504447	0.110116	-4.58103	4.62683e-06	0.00029763	Hdhd5
ENSMUSG00000031517	508.504	0.669176	0.146145	4.57884	4.6756e-06	0.000298782	Gpm6a
ENSMUSG00000066324	6220	0.382384	0.0835147	4.57864	4.68006e-06	0.000298782	Bpnt2
ENSMUSG00000025240	2004.86	0.621867	0.135886	4.57638	4.731e-06	0.000299772	Sacm1l
ENSMUSG00000091955	166.842	0.915236	0.199978	4.57668	4.72416e-06	0.000299772	Tmsb10b
ENSMUSG00000061082	263.382	0.754239	0.16496	4.57226	4.82491e-06	0.000304581	Plac1
ENSMUSG00000031099	6939.45	0.338014	0.0739697	4.56962	4.88609e-06	0.000307297	Smarca1
ENSMUSG00000006276	3968.29	-0.332998	0.072896	-4.56812	4.92119e-06	0.000308358	Eps15l1
ENSMUSG00000051043	2992.27	0.522501	0.114435	4.56592	4.97311e-06	0.000310462	Gprc5c
ENSMUSG00000050029	3548.69	0.363817	0.0798146	4.55828	5.15738e-06	0.000320781	Rap2c
ENSMUSG00000033578	1516.96	0.59384	0.130427	4.55303	5.28788e-06	0.000327693	Tmem35a
ENSMUSG00000054408	4541	0.36894	0.0813026	4.53787	5.68264e-06	0.000350872	Spcs3
ENSMUSG00000005442	12783.3	-0.337287	0.0743765	-4.53486	5.76417e-06	0.000354612	Cic
ENSMUSG00000035673	1542.62	-0.347443	0.0767048	-4.5296	5.90945e-06	0.000362232	Sbno2
ENSMUSG00000002014	2274.94	0.365061	0.0806162	4.52839	5.94358e-06	0.000363009	Ssr4
ENSMUSG00000058396	1757.65	0.751832	0.166192	4.52387	6.07187e-06	0.00036951	Gpr182
ENSMUSG00000033610	3810.96	0.350245	0.0774487	4.52229	6.1174e-06	0.000370947	Pank1
ENSMUSG00000037110	1847.96	-0.4358	0.0963867	-4.52137	6.14408e-06	0.000371234	Ralgapa2
ENSMUSG00000033697	2109.62	-0.347885	0.0769899	-4.51858	6.22564e-06	0.000373494	Arhgap39
ENSMUSG00000085438	9412.59	0.394088	0.0872022	4.51924	6.20626e-06	0.000373494	Oip5os1
ENSMUSG00000026753	2131.02	0.349279	0.0773375	4.5163	6.29292e-06	0.000376196	Ppp6c
ENSMUSG00000040204	5103.98	0.522655	0.115864	4.51095	6.45371e-06	0.00038445	Pclaf
ENSMUSG00000055560	190.578	0.969406	0.21497	4.50948	6.49858e-06	0.000385765	Zfp459
ENSMUSG00000028527	714.996	1.1748	0.260591	4.50822	6.53739e-06	0.000386046	Ak4
ENSMUSG00000031877	151.735	1.05439	0.233902	4.50784	6.54895e-06	0.000386046	Ces2g
ENSMUSG00000006642	1375.84	0.401775	0.0892787	4.50024	6.78783e-06	0.000398738	Tcf23
ENSMUSG00000035615	515.258	-0.720632	0.160256	-4.49676	6.89973e-06	0.000403909	Frmpd1
ENSMUSG00000022686	1257.41	0.407049	0.0906119	4.49222	7.04834e-06	0.000411186	B3gnt5
ENSMUSG00000036699	724.645	0.614014	0.136762	4.48966	7.13354e-06	0.000414726	Zcchc12
ENSMUSG00000115289	40.38	1.85667	0.413678	4.4882	7.18279e-06	0.000416159	Gm49164
ENSMUSG00000028962	6104.3	-0.473631	0.105653	-4.48291	7.36331e-06	0.000425162	Slc4a2
ENSMUSG00000022371	10416.4	-0.502168	0.112103	-4.47954	7.48034e-06	0.000428991	Col14a1
ENSMUSG00000062070	9638.08	0.560548	0.125121	4.48006	7.46227e-06	0.000428991	Pgk1
ENSMUSG00000026342	2207.3	0.461851	0.103158	4.4771	7.56623e-06	0.000432451	Slc35f5
ENSMUSG00000037072	8214.98	0.378013	0.0845181	4.47257	7.72864e-06	0.000440246	Selenof
ENSMUSG00000020492	2243.06	0.351096	0.0785532	4.46953	7.83929e-06	0.000445051	Ska2
ENSMUSG00000037640	2167.4	0.309087	0.0692324	4.46449	8.026e-06	0.000454127	Zfp60
ENSMUSG00000002625	2056.59	-0.623767	0.139897	-4.45875	8.24409e-06	0.000464912	Akap8l
ENSMUSG00000004035	6745.26	-0.392004	0.0880351	-4.45281	8.47536e-06	0.000476366	Gstm7
ENSMUSG00000116358	43.0848	2.33794	0.525307	4.45061	8.56259e-06	0.000479675	Gm49450
ENSMUSG00000002496	5644.98	-0.272927	0.0613621	-4.44781	8.67514e-06	0.000484376	Tsc2
ENSMUSG00000020701	210.136	-0.794684	0.178724	-4.44644	8.7305e-06	0.000485435	Tmem132e
ENSMUSG00000022568	9625.36	-0.395302	0.0889274	-4.44522	8.78018e-06	0.000485435	Scrib
ENSMUSG00000032328	4675.37	0.316515	0.0711964	4.44566	8.76233e-06	0.000485435	Tmem30a
ENSMUSG00000001552	6182.16	-0.397693	0.0896399	-4.43656	9.14062e-06	0.000502677	Jup
ENSMUSG00000038370	2097.54	0.508157	0.114545	4.43631	9.15146e-06	0.000502677	Pcp4l1
ENSMUSG00000022390	19758.4	-0.261584	0.0589865	-4.43464	9.2227e-06	0.00050488	Zc3h7b
ENSMUSG00000090733	16967.4	0.553924	0.124927	4.43397	9.25126e-06	0.00050488	Rps27
ENSMUSG00000072582	1450.01	0.411018	0.0928726	4.42562	9.61676e-06	0.000523139	Ptrh2
ENSMUSG00000042742	1348.69	0.426908	0.0965937	4.41963	9.8872e-06	0.000536127	Bmt2
ENSMUSG00000060147	15522.3	0.453096	0.102541	4.41867	9.93109e-06	0.000536787	Serpinb6a
ENSMUSG00000058351	230.011	0.765503	0.173395	4.4148	1.01104e-05	0.000544737	Uqcc5
ENSMUSG00000074909	1026.9	0.453412	0.102813	4.41006	1.03342e-05	0.000555027	Ranbp6
ENSMUSG00000030054	13.8685	-3.66098	0.83074	-4.40689	1.04865e-05	0.000561427	Gp9
ENSMUSG00000025860	6194.5	0.304305	0.0690758	4.40538	1.05601e-05	0.000563583	Xiap
ENSMUSG00000003411	721.278	-0.475445	0.108077	-4.39912	1.08693e-05	0.000576621	Rab3b
ENSMUSG00000037685	1681.87	-0.497922	0.113188	-4.39905	1.08726e-05	0.000576621	Atp8a1
ENSMUSG00000000581	2021.75	0.464376	0.105589	4.39796	1.09273e-05	0.000577712	C1d
ENSMUSG00000045103	2420.47	0.389607	0.0886693	4.39393	1.11319e-05	0.000586698	Dmd
ENSMUSG00000028456	3894.52	-0.638606	0.145369	-4.393	1.11797e-05	0.000587387	Unc13b
ENSMUSG00000054863	519.664	-0.539117	0.122803	-4.39011	1.13295e-05	0.000593413	Tafa5
ENSMUSG00000038777	4622.81	-0.666438	0.152108	-4.38134	1.1795e-05	0.000613994	Sema6c
ENSMUSG00000028252	906.91	0.480196	0.109806	4.37313	1.22475e-05	0.000635593	Ccnc
ENSMUSG00000028849	8464.06	-0.278706	0.0638734	-4.36341	1.28052e-05	0.000660571	Map7d1
ENSMUSG00000078453	1445.01	0.393924	0.0902796	4.36338	1.28069e-05	0.000660571	Abracl
ENSMUSG00000039114	709.32	0.865558	0.198524	4.35998	1.30076e-05	0.000668883	Nrn1
ENSMUSG00000033319	3062.12	0.395716	0.0908512	4.35565	1.32671e-05	0.000680158	Fem1c
ENSMUSG00000114688	26.8671	2.29432	0.526828	4.35498	1.3308e-05	0.000680197	Gm47381
ENSMUSG00000038271	945.775	-0.562914	0.129302	-4.35349	1.3399e-05	0.000680731	Iffo1
ENSMUSG00000042745	2783.02	0.885006	0.203266	4.35393	1.33717e-05	0.000680731	Id1
ENSMUSG00000042604	78.3346	1.18307	0.27261	4.33981	1.42608e-05	0.000722349	Kcna4
ENSMUSG00000035569	14435.6	-0.328701	0.0757719	-4.33804	1.43761e-05	0.000726012	Ankrd11
ENSMUSG00000027805	3884.52	0.368097	0.084893	4.33602	1.45088e-05	0.000729374	Pfn2
ENSMUSG00000085007	132.728	0.911313	0.210188	4.33571	1.45288e-05	0.000729374	Smim43
ENSMUSG00000031565	6932.81	-0.352244	0.081416	-4.32647	1.51516e-05	0.000758388	Fgfr1
ENSMUSG00000036281	1573.41	-0.417493	0.0965747	-4.32301	1.53917e-05	0.00076813	Snapc4
ENSMUSG00000032220	1247.97	-0.338081	0.0782191	-4.32223	1.54463e-05	0.000768588	Myo1e
ENSMUSG00000039704	1901.78	0.324451	0.0751835	4.31546	1.59272e-05	0.000790197	Lmbrd2
ENSMUSG00000037225	1644.35	0.501743	0.116289	4.31463	1.59868e-05	0.000790832	Fgf2
ENSMUSG00000040721	746.483	-0.574512	0.133182	-4.31373	1.60525e-05	0.000791769	Zfhx2
ENSMUSG00000030470	16.9659	-3.49266	0.80981	-4.31294	1.61099e-05	0.000792287	Csrp3
ENSMUSG00000075470	5714.36	0.311851	0.0723531	4.31013	1.6316e-05	0.0008001	Alg10b
ENSMUSG00000062006	11213	0.393741	0.0914088	4.30747	1.65129e-05	0.000807415	Rpl34
ENSMUSG00000024121	682.815	0.454518	0.105618	4.30341	1.6819e-05	0.000812983	Atp6v0c
ENSMUSG00000028152	3654.34	0.383838	0.0891691	4.3046	1.67284e-05	0.000812983	Tspan5
ENSMUSG00000044707	1628.1	0.402994	0.0936427	4.30353	1.681e-05	0.000812983	Ccnjl
ENSMUSG00000063108	1908.38	0.32651	0.0758598	4.30413	1.67645e-05	0.000812983	Zfp26
ENSMUSG00000020810	2263.93	0.451398	0.104921	4.30228	1.69048e-05	0.000814801	Cygb
ENSMUSG00000039001	12232.7	0.542466	0.126132	4.30079	1.70187e-05	0.00081796	Rps21
ENSMUSG00000024186	1370.77	-0.916799	0.213654	-4.29103	1.77843e-05	0.000852337	Rgs11
ENSMUSG00000079435	12018	0.613206	0.143003	4.28806	1.80244e-05	0.000861402	Rpl36a
ENSMUSG00000024576	19228.4	0.278424	0.064991	4.28404	1.83532e-05	0.000872189	Csnk1a1
ENSMUSG00000079243	15.2586	-2.32245	0.542041	-4.28464	1.83038e-05	0.000872189	Xirp1
ENSMUSG00000038732	248.903	0.733352	0.171298	4.28116	1.85925e-05	0.000881085	Mboat1
ENSMUSG00000021094	1098.99	0.373232	0.0872286	4.27879	1.87916e-05	0.000888034	Dhrs7
ENSMUSG00000025245	1171.6	0.518305	0.121423	4.26859	1.9671e-05	0.000927003	Lztfl1
ENSMUSG00000114036	25.8324	1.78246	0.417637	4.26796	1.97268e-05	0.00092705	Gm48228
ENSMUSG00000030397	4608.93	-0.428348	0.100414	-4.2658	1.99183e-05	0.000933456	Mark4
ENSMUSG00000033411	3230.13	0.282156	0.0661737	4.26387	2.00914e-05	0.000938968	Ctdspl2
ENSMUSG00000079083	587.919	0.426215	0.100026	4.26105	2.03469e-05	0.000948288	Jrkl
ENSMUSG00000020143	235.614	-0.728402	0.170983	-4.26008	2.04355e-05	0.000949802	Dock2
ENSMUSG00000075700	5597.98	0.345634	0.0811794	4.25766	2.06575e-05	0.000957491	Selenot
ENSMUSG00000021474	2369.21	0.346806	0.081468	4.25696	2.07225e-05	0.000957876	Sfxn1
ENSMUSG00000037060	1236.67	0.488977	0.115361	4.23867	2.24848e-05	0.00103651	Cavin3
ENSMUSG00000010803	339.836	0.512493	0.12111	4.23162	2.3201e-05	0.00106661	Gabra1
ENSMUSG00000010154	700.846	-0.412008	0.097567	-4.22282	2.41264e-05	0.00108268	Spire2
ENSMUSG00000021338	2477.48	-0.374417	0.0886011	-4.22587	2.38015e-05	0.00108268	Carmil1
ENSMUSG00000032372	191.686	0.742603	0.175749	4.22536	2.38557e-05	0.00108268	Plscr2
ENSMUSG00000036356	494.846	0.600831	0.142153	4.22664	2.37207e-05	0.00108268	Csgalnact1
ENSMUSG00000038555	2240.58	-0.651943	0.154336	-4.22417	2.39826e-05	0.00108268	Reep2
ENSMUSG00000040370	936.124	0.450826	0.106735	4.22377	2.40254e-05	0.00108268	Etfrf1
ENSMUSG00000048482	222.819	0.819999	0.194161	4.22329	2.40761e-05	0.00108268	Bdnf
ENSMUSG00000057123	1535	0.74741	0.176903	4.22497	2.38978e-05	0.00108268	Gja5
ENSMUSG00000091831	37.8952	1.86998	0.442393	4.22697	2.36863e-05	0.00108268	Gm4707
ENSMUSG00000021379	791.531	0.859986	0.203813	4.21949	2.44857e-05	0.00109329	Id4
ENSMUSG00000024868	459.97	-1.59715	0.378523	-4.21943	2.44921e-05	0.00109329	Dkk1
ENSMUSG00000069379	17.5011	2.7197	0.645031	4.21639	2.48241e-05	0.00110519	Gm4950
ENSMUSG00000050587	116.817	1.14601	0.272606	4.20391	2.62349e-05	0.00116494	Lrrc4c
ENSMUSG00000027555	162.835	0.755949	0.180259	4.19368	2.74468e-05	0.00121556	Car13
ENSMUSG00000024176	1428.81	-0.339418	0.0809684	-4.19198	2.76527e-05	0.00122149	Sox8
ENSMUSG00000038290	4950.99	-0.255835	0.0610497	-4.1906	2.78216e-05	0.00122575	Smg6
ENSMUSG00000021895	1089.24	-0.376678	0.0902351	-4.1744	2.98768e-05	0.00131287	Arhgef3
ENSMUSG00000040423	2381.13	0.387407	0.0929054	4.1699	3.04728e-05	0.00133559	Rc3h1
ENSMUSG00000084897	1836.2	-0.587046	0.140898	-4.16647	3.0935e-05	0.00135235	Gm14226
ENSMUSG00000114665	178.868	-0.65759	0.157965	-4.16287	3.1427e-05	0.00137032	Lncbate6
ENSMUSG00000047417	5330.13	-0.32101	0.0771782	-4.15934	3.19172e-05	0.00138611	Rexo1
ENSMUSG00000063229	17801.1	0.638937	0.153625	4.15908	3.19532e-05	0.00138611	Ldha
ENSMUSG00000023845	3064.68	0.497119	0.119561	4.15787	3.21234e-05	0.00138993	Lnpep
ENSMUSG00000022010	53338.9	0.246343	0.0592862	4.15515	3.25068e-05	0.00140293	Tsc22d1
ENSMUSG00000071528	2662.04	0.64126	0.154381	4.15376	3.27062e-05	0.00140795	Atp5md
ENSMUSG00000000731	50.4932	1.51904	0.366121	4.14902	3.33904e-05	0.00142819	Aire
ENSMUSG00000025059	439.399	0.629276	0.15169	4.14843	3.34769e-05	0.00142819	Gk
ENSMUSG00000043969	3008.43	0.318803	0.0768404	4.1489	3.34079e-05	0.00142819	Emx2
ENSMUSG00000047259	141.344	0.885629	0.213499	4.14817	3.35142e-05	0.00142819	Mc4r
ENSMUSG00000025268	27132.2	0.341883	0.0825973	4.13916	3.48586e-05	0.00148175	Maged2
ENSMUSG00000029439	5152.3	-0.317429	0.0767148	-4.13778	3.50684e-05	0.00148694	Sfswap
ENSMUSG00000093904	5752.61	0.371119	0.0898455	4.13064	3.61754e-05	0.00153004	Tomm20
ENSMUSG00000054146	76.8446	1.49448	0.361989	4.12851	3.65124e-05	0.00154044	Krt15
ENSMUSG00000004951	1191.58	-0.340635	0.0826463	-4.1216	3.76249e-05	0.00157335	Hspb1
ENSMUSG00000020641	160.445	-1.20509	0.292322	-4.12246	3.74845e-05	0.00157335	Rsad2
ENSMUSG00000031865	11042.7	-0.249363	0.0604836	-4.12281	3.7427e-05	0.00157335	Dctn1
ENSMUSG00000078202	260.148	0.790217	0.191737	4.12136	3.76644e-05	0.00157335	Nrarp
ENSMUSG00000070858	562.842	0.559023	0.135956	4.11178	3.92623e-05	0.00163606	Gm1673
ENSMUSG00000036686	2125.63	-0.279944	0.0681469	-4.10795	3.99187e-05	0.00165526	Cc2d1a
ENSMUSG00000037989	380.127	-0.475653	0.115788	-4.10797	3.99147e-05	0.00165526	Wnk2
ENSMUSG00000027797	1463.2	0.682785	0.16645	4.10204	4.09527e-05	0.00169149	Dclk1
ENSMUSG00000042607	2345.99	-0.584048	0.142388	-4.10181	4.09926e-05	0.00169149	Asb4
ENSMUSG00000062619	496.617	0.445278	0.108594	4.10037	4.12482e-05	0.0016979	2310039H08Rik
ENSMUSG00000035674	1844.29	0.551834	0.1346	4.0998	4.13505e-05	0.00169798	Ndufa3
ENSMUSG00000025742	1341.41	0.344741	0.0841006	4.09915	4.14669e-05	0.00169864	Prps2
ENSMUSG00000009350	96.2291	-2.46531	0.601553	-4.09824	4.16296e-05	0.00170118	Mpo
ENSMUSG00000024969	3916.22	-0.290198	0.0709042	-4.09282	4.26153e-05	0.00173727	Mark2
ENSMUSG00000001247	1175.31	-0.48258	0.118035	-4.08845	4.3427e-05	0.00175965	Lsr
ENSMUSG00000004552	218.711	-0.930657	0.227652	-4.08806	4.34987e-05	0.00175965	Ctse
ENSMUSG00000021770	1885.61	0.371877	0.0909763	4.08763	4.35803e-05	0.00175965	Samd8
ENSMUSG00000022580	402.374	-0.639292	0.156342	-4.08907	4.3311e-05	0.00175965	Rhpn1
ENSMUSG00000050234	977.408	0.578604	0.141618	4.08568	4.39485e-05	0.00177029	Gja4
ENSMUSG00000051747	206.78	-1.91044	0.467993	-4.08221	4.46103e-05	0.00179268	Ttn
ENSMUSG00000015090	5088.52	-0.415201	0.101788	-4.07907	4.52157e-05	0.0018127	Ptgds
ENSMUSG00000030218	710.341	0.945792	0.231942	4.0777	4.54833e-05	0.00181483	Mgp
ENSMUSG00000042353	93.9929	-0.833527	0.204404	-4.07784	4.5456e-05	0.00181483	Frem3
ENSMUSG00000024393	39960.2	-0.314239	0.0770899	-4.07627	4.57633e-05	0.00181873	Prrc2a
ENSMUSG00000029189	3616.74	-0.544242	0.13352	-4.07611	4.57961e-05	0.00181873	Sel1l3
ENSMUSG00000042410	4753.07	0.263113	0.0646027	4.07279	4.64537e-05	0.001839	Agps
ENSMUSG00000061028	2724.46	-0.382368	0.0938918	-4.07244	4.65241e-05	0.001839	Clasrp
ENSMUSG00000042271	720.378	0.497591	0.122288	4.069	4.72158e-05	0.001862	Nxt2
ENSMUSG00000023993	18.1496	-3.16047	0.777065	-4.0672	4.75823e-05	0.00187005	Treml1
ENSMUSG00000061983	26272.5	0.459313	0.112939	4.06691	4.7641e-05	0.00187005	Rps12
ENSMUSG00000023000	3720.59	-0.422457	0.103929	-4.06488	4.80579e-05	0.00188205	Dhh
ENSMUSG00000026986	103.505	1.14949	0.283004	4.06174	4.87073e-05	0.00190307	Hnmt
ENSMUSG00000043496	6607.86	-0.837865	0.206408	-4.05927	4.92273e-05	0.00191896	Tril
ENSMUSG00000041354	3253.52	-0.379419	0.0934933	-4.05825	4.94427e-05	0.00192293	Rgl2
ENSMUSG00000000223	682.995	0.554681	0.136707	4.05744	4.96131e-05	0.00192442	Drp2
ENSMUSG00000005686	197.594	-0.841989	0.20754	-4.05699	4.97086e-05	0.00192442	Ampd3
ENSMUSG00000004891	7294.96	-0.46968	0.115789	-4.05634	4.98471e-05	0.00192537	Nes
ENSMUSG00000009092	448.47	-0.597246	0.147281	-4.05513	5.01055e-05	0.00192887	Derl3
ENSMUSG00000065947	24.2877	2.04095	0.503334	4.05485	5.01656e-05	0.00192887	mt-Nd4l
ENSMUSG00000020773	4884.16	-0.402475	0.0993274	-4.05201	5.07801e-05	0.00194807	Trim47
ENSMUSG00000115801	52.627	1.65183	0.407885	4.04973	5.12767e-05	0.00196267	Gm55330
ENSMUSG00000035277	6645.4	-0.39082	0.0966938	-4.04184	5.30345e-05	0.00202537	Arx
ENSMUSG00000036617	8759.78	-0.631948	0.156381	-4.04108	5.32063e-05	0.00202735	Etl4
ENSMUSG00000028248	4932.28	-0.458345	0.113464	-4.03958	5.35477e-05	0.00203577	Pnisr
ENSMUSG00000039103	296.469	-0.609784	0.151055	-4.03683	5.41777e-05	0.00205511	Nexn
ENSMUSG00000014177	1631.43	0.373226	0.0924968	4.03502	5.45982e-05	0.00206643	Tvp23b
ENSMUSG00000055200	698.875	0.505803	0.125378	4.03422	5.47841e-05	0.00206883	Sertad3
ENSMUSG00000021732	268.026	-0.748171	0.185484	-4.03361	5.49272e-05	0.00206962	Fgf10
ENSMUSG00000047496	296.894	0.627352	0.15571	4.02899	5.60181e-05	0.00210603	Rnf152
ENSMUSG00000033446	658.356	0.509399	0.126516	4.02636	5.66461e-05	0.00212492	Lpar6
ENSMUSG00000024049	164.698	-0.924575	0.229793	-4.02351	5.73366e-05	0.00214606	Myom1
ENSMUSG00000014313	5729.25	0.522975	0.130046	4.02147	5.78351e-05	0.00215994	Cox6c
ENSMUSG00000024219	2856.4	-0.300392	0.0747142	-4.02055	5.80617e-05	0.00216363	Anks1
ENSMUSG00000050212	3760.18	0.311445	0.0775391	4.01662	5.90381e-05	0.00219518	Eva1b
ENSMUSG00000073062	316.831	0.487225	0.121321	4.01601	5.91929e-05	0.00219611	Zxdb
ENSMUSG00000022174	3197.51	0.309398	0.0770661	4.01471	5.95183e-05	0.00220335	Dad1
ENSMUSG00000062300	6734.15	-0.374992	0.0934832	-4.01133	6.03765e-05	0.00223024	Nectin2
ENSMUSG00000047368	1075.19	0.387198	0.0966037	4.00811	6.1206e-05	0.00225596	Abhd17b
ENSMUSG00000022613	96.811	-1.00943	0.251956	-4.00638	6.16569e-05	0.00226763	Miox
ENSMUSG00000002997	9184.87	0.621075	0.155157	4.00288	6.25748e-05	0.00228752	Prkar2b
ENSMUSG00000016559	42491.8	0.266369	0.0665333	4.00354	6.24006e-05	0.00228752	H3f3b
ENSMUSG00000024421	543.551	-0.472339	0.118003	-4.00278	6.26034e-05	0.00228752	Lama3
ENSMUSG00000022000	4890.82	-0.354108	0.0885248	-4.0001	6.33166e-05	0.0023086	Zc3h13
ENSMUSG00000040687	866.735	-0.414002	0.103557	-3.99782	6.39285e-05	0.0023259	Madd
ENSMUSG00000034640	1398.73	0.491723	0.123087	3.99492	6.47172e-05	0.00234954	Tiparp
ENSMUSG00000047749	4310.08	0.399241	0.0999626	3.99391	6.49937e-05	0.00235452	Zc3hav1l
ENSMUSG00000010097	8430.21	-0.298659	0.0747988	-3.99282	6.52908e-05	0.00236023	Nxf1
ENSMUSG00000026360	2551.61	-0.280366	0.0702329	-3.99196	6.55306e-05	0.00236385	Rgs2
ENSMUSG00000025404	5961.73	-0.30403	0.0762294	-3.98836	6.65319e-05	0.00239487	R3hdm2
ENSMUSG00000027245	150.845	-0.975272	0.244704	-3.98552	6.73329e-05	0.00241343	Hypk
ENSMUSG00000045629	3812.71	-0.461606	0.115819	-3.9856	6.73109e-05	0.00241343	Sh3tc2
ENSMUSG00000024378	3743.81	0.64584	0.162097	3.98428	6.76861e-05	0.00242096	Stard4
ENSMUSG00000060743	10417.6	0.233426	0.0586489	3.98006	6.88982e-05	0.00245911	H3f3a
ENSMUSG00000019359	129.48	0.740695	0.186144	3.97914	6.9165e-05	0.00246344	Gdpd2
ENSMUSG00000022443	25820.7	-0.345731	0.0869407	-3.97663	6.98976e-05	0.0024843	Myh9
ENSMUSG00000002379	2147.21	0.388908	0.0978272	3.97546	7.02447e-05	0.00248619	Ndufa11
ENSMUSG00000038121	3567.64	0.258058	0.0649089	3.9757	7.01719e-05	0.00248619	Fam210a
ENSMUSG00000005873	4746.23	0.32829	0.0826693	3.97112	7.15365e-05	0.00251612	Reep5
ENSMUSG00000022634	1519.6	0.400943	0.100955	3.97152	7.14166e-05	0.00251612	Yaf2
ENSMUSG00000038412	1164.16	0.407687	0.102662	3.97118	7.15175e-05	0.00251612	Higd1a
ENSMUSG00000039910	3803.16	0.412716	0.103959	3.97	7.18738e-05	0.00252274	Cited2
ENSMUSG00000002227	7320.87	-0.306239	0.0772121	-3.9662	7.30284e-05	0.00255796	Mov10
ENSMUSG00000049690	711.216	0.722155	0.182148	3.96465	7.35028e-05	0.00256926	Nckap5
ENSMUSG00000049760	2099.36	0.493706	0.124658	3.96048	7.47984e-05	0.00260915	Micos13
ENSMUSG00000021559	4750.19	-0.492713	0.124644	-3.95295	7.71924e-05	0.00268712	Dapk1
ENSMUSG00000029840	10048.3	0.26116	0.0661021	3.95086	7.78715e-05	0.00270519	Mtpn
ENSMUSG00000026824	506.489	0.570744	0.144497	3.94988	7.81908e-05	0.00271072	Kcnj3
ENSMUSG00000054199	4640.32	-0.335228	0.084888	-3.94907	7.84564e-05	0.00271275	Gon4l
ENSMUSG00000027602	2176.25	0.310524	0.0786625	3.94755	7.89539e-05	0.00272045	Map1lc3a
ENSMUSG00000014813	2674.54	0.62089	0.157366	3.9455	7.9632e-05	0.00273824	Stc1
ENSMUSG00000006307	7137.79	-0.315736	0.0802095	-3.93639	8.27161e-05	0.00283852	Kmt2b
ENSMUSG00000022483	2652.14	-0.691274	0.176037	-3.92687	8.60585e-05	0.00294724	Col2a1
ENSMUSG00000004568	2661.29	-0.307476	0.0783331	-3.92524	8.66438e-05	0.00294938	Arhgef18
ENSMUSG00000040464	917.103	0.343682	0.087547	3.92568	8.64835e-05	0.00294938	Gtpbp10
ENSMUSG00000063882	4975.08	0.462591	0.117826	3.92605	8.63532e-05	0.00294938	Uqcrh
ENSMUSG00000041132	488.231	-0.679344	0.173136	-3.92376	8.71763e-05	0.00296155	N4bp2l1
ENSMUSG00000018659	1141.07	-0.436878	0.111391	-3.92202	8.78081e-05	0.00297456	Pnpo
ENSMUSG00000024759	5169.85	0.246471	0.0628472	3.92174	8.7911e-05	0.00297456	Atl3
ENSMUSG00000002812	5007.28	-0.317196	0.0809206	-3.91984	8.86079e-05	0.00299215	Flii
ENSMUSG00000031654	9483.36	-0.349057	0.0891749	-3.9143	9.06676e-05	0.00305561	Cbln1
ENSMUSG00000035969	1524.46	-0.419933	0.10736	-3.91146	9.17416e-05	0.00308565	Rusc2
ENSMUSG00000063129	10.3756	3.24123	0.828916	3.9102	9.22188e-05	0.00309555	Aldoart2
ENSMUSG00000072704	3383.94	0.272325	0.0697187	3.90605	9.38179e-05	0.00314299	Smim10l1
ENSMUSG00000025856	2557.84	-0.412786	0.105736	-3.90393	9.46433e-05	0.00316438	Pdgfa
ENSMUSG00000009633	466.077	0.635779	0.162878	3.90341	9.48462e-05	0.00316491	G0s2
ENSMUSG00000029714	4106.06	-0.313752	0.0804011	-3.90233	9.52704e-05	0.0031728	Gigyf1
ENSMUSG00000021712	1568.61	0.370243	0.0949719	3.89844	9.68127e-05	0.00320524	Trim23
ENSMUSG00000022240	104.238	-0.953911	0.244684	-3.89854	9.67763e-05	0.00320524	Ctnnd2
ENSMUSG00000062184	8051.69	0.316194	0.0810969	3.89897	9.66028e-05	0.00320524	Hs6st2
ENSMUSG00000075600	715.786	-0.392792	0.10077	-3.89791	9.70249e-05	0.00320599	Zc3h3
ENSMUSG00000024869	56.6641	-1.07161	0.275021	-3.89647	9.76033e-05	0.00321882	Gm49405
ENSMUSG00000027808	7239.85	0.278254	0.071425	3.89576	9.78928e-05	0.00322208	Serp1
ENSMUSG00000031389	327.302	-0.781263	0.200664	-3.8934	9.88496e-05	0.00324726	Arhgap4
ENSMUSG00000032536	3930.01	-0.322505	0.0828984	-3.89036	0.000100094	0.00328178	Trak1
ENSMUSG00000032212	4549.89	-0.320758	0.0825224	-3.88691	0.000101527	0.00332231	Sltm
ENSMUSG00000020601	8125.92	0.282679	0.0727369	3.88632	0.000101776	0.00332403	Trib2
ENSMUSG00000033122	1796.96	-0.457099	0.117661	-3.88488	0.000102382	0.00333736	Hsd17b3
ENSMUSG00000042167	2864.94	0.308939	0.0795594	3.88312	0.000103125	0.00335514	Tent2
ENSMUSG00000025950	11331.8	0.39177	0.100908	3.88243	0.000103416	0.00335814	Idh1
ENSMUSG00000032673	431.35	0.444606	0.114637	3.87838	0.000105154	0.00340802	Prorsd1
ENSMUSG00000018143	1595.38	-0.340339	0.0878445	-3.87433	0.000106918	0.00345198	Mafk
ENSMUSG00000044408	2444.93	0.404556	0.104416	3.87448	0.000106853	0.00345198	Sptssa
ENSMUSG00000034449	872.686	-0.547744	0.141572	-3.86901	0.000109278	0.00352147	Dhrs11
ENSMUSG00000029478	16081.4	-0.417585	0.108007	-3.86627	0.000110511	0.00355443	Ncor2
ENSMUSG00000043421	412.706	0.550684	0.142459	3.86555	0.00011084	0.00355824	Hilpda
ENSMUSG00000021223	1608.05	0.602114	0.155932	3.86139	0.000112742	0.00357185	Papln
ENSMUSG00000028479	1984.68	-0.350015	0.09064	-3.8616	0.000112648	0.00357185	Gne
ENSMUSG00000029462	1862.08	0.392085	0.101507	3.86265	0.000112165	0.00357185	Vps29
ENSMUSG00000031749	4791.1	-0.308367	0.0798524	-3.86171	0.000112597	0.00357185	St3gal2
ENSMUSG00000034708	5576.7	-0.317771	0.0822627	-3.86287	0.00011206	0.00357185	Grn
ENSMUSG00000042505	445.759	0.459877	0.119048	3.86294	0.00011203	0.00357185	Sdhaf3
ENSMUSG00000042985	3233.77	0.372102	0.096319	3.86323	0.000111899	0.00357185	Upk3b
ENSMUSG00000032598	1027.11	-0.40961	0.106098	-3.86066	0.000113081	0.0035759	Nckipsd
ENSMUSG00000008683	17290.6	0.489848	0.126917	3.85958	0.000113583	0.00357838	Rps15a
ENSMUSG00000028328	54.9713	-1.19561	0.309759	-3.8598	0.000113479	0.00357838	Tmod1
ENSMUSG00000035139	1235.1	-0.283006	0.0733777	-3.85684	0.00011486	0.00360521	Secisbp2
ENSMUSG00000090862	14640.4	0.370293	0.0960021	3.85713	0.000114725	0.00360521	Rps13
ENSMUSG00000001095	209.68	-0.769307	0.199571	-3.85481	0.000115818	0.00362299	Slc13a2
ENSMUSG00000040723	2601.91	-0.4482	0.116286	-3.85428	0.000116069	0.00362299	Rcsd1
ENSMUSG00000113471	56.956	1.90358	0.493866	3.85445	0.000115991	0.00362299	Gm48116
ENSMUSG00000032381	2611.69	0.308709	0.0801191	3.85312	0.000116621	0.00362755	Ciao2a
ENSMUSG00000048126	10364.1	-0.684124	0.177553	-3.85307	0.000116644	0.00362755	Col6a3
ENSMUSG00000046818	2533.31	0.343168	0.0891066	3.85121	0.000117535	0.00364856	Ddit4l
ENSMUSG00000031074	12.6456	-2.63978	0.685721	-3.84964	0.000118291	0.00366528	Fgf3
ENSMUSG00000038352	76.165	0.953878	0.247829	3.84894	0.00011863	0.00366907	Arl5c
ENSMUSG00000035545	4586.4	-0.500729	0.130184	-3.84631	0.00011991	0.00369862	Leng8
ENSMUSG00000039943	1913.12	0.478041	0.124293	3.84608	0.000120023	0.00369862	Plcb4
ENSMUSG00000026062	142.95	-0.797079	0.207289	-3.84526	0.000120426	0.00370432	Slc9a2
ENSMUSG00000022235	242.648	0.661235	0.172154	3.84095	0.00012256	0.0037631	Cmbl
ENSMUSG00000034724	3300.33	0.263837	0.0687071	3.84002	0.000123023	0.00377047	Cnot6l
ENSMUSG00000052534	11258.8	0.384916	0.100288	3.83812	0.000123981	0.00379297	Pbx1
ENSMUSG00000019689	418.276	0.584667	0.15266	3.82985	0.00012822	0.00391556	Fmc1
ENSMUSG00000027630	2179.07	0.394669	0.103096	3.82818	0.000129093	0.00393512	Tbl1xr1
ENSMUSG00000020948	799.786	0.453969	0.118891	3.81838	0.000134332	0.00408746	Klhl28
ENSMUSG00000036093	3895.36	0.341566	0.0894756	3.81743	0.000134852	0.00409543	Arl5a
ENSMUSG00000046404	414.55	0.614421	0.160969	3.81701	0.000135078	0.00409543	Yod1
ENSMUSG00000073131	1376.55	0.444461	0.116528	3.81419	0.000136631	0.00413509	Vma21
ENSMUSG00000039623	716.897	-0.38086	0.0999148	-3.81184	0.000137934	0.00416709	Ap5z1
ENSMUSG00000023020	1518.03	0.338919	0.0889257	3.81126	0.000138262	0.00416954	Cox14
ENSMUSG00000042129	462.331	-0.514527	0.135261	-3.80397	0.000142395	0.00428656	Rassf4
ENSMUSG00000037254	102.141	0.935322	0.246038	3.80153	0.000143805	0.00432131	Itih2
ENSMUSG00000029287	4980.17	0.604714	0.159121	3.80034	0.000144496	0.00433438	Tgfbr3
ENSMUSG00000005373	178.287	-0.87401	0.230305	-3.79501	0.000147635	0.00438309	Mlxipl
ENSMUSG00000023805	2111.21	-0.366631	0.0965787	-3.79619	0.000146938	0.00438309	Synj2
ENSMUSG00000036097	9120.76	0.309736	0.0815955	3.79599	0.000147055	0.00438309	Slf2
ENSMUSG00000039879	2322.69	0.273529	0.0720847	3.79455	0.00014791	0.00438309	Heca
ENSMUSG00000044548	2755.8	-0.577702	0.152244	-3.79457	0.0001479	0.00438309	Dact1
ENSMUSG00000047284	4837.98	-0.328513	0.0865758	-3.79451	0.000147934	0.00438309	Neurl4
ENSMUSG00000115420	42.3016	2.54505	0.67043	3.79615	0.000146959	0.00438309	Rmrp
ENSMUSG00000000148	1530.51	-0.314508	0.082994	-3.78953	0.000150934	0.00444975	Brat1
ENSMUSG00000063253	900.628	0.352997	0.0931523	3.78946	0.000150973	0.00444975	Scoc
ENSMUSG00000090622	302.281	0.575918	0.151945	3.7903	0.000150463	0.00444975	A930033H14Rik
ENSMUSG00000005469	6839.54	0.225425	0.0596279	3.78053	0.000156495	0.00458105	Prkaca
ENSMUSG00000019960	3826.47	0.434756	0.114974	3.78133	0.00015599	0.00458105	Dusp6
ENSMUSG00000037664	12139.9	0.508094	0.134398	3.78051	0.00015651	0.00458105	Cdkn1c
ENSMUSG00000079658	3034.56	0.509107	0.134657	3.78075	0.000156355	0.00458105	Eloc
ENSMUSG00000091742	29.6498	1.83954	0.487109	3.77645	0.000159079	0.00464817	Gm5093
ENSMUSG00000063952	10032.1	-0.406516	0.107696	-3.77468	0.000160213	0.00467325	Brpf3
ENSMUSG00000046096	1413.03	0.328181	0.0870357	3.77064	0.000162827	0.00473799	Mosmo
ENSMUSG00000049122	24.5839	-1.65163	0.438052	-3.77039	0.000162993	0.00473799	Frmd3
ENSMUSG00000025939	1422.22	0.313446	0.083174	3.76856	0.000164191	0.00476399	Ube2w
ENSMUSG00000113811	35.7644	1.73074	0.459305	3.76817	0.00016445	0.00476399	Gm47882
ENSMUSG00000004565	2518.35	-0.396829	0.105415	-3.76446	0.000166911	0.00481056	Pnpla6
ENSMUSG00000030393	1078.08	0.320614	0.0851631	3.7647	0.000166747	0.00481056	Zik1
ENSMUSG00000033350	3240.66	0.46754	0.124189	3.76473	0.000166727	0.00481056	Chst2
ENSMUSG00000018199	2645.18	0.368029	0.0978192	3.76234	0.00016833	0.00484322	Ro60
ENSMUSG00000068917	2980.24	-0.311292	0.0827492	-3.76187	0.000168644	0.00484402	Clk2
ENSMUSG00000039960	8274.49	0.296957	0.0789797	3.75991	0.000169976	0.00487398	Rhou
ENSMUSG00000020196	5072.07	-0.240705	0.0640437	-3.75844	0.000170975	0.00489433	Cabin1
ENSMUSG00000037469	76.8527	-1.06051	0.282277	-3.75698	0.000171976	0.00491468	Acp7
ENSMUSG00000047907	1492.5	-0.539287	0.143575	-3.75613	0.000172558	0.004923	Tshz2
ENSMUSG00000041133	10031.9	-0.296493	0.0789494	-3.75549	0.000173005	0.00492743	Smc1a
ENSMUSG00000019787	8.86467	-3.34783	0.891734	-3.75429	0.00017383	0.00494262	Trdn
ENSMUSG00000046215	173.428	0.738561	0.196908	3.75079	0.000176277	0.00500378	Rprml
ENSMUSG00000015733	6073.45	0.322228	0.085958	3.74867	0.000177774	0.00503683	Capza2
ENSMUSG00000021786	445.473	0.413342	0.110279	3.74815	0.00017814	0.00503683	Oxsm
ENSMUSG00000036943	2414.53	0.297882	0.07948	3.74788	0.000178334	0.00503683	Rab8b
ENSMUSG00000030523	11.2902	2.81881	0.752692	3.74497	0.000180416	0.00508712	Trpm1
ENSMUSG00000074575	56.5081	-0.96099	0.256716	-3.74339	0.000181551	0.00511061	Kcng1
ENSMUSG00000026933	4015.84	-0.316458	0.0845489	-3.7429	0.000181908	0.00511217	Camsap1
ENSMUSG00000030761	3680.55	-0.567803	0.151769	-3.74122	0.000183128	0.0051379	Myo7a
ENSMUSG00000050229	2046.11	0.347982	0.0931625	3.73522	0.000187553	0.00525334	Pigm
ENSMUSG00000027109	6779.35	0.29828	0.0799013	3.7331	0.000189136	0.00528021	Sp3
ENSMUSG00000049775	14305.8	0.324481	0.0869188	3.73315	0.000189097	0.00528021	Tmsb4x
ENSMUSG00000030615	695.733	0.395678	0.106089	3.72969	0.000191717	0.00534344	Tmem126a
ENSMUSG00000031955	6153.43	-0.32056	0.0860288	-3.72619	0.000194397	0.00540923	Bcar1
ENSMUSG00000029729	3199.05	0.32293	0.0867565	3.72226	0.000197449	0.00548199	Zkscan1
ENSMUSG00000042851	386.566	0.47388	0.127319	3.72199	0.00019766	0.00548199	Zc3h6
ENSMUSG00000018585	1373.97	0.326465	0.0877356	3.721	0.000198432	0.00549439	Atox1
ENSMUSG00000021234	219.616	-0.542937	0.146031	-3.71795	0.000200843	0.00555205	Fam161b
ENSMUSG00000021986	328.702	0.728528	0.196112	3.71485	0.000203325	0.0056115	Amer2
ENSMUSG00000049892	909.564	0.725359	0.195323	3.71364	0.000204297	0.00562214	Rasd1
ENSMUSG00000054889	5301.41	-0.602771	0.162317	-3.71355	0.000204375	0.00562214	Dsp
ENSMUSG00000095253	1714.5	0.283058	0.0762373	3.71285	0.000204937	0.00562845	Zfp799
ENSMUSG00000040520	1878.84	0.344497	0.0927963	3.7124	0.000205304	0.0056294	Manea
ENSMUSG00000033788	1783.52	-0.52921	0.142638	-3.71016	0.000207132	0.00565341	Dysf
ENSMUSG00000034258	557.886	-0.806707	0.217449	-3.70987	0.00020737	0.00565341	Flvcr2
ENSMUSG00000037166	1618.65	0.433672	0.116892	3.71004	0.000207228	0.00565341	Ppp1r14a
ENSMUSG00000046449	3145.66	0.534875	0.144194	3.70942	0.000207738	0.00565341	Nexmif
ENSMUSG00000059031	9.22267	3.0336	0.817842	3.70928	0.000207851	0.00565341	Or5p58
ENSMUSG00000021025	1527.26	0.372471	0.100453	3.70792	0.000208968	0.00567467	Nfkbia
ENSMUSG00000090946	1121.1	0.42592	0.114912	3.70647	0.000210168	0.00569811	Ccdc71l
ENSMUSG00000035847	1468.5	0.380176	0.10264	3.70399	0.000212232	0.00574487	Ids
ENSMUSG00000034820	5347.09	-0.219493	0.0593225	-3.7	0.000215602	0.00581746	Cpsf7
ENSMUSG00000042111	1280.74	0.381891	0.103213	3.70005	0.000215558	0.00581746	Ccdc115
ENSMUSG00000028952	834.75	-0.310955	0.0840615	-3.69913	0.000216339	0.00582807	Zbtb48
ENSMUSG00000019124	1389.79	-0.339237	0.0917256	-3.69838	0.000216977	0.00583595	Scrn1
ENSMUSG00000028364	2595.98	-0.900624	0.243628	-3.69672	0.000218403	0.00585568	Tnc
ENSMUSG00000054604	7778.03	0.335625	0.090785	3.69692	0.00021823	0.00585568	Cggbp1
ENSMUSG00000044716	790.307	-0.503103	0.136136	-3.69558	0.000219386	0.00587275	Dok7
ENSMUSG00000078190	658.432	0.719789	0.194934	3.69248	0.00022208	0.00593545	Dnm3os
ENSMUSG00000039834	1455.24	-0.320722	0.086969	-3.68778	0.000226223	0.00602716	Zfp335
ENSMUSG00000084786	2520.07	0.388117	0.105244	3.68778	0.00022622	0.00602716	Ubl5
ENSMUSG00000002279	1230.12	-0.298753	0.0810611	-3.68553	0.000228226	0.00606144	Lmf1
ENSMUSG00000029059	704.423	0.453537	0.12305	3.6858	0.000227987	0.00606144	Prxl2b
ENSMUSG00000014980	1290.13	0.369133	0.100315	3.67974	0.000233472	0.00618135	Tsen15
ENSMUSG00000001663	483.78	0.490242	0.133338	3.67668	0.000236291	0.00624105	Gstt1
ENSMUSG00000045205	2395.91	0.31876	0.0867022	3.67649	0.000236465	0.00624105	Dpy19l4
ENSMUSG00000045827	1063.67	0.292487	0.0795676	3.67595	0.000236962	0.00624444	Serpinb9
ENSMUSG00000020752	1375.92	-0.294711	0.0801919	-3.67507	0.000237782	0.0062563	Recql5
ENSMUSG00000063047	784.791	0.354917	0.096656	3.67196	0.000240697	0.00632315	Zfp780b
ENSMUSG00000022040	904.308	0.393166	0.107128	3.67005	0.000242502	0.0063607	Ephx2
ENSMUSG00000045973	4726.64	0.219639	0.0598831	3.66779	0.000244651	0.00640714	Slc25a51
ENSMUSG00000021567	1199.42	-0.557834	0.152176	-3.66573	0.000246638	0.00644703	Nkd2
ENSMUSG00000060961	517.426	0.517303	0.141131	3.66542	0.000246937	0.00644703	Slc4a4
ENSMUSG00000044433	1311.67	-0.716484	0.195584	-3.66331	0.000248982	0.00649041	Camsap3
ENSMUSG00000068876	2451.02	-0.34862	0.0951809	-3.66271	0.000249559	0.00649544	Cgn
ENSMUSG00000060090	1041.52	0.349732	0.095578	3.65913	0.000253078	0.00657691	Rp2
ENSMUSG00000036904	1256.5	0.360143	0.0984733	3.65727	0.00025492	0.00661463	Fzd8
ENSMUSG00000010290	1746.67	0.337447	0.0922891	3.65641	0.00025577	0.00662651	AI597479
ENSMUSG00000114117	144.365	0.665596	0.182072	3.65567	0.000256511	0.00663556	Gm48795
ENSMUSG00000058558	29094.9	0.464491	0.127077	3.65518	0.000256997	0.00663799	Rpl5
ENSMUSG00000038212	2995.15	0.286061	0.0782974	3.65351	0.000258676	0.00667116	Mfsd14b
ENSMUSG00000038393	3387.47	-0.514292	0.140789	-3.65293	0.000259263	0.00667613	Txnip
ENSMUSG00000073400	256.677	-0.876152	0.240011	-3.65047	0.000261763	0.00673025	Trim10
ENSMUSG00000067194	5613.11	0.395908	0.108501	3.6489	0.000263365	0.00676117	Eif1ax
ENSMUSG00000112831	1221.81	-0.290493	0.0796414	-3.64751	0.000264794	0.00678755	Gm35533
ENSMUSG00000020102	434.214	0.46299	0.126973	3.64636	0.000265986	0.00679794	Slc16a7
ENSMUSG00000087370	720.534	0.411117	0.112748	3.64634	0.000266003	0.00679794	Tmem170b
ENSMUSG00000032175	1617.52	-0.264827	0.0727685	-3.63931	0.000273368	0.00697563	Tyk2
ENSMUSG00000047215	28223	0.348553	0.0958494	3.63646	0.000276406	0.00704253	Rpl9
ENSMUSG00000031112	1615.04	0.555102	0.152712	3.63496	0.000278019	0.00707296	Stk26
ENSMUSG00000003955	2287.14	0.447563	0.123144	3.63446	0.000278565	0.00707622	Fam162a
ENSMUSG00000049036	263.238	0.552947	0.152199	3.63305	0.000280095	0.00710442	Tmem121
ENSMUSG00000004044	8600.31	0.292336	0.0804867	3.6321	0.000281125	0.00711987	Cavin1
ENSMUSG00000006589	2640.84	0.312663	0.0861199	3.63055	0.000282815	0.00715197	Aprt
ENSMUSG00000049878	3849.44	0.347541	0.0957429	3.62994	0.000283483	0.00715816	Rlf
ENSMUSG00000032726	86.1135	-1.03827	0.286368	-3.62566	0.000288222	0.00726697	Bmp8a
ENSMUSG00000024137	1442.34	-0.344794	0.095199	-3.62182	0.000292535	0.00736475	E4f1
ENSMUSG00000055493	206.42	0.510463	0.141	3.62029	0.000294269	0.00739739	Epm2a
ENSMUSG00000008575	9320.62	0.483626	0.133646	3.6187	0.000296092	0.00743217	Nfib
ENSMUSG00000060301	2608.68	0.300955	0.0833109	3.61243	0.000303341	0.00760284	2610008E11Rik
ENSMUSG00000022812	6948.64	0.299199	0.0828439	3.61159	0.00030432	0.00760485	Gsk3b
ENSMUSG00000030733	5214.09	-0.224369	0.062121	-3.61181	0.00030407	0.00760485	Sh2b1
ENSMUSG00000022674	764.132	0.500193	0.138608	3.60869	0.000307752	0.00766797	Ube2v2
ENSMUSG00000069184	340.821	0.506177	0.14026	3.60885	0.000307556	0.00766797	Zfp72
ENSMUSG00000031636	541.045	-1.00389	0.27828	-3.60746	0.000309212	0.00769301	Pdlim3
ENSMUSG00000006676	11540.2	-0.351353	0.0975043	-3.60346	0.000314006	0.00778937	Usp19
ENSMUSG00000058258	1364.35	0.831975	0.230873	3.60361	0.000313829	0.00778937	Idi1
ENSMUSG00000021877	11886.6	0.273731	0.076087	3.59761	0.00032116	0.00795518	Arf4
ENSMUSG00000020189	1485.6	0.341033	0.0948152	3.59682	0.00032213	0.0079559	Osbpl8
ENSMUSG00000042377	254.266	-0.504814	0.140349	-3.59685	0.000322095	0.0079559	Fam83g
ENSMUSG00000023809	4484.13	-0.410217	0.114122	-3.59454	0.000324962	0.00800644	Rps6ka2
ENSMUSG00000042050	1077.55	-0.36553	0.101694	-3.59441	0.000325123	0.00800644	Dync2i1
ENSMUSG00000022048	2159.45	0.392653	0.109342	3.59105	0.000329351	0.00808703	Dpysl2
ENSMUSG00000051403	4171.79	-0.272621	0.0759108	-3.59133	0.000328996	0.00808703	Ppp1r37
ENSMUSG00000076928	627.333	0.49875	0.138992	3.58833	0.0003328	0.00815987	Trac
ENSMUSG00000030351	2216.79	0.5128	0.142929	3.58779	0.000333494	0.00816505	Tspan11
ENSMUSG00000031253	797.529	0.637291	0.177947	3.58136	0.000341812	0.00835662	Srpx2
ENSMUSG00000042625	4981.99	-0.368391	0.102929	-3.57909	0.000344788	0.0084172	Safb2
ENSMUSG00000048720	736.021	0.330638	0.0924143	3.57778	0.000346527	0.00844746	Tbc1d12
ENSMUSG00000081044	3574.95	-0.430727	0.12057	-3.57243	0.000353688	0.00860963	AU015836
ENSMUSG00000020913	114.51	0.827873	0.231854	3.57067	0.000356068	0.0086551	Krt24
ENSMUSG00000033434	711.812	-0.354543	0.0993057	-3.57022	0.000356684	0.00865765	Gtpbp6
ENSMUSG00000049538	8475.76	-0.529482	0.14849	-3.56577	0.000362789	0.0087681	Adamts16
ENSMUSG00000071068	86.2755	-0.832901	0.233582	-3.56578	0.000362774	0.0087681	Treml2
ENSMUSG00000086429	328.346	0.563129	0.157915	3.56603	0.000362435	0.0087681	Gt(ROSA)26Sor
ENSMUSG00000022715	427.715	-0.809005	0.226957	-3.56457	0.000364459	0.00878337	Tmem114
ENSMUSG00000072568	1012.22	0.350957	0.0984507	3.5648	0.000364133	0.00878337	Lratd2
ENSMUSG00000019230	8748.19	0.461468	0.129566	3.56163	0.000368558	0.00886951	Lhx9
ENSMUSG00000087687	480.215	0.668765	0.188084	3.55567	0.000377014	0.00906013	Pet100
ENSMUSG00000045349	66.7057	-0.811264	0.228257	-3.55416	0.000379184	0.00909934	Sh2d5
ENSMUSG00000045160	741.802	0.406352	0.114394	3.55221	0.000382014	0.00915426	Bola3
ENSMUSG00000004947	1622.3	-0.274701	0.0773637	-3.55077	0.0003841	0.0091653	Dtx2
ENSMUSG00000021189	882.258	0.335953	0.094611	3.55088	0.00038394	0.0091653	Atxn3
ENSMUSG00000044465	2062.89	-0.310345	0.0873972	-3.55097	0.00038381	0.0091653	Fhip1b
ENSMUSG00000020019	527.636	-0.573314	0.161519	-3.54953	0.000385926	0.00918486	Ntn4
ENSMUSG00000024300	86.6265	-0.987298	0.278153	-3.54947	0.000386005	0.00918486	Myo1f
ENSMUSG00000041890	3155.16	-0.2525	0.0711787	-3.5474	0.000389048	0.00924426	Git2
ENSMUSG00000047213	6148.88	0.233573	0.0658625	3.54637	0.000390579	0.00926763	Ythdf3
ENSMUSG00000037364	11144.3	-0.415673	0.117238	-3.54554	0.000391807	0.00928374	Srrt
ENSMUSG00000042363	2141.8	0.410721	0.115924	3.543	0.000395602	0.00936056	Lgalsl
ENSMUSG00000045374	1457.96	-0.356924	0.100784	-3.54148	0.000397889	0.00940151	Wdr81
ENSMUSG00000026728	54918.7	-0.22516	0.063695	-3.53497	0.000407823	0.0096228	Vim
ENSMUSG00000024302	1696	-0.466805	0.132147	-3.53246	0.000411718	0.00970117	Dtna
ENSMUSG00000022332	2289.56	-0.253845	0.0719161	-3.52974	0.000415964	0.0097876	Khdrbs3
ENSMUSG00000033618	182.039	0.7307	0.207116	3.52797	0.000418757	0.00983964	Map3k13
ENSMUSG00000026385	3101.47	0.495601	0.14055	3.52617	0.00042162	0.00988653	Dbi
ENSMUSG00000045294	4351.39	0.632968	0.179516	3.52598	0.000421922	0.00988653	Insig1
ENSMUSG00000040321	1011.34	0.468176	0.132837	3.52443	0.000424401	0.0099077	Zfp770
ENSMUSG00000047205	467.333	0.443513	0.125844	3.52431	0.000424582	0.0099077	Dusp18
ENSMUSG00000048163	23.0936	-1.67449	0.475047	-3.52489	0.000423658	0.0099077	Selplg
ENSMUSG00000002699	46.2499	-1.13219	0.321336	-3.52338	0.000426074	0.00992881	Lcp2
ENSMUSG00000028060	3745.79	-0.227658	0.0646724	-3.52016	0.000431282	0.0100363	Khdc4
ENSMUSG00000049823	2723.25	0.259121	0.0736199	3.51971	0.000432012	0.0100395	Zbtb12
ENSMUSG00000038594	826.428	0.437347	0.12431	3.5182	0.000434489	0.0100724	Cep85l
ENSMUSG00000087322	9.74987	3.08914	0.878067	3.51812	0.000434617	0.0100724	Gm16075
ENSMUSG00000048307	3593.2	0.217264	0.061794	3.51594	0.000438202	0.0101416	Ankrd46
ENSMUSG00000057863	13973.8	0.483733	0.137598	3.51554	0.000438856	0.0101428	Rpl36
ENSMUSG00000023055	5021.06	-0.311057	0.088585	-3.5114	0.000445756	0.0102883	Calcoco1
ENSMUSG00000047248	3118.3	-0.257597	0.0734648	-3.5064	0.000454208	0.0104691	C2cd3
ENSMUSG00000029389	931.961	-0.346645	0.0988953	-3.50517	0.000456319	0.0105034	Ddx55
ENSMUSG00000041390	1720.27	0.368403	0.105127	3.50438	0.000457677	0.0105204	Mdfic
ENSMUSG00000028024	4206.06	-0.423842	0.121153	-3.4984	0.000468061	0.0107444	Enpep
ENSMUSG00000031504	481.773	-0.489352	0.139929	-3.49716	0.000470241	0.0107775	Rab20
ENSMUSG00000044894	2854.7	0.462165	0.132179	3.4965	0.000471413	0.0107775	Uqcrq
ENSMUSG00000075591	37.8305	1.32882	0.380036	3.49657	0.000471282	0.0107775	Gm10874
ENSMUSG00000045288	196.181	0.75857	0.217042	3.49503	0.000474005	0.0108222	Ush1g
ENSMUSG00000048583	13896.7	0.833759	0.238644	3.49374	0.000476309	0.0108601	Igf2
ENSMUSG00000030214	163.464	-0.706209	0.202173	-3.49309	0.000477462	0.0108717	Plbd1
ENSMUSG00000042737	766.64	0.469291	0.134395	3.49189	0.000479609	0.0109059	Dpm3
ENSMUSG00000009470	13626.3	0.331815	0.0951209	3.48835	0.000486013	0.0110367	Tnpo1
ENSMUSG00000016933	10709.1	-0.275735	0.079067	-3.48736	0.000487822	0.0110601	Plcg1
ENSMUSG00000036594	155.642	-0.759978	0.217964	-3.48671	0.000489005	0.0110601	H2-Aa
ENSMUSG00000043162	961.141	0.314969	0.0903331	3.48675	0.000488932	0.0110601	Pyurf
ENSMUSG00000025037	2241.23	0.293473	0.0842034	3.48528	0.000491615	0.0111043	Maoa
ENSMUSG00000036275	12187.6	0.258127	0.0740998	3.48351	0.000494888	0.011111	9530068E07Rik
ENSMUSG00000043929	703.242	0.44884	0.128818	3.48431	0.000493414	0.011111	Klhl15
ENSMUSG00000052419	1074.17	0.431206	0.123791	3.48334	0.000495196	0.011111	Smim30
ENSMUSG00000055653	44604.1	0.200981	0.057686	3.48406	0.000493874	0.011111	Gpc3
ENSMUSG00000058571	1882.6	-0.752948	0.21612	-3.48393	0.000494111	0.011111	Gpc6
ENSMUSG00000020107	2056.92	0.342259	0.0982698	3.48285	0.000496101	0.0111166	Anapc16
ENSMUSG00000023019	91.7321	0.93174	0.26791	3.47781	0.000505523	0.0112885	Gpd1
ENSMUSG00000027122	2273.96	0.228499	0.0657042	3.4777	0.000505739	0.0112885	Arl14ep
ENSMUSG00000036636	1969.08	-0.302793	0.0870675	-3.47768	0.000505775	0.0112885	Clcn7
ENSMUSG00000032018	1607.93	0.708172	0.203693	3.47667	0.000507685	0.0113162	Sc5d
ENSMUSG00000029484	1588.08	0.476733	0.137232	3.47393	0.000512895	0.0114109	Anxa3
ENSMUSG00000051674	1572.93	0.264632	0.076181	3.47373	0.00051328	0.0114109	Dcun1d4
ENSMUSG00000043881	1723.91	0.313788	0.0903778	3.47196	0.000516666	0.0114711	Kbtbd7
ENSMUSG00000027955	5255.85	0.283138	0.0815851	3.47046	0.000519576	0.0115206	Gask1b
ENSMUSG00000035407	3457.24	-0.329006	0.0948141	-3.47001	0.000520444	0.0115247	Kank4
ENSMUSG00000031400	3333.63	-0.253253	0.0729999	-3.46922	0.000521967	0.0115283	G6pdx
ENSMUSG00000031862	3889.34	-0.289349	0.0834025	-3.46931	0.000521802	0.0115283	Atp13a1
ENSMUSG00000066306	15901.1	-0.207753	0.0598936	-3.4687	0.000522987	0.0115357	Numa1
ENSMUSG00000062078	15902.9	0.290881	0.0838915	3.46735	0.000525621	0.0115787	Qki
ENSMUSG00000040459	5873.79	-0.297948	0.0860077	-3.4642	0.000531814	0.0116999	Arglu1
ENSMUSG00000031198	2127.88	0.333713	0.0963489	3.46359	0.000533025	0.0117013	Fundc2
ENSMUSG00000040648	3854.03	0.27874	0.0804799	3.46347	0.000533259	0.0117013	Ppip5k2
ENSMUSG00000046330	18490.1	0.454858	0.131435	3.46072	0.000538743	0.0118063	Rpl37a
ENSMUSG00000056019	740.975	0.332069	0.0959695	3.46015	0.000539874	0.0118092	Zfp709
ENSMUSG00000060509	11.3238	2.24321	0.648335	3.45995	0.000540272	0.0118092	Xcr1
ENSMUSG00000004567	1195.2	-0.303064	0.0876732	-3.45675	0.000546737	0.0119209	Mcoln1
ENSMUSG00000027615	1389.61	-0.310179	0.0897366	-3.45655	0.000547133	0.0119209	Hps3
ENSMUSG00000031628	2967.34	0.313126	0.0905939	3.45637	0.000547498	0.0119209	Casp3
ENSMUSG00000028454	1269.53	-0.323301	0.0936003	-3.45406	0.000552207	0.012008	Pigo
ENSMUSG00000105471	11.9869	2.38772	0.691398	3.45347	0.000553424	0.012019	A430073D23Rik
ENSMUSG00000002778	5435.4	0.267655	0.0775193	3.45276	0.000554891	0.0120354	Kdelr1
ENSMUSG00000025289	4297.77	0.242367	0.0702498	3.45008	0.00056042	0.0121398	Prdx4
ENSMUSG00000024072	1336.43	0.329223	0.0954937	3.44759	0.000565618	0.0122211	Yipf4
ENSMUSG00000026109	160.373	-1.02234	0.296537	-3.4476	0.00056559	0.0122211	Tmeff2
ENSMUSG00000025161	3476.35	0.721283	0.209275	3.44658	0.000567737	0.0122512	Slc16a3
ENSMUSG00000009030	2450.79	0.225159	0.0654223	3.44162	0.000578234	0.0124144	Pdcl
ENSMUSG00000042842	1942.43	0.346797	0.100747	3.44225	0.000576889	0.0124144	Serpinb6b
ENSMUSG00000043190	577.293	0.380984	0.110695	3.44174	0.00057798	0.0124144	Rfesd
ENSMUSG00000079019	2098.13	0.757526	0.220059	3.44238	0.000576623	0.0124144	Insl3
ENSMUSG00000015143	7797.7	-0.364142	0.105851	-3.44013	0.000581435	0.0124673	Actn1
ENSMUSG00000024335	16621.1	-0.242187	0.0704757	-3.43646	0.00058938	0.0126217	Brd2
ENSMUSG00000093739	16.0438	-1.71344	0.498962	-3.43401	0.000594716	0.0127198	Gm20692
ENSMUSG00000032845	58.2194	-0.924189	0.269304	-3.43177	0.000599666	0.0128095	Alpk2
ENSMUSG00000063838	1476.86	0.262173	0.0764495	3.42936	0.000604996	0.0129071	Cdc42ep5
ENSMUSG00000024773	2473.17	-0.301871	0.0880884	-3.42691	0.000610488	0.0129724	Atg2a
ENSMUSG00000038195	49.1692	-1.11413	0.325138	-3.42663	0.000611125	0.0129724	Rilp
ENSMUSG00000058443	53.0822	-1.11962	0.326718	-3.42687	0.000610576	0.0129724	Rpl10-ps3
ENSMUSG00000084957	683.091	0.353523	0.103155	3.42709	0.000610088	0.0129724	Bbip1
ENSMUSG00000033220	136.116	-0.750381	0.219063	-3.42542	0.000613857	0.0129978	Rac2
ENSMUSG00000073616	1423.03	0.505645	0.147606	3.42564	0.000613351	0.0129978	Cops9
ENSMUSG00000104955	296.706	0.529534	0.15475	3.42188	0.000621905	0.0131517	1700016F12Rik
ENSMUSG00000001065	1196.58	-0.424987	0.124223	-3.42115	0.000623569	0.0131705	Zfp276
ENSMUSG00000045319	916.443	0.282965	0.082733	3.42022	0.000625715	0.0131993	Proser2
ENSMUSG00000061759	1744.81	0.356579	0.10427	3.41977	0.000626751	0.0132047	Armt1
ENSMUSG00000062382	326.116	0.584245	0.17098	3.41704	0.000633071	0.0133213	Ftl1-ps1
ENSMUSG00000040462	4530.31	-0.358046	0.104799	-3.41649	0.000634344	0.0133315	Os9
ENSMUSG00000033597	2235.43	-0.560084	0.163991	-3.41534	0.000637035	0.0133714	Caskin1
ENSMUSG00000028367	6358.03	0.380427	0.111427	3.41414	0.000639826	0.0133967	Txn1
ENSMUSG00000042605	4472.01	-0.272109	0.079695	-3.41438	0.000639263	0.0133967	Atxn2
ENSMUSG00000028906	7240.05	-0.282807	0.0828592	-3.4131	0.000642275	0.0134314	Epb41
ENSMUSG00000042451	31.8579	-2.62994	0.771029	-3.41095	0.00064738	0.0135215	Mybph
ENSMUSG00000025465	6239.64	0.414405	0.12163	3.4071	0.000656569	0.0136965	Echs1
ENSMUSG00000039713	2120.76	-0.343306	0.100774	-3.40668	0.000657593	0.0137009	Plekhg5
ENSMUSG00000032757	1380.65	0.266604	0.0783162	3.4042	0.000663571	0.0138085	Bet1
ENSMUSG00000037210	4742.37	-0.31907	0.0937847	-3.40215	0.000668575	0.0138955	Fam193a
ENSMUSG00000023939	1173.61	0.368499	0.10836	3.40069	0.000672155	0.0139528	Mrpl14
ENSMUSG00000004677	5995.29	-0.268236	0.0789036	-3.39954	0.000674991	0.0139774	Myo9b
ENSMUSG00000040701	460.516	-0.615806	0.181131	-3.39977	0.000674416	0.0139774	Ap1g2
ENSMUSG00000021262	7089.07	-0.242369	0.0714238	-3.39339	0.000690326	0.0142358	Evl
ENSMUSG00000030826	4321.86	-0.317682	0.0936234	-3.39319	0.000690836	0.0142358	Bcat2
ENSMUSG00000047638	103.087	0.755388	0.222609	3.39334	0.000690462	0.0142358	Nr1h4
ENSMUSG00000106951	110.258	0.674166	0.198647	3.39379	0.000689314	0.0142358	5930430L01Rik
ENSMUSG00000022438	2219.32	0.407952	0.120245	3.39266	0.000692182	0.0142462	Parvb
ENSMUSG00000028943	3689.27	-0.582943	0.171874	-3.39168	0.000694656	0.0142507	Espn
ENSMUSG00000039474	772.95	-0.359863	0.106104	-3.39162	0.000694809	0.0142507	Wfs1
ENSMUSG00000074194	222.825	0.543485	0.160246	3.39157	0.000694928	0.0142507	Zfp791
ENSMUSG00000028776	7408.59	-0.434884	0.128298	-3.38965	0.000699819	0.0143046	Tinagl1
ENSMUSG00000028998	2207.43	0.70129	0.206859	3.39019	0.000698443	0.0143046	Tomm7
ENSMUSG00000036057	4986.06	-0.297386	0.0877364	-3.38954	0.000700093	0.0143046	Ptpn23
ENSMUSG00000023046	246.948	0.615839	0.181804	3.38739	0.000705621	0.0143138	Igfbp6
ENSMUSG00000024669	13.2091	2.26151	0.667568	3.38769	0.00070485	0.0143138	Cd5
ENSMUSG00000025016	12955.2	0.184709	0.0545048	3.38886	0.000701846	0.0143138	Tm9sf3
ENSMUSG00000037152	1398.07	0.555329	0.163917	3.38787	0.00070437	0.0143138	Ndufc1
ENSMUSG00000044933	88.4188	-0.890401	0.262814	-3.38795	0.000704183	0.0143138	Sstr3
ENSMUSG00000075590	2759.26	-0.742146	0.219031	-3.38831	0.000703259	0.0143138	Nrbp2
ENSMUSG00000070348	3298.75	0.376374	0.111211	3.38433	0.000713513	0.0144565	Ccnd1
ENSMUSG00000019978	16055.8	-0.20049	0.0592524	-3.38366	0.000715263	0.0144747	Epb41l2
ENSMUSG00000024560	4189.63	-0.258462	0.076501	-3.37854	0.000728715	0.0147293	Cxxc1
ENSMUSG00000020723	1163.72	-0.454659	0.134586	-3.3782	0.000729623	0.01473	Cacng4
ENSMUSG00000034621	4237.06	-0.278456	0.0824608	-3.37682	0.000733277	0.0147862	Gpatch8
ENSMUSG00000033066	9234	-0.398759	0.118111	-3.37613	0.000735131	0.0148059	Gas7
ENSMUSG00000056536	2053.38	0.265436	0.078649	3.37494	0.000738308	0.0148522	Pign
ENSMUSG00000042213	280.903	0.439153	0.130135	3.3746	0.000739238	0.0148532	Zfand4
ENSMUSG00000015970	411.184	0.525289	0.155692	3.37389	0.000741142	0.0148736	Chdh
ENSMUSG00000021057	807.756	0.366301	0.10858	3.37357	0.000742007	0.0148736	Akap5
ENSMUSG00000020163	2285.06	0.544851	0.161646	3.37064	0.000749949	0.015015	Uqcr11
ENSMUSG00000030766	2646.17	-0.239454	0.0710689	-3.36932	0.000753545	0.0150691	Arhgap17
ENSMUSG00000023089	1399.84	0.542072	0.16095	3.36795	0.000757305	0.0151086	Ndufa5
ENSMUSG00000039115	18894.5	-0.384424	0.11414	-3.368	0.000757153	0.0151086	Itga9
ENSMUSG00000098188	1061.15	0.305148	0.0906469	3.36634	0.000761741	0.0151792	Sowahc
ENSMUSG00000075486	1260.6	0.237671	0.070612	3.36588	0.000763009	0.0151866	Commd6
ENSMUSG00000003810	7681.19	-0.264808	0.0787181	-3.364	0.000768215	0.0152549	Mast2
ENSMUSG00000023039	1412.19	0.38124	0.113341	3.36367	0.000769146	0.0152549	Krt7
ENSMUSG00000031832	911.126	-0.34881	0.103696	-3.36377	0.000768867	0.0152549	Taf1c
ENSMUSG00000009207	881.03	0.310838	0.0925169	3.35979	0.000780006	0.0154522	Lnpk
ENSMUSG00000030172	3148.94	-0.295307	0.0879286	-3.35848	0.00078371	0.0155074	Erc1
ENSMUSG00000071180	1827.13	0.352817	0.105182	3.35434	0.000795543	0.0157231	Smim15
ENSMUSG00000060913	99.0327	-0.951451	0.283711	-3.35359	0.0007977	0.0157474	Trim55
ENSMUSG00000005054	1206.13	0.407665	0.121578	3.35312	0.000799047	0.0157556	Cstb
ENSMUSG00000068745	194.217	-0.611379	0.182474	-3.3505	0.000806667	0.0158873	Mybphl
ENSMUSG00000055866	650.436	0.476109	0.142121	3.35002	0.000808046	0.015896	Per2
ENSMUSG00000038803	1902.59	0.323636	0.0966541	3.3484	0.000812809	0.0159711	Ost4
ENSMUSG00000038838	1977.66	-0.259629	0.0775467	-3.34804	0.000813861	0.0159732	Vars2
ENSMUSG00000041229	4509.56	-0.286705	0.0856543	-3.34724	0.000816216	0.0160009	Phf8
ENSMUSG00000064137	675.978	-0.45018	0.13469	-3.34234	0.000830754	0.016267	Rhox8
ENSMUSG00000038264	3962.24	-0.580535	0.173717	-3.34184	0.000832258	0.0162776	Sema7a
ENSMUSG00000037432	280.336	-0.432627	0.129507	-3.34056	0.000836111	0.0163341	Fer1l5
ENSMUSG00000025500	148.598	-0.711544	0.213083	-3.33929	0.000839936	0.0163899	Lmntd2
ENSMUSG00000041571	6098.92	0.317194	0.0950057	3.33868	0.000841779	0.0164069	Selenow
ENSMUSG00000051147	129.777	0.659569	0.197594	3.33801	0.000843821	0.0164278	Nat2
ENSMUSG00000059486	2768.93	0.264924	0.0793829	3.33729	0.000845994	0.0164512	Kbtbd2
ENSMUSG00000020328	2465.21	0.341622	0.102376	3.33693	0.000847079	0.0164534	Nudcd2
ENSMUSG00000020137	878.815	0.287667	0.0862343	3.33588	0.00085031	0.0164972	Thap2
ENSMUSG00000032097	15528.2	0.223355	0.0670069	3.33331	0.000858202	0.0166062	Ddx6
ENSMUSG00000032288	1715.96	0.323999	0.0971983	3.33338	0.000857985	0.0166062	Imp3
ENSMUSG00000115354	366.686	0.595572	0.178685	3.33309	0.000858875	0.0166062	Gm49083
ENSMUSG00000030428	1071.18	-0.471026	0.141363	-3.33204	0.000862125	0.01665	Ttyh1
ENSMUSG00000036026	2194.48	-0.287082	0.0861695	-3.3316	0.000863494	0.0166575	Tmem63b
ENSMUSG00000023982	22.0581	1.53296	0.46025	3.33072	0.000866207	0.0166718	Guca1a
ENSMUSG00000031060	5366.45	-0.325026	0.0975807	-3.33085	0.000865824	0.0166718	Rbm10
ENSMUSG00000029071	2154.68	-0.316379	0.0950386	-3.32895	0.000871742	0.0167592	Dvl1
ENSMUSG00000026193	26255	-0.505016	0.151726	-3.32848	0.000873228	0.0167688	Fn1
ENSMUSG00000031310	9232.13	-0.396777	0.119261	-3.32698	0.000877923	0.0168398	Zmym3
ENSMUSG00000021288	4628.97	-0.216505	0.0650848	-3.32651	0.000879424	0.0168495	Klc1
ENSMUSG00000003849	543.394	0.452147	0.13602	3.32412	0.000886984	0.0169751	Nqo1
ENSMUSG00000024276	3039.84	0.272527	0.0820655	3.32085	0.000897446	0.0171559	Zfp397
ENSMUSG00000026782	3473.84	0.26385	0.0794774	3.31982	0.000900767	0.0172	Abi2
ENSMUSG00000040283	175.758	1.1371	0.342959	3.31557	0.000914555	0.017425	Btnl9
ENSMUSG00000102758	182.043	0.54667	0.16488	3.31555	0.000914614	0.017425	Naaladl2
ENSMUSG00000022556	2463.55	-0.325644	0.0982771	-3.31353	0.00092127	0.0175321	Hsf1
ENSMUSG00000095677	1080.15	-0.308652	0.0931764	-3.31255	0.000924484	0.0175735	Dynlt1f
ENSMUSG00000031604	4506.42	0.733668	0.221571	3.31121	0.000928922	0.017638	Msmo1
ENSMUSG00000052613	39.7238	-1.14245	0.345098	-3.31051	0.000931274	0.0176629	Pcdh15
ENSMUSG00000027954	1177.6	0.346264	0.104622	3.30967	0.000934064	0.017696	Efna1
ENSMUSG00000003435	10549.8	-0.342838	0.103614	-3.3088	0.00093698	0.0177314	Supt5
ENSMUSG00000026179	4073.2	-0.391672	0.118387	-3.30842	0.000938255	0.0177356	Pnkd
ENSMUSG00000050199	10592.1	0.393621	0.119107	3.30477	0.000950554	0.0179481	Lgr4
ENSMUSG00000067220	564.71	-0.378109	0.114478	-3.3029	0.00095691	0.0180479	Cnga1
ENSMUSG00000063663	2010.72	0.384375	0.116439	3.30107	0.000963158	0.0181455	Brwd3
ENSMUSG00000038816	2456.61	-0.245493	0.0743909	-3.30004	0.000966712	0.0181923	Ctnnal1
ENSMUSG00000089762	1876.71	0.312494	0.0947122	3.2994	0.000968906	0.0182133	Ier5l
ENSMUSG00000019718	513.439	0.465559	0.141263	3.29568	0.000981835	0.0184358	L3hypdh
ENSMUSG00000020374	114.161	-0.813501	0.246865	-3.29533	0.000983057	0.0184383	Rasgef1c
ENSMUSG00000035632	5866.27	-0.422314	0.128182	-3.29465	0.00098543	0.0184623	Cnot3
ENSMUSG00000027770	5050.57	0.238242	0.0723746	3.29179	0.000995502	0.0185893	Dhx36
ENSMUSG00000041935	3339.43	0.266316	0.0808947	3.29214	0.000994298	0.0185893	Rimoc1
ENSMUSG00000047281	304.19	-0.549837	0.167026	-3.29193	0.000995023	0.0185893	Sfn
ENSMUSG00000031608	1923.6	-0.230574	0.0701446	-3.28713	0.00101214	0.0188583	Galnt7
ENSMUSG00000033361	2955.66	0.355492	0.108141	3.2873	0.00101155	0.0188583	Prrg3
ENSMUSG00000061787	23090.3	0.383611	0.116719	3.28663	0.00101394	0.0188711	Rps17
ENSMUSG00000029570	1200.38	0.338007	0.102858	3.28615	0.00101567	0.0188826	Lfng
ENSMUSG00000021065	1948.44	0.254039	0.0773407	3.28468	0.00102099	0.0189606	Fut8
ENSMUSG00000022485	539.083	0.636649	0.193856	3.28414	0.00102295	0.0189726	Hoxc5
ENSMUSG00000038437	3656.45	-0.212386	0.0646754	-3.28388	0.00102388	0.0189726	Mllt6
ENSMUSG00000041841	13517.2	0.430914	0.13128	3.2824	0.00102928	0.0190102	Rpl37
ENSMUSG00000060843	282.083	-0.902343	0.274896	-3.28249	0.00102895	0.0190102	Ctnna3
ENSMUSG00000062929	3744.61	0.335871	0.102321	3.28253	0.00102879	0.0190102	Cfl2
ENSMUSG00000050552	977.063	0.363205	0.110674	3.28176	0.00103162	0.0190326	Lamtor4
ENSMUSG00000016477	2297.01	0.313863	0.0958675	3.27392	0.00106066	0.0195463	E2f3
ENSMUSG00000039016	1450.81	0.329169	0.100552	3.27363	0.00106177	0.0195463	Timm8b
ENSMUSG00000016534	12508.1	0.329801	0.100794	3.27202	0.00106783	0.0196104	Lamp2
ENSMUSG00000032786	10704.9	0.533976	0.163222	3.27147	0.00106989	0.0196104	Alas1
ENSMUSG00000062083	38.0668	1.65242	0.505062	3.27171	0.00106901	0.0196104	Rpl13a-ps1
ENSMUSG00000071856	1253.16	0.468205	0.143091	3.27209	0.00106755	0.0196104	Mcc
ENSMUSG00000018765	7384.16	-0.363418	0.111125	-3.27035	0.00107416	0.0196249	Fxr2
ENSMUSG00000031292	622.243	0.414218	0.126651	3.27054	0.00107341	0.0196249	Cdkl5
ENSMUSG00000046008	61.0302	1.46133	0.446767	3.27089	0.00107209	0.0196249	Pnlip
ENSMUSG00000019254	3485.14	-0.305566	0.0934462	-3.26996	0.00107562	0.0196303	Ppp1r12c
ENSMUSG00000093674	34029	0.449962	0.137666	3.2685	0.00108118	0.0197106	Rpl41
ENSMUSG00000021767	3794.73	-0.278065	0.0851123	-3.26703	0.0010868	0.0197701	Kat6b
ENSMUSG00000022664	640.834	0.446599	0.136712	3.2667	0.00108807	0.0197701	Slc35a5
ENSMUSG00000040564	396.1	0.700901	0.214577	3.26643	0.00108912	0.0197701	Apoc1
ENSMUSG00000043323	4882.95	-0.337523	0.103326	-3.26658	0.00108855	0.0197701	Fbrsl1
ENSMUSG00000011263	1580.83	-0.439333	0.134595	-3.26411	0.00109808	0.0199113	Exoc3l2
ENSMUSG00000032383	5132.9	0.240238	0.0736148	3.26345	0.00110066	0.0199313	Ppib
ENSMUSG00000047953	33.0111	-1.22471	0.375307	-3.26322	0.00110154	0.0199313	Gp5
ENSMUSG00000046318	1809.85	0.39329	0.120541	3.2627	0.00110356	0.0199466	Ccbe1
ENSMUSG00000014932	2443.12	0.296309	0.090837	3.26198	0.00110635	0.0199545	Yes1
ENSMUSG00000021457	1718.88	-0.337595	0.103489	-3.26215	0.00110572	0.0199545	Syk
ENSMUSG00000029821	396.731	0.37055	0.11362	3.26131	0.00110897	0.0199804	Gsdme
ENSMUSG00000020740	1912.15	-0.283022	0.0868071	-3.26036	0.00111272	0.0200267	Gga3
ENSMUSG00000001435	70403.4	-0.329702	0.101168	-3.25896	0.00111821	0.0200826	Col18a1
ENSMUSG00000109378	64.6642	-0.827624	0.253937	-3.25917	0.00111739	0.0200826	Gm49396
ENSMUSG00000021268	8984.86	-0.852789	0.26174	-3.25816	0.00112139	0.0200971	Meg3
ENSMUSG00000027293	2227.74	-0.304665	0.0935061	-3.25824	0.00112107	0.0200971	Ehd4
ENSMUSG00000074063	168.195	0.581341	0.178646	3.25414	0.00113735	0.0203615	Osgin1
ENSMUSG00000036537	157.381	0.538935	0.165944	3.2477	0.00116342	0.0208063	Rnf113a1
ENSMUSG00000036002	1168.5	-0.368731	0.113578	-3.24651	0.00116831	0.0208496	Atosb
ENSMUSG00000079941	57.0434	1.05012	0.323452	3.24661	0.00116788	0.0208496	Cox5b-ps
ENSMUSG00000107689	40.9234	1.2638	0.389398	3.24553	0.00117233	0.0208993	Gm44386
ENSMUSG00000038236	272.353	0.923658	0.284667	3.2447	0.00117574	0.0209381	Hoxa7
ENSMUSG00000019975	2285.38	0.262214	0.0808385	3.24368	0.00117995	0.0209469	Ikbip
ENSMUSG00000021241	982.354	0.289222	0.0891536	3.24408	0.0011783	0.0209469	Isca2
ENSMUSG00000056579	9439.36	0.293053	0.0903432	3.24377	0.00117957	0.0209469	Tug1
ENSMUSG00000005202	751.333	-0.577453	0.17812	-3.24193	0.00118723	0.0210541	Shbg
ENSMUSG00000043909	6985.13	-0.220367	0.0679825	-3.24152	0.00118894	0.0210623	Trp53bp1
ENSMUSG00000040373	43.2326	0.965418	0.297951	3.24019	0.00119451	0.0211388	Cacng5
ENSMUSG00000021069	1966.63	0.349133	0.107781	3.2393	0.00119825	0.0211829	Pygl
ENSMUSG00000002396	386.23	-0.353245	0.109061	-3.23896	0.00119967	0.0211858	Ocel1
ENSMUSG00000033685	9974.73	-0.181621	0.056092	-3.23791	0.00120409	0.0212418	Ucp2
ENSMUSG00000039257	601.942	0.564176	0.174274	3.23729	0.00120669	0.0212653	Vstm2b
ENSMUSG00000028525	711.155	0.696471	0.215238	3.23582	0.00121292	0.0213325	Pde4b
ENSMUSG00000040653	297.154	0.592483	0.183115	3.23558	0.00121394	0.0213325	Ppp1r14c
ENSMUSG00000068134	451.355	0.422012	0.130432	3.2355	0.00121428	0.0213325	Zfp120
ENSMUSG00000036529	6281.24	-0.23427	0.0724468	-3.23368	0.00122208	0.0214136	Sbf1
ENSMUSG00000057716	118.608	0.829767	0.256613	3.23353	0.00122269	0.0214136	Tmem178b
ENSMUSG00000091345	87.9373	1.26154	0.390133	3.2336	0.00122239	0.0214136	Col6a5
ENSMUSG00000052632	1863.49	-0.240587	0.0744476	-3.23162	0.00123089	0.0215349	Asap2
ENSMUSG00000005198	17128.5	-0.274574	0.0850083	-3.22997	0.00123805	0.0215931	Polr2a
ENSMUSG00000026112	4019.85	0.21654	0.0670306	3.23046	0.00123591	0.0215931	Coa5
ENSMUSG00000049184	859.222	-0.304295	0.0942098	-3.22997	0.00123804	0.0215931	Purg
ENSMUSG00000032036	221.803	-0.69291	0.21466	-3.22794	0.00124684	0.021724	Kirrel3
ENSMUSG00000063760	1266.37	0.276583	0.0856996	3.22736	0.0012494	0.0217463	Rnf217
ENSMUSG00000000631	7949.01	-0.503807	0.156314	-3.22304	0.00126836	0.0220535	Myo18a
ENSMUSG00000036840	1186.03	0.282932	0.0878001	3.22246	0.00127095	0.0220759	Siah1a
ENSMUSG00000037762	193.881	0.591723	0.183648	3.22205	0.00127278	0.022085	Slc16a9
ENSMUSG00000031201	1347.73	0.277738	0.0862177	3.22135	0.00127587	0.0220984	Brcc3
ENSMUSG00000043131	7062.65	0.233476	0.0724858	3.22099	0.00127747	0.0220984	Mob1a
ENSMUSG00000057606	51.0614	-0.868264	0.269559	-3.22105	0.00127723	0.0220984	Colq
ENSMUSG00000022488	144.819	-0.506203	0.157227	-3.21956	0.00128389	0.0221868	Nckap1l
ENSMUSG00000042961	4899.75	-0.418408	0.130013	-3.21819	0.00129002	0.02227	Egflam
ENSMUSG00000054659	159.643	0.583744	0.181507	3.2161	0.00129944	0.0223869	Pm20d2
ENSMUSG00000068328	2154.75	-0.259217	0.0805933	-3.21636	0.00129829	0.0223869	Aup1
ENSMUSG00000033207	84.7075	-0.824477	0.256448	-3.21498	0.00130453	0.0224517	Mamdc2
ENSMUSG00000040428	899.874	-0.365109	0.113674	-3.21188	0.00131868	0.0226491	Plekha4
ENSMUSG00000049489	794.218	0.351839	0.109535	3.21211	0.00131766	0.0226491	Ccnq
ENSMUSG00000017057	966.915	0.43017	0.133983	3.21062	0.00132447	0.0227256	Il13ra1
ENSMUSG00000018821	433.478	0.618964	0.192943	3.20802	0.00133653	0.0227937	Avpi1
ENSMUSG00000028403	1357.72	0.278773	0.0868668	3.2092	0.00133107	0.0227937	Zdhhc21
ENSMUSG00000030730	87.7323	-1.20726	0.376195	-3.20914	0.00133132	0.0227937	Atp2a1
ENSMUSG00000031706	1985.14	-0.258755	0.0806445	-3.20859	0.00133385	0.0227937	Rfx1
ENSMUSG00000050541	334.74	0.517421	0.161285	3.20813	0.00133603	0.0227937	Adra1b
ENSMUSG00000116033	58.3122	-0.978137	0.304842	-3.20867	0.00133349	0.0227937	Gm49442
ENSMUSG00000022144	1793.63	-0.47999	0.149795	-3.20432	0.00135382	0.0229728	Gdnf
ENSMUSG00000024487	2808.99	0.223298	0.0696737	3.2049	0.00135109	0.0229728	Yipf5
ENSMUSG00000031231	3082.69	0.414325	0.129262	3.20531	0.00134915	0.0229728	Cox7b
ENSMUSG00000049960	1482.96	0.362588	0.113148	3.20456	0.00135271	0.0229728	Mrps16
ENSMUSG00000086863	16.8505	1.63461	0.510062	3.20473	0.00135189	0.0229728	Gm15543
ENSMUSG00000044951	27.2255	-2.46615	0.769732	-3.20391	0.00135574	0.0229824	Mylk4
ENSMUSG00000032479	12627.5	-0.30772	0.096111	-3.20171	0.00136613	0.0231122	Map4
ENSMUSG00000054256	2860.25	-0.29812	0.0931108	-3.20178	0.00136581	0.0231122	Msi1
ENSMUSG00000037720	2713	0.272088	0.0850009	3.201	0.00136951	0.0231232	Tmem33
ENSMUSG00000058420	257.631	0.462582	0.144501	3.20124	0.00136837	0.0231232	Syt17
ENSMUSG00000042570	2290.45	-0.226059	0.0706694	-3.19882	0.00137992	0.0232756	Mier2
ENSMUSG00000028443	493.991	0.390991	0.122243	3.19849	0.00138151	0.0232793	Nudt2
ENSMUSG00000028836	2152.71	0.358028	0.111958	3.19789	0.00138439	0.0233045	Slc30a2
ENSMUSG00000000355	756.156	0.383437	0.119983	3.19576	0.00139463	0.0234303	Mcts1
ENSMUSG00000020838	935.399	0.408196	0.127725	3.1959	0.00139393	0.0234303	Slc6a4
ENSMUSG00000000085	1971.78	-0.310906	0.0973086	-3.19505	0.00139806	0.0234414	Scmh1
ENSMUSG00000086040	1065.67	-0.626465	0.196057	-3.19531	0.00139679	0.0234414	Wipf3
ENSMUSG00000016255	85.1169	-0.876611	0.274491	-3.19359	0.00140516	0.0235371	Tubb1
ENSMUSG00000025010	1391.71	0.327608	0.102671	3.19084	0.0014186	0.0237387	Ccnj
ENSMUSG00000039782	954.122	0.398691	0.125037	3.18859	0.00142968	0.0239006	Cpeb2
ENSMUSG00000027358	807.848	0.494937	0.155238	3.18825	0.00143138	0.0239053	Bmp2
ENSMUSG00000028970	241.671	-0.810156	0.254231	-3.18669	0.00143912	0.0240109	Abcb1b
ENSMUSG00000072294	1592.53	0.435513	0.136699	3.18592	0.00144292	0.0240506	Klf12
ENSMUSG00000000058	289.524	0.739415	0.232183	3.18462	0.00144945	0.0241355	Cav2
ENSMUSG00000031004	23585.6	-0.344748	0.108403	-3.18025	0.00147147	0.0244783	Mki67
ENSMUSG00000022802	848.722	-0.329438	0.103604	-3.17979	0.00147381	0.024493	Lmln
ENSMUSG00000000295	1043.38	0.321572	0.101167	3.17863	0.0014797	0.0245428	Hddc2
ENSMUSG00000029819	114.5	-1.3875	0.436487	-3.17878	0.00147895	0.0245428	Npy
ENSMUSG00000003031	3024.62	0.25722	0.0809854	3.17613	0.00149255	0.0247074	Cdkn1b
ENSMUSG00000086695	28.7511	-1.88235	0.592607	-3.17639	0.00149119	0.0247074	Gm15247
ENSMUSG00000043923	400.908	-0.40698	0.128164	-3.17547	0.00149596	0.0247155	Ccdc84
ENSMUSG00000078706	1211.21	-0.537683	0.169315	-3.17563	0.00149514	0.0247155	Gm53
ENSMUSG00000038628	2525.75	0.293744	0.0925192	3.17495	0.0014986	0.024735	Polr3k
ENSMUSG00000035105	909.354	0.667985	0.210417	3.17458	0.00150056	0.0247431	Egln3
ENSMUSG00000023367	2531.12	0.298	0.0938871	3.17403	0.0015034	0.0247658	Tmem176a
ENSMUSG00000032724	2246.01	-0.395486	0.124618	-3.17359	0.00150565	0.0247788	Abtb2
ENSMUSG00000023007	2923.32	-0.292325	0.0921204	-3.17329	0.0015072	0.0247803	Prpf40b
ENSMUSG00000087413	92.9284	0.95496	0.301026	3.17234	0.00151213	0.0248372	Gm11266
ENSMUSG00000005320	431.67	0.581781	0.183409	3.17204	0.00151373	0.0248393	Fgfr4
ENSMUSG00000025369	8882.7	-0.34151	0.107683	-3.17143	0.00151692	0.0248675	Smarcc2
ENSMUSG00000027978	344.407	-0.660242	0.208248	-3.17046	0.001522	0.0249266	Prss12
ENSMUSG00000031309	6233.74	0.243924	0.0769454	3.17009	0.00152392	0.0249339	Rps6ka3
ENSMUSG00000078139	20.883	1.35831	0.428516	3.16979	0.0015255	0.0249356	AK157302
ENSMUSG00000020687	5475.8	0.331709	0.104693	3.1684	0.00153281	0.0250114	Cdc27
ENSMUSG00000037306	1431.47	-0.413177	0.130408	-3.16835	0.00153309	0.0250114	Man1c1
ENSMUSG00000021373	928.557	0.378859	0.119607	3.16754	0.00153734	0.0250565	Cap2
ENSMUSG00000039278	13.0522	2.41633	0.763059	3.16663	0.00154218	0.0251112	Pcsk1n
ENSMUSG00000027397	4322.46	-0.236262	0.0746202	-3.16619	0.00154451	0.0251129	Slc20a1
ENSMUSG00000054499	874.389	-0.65733	0.207618	-3.16605	0.00154525	0.0251129	Dedd2
ENSMUSG00000007603	2418.17	-0.315694	0.099734	-3.16536	0.00154892	0.0251485	Dus3l
ENSMUSG00000050777	220.16	0.545232	0.172303	3.16439	0.0015541	0.0252084	Tmem37
ENSMUSG00000002944	560.472	0.57527	0.181894	3.16267	0.00156331	0.0252859	Cd36
ENSMUSG00000025937	699.441	0.426535	0.134866	3.16266	0.00156337	0.0252859	Lactb2
ENSMUSG00000091285	16.0055	2.09711	0.663058	3.16279	0.00156266	0.0252859	Gm17430
ENSMUSG00000019301	462.312	-0.587558	0.185978	-3.15928	0.00158157	0.0254586	Hsd17b1
ENSMUSG00000021072	4014.54	0.222108	0.0703011	3.15938	0.00158105	0.0254586	Tmx1
ENSMUSG00000021221	860.207	0.469085	0.148441	3.16009	0.00157721	0.0254586	Dpf3
ENSMUSG00000037519	5756.78	-0.26593	0.0841691	-3.15947	0.00158056	0.0254586	Ppfia1
ENSMUSG00000050538	190.998	0.522755	0.165423	3.16011	0.0015771	0.0254586	B230217C12Rik
ENSMUSG00000052305	18978.7	-0.867949	0.274817	-3.15828	0.00158702	0.0254979	Hbb-bs
ENSMUSG00000063146	3446.21	-0.408801	0.129428	-3.15851	0.0015858	0.0254979	Clip2
ENSMUSG00000019988	1838.14	0.22323	0.0706966	3.15758	0.00159086	0.0255352	Nedd1
ENSMUSG00000032898	8645.28	-0.202741	0.0642159	-3.15718	0.001593	0.0255455	Fbxo21
ENSMUSG00000026255	756.956	-0.560179	0.177456	-3.15672	0.00159554	0.0255619	Efhd1
ENSMUSG00000002486	819.065	-0.275531	0.0873222	-3.15534	0.00160313	0.0256591	Tchp
ENSMUSG00000015879	491.67	-0.311384	0.0987024	-3.15478	0.00160621	0.0256841	Fam184b
ENSMUSG00000031461	36.0826	-1.74275	0.552766	-3.15279	0.00161719	0.0258353	Myom2
ENSMUSG00000054263	3659.43	0.435362	0.138156	3.15123	0.00162585	0.0259492	Lifr
ENSMUSG00000054136	8.95084	2.94601	0.935071	3.15057	0.00162952	0.0259833	Adm2
ENSMUSG00000024858	3480.22	-0.240886	0.0764657	-3.15026	0.00163128	0.0259868	Grk2
ENSMUSG00000021509	197.788	0.973265	0.30899	3.14982	0.0016337	0.0259936	Slc25a48
ENSMUSG00000021589	5893.11	0.219873	0.0698162	3.14931	0.00163655	0.0259936	Rhobtb3
ENSMUSG00000032047	6805.69	0.214945	0.0682563	3.14908	0.00163785	0.0259936	Acat1
ENSMUSG00000038173	482.851	0.320092	0.101634	3.14945	0.00163577	0.0259936	Enpp6
ENSMUSG00000020412	2877.28	-0.196578	0.0624961	-3.14544	0.00165835	0.0262943	Ascc2
ENSMUSG00000025956	571.951	0.333351	0.106021	3.14418	0.00166551	0.026383	Mettl21a
ENSMUSG00000033767	3546.34	-0.224581	0.0714393	-3.14365	0.00166853	0.0264062	Tmem131l
ENSMUSG00000051727	18921.6	0.361894	0.115131	3.14332	0.00167046	0.0264119	Kctd14
ENSMUSG00000020267	6412.97	0.447737	0.142501	3.14199	0.00167806	0.0265074	Hint1
ENSMUSG00000021244	7057.94	-0.314388	0.100088	-3.14112	0.00168306	0.0265616	Ylpm1
ENSMUSG00000026944	2242.63	-0.392987	0.125202	-3.13882	0.00169629	0.0267047	Abca2
ENSMUSG00000036422	943.527	0.609438	0.194168	3.13872	0.00169687	0.0267047	Pcdh8
ENSMUSG00000037808	1647.89	0.240205	0.0765193	3.13914	0.00169446	0.0267047	Fam76b
ENSMUSG00000060012	2144.4	-0.23553	0.0750606	-3.13786	0.00170185	0.0267583	Kif13b
ENSMUSG00000038563	1472.18	-0.257748	0.0821609	-3.13711	0.00170622	0.0268021	Efl1
ENSMUSG00000046999	473.875	-0.62659	0.199922	-3.13417	0.00172338	0.0270466	1110032F04Rik
ENSMUSG00000035262	56416.5	-0.468825	0.149733	-3.13106	0.00174175	0.0272842	Amh
ENSMUSG00000061474	574.352	0.565534	0.180605	3.13133	0.00174016	0.0272842	Mrps36
ENSMUSG00000033389	534.318	-0.39029	0.124694	-3.12999	0.00174813	0.0273588	Arhgap44
ENSMUSG00000037020	823.963	-0.364226	0.116526	-3.12569	0.00177387	0.027736	Wdr62
ENSMUSG00000027584	116.999	0.730014	0.233693	3.12381	0.00178523	0.0278622	Oprl1
ENSMUSG00000044934	1046.27	0.288214	0.0922602	3.12393	0.00178455	0.0278622	Zfp367
ENSMUSG00000020263	2530.99	-0.318346	0.101976	-3.12176	0.00179772	0.0280311	Appl2
ENSMUSG00000022811	5151.5	0.195603	0.0626644	3.12144	0.00179968	0.028036	Zfp148
ENSMUSG00000069920	1387.31	0.369951	0.118562	3.12033	0.00180648	0.0281159	B3gnt9
ENSMUSG00000020612	22523.3	0.170386	0.0546164	3.11969	0.00181039	0.0281509	Prkar1a
ENSMUSG00000069237	3168.73	0.244503	0.0783845	3.11928	0.00181294	0.0281646	Fam8a1
ENSMUSG00000030753	4789.18	0.221026	0.0708865	3.11803	0.00182065	0.0282345	Thap12
ENSMUSG00000039738	2561.55	-0.280967	0.090111	-3.11801	0.00182078	0.0282345	Slx4
ENSMUSG00000032783	869.859	-0.299531	0.0962272	-3.11275	0.00185353	0.0287162	Troap
ENSMUSG00000026675	1942.27	0.604698	0.194311	3.11201	0.00185818	0.0287619	Hsd17b7
ENSMUSG00000042632	1830.52	-0.310057	0.0996671	-3.11093	0.001865	0.0288161	Pla2g6
ENSMUSG00000070934	3359.39	0.237626	0.0763846	3.11091	0.00186509	0.0288161	Rraga
ENSMUSG00000028116	22.4019	-1.94633	0.625771	-3.11029	0.00186906	0.028851	Myoz2
ENSMUSG00000020806	1110.14	-0.356705	0.114747	-3.10862	0.00187964	0.0289615	Rhbdf2
ENSMUSG00000096956	740.313	0.463146	0.148979	3.1088	0.00187847	0.0289615	Snhg18
ENSMUSG00000055447	1561.77	0.38504	0.123881	3.10815	0.00188263	0.0289813	Cd47
ENSMUSG00000030960	720.604	0.314318	0.101145	3.1076	0.00188612	0.0289822	Eef1akmt2
ENSMUSG00000047832	3457.32	0.314959	0.101343	3.10785	0.00188452	0.0289822	Cdca4
ENSMUSG00000097375	132.771	0.856472	0.27565	3.1071	0.00188933	0.0290051	6720427I07Rik
ENSMUSG00000001517	4311.72	-0.209823	0.0675438	-3.10647	0.00189337	0.0290408	Foxm1
ENSMUSG00000026950	181.839	-1.0974	0.35341	-3.10518	0.00190162	0.0291409	Neb
ENSMUSG00000060904	5167.76	0.215977	0.069581	3.10396	0.00190948	0.0292248	Arl1
ENSMUSG00000115497	15.4981	-1.79156	0.577215	-3.1038	0.00191055	0.0292248	Gm49207
ENSMUSG00000021290	2266.15	0.522548	0.168396	3.10308	0.00191516	0.0292424	Atp5mpl
ENSMUSG00000052146	16599.3	0.344314	0.110958	3.10311	0.00191501	0.0292424	Rps10
ENSMUSG00000022433	4757.38	-0.210488	0.0678509	-3.10221	0.00192085	0.0293029	Csnk1e
ENSMUSG00000034116	66.5046	-0.890415	0.287093	-3.10149	0.0019255	0.029321	Vav1
ENSMUSG00000038119	7018.22	0.370253	0.119375	3.1016	0.00192477	0.029321	Cdon
ENSMUSG00000046441	440.568	0.352163	0.113562	3.10107	0.00192825	0.0293364	Cmtr2
ENSMUSG00000031167	8546.26	0.300161	0.0968165	3.10031	0.0019332	0.0293853	Rbm3
ENSMUSG00000031995	316.065	-0.436913	0.140961	-3.09952	0.00193832	0.0294367	St14
ENSMUSG00000000340	1913.54	0.264288	0.0853447	3.09671	0.00195679	0.0296651	Dbt
ENSMUSG00000031765	688.377	1.52987	0.494034	3.0967	0.00195687	0.0296651	Mt1
ENSMUSG00000059474	5932.59	0.248963	0.0804195	3.0958	0.00196282	0.0297287	Mbtd1
ENSMUSG00000035842	1846.74	-0.283499	0.0916249	-3.09412	0.00197397	0.0298708	Ddx11
ENSMUSG00000019966	10004.7	0.240118	0.0776567	3.09205	0.00198782	0.0300536	Kitl
ENSMUSG00000010607	854.737	0.450464	0.14575	3.09067	0.00199706	0.0301394	Pigyl
ENSMUSG00000026600	5904.73	0.311985	0.100936	3.09093	0.00199532	0.0301394	Soat1
ENSMUSG00000032281	9972.17	0.366426	0.118605	3.08946	0.00200519	0.0302351	Acsbg1
ENSMUSG00000029345	3162.75	-0.272193	0.0881202	-3.08888	0.00200911	0.0302673	Tfip11
ENSMUSG00000032352	1427.7	-0.219411	0.071039	-3.0886	0.00201105	0.0302696	Lrrc1
ENSMUSG00000027366	2594.25	0.260257	0.0843131	3.08679	0.00202331	0.030427	Sppl2a
ENSMUSG00000040264	129.42	0.74878	0.242635	3.08604	0.00202842	0.0304497	Gbp2b
ENSMUSG00000048087	1527.36	-0.381046	0.123464	-3.0863	0.00202663	0.0304497	Ahcyl
ENSMUSG00000020265	7172.23	0.275792	0.0893858	3.08541	0.0020327	0.0304869	Sumo3
ENSMUSG00000041426	873.819	0.295695	0.0959236	3.08261	0.00205195	0.0307484	Hibch
ENSMUSG00000038346	3375.12	-0.182254	0.0591641	-3.08048	0.00206668	0.0309416	Zfp384
ENSMUSG00000052085	953.725	0.497873	0.161642	3.0801	0.00206929	0.0309533	Dock8
ENSMUSG00000024059	579.335	-0.33015	0.107228	-3.07896	0.00207727	0.0309934	Clip4
ENSMUSG00000027368	172.97	0.904096	0.293665	3.07867	0.00207929	0.0309934	Dusp2
ENSMUSG00000037509	745.599	-0.582259	0.189123	-3.07874	0.00207879	0.0309934	Arhgef4
ENSMUSG00000091264	1388.8	0.308294	0.100121	3.07921	0.00207551	0.0309934	Smim13
ENSMUSG00000023456	16059.3	0.444488	0.144504	3.07596	0.00209829	0.0312489	Tpi1
ENSMUSG00000059714	1562.76	-0.219548	0.0714167	-3.07419	0.00211076	0.031407	Flot1
ENSMUSG00000021670	9358.3	0.487868	0.15881	3.07202	0.00212617	0.0316085	Hmgcr
ENSMUSG00000027582	1654.91	-0.380898	0.124037	-3.07084	0.00213454	0.0316496	Zgpat
ENSMUSG00000038604	2894.95	-0.272491	0.0887228	-3.07126	0.00213157	0.0316496	Ripor1
ENSMUSG00000042063	1005.72	0.318647	0.103759	3.07102	0.0021333	0.0316496	Zfp386
ENSMUSG00000002633	230.438	0.840037	0.273631	3.06996	0.0021409	0.031716	Shh
ENSMUSG00000116989	851.595	0.510858	0.166497	3.06827	0.00215301	0.0318676	Gm49709
ENSMUSG00000069662	23519.9	0.433521	0.141378	3.06639	0.00216659	0.0320405	Marcks
ENSMUSG00000067430	935.981	0.307822	0.100473	3.06374	0.00218588	0.0322975	Zfp763
ENSMUSG00000035561	4314.94	0.211894	0.0691818	3.06286	0.00219235	0.0323649	Aldh1b1
ENSMUSG00000024045	6067.3	-0.277604	0.0906931	-3.06091	0.00220665	0.0325476	Akap8
ENSMUSG00000052914	537.09	0.447689	0.146339	3.05925	0.00221889	0.0326997	Cyp2j6
ENSMUSG00000026532	370.957	-0.838343	0.274112	-3.05839	0.00222529	0.0327654	Spta1
ENSMUSG00000014039	1243.13	-0.234971	0.0768541	-3.05736	0.00223294	0.032821	Prdm15
ENSMUSG00000024079	1251.98	0.334449	0.10939	3.05739	0.00223272	0.032821	Eif2ak2
ENSMUSG00000020681	174.991	0.838793	0.274593	3.05467	0.00225306	0.0330879	Ace
ENSMUSG00000094777	15.209	1.8154	0.594419	3.05408	0.0022575	0.0331244	H2ac24
ENSMUSG00000052539	1792.57	-0.233795	0.0765879	-3.05264	0.00226842	0.0332557	Magi3
ENSMUSG00000049086	1099.88	-0.319942	0.104825	-3.05215	0.0022721	0.0332809	Bmyc
ENSMUSG00000022604	1092.34	0.297338	0.0974294	3.05183	0.00227451	0.0332874	Cep97
ENSMUSG00000001588	249.793	-0.499506	0.163761	-3.05022	0.00228675	0.0334249	Acap1
ENSMUSG00000058794	442.773	-0.541095	0.177404	-3.05007	0.00228786	0.0334249	Nfe2
ENSMUSG00000071654	982.382	0.260306	0.085417	3.04747	0.00230774	0.0336862	Uqcc3
ENSMUSG00000068798	2973.18	0.328872	0.107931	3.04705	0.00231096	0.0337042	Rap1a
ENSMUSG00000031971	421.015	-0.353785	0.116181	-3.04511	0.00232596	0.0338937	Ccsap
ENSMUSG00000026878	9217.24	0.211644	0.0695588	3.04266	0.00234499	0.0340831	Rab14
ENSMUSG00000035469	4765.02	0.224514	0.073795	3.0424	0.00234701	0.0340831	Rcbtb1
ENSMUSG00000039814	438.023	0.352127	0.115733	3.04259	0.00234555	0.0340831	Xkr5
ENSMUSG00000044086	12.8165	-2.15367	0.707826	-3.04265	0.00234505	0.0340831	Lmod3
ENSMUSG00000031170	534.706	-0.4233	0.139181	-3.04138	0.002355	0.034087	Slc38a5
ENSMUSG00000041130	3767.38	-0.307184	0.100981	-3.04199	0.00235023	0.034087	Zfp598
ENSMUSG00000049422	2474.3	-0.477698	0.157059	-3.04151	0.00235395	0.034087	Chchd10
ENSMUSG00000059316	4499.42	-0.264726	0.0870427	-3.04133	0.00235534	0.034087	Slc27a4
ENSMUSG00000040061	2898.1	-0.582599	0.191621	-3.04038	0.00236281	0.0341658	Plcb2
ENSMUSG00000022865	1900.86	0.301677	0.0992491	3.03959	0.00236899	0.0341968	Cxadr
ENSMUSG00000085747	23.4073	-1.59558	0.524927	-3.03962	0.00236876	0.0341968	Slc13a2os
ENSMUSG00000028398	1398.14	0.269842	0.0887894	3.03912	0.00237267	0.0342207	Dmac1
ENSMUSG00000051124	239.128	0.487597	0.160544	3.03716	0.00238816	0.0344147	Gimap9
ENSMUSG00000046314	1107.63	0.318724	0.105079	3.03319	0.00241981	0.0348412	Stxbp6
ENSMUSG00000020288	1682.23	-0.322128	0.106236	-3.0322	0.00242782	0.0349268	Ahsa2
ENSMUSG00000067365	1005.7	0.247244	0.0815742	3.03091	0.00243817	0.0350459	Tmem128
ENSMUSG00000006574	2396.45	-0.867767	0.286338	-3.03057	0.00244093	0.0350557	Slc4a1
ENSMUSG00000028082	3071.91	-0.327512	0.108182	-3.02741	0.0024666	0.0353944	Sh3d19
ENSMUSG00000003352	3300.99	-0.214794	0.0709875	-3.0258	0.00247974	0.035541	Cacnb3
ENSMUSG00000021054	2023.3	0.438847	0.145042	3.02565	0.00248102	0.035541	Sgpp1
ENSMUSG00000034111	1387.63	0.28344	0.0937382	3.02374	0.00249668	0.0357351	Tmed8
ENSMUSG00000026154	775.074	0.462612	0.15302	3.02321	0.0025011	0.0357681	Sdhaf4
ENSMUSG00000030513	9124.14	0.345127	0.114279	3.02003	0.00252749	0.0360845	Pcsk6
ENSMUSG00000040410	488.722	0.33895	0.112233	3.02005	0.00252735	0.0360845	Fbxl4
ENSMUSG00000024891	356.556	-0.469428	0.15552	-3.01844	0.00254076	0.0362433	Slc29a2
ENSMUSG00000029603	763.132	-0.747868	0.247827	-3.01771	0.00254695	0.0363011	Dtx1
ENSMUSG00000009575	19824.8	0.249378	0.0826849	3.016	0.00256129	0.0363416	Cbx5
ENSMUSG00000022148	82.3351	-0.800333	0.265373	-3.01588	0.00256239	0.0363416	Fyb
ENSMUSG00000025878	1430.46	-0.318099	0.105442	-3.01683	0.00255435	0.0363416	Uimc1
ENSMUSG00000033938	2361.1	0.361322	0.119765	3.01694	0.00255343	0.0363416	Ndufb7
ENSMUSG00000041633	781.514	0.405784	0.134551	3.01584	0.00256268	0.0363416	Kctd12b
ENSMUSG00000115783	1799.55	1.32258	0.438481	3.01628	0.00255894	0.0363416	Bc1
ENSMUSG00000021716	1411.56	0.294841	0.0977927	3.01496	0.00257014	0.0363932	Srek1ip1
ENSMUSG00000029434	2627.34	-0.184879	0.0613218	-3.0149	0.00257062	0.0363932	Vps33a
ENSMUSG00000016252	4348.81	0.50457	0.167432	3.01358	0.00258186	0.0365217	Atp5e
ENSMUSG00000035296	16.506	-1.90002	0.630644	-3.01283	0.00258827	0.0365818	Sgcg
ENSMUSG00000037894	16615.6	0.32929	0.109357	3.01114	0.00260271	0.0367245	H2az1
ENSMUSG00000056260	709.814	0.358241	0.11897	3.0112	0.0026022	0.0367245	Lrif1
ENSMUSG00000044709	1732.42	0.254263	0.0844628	3.01035	0.00260944	0.0367888	Gemin7
ENSMUSG00000054894	309.755	0.395799	0.131531	3.00917	0.00261965	0.036902	Dmac2l
ENSMUSG00000022257	5154.91	0.275578	0.0916016	3.00844	0.00262595	0.03696	Laptm4b
ENSMUSG00000024750	5344.56	0.258884	0.0860604	3.00817	0.00262827	0.0369618	Zfand5
ENSMUSG00000030583	2830.65	-0.292565	0.0972704	-3.00775	0.00263194	0.0369826	Sipa1l3
ENSMUSG00000027933	8210.14	-0.267238	0.0888625	-3.00732	0.00263566	0.0370042	Ints3
ENSMUSG00000050043	2846.68	-0.200536	0.0667136	-3.00592	0.00264781	0.037144	Tmx2
ENSMUSG00000030536	7744.67	-0.320365	0.106598	-3.00537	0.00265262	0.0371806	Iqgap1
ENSMUSG00000002608	2515.46	-0.215496	0.071725	-3.00448	0.00266039	0.0372586	Ccdc97
ENSMUSG00000004771	3950.06	0.265274	0.0883717	3.00179	0.00268393	0.0375263	Rab11a
ENSMUSG00000042473	1075.47	0.283992	0.0947477	2.99734	0.00272343	0.0380471	Tbc1d8b
ENSMUSG00000043067	5848.82	0.188091	0.0627691	2.99655	0.00273056	0.0381152	Dpy19l1
ENSMUSG00000066141	33.9249	-0.947879	0.316397	-2.99585	0.0027368	0.0381708	Gm11232
ENSMUSG00000079614	4338.26	0.358467	0.119681	2.99519	0.00274277	0.0382226	Seh1l
ENSMUSG00000030739	591.666	-0.405732	0.13554	-2.99345	0.0027584	0.0384087	Myh14
ENSMUSG00000029126	1765.16	0.273955	0.0916192	2.99014	0.00278845	0.0387953	Nsg1
ENSMUSG00000037253	7376.13	0.319952	0.107063	2.98846	0.00280387	0.0389777	Mex3c
ENSMUSG00000053317	2861.52	0.374597	0.125372	2.98787	0.00280925	0.0390205	Sec61b
ENSMUSG00000029657	6745.66	-0.672562	0.225234	-2.98606	0.002826	0.0392209	Hsph1
ENSMUSG00000033184	5597.39	0.284203	0.0953475	2.98071	0.00287585	0.0398474	Tmed7
ENSMUSG00000056004	182.064	0.536029	0.179825	2.98083	0.00287464	0.0398474	Elapor2
ENSMUSG00000021365	5130.14	-0.253163	0.0850179	-2.97776	0.00290366	0.0401445	Nedd9
ENSMUSG00000025899	2343.44	0.217276	0.0729653	2.97779	0.00290331	0.0401445	Alkbh8
ENSMUSG00000037815	17708.9	-0.196729	0.0660678	-2.97768	0.00290441	0.0401445	Ctnna1
ENSMUSG00000071531	198.92	0.541323	0.181919	2.97563	0.00292388	0.0403806	Gprin2
ENSMUSG00000025091	136.646	-0.957785	0.321934	-2.97509	0.00292899	0.0404181	Pnliprp2
ENSMUSG00000025145	1626.93	-0.501707	0.168681	-2.97429	0.00293671	0.0404916	Lrrc45
ENSMUSG00000002661	740.62	0.281182	0.09456	2.97358	0.00294346	0.0405187	Alkbh7
ENSMUSG00000064138	2318.18	0.221232	0.0743963	2.97369	0.00294242	0.0405187	Fam172a
ENSMUSG00000024187	5418.3	-0.289974	0.0975407	-2.97285	0.00295045	0.0405818	Fam234a
ENSMUSG00000030255	1262.12	0.446366	0.150163	2.97254	0.00295342	0.0405898	Sspn
ENSMUSG00000005958	1466.28	-0.259279	0.0872368	-2.97212	0.00295748	0.0405898	Ephb3
ENSMUSG00000036206	2842.53	-0.238745	0.0803304	-2.97205	0.00295823	0.0405898	Sh3bp4
ENSMUSG00000029510	440.999	-0.613175	0.206355	-2.97146	0.00296384	0.0406339	Gpc2
ENSMUSG00000004085	707.896	0.353479	0.11901	2.97016	0.00297644	0.0407737	Map3k20
ENSMUSG00000025082	109.689	-0.808449	0.272237	-2.96965	0.00298135	0.0407748	Vwa2
ENSMUSG00000076617	61.5728	-0.976983	0.328971	-2.96982	0.00297976	0.0407748	Ighm
ENSMUSG00000051234	4268.04	0.310197	0.104523	2.96774	0.00299994	0.040996	Rnf7
ENSMUSG00000017478	6751.87	-0.368181	0.124148	-2.96566	0.00302032	0.0411415	Zc3h18
ENSMUSG00000026584	1206.13	-0.277091	0.0934295	-2.96578	0.00301916	0.0411415	Scyl3
ENSMUSG00000033863	262.445	0.582751	0.196468	2.96614	0.00301562	0.0411415	Klf9
ENSMUSG00000049739	4141.99	-0.241636	0.0814737	-2.96581	0.00301884	0.0411415	Zfp646
ENSMUSG00000024797	107.044	-0.62566	0.211032	-2.96476	0.00302915	0.0412286	Vps51
ENSMUSG00000027375	2117.9	0.576885	0.194657	2.9636	0.00304065	0.0413519	Mal
ENSMUSG00000026080	673.115	-0.297851	0.100517	-2.96318	0.00304481	0.0413752	Chst10
ENSMUSG00000029547	6570.62	-0.308073	0.103987	-2.96261	0.00305039	0.0414177	Ints1
ENSMUSG00000003575	2794.97	-0.299733	0.101213	-2.9614	0.00306242	0.0415478	Crtc1
ENSMUSG00000017119	8532.68	-0.240897	0.0813593	-2.9609	0.00306741	0.0415488	Nbr1
ENSMUSG00000042029	3369.81	0.292137	0.0986617	2.961	0.00306645	0.0415488	Ncapg2
ENSMUSG00000025940	1607.17	0.299744	0.101247	2.96052	0.00307121	0.041567	Tmem70
ENSMUSG00000021257	629.92	-0.299134	0.101063	-2.95988	0.00307763	0.0416205	Angel1
ENSMUSG00000003269	4094.56	-0.213462	0.0721282	-2.95949	0.00308153	0.04164	Cyth2
ENSMUSG00000022340	726.687	0.385357	0.130248	2.95864	0.00308998	0.0417209	Sybu
ENSMUSG00000028911	6275.4	-0.231287	0.0781866	-2.95814	0.00309499	0.0417219	Srsf4
ENSMUSG00000063434	232.372	-0.700885	0.236929	-2.95821	0.00309436	0.0417219	Sorcs3
ENSMUSG00000030222	1658.94	0.279354	0.0944526	2.95761	0.00310038	0.0417281	Rerg
ENSMUSG00000078784	1261.32	0.513969	0.173772	2.95772	0.00309922	0.0417281	Rbis
ENSMUSG00000049288	5837.28	0.245627	0.083083	2.95641	0.00311244	0.0418571	Lix1l
ENSMUSG00000008822	382.415	0.428562	0.145006	2.95547	0.00312191	0.0419045	Acyp1
ENSMUSG00000039376	73.7505	-1.48425	0.502227	-2.95533	0.00312335	0.0419045	Synpo2l
ENSMUSG00000049421	5394.46	0.198823	0.0672761	2.95533	0.00312339	0.0419045	Zfp260
ENSMUSG00000031790	8984.8	-0.361221	0.122263	-2.95446	0.00313221	0.0419311	Mmp15
ENSMUSG00000049119	1162.63	-0.330677	0.111922	-2.95453	0.00313142	0.0419311	Fam110b
ENSMUSG00000071656	77.353	0.682682	0.231073	2.9544	0.00313281	0.0419311	Lrrn4cl
ENSMUSG00000037148	1923.43	-0.214747	0.0726955	-2.95407	0.00313613	0.0419423	Arhgap10
ENSMUSG00000025241	2892.67	0.358741	0.121463	2.9535	0.00314196	0.0419872	Fyco1
ENSMUSG00000034940	2956.83	-0.347564	0.117689	-2.95325	0.00314447	0.0419875	Synrg
ENSMUSG00000061859	1629.44	-0.220392	0.0746365	-2.95287	0.00314834	0.042006	Patj
ENSMUSG00000023828	28.6133	-1.55371	0.526264	-2.95233	0.00315386	0.0420465	Slc22a3
ENSMUSG00000045667	3346.71	-0.243225	0.0823965	-2.95188	0.00315841	0.042074	Smtnl2
ENSMUSG00000030890	162.687	-0.731117	0.247753	-2.95099	0.00316754	0.0421452	Ilk
ENSMUSG00000034220	9751.09	-0.262438	0.0889357	-2.95088	0.00316874	0.0421452	Gpc1
ENSMUSG00000005417	19741.4	-0.209735	0.0711465	-2.94793	0.0031991	0.0425156	Mprip
ENSMUSG00000030400	1233.43	-0.268789	0.0911988	-2.94728	0.00320581	0.0425714	Ercc2
ENSMUSG00000027871	19201.6	0.512757	0.174027	2.94643	0.00321469	0.0426557	Hsd3b1
ENSMUSG00000025020	128.648	-0.967528	0.328497	-2.94532	0.00322624	0.0427671	Slit1
ENSMUSG00000041161	655.193	-0.408245	0.138617	-2.94514	0.00322814	0.0427671	Otud3
ENSMUSG00000066829	815.086	0.330877	0.112357	2.94486	0.00323096	0.042771	Zfp810
ENSMUSG00000012520	9.27326	3.02066	1.02625	2.94339	0.00324635	0.0429411	Phox2b
ENSMUSG00000048865	79.5975	-0.763176	0.259331	-2.94287	0.00325189	0.0429809	Arhgap30
ENSMUSG00000074093	201.59	0.476501	0.161967	2.94197	0.00326132	0.0430718	Svip
ENSMUSG00000024259	1603.78	0.244628	0.0831666	2.94142	0.0032671	0.0430809	Slc25a46
ENSMUSG00000052105	3229.74	-0.335739	0.114135	-2.9416	0.00326519	0.0430809	Mtcl1
ENSMUSG00000030560	648.319	0.589389	0.200521	2.93928	0.00328975	0.043312	Ctsc
ENSMUSG00000055761	204.762	0.74004	0.251804	2.93895	0.00329322	0.043324	Nkain3
ENSMUSG00000010066	969.816	-0.881449	0.300202	-2.93619	0.0033227	0.0436779	Cacna2d2
ENSMUSG00000061273	1675.66	0.245064	0.083475	2.93578	0.0033271	0.0437018	Mmgt1
ENSMUSG00000027569	1579.49	-0.304822	0.103887	-2.93417	0.00334444	0.0438614	Mrgbp
ENSMUSG00000036817	3649.86	-0.219784	0.0749036	-2.93422	0.00334384	0.0438614	Sun1
ENSMUSG00000035171	1105.97	0.373769	0.127518	2.93111	0.00337756	0.0442615	1110059E24Rik
ENSMUSG00000106918	1524.93	0.374467	0.127794	2.93025	0.00338694	0.04435	Mrpl33
ENSMUSG00000028278	1151.05	-0.278638	0.0951064	-2.92975	0.00339233	0.044353	Rragd
ENSMUSG00000079111	7360.1	0.222785	0.0760426	2.92974	0.00339241	0.044353	Kdelr2
ENSMUSG00000085354	1896.71	0.466055	0.159118	2.92899	0.00340068	0.0444268	Gm2044
ENSMUSG00000039427	863.78	-0.273896	0.0935416	-2.92807	0.00341079	0.0445244	Alg1
ENSMUSG00000029394	2195.11	0.364772	0.124608	2.92736	0.00341856	0.0445799	Cdk2ap1
ENSMUSG00000040666	81.8501	-0.7809	0.26678	-2.92713	0.00342103	0.0445799	Sh3bgr
ENSMUSG00000053702	41.3748	-1.08972	0.372305	-2.92696	0.00342294	0.0445799	Nebl
ENSMUSG00000080316	1834.08	-0.605778	0.207049	-2.92577	0.00343602	0.0447158	Spaca6
ENSMUSG00000033735	1624.28	0.287309	0.0982229	2.92507	0.00344382	0.0447459	Spr
ENSMUSG00000038611	6589	-0.283499	0.0969225	-2.925	0.00344451	0.0447459	Phrf1
ENSMUSG00000041028	8115.4	0.212862	0.0727772	2.92485	0.00344626	0.0447459	Ghitm
ENSMUSG00000032911	3031.08	-0.428815	0.146654	-2.92398	0.00345582	0.0448355	Cspg4
ENSMUSG00000028221	3179.54	0.211959	0.0724962	2.92372	0.00345874	0.0448391	Pip4p2
ENSMUSG00000074227	6075.61	-0.270414	0.0925095	-2.9231	0.00346564	0.0448941	Spint2
ENSMUSG00000028648	911.702	0.481378	0.164741	2.92204	0.00347749	0.0450132	Ndufs5
ENSMUSG00000006920	1649.59	-0.250287	0.0856828	-2.92109	0.00348808	0.045016	Ezh1
ENSMUSG00000033981	89.7189	-0.96935	0.331867	-2.9209	0.00349023	0.045016	Gria2
ENSMUSG00000042747	1818.36	0.249289	0.0853489	2.92083	0.00349102	0.045016	Krtcap2
ENSMUSG00000068697	37.8966	0.982049	0.33615	2.92146	0.00348398	0.045016	Myoz1
ENSMUSG00000089647	22.6098	1.43764	0.492189	2.92091	0.00349009	0.045016	Gm2245
ENSMUSG00000006423	2060.84	0.206551	0.0707352	2.92007	0.00349956	0.0450918	Steep1
ENSMUSG00000031753	3779.9	-0.227926	0.0780837	-2.91899	0.00351165	0.0452131	Cog4
ENSMUSG00000102976	778.19	0.505027	0.173029	2.91874	0.00351448	0.0452152	Zc3h11a
ENSMUSG00000059482	941.046	0.279547	0.0957976	2.91811	0.00352166	0.0452546	Cfap418
ENSMUSG00000076441	1722.38	-0.321182	0.110069	-2.918	0.0035229	0.0452546	Ass1
ENSMUSG00000002222	5073.09	0.219641	0.075289	2.91731	0.00353068	0.0453203	Rmnd5a
ENSMUSG00000022791	5465.91	-0.245161	0.0840713	-2.91612	0.0035442	0.0454493	Tnk2
ENSMUSG00000054945	69.4889	0.701428	0.240549	2.91595	0.00354611	0.0454493	Gm9958
ENSMUSG00000000215	15.7882	1.64461	0.564226	2.9148	0.00355917	0.0455446	Ins2
ENSMUSG00000002603	1999.26	-0.376281	0.129087	-2.91494	0.00355757	0.0455446	Tgfb1
ENSMUSG00000023050	1328.42	-0.349098	0.119776	-2.91458	0.00356162	0.0455446	Map3k12
ENSMUSG00000032777	11562.9	-0.230668	0.0791677	-2.91366	0.00357218	0.0456451	Gtf3c1
ENSMUSG00000070644	8141.92	-0.268162	0.0920467	-2.91333	0.00357595	0.0456589	Etnk2
ENSMUSG00000030876	5381.53	0.208785	0.0716805	2.91271	0.00358303	0.0456929	Mettl9
ENSMUSG00000041220	5389.45	0.362656	0.124512	2.91263	0.00358403	0.0456929	Elovl6
ENSMUSG00000017417	3521.89	0.373859	0.128372	2.9123	0.0035878	0.0457066	Plxdc1
ENSMUSG00000002052	10104.5	-0.257904	0.0885739	-2.91174	0.0035942	0.045719	Supt6
ENSMUSG00000026421	7213.11	0.170262	0.0584836	2.91127	0.00359958	0.045719	Csrp1
ENSMUSG00000036959	2009.28	-0.333486	0.114526	-2.91187	0.00359272	0.045719	Bcorl1
ENSMUSG00000046798	1357.14	0.283071	0.0972312	2.91132	0.00359904	0.045719	Cldn12
ENSMUSG00000045886	11.5477	2.07613	0.713238	2.91085	0.00360447	0.0457467	Pam16l
ENSMUSG00000001143	1779.51	-0.215366	0.07401	-2.90995	0.00361481	0.0457695	Lman2l
ENSMUSG00000025351	8552.73	0.232839	0.0800165	2.90988	0.00361562	0.0457695	Cd63
ENSMUSG00000032744	4696.6	-0.255742	0.0878913	-2.90976	0.00361708	0.0457695	Heyl
ENSMUSG00000069045	512.787	-2.17091	0.745933	-2.91033	0.0036105	0.0457695	Ddx3y
ENSMUSG00000041797	236.972	0.566406	0.194841	2.90702	0.00364893	0.046138	Abca9
ENSMUSG00000051224	477.337	0.400778	0.1379	2.90629	0.00365741	0.0462106	Tceanc
ENSMUSG00000022890	4524.14	0.27137	0.0933821	2.90602	0.0036606	0.0462164	Atp5j
ENSMUSG00000028068	2093.44	-0.210465	0.0724358	-2.90554	0.00366623	0.046253	Iqgap3
ENSMUSG00000060166	3086.37	-0.22804	0.0785097	-2.9046	0.00367719	0.0463567	Zdhhc8
ENSMUSG00000028348	54.6026	-0.869969	0.299622	-2.90356	0.00368951	0.0464774	Cavin4
ENSMUSG00000000416	722.989	-0.596682	0.205553	-2.90282	0.00369822	0.0465525	Cttnbp2
ENSMUSG00000041779	1463.59	0.238582	0.0822125	2.90202	0.00370769	0.046637	Tram2
ENSMUSG00000029168	1331.02	-0.687147	0.236853	-2.90115	0.003718	0.0467318	Dpysl5
ENSMUSG00000020309	219.009	0.499688	0.172325	2.89967	0.00373552	0.0468824	Chac2
ENSMUSG00000048481	560.883	-0.298579	0.102964	-2.89984	0.0037335	0.0468824	Mypop
ENSMUSG00000019437	798.942	0.348046	0.120118	2.89753	0.00376111	0.0471024	Tlcd1
ENSMUSG00000032392	433.854	0.374592	0.129281	2.89751	0.0037614	0.0471024	Parp16
ENSMUSG00000036315	1125.81	0.259555	0.0895691	2.89782	0.00375766	0.0471024	Polr1h
ENSMUSG00000036553	989.257	0.447112	0.154326	2.8972	0.00376512	0.0471142	Sh3tc1
ENSMUSG00000004843	2329.54	0.270128	0.093262	2.89644	0.00377426	0.047124	Chmp2b
ENSMUSG00000039221	3562.29	0.442574	0.152784	2.89672	0.00377086	0.047124	Rpl22l1
ENSMUSG00000071054	9017.58	-0.28357	0.0978996	-2.89654	0.00377308	0.047124	Safb
ENSMUSG00000031558	6520.89	-0.632431	0.218415	-2.89555	0.00378498	0.047223	Slit2
ENSMUSG00000035885	4660.63	0.32536	0.112381	2.89516	0.0037897	0.047247	Cox8a
ENSMUSG00000022677	1607.25	0.294895	0.10188	2.89454	0.00379713	0.0473027	Cep20
ENSMUSG00000057738	23359.8	-0.326849	0.112928	-2.89432	0.00379976	0.0473027	Sptan1
ENSMUSG00000018334	1839.68	0.264035	0.0912707	2.89288	0.00381731	0.0474862	Ksr1
ENSMUSG00000025575	3293.6	-0.198984	0.0687913	-2.89257	0.00382107	0.0474981	Cant1
ENSMUSG00000026932	1153.1	0.246447	0.085222	2.89182	0.00383012	0.0475756	Nacc2
ENSMUSG00000024927	2741.14	-0.234299	0.081061	-2.89041	0.00384742	0.0476265	Rela
ENSMUSG00000029213	1694.03	0.242175	0.0837933	2.89015	0.00385058	0.0476265	Commd8
ENSMUSG00000032198	4798.16	-0.376683	0.130346	-2.88986	0.00385411	0.0476265	Dock6
ENSMUSG00000050395	28.3818	1.3406	0.463817	2.89036	0.00384803	0.0476265	Tnfsf15
ENSMUSG00000056671	381.273	0.533648	0.184676	2.88965	0.00385674	0.0476265	Prelid2
ENSMUSG00000064225	109.715	0.684109	0.236636	2.89097	0.00384051	0.0476265	Paqr9
ENSMUSG00000069274	16.0616	1.92422	0.665893	2.88969	0.0038562	0.0476265	H4c6
ENSMUSG00000073409	37.2538	1.23424	0.427118	2.88969	0.00385623	0.0476265	H2-Q6
ENSMUSG00000004626	1932.16	-0.258383	0.0894356	-2.88904	0.0038642	0.0476491	Stxbp2
ENSMUSG00000020027	3778.93	-0.269447	0.0932622	-2.88914	0.00386299	0.0476491	Socs2
ENSMUSG00000025902	688.55	-0.655119	0.226797	-2.88858	0.00386992	0.0476636	Sox17
ENSMUSG00000048731	208.85	-0.587163	0.203277	-2.88849	0.00387101	0.0476636	Ggnbp1
ENSMUSG00000026220	20.4951	1.38394	0.479163	2.88824	0.00387398	0.0476655	Slc16a14
ENSMUSG00000028165	1292.53	0.234769	0.0813231	2.88686	0.00389102	0.0478254	Cisd2
ENSMUSG00000039254	1257.68	-0.276777	0.0958791	-2.88673	0.00389264	0.0478254	Pomt1
ENSMUSG00000027111	12328.8	-0.314789	0.109086	-2.88569	0.00390558	0.0479496	Itga6
ENSMUSG00000002007	16.9892	-1.62224	0.562274	-2.88515	0.0039123	0.0479625	Srpk3
ENSMUSG00000020644	3351.22	0.475782	0.164907	2.88516	0.00391214	0.0479625	Id2
ENSMUSG00000024256	59.7708	1.05529	0.365848	2.88451	0.00392021	0.0480247	Adcyap1
ENSMUSG00000003778	5091.53	-0.203026	0.0704474	-2.88196	0.00395214	0.0481717	Brd8
ENSMUSG00000021910	34331.5	-0.219056	0.0759915	-2.88264	0.00394355	0.0481717	Nisch
ENSMUSG00000024294	8222.07	0.276664	0.0959924	2.88214	0.00394979	0.0481717	Mib1
ENSMUSG00000027489	94.0849	0.67648	0.23467	2.88268	0.00394305	0.0481717	Necab3
ENSMUSG00000058740	1466.77	-0.75265	0.26113	-2.88229	0.00394801	0.0481717	Kcnt1
ENSMUSG00000068267	7961.97	0.212446	0.0737063	2.88233	0.00394752	0.0481717	Cenpb
ENSMUSG00000092074	754.866	-0.385454	0.13372	-2.88255	0.00394472	0.0481717	Dynlt1a
ENSMUSG00000025521	500.076	0.284723	0.098845	2.8805	0.00397048	0.0482909	Tmem192
ENSMUSG00000031965	18.1148	-1.37703	0.478045	-2.88054	0.00396992	0.0482909	Tbx20
ENSMUSG00000037408	770.287	-0.304568	0.105727	-2.88069	0.00396803	0.0482909	Cnnm4
ENSMUSG00000031224	339.651	0.352097	0.12225	2.88013	0.00397515	0.048313	Magee2
ENSMUSG00000046994	625.973	0.454099	0.157774	2.87815	0.00400012	0.0485815	Mars2
ENSMUSG00000051159	1154.15	-0.345518	0.120063	-2.87781	0.00400444	0.0485991	Cited1
ENSMUSG00000004945	2584.09	0.265901	0.0924089	2.87744	0.00400913	0.0486211	Tmem242
ENSMUSG00000022863	402.137	0.466432	0.162197	2.87572	0.00403113	0.0488529	Btg3
ENSMUSG00000028681	1390.29	-0.453788	0.157834	-2.87509	0.00403907	0.0489141	Ptch2
ENSMUSG00000032737	11577.4	-0.203091	0.0706638	-2.87405	0.0040525	0.0489715	Inppl1
ENSMUSG00000036672	1567.46	-0.283675	0.0986969	-2.8742	0.00405047	0.0489715	Cenpt
ENSMUSG00000046182	2206.1	0.386591	0.134499	2.87429	0.00404936	0.0489715	Gsg1l
ENSMUSG00000021367	162.676	-0.764373	0.2662	-2.87142	0.00408628	0.0493445	Edn1
ENSMUSG00000029599	4249.97	-0.311113	0.108386	-2.87041	0.00409936	0.0494389	Ddx54
ENSMUSG00000090086	248.823	-0.753891	0.262646	-2.87037	0.00409994	0.0494389	AI480526
ENSMUSG00000025496	30.5101	1.0351	0.360716	2.86958	0.00411013	0.0495265	Drd4
ENSMUSG00000027763	2609.71	0.290449	0.10127	2.86805	0.0041301	0.0497317	Mbnl1
ENSMUSG00000052336	298.603	-0.631611	0.22028	-2.86731	0.00413974	0.0498123	Cx3cr1
ENSMUSG00000021319	309.905	-0.640256	0.223321	-2.86698	0.00414413	0.0498298	Sfrp4
ENSMUSG00000062376	685.311	0.32548	0.113577	2.86573	0.0041605	0.049991	Borcs7
ENSMUSG00000030509	1212.9	0.226926	0.0791955	2.86539	0.00416498	0.0500093	Asb7
ENSMUSG00000018661	1616.33	-0.324666	0.113321	-2.86502	0.00416983	0.050032	Cog1
ENSMUSG00000009681	3788.08	-0.282452	0.0986628	-2.86281	0.00419908	0.0503454	Bcr
ENSMUSG00000020832	1234.5	-0.299274	0.104549	-2.86252	0.00420292	0.0503454	Eral1
ENSMUSG00000029569	2074.66	0.251057	0.0877094	2.86237	0.00420488	0.0503454	Tmem168
ENSMUSG00000114028	9.29599	-2.61905	0.915221	-2.86166	0.00421425	0.050422	9630002D21Rik
ENSMUSG00000071379	3128.53	-0.207872	0.0727454	-2.85752	0.0042696	0.0510481	Hpcal1
ENSMUSG00000027253	1394.19	-0.37573	0.131536	-2.85649	0.00428357	0.051179	Lrp4
ENSMUSG00000073609	809.767	-0.295401	0.103424	-2.85622	0.00428724	0.0511867	D2hgdh
ENSMUSG00000023861	539.251	0.317968	0.111421	2.85375	0.00432059	0.0514759	Mpc1
ENSMUSG00000028457	72.4523	-0.780706	0.273568	-2.85379	0.00432004	0.0514759	Atp8b5
ENSMUSG00000029056	2177.87	-0.234134	0.0820316	-2.85419	0.00431461	0.0514759	Pank4
ENSMUSG00000040794	310.677	0.521121	0.18273	2.85186	0.00434642	0.0516381	C1qtnf4
ENSMUSG00000061111	3901	0.19957	0.0699743	2.85205	0.00434389	0.0516381	Mcrip1
ENSMUSG00000073805	73.6643	-0.704969	0.247191	-2.85192	0.00434563	0.0516381	Insyn2a
ENSMUSG00000075270	98.3033	-0.816586	0.286279	-2.85242	0.00433884	0.0516381	Pde11a
ENSMUSG00000057722	358.497	0.714258	0.250514	2.85117	0.00435591	0.0517146	Lepr
ENSMUSG00000029397	1778.47	0.216302	0.0758811	2.85053	0.00436458	0.0517812	Rchy1
ENSMUSG00000036898	1669.36	0.196346	0.0688873	2.85025	0.00436852	0.0517916	Zfp157
ENSMUSG00000024600	1384.58	-0.246866	0.0866704	-2.84833	0.00439497	0.0518633	Slc27a6
ENSMUSG00000027088	665.075	0.299257	0.105063	2.84836	0.00439453	0.0518633	Phospho2
ENSMUSG00000028382	7000.79	0.281202	0.0986982	2.84911	0.00438415	0.0518633	Ptbp3
ENSMUSG00000029377	39.2198	0.912905	0.320513	2.84826	0.00439585	0.0518633	Ereg
ENSMUSG00000029651	187.061	0.464407	0.16305	2.84825	0.00439603	0.0518633	Mtus2
ENSMUSG00000040220	1302.49	-0.240623	0.0844487	-2.84934	0.004381	0.0518633	Gas8
ENSMUSG00000041939	2111.36	0.392576	0.137815	2.84857	0.00439158	0.0518633	Mvk
ENSMUSG00000024843	3609.5	-0.512719	0.180035	-2.84789	0.00440098	0.0518781	Chka
ENSMUSG00000048581	334.467	0.423609	0.148754	2.84772	0.00440342	0.0518781	E130311K13Rik
ENSMUSG00000030208	13213.3	0.23112	0.0811726	2.84727	0.00440962	0.051915	Emp1
ENSMUSG00000022335	821.698	-0.334134	0.117387	-2.84644	0.00442112	0.0519576	Zfat
ENSMUSG00000023832	3435.97	0.427714	0.150268	2.84634	0.00442245	0.0519576	Acat2
ENSMUSG00000037341	181.401	-0.430731	0.151319	-2.84652	0.00442006	0.0519576	Slc9a7
ENSMUSG00000011179	17514	0.413086	0.145177	2.8454	0.0044356	0.0519887	Odc1
ENSMUSG00000021476	2077.71	-0.230024	0.080827	-2.84588	0.00442885	0.0519887	Habp4
ENSMUSG00000027346	1996.44	0.287471	0.101035	2.84527	0.00443739	0.0519887	Gpcpd1
ENSMUSG00000047230	101.363	1.25846	0.442281	2.84538	0.00443578	0.0519887	Cldn2
ENSMUSG00000031698	381.734	-0.424793	0.149318	-2.84489	0.00444262	0.0519918	Mylk3
ENSMUSG00000037348	748.282	-0.331833	0.116645	-2.84481	0.0044438	0.0519918	Paqr7
ENSMUSG00000033544	92.0384	-1.06737	0.375239	-2.84452	0.00444782	0.0520029	Angptl1
ENSMUSG00000023353	4621.65	-0.215877	0.0759003	-2.84422	0.00445202	0.052016	Agap3
ENSMUSG00000025151	56277.7	-0.190299	0.0669404	-2.84282	0.00447169	0.0521497	Maged1
ENSMUSG00000037257	2699.98	-0.186017	0.0654274	-2.8431	0.00446766	0.0521497	Aagab
ENSMUSG00000056917	4100.73	-0.340176	0.119665	-2.84274	0.00447271	0.0521497	Sipa1
ENSMUSG00000055917	1697.24	0.301262	0.106001	2.84206	0.00448229	0.0522254	Zfp277
ENSMUSG00000026525	273.79	0.43689	0.153777	2.84107	0.00449626	0.0523136	Opn3
ENSMUSG00000053470	5867.82	0.282626	0.0994744	2.84119	0.00449456	0.0523136	Kdm3a
ENSMUSG00000053754	8911.92	-0.277304	0.0976126	-2.84087	0.00449913	0.0523136	Chd8
ENSMUSG00000027708	1831.66	0.282263	0.0994941	2.83698	0.00455418	0.0528811	Dcun1d1
ENSMUSG00000062296	5066.66	-0.678035	0.238981	-2.83719	0.00455126	0.0528811	Trank1
ENSMUSG00000028467	1672.81	-0.340177	0.119937	-2.83631	0.00456388	0.0529242	Gba2
ENSMUSG00000043633	267.079	-0.711193	0.250748	-2.83629	0.00456416	0.0529242	Fam221b
ENSMUSG00000029291	1500.82	-0.236573	0.0834284	-2.83564	0.00457337	0.0529947	Rufy3
ENSMUSG00000032330	3130.95	0.42981	0.151611	2.83495	0.00458334	0.0530376	Cox7a2
ENSMUSG00000037736	1850.31	-0.62588	0.220766	-2.83504	0.00458206	0.0530376	Limch1
ENSMUSG00000095440	1040.42	0.463115	0.16348	2.83285	0.00461345	0.0533496	Fignl2
ENSMUSG00000026475	329.45	-0.532687	0.188203	-2.83039	0.00464918	0.0536575	Rgs16
ENSMUSG00000029480	2398.41	-0.357643	0.126365	-2.83025	0.00465115	0.0536575	Dhx37
ENSMUSG00000031930	3714.12	-0.27588	0.0974713	-2.83037	0.00464939	0.0536575	Wwp2
ENSMUSG00000034064	2601.64	0.18999	0.067131	2.83014	0.00465277	0.0536575	Poglut1
ENSMUSG00000022533	3924.7	0.289493	0.102332	2.82895	0.0046701	0.0538111	Atp13a3
ENSMUSG00000053453	2574.76	0.278622	0.0984952	2.82879	0.00467245	0.0538111	Thoc7
ENSMUSG00000007950	1800.24	0.226138	0.0799688	2.82782	0.00468657	0.053937	Abhd8
ENSMUSG00000050914	151.975	0.797802	0.282184	2.82724	0.00469515	0.053999	Ankrd37
ENSMUSG00000021361	2872.87	0.233381	0.0825605	2.82678	0.00470182	0.054039	Tmem14c
ENSMUSG00000006728	21702.4	0.212388	0.0751646	2.82564	0.00471869	0.05417	Cdk4
ENSMUSG00000023764	1278.83	-0.43688	0.15464	-2.82514	0.00472603	0.05417	Sfi1
ENSMUSG00000032878	91.9644	-0.658363	0.233029	-2.82524	0.00472447	0.05417	Ccdc85a
ENSMUSG00000075271	492.76	0.290817	0.102927	2.82546	0.00472124	0.05417	Ttc30a1
ENSMUSG00000109814	15.8305	1.41657	0.501918	2.8223	0.00476801	0.0546142	Gm45847
ENSMUSG00000024502	154.425	-0.605378	0.214519	-2.82203	0.00477207	0.0546238	Jakmip2
ENSMUSG00000028381	3781.44	0.31662	0.112233	2.82111	0.00478585	0.0547444	Ugcg
ENSMUSG00000053253	1491.18	0.218593	0.0774928	2.82082	0.00479008	0.0547558	Ndfip2
ENSMUSG00000044528	507.833	0.35787	0.126916	2.81973	0.0048064	0.0549052	Tram1l1
ENSMUSG00000078580	541.839	0.275708	0.0977961	2.81921	0.00481419	0.0549571	E430018J23Rik
ENSMUSG00000031432	1132.47	0.253291	0.0898743	2.81828	0.00482818	0.0549685	Prps1
ENSMUSG00000035919	883.74	-0.260604	0.0924626	-2.81848	0.00482515	0.0549685	Bbs9
ENSMUSG00000070044	719.599	0.418131	0.148333	2.81887	0.00481935	0.0549685	Fam149a
ENSMUSG00000111868	18.1036	1.80046	0.638808	2.81846	0.00482542	0.0549685	Gm47398
ENSMUSG00000027132	768.971	0.308329	0.109429	2.81763	0.00483798	0.055043	Katnbl1
ENSMUSG00000006471	416.958	-0.417455	0.148224	-2.81639	0.00485673	0.0551451	Ndor1
ENSMUSG00000028657	8211.07	-0.217112	0.0770841	-2.81656	0.00485414	0.0551451	Ppt1
ENSMUSG00000061981	2635.11	-0.25671	0.0911486	-2.81639	0.00485669	0.0551451	Flot2
ENSMUSG00000039485	261.729	0.611535	0.217188	2.81569	0.00486722	0.0552271	Tspyl4
ENSMUSG00000057315	788.811	-0.420503	0.149428	-2.81409	0.00489157	0.0554662	Arhgap24
ENSMUSG00000027339	1125.43	0.428115	0.152169	2.81341	0.00490187	0.0555156	Rassf2
ENSMUSG00000032268	52.6004	-1.04535	0.371563	-2.81337	0.00490249	0.0555156	Tmprss5
ENSMUSG00000031824	544.276	-0.564723	0.200765	-2.81286	0.00491028	0.0555666	6430548M08Rik
ENSMUSG00000025260	3914.05	0.232996	0.0828395	2.81261	0.00491405	0.0555721	Hsd17b10
ENSMUSG00000023143	787.033	-0.342534	0.121797	-2.81234	0.00491832	0.0555832	Nagpa
ENSMUSG00000112397	225.397	0.63406	0.225501	2.81178	0.00492676	0.0556415	Gm10824
ENSMUSG00000014606	3628.88	0.210891	0.0750609	2.80959	0.00496046	0.0559847	Slc25a11
ENSMUSG00000063600	42.5115	1.07407	0.382319	2.80936	0.00496399	0.0559872	Egfem1
ENSMUSG00000045545	250.226	0.549779	0.195745	2.80864	0.00497506	0.0560746	Krt14
ENSMUSG00000045996	408.008	0.551812	0.196519	2.80793	0.00498609	0.0561615	Polr2k
ENSMUSG00000017765	2501.07	-0.341738	0.121804	-2.80564	0.00502174	0.0565254	Slc12a4
ENSMUSG00000036106	2936.37	0.25851	0.0921515	2.80527	0.00502749	0.0565526	Prr5
ENSMUSG00000030759	3509.52	0.189432	0.0675436	2.80459	0.005038	0.0566331	Far1
ENSMUSG00000003184	2321.31	-0.241543	0.0861361	-2.80421	0.00504406	0.0566636	Irf3
ENSMUSG00000039246	531.443	0.315686	0.112631	2.80283	0.00506567	0.0568658	Lyplal1
ENSMUSG00000094483	7343.88	0.320716	0.114434	2.80263	0.00506878	0.0568658	Purb
ENSMUSG00000040859	2365.41	-0.225566	0.0805173	-2.80145	0.0050873	0.0570358	Bsdc1
ENSMUSG00000028360	84.3982	0.736643	0.263039	2.80051	0.00510216	0.0571644	Slc44a5
ENSMUSG00000005779	9221.61	0.328039	0.117145	2.80029	0.0051057	0.0571663	Psmb4
ENSMUSG00000008384	643.708	0.305501	0.109161	2.79862	0.00513211	0.057424	Sertad1
ENSMUSG00000035637	3731.26	0.257833	0.0922083	2.79621	0.00517065	0.0577934	Grhpr
ENSMUSG00000037474	3390.92	0.290294	0.10382	2.79612	0.00517196	0.0577934	Dtl
ENSMUSG00000041481	689.625	-0.419304	0.150005	-2.79526	0.00518573	0.057909	Serpina3g
ENSMUSG00000001289	4655.75	0.272307	0.0974268	2.79499	0.00519019	0.0579207	Pfdn5
ENSMUSG00000025255	1666.88	0.346646	0.124136	2.79247	0.00523075	0.0583348	Zfhx4
ENSMUSG00000032666	2581.74	-0.250883	0.0898847	-2.79116	0.00525193	0.0584939	1700025G04Rik
ENSMUSG00000071497	62.1388	-1.01946	0.365241	-2.79119	0.0052514	0.0584939	Nutf2-ps1
ENSMUSG00000002748	16739.3	-0.243326	0.0872405	-2.78914	0.00528478	0.0587437	Baz1b
ENSMUSG00000005804	1778.14	0.212846	0.0763018	2.78953	0.00527846	0.0587437	Bloc1s6
ENSMUSG00000042447	2145.88	0.293177	0.105107	2.78933	0.00528167	0.0587437	Mios
ENSMUSG00000013787	12839.4	-0.169413	0.0607608	-2.78819	0.0053003	0.0588274	Ehmt2
ENSMUSG00000024413	2341.1	-0.289832	0.103949	-2.78821	0.00530008	0.0588274	Npc1
ENSMUSG00000034723	2928.54	0.176853	0.0634325	2.78804	0.00530274	0.0588274	Tmx4
ENSMUSG00000027936	1698.3	-0.272962	0.0979339	-2.7872	0.0053165	0.0589414	Crtc2
ENSMUSG00000085217	49.8035	0.871676	0.312786	2.78682	0.00532285	0.0589731	6030471H07Rik
ENSMUSG00000024177	1515.09	0.233321	0.0837554	2.78574	0.0053406	0.0591311	Nme4
ENSMUSG00000041329	12314.6	-0.346626	0.124458	-2.7851	0.0053512	0.0592097	Atp1b2
ENSMUSG00000038174	803.44	0.361815	0.129936	2.78457	0.00535991	0.0592669	Hycc2
ENSMUSG00000059895	4343.3	0.337481	0.121206	2.78436	0.00536338	0.0592669	Ptp4a3
ENSMUSG00000003534	7058.25	-0.311359	0.111864	-2.78336	0.00537995	0.0593725	Ddr1
ENSMUSG00000114133	106.349	0.619879	0.222695	2.78353	0.00537711	0.0593725	Btf3l4b
ENSMUSG00000030450	161.285	0.87959	0.316125	2.78241	0.00539563	0.0594467	Oca2
ENSMUSG00000036745	319.634	0.45652	0.164065	2.78256	0.0053932	0.0594467	Ttll7
ENSMUSG00000037012	5307.02	-0.322064	0.115754	-2.78232	0.00539722	0.0594467	Hk1
ENSMUSG00000004892	138.747	-0.795962	0.286214	-2.78101	0.00541908	0.0594587	Bcan
ENSMUSG00000019917	2576.44	0.26349	0.0947289	2.78152	0.00541056	0.0594587	Septin10
ENSMUSG00000029503	73.3014	-0.862185	0.309987	-2.78136	0.0054132	0.0594587	P2rx2
ENSMUSG00000051154	2110.15	0.387271	0.139257	2.78099	0.00541939	0.0594587	Commd3
ENSMUSG00000058600	11614.1	0.389502	0.140039	2.78139	0.00541271	0.0594587	Rpl30
ENSMUSG00000078184	32.9422	1.21226	0.435743	2.78204	0.00540183	0.0594587	Rbm8a2
ENSMUSG00000029390	3349.44	0.334015	0.120178	2.77935	0.00544683	0.0597166	Tmed2
ENSMUSG00000033909	2504.04	-0.316537	0.113897	-2.77916	0.00544996	0.0597166	Usp36
ENSMUSG00000022311	57.0627	0.79246	0.285249	2.77814	0.00546717	0.0598544	Csmd3
ENSMUSG00000039670	176.12	0.479391	0.172568	2.77799	0.00546961	0.0598544	Oxld1
ENSMUSG00000095041	4346.58	-0.571897	0.205904	-2.7775	0.00547786	0.0599059
ENSMUSG00000036264	390.371	-0.570524	0.205461	-2.7768	0.00548971	0.0599967	Fstl4
ENSMUSG00000001029	655.008	0.506097	0.182277	2.77652	0.00549437	0.0600089	Icam2
ENSMUSG00000053950	3066.65	0.210704	0.0759023	2.77598	0.0055035	0.0600698	Adnp2
ENSMUSG00000024942	867.659	-0.2964	0.106894	-2.77284	0.00555701	0.0606148	Capn1
ENSMUSG00000039096	544.689	0.279754	0.100916	2.77215	0.00556879	0.0607041	Rsad1
ENSMUSG00000034566	5356.06	0.290513	0.104807	2.77188	0.00557335	0.0607116	Atp5h
ENSMUSG00000048232	2154.36	-0.225802	0.0814673	-2.77169	0.00557665	0.0607116	Fbxo10
ENSMUSG00000052316	24.9319	-1.29094	0.46585	-2.77115	0.00558594	0.0607736	Lrrc15
ENSMUSG00000052151	781.374	0.336131	0.121307	2.77091	0.00558991	0.0607777	Plpp2
ENSMUSG00000021702	246.907	-1.15854	0.418374	-2.76914	0.00562042	0.0610702	Thbs4
ENSMUSG00000022754	624.605	0.42072	0.151955	2.76871	0.00562787	0.0611119	Tmem45a
ENSMUSG00000022212	14.8506	-1.72901	0.624738	-2.76758	0.00564743	0.0612849	Cpne6
ENSMUSG00000020589	739.247	0.282142	0.101989	2.7664	0.00566785	0.0614671	Cyria
ENSMUSG00000022829	75.6919	-0.92296	0.333675	-2.76604	0.00567412	0.0614957	Stxbp5l
ENSMUSG00000007892	33270.4	0.425835	0.154098	2.76341	0.00572008	0.0619542	Rplp1
ENSMUSG00000017446	1306.06	0.24479	0.0886115	2.76251	0.00573593	0.0620515	C1qtnf1
ENSMUSG00000048047	1986.1	0.293041	0.106079	2.76248	0.00573641	0.0620515	Zbtb33
ENSMUSG00000001467	6996.58	0.528833	0.191457	2.76216	0.00574212	0.0620736	Cyp51
ENSMUSG00000030519	146.539	-0.547641	0.198292	-2.76179	0.00574846	0.0621025	Apba2
ENSMUSG00000026737	1610	-0.399226	0.144567	-2.76153	0.00575315	0.0621135	Pip4k2a
ENSMUSG00000026308	83.5725	-0.66717	0.241614	-2.7613	0.00575713	0.0621168	Klhl30
ENSMUSG00000103906	402.09	0.387666	0.140421	2.76075	0.00576694	0.062183	Tigd5
ENSMUSG00000014426	4370.92	-0.287628	0.104204	-2.76025	0.00577572	0.062238	Map3k4
ENSMUSG00000020744	547.705	-0.278981	0.101098	-2.75952	0.00578857	0.0622971	Slc25a19
ENSMUSG00000027078	1047.4	-0.326595	0.11835	-2.75957	0.00578775	0.0622971	Ube2l6
ENSMUSG00000000901	5315.58	-0.320335	0.116107	-2.75896	0.0057985	0.0623629	Mmp11
ENSMUSG00000029166	1015.1	-0.410094	0.148652	-2.75876	0.00580206	0.0623629	Mapre3
ENSMUSG00000024807	2618.34	-0.294949	0.106936	-2.75818	0.00581233	0.0623914	Syvn1
ENSMUSG00000039680	934.874	-0.344952	0.125074	-2.75799	0.00581577	0.0623914	Mrps6
ENSMUSG00000062312	5971.55	-0.350083	0.126933	-2.75801	0.00581549	0.0623914	Erbb2
ENSMUSG00000020132	1861.82	0.244757	0.0887725	2.75713	0.00583111	0.0625162	Rab21
ENSMUSG00000035004	50.0888	-1.15697	0.419774	-2.75617	0.00584823	0.0626219	Igsf6
ENSMUSG00000044139	55.9551	-0.875899	0.317796	-2.75616	0.00584836	0.0626219	Prss53
ENSMUSG00000024766	538.322	0.332363	0.120599	2.75593	0.00585252	0.0626267	Lipo3
ENSMUSG00000000693	1546.57	-0.432505	0.156953	-2.75564	0.00585774	0.062643	Loxl3
ENSMUSG00000047747	987.401	-0.418439	0.151887	-2.75495	0.00587018	0.0626967	Rnf150
ENSMUSG00000069300	17.9048	1.43511	0.520964	2.75471	0.00587438	0.0627021	H2bc11
ENSMUSG00000024472	6329.61	0.249785	0.0907129	2.75358	0.00589471	0.0628793	Dcp2
ENSMUSG00000030982	3224.52	-0.190343	0.0691363	-2.75316	0.00590234	0.0628845	Vps35l
ENSMUSG00000071302	827.484	0.236792	0.0860079	2.75314	0.00590262	0.0628845	2610044O15Rik8
ENSMUSG00000028719	3018.87	0.344029	0.125006	2.7521	0.00592152	0.0630461	Cmpk1
ENSMUSG00000037321	144.29	0.508904	0.184985	2.75106	0.00594029	0.0632062	Tap1
ENSMUSG00000031543	708.515	-0.569511	0.207073	-2.75029	0.00595417	0.0632743	Ank1
ENSMUSG00000031594	34.8934	0.897682	0.326387	2.75036	0.00595297	0.0632743	Fgl1
ENSMUSG00000029005	93.6455	0.612346	0.222785	2.7486	0.00598502	0.0635622	Draxin
ENSMUSG00000022512	240.381	1.0895	0.396443	2.74819	0.00599261	0.0636028	Cldn1
ENSMUSG00000021130	615.458	-0.481505	0.175266	-2.74728	0.00600923	0.063739	Galnt16
ENSMUSG00000063564	2124.78	-0.578435	0.210564	-2.74707	0.00601297	0.063739	Col23a1
ENSMUSG00000023921	3125.13	0.21275	0.0774713	2.74617	0.00602947	0.0638739	Mmut
ENSMUSG00000047187	7124.2	0.217802	0.0793443	2.74503	0.00605055	0.0640368	Rab2a
ENSMUSG00000078813	669.248	-0.300627	0.109521	-2.74493	0.00605242	0.0640368	Leng1
ENSMUSG00000028557	2754.46	0.220637	0.0804202	2.74356	0.00607775	0.0642646	Rnf11
ENSMUSG00000030399	12.0102	-1.702	0.620525	-2.74284	0.00609103	0.0643246	Ckm
ENSMUSG00000067873	5389.48	-0.24692	0.0900194	-2.74297	0.00608867	0.0643246	Htatsf1
ENSMUSG00000014782	326.864	-0.45576	0.166197	-2.74229	0.00610119	0.0643918	Plekhg4
ENSMUSG00000063383	129.941	0.518575	0.189136	2.74181	0.00611018	0.0644464	Zfp947
ENSMUSG00000030105	3674.96	0.254479	0.0928217	2.74159	0.00611422	0.0644488	Arl8b
ENSMUSG00000043207	2040.62	0.207352	0.0756898	2.7395	0.00615325	0.0648198	Zmpste24
ENSMUSG00000040940	5260.61	-0.25878	0.0944792	-2.73901	0.00616236	0.0648754	Arhgef1
ENSMUSG00000063060	1334.5	0.499859	0.182568	2.73793	0.00618267	0.0650488	Sox7
ENSMUSG00000049230	641.267	-0.330162	0.120709	-2.7352	0.00623431	0.0655513	Myef2l
ENSMUSG00000067336	7283.24	0.36458	0.133318	2.73467	0.00624427	0.0656153	Bmpr2
ENSMUSG00000000171	4314.26	0.29073	0.106361	2.73343	0.00626781	0.0657809	Sdhd
ENSMUSG00000004994	467.681	-0.284859	0.104209	-2.73353	0.00626586	0.0657809	Ccdc130
ENSMUSG00000042790	1792.15	-0.214168	0.0783671	-2.73288	0.00627829	0.06585	Rnf214
ENSMUSG00000042870	647.695	-0.25996	0.0951761	-2.73136	0.00630734	0.0661137	Tom1
ENSMUSG00000025068	1429.8	0.256902	0.0940717	2.73092	0.00631573	0.0661607	Gsto1
ENSMUSG00000022978	1005.76	0.302764	0.110893	2.73024	0.00632882	0.0662324	Mis18a
ENSMUSG00000049676	55.835	-0.804082	0.294519	-2.73016	0.0063304	0.0662324	Catsperg1
ENSMUSG00000024104	4442.69	-0.236615	0.0866795	-2.72977	0.00633787	0.0662695	Washc2
ENSMUSG00000034584	138.13	0.553609	0.202848	2.72918	0.00634925	0.0663475	Exph5
ENSMUSG00000057506	853.361	0.31255	0.114585	2.72768	0.00637822	0.0666091	Bloc1s2
ENSMUSG00000021226	722.192	0.31355	0.115006	2.72637	0.00640351	0.0666112	Acot2
ENSMUSG00000040455	1082.77	0.27443	0.100631	2.72709	0.00638956	0.0666112	Usp45
ENSMUSG00000042595	761.759	0.43216	0.15851	2.72639	0.00640305	0.0666112	Fam199x
ENSMUSG00000048930	2505.08	-0.239949	0.0880128	-2.7263	0.00640488	0.0666112	Tada3
ENSMUSG00000074505	2193.42	-0.822806	0.301809	-2.72624	0.00640598	0.0666112	Fat3
ENSMUSG00000074794	4499.18	0.372033	0.136411	2.7273	0.0063855	0.0666112	Arrdc3
ENSMUSG00000093445	9.70658	-1.97669	0.72495	-2.72666	0.00639798	0.0666112	Lrch4
ENSMUSG00000046470	1739.98	0.451681	0.165703	2.72585	0.00641366	0.06665	Sox18
ENSMUSG00000019818	16749.6	0.268937	0.0987028	2.72471	0.00643574	0.0668266	Cd164
ENSMUSG00000022091	5920.98	-0.304409	0.111727	-2.72457	0.00643855	0.0668266	Sorbs3
ENSMUSG00000016833	1266.55	0.436586	0.160254	2.72433	0.00644317	0.0668336	Mrps18c
ENSMUSG00000021055	282.822	0.588218	0.215959	2.72375	0.00645457	0.0669108	Esr2
ENSMUSG00000008855	5556.3	-0.18456	0.0677902	-2.72252	0.00647863	0.0670781	Hdac5
ENSMUSG00000029405	4676.06	0.207256	0.076122	2.72269	0.00647536	0.0670781	G3bp2
ENSMUSG00000040097	2388.72	-0.232153	0.0853099	-2.72129	0.00650277	0.0672868	Flywch1
ENSMUSG00000020863	8444.75	-0.265248	0.0975025	-2.72042	0.00651995	0.0673891	Luc7l3
ENSMUSG00000022940	1065.75	0.296183	0.108876	2.72038	0.00652063	0.0673891	Pigp
ENSMUSG00000018774	97.4439	-0.702944	0.258474	-2.71959	0.00653629	0.0674259	Cd68
ENSMUSG00000032060	280.962	0.614871	0.226115	2.71928	0.00654232	0.0674259	Cryab
ENSMUSG00000034168	7099	0.199537	0.0733809	2.71919	0.00654411	0.0674259	Irf2bpl
ENSMUSG00000038763	92.4677	-0.648107	0.238323	-2.71945	0.00653903	0.0674259	Alpk3
ENSMUSG00000071691	48.2619	-0.775663	0.28519	-2.71981	0.00653203	0.0674259	Gm960
ENSMUSG00000067928	1206.19	0.304474	0.112015	2.71814	0.00656496	0.0675995	Zfp760
ENSMUSG00000033739	395.536	0.305522	0.112443	2.71714	0.00658497	0.0677111	Fkbpl
ENSMUSG00000037349	452.483	0.341723	0.125771	2.71703	0.00658714	0.0677111	Nudt22
ENSMUSG00000038593	802.381	-0.296467	0.109116	-2.71699	0.00658781	0.0677111	Tctn1
ENSMUSG00000006360	329.477	0.409347	0.150686	2.71656	0.00659638	0.0677581	Crip1
ENSMUSG00000028133	176.284	0.566195	0.208465	2.71601	0.00660731	0.0678292	Rwdd3
ENSMUSG00000001666	500.931	0.410516	0.151173	2.71554	0.00661677	0.0678421	Ddt
ENSMUSG00000005045	310.735	-0.548286	0.201908	-2.71553	0.00661701	0.0678421	Chd5
ENSMUSG00000040260	4642.45	-0.550102	0.20259	-2.71535	0.0066206	0.0678421	Daam2
ENSMUSG00000026939	347.37	0.482596	0.17783	2.71381	0.00665144	0.0678666	Tmem141
ENSMUSG00000028264	106.513	0.667784	0.246016	2.71439	0.00663986	0.0678666	Spaca1
ENSMUSG00000038718	1663.35	0.267574	0.0986082	2.71351	0.00665747	0.0678666	Pbx3
ENSMUSG00000041164	4495.3	-0.276268	0.101756	-2.71501	0.00662744	0.0678666	Zmiz2
ENSMUSG00000051579	3471.38	0.261949	0.0965136	2.71411	0.00664533	0.0678666	Tceal8
ENSMUSG00000052794	751.879	-0.252112	0.0928954	-2.71393	0.00664906	0.0678666	1700030K09Rik
ENSMUSG00000057181	1320.29	0.221298	0.0815564	2.71343	0.00665909	0.0678666	5730455P16Rik
ENSMUSG00000061244	2560.24	0.191754	0.0706627	2.71365	0.00665463	0.0678666	Exoc5
ENSMUSG00000068522	11526.6	-0.218118	0.0803728	-2.71383	0.0066511	0.0678666	Aard
ENSMUSG00000075286	28.2056	1.16097	0.427935	2.71296	0.0066686	0.0679225	Gm1968
ENSMUSG00000041479	192.401	0.680997	0.251074	2.71234	0.00668101	0.0679672	Syt15
ENSMUSG00000060261	24234.7	-0.190496	0.0702326	-2.71236	0.00668066	0.0679672	Gtf2i
ENSMUSG00000029221	4085.74	0.19557	0.0721162	2.71188	0.00669036	0.0679805	Slc30a9
ENSMUSG00000051786	2246.06	-0.256723	0.0946624	-2.71199	0.00668808	0.0679805	Tubgcp6
ENSMUSG00000049411	578.941	0.309255	0.114071	2.71108	0.00670641	0.0681027	Tmem241
ENSMUSG00000035686	29.8241	1.22455	0.451769	2.71056	0.00671691	0.0681684	Thrsp
ENSMUSG00000021936	2259.94	0.288686	0.106547	2.70948	0.0067388	0.0683495	Mapk8
ENSMUSG00000024953	2741.39	0.193622	0.0714795	2.70877	0.00675328	0.0684554	Prdx5
ENSMUSG00000070407	1620.35	0.355354	0.131234	2.70779	0.00677337	0.0686179	Hs3st3b1
ENSMUSG00000035202	21559.3	1.72242	0.636269	2.70705	0.00678832	0.0687282	Lars2
ENSMUSG00000036687	6504.16	-0.317138	0.117174	-2.70654	0.00679879	0.068793	Tmem184a
ENSMUSG00000002833	5007.18	-0.286744	0.105998	-2.70518	0.0068268	0.0690352	Hdgfl2
ENSMUSG00000034675	10206.3	-0.213882	0.0790973	-2.70404	0.00685028	0.0692312	Dbn1
ENSMUSG00000053007	265.542	0.55901	0.206756	2.70372	0.00685675	0.0692552	Creb5
ENSMUSG00000034872	49.871	-1.00421	0.37146	-2.7034	0.00686343	0.0692813	Gipc3
ENSMUSG00000061894	790.389	-0.233886	0.0865569	-2.70211	0.00689008	0.0695089	Zscan20
ENSMUSG00000028270	192.294	0.652811	0.241626	2.70174	0.00689768	0.069544	Gbp2
ENSMUSG00000030350	139.306	0.959223	0.355239	2.70022	0.00692934	0.0698216	Prmt8
ENSMUSG00000021376	466.897	0.407106	0.150851	2.69874	0.00696036	0.0700925	Tpmt
ENSMUSG00000001999	624.037	0.287691	0.10664	2.69779	0.00698023	0.0702095	Blvra
ENSMUSG00000032187	21765.9	-0.273133	0.101243	-2.69778	0.00698028	0.0702095	Smarca4
ENSMUSG00000028172	797.461	-0.414014	0.153573	-2.69587	0.00702046	0.0705717	Tacr3
ENSMUSG00000027447	7714.96	0.179275	0.0665074	2.69557	0.00702685	0.070594	Cst3
ENSMUSG00000046532	328.533	0.744586	0.276328	2.69457	0.00704794	0.0707638	Ar
ENSMUSG00000059423	790.32	0.314997	0.11691	2.69437	0.00705223	0.0707649	Zfp933
ENSMUSG00000015656	70003.6	-0.420291	0.156031	-2.69364	0.00706761	0.0708772	Hspa8
ENSMUSG00000055963	321.159	0.433578	0.160976	2.69343	0.00707215	0.0708807	Triqk
ENSMUSG00000036186	350.797	0.414407	0.153879	2.69307	0.00707985	0.0708841	Dipk1b
ENSMUSG00000042485	44.6247	-1.07313	0.398486	-2.69302	0.00708087	0.0708841	Mustn1
ENSMUSG00000027678	3129.29	-0.23654	0.0878858	-2.69144	0.00711435	0.0711771	Ncoa3
ENSMUSG00000020453	5233.06	-0.195968	0.0728239	-2.69099	0.0071241	0.0712326	Patz1
ENSMUSG00000028228	2826.09	0.1987	0.0738573	2.69033	0.0071382	0.0713314	Cpne3
ENSMUSG00000079316	1451.25	0.31187	0.115943	2.68987	0.00714805	0.0713455	Rab9
ENSMUSG00000050423	34.1878	1.43946	0.535271	2.68921	0.00716205	0.0714431	Ppp1r3g
ENSMUSG00000046079	1980.1	-0.245836	0.0914612	-2.68788	0.00719083	0.0716879	Lrrc8d
ENSMUSG00000031853	2530.9	-0.431802	0.160689	-2.68719	0.00720554	0.071713	Map3k21
ENSMUSG00000034993	8425.9	-0.22975	0.0854989	-2.68717	0.00720606	0.071713	Vat1
ENSMUSG00000093930	16149.5	0.524132	0.195031	2.68743	0.00720036	0.071713	Hmgcs1
ENSMUSG00000041362	721.482	-0.503264	0.187354	-2.68617	0.00722773	0.0718863	Shtn1
ENSMUSG00000035547	695.208	-0.3303	0.122984	-2.68571	0.00723753	0.0719415	Capn5
ENSMUSG00000089809	2072.69	-0.297294	0.110728	-2.68491	0.00725486	0.0720714	Rasgef1b
ENSMUSG00000070738	5757.24	-0.299252	0.111558	-2.68249	0.00730771	0.0725539	Dgkd
ENSMUSG00000038323	478.052	0.301906	0.11256	2.68219	0.00731419	0.0725757	1700066M21Rik
ENSMUSG00000034501	981.241	0.270622	0.101	2.67942	0.00737506	0.0731367	Pcnx4
ENSMUSG00000025531	1563.35	0.292788	0.109293	2.67893	0.00738585	0.0731755	Chm
ENSMUSG00000049313	1057.08	-0.414229	0.154629	-2.67885	0.00738762	0.0731755	Sorl1
ENSMUSG00000087403	321.824	0.464511	0.173445	2.67815	0.00740297	0.0732847	Kantr
ENSMUSG00000021576	2083.58	0.252836	0.0944307	2.67748	0.00741777	0.0733882	Pdcd6
ENSMUSG00000027895	83.2868	-0.833331	0.311319	-2.67677	0.00743346	0.0734575	Kcnc4
ENSMUSG00000029512	4554.92	-0.236562	0.0884223	-2.67537	0.00746467	0.0736799	Ulk1
ENSMUSG00000047238	1496.14	0.328135	0.122644	2.67551	0.00746146	0.0736799	Mageh1
ENSMUSG00000032717	6020.17	0.229008	0.0856315	2.67435	0.00748748	0.0738262	Mdfi
ENSMUSG00000041187	1038.08	-0.311354	0.116424	-2.67431	0.00748822	0.0738262	Prkd2
ENSMUSG00000041361	324.029	-0.340999	0.127541	-2.67364	0.00750337	0.0739325	Myzap
ENSMUSG00000003131	7339.46	0.225523	0.0843711	2.67299	0.0075179	0.0739654	Pafah1b2
ENSMUSG00000008348	2324.81	0.39395	0.147374	2.67313	0.00751461	0.0739654	Ubc
ENSMUSG00000017707	30247.1	0.185749	0.0694933	2.6729	0.00751983	0.0739654	Serinc3
ENSMUSG00000037361	2035.84	0.392901	0.147039	2.67209	0.00753811	0.0741012	Sf3b6
ENSMUSG00000073079	397.931	0.472011	0.176658	2.6719	0.00754239	0.0741012	Srp54a
ENSMUSG00000026812	3272.11	-0.172328	0.0645259	-2.67067	0.00756992	0.0742836	Tsc1
ENSMUSG00000031791	1172.38	0.249987	0.0936112	2.67049	0.00757414	0.0742836	Tmem38a
ENSMUSG00000070544	12253.2	-0.219748	0.0822828	-2.67064	0.00757076	0.0742836	Top1
ENSMUSG00000021413	7024.71	-0.212442	0.079596	-2.66901	0.00760751	0.0745677	Prpf4b
ENSMUSG00000021236	2513.36	-0.269863	0.101154	-2.66785	0.00763383	0.0747824	Entpd5
ENSMUSG00000035299	2952.44	-0.412929	0.154856	-2.66654	0.00766372	0.0750317	Mid1
ENSMUSG00000071451	487.51	0.285358	0.107098	2.66446	0.00771123	0.0754532	Psmg4
ENSMUSG00000021003	1039.13	0.237836	0.0893146	2.6629	0.00774699	0.0757155	Galc
ENSMUSG00000044534	12.5446	1.85916	0.698153	2.66297	0.00774533	0.0757155	Ackr2
ENSMUSG00000023013	27.024	1.17827	0.442553	2.66244	0.0077577	0.0757764	Aqp2
ENSMUSG00000087651	497.04	0.437107	0.16421	2.66187	0.00777073	0.0758599	1500009L16Rik
ENSMUSG00000022477	9302.19	-0.258093	0.0969876	-2.66109	0.00778888	0.0759932	Aco2
ENSMUSG00000059734	2796.03	0.216316	0.0812981	2.66078	0.00779594	0.0760183	Ndufs8
ENSMUSG00000041881	3839.82	0.423203	0.15909	2.66015	0.0078107	0.0761183	Ndufa7
ENSMUSG00000051495	3591.13	0.265063	0.0996546	2.65982	0.00781824	0.076148	Irf2bp2
ENSMUSG00000063903	120.026	-0.690466	0.259638	-2.65934	0.00782943	0.076213	Klk1
ENSMUSG00000074607	404.239	-0.376687	0.141673	-2.65884	0.00784093	0.0762811	Tox2
ENSMUSG00000102030	15.6179	1.73927	0.654309	2.65817	0.00785652	0.0763889	Gm29106
ENSMUSG00000035212	3528.28	0.204493	0.0770139	2.65528	0.00792435	0.0770041	Leprot
ENSMUSG00000038702	1249.96	0.309617	0.116644	2.65436	0.0079458	0.0771682	Dsel
ENSMUSG00000069855	53.8343	-1.13559	0.427871	-2.65404	0.00795338	0.0771976	Slc47a2
ENSMUSG00000025470	485.135	-0.326196	0.122935	-2.65339	0.00796866	0.0773015	Zfp511
ENSMUSG00000022840	387.765	-0.460233	0.173464	-2.6532	0.00797338	0.0773029	Adcy5
ENSMUSG00000041696	1312.74	-0.401138	0.15124	-2.65233	0.00799384	0.0774125	Rasl12
ENSMUSG00000073639	6501.25	0.2693	0.101529	2.65245	0.00799094	0.0774125	Rab18
ENSMUSG00000021147	2065.93	0.203323	0.0766863	2.65136	0.00801679	0.0775441	Wdr37
ENSMUSG00000031931	1310.45	0.412781	0.155697	2.65118	0.00802118	0.0775441	Ankrd49
ENSMUSG00000052656	1361.92	0.220256	0.0830694	2.65147	0.00801422	0.0775441	Rnf103
ENSMUSG00000035764	1866.56	0.264925	0.0999383	2.65089	0.00802805	0.0775663	Fbxo45
ENSMUSG00000057672	2557.97	-0.347116	0.130962	-2.6505	0.00803717	0.0776101	Pkn1
ENSMUSG00000031714	5010.85	-0.266811	0.100726	-2.64887	0.00807622	0.0779126	Gab1
ENSMUSG00000097592	44.6	1.06651	0.402638	2.6488	0.00807771	0.0779126	4930500F10Rik
ENSMUSG00000028251	334.289	0.346029	0.130656	2.6484	0.00808735	0.0779611	Tstd3
ENSMUSG00000032902	2223.96	0.388866	0.146904	2.64707	0.00811916	0.0782232	Slc16a1
ENSMUSG00000012640	1312.91	0.217811	0.0822933	2.64676	0.00812668	0.0782511	Zfp715
ENSMUSG00000032575	4859.57	-0.283486	0.10713	-2.64617	0.00814082	0.0783427	Manf
ENSMUSG00000024862	2000.33	-0.331999	0.125509	-2.64522	0.00816382	0.0785194	Klc2
ENSMUSG00000034799	315.129	-0.352634	0.133325	-2.64492	0.0081709	0.0785428	Unc13a
ENSMUSG00000008604	6032.05	-0.210361	0.0795495	-2.6444	0.00818347	0.0785743	Ubqln4
ENSMUSG00000073987	662.737	0.329317	0.124533	2.64441	0.00818331	0.0785743	Ggh
ENSMUSG00000026655	1336.9	0.333954	0.12632	2.64372	0.00820007	0.078689	Fam107b
ENSMUSG00000009927	16102.4	0.332014	0.125629	2.64282	0.00822197	0.0788465	Rps25
ENSMUSG00000043487	160.853	0.463632	0.175441	2.64266	0.0082258	0.0788465	Acot6
ENSMUSG00000025525	1267.6	0.246547	0.0933373	2.64146	0.00825484	0.0790353	Apool
ENSMUSG00000030717	78.5884	0.680521	0.257625	2.64151	0.0082537	0.0790353	Nupr1
ENSMUSG00000015340	60.2635	-0.791013	0.299492	-2.64118	0.00826171	0.0790563	Cybb
ENSMUSG00000099689	1181.55	0.26954	0.102066	2.64084	0.00827013	0.0790921	Zfp383
ENSMUSG00000009418	8013.03	-0.383986	0.145438	-2.6402	0.00828571	0.0791964	Nav1
ENSMUSG00000039835	2173.69	-0.235476	0.0892026	-2.63979	0.00829585	0.0792485	Nhsl1
ENSMUSG00000039137	1408.35	-0.274952	0.104166	-2.63956	0.00830141	0.0792569	Whrn
ENSMUSG00000024526	10.5587	-1.49317	0.565827	-2.63892	0.00831699	0.0793161	Cidea
ENSMUSG00000032316	2378.04	-0.200635	0.0760263	-2.63902	0.00831465	0.0793161	Clk3
ENSMUSG00000024921	7104.35	-0.195574	0.0741345	-2.6381	0.00833715	0.0794636	Smarca2
ENSMUSG00000020023	1160.57	-0.28254	0.107115	-2.63772	0.0083465	0.0794931	Tmcc3
ENSMUSG00000025862	8571.59	0.185086	0.0701724	2.63759	0.00834965	0.0794931	Stag2
ENSMUSG00000046861	1288.66	-0.278741	0.105734	-2.63626	0.00838261	0.0797172	Hectd3
ENSMUSG00000060143	2379.78	0.389054	0.147572	2.63637	0.00837975	0.0797172	Gm10076
ENSMUSG00000058932	28.8319	1.72422	0.654183	2.63568	0.00839689	0.0798082	Gm2174
ENSMUSG00000006705	2115.26	-0.19889	0.0754757	-2.63516	0.00840981	0.0798697	Pknox1
ENSMUSG00000020460	24754.3	0.298301	0.113206	2.63502	0.00841322	0.0798697	Rps27a
ENSMUSG00000031197	2239.5	0.388885	0.147593	2.63485	0.00841753	0.0798697	Vbp1
ENSMUSG00000057497	2833.21	0.325831	0.123699	2.63406	0.00843699	0.0800049	Fam136a
ENSMUSG00000063524	33046.4	0.309496	0.117505	2.63389	0.00844123	0.0800049	Eno1
ENSMUSG00000001909	2990.65	-0.256119	0.0972566	-2.63343	0.00845272	0.0800241	Trmt1
ENSMUSG00000022914	4325.05	0.454207	0.172473	2.6335	0.00845103	0.0800241	Brwd1
ENSMUSG00000020994	7471.84	-0.30842	0.117126	-2.63323	0.00845778	0.0800273	Pnn
ENSMUSG00000113061	237.676	0.716043	0.271975	2.63275	0.00846963	0.0800946	Rps18-ps5
ENSMUSG00000022280	6092.56	0.197714	0.0751205	2.63195	0.00848953	0.0802379	Rnf19a
ENSMUSG00000001964	2813.8	0.29103	0.110593	2.63155	0.00849968	0.080289	Emd
ENSMUSG00000025955	10442.1	0.260987	0.0992103	2.63065	0.00852222	0.080457	Akr1cl
ENSMUSG00000030245	3044.99	0.257661	0.0979767	2.62982	0.00854313	0.0806094	Golt1b
ENSMUSG00000040797	18.5099	1.19487	0.454492	2.62904	0.00856275	0.0807495	Iqsec3
ENSMUSG00000019578	2982.72	-0.171208	0.0651646	-2.62732	0.00860599	0.0808898	Ubxn6
ENSMUSG00000023827	2698.72	-0.271232	0.103232	-2.62739	0.00860415	0.0808898	Agpat4
ENSMUSG00000024426	1519.73	-0.334128	0.127162	-2.62757	0.0085997	0.0808898	Atat1
ENSMUSG00000075307	36.4084	-1.975	0.751658	-2.62753	0.00860075	0.0808898	Klhl41
ENSMUSG00000105161	80.6971	0.635007	0.241687	2.6274	0.0086041	0.0808898	Gm42595
ENSMUSG00000112639	104.392	0.675997	0.257296	2.62731	0.00860631	0.0808898	A730063M14Rik
ENSMUSG00000028691	17338.4	0.419827	0.159836	2.62661	0.00862394	0.0810104	Prdx1
ENSMUSG00000026834	325.405	0.808356	0.307779	2.62641	0.00862896	0.0810126	Acvr1c
ENSMUSG00000018770	11574	0.328872	0.125247	2.6258	0.00864467	0.08105	Atp5g3
ENSMUSG00000020818	1017.26	-0.219134	0.0834761	-2.62511	0.00866215	0.08105	Mfsd11
ENSMUSG00000021701	2660.21	0.467763	0.178142	2.62578	0.008645	0.08105	Plk2
ENSMUSG00000042293	470.857	0.333479	0.127012	2.62557	0.00865043	0.08105	Gm5617
ENSMUSG00000044600	4246.08	0.196601	0.0748884	2.62525	0.00865845	0.08105	Smim7
ENSMUSG00000045994	40.7342	0.934979	0.356193	2.62493	0.00866679	0.08105	B3gat1
ENSMUSG00000049764	2482.78	0.332419	0.126648	2.62475	0.00867127	0.08105	Zfp280b
ENSMUSG00000070000	1180.79	0.222751	0.0848642	2.62479	0.00867027	0.08105	Fcho1
ENSMUSG00000027852	6168.68	0.17674	0.0673503	2.6242	0.00868539	0.0811372	Nras
ENSMUSG00000024944	1240.88	0.251218	0.0958	2.62232	0.00873346	0.0815412	Arl2
ENSMUSG00000059326	1425.13	-0.448365	0.171201	-2.61894	0.00882023	0.0823059	Csf2ra
ENSMUSG00000027695	983.518	0.322985	0.123383	2.61775	0.00885129	0.0824213	Pld1
ENSMUSG00000030406	25.7675	-1.15882	0.44261	-2.61815	0.00884079	0.0824213	Gipr
ENSMUSG00000034765	547.687	0.503821	0.192464	2.61774	0.00885142	0.0824213	Dusp5
ENSMUSG00000074676	1083.15	0.300014	0.114609	2.61771	0.00885208	0.0824213	Foxs1
ENSMUSG00000014778	2184.04	-0.343487	0.131254	-2.61697	0.00887137	0.0825101	Fhod1
ENSMUSG00000027006	6371.52	0.239679	0.0915836	2.61705	0.00886931	0.0825101	Dnajc10
ENSMUSG00000057789	1985.84	0.225945	0.0863524	2.61654	0.0088825	0.0825246	Bak1
ENSMUSG00000079654	197.941	0.568022	0.217089	2.61654	0.00888269	0.0825246	Prrt4
ENSMUSG00000025894	1575.14	0.305077	0.116618	2.61603	0.00889583	0.082556	Aasdhppt
ENSMUSG00000032186	399.451	-0.517753	0.197904	-2.61618	0.00889209	0.082556	Tmod2
ENSMUSG00000028736	12.8882	-2.86092	1.09388	-2.61539	0.00891266	0.0826669	Pax7
ENSMUSG00000022946	1198.58	-0.34734	0.132835	-2.61483	0.00892713	0.0827454	Dop1b
ENSMUSG00000023074	686.98	0.266373	0.101879	2.61461	0.00893297	0.0827454	Mospd1
ENSMUSG00000028756	4005.75	-0.237723	0.0909249	-2.6145	0.0089358	0.0827454	Pink1
ENSMUSG00000032298	371.14	-0.383419	0.146663	-2.61429	0.0089413	0.0827511	Neil1
ENSMUSG00000029673	3424.91	-0.252654	0.0966619	-2.61379	0.00895434	0.0828264	Auts2
ENSMUSG00000042303	1127.76	-0.348135	0.133247	-2.61271	0.00898274	0.0830437	Sgsm3
ENSMUSG00000031245	2239.41	-0.31428	0.120315	-2.61214	0.00899775	0.083137	Hmgn5
ENSMUSG00000056296	34.1709	0.828034	0.317079	2.61144	0.00901614	0.0832161	Synpr
ENSMUSG00000062373	2160.32	0.248217	0.0950455	2.61156	0.00901305	0.0832161	Tmem65
ENSMUSG00000036591	4211.6	-0.261101	0.100026	-2.61033	0.00904547	0.0834413	Arhgap21
ENSMUSG00000028863	1638.07	-0.2227	0.0853528	-2.60917	0.0090763	0.0835889	Meaf6
ENSMUSG00000039218	31420	-0.277002	0.106161	-2.60928	0.00907339	0.0835889	Srrm2
ENSMUSG00000075376	1987.26	0.3888	0.148993	2.60952	0.00906685	0.0835889	Rc3h2
ENSMUSG00000085402	28.1776	1.09217	0.418656	2.60875	0.00908736	0.0836452	Gm12111
ENSMUSG00000026393	2683.94	0.198676	0.0761669	2.60842	0.00909607	0.0836799	Nek7
ENSMUSG00000026977	4279.26	0.211511	0.081119	2.60741	0.00912296	0.0838361	Marchf7
ENSMUSG00000049929	841.734	0.285107	0.109344	2.60743	0.00912247	0.0838361	Lpar4
ENSMUSG00000059173	1290.52	0.247455	0.0949627	2.60582	0.0091655	0.0841356	Pde1a
ENSMUSG00000074890	645.097	0.35927	0.137869	2.60588	0.00916386	0.0841356	Lcmt2
ENSMUSG00000031527	2352.47	0.230502	0.0884746	2.60529	0.00917963	0.08419	Eri1
ENSMUSG00000033491	16300.4	0.300205	0.115234	2.60517	0.00918287	0.08419	Prss35
ENSMUSG00000053477	7454.83	0.284505	0.109213	2.60504	0.00918635	0.08419	Tcf4
ENSMUSG00000023953	1204.59	0.216084	0.083019	2.60283	0.00924575	0.0846283	Polh
ENSMUSG00000032602	1336.79	0.210764	0.080979	2.6027	0.00924919	0.0846283	Slc25a20
ENSMUSG00000110823	41.0675	-1.06184	0.407927	-2.60301	0.00924097	0.0846283	Gm36799
ENSMUSG00000021485	707.781	0.29601	0.113802	2.60109	0.00929273	0.0849579	Mxd3
ENSMUSG00000039176	4415.79	-0.292996	0.112647	-2.601	0.00929525	0.0849579	Polg
ENSMUSG00000015981	87.7359	-0.585636	0.225209	-2.60041	0.00931116	0.0850289	Stk32c
ENSMUSG00000049436	478.633	0.509744	0.196029	2.60034	0.00931307	0.0850289	Upk1b
ENSMUSG00000024970	2084.57	-0.19214	0.0739181	-2.59936	0.00933981	0.085227	Spindoc
ENSMUSG00000024617	237.466	-0.515709	0.198432	-2.59892	0.00935175	0.0852827	Camk2a
ENSMUSG00000028197	187.545	-0.746295	0.287173	-2.59876	0.009356	0.0852827	Col24a1
ENSMUSG00000054808	16554.4	-0.257307	0.0990251	-2.5984	0.00936598	0.0853278	Actn4
ENSMUSG00000041684	1327.8	0.271658	0.104569	2.59788	0.00938016	0.085365	Bivm
ENSMUSG00000086401	66.2932	-0.670147	0.257957	-2.59791	0.00937942	0.085365	Gm15559
ENSMUSG00000030879	3281.43	0.297395	0.114504	2.59724	0.00939752	0.085477	Mrpl17
ENSMUSG00000022146	60.404	-0.737977	0.28419	-2.59677	0.00941043	0.0855252	Osmr
ENSMUSG00000031729	4998.79	-0.17969	0.0692045	-2.5965	0.00941789	0.0855252	Ist1
ENSMUSG00000038708	6618.47	-0.206494	0.079528	-2.5965	0.00941799	0.0855252	Golga4
ENSMUSG00000038077	714.726	-0.360448	0.138865	-2.59567	0.00944059	0.0856768	Kcna6
ENSMUSG00000063179	704.074	0.334621	0.128923	2.59552	0.00944481	0.0856768	Pstk
ENSMUSG00000041328	2805.25	0.175351	0.0675874	2.59443	0.00947488	0.0859035	Pcf11
ENSMUSG00000031622	13251.7	-0.248812	0.0959126	-2.59415	0.0094824	0.0859257	Sin3b
ENSMUSG00000041992	838.852	0.3582	0.13824	2.59114	0.00956591	0.086636	Rapgef5
ENSMUSG00000021540	9889.79	0.236532	0.0912949	2.59085	0.0095738	0.0866611	Smad5
ENSMUSG00000066440	2305.27	-0.195805	0.0755938	-2.59023	0.00959118	0.0867719	Zfyve26
ENSMUSG00000027803	4280.12	0.2175	0.0839827	2.58981	0.00960277	0.0868304	Wwtr1
ENSMUSG00000023009	4122.05	-0.262454	0.101364	-2.58923	0.00961916	0.0868393	Nckap5l
ENSMUSG00000037196	35.3756	0.847626	0.327322	2.58958	0.00960934	0.0868393	Pacrg
ENSMUSG00000039428	1121.8	0.238569	0.0921331	2.58939	0.00961452	0.0868393	Tmem135
ENSMUSG00000078998	69.886	-0.688595	0.266239	-2.58637	0.00969914	0.0875147	Bpifa6
ENSMUSG00000035954	1883.32	0.398705	0.154174	2.58607	0.00970768	0.0875451	Dock4
ENSMUSG00000028555	416.573	-0.291321	0.112665	-2.58573	0.00971732	0.0875853	Ttc39a
ENSMUSG00000013338	261.235	-0.557518	0.215801	-2.58348	0.00978084	0.088064	Fer1l4
ENSMUSG00000031596	2125.8	0.322399	0.124787	2.58359	0.00977773	0.088064	Slc7a2
ENSMUSG00000032583	401.415	-0.361865	0.140097	-2.58296	0.00979571	0.088151	Mon1a
ENSMUSG00000024246	527.292	0.286924	0.111109	2.58235	0.0098129	0.0882587	Thumpd2
ENSMUSG00000019877	8134.95	0.222172	0.0860543	2.58177	0.00982963	0.0882835	Serinc1
ENSMUSG00000036986	3627.07	-0.344568	0.13347	-2.5816	0.00983423	0.0882835	Pml
ENSMUSG00000038663	8.57132	-1.66395	0.644427	-2.58207	0.00982103	0.0882835	Fsd2
ENSMUSG00000070056	1394.98	-0.303853	0.117703	-2.58152	0.00983653	0.0882835	Mfhas1
ENSMUSG00000025321	1528.96	0.411339	0.159352	2.58133	0.00984209	0.0882866	Itgb8
ENSMUSG00000038871	2264.48	-0.401821	0.155678	-2.58111	0.00984839	0.0882963	Bpgm
ENSMUSG00000029165	1910.88	-0.225478	0.0873764	-2.58054	0.00986471	0.0883958	Agbl5
ENSMUSG00000037428	16.6689	-1.60883	0.623801	-2.57908	0.00990643	0.0886757	Vgf
ENSMUSG00000039155	59.8199	-0.65223	0.252877	-2.57923	0.00990201	0.0886757	Cdh26
ENSMUSG00000022176	63.1982	0.655975	0.254541	2.57709	0.00996362	0.0891404	Rem2
ENSMUSG00000047583	444.792	-0.315774	0.122565	-2.57637	0.00998434	0.0892786	Tyw3
ENSMUSG00000001419	5300.53	-0.196676	0.0763629	-2.57555	0.0100082	0.0894448	Mef2d
ENSMUSG00000033196	21.5698	1.19183	0.462857	2.57493	0.0100259	0.0895557	Myh2
ENSMUSG00000063632	5316.6	0.337143	0.130956	2.57448	0.0100391	0.0896265	Sox11
ENSMUSG00000054074	735.735	0.262324	0.101993	2.57198	0.0101118	0.0902276	Skida1
ENSMUSG00000007872	5966.04	0.568237	0.220954	2.57174	0.0101188	0.0902426	Id3
ENSMUSG00000030967	3145.44	0.202719	0.0788712	2.57026	0.0101622	0.0905648	Zranb1
ENSMUSG00000031835	17845.8	-0.173189	0.0673849	-2.57014	0.0101657	0.0905648	Mbtps1
ENSMUSG00000004473	92.8377	0.554393	0.215759	2.5695	0.0101846	0.0906613	Clec11a
ENSMUSG00000040374	1558.24	0.218195	0.0849262	2.56923	0.0101926	0.0906613	Pex2
ENSMUSG00000045193	3056.62	0.231916	0.0902617	2.56937	0.0101883	0.0906613	Cirbp
ENSMUSG00000038127	5688.87	0.213188	0.0829901	2.56884	0.0102039	0.0907142	Ccdc50
ENSMUSG00000037993	5026.51	-0.232658	0.0905763	-2.56864	0.0102098	0.0907193	Dhx38
ENSMUSG00000038895	527.23	-0.311643	0.121376	-2.56759	0.0102409	0.0909481	Zfp653
ENSMUSG00000030057	19813.8	0.300743	0.117154	2.56708	0.0102558	0.0910327	Cnbp
ENSMUSG00000030533	2131.69	-0.217262	0.0846454	-2.56674	0.0102661	0.091076	Unc45a
ENSMUSG00000020329	2218.01	-0.251011	0.0979193	-2.56344	0.0103639	0.0918958	Polrmt
ENSMUSG00000056749	1326.33	-0.231328	0.0902841	-2.56222	0.0104005	0.0921719	Nfil3
ENSMUSG00000062210	1423.84	0.288181	0.112574	2.55993	0.0104692	0.092732	Tnfaip8
ENSMUSG00000032127	2742.74	-0.223703	0.0874103	-2.55923	0.0104905	0.0928718	Vps11
ENSMUSG00000024330	145.539	-0.506422	0.197943	-2.55842	0.0105149	0.0930249	Col11a2
ENSMUSG00000030660	3719.91	0.194218	0.0759169	2.55829	0.0105188	0.0930249	Pik3c2a
ENSMUSG00000028629	1324.18	0.20063	0.0784459	2.55756	0.0105409	0.0931718	Exo5
ENSMUSG00000027751	3006.83	-0.232378	0.0908693	-2.55727	0.0105497	0.0932006	Supt20
ENSMUSG00000042453	263.61	-0.6349	0.248375	-2.55622	0.0105817	0.0933863	Reln
ENSMUSG00000064302	6285.65	-0.192177	0.0751779	-2.55629	0.0105794	0.0933863	Clasp1
ENSMUSG00000036907	89.8923	-0.769124	0.301022	-2.55504	0.0106175	0.0936529	C1ql2
ENSMUSG00000020590	2237.08	0.166914	0.0653558	2.55393	0.0106514	0.0938948	Snx13
ENSMUSG00000033585	5963.22	0.160209	0.0627385	2.5536	0.0106615	0.0938948	Ndn
ENSMUSG00000041720	3661.32	-0.191125	0.0748432	-2.55367	0.0106593	0.0938948	Pi4ka
ENSMUSG00000054423	855.721	-0.470953	0.184461	-2.55313	0.010676	0.0939731	Cadps
ENSMUSG00000035681	23.3378	-1.05471	0.413203	-2.55253	0.0106944	0.0940866	Kcnc2
ENSMUSG00000051504	8.416	-1.89572	0.743198	-2.55076	0.0107487	0.0944543	Siglech
ENSMUSG00000063362	2214.69	0.26522	0.10399	2.55044	0.0107586	0.0944543	Alg11
ENSMUSG00000068740	691.509	-0.278492	0.109189	-2.55055	0.0107552	0.0944543	Celsr2
ENSMUSG00000097974	48.8043	1.03306	0.404995	2.55079	0.010748	0.0944543	Gm10605
ENSMUSG00000024038	2514.16	0.252641	0.099082	2.54982	0.0107778	0.0945744	Ndufv3
ENSMUSG00000027463	456.261	-0.493863	0.193745	-2.54903	0.0108022	0.0946991	Slc52a3
ENSMUSG00000034663	1833.6	0.312211	0.122484	2.549	0.0108032	0.0946991	Bmp2k
ENSMUSG00000003546	2157.02	-0.201143	0.0789302	-2.54837	0.0108229	0.0947239	Klc4
ENSMUSG00000021957	15167.3	0.211089	0.0828292	2.54848	0.0108193	0.0947239	Tkt
ENSMUSG00000063412	51.4294	0.735642	0.288649	2.54857	0.0108167	0.0947239	Gm10131
ENSMUSG00000039852	8854.7	-0.180017	0.0706504	-2.54799	0.0108345	0.0947762	Rere
ENSMUSG00000041798	50.4959	0.899081	0.352983	2.5471	0.0108623	0.0949712	Gck
ENSMUSG00000027985	739.329	-0.311044	0.122145	-2.54652	0.0108804	0.0950312	Lef1
ENSMUSG00000031150	717.418	-0.239349	0.0939871	-2.54662	0.0108772	0.0950312	Ccdc120
ENSMUSG00000025227	1017.21	-0.294142	0.115555	-2.54548	0.0109129	0.0952656	Mfsd13a
ENSMUSG00000025035	1680.87	0.239254	0.0940268	2.54453	0.0109425	0.0954252	Arl3
ENSMUSG00000027360	690.188	0.561853	0.220806	2.54456	0.0109417	0.0954252	Hdc
ENSMUSG00000036850	1275.89	0.340567	0.133866	2.54409	0.0109563	0.0954966	Mrpl41
ENSMUSG00000029227	6843.74	-0.290698	0.114281	-2.54371	0.0109682	0.0955511	Fip1l1
ENSMUSG00000031189	1130.22	0.390279	0.15344	2.54352	0.0109742	0.0955539	Aff2
ENSMUSG00000024613	6054.23	-0.30599	0.120312	-2.5433	0.0109811	0.0955651	Tcof1
ENSMUSG00000030671	821.401	0.233901	0.0919969	2.54248	0.0110068	0.0956901	Pde3b
ENSMUSG00000044313	361.627	0.420078	0.165223	2.54249	0.0110066	0.0956901	Mab21l3
ENSMUSG00000104435	110.419	-0.730131	0.287194	-2.5423	0.0110127	0.0956923	Gm37422
ENSMUSG00000028212	885.183	0.325065	0.127926	2.54103	0.0110525	0.0959744	Ccne2
ENSMUSG00000034683	19.9527	-1.28815	0.506966	-2.54091	0.0110565	0.0959744	Ppp1r1c
ENSMUSG00000026289	1658.69	-0.200208	0.0788031	-2.54061	0.0110661	0.0960081	Atg16l1
ENSMUSG00000024622	2772.47	-0.24074	0.0948243	-2.5388	0.0111233	0.0964053	Hmgxb3
ENSMUSG00000039787	3742.73	-0.290172	0.114303	-2.53862	0.0111289	0.0964053	Cercam
ENSMUSG00000100600	40.6913	0.907752	0.357546	2.53884	0.011122	0.0964053	A230077H06Rik
ENSMUSG00000034158	12421.9	0.379468	0.149516	2.53797	0.0111496	0.096535	Lrrc58
ENSMUSG00000027102	2526.88	0.240452	0.0947609	2.53746	0.011166	0.0966272	Hoxd8
ENSMUSG00000032267	3988.14	-0.286265	0.112842	-2.53685	0.0111854	0.0967454	Usp28
ENSMUSG00000027357	1487.25	0.28587	0.112711	2.53631	0.0112029	0.096786	Crls1
ENSMUSG00000038894	2163.08	-0.271929	0.107208	-2.53646	0.0111978	0.096786	Irs2
ENSMUSG00000112925	20.3898	-1.53016	0.603336	-2.53617	0.0112072	0.096786	Gm31763
ENSMUSG00000021614	12855.6	-0.551909	0.217702	-2.53516	0.0112396	0.0970158	Vcan
ENSMUSG00000020908	414.995	-3.59002	1.41622	-2.53494	0.0112466	0.0970272	Myh3
ENSMUSG00000037085	566.295	0.264118	0.104201	2.5347	0.0112543	0.0970438	Trmt12
ENSMUSG00000026135	1572.53	-0.228681	0.0902345	-2.5343	0.0112672	0.0971057	Zfp142
ENSMUSG00000042589	752.396	-0.64651	0.255168	-2.53367	0.0112876	0.0972318	Cux2
ENSMUSG00000039263	2158.7	-0.240607	0.0949727	-2.53344	0.011295	0.0972461	Npepl1
ENSMUSG00000029632	5060.07	0.294081	0.116142	2.53208	0.0113389	0.0974756	Ndufa4
ENSMUSG00000047694	1173.3	0.218323	0.0862207	2.53214	0.0113368	0.0974756	Yipf6
ENSMUSG00000057637	5897.04	-0.235725	0.0930907	-2.53221	0.0113346	0.0974756	Prdm2
ENSMUSG00000028517	4683.09	-0.232682	0.0919033	-2.53182	0.0113474	0.0974987	Plpp3
ENSMUSG00000022103	2246.29	-0.281742	0.111292	-2.53156	0.0113556	0.0975062	Gfra2
ENSMUSG00000041842	236.571	-0.562722	0.222294	-2.53143	0.0113598	0.0975062	Fhdc1
ENSMUSG00000068663	1849.12	-0.228404	0.0902432	-2.53098	0.0113744	0.0975822	Clec16a
ENSMUSG00000033933	2290.22	0.17115	0.0676392	2.53034	0.0113952	0.0976618	Vhl
ENSMUSG00000074579	151.005	0.477614	0.188752	2.53038	0.0113939	0.0976618	Lekr1
ENSMUSG00000064252	50.7802	0.961597	0.380171	2.52938	0.0114265	0.0978803	Or2t29
ENSMUSG00000075296	129.106	0.54911	0.217134	2.5289	0.0114419	0.0979628	Aldh3b2
ENSMUSG00000039536	5660.19	-0.232389	0.0919092	-2.52846	0.0114564	0.0980372	Stau1
ENSMUSG00000100210	13.8842	1.94228	0.768586	2.52709	0.0115013	0.0983718	H3c7
ENSMUSG00000062234	4619.4	-0.185102	0.0733344	-2.52409	0.0116	0.0991653	Gak
ENSMUSG00000032320	6098.04	0.157945	0.0625905	2.52346	0.0116207	0.0992921	Rcn2
ENSMUSG00000042834	18496.5	0.269311	0.106739	2.52307	0.0116335	0.0993513	Nrep
ENSMUSG00000020048	72593.6	-0.24349	0.0965271	-2.52251	0.0116522	0.099461	Hsp90b1
ENSMUSG00000089945	29.7985	-0.94296	0.37385	-2.5223	0.0116591	0.0994699	Pakap
ENSMUSG00000062031	2363.25	-0.279614	0.110904	-2.52123	0.0116946	0.099722	Pgghg
ENSMUSG00000020246	1382.77	0.205349	0.0814656	2.52068	0.0117127	0.0997764	Hcfc2
ENSMUSG00000022679	207.828	0.394055	0.15632	2.52083	0.0117078	0.0997764	Mpv17l
ENSMUSG00000034786	254.889	-0.415169	0.164737	-2.5202	0.0117288	0.0998632	Gpsm3
ENSMUSG00000021028	662.558	0.317582	0.126034	2.51981	0.0117419	0.0999245	Mbip
ENSMUSG00000070709	481.269	0.311724	0.123749	2.519	0.011769	0.100054	Zfp974
ENSMUSG00000074622	2270.43	0.391969	0.155598	2.51912	0.011765	0.100054	Mafb
ENSMUSG00000024960	6665.69	-0.172546	0.0685386	-2.5175	0.0118192	0.100431	Plcb3
ENSMUSG00000039477	19129.8	-0.28494	0.113232	-2.51642	0.0118555	0.100688	Tnrc18
ENSMUSG00000020962	2377.37	0.352148	0.140046	2.51451	0.0119198	0.101133	Gtf2a1
ENSMUSG00000024474	7464.72	-0.292909	0.116482	-2.51463	0.0119157	0.101133	Ik
ENSMUSG00000078670	685.16	-0.333445	0.132636	-2.51398	0.0119377	0.101234	Fam174b
ENSMUSG00000027663	932.308	0.321261	0.127825	2.51329	0.0119611	0.101381	Zmat3
ENSMUSG00000020954	4184.79	0.189216	0.0753519	2.5111	0.0120355	0.101706	Strn3
ENSMUSG00000021796	7793.11	0.189085	0.0752972	2.51118	0.0120329	0.101706	Bmpr1a
ENSMUSG00000024446	471.444	0.258102	0.102769	2.51149	0.0120222	0.101706	Rpp21
ENSMUSG00000024558	593.38	-0.393688	0.156753	-2.51151	0.0120215	0.101706	Mapk4
ENSMUSG00000038564	3121.62	-0.218744	0.0871096	-2.51113	0.0120346	0.101706	Ift172
ENSMUSG00000097743	349.776	-0.485021	0.1931	-2.51176	0.0120131	0.101706	Gm16973
ENSMUSG00000048096	59.416	-0.71195	0.283689	-2.50961	0.0120863	0.101983	Lmod1
ENSMUSG00000055805	169.993	-0.624438	0.248808	-2.50972	0.0120827	0.101983	Fmnl1
ENSMUSG00000086039	14.8594	-1.73533	0.691399	-2.50988	0.0120771	0.101983	Gm12227
ENSMUSG00000056167	4411.6	-0.206726	0.0823974	-2.50889	0.0121113	0.102143	Cnot10
ENSMUSG00000002111	67.2636	-0.679687	0.270933	-2.50869	0.012118	0.102149	Spi1
ENSMUSG00000025730	2257.36	-0.184201	0.0734743	-2.50701	0.0121758	0.102584	Rab40c
ENSMUSG00000021279	9797.11	-0.192197	0.0767336	-2.50473	0.0122545	0.103145	Cdc42bpb
ENSMUSG00000071723	545.945	-0.280735	0.112076	-2.50486	0.0122499	0.103145	Gspt2
ENSMUSG00000034317	4277.77	0.381133	0.152216	2.5039	0.0122833	0.103336	Trim59
ENSMUSG00000032251	371.117	0.344013	0.137441	2.50298	0.0123151	0.103538	Irak1bp1
ENSMUSG00000053226	224.219	-0.345473	0.138041	-2.50268	0.0123257	0.103538	Dand5
[truncated: 28,536 more rows]
